# Supplementary material for: Understanding Conformational Preferences of Atropisomeric Hydrazides and Its Influence on Excited State Transformations in Crystalline Media
Source: MDPI journal article supplement (doi:10.3390/molecules24163001), 2019-08-19
Supplement: s1 [file s1]

# Understanding conformational preferences of atropisomeric hydrazides and its influence on excited state transformations in crystalline media.

Akila Iyer,<sup>a,b</sup> Angel Ugrinov,<sup>a</sup> and Jayaraman Sivaguru<sup>b\*</sup>

<sup>a</sup> North Dakota State University, Department of Chemistry and Biochemistry,  
Fargo, ND 43403 USA.

<sup>b</sup> Center for Photochemical Science and Department of Chemistry, Bowling  
Green State University, Bowling Green, Ohio 43403, USA

*e-Mail:* [sivagj@bgsu.edu](mailto:sivagj@bgsu.edu)

---

## Table of Contents

|                                                                                                                          |           |
|--------------------------------------------------------------------------------------------------------------------------|-----------|
| <b>1. General methods .....</b>                                                                                          | <b>2</b>  |
| 1.1. Single crystal XRD analysis.....                                                                                    | 3         |
| <b>2. Chemical structures of hydrazides and corresponding photoproducts .....</b>                                        | <b>4</b>  |
| <b>3. Synthetic protocol for the synthesis of hydrazide derivative (R)-2d .....</b>                                      | <b>5</b>  |
| 3.1. Synthesis of hydrazide derivative (R)-6.....                                                                        | 5         |
| 3.2. Synthesis of hydrazide derivative (R)-2d.....                                                                       | 8         |
| <b>4. General irradiation procedures and characterization of photoproduct(s) .....</b>                                   | <b>15</b> |
| 4.1. Procedure for photoreaction .....                                                                                   | 15        |
| <b>5. Photoreaction of hydrazide derivative (R)-2d in solution .....</b>                                                 | <b>16</b> |
| 5.1. Characterization of photoproduct (R)-4d .....                                                                       | 17        |
| <b>6. HPLC analysis for hydrazides .....</b>                                                                             | <b>19</b> |
| 6.1. HPLC analysis for hydrazide derivative (R)-6.....                                                                   | 19        |
| 6.2. HPLC analysis for hydrazide derivative (R)-2d .....                                                                 | 19        |
| 6.3. HPLC analysis conditions for hydrazide derivative (R)-4d by direct irradiation (crude sample was injected) .....    | 20        |
| 6.4. HPLC analysis conditions for hydrazide derivative (R)-4d by sensitized irradiation (crude sample was injected)..... | 20        |
| <b>7. Racemization kinetics of hydrazide derivative 2c .....</b>                                                         | <b>21</b> |
| <b>8. References .....</b>                                                                                               | <b>22</b> |

## 1. General methods

All commercially obtained reagents/solvents were used as received; chemicals were purchased from Alfa Aesar<sup>®</sup>, Sigma-Aldrich<sup>®</sup>, Acros organics<sup>®</sup>, TCI America<sup>®</sup>, Mallinckrodt<sup>®</sup>, and Oakwood<sup>®</sup> Products, and were used as received without further purification. The synthesis and characterization of hydrazides **1** and **2a-c** as well as their corresponding photoproducts i.e. **3** and **4a-c** are reported in our previous communications.<sup>[1]</sup> Unless stated otherwise, reactions were conducted in oven-dried glassware under nitrogen atmosphere. The compounds were purified by combiflash equipped with dual wavelength UV-Vis absorbance detector (Teledyne ISCO) using hexanes: ethyl acetate as the mobile phase and Redisep<sup>®</sup> cartridge filled with silica (Teledyne ISCO) as stationary phase. In some cases, compounds were purified by column chromatography on silica gel (Sorbent Technologies<sup>®</sup>, silica gel standard grade: porosity 60 Å, particle size: 230 x 400 mesh, surface area: 500 – 600 m<sup>2</sup>/g, bulk density: 0.4 g/mL, pH range: 6.5 – 7.5). Unless indicated, the Retardation Factor ( $R_f$ ) values were recorded using a 5-50% hexanes:ethyl acetate as mobile phase and on Sorbent Technologies<sup>®</sup>, silica Gel TLC plates (200 mm thickness w/UV254).

The residual solvent signal was used as reference. (CDCl<sub>3</sub>:  $\delta_H$  = 7.26 ppm,  $\delta_C$  = 77.2 ppm). Data for <sup>1</sup>H NMR spectra are reported as follows: chemical shift ( $\delta$  ppm), multiplicity, coupling constant (Hz) and integration. The following abbreviations were used to explain the multiplicities: s = singlet, d = doublet, t = triplet, q = quartet, m = multiplet, quin = quintuplet, sext = sextet, sep = septet, b = broad. In some instances, it was not possible to obtain a signal for the carbonyl carbon, despite long relaxation times and concentrated samples. However these signals are reported wherever possible. High-resolution mass spectrum data in Electrospray Ionization mode were recorded on a Bruker – Daltronics<sup>®</sup> BioTof mass spectrometer in positive (ESI+) ion mode.

HPLC analyses were performed on Waters<sup>®</sup> HPLC equipped with 2525 pump or on Dionex<sup>®</sup> Ultimate 3000 HPLC. Waters<sup>®</sup> 2767 sample manager was used for automated sample injection. All HPLC injections were monitored using a Waters<sup>®</sup> 2487 dual wavelength absorbance detector at 254 nm and 270 nm. Analytical and semi-preparative injections were performed on chiral stationary phase using various columns indicated below:

- i. Regis<sup>®</sup> PIRKLE COVALENT (R,R) WHELK-01
  - a) 25 cm x 4.6 mm column for analytical injections
  - b) 25 cm x 10 mm column for semi-preparative injections.

- ii. CHIRACEL<sup>®</sup> OD-H
  - a) 0.46 cm x 25 cm column for analytical injections
  - b) 25 cm x 10 mm column for semi-preparative injections.

- iii. CHIRALPAK<sup>®</sup> IC
  - a) 0.46 cm x 25 cm column for analytical injections
  - b) 10 mm x 25 cm column for semi-preparative injections

- iv. CHIRALPAK<sup>®</sup> AD-H
  - a) 0.46 cm x 25 cm column for analytical injections
  - b) 25 cm x 10 mm column for semi-preparative injections

Masslynx software version 4.1 was used to analyze/process the HPLC injections. Masslynx software version 4.1 was used for analyzing HPLC injections on Waters<sup>®</sup>. Chromeleon 7.0 software was used for analyzing HPLC injections on Dionex<sup>®</sup> HPLC. Igor Pro<sup>®</sup> Software version 3.0 was used for processing HPLC chromatograms.

### 1.1. Single crystal XRD analysis

Single crystal X-ray diffraction data of the compounds **2a** and **2c** were collected on a Bruker Apex Duo diffractometer with a Apex 2 CCD area detector at T = 100 K. ImSCu source radiation was used. All structures were process with Apex 2 v2010.9-1 software package (SAINT v. 7.68A, XSELL v. 6.3.1). Direct method was used to solve the structures after multi-scan absorption corrections.

## 2. Chemical structures of hydrazides and corresponding photoproducts

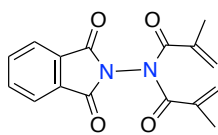

**1**

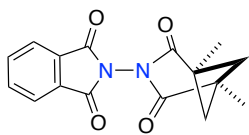

**3**

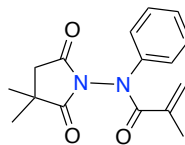

**2a**

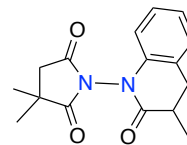

**4a**

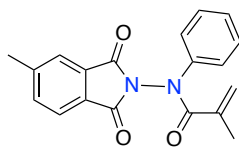

**2b**

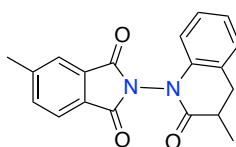

**4b**

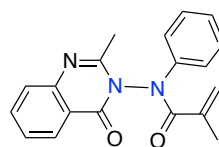

**2c**

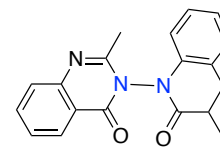

**4c**

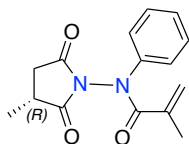

**2d**

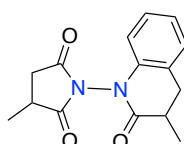

**4d**

### 3. Synthetic protocol for the synthesis of hydrazide derivative (*R*)-2d

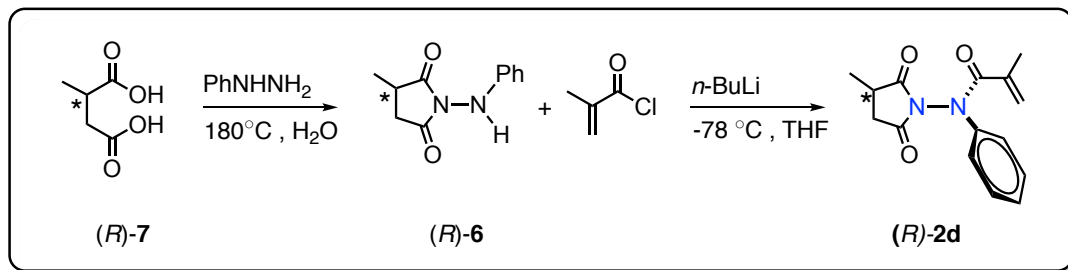

**Scheme S1:** Synthesis of hydrazide derivative (*R*)-2d.

#### 3.1. Synthesis of hydrazide derivative (*R*)-6

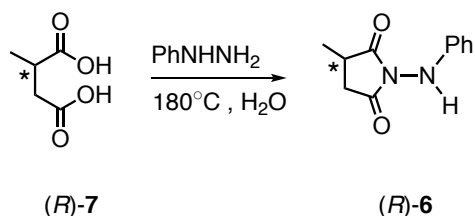

**Scheme S2:** Synthesis of hydrazide derivative (*R*)-6

Following the modified procedure reported by Kamiński et al., a suspension of (*R*)-(+)-methyl-succinic acid (*R*)-7 (1 equiv) in water (10 mL per gram of acid), phenyl hydrazine (1 equiv) was added.<sup>[2]</sup> The mixture was heated in an oil bath at 180 °C with simultaneous removal of water. After 1 h, the mixture was brought to room temperature and the crude was diluted with ethyl acetate and the organic layer was sequentially washed with 10% HCl, (2 × 10 mL), DI water (2 × 10 mL), saturated NaHCO<sub>3</sub> (2 × 10 mL) and finally with brine. The organic layer was dried over anhyd Na<sub>2</sub>SO<sub>4</sub>, filtered and the solvent was removed under reduced pressure to yield crude product. After concentrating the organic layer, the crude product was purified by combiflash using hexanes and ethyl acetate mixture to get the desired compound.

TLC condition - R<sub>f</sub> = 0.3 (50% ethyl acetate:hexanes). Crystalline solid (Yield = 40%)

$^1\text{H}$ -NMR (400 MHz,  $\text{CDCl}_3$ ,  $\delta$  ppm): 1.41 (d, 3H,  $J$  7.2Hz), 2.44 (dd, 1H,  $J_1$  17.6Hz,  $J_2$  3.6Hz), 2.95-3.07 (m, 2H), 6.09 (bs, 1H), 6.76 (d, 2H,  $J$  8Hz), 6.97 (t, 1H,  $J$  7.6Hz) and 7.21-7.25 (m, 2H).

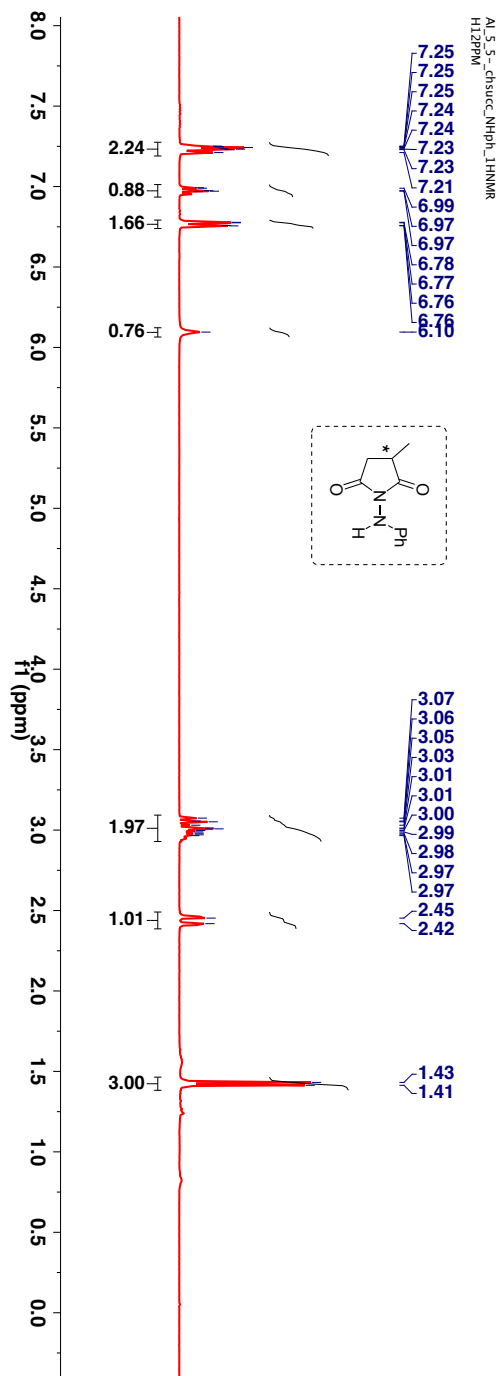

$^{13}\text{C}$ -NMR (100 MHz,  $\text{CDCl}_3$ ,  $\delta$  ppm): 17.2, 34.3, 34.9, 114.9, 123.0, 129.6, 145.3, 174.1 and 179.4.

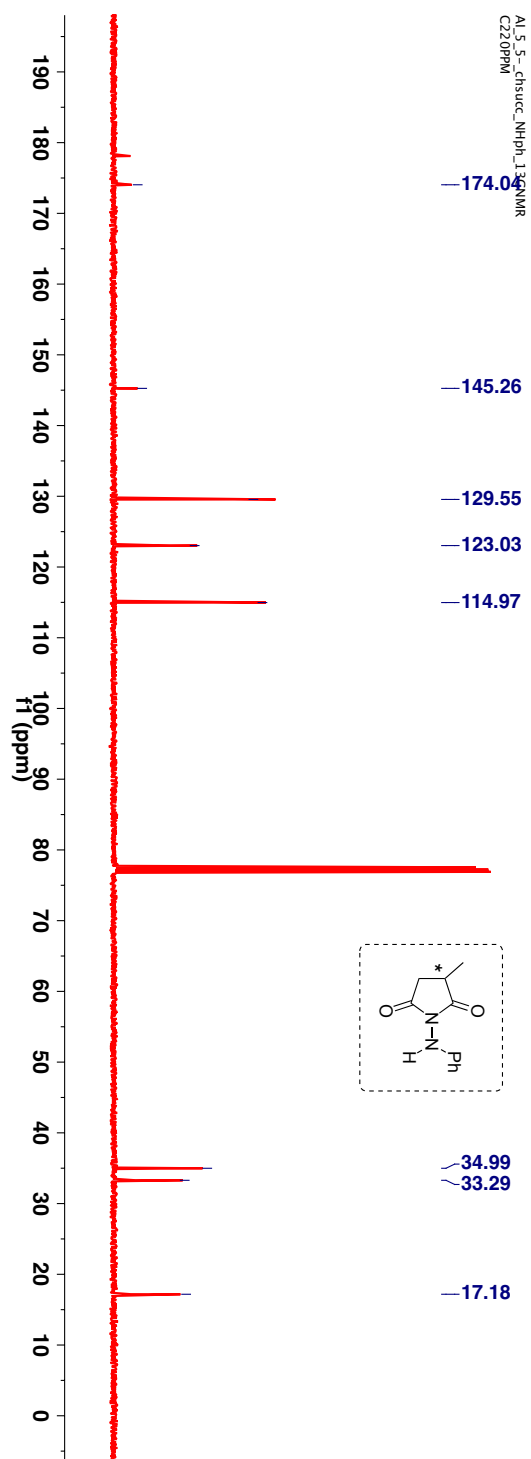

### 3.2. Synthesis of hydrazide derivative (R)-2d

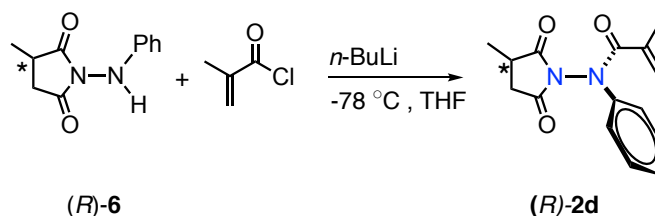

**Scheme S3:** Synthesis of hydrazide derivative (R)-2d

Hydrazide derivative (R)-6 (1 equiv) was dissolved in anhydrous THF under an inert atmosphere. The solution was then cooled to  $-78\text{ }^{\circ}\text{C}$ . To this cold solution  $n\text{-BuLi}$  (2.5 M, 1.1 equiv) was added slowly. The mixture was stirred at this temperature for 1 h. The reaction was quenched with anhydrous methacryloyl chloride (1.3 equiv). The stirring was continued for another 2 h after which the solution was quenched with slow addition of  $\sim 10\text{ mL}$  of saturated  $\text{NH}_4\text{Cl}$ . (Note: the solution was quenched at  $-78\text{ }^{\circ}\text{C}$ ). The solution was further stirred for 35 min and then diluted with diethyl ether and the organic layer was sequentially washed with DI water ( $2 \times 10\text{ mL}$ ), saturated  $\text{NaHCO}_3$  ( $2 \times 10\text{ mL}$ ) and finally with brine. The organic layer was dried over anhyd  $\text{Na}_2\text{SO}_4$ , filtered and the solvent was removed under reduced pressure to yield crude product. After concentrating the organic layer, the crude product was purified by combiflash using hexanes and ethyl acetate mixture to get the desired compound.

TLC condition -  $R_f = 0.6$  (50% ethyl acetate:hexanes).

Crystalline clear solid (Yield = 75%).



# Crude NMR

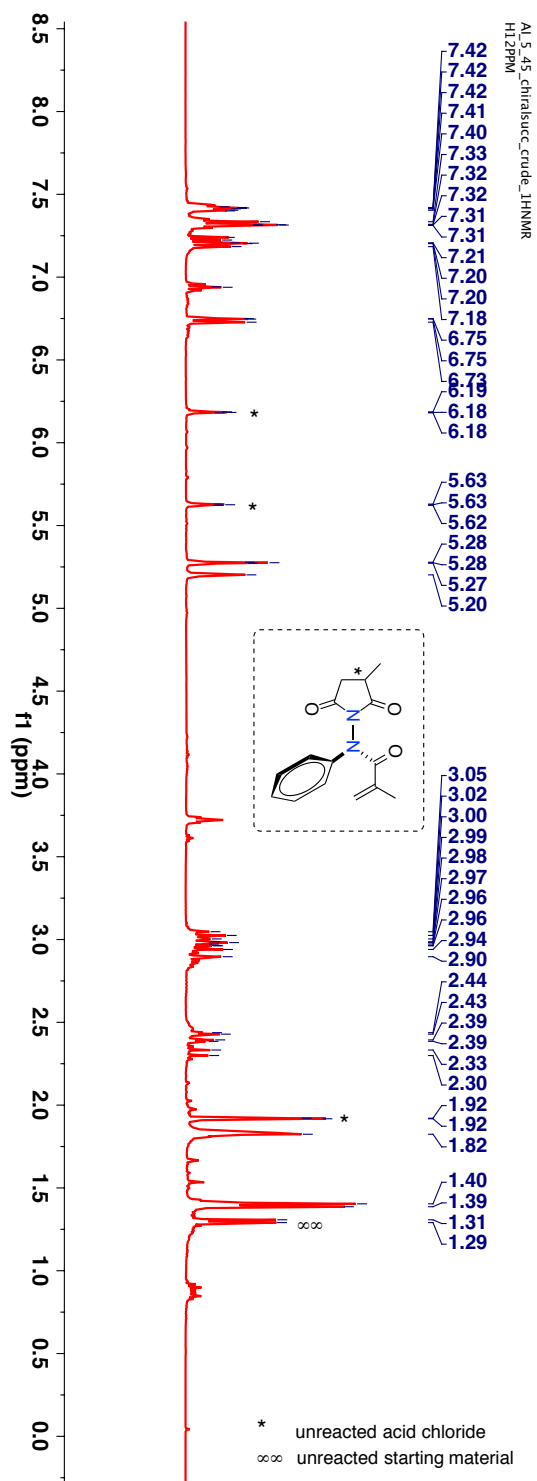

$^1\text{H}$ -NMR (400 MHz,  $\text{CDCl}_3$ ,  $\delta$  ppm, rotamer peaks are reported together): 1.29 (d,  $J$  6.8 Hz), 1.39-1.43 (m), 1.83 (bs), 2.28-2.45 (m), 2.84-3.05 (m), 5.19 (s), 5.27 (m), 7.29-7.35 (m) and 7.40-7.43 (m).

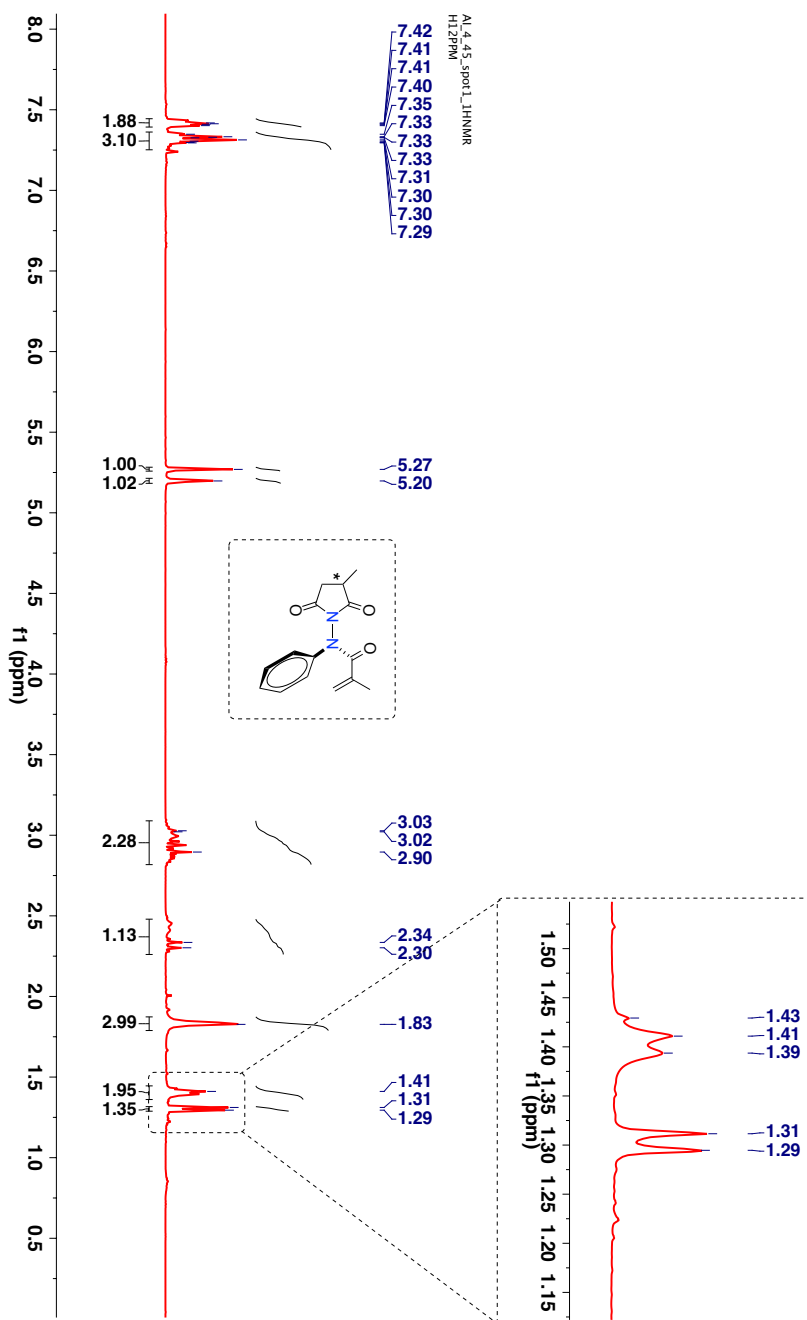

| Parameters                |                                                    |  |
|---------------------------|----------------------------------------------------|--|
| Parameter                 | Value (f2, f1)                                     |  |
| 1 Origin                  | Bruker BioSpin GmbH                                |  |
| 2 Solvent                 | CDCl <sub>3</sub>                                  |  |
| 3 Temperature             | 298.2                                              |  |
| 4 Experiment              | COSY                                               |  |
| 5 Probe                   | 5 mm PABBO BB/<br>19F-1H/ D Z-GRD<br>Z108618/ 0645 |  |
| 6 Number of Scans         | 4                                                  |  |
| 7 Receiver Gain           | 197                                                |  |
| 8 Relaxation Delay        | 2.0000                                             |  |
| 9 Pulse Width             | 14.7000                                            |  |
| 10 Acquisition Date       | 2015-07-29T12:52:02                                |  |
| 11 Spectrometer Frequency | (400.13, 400.13)                                   |  |
| 12 Spectral Width         | (5341.9, 5341.9)                                   |  |
| 13 Lowest Frequency       | (-265.3, -265.3)                                   |  |
| 14 Nucleus                | (1H, 1H)                                           |  |
| 15 Acquired Size          | (1024, 128)                                        |  |
| 16 Spectral Size          | (1024, 1024)                                       |  |

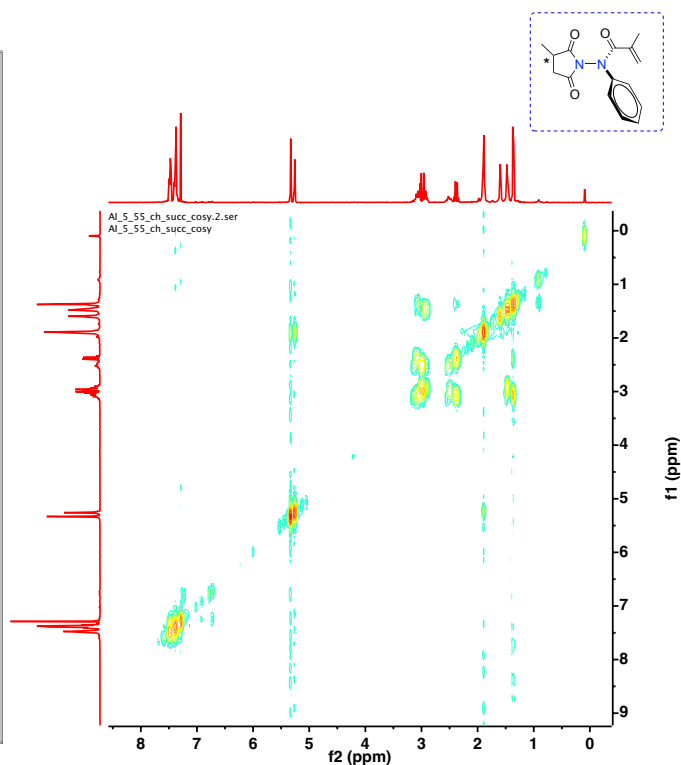

| Parameters                |                                                    |  |
|---------------------------|----------------------------------------------------|--|
| Parameter                 | Value (f2, f1)                                     |  |
| 1 Origin                  | Bruker BioSpin GmbH                                |  |
| 2 Solvent                 | CDCl <sub>3</sub>                                  |  |
| 3 Temperature             | 298.2                                              |  |
| 4 Experiment              | COSY                                               |  |
| 5 Probe                   | 5 mm PABBO BB/<br>19F-1H/ D Z-GRD<br>Z108618/ 0645 |  |
| 6 Number of Scans         | 4                                                  |  |
| 7 Receiver Gain           | 197                                                |  |
| 8 Relaxation Delay        | 2.0000                                             |  |
| 9 Pulse Width             | 14.7000                                            |  |
| 10 Acquisition Date       | 2015-07-29T12:52:02                                |  |
| 11 Spectrometer Frequency | (400.13, 400.13)                                   |  |
| 12 Spectral Width         | (5341.9, 5341.9)                                   |  |
| 13 Lowest Frequency       | (-265.3, -265.3)                                   |  |
| 14 Nucleus                | (1H, 1H)                                           |  |
| 15 Acquired Size          | (1024, 128)                                        |  |
| 16 Spectral Size          | (1024, 1024)                                       |  |

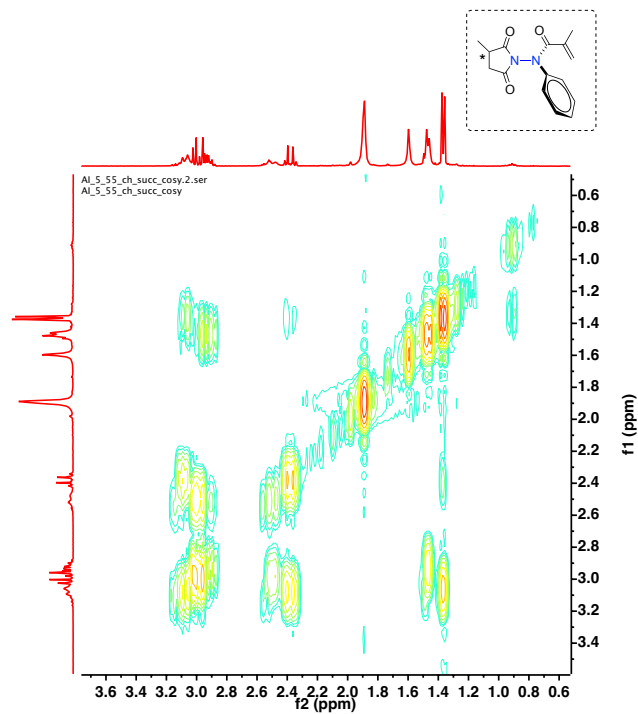

**Figure S1:** COSY (400 MHz, CDCl<sub>3</sub>, δ ppm) spectrum of (*R*)-2d.

| Parameters                   |                                                    |  |
|------------------------------|----------------------------------------------------|--|
| Parameter                    | Value (f2, f1)                                     |  |
| 1 Origin                     | Bruker BioSpin GmbH                                |  |
| 2 Solvent                    | CDCl <sub>3</sub>                                  |  |
| 3 Temperature                | 298.2                                              |  |
| 4 Experiment                 | NOESY                                              |  |
| 5 Probe                      | 5 mm PABBO BB/<br>19F-1H/ D Z-GRD<br>Z108618/ 0645 |  |
| 6 Number of<br>Scans         | 16                                                 |  |
| 7 Receiver Gain              | 172                                                |  |
| 8 Relaxation<br>Delay        | 2.0000                                             |  |
| 9 Pulse Width                | 14.7000                                            |  |
| 10 Acquisition<br>Date       | 2015-09-09T14:24:00                                |  |
| 11 Spectrometer<br>Frequency | (400.13, 400.13)                                   |  |
| 12 Spectral<br>Width         | (4807.7, 4807.7)                                   |  |
| 13 Lowest<br>Frequency       | (67.0, 67.0)                                       |  |
| 14 Nucleus                   | (1H, 1H)                                           |  |
| 15 Acquired Size             | (1024, 256)                                        |  |
| 16 Spectral Size             | (1024, 1024)                                       |  |

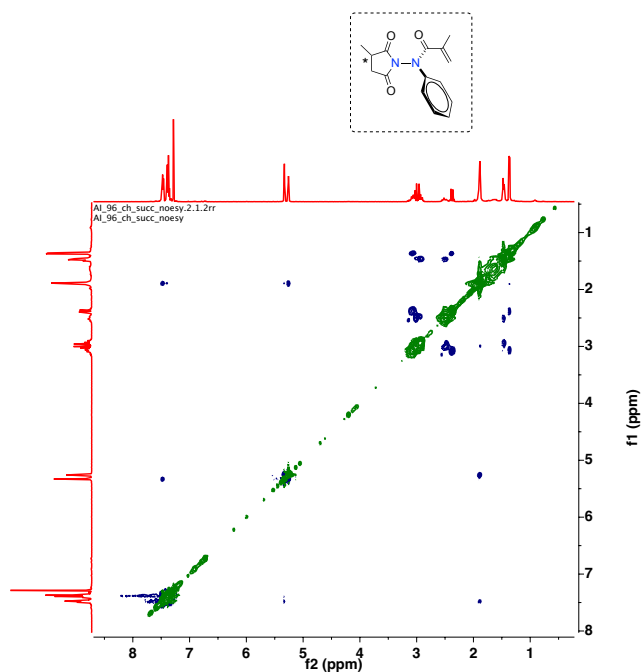

| Parameters                   |                                                    |  |
|------------------------------|----------------------------------------------------|--|
| Parameter                    | Value (f2, f1)                                     |  |
| 1 Origin                     | Bruker BioSpin GmbH                                |  |
| 2 Solvent                    | CDCl <sub>3</sub>                                  |  |
| 3 Temperature                | 298.2                                              |  |
| 4 Experiment                 | NOESY                                              |  |
| 5 Probe                      | 5 mm PABBO BB/<br>19F-1H/ D Z-GRD<br>Z108618/ 0645 |  |
| 6 Number of<br>Scans         | 16                                                 |  |
| 7 Receiver Gain              | 172                                                |  |
| 8 Relaxation<br>Delay        | 2.0000                                             |  |
| 9 Pulse Width                | 14.7000                                            |  |
| 10 Acquisition<br>Date       | 2015-09-09T14:24:00                                |  |
| 11 Spectrometer<br>Frequency | (400.13, 400.13)                                   |  |
| 12 Spectral<br>Width         | (4807.7, 4807.7)                                   |  |
| 13 Lowest<br>Frequency       | (67.0, 67.0)                                       |  |
| 14 Nucleus                   | (1H, 1H)                                           |  |
| 15 Acquired Size             | (1024, 256)                                        |  |
| 16 Spectral Size             | (1024, 1024)                                       |  |

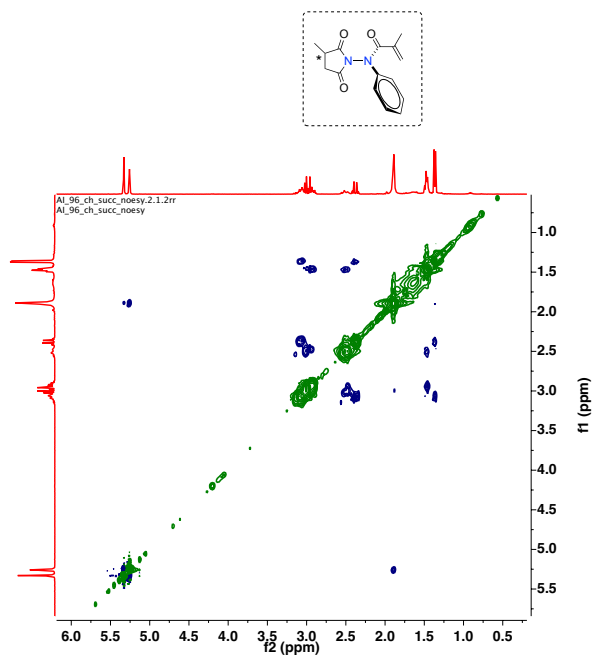

**Figure S2:** NOESY (400 MHz, CDCl<sub>3</sub>,  $\delta$  ppm) spectrum of (*R*)-2d.

$^{13}\text{C}$ -NMR (100 MHz,  $\text{CDCl}_3$ ,  $\delta$  ppm, rotamer peaks are reported together): 21.7, 22.0, 22.1, 38.4, 38.5, 39.9, 40.0, 41.9, 131.6, 132.7, 132.9, 133.8, 133.9, 133.9, 134.3, 134.5, 134.6, 177.5, 177.7, 181.6 and 181.7.

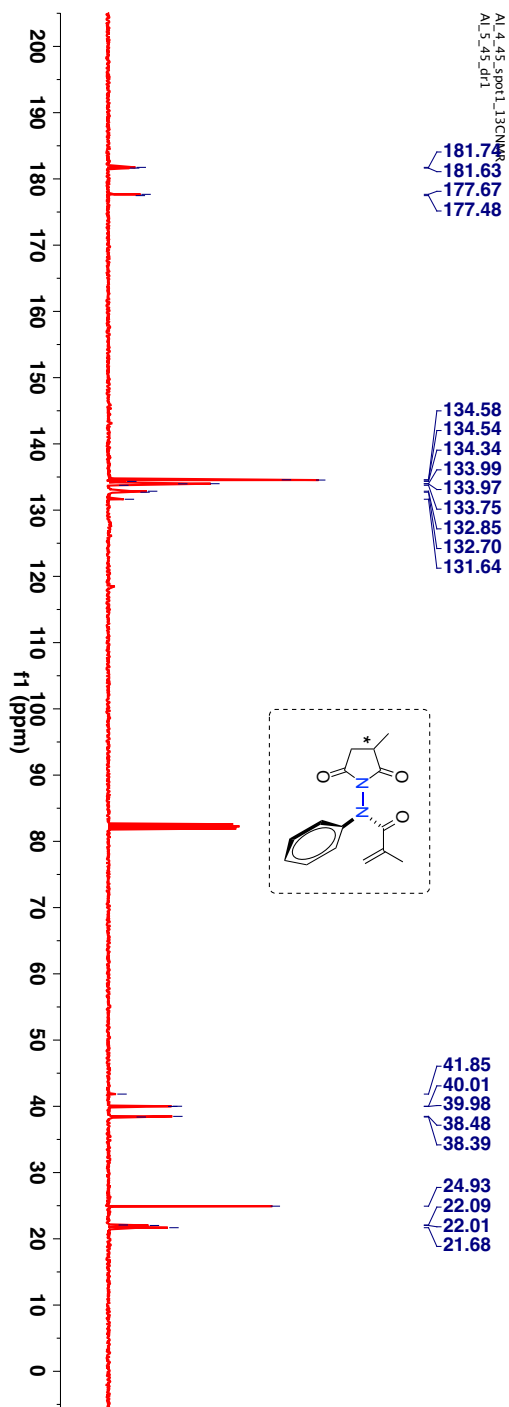

HRMS-ESI (m/z) ([M + Na]):

Chemical Formula:  $C_{16}H_{20}N_2O_3$

Calculated : 295.1059

Observed : 295.1073

$|\Delta m|$  : 4.7 ppm

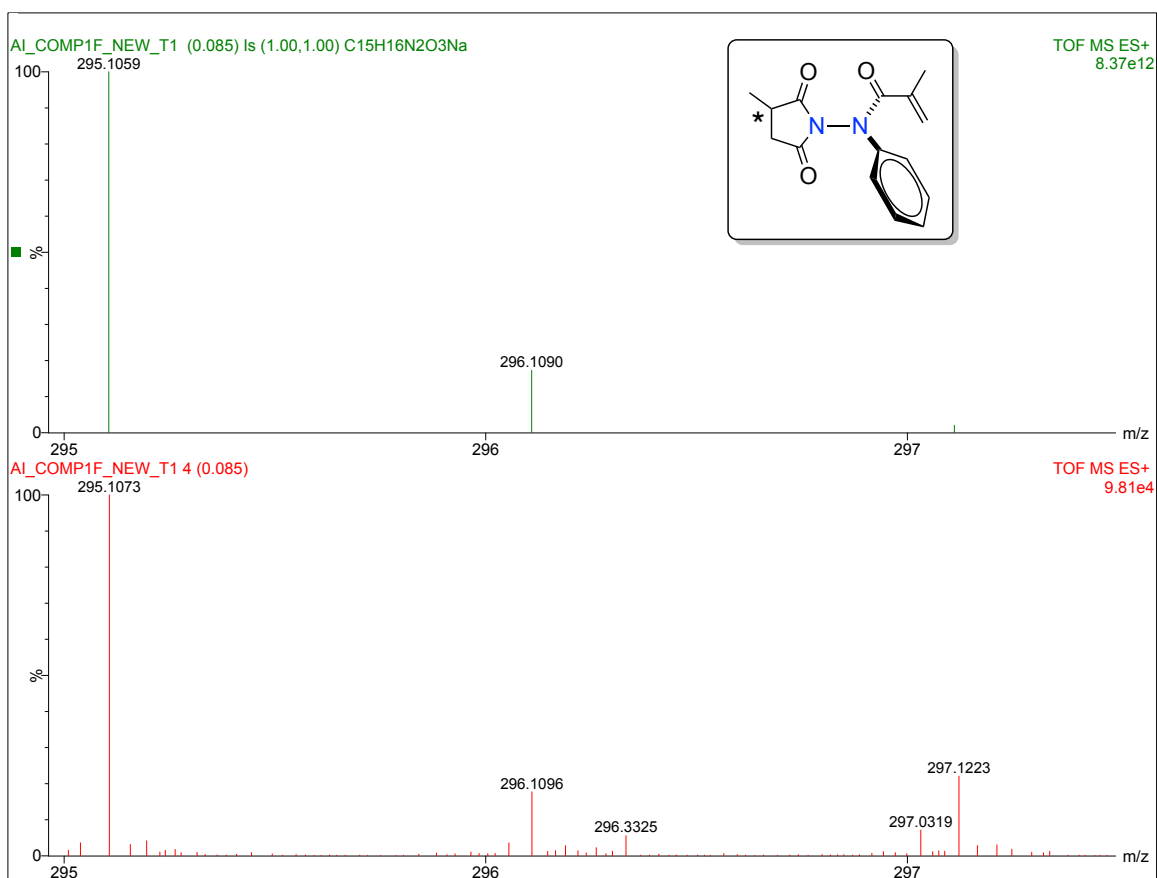

#### **4. General irradiation procedures and characterization of photoproduct(s)**

##### **4.1. Procedure for photoreaction**

###### **a) Sensitized irradiation**

In a pyrex tube, solution of the desired substrate was dissolved in an appropriate solvent. This was followed by addition of thioxanthone and then the solution was deoxygenated by purging N<sub>2</sub>. The sample was then irradiated at ambient temperature in a Rayonet reactor equipped with ~420 nm tubes (16 tubes x 14 Watt).

###### **b) Direct irradiation**

In a pyrex tube, solution of the desired substrate was dissolved in an appropriate solvent. The solution was then deoxygenated by purging N<sub>2</sub>. The sample was then irradiated at ambient temperature in a Rayonet reactor equipped with ~300 nm tubes (16 tubes x 12 Watt).

## 5. Photoreaction of hydrazide derivative (*R*)-2d in solution

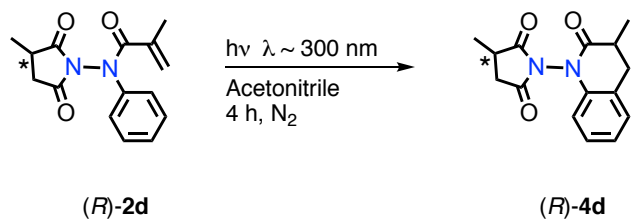

**Scheme S4:**  $6\pi$  Photocyclization of hydrazide derivative (*R*)-2d by direct irradiation.

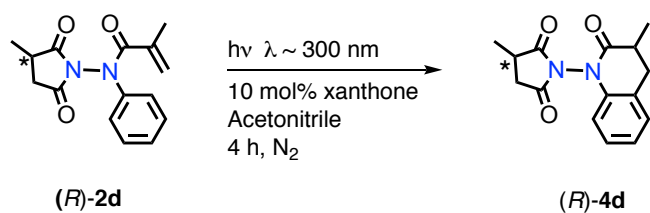

**Scheme S5:**  $6\pi$  Photocyclization of hydrazide derivative (*R*)-2d under the conditions of sensitized irradiation.



### 5.1. Characterization of photoproduct (*R*)-**4d**

TLC condition -  $R_f = 0.4$  (50% hexanes:ethyl acetate). Clear solid (Yield = 75%).

$^1\text{H-NMR}$  (400 MHz,  $\text{CDCl}_3$ ,  $\delta$  ppm): 1.31-1.33 (m), 1.46-1.52 (m), 2.52-2.61(m), 2.90-3.18 (m), 6.53-6.61 (m), 7.01-7.05 (m) and 7.14-7.20 (m).

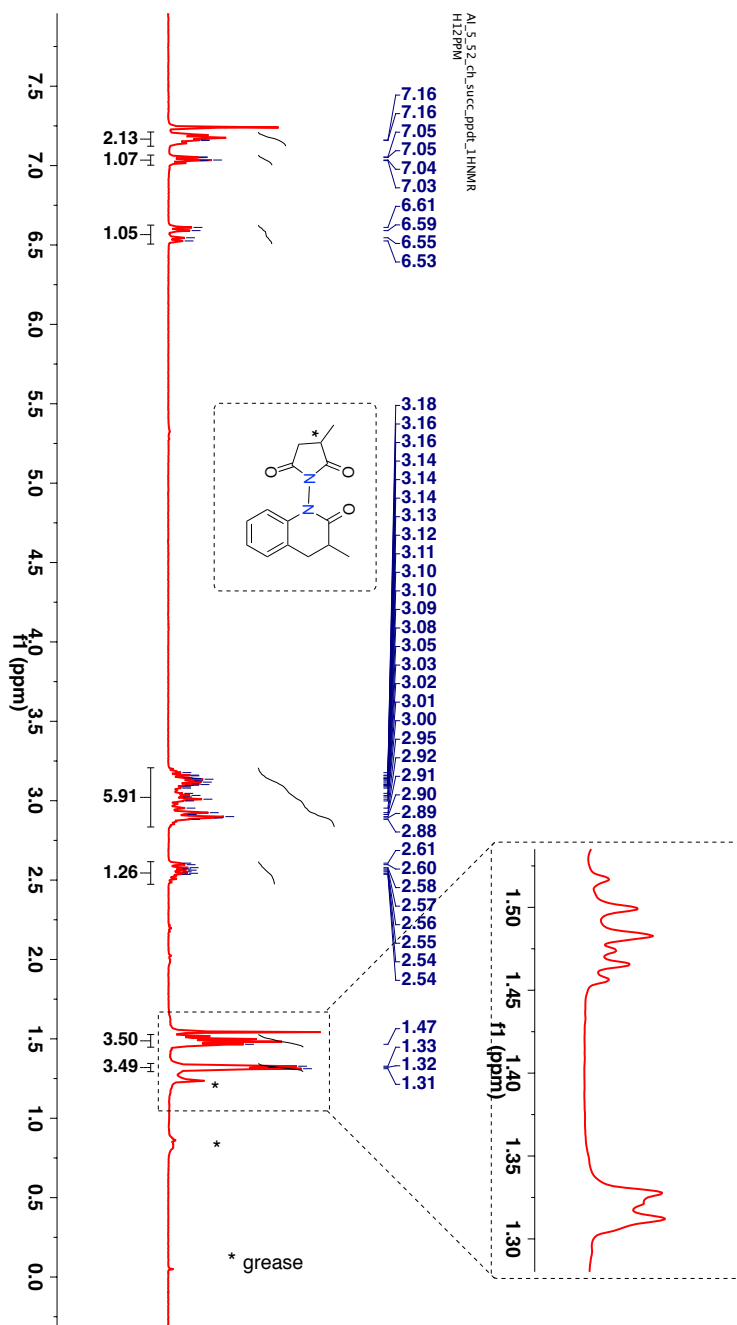

$^{13}\text{C}$ -NMR (100 MHz,  $\text{CDCl}_3$ ,  $\delta$  ppm): 15.4, 15.4, 17.1, 17.3, 17.4, 17.4, 33.1, 33.2, 33.6, 33.7, 33.8, 35.1, 35.2, 35.2, 35.3, 35.7, 35.7, 112.6, 112.7, 112.9, 112.9, 124.4, 124.7, 124.7, 127.9, 127.9, 127.9, 128.5, 128.5, 128.6, 138.1, 169.6, 169.6, 172.1, 172.7, 175.9, 176.2 and 176.8.

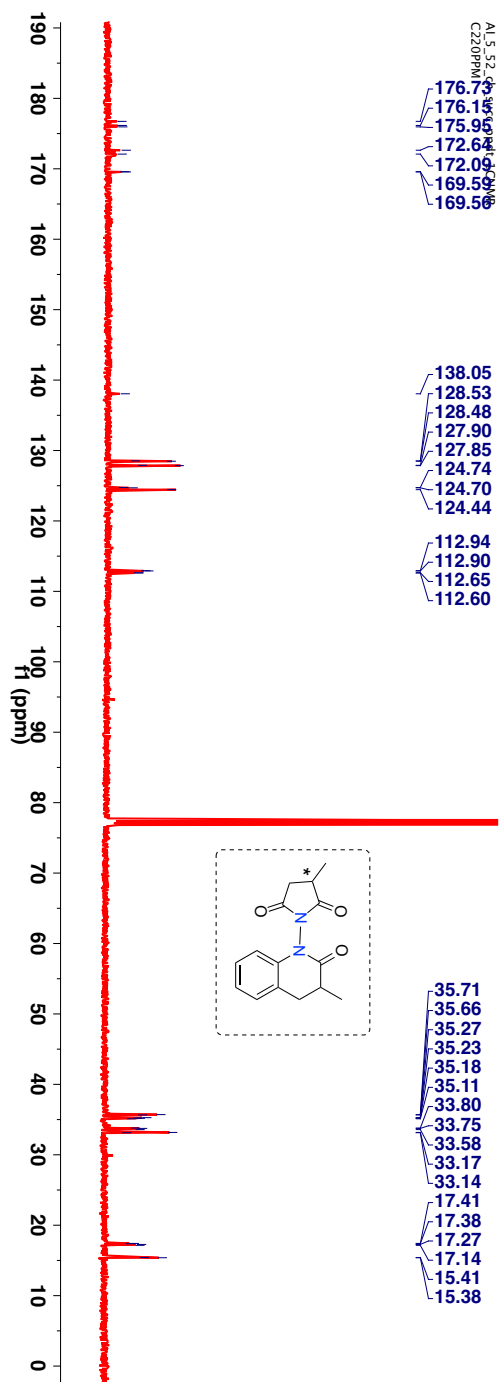

## 6. HPLC analysis for hydrazides

### 6.1. HPLC analysis for hydrazide derivative (*R*)-6

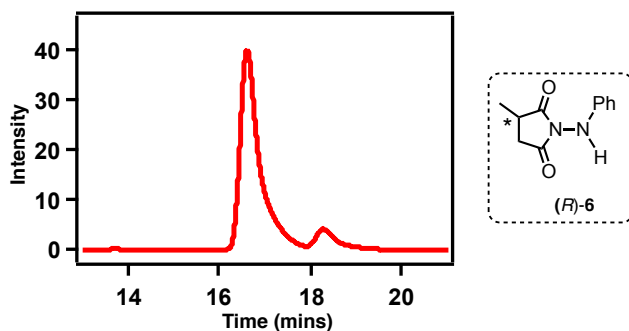

For analytical conditions,

|                          |                               |
|--------------------------|-------------------------------|
| Column                   | : CHIRALPAK <sup>®</sup> AD-H |
| Abs. detector wavelength | : 254 nm and 270 nm           |
| Mobile phase             | : Hexanes:2-propanol = 80:20  |
| Flow rate                | : 0.8 mL/min                  |
| Retention times (min)    | : pA 16.6 and pB 18.3         |
| Relative area            | : pA ~ 94% and pB ~ 6%        |

### 6.2. HPLC analysis for hydrazide derivative (*R*)-2d

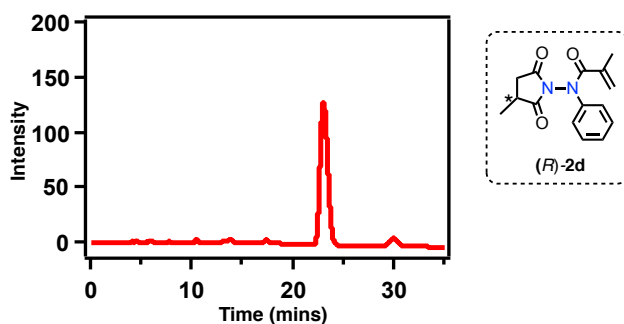

|                          |                              |
|--------------------------|------------------------------|
| Column                   | : CHIRALPAK <sup>®</sup> IC  |
| Abs. detector wavelength | : 254 nm and 270 nm          |
| Mobile phase             | : Hexanes:2-propanol = 70:30 |
| Flow rate                | : 0.8 mL/min                 |
| Retention times (min)    | : pA ~23.0                   |

6.3. HPLC analysis conditions for hydrazide derivative (*R*)-**4d** by direct irradiation (crude sample was injected)

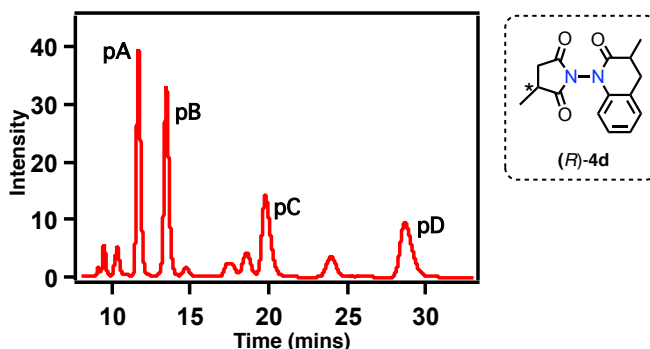

For analytical conditions,

|                          |                                          |
|--------------------------|------------------------------------------|
| Column                   | : CHIRALPAK <sup>®</sup> IC              |
| Abs. detector wavelength | : 254 nm and 270 nm                      |
| Mobile phase             | : Hexanes:2-propanol = 70:30             |
| Flow rate                | : 0.8 mL/min                             |
| Retention times (min)    | : pA 11.6, pB 13.4, pC 19.7 and 28.6     |
| Relative area            | : pA ~ 29%, pB ~ 29%, pC = 21%, pD ~ 21% |

6.4. HPLC analysis conditions for hydrazide derivative (*R*)-**4d** by sensitized irradiation (crude sample was injected)

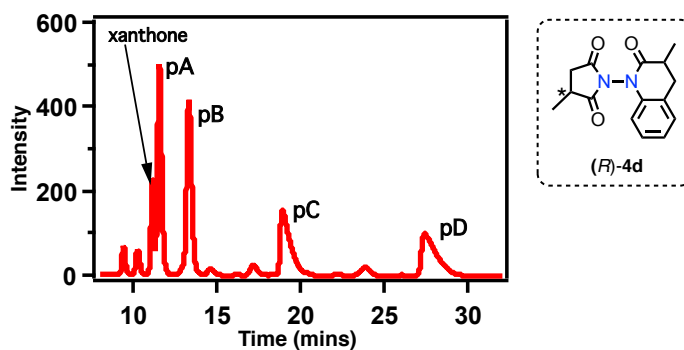

|                          |                                          |
|--------------------------|------------------------------------------|
| Column                   | : CHIRALPAK <sup>®</sup> IC              |
| Abs. detector wavelength | : 254 nm and 270 nm                      |
| Mobile phase             | : Hexanes:2-propanol = 70:30             |
| Flow rate                | : 0.8 mL/min                             |
| Retention times (min)    | : pA 11.6, pB 13.4, pC 19.7 and 28.6     |
| Relative area            | : pA ~ 29%, pB ~ 29%, pC ~ 21%, pD ~ 21% |

## 7. Racemization kinetics of hydrazide derivative 2c

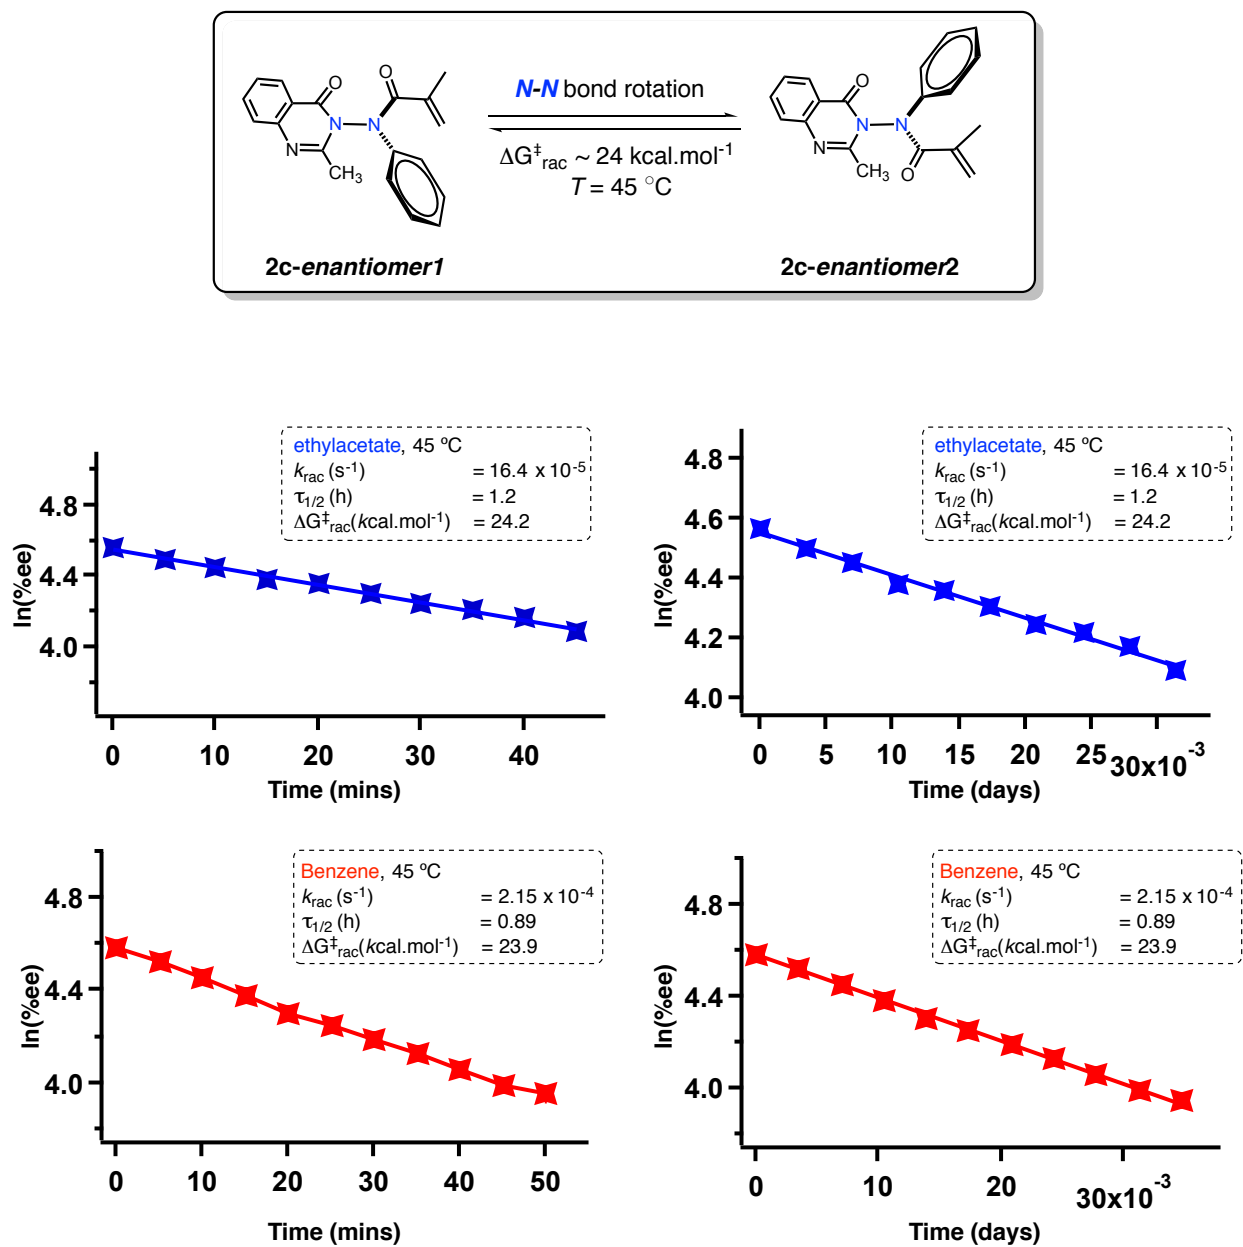

**Figure S3:** Racemization kinetics for quinazolinone based *N-N* atropisomer **2c** in benzene and ethyl acetate.

## 8. References

- [1] a) A. Iyer, S. Jockusch, J. Sivaguru, *Chem Commun* **2017**, 53(10), 1692-1695; b) A. Iyer, S. Ahuja, S. Jockusch, A. Ugrinov, J. Sivaguru, *Chem Commun* **2018**, 54(78), 1021-11024; c) A. Iyer, North Dakota State Univeristy **2016**.
- [2] K. Kamiński, J. Obniska, *Bioorganic & Medicinal Chemistry* **2008**, 16, 4921-4931.

```

data_cu_axi20_0m
_audit_creation_date          2015-09-09
_audit_creation_method
;
Olex2 1.2
(compiled 2015.01.26 svn.r3150 for OlexSys, GUI svn.r4998)
;
_publ_contact_author_address  ?
_publ_contact_author_email    ?
_publ_contact_author_name     ''
_publ_contact_author_phone    ?
_publ_section_references
;
Dolomanov, O.V., Bourhis, L.J., Gildea, R.J., Howard, J.A.K. &
Puschmann, H.
(2009), J. Appl. Cryst. 42, 339–341.

Sheldrick, G.M. (2008). Acta Cryst. A64, 112–122.
;
_chemical_name_common          ?
_chemical_name_systematic      ?
_chemical_formula_moiety       'C15 H16 N2 O3'
_chemical_formula_sum          'C15 H16 N2 O3'
_chemical_formula_weight       272.30
_chemical_absolute_configuration ad
_chemical_melting_point        ?
loop_
  _atom_type_symbol
  _atom_type_description
  _atom_type_scatter_dispersion_real
  _atom_type_scatter_dispersion_imag
  _atom_type_scatter_source
  'C' 'C' 0.0181 0.0091 'International Tables Vol C Tables 4.2.6.8 and
6.1.1.4'
  'H' 'H' 0.0000 0.0000 'International Tables Vol C Tables 4.2.6.8 and
6.1.1.4'
  'N' 'N' 0.0311 0.0180 'International Tables Vol C Tables 4.2.6.8 and
6.1.1.4'
  'O' 'O' 0.0492 0.0322 'International Tables Vol C Tables 4.2.6.8 and
6.1.1.4'

_shelx_space_group_comment
;
The symmetry employed for this shelxl refinement is uniquely defined
by the following loop, which should always be used as a source of
symmetry information in preference to the above space-group names.
They are only intended as comments.
;
_space_group_crystal_system     'monoclinic'
_space_group_IT_number          4

```

```

_space_group_name_H-M_alt      'P 1 21 1'
_space_group_name_Hall         'P 2yb'
loop_
  _space_group_symop_operation_xyz
  'x, y, z'
  '-x, y+1/2, -z'

_cell_length_a                 8.8088(4)
_cell_length_b                 23.6650(11)
_cell_length_c                 14.1477(7)
_cell_angle_alpha              90
_cell_angle_beta               104.096(2)
_cell_angle_gamma              90
_cell_volume                   2860.4(2)
_cell_formula_units_Z          8
_cell_measurement_reflns_used  9595
_cell_measurement_temperature  100(2)
_cell_measurement_theta_max    66.527
_cell_measurement_theta_min    3.724
_shelx_estimated_absorpt_T_max 0.899
_shelx_estimated_absorpt_T_min 0.844
_exptl_absorpt_coefficient_mu  0.732
_exptl_absorpt_correction_T_max 0.7528
_exptl_absorpt_correction_T_min 0.6701
_exptl_absorpt_correction_type multi-scan
_exptl_absorpt_process_details
;
SADABS-2014/2 (Bruker,2014/2) was used for absorption correction.
wR2(int) was 0.1064 before and 0.0701 after correction.
The Ratio of minimum to maximum transmission is 0.8901.
The \l/2 correction factor is 0.00150.
;
_exptl_absorpt_special_details ?
_exptl_crystal_colour          colourless
_exptl_crystal_colour_primary colourless
_exptl_crystal_density_diffn  1.265
_exptl_crystal_density_meas   ?
_exptl_crystal_density_method ?
_exptl_crystal_description     'chunk'
_exptl_crystal_F_000          1152
_exptl_crystal_size_max        0.24
_exptl_crystal_size_mid        0.174
_exptl_crystal_size_min        0.148
_exptl_transmission_factor_max ?
_exptl_transmission_factor_min ?
_diffn_reflns_av_R_equivalents 0.0339
_diffn_reflns_av_unetI/netI    0.0638
_diffn_reflns_Laue_measured_fraction_full 0.974
_diffn_reflns_Laue_measured_fraction_max 0.974
_diffn_reflns_limit_h_max      10

```



```

_diffrn_reflns_limit_h_min      -10
_diffrn_reflns_limit_k_max      27
_diffrn_reflns_limit_k_min      -28
_diffrn_reflns_limit_l_max      16
_diffrn_reflns_limit_l_min      -16
_diffrn_reflns_number           17719
_diffrn_reflns_point_group_measured_fraction_full 0.871
_diffrn_reflns_point_group_measured_fraction_max 0.870
_diffrn_reflns_theta_full       66.779
_diffrn_reflns_theta_max        66.779
_diffrn_reflns_theta_min        3.723
_diffrn_ambient_temperature     100.01
_diffrn_detector_area_resol_mean ?
_diffrn_measured_fraction_theta_full 0.974
_diffrn_measured_fraction_theta_max 0.974
_diffrn_measurement_device_type 'Bruker APEX-II CCD'
_diffrn_measurement_method      '\f and \w scans'
_diffrn_radiation_type          CuK\alpha
_diffrn_radiation_wavelength    1.54178
_diffrn_source                  ?
_diffrn_standards_number        0
_reflns_Friedel_coverage        0.741
_reflns_Friedel_fraction_full   0.761
_reflns_Friedel_fraction_max    0.761
_reflns_number_gt               7549
_reflns_number_total            8826
_reflns_special_details

```

```
;
```

Reflections were merged by SHELXL according to the crystal class for the calculation of statistics and refinement.

\_reflns\_Friedel\_fraction is defined as the number of unique Friedel pairs measured divided by the number that would be possible theoretically, ignoring centric projections and systematic absences.

```
;
```

```

_reflns_threshold_expression    'I > 2\s(I)'
_computing_cell_refinement      'SAINT v8.34A (Bruker, 2013)'
_computing_data_collection      ?
_computing_data_reduction       'SAINT v8.34A (Bruker, 2013)'
_computing_molecular_graphics   'Olex2 (Dolomanov et al., 2009)'
_computing_publication_material 'Olex2 (Dolomanov et al., 2009)'
_computing_structure_refinement 'XL (Sheldrick, 2008)'
_computing_structure_solution   ?
_refine_diff_density_max        0.503
_refine_diff_density_min        -0.294
_refine_diff_density_rms        0.052
_refine_ls_abs_structure_details

```

```
;
```

Flack x determined using 2667 quotients  $[(I^+)-(I^-)]/[(I^+)+(I^-)]$

(Parsons, Flack and Wagner, Acta Cryst. B69 (2013) 249–259).

```
;
_refine_ls_abs_structure_Flack      -0.1(3)
_refine_ls_extinction_coef          .
_refine_ls_extinction_method        none
_refine_ls_goodness_of_fit_ref      1.041
_refine_ls_hydrogen_treatment       constr
_refine_ls_matrix_type              full
_refine_ls_number_parameters        749
_refine_ls_number_reflns            8826
_refine_ls_number_restraints        1
_refine_ls_R_factor_all              0.0700
_refine_ls_R_factor_gt              0.0610
_refine_ls_restrained_S_all         1.041
_refine_ls_shift/su_max              0.000
_refine_ls_shift/su_mean            0.000
_refine_ls_structure_factor_coef     Fsqd
_refine_ls_weighting_details
'w=1/[\s^2^(Fo^2^)+(0.0730P)^2^+1.9154P] where P=(Fo^2^+2Fc^2^)/3'
_refine_ls_weighting_scheme          calc
_refine_ls_wR_factor_gt              0.1597
_refine_ls_wR_factor_ref             0.1668
_refine_special_details              ?
_olex2_refinement_description
;
1. Fixed Uiso
  At 1.2 times of:
    All C(H) groups, {H12D,H12A,H12B} of C12D, All C(H,H) groups
  At 1.5 times of:
    {H1CA,H1CB,H1CC} of C1C, {H16A,H16B,H16C} of C16D, {H1BA,H1BB,H1BC}
of C1B,
    {H1DA,H1DB,H1DC} of C1D, {H15G,H15H,H15I} of C15A, {H1AA,H1AB,H1AC}
of C1A,
    {H15D,H15E,H15F} of C15B, {H15A,H15B,H15C} of C15D, {H15J,H15K,H15L}
of C15C
2. Others

Sof(H12D)=Sof(C13D)=Sof(H13A)=Sof(H13B)=Sof(C15D)=Sof(H15A)=Sof(H15B)=
Sof(H15C)=1-FVAR(1)

Sof(H12A)=Sof(H12B)=Sof(C16D)=Sof(H16A)=Sof(H16B)=Sof(H16C)=Sof(C17D)=
Sof(H17D)=FVAR(1)
3.a Ternary CH refined with riding coordinates:
  C12D(H12D), C17D(H17D), C13B(H13C), C13A(H13D), C13C(H13E)
3.b Secondary CH2 refined with riding coordinates:
  C12D(H12A,H12B), C13D(H13A,H13B), C12B(H12C,H12E), C12A(H12F,H12G),
C12C(H12H,
  H12I)
3.c Aromatic/amide H refined with riding coordinates:
  C6D(H6D), C7D(H7D), C8D(H8D), C9D(H9D), C10D(H10D), C6B(H6B),
```

```

C7B(H7B),
  C8B(H8B), C9B(H9B), C10B(H10B), C6A(H6A), C7A(H7A), C8A(H8A),
C9A(H9A),
  C10A(H10A), C6C(H6C), C7C(H7C), C8C(H8C), C9C(H9C), C10C(H10C)
3.d X=CH2 refined with riding coordinates:
  C3D(H3DA,H3DB), C3B(H3BA,H3BB), C3A(H3AA,H3AB), C3C(H3CA,H3CB)
3.e Idealised Me refined as rotating group:
  C1D(H1DA,H1DB,H1DC), C15D(H15A,H15B,H15C), C16D(H16A,H16B,H16C),
C1B(H1BA,
  H1BB,H1BC), C15B(H15D,H15E,H15F), C1A(H1AA,H1AB,H1AC),
C15A(H15G,H15H,H15I),
  C1C(H1CA,H1CB,H1CC), C15C(H15J,H15K,H15L)
;
_atom_sites_solution_hydrogens      geom
_atom_sites_solution_primary        ?
_atom_sites_solution_secondary      ?
loop_
  _atom_site_label
  _atom_site_type_symbol
  _atom_site_fract_x
  _atom_site_fract_y
  _atom_site_fract_z
  _atom_site_U_iso_or_equiv
  _atom_site_adp_type
  _atom_site_occupancy
  _atom_site_site_symmetry_order
  _atom_site_calc_flag
  _atom_site_refinement_flags_posn
  _atom_site_refinement_flags_adp
  _atom_site_refinement_flags_occupancy
  _atom_site_disorder_assembly
  _atom_site_disorder_group
C1D  C  2.7361(9)  1.7499(3)  1.0756(5)  0.0486(16)  Uani  1  1  d  .  .  .  .  .
H1DA  H  2.6577  1.7519  1.0133  0.073  Uiso  1  1  calc  GR  .  .  .  .
H1DB  H  2.8385  1.7609  1.0661  0.073  Uiso  1  1  calc  GR  .  .  .  .
H1DC  H  2.7066  1.7757  1.1224  0.073  Uiso  1  1  calc  GR  .  .  .  .
C2D  C  2.7442(6)  1.6905(2)  1.1142(4)  0.0296(11)  Uani  1  1  d  .  .  .  .
C3D  C  2.6659(7)  1.6469(3)  1.0646(4)  0.0361(13)  Uani  1  1  d  .  .  .  .
H3DA  H  2.6819  1.6098  1.0907  0.043  Uiso  1  1  calc  R  .  .  .  .
H3DB  H  2.5944  1.6531  1.0034  0.043  Uiso  1  1  calc  R  .  .  .  .
C4D  C  2.8566(6)  1.6819(2)  1.2100(4)  0.0279(11)  Uani  1  1  d  .  .  .  .
C5D  C  2.6442(6)  1.6388(2)  1.2799(3)  0.0256(11)  Uani  1  1  d  .  .  .  .
C6D  C  2.5318(6)  1.6789(3)  1.2851(4)  0.0335(12)  Uani  1  1  d  .  .  .  .
H6D  H  2.5568  1.7180  1.2904  0.040  Uiso  1  1  calc  R  .  .  .  .
C7D  C  2.3816(7)  1.6602(3)  1.2822(4)  0.0428(15)  Uani  1  1  d  .  .  .  .
H7D  H  2.3025  1.6868  1.2858  0.051  Uiso  1  1  calc  R  .  .  .  .
C8D  C  2.3455(7)  1.6033(3)  1.2740(4)  0.0470(17)  Uani  1  1  d  .  .  .  .
H8D  H  2.2416  1.5910  1.2706  0.056  Uiso  1  1  calc  R  .  .  .  .
C9D  C  2.4600(7)  1.5644(3)  1.2709(5)  0.0430(15)  Uani  1  1  d  .  .  .  .
H9D  H  2.4359  1.5252  1.2677  0.052  Uiso  1  1  calc  R  .  .  .  .

```

C10D C 2.6103(7) 1.5820(3) 1.2725(4) 0.0332(12) Uani 1 1 d . . . . .  
 H10D H 2.6889 1.5553 1.2685 0.040 Uiso 1 1 calc R . . . . .  
 C11D C 2.9535(7) 1.6895(3) 1.4414(4) 0.0398(14) Uani 1 1 d . . . . .  
 C12D C 3.0865(7) 1.6635(3) 1.5187(4) 0.0491(17) Uani 1 1 d . . . . .  
 H12D H 3.0566 1.6663 1.5823 0.059 Uiso 0.452(17) 1 calc R . P A 2  
 H12A H 3.0473 1.6483 1.5735 0.059 Uiso 0.548(17) 1 calc R . P A 1  
 H12B H 3.1688 1.6919 1.5443 0.059 Uiso 0.548(17) 1 calc R . P A 1  
 C13D C 3.103(2) 1.6047(10) 1.4997(15) 0.061(6) Uani 0.452(17) 1 d . .  
 P A 2  
 H13A H 3.0524 1.5807 1.5406 0.074 Uiso 0.452(17) 1 calc R . P A 2  
 H13B H 3.2146 1.5938 1.5107 0.074 Uiso 0.452(17) 1 calc R . P A 2  
 C14D C 3.0121(7) 1.6005(4) 1.3844(6) 0.059(2) Uani 1 1 d . . . . .  
 C15D C 3.2279(19) 1.6955(8) 1.5282(12) 0.064(5) Uani 0.452(17) 1  
 d . . P A 2  
 H15A H 3.2530 1.6982 1.4645 0.097 Uiso 0.452(17) 1 calc GR . P A 2  
 H15B H 3.3139 1.6766 1.5744 0.097 Uiso 0.452(17) 1 calc GR . P A 2  
 H15C H 3.2134 1.7335 1.5520 0.097 Uiso 0.452(17) 1 calc GR . P A 2  
 C16D C 3.1995(17) 1.5618(6) 1.5239(10) 0.066(5) Uani 0.548(17) 1  
 d . . P A 1  
 H16A H 3.2902 1.5701 1.5778 0.099 Uiso 0.548(17) 1 calc GR . P A 1  
 H16B H 3.2270 1.5322 1.4826 0.099 Uiso 0.548(17) 1 calc GR . P A 1  
 H16C H 3.1123 1.5489 1.5502 0.099 Uiso 0.548(17) 1 calc GR . P A 1  
 C17D C 3.1519(14) 1.6145(6) 1.4642(9) 0.038(3) Uani 0.548(17) 1 d . .  
 P A 1  
 H17D H 3.2396 1.6285 1.4369 0.046 Uiso 0.548(17) 1 calc R . P A 1  
 N1D N 2.8019(5) 1.6566(2) 1.2823(3) 0.0307(10) Uani 1 1 d . . . . .  
 N2D N 2.9119(5) 1.6475(2) 1.3701(3) 0.0338(11) Uani 1 1 d . . . . .  
 O1D O 2.9941(4) 1.69657(18) 1.2242(3) 0.0381(9) Uani 1 1 d . . . . .  
 O2D O 3.0003(5) 1.5614(2) 1.3287(5) 0.0704(17) Uani 1 1 d . . . . .  
 O3D O 2.8875(6) 1.7336(2) 1.4375(4) 0.0526(12) Uani 1 1 d . . . . .  
 C1B C 3.2275(8) 1.7749(3) 1.0843(4) 0.0400(14) Uani 1 1 d . . . . .  
 H1BA H 3.1617 1.7742 1.0176 0.060 Uiso 1 1 calc GR . . . . .  
 H1BB H 3.1844 1.7489 1.1250 0.060 Uiso 1 1 calc GR . . . . .  
 H1BC H 3.3341 1.7632 1.0840 0.060 Uiso 1 1 calc GR . . . . .  
 C2B C 3.2308(6) 1.8335(2) 1.1244(4) 0.0310(12) Uani 1 1 d . . . . .  
 C3B C 3.1518(7) 1.8768(3) 1.0777(4) 0.0350(13) Uani 1 1 d . . . . .  
 H3BA H 3.0872 1.8719 1.0138 0.042 Uiso 1 1 calc R . . . . .  
 H3BB H 3.1597 1.9129 1.1079 0.042 Uiso 1 1 calc R . . . . .  
 C4B C 3.3450(6) 1.8397(3) 1.2216(4) 0.0334(12) Uani 1 1 d . . . . .  
 C5B C 3.1302(6) 1.8799(3) 1.2922(4) 0.0318(12) Uani 1 1 d . . . . .  
 C6B C 3.0207(7) 1.8389(3) 1.2973(4) 0.0369(13) Uani 1 1 d . . . . .  
 H6B H 3.0500 1.8002 1.3041 0.044 Uiso 1 1 calc R . . . . .  
 C7B C 2.8676(7) 1.8549(3) 1.2925(5) 0.0450(16) Uani 1 1 d . . . . .  
 H7B H 2.7910 1.8271 1.2953 0.054 Uiso 1 1 calc R . . . . .  
 C8B C 2.8267(7) 1.9112(3) 1.2838(5) 0.0442(16) Uani 1 1 d . . . . .  
 H8B H 2.7216 1.9219 1.2803 0.053 Uiso 1 1 calc R . . . . .  
 C9B C 2.9363(7) 1.9521(3) 1.2800(4) 0.0380(13) Uani 1 1 d . . . . .  
 H9B H 2.9066 1.9907 1.2746 0.046 Uiso 1 1 calc R . . . . .  
 C10B C 3.0921(6) 1.9368(2) 1.2841(4) 0.0318(12) Uani 1 1 d . . . . .  
 H10B H 3.1688 1.9646 1.2814 0.038 Uiso 1 1 calc R . . . . .

|      |   |            |             |            |            |      |   |   |      |    |   |   |   |   |
|------|---|------------|-------------|------------|------------|------|---|---|------|----|---|---|---|---|
| C11B | C | 3.4287(11) | 1.8183(5)   | 1.4447(6)  | 0.083(3)   | Uani | 1 | 1 | d    | .  | . | . | . | . |
| C12B | C | 3.5646(14) | 1.8318(6)   | 1.5279(8)  | 0.119(5)   | Uani | 1 | 1 | d    | .  | . | . | . | . |
| H12C | H | 3.6567     | 1.8085      | 1.5251     | 0.143      | Uiso | 1 | 1 | calc | R  | . | . | . | . |
| H12E | H | 3.5379     | 1.8251      | 1.5910     | 0.143      | Uiso | 1 | 1 | calc | R  | . | . | . | . |
| C13B | C | 3.5964(10) | 1.8937(7)   | 1.5148(8)  | 0.112(5)   | Uani | 1 | 1 | d    | .  | . | . | . | . |
| H13C | H | 3.5621     | 1.9158      | 1.5661     | 0.134      | Uiso | 1 | 1 | calc | R  | . | . | . | . |
| C14B | C | 3.4947(9)  | 1.9109(5)   | 1.4142(7)  | 0.071(3)   | Uani | 1 | 1 | d    | .  | . | . | . | . |
| C15B | C | 3.7523(16) | 1.9046(11)  | 1.5219(10) | 0.201(10)  | Uani | 1 | 1 |      |    |   |   |   |   |
| d    | . | .          | .           | .          | .          |      |   |   |      |    |   |   |   |   |
| H15D | H | 3.7660     | 1.9449      | 1.5097     | 0.301      | Uiso | 1 | 1 | calc | GR | . | . | . | . |
| H15E | H | 3.7884     | 1.8820      | 1.4736     | 0.301      | Uiso | 1 | 1 | calc | GR | . | . | . | . |
| H15F | H | 3.8135     | 1.8948      | 1.5874     | 0.301      | Uiso | 1 | 1 | calc | GR | . | . | . | . |
| N1B  | N | 3.2894(5)  | 1.8638(2)   | 1.2951(3)  | 0.0381(12) | Uani | 1 | 1 | d    | .  | . | . | . | . |
| N2B  | N | 3.3956(6)  | 1.8664(3)   | 1.3855(4)  | 0.0508(15) | Uani | 1 | 1 | d    | .  | . | . | . | . |
| O1B  | O | 3.4801(5)  | 1.82406(19) | 1.2360(3)  | 0.0441(10) | Uani | 1 | 1 | d    | .  | . | . | . | . |
| O2B  | O | 3.4936(6)  | 1.9529(3)   | 1.3697(5)  | 0.0776(19) | Uani | 1 | 1 | d    | .  | . | . | . | . |
| O3B  | O | 3.3596(10) | 1.7735(3)   | 1.4285(5)  | 0.102(3)   | Uani | 1 | 1 | d    | .  | . | . | . | . |
| C1A  | C | 2.6771(11) | 1.5714(4)   | 1.5403(5)  | 0.074(3)   | Uani | 1 | 1 | d    | .  | . | . | . | . |
| H1AA | H | 2.6247     | 1.5836      | 1.4742     | 0.111      | Uiso | 1 | 1 | calc | GR | . | . | . | . |
| H1AB | H | 2.6096     | 1.5448      | 1.5641     | 0.111      | Uiso | 1 | 1 | calc | GR | . | . | . | . |
| H1AC | H | 2.7762     | 1.5528      | 1.5394     | 0.111      | Uiso | 1 | 1 | calc | GR | . | . | . | . |
| C2A  | C | 2.7088(7)  | 1.6218(3)   | 1.6063(4)  | 0.0444(16) | Uani | 1 | 1 | d    | .  | . | . | . | . |
| C3A  | C | 2.6654(10) | 1.6735(4)   | 1.5807(6)  | 0.068(2)   | Uani | 1 | 1 | d    | .  | . | . | . | . |
| H3AA | H | 2.6091     | 1.6813      | 1.5158     | 0.082      | Uiso | 1 | 1 | calc | R  | . | . | . | . |
| H3AB | H | 2.6901     | 1.7032      | 1.6270     | 0.082      | Uiso | 1 | 1 | calc | R  | . | . | . | . |
| C4A  | C | 2.8133(7)  | 1.6087(3)   | 1.7048(4)  | 0.0353(13) | Uani | 1 | 1 | d    | .  | . | . | . | . |
| C5A  | C | 2.5925(6)  | 1.6340(2)   | 1.7811(3)  | 0.0270(11) | Uani | 1 | 1 | d    | .  | . | . | . | . |
| C6A  | C | 2.4844(7)  | 1.5912(3)   | 1.7606(4)  | 0.0388(13) | Uani | 1 | 1 | d    | .  | . | . | . | . |
| H6A  | H | 2.5145     | 1.5540      | 1.7474     | 0.047      | Uiso | 1 | 1 | calc | R  | . | . | . | . |
| C7A  | C | 2.3296(7)  | 1.6035(3)   | 1.7595(5)  | 0.0473(17) | Uani | 1 | 1 | d    | .  | . | . | . | . |
| H7A  | H | 2.2533     | 1.5744      | 1.7451     | 0.057      | Uiso | 1 | 1 | calc | R  | . | . | . | . |
| C8A  | C | 2.2858(7)  | 1.6562(3)   | 1.7786(4)  | 0.0467(17) | Uani | 1 | 1 | d    | .  | . | . | . | . |
| H8A  | H | 2.1797     | 1.6636      | 1.7781     | 0.056      | Uiso | 1 | 1 | calc | R  | . | . | . | . |
| C9A  | C | 2.3936(8)  | 1.6986(3)   | 1.7986(5)  | 0.0536(18) | Uani | 1 | 1 | d    | .  | . | . | . | . |
| H9A  | H | 2.3621     | 1.7356      | 1.8118     | 0.064      | Uiso | 1 | 1 | calc | R  | . | . | . | . |
| C10A | C | 2.5482(7)  | 1.6883(3)   | 1.7998(5)  | 0.0408(14) | Uani | 1 | 1 | d    | .  | . | . | . | . |
| H10A | H | 2.6231     | 1.7179      | 1.8133     | 0.049      | Uiso | 1 | 1 | calc | R  | . | . | . | . |
| C11A | C | 2.8717(7)  | 1.5604(3)   | 1.9206(5)  | 0.0375(13) | Uani | 1 | 1 | d    | .  | . | . | . | . |
| C12A | C | 2.9951(8)  | 1.5662(3)   | 2.0153(5)  | 0.0501(17) | Uani | 1 | 1 | d    | .  | . | . | . | . |
| H12F | H | 3.0792     | 1.5379      | 2.0194     | 0.060      | Uiso | 1 | 1 | calc | R  | . | . | . | . |
| H12G | H | 2.9486     | 1.5612      | 2.0719     | 0.060      | Uiso | 1 | 1 | calc | R  | . | . | . | . |
| C13A | C | 3.0591(6)  | 1.6266(3)   | 2.0126(4)  | 0.0375(13) | Uani | 1 | 1 | d    | .  | . | . | . | . |
| H13D | H | 3.0449     | 1.6480      | 2.0708     | 0.045      | Uiso | 1 | 1 | calc | R  | . | . | . | . |
| C14A | C | 2.9612(6)  | 1.6540(3)   | 1.9213(4)  | 0.0333(13) | Uani | 1 | 1 | d    | .  | . | . | . | . |
| C15A | C | 3.2315(7)  | 1.6270(3)   | 2.0119(5)  | 0.0497(15) | Uani | 1 | 1 | d    | .  | . | . | . | . |
| H15G | H | 3.2478     | 1.6030      | 1.9589     | 0.075      | Uiso | 1 | 1 | calc | GR | . | . | . | . |
| H15H | H | 3.2939     | 1.6127      | 2.0743     | 0.075      | Uiso | 1 | 1 | calc | GR | . | . | . | . |
| H15I | H | 3.2640     | 1.6658      | 2.0021     | 0.075      | Uiso | 1 | 1 | calc | GR | . | . | . | . |
| N1A  | N | 2.7544(5)  | 1.6229(2)   | 1.7838(3)  | 0.0282(10) | Uani | 1 | 1 | d    | .  | . | . | . | . |
| N2A  | N | 2.8542(5)  | 1.61352(19) | 1.8758(3)  | 0.0284(10) | Uani | 1 | 1 | d    | .  | . | . | . | . |

01A O 2.9446(5) 1.5887(2) 1.7166(3) 0.0435(10) Uani 1 1 d . . . . .  
 02A O 2.9723(5) 1.70026(18) 1.8903(3) 0.0422(10) Uani 1 1 d . . . . .  
 03A O 2.7970(5) 1.51970(19) 1.8865(3) 0.0427(10) Uani 1 1 d . . . . .  
 C1C C 2.8403(9) 1.4418(4) 1.4486(5) 0.065(2) Uani 1 1 d . . . . .  
 H1CA H 2.7411 1.4560 1.4591 0.097 Uiso 1 1 calc GR . . . . .  
 H1CB H 2.8937 1.4722 1.4225 0.097 Uiso 1 1 calc GR . . . . .  
 H1CC H 2.9068 1.4287 1.5107 0.097 Uiso 1 1 calc GR . . . . .  
 C2C C 2.8088(7) 1.3943(3) 1.3784(4) 0.0419(15) Uani 1 1 d . . . . .  
 C3C C 2.8587(9) 1.3414(4) 1.3999(5) 0.063(2) Uani 1 1 d . . . . .  
 H3CA H 2.9183 1.3325 1.4636 0.076 Uiso 1 1 calc R . . . . .  
 H3CB H 2.8345 1.3128 1.3515 0.076 Uiso 1 1 calc R . . . . .  
 C4C C 2.7043(7) 1.4075(2) 1.2816(4) 0.0332(12) Uani 1 1 d . . . . .  
 C5C C 2.9236(6) 1.3864(2) 1.2010(4) 0.0277(11) Uani 1 1 d . . . . .  
 C6C C 2.9707(7) 1.3337(3) 1.1797(4) 0.0385(13) Uani 1 1 d . . . . .  
 H6C H 2.8984 1.3032 1.1679 0.046 Uiso 1 1 calc R . . . . .  
 C7C C 3.1247(7) 1.3253(3) 1.1755(5) 0.0540(18) Uani 1 1 d . . . . .  
 H7C H 3.1578 1.2891 1.1595 0.065 Uiso 1 1 calc R . . . . .  
 C8C C 3.2292(7) 1.3692(3) 1.1943(6) 0.057(2) Uani 1 1 d . . . . .  
 H8C H 3.3352 1.3630 1.1931 0.069 Uiso 1 1 calc R . . . . .  
 C9C C 3.1815(7) 1.4227(3) 1.2152(6) 0.0534(18) Uani 1 1 d . . . . .  
 H9C H 3.2539 1.4531 1.2269 0.064 Uiso 1 1 calc R . . . . .  
 C10C C 3.0251(7) 1.4315(3) 1.2190(5) 0.0383(14) Uani 1 1 d . . . . .  
 H10C H 2.9904 1.4677 1.2336 0.046 Uiso 1 1 calc R . . . . .  
 C11C C 2.5524(7) 1.3642(3) 1.0648(4) 0.0354(13) Uani 1 1 d . . . . .  
 C12C C 2.4531(7) 1.3909(3) 0.9750(4) 0.0394(14) Uani 1 1 d . . . . .  
 H12H H 2.3419 1.3915 0.9776 0.047 Uiso 1 1 calc R . . . . .  
 H12I H 2.4622 1.3700 0.9161 0.047 Uiso 1 1 calc R . . . . .  
 C13C C 2.5167(7) 1.4518(3) 0.9736(4) 0.0370(13) Uani 1 1 d . . . . .  
 H13E H 2.5677 1.4556 0.9181 0.044 Uiso 1 1 calc R . . . . .  
 C14C C 2.6394(6) 1.4578(3) 1.0684(4) 0.0327(12) Uani 1 1 d . . . . .  
 C15C C 2.3936(8) 1.4967(3) 0.9652(5) 0.0588(19) Uani 1 1 d . . . . .  
 H15J H 2.3454 1.4938 1.0206 0.088 Uiso 1 1 calc GR . . . . .  
 H15K H 2.3133 1.4915 0.9044 0.088 Uiso 1 1 calc GR . . . . .  
 H15L H 2.4418 1.5340 0.9653 0.088 Uiso 1 1 calc GR . . . . .  
 N1C N 2.7621(5) 1.3957(2) 1.2023(3) 0.0293(10) Uani 1 1 d . . . . .  
 N2C N 2.6604(5) 1.4050(2) 1.1120(3) 0.0288(10) Uani 1 1 d . . . . .  
 O1C O 2.5732(5) 1.4260(2) 1.2735(3) 0.0441(11) Uani 1 1 d . . . . .  
 O2C O 2.7117(5) 1.49948(18) 1.1029(3) 0.0397(10) Uani 1 1 d . . . . .  
 O3C O 2.5492(5) 1.31684(19) 1.0952(3) 0.0522(12) Uani 1 1 d . . . . .

loop\_

\_atom\_site\_aniso\_label  
 \_atom\_site\_aniso\_U\_11  
 \_atom\_site\_aniso\_U\_22  
 \_atom\_site\_aniso\_U\_33  
 \_atom\_site\_aniso\_U\_23  
 \_atom\_site\_aniso\_U\_13  
 \_atom\_site\_aniso\_U\_12  
 C1D 0.063(4) 0.034(3) 0.047(4) 0.009(3) 0.009(3) 0.011(3)  
 C2D 0.026(2) 0.036(3) 0.031(3) 0.001(2) 0.014(2) 0.001(2)

C3D 0.037(3) 0.045(3) 0.026(3) 0.004(2) 0.008(2) -0.001(3)  
C4D 0.032(3) 0.025(3) 0.029(3) -0.002(2) 0.012(2) 0.001(2)  
C5D 0.021(2) 0.036(3) 0.019(2) -0.001(2) 0.0039(18) -0.003(2)  
C6D 0.034(3) 0.042(3) 0.026(3) 0.006(2) 0.009(2) 0.002(3)  
C7D 0.025(3) 0.070(5) 0.035(3) 0.006(3) 0.011(2) 0.005(3)  
C8D 0.030(3) 0.074(5) 0.037(3) 0.000(3) 0.006(2) -0.011(3)  
C9D 0.038(3) 0.053(4) 0.038(3) -0.001(3) 0.008(3) -0.015(3)  
C10D 0.034(3) 0.040(3) 0.026(3) 0.001(2) 0.009(2) -0.004(3)  
C11D 0.041(3) 0.050(4) 0.031(3) -0.003(3) 0.014(3) -0.008(3)  
C12D 0.037(3) 0.079(5) 0.027(3) -0.005(3) -0.001(2) -0.010(3)  
C13D 0.038(10) 0.104(16) 0.040(10) 0.002(10) 0.005(8) 0.011(10)  
C14D 0.025(3) 0.083(6) 0.058(4) -0.004(4) -0.010(3) 0.006(3)  
C15D 0.062(10) 0.073(11) 0.050(9) -0.008(8) -0.002(7) -0.015(8)  
C16D 0.068(9) 0.065(9) 0.051(8) 0.002(6) -0.013(6) 0.024(7)  
C17D 0.020(6) 0.068(8) 0.024(6) -0.002(5) 0.000(4) 0.005(5)  
N1D 0.022(2) 0.045(3) 0.023(2) -0.0017(19) 0.0033(17) -0.0045(19)  
N2D 0.028(2) 0.046(3) 0.025(2) -0.003(2) 0.0021(18) 0.000(2)  
O1D 0.0279(19) 0.042(2) 0.046(2) 0.0022(19) 0.0117(17) -0.0073(17)  
O2D 0.037(2) 0.069(3) 0.095(4) -0.031(3) -0.003(3) 0.010(2)  
O3D 0.058(3) 0.055(3) 0.046(3) -0.013(2) 0.015(2) -0.013(2)  
C1B 0.052(4) 0.036(3) 0.032(3) -0.003(2) 0.010(3) -0.006(3)  
C2B 0.038(3) 0.027(3) 0.033(3) 0.000(2) 0.017(2) -0.010(2)  
C3B 0.041(3) 0.036(3) 0.030(3) -0.004(2) 0.012(2) -0.005(3)  
C4B 0.028(3) 0.035(3) 0.039(3) -0.005(2) 0.010(2) 0.001(2)  
C5B 0.029(3) 0.044(3) 0.022(2) 0.001(2) 0.005(2) 0.004(2)  
C6B 0.040(3) 0.036(3) 0.034(3) -0.001(2) 0.009(2) -0.003(3)  
C7B 0.040(3) 0.053(4) 0.046(3) -0.012(3) 0.017(3) -0.016(3)  
C8B 0.027(3) 0.061(4) 0.044(3) -0.003(3) 0.007(2) 0.005(3)  
C9B 0.036(3) 0.045(3) 0.032(3) 0.000(3) 0.005(2) 0.010(3)  
C10B 0.032(3) 0.033(3) 0.030(3) 0.001(2) 0.006(2) 0.001(2)  
C11B 0.077(6) 0.110(8) 0.046(4) -0.008(5) -0.016(4) 0.065(6)  
C12B 0.107(9) 0.134(11) 0.082(7) -0.009(7) -0.045(6) 0.058(8)  
C13B 0.040(5) 0.200(14) 0.073(6) -0.061(8) -0.029(4) 0.024(7)  
C14B 0.035(4) 0.095(7) 0.077(6) -0.042(6) 0.002(4) 0.010(4)  
C15B 0.101(10) 0.40(3) 0.088(9) -0.018(15) 0.000(8) -0.033(14)  
N1B 0.029(2) 0.050(3) 0.031(2) -0.010(2) 0.0001(19) 0.009(2)  
N2B 0.037(3) 0.066(4) 0.039(3) -0.017(3) -0.009(2) 0.016(3)  
O1B 0.030(2) 0.048(3) 0.054(3) -0.013(2) 0.0101(18) 0.0049(19)  
O2B 0.037(3) 0.100(5) 0.095(5) -0.040(4) 0.013(3) -0.015(3)  
O3B 0.153(7) 0.073(5) 0.064(4) 0.005(3) -0.007(4) 0.059(5)  
C1A 0.084(6) 0.096(7) 0.041(4) -0.020(4) 0.014(4) -0.026(5)  
C2A 0.039(3) 0.073(5) 0.025(3) 0.002(3) 0.016(2) -0.009(3)  
C3A 0.081(5) 0.082(6) 0.045(4) 0.025(4) 0.020(4) 0.000(5)  
C4A 0.034(3) 0.041(3) 0.032(3) -0.004(2) 0.011(2) -0.006(3)  
C5A 0.024(2) 0.036(3) 0.020(2) 0.000(2) 0.0042(18) -0.004(2)  
C6A 0.037(3) 0.040(3) 0.038(3) 0.001(3) 0.007(2) -0.006(3)  
C7A 0.028(3) 0.058(4) 0.054(4) 0.015(3) 0.007(3) -0.013(3)  
C8A 0.030(3) 0.081(5) 0.029(3) 0.005(3) 0.007(2) 0.007(3)  
C9A 0.044(4) 0.055(4) 0.051(4) -0.021(3) -0.008(3) 0.016(3)  
C10A 0.037(3) 0.040(3) 0.041(3) -0.009(3) 0.001(2) 0.000(3)

```

C11A 0.041(3) 0.027(3) 0.043(3) -0.007(3) 0.008(3) 0.004(3)
C12A 0.045(4) 0.046(4) 0.052(4) 0.013(3) -0.001(3) 0.004(3)
C13A 0.027(3) 0.043(3) 0.039(3) -0.006(3) 0.000(2) 0.002(3)
C14A 0.025(3) 0.037(3) 0.036(3) -0.011(3) 0.005(2) 0.001(2)
C15A 0.039(3) 0.067(4) 0.041(3) 0.001(3) 0.004(2) 0.003(3)
N1A 0.023(2) 0.036(2) 0.025(2) -0.0015(19) 0.0046(17) -0.0024(19)
N2A 0.026(2) 0.028(2) 0.030(2) -0.0022(18) 0.0043(18) 0.0006(18)
O1A 0.033(2) 0.055(3) 0.047(2) -0.004(2) 0.0187(18) 0.0016(19)
O2A 0.039(2) 0.035(2) 0.050(2) -0.003(2) 0.0064(19) -0.0097(19)
O3A 0.050(2) 0.034(2) 0.045(2) -0.0036(19) 0.015(2) -0.001(2)
C1C 0.068(5) 0.094(6) 0.030(3) -0.016(4) 0.008(3) -0.011(4)
C2C 0.044(3) 0.055(4) 0.030(3) 0.004(3) 0.013(2) -0.012(3)
C3C 0.075(5) 0.077(6) 0.031(3) 0.018(3) -0.001(3) -0.007(4)
C4C 0.036(3) 0.034(3) 0.032(3) 0.002(2) 0.011(2) -0.008(2)
C5C 0.026(3) 0.032(3) 0.023(2) 0.000(2) 0.003(2) 0.003(2)
C6C 0.028(3) 0.035(3) 0.045(3) -0.004(3) -0.003(2) 0.001(2)
C7C 0.032(3) 0.053(4) 0.071(5) -0.012(4) 0.000(3) 0.014(3)
C8C 0.025(3) 0.071(5) 0.073(5) -0.020(4) 0.007(3) 0.004(3)
C9C 0.031(3) 0.049(4) 0.077(5) -0.008(3) 0.007(3) -0.013(3)
C10C 0.031(3) 0.032(3) 0.050(3) -0.007(3) 0.006(3) -0.005(2)
C11C 0.030(3) 0.036(3) 0.037(3) 0.001(3) 0.003(2) 0.000(2)
C12C 0.033(3) 0.046(4) 0.035(3) 0.000(3) 0.001(2) 0.001(3)
C13C 0.039(3) 0.038(3) 0.033(3) 0.002(3) 0.007(2) 0.002(3)
C14C 0.030(3) 0.033(3) 0.035(3) 0.004(3) 0.007(2) 0.003(3)
C15C 0.060(4) 0.049(4) 0.055(4) 0.003(3) -0.010(3) 0.019(3)
N1C 0.026(2) 0.035(3) 0.025(2) 0.0045(19) 0.0021(17) -0.0019(19)
N2C 0.025(2) 0.036(3) 0.023(2) 0.0031(18) 0.0000(17) 0.0000(19)
O1C 0.036(2) 0.056(3) 0.045(2) -0.003(2) 0.0188(18) 0.002(2)
O2C 0.047(2) 0.034(2) 0.036(2) -0.0004(18) 0.0072(18) 0.000(2)
O3C 0.049(3) 0.040(3) 0.055(3) 0.007(2) -0.011(2) -0.009(2)

```

\_geom\_special\_details

;

All esds (except the esd in the dihedral angle between two l.s. planes)

are estimated using the full covariance matrix. The cell esds are taken

into account individually in the estimation of esds in distances, angles

and torsion angles; correlations between esds in cell parameters are only

used when they are defined by crystal symmetry. An approximate (isotropic)

treatment of cell esds is used for estimating esds involving l.s. planes.

;

loop\_

\_geom\_bond\_atom\_site\_label\_1

\_geom\_bond\_atom\_site\_label\_2

\_geom\_bond\_distance



```

_geom_bond_site_symmetry_2
_geom_bond_publ_flag
C1D H1DA 0.9800 . ?
C1D H1DB 0.9800 . ?
C1D H1DC 0.9800 . ?
C1D C2D 1.504(8) . ?
C2D C3D 1.341(8) . ?
C2D C4D 1.484(7) . ?
C3D H3DA 0.9500 . ?
C3D H3DB 0.9500 . ?
C4D N1D 1.371(7) . ?
C4D O1D 1.228(6) . ?
C5D C6D 1.388(8) . ?
C5D C10D 1.374(8) . ?
C5D N1D 1.444(6) . ?
C6D H6D 0.9500 . ?
C6D C7D 1.386(8) . ?
C7D H7D 0.9500 . ?
C7D C8D 1.382(10) . ?
C8D H8D 0.9500 . ?
C8D C9D 1.374(10) . ?
C9D H9D 0.9500 . ?
C9D C10D 1.383(8) . ?
C10D H10D 0.9500 . ?
C11D C12D 1.524(9) . ?
C11D N2D 1.400(8) . ?
C11D O3D 1.188(9) . ?
C12D H12D 1.0000 . ?
C12D H12A 0.9900 . ?
C12D H12B 0.9900 . ?
C12D C13D 1.43(2) . ?
C12D C15D 1.436(17) . ?
C12D C17D 1.577(15) . ?
C13D H13A 0.9900 . ?
C13D H13B 0.9900 . ?
C13D C14D 1.637(19) . ?
C14D C17D 1.491(12) . ?
C14D N2D 1.402(9) . ?
C14D O2D 1.203(10) . ?
C15D H15A 0.9800 . ?
C15D H15B 0.9800 . ?
C15D H15C 0.9800 . ?
C16D H16A 0.9800 . ?
C16D H16B 0.9800 . ?
C16D H16C 0.9800 . ?
C16D C17D 1.508(19) . ?
C17D H17D 1.0000 . ?
N1D N2D 1.393(6) . ?
C1B H1BA 0.9800 . ?
C1B H1BB 0.9800 . ?

```

C1B H1BC 0.9800 . ?  
C1B C2B 1.496(8) . ?  
C2B C3B 1.323(8) . ?  
C2B C4B 1.500(8) . ?  
C3B H3BA 0.9500 . ?  
C3B H3BB 0.9500 . ?  
C4B N1B 1.376(7) . ?  
C4B O1B 1.215(7) . ?  
C5B C6B 1.382(9) . ?  
C5B C10B 1.387(8) . ?  
C5B N1B 1.444(7) . ?  
C6B H6B 0.9500 . ?  
C6B C7B 1.386(9) . ?  
C7B H7B 0.9500 . ?  
C7B C8B 1.377(10) . ?  
C8B H8B 0.9500 . ?  
C8B C9B 1.378(10) . ?  
C9B H9B 0.9500 . ?  
C9B C10B 1.407(8) . ?  
C10B H10B 0.9500 . ?  
C11B C12B 1.494(13) . ?  
C11B N2B 1.402(12) . ?  
C11B O3B 1.217(13) . ?  
C12B H12C 0.9900 . ?  
C12B H12E 0.9900 . ?  
C12B C13B 1.512(19) . ?  
C13B H13C 1.0000 . ?  
C13B C14B 1.540(14) . ?  
C13B C15B 1.376(17) . ?  
C14B N2B 1.365(11) . ?  
C14B O2B 1.174(12) . ?  
C15B H15D 0.9800 . ?  
C15B H15E 0.9800 . ?  
C15B H15F 0.9800 . ?  
N1B N2B 1.389(7) . ?  
C1A H1AA 0.9800 . ?  
C1A H1AB 0.9800 . ?  
C1A H1AC 0.9800 . ?  
C1A C2A 1.499(11) . ?  
C2A C3A 1.306(12) . ?  
C2A C4A 1.503(8) . ?  
C3A H3AA 0.9500 . ?  
C3A H3AB 0.9500 . ?  
C4A N1A 1.383(7) . ?  
C4A O1A 1.223(7) . ?  
C5A C6A 1.373(8) . ?  
C5A C10A 1.386(8) . ?  
C5A N1A 1.441(7) . ?  
C6A H6A 0.9500 . ?  
C6A C7A 1.391(9) . ?

C7A H7A 0.9500 . ?  
C7A C8A 1.351(10) . ?  
C8A H8A 0.9500 . ?  
C8A C9A 1.364(11) . ?  
C9A H9A 0.9500 . ?  
C9A C10A 1.379(9) . ?  
C10A H10A 0.9500 . ?  
C11A C12A 1.512(9) . ?  
C11A N2A 1.400(8) . ?  
C11A O3A 1.199(7) . ?  
C12A H12F 0.9900 . ?  
C12A H12G 0.9900 . ?  
C12A C13A 1.542(10) . ?  
C13A H13D 1.0000 . ?  
C13A C14A 1.513(8) . ?  
C13A C15A 1.521(8) . ?  
C14A N2A 1.388(7) . ?  
C14A O2A 1.191(8) . ?  
C15A H15G 0.9800 . ?  
C15A H15H 0.9800 . ?  
C15A H15I 0.9800 . ?  
N1A N2A 1.400(6) . ?  
C1C H1CA 0.9800 . ?  
C1C H1CB 0.9800 . ?  
C1C H1CC 0.9800 . ?  
C1C C2C 1.481(10) . ?  
C2C C3C 1.336(11) . ?  
C2C C4C 1.486(8) . ?  
C3C H3CA 0.9500 . ?  
C3C H3CB 0.9500 . ?  
C4C N1C 1.369(7) . ?  
C4C O1C 1.214(7) . ?  
C5C C6C 1.372(8) . ?  
C5C C10C 1.375(8) . ?  
C5C N1C 1.444(7) . ?  
C6C H6C 0.9500 . ?  
C6C C7C 1.387(9) . ?  
C7C H7C 0.9500 . ?  
C7C C8C 1.371(11) . ?  
C8C H8C 0.9500 . ?  
C8C C9C 1.387(10) . ?  
C9C H9C 0.9500 . ?  
C9C C10C 1.407(9) . ?  
C10C H10C 0.9500 . ?  
C11C C12C 1.495(8) . ?  
C11C N2C 1.404(8) . ?  
C11C O3C 1.205(8) . ?  
C12C H12H 0.9900 . ?  
C12C H12I 0.9900 . ?  
C12C C13C 1.547(9) . ?

C13C H13E 1.0000 . ?  
 C13C C14C 1.511(7) . ?  
 C13C C15C 1.502(9) . ?  
 C14C N2C 1.386(7) . ?  
 C14C O2C 1.210(7) . ?  
 C15C H15J 0.9800 . ?  
 C15C H15K 0.9800 . ?  
 C15C H15L 0.9800 . ?  
 N1C N2C 1.388(6) . ?

loop\_

\_geom\_angle\_atom\_site\_label\_1  
 \_geom\_angle\_atom\_site\_label\_2  
 \_geom\_angle\_atom\_site\_label\_3  
 \_geom\_angle  
 \_geom\_angle\_site\_symmetry\_1  
 \_geom\_angle\_site\_symmetry\_3  
 \_geom\_angle\_publ\_flag  
 H1DA C1D H1DB 109.5 . . ?  
 H1DA C1D H1DC 109.5 . . ?  
 H1DB C1D H1DC 109.5 . . ?  
 C2D C1D H1DA 109.5 . . ?  
 C2D C1D H1DB 109.5 . . ?  
 C2D C1D H1DC 109.5 . . ?  
 C3D C2D C1D 123.8(5) . . ?  
 C3D C2D C4D 121.1(5) . . ?  
 C4D C2D C1D 114.9(5) . . ?  
 C2D C3D H3DA 120.0 . . ?  
 C2D C3D H3DB 120.0 . . ?  
 H3DA C3D H3DB 120.0 . . ?  
 N1D C4D C2D 117.6(4) . . ?  
 O1D C4D C2D 121.5(5) . . ?  
 O1D C4D N1D 120.8(5) . . ?  
 C6D C5D N1D 119.6(5) . . ?  
 C10D C5D C6D 121.9(5) . . ?  
 C10D C5D N1D 118.5(5) . . ?  
 C5D C6D H6D 121.1 . . ?  
 C7D C6D C5D 117.8(6) . . ?  
 C7D C6D H6D 121.1 . . ?  
 C6D C7D H7D 119.6 . . ?  
 C8D C7D C6D 120.9(6) . . ?  
 C8D C7D H7D 119.6 . . ?  
 C7D C8D H8D 120.0 . . ?  
 C9D C8D C7D 120.0(6) . . ?  
 C9D C8D H8D 120.0 . . ?  
 C8D C9D H9D 119.9 . . ?  
 C8D C9D C10D 120.3(6) . . ?  
 C10D C9D H9D 119.9 . . ?  
 C5D C10D C9D 119.1(6) . . ?  
 C5D C10D H10D 120.4 . . ?

C9D C10D H10D 120.4 . . ?  
 N2D C11D C12D 104.5(6) . . ?  
 O3D C11D C12D 132.0(6) . . ?  
 O3D C11D N2D 123.4(6) . . ?  
 C11D C12D H12D 107.1 . . ?  
 C11D C12D H12A 110.8 . . ?  
 C11D C12D H12B 110.8 . . ?  
 C11D C12D C17D 104.7(6) . . ?  
 H12A C12D H12B 108.9 . . ?  
 C13D C12D C11D 110.7(9) . . ?  
 C13D C12D H12D 107.1 . . ?  
 C13D C12D C15D 113.8(13) . . ?  
 C15D C12D C11D 110.6(9) . . ?  
 C15D C12D H12D 107.1 . . ?  
 C17D C12D H12A 110.8 . . ?  
 C17D C12D H12B 110.8 . . ?  
 C12D C13D H13A 111.5 . . ?  
 C12D C13D H13B 111.5 . . ?  
 C12D C13D C14D 101.4(13) . . ?  
 H13A C13D H13B 109.3 . . ?  
 C14D C13D H13A 111.5 . . ?  
 C14D C13D H13B 111.5 . . ?  
 N2D C14D C13D 103.5(10) . . ?  
 N2D C14D C17D 107.9(8) . . ?  
 O2D C14D C13D 130.0(11) . . ?  
 O2D C14D C17D 126.2(8) . . ?  
 O2D C14D N2D 124.3(6) . . ?  
 C12D C15D H15A 109.5 . . ?  
 C12D C15D H15B 109.5 . . ?  
 C12D C15D H15C 109.5 . . ?  
 H15A C15D H15B 109.5 . . ?  
 H15A C15D H15C 109.5 . . ?  
 H15B C15D H15C 109.5 . . ?  
 H16A C16D H16B 109.5 . . ?  
 H16A C16D H16C 109.5 . . ?  
 H16B C16D H16C 109.5 . . ?  
 C17D C16D H16A 109.5 . . ?  
 C17D C16D H16B 109.5 . . ?  
 C17D C16D H16C 109.5 . . ?  
 C12D C17D H17D 110.8 . . ?  
 C14D C17D C12D 101.6(8) . . ?  
 C14D C17D C16D 107.8(11) . . ?  
 C14D C17D H17D 110.8 . . ?  
 C16D C17D C12D 114.7(12) . . ?  
 C16D C17D H17D 110.8 . . ?  
 C4D N1D C5D 128.4(4) . . ?  
 C4D N1D N2D 116.0(4) . . ?  
 N2D N1D C5D 115.6(4) . . ?  
 C11D N2D C14D 114.5(5) . . ?  
 N1D N2D C11D 122.4(5) . . ?

N1D N2D C14D 121.8(5) . . ?  
 H1BA C1B H1BB 109.5 . . ?  
 H1BA C1B H1BC 109.5 . . ?  
 H1BB C1B H1BC 109.5 . . ?  
 C2B C1B H1BA 109.5 . . ?  
 C2B C1B H1BB 109.5 . . ?  
 C2B C1B H1BC 109.5 . . ?  
 C1B C2B C4B 112.7(5) . . ?  
 C3B C2B C1B 124.7(5) . . ?  
 C3B C2B C4B 122.4(5) . . ?  
 C2B C3B H3BA 120.0 . . ?  
 C2B C3B H3BB 120.0 . . ?  
 H3BA C3B H3BB 120.0 . . ?  
 N1B C4B C2B 116.8(5) . . ?  
 O1B C4B C2B 122.3(5) . . ?  
 O1B C4B N1B 120.9(5) . . ?  
 C6B C5B C10B 121.8(5) . . ?  
 C6B C5B N1B 120.0(6) . . ?  
 C10B C5B N1B 118.2(5) . . ?  
 C5B C6B H6B 120.3 . . ?  
 C5B C6B C7B 119.3(6) . . ?  
 C7B C6B H6B 120.3 . . ?  
 C6B C7B H7B 120.1 . . ?  
 C8B C7B C6B 119.9(6) . . ?  
 C8B C7B H7B 120.1 . . ?  
 C7B C8B H8B 119.6 . . ?  
 C7B C8B C9B 120.8(6) . . ?  
 C9B C8B H8B 119.6 . . ?  
 C8B C9B H9B 119.9 . . ?  
 C8B C9B C10B 120.3(6) . . ?  
 C10B C9B H9B 119.9 . . ?  
 C5B C10B C9B 117.8(6) . . ?  
 C5B C10B H10B 121.1 . . ?  
 C9B C10B H10B 121.1 . . ?  
 N2B C11B C12B 107.9(11) . . ?  
 O3B C11B C12B 127.0(10) . . ?  
 O3B C11B N2B 125.0(7) . . ?  
 C11B C12B H12C 110.9 . . ?  
 C11B C12B H12E 110.9 . . ?  
 C11B C12B C13B 104.3(9) . . ?  
 H12C C12B H12E 108.9 . . ?  
 C13B C12B H12C 110.9 . . ?  
 C13B C12B H12E 110.9 . . ?  
 C12B C13B H13C 108.7 . . ?  
 C12B C13B C14B 106.6(8) . . ?  
 C14B C13B H13C 108.7 . . ?  
 C15B C13B C12B 112.7(15) . . ?  
 C15B C13B H13C 108.7 . . ?  
 C15B C13B C14B 111.3(13) . . ?  
 N2B C14B C13B 104.9(10) . . ?

02B C14B C13B 130.3(10) . . ?  
 02B C14B N2B 124.8(8) . . ?  
 C13B C15B H15D 109.5 . . ?  
 C13B C15B H15E 109.5 . . ?  
 C13B C15B H15F 109.5 . . ?  
 H15D C15B H15E 109.5 . . ?  
 H15D C15B H15F 109.5 . . ?  
 H15E C15B H15F 109.5 . . ?  
 C4B N1B C5B 127.6(5) . . ?  
 C4B N1B N2B 115.5(5) . . ?  
 N2B N1B C5B 116.5(5) . . ?  
 C14B N2B C11B 115.1(7) . . ?  
 C14B N2B N1B 123.2(7) . . ?  
 N1B N2B C11B 120.6(7) . . ?  
 H1AA C1A H1AB 109.5 . . ?  
 H1AA C1A H1AC 109.5 . . ?  
 H1AB C1A H1AC 109.5 . . ?  
 C2A C1A H1AA 109.5 . . ?  
 C2A C1A H1AB 109.5 . . ?  
 C2A C1A H1AC 109.5 . . ?  
 C1A C2A C4A 113.1(6) . . ?  
 C3A C2A C1A 125.1(7) . . ?  
 C3A C2A C4A 121.5(7) . . ?  
 C2A C3A H3AA 120.0 . . ?  
 C2A C3A H3AB 120.0 . . ?  
 H3AA C3A H3AB 120.0 . . ?  
 N1A C4A C2A 115.7(5) . . ?  
 01A C4A C2A 123.4(5) . . ?  
 01A C4A N1A 120.9(5) . . ?  
 C6A C5A C10A 120.7(5) . . ?  
 C6A C5A N1A 120.2(5) . . ?  
 C10A C5A N1A 119.2(5) . . ?  
 C5A C6A H6A 120.8 . . ?  
 C5A C6A C7A 118.4(6) . . ?  
 C7A C6A H6A 120.8 . . ?  
 C6A C7A H7A 119.4 . . ?  
 C8A C7A C6A 121.2(6) . . ?  
 C8A C7A H7A 119.4 . . ?  
 C7A C8A H8A 119.9 . . ?  
 C7A C8A C9A 120.2(6) . . ?  
 C9A C8A H8A 119.9 . . ?  
 C8A C9A H9A 119.8 . . ?  
 C8A C9A C10A 120.4(7) . . ?  
 C10A C9A H9A 119.8 . . ?  
 C5A C10A H10A 120.5 . . ?  
 C9A C10A C5A 119.1(6) . . ?  
 C9A C10A H10A 120.5 . . ?  
 N2A C11A C12A 107.2(5) . . ?  
 03A C11A C12A 129.4(6) . . ?  
 03A C11A N2A 123.3(6) . . ?

C11A C12A H12F 110.9 . . ?  
 C11A C12A H12G 110.9 . . ?  
 C11A C12A C13A 104.5(5) . . ?  
 H12F C12A H12G 108.9 . . ?  
 C13A C12A H12F 110.9 . . ?  
 C13A C12A H12G 110.9 . . ?  
 C12A C13A H13D 109.1 . . ?  
 C14A C13A C12A 106.5(5) . . ?  
 C14A C13A H13D 109.1 . . ?  
 C14A C13A C15A 110.8(5) . . ?  
 C15A C13A C12A 112.2(5) . . ?  
 C15A C13A H13D 109.1 . . ?  
 N2A C14A C13A 106.4(5) . . ?  
 O2A C14A C13A 128.8(6) . . ?  
 O2A C14A N2A 124.8(5) . . ?  
 C13A C15A H15G 109.5 . . ?  
 C13A C15A H15H 109.5 . . ?  
 C13A C15A H15I 109.5 . . ?  
 H15G C15A H15H 109.5 . . ?  
 H15G C15A H15I 109.5 . . ?  
 H15H C15A H15I 109.5 . . ?  
 C4A N1A C5A 125.9(4) . . ?  
 C4A N1A N2A 116.0(4) . . ?  
 N2A N1A C5A 116.6(4) . . ?  
 C14A N2A C11A 115.0(5) . . ?  
 C14A N2A N1A 121.6(5) . . ?  
 N1A N2A C11A 122.6(5) . . ?  
 H1CA C1C H1CB 109.5 . . ?  
 H1CA C1C H1CC 109.5 . . ?  
 H1CB C1C H1CC 109.5 . . ?  
 C2C C1C H1CA 109.5 . . ?  
 C2C C1C H1CB 109.5 . . ?  
 C2C C1C H1CC 109.5 . . ?  
 C1C C2C C4C 115.6(6) . . ?  
 C3C C2C C1C 124.1(6) . . ?  
 C3C C2C C4C 120.1(6) . . ?  
 C2C C3C H3CA 120.0 . . ?  
 C2C C3C H3CB 120.0 . . ?  
 H3CA C3C H3CB 120.0 . . ?  
 N1C C4C C2C 116.3(5) . . ?  
 O1C C4C C2C 121.6(6) . . ?  
 O1C C4C N1C 122.1(5) . . ?  
 C6C C5C C10C 121.9(5) . . ?  
 C6C C5C N1C 119.5(5) . . ?  
 C10C C5C N1C 118.6(5) . . ?  
 C5C C6C H6C 120.3 . . ?  
 C5C C6C C7C 119.4(6) . . ?  
 C7C C6C H6C 120.3 . . ?  
 C6C C7C H7C 120.0 . . ?  
 C8C C7C C6C 120.0(7) . . ?



C8C C7C H7C 120.0 . . ?  
 C7C C8C H8C 119.7 . . ?  
 C7C C8C C9C 120.6(6) . . ?  
 C9C C8C H8C 119.7 . . ?  
 C8C C9C H9C 120.2 . . ?  
 C8C C9C C10C 119.5(6) . . ?  
 C10C C9C H9C 120.2 . . ?  
 C5C C10C C9C 118.5(6) . . ?  
 C5C C10C H10C 120.8 . . ?  
 C9C C10C H10C 120.8 . . ?  
 N2C C11C C12C 107.6(5) . . ?  
 O3C C11C C12C 129.6(6) . . ?  
 O3C C11C N2C 122.8(5) . . ?  
 C11C C12C H12H 110.7 . . ?  
 C11C C12C H12I 110.7 . . ?  
 C11C C12C C13C 105.4(5) . . ?  
 H12H C12C H12I 108.8 . . ?  
 C13C C12C H12H 110.7 . . ?  
 C13C C12C H12I 110.7 . . ?  
 C12C C13C H13E 109.1 . . ?  
 C14C C13C C12C 105.1(5) . . ?  
 C14C C13C H13E 109.1 . . ?  
 C15C C13C C12C 113.8(5) . . ?  
 C15C C13C H13E 109.1 . . ?  
 C15C C13C C14C 110.5(5) . . ?  
 N2C C14C C13C 107.3(5) . . ?  
 O2C C14C C13C 128.9(5) . . ?  
 O2C C14C N2C 123.7(5) . . ?  
 C13C C15C H15J 109.5 . . ?  
 C13C C15C H15K 109.5 . . ?  
 C13C C15C H15L 109.5 . . ?  
 H15J C15C H15K 109.5 . . ?  
 H15J C15C H15L 109.5 . . ?  
 H15K C15C H15L 109.5 . . ?  
 C4C N1C C5C 127.2(4) . . ?  
 C4C N1C N2C 115.9(4) . . ?  
 N2C N1C C5C 115.5(4) . . ?  
 C14C N2C C11C 114.0(4) . . ?  
 C14C N2C N1C 122.6(5) . . ?  
 N1C N2C C11C 122.6(5) . . ?

loop\_  
   \_geom\_torsion\_atom\_site\_label\_1  
   \_geom\_torsion\_atom\_site\_label\_2  
   \_geom\_torsion\_atom\_site\_label\_3  
   \_geom\_torsion\_atom\_site\_label\_4  
   \_geom\_torsion  
   \_geom\_torsion\_site\_symmetry\_1  
   \_geom\_torsion\_site\_symmetry\_2  
   \_geom\_torsion\_site\_symmetry\_3

```

_geom_torsion_site_symmetry_4
_geom_torsion_publ_flag
C1D C2D C4D N1D 127.6(6) . . . . ?
C1D C2D C4D O1D -52.8(7) . . . . ?
C2D C4D N1D C5D -3.1(8) . . . . ?
C2D C4D N1D N2D 177.9(5) . . . . ?
C3D C2D C4D N1D -56.8(7) . . . . ?
C3D C2D C4D O1D 122.7(6) . . . . ?
C4D N1D N2D C11D 83.5(6) . . . . ?
C4D N1D N2D C14D -82.4(7) . . . . ?
C5D C6D C7D C8D -0.3(9) . . . . ?
C5D N1D N2D C11D -95.6(6) . . . . ?
C5D N1D N2D C14D 98.5(7) . . . . ?
C6D C5D C10D C9D -0.6(8) . . . . ?
C6D C5D N1D C4D -74.5(7) . . . . ?
C6D C5D N1D N2D 104.5(6) . . . . ?
C6D C7D C8D C9D 1.5(10) . . . . ?
C7D C8D C9D C10D -2.2(10) . . . . ?
C8D C9D C10D C5D 1.8(9) . . . . ?
C10D C5D C6D C7D -0.2(8) . . . . ?
C10D C5D N1D C4D 105.5(7) . . . . ?
C10D C5D N1D N2D -75.6(6) . . . . ?
C11D C12D C13D C14D 19.3(16) . . . . ?
C11D C12D C17D C14D -25.8(11) . . . . ?
C11D C12D C17D C16D -141.8(10) . . . . ?
C12D C11D N2D C14D -7.6(7) . . . . ?
C12D C11D N2D N1D -174.5(5) . . . . ?
C12D C13D C14D N2D -22.8(16) . . . . ?
C12D C13D C14D O2D 173.7(10) . . . . ?
C13D C14D N2D C11D 19.1(12) . . . . ?
C13D C14D N2D N1D -174.0(10) . . . . ?
C15D C12D C13D C14D -106.1(13) . . . . ?
C17D C14D N2D C11D -9.8(10) . . . . ?
C17D C14D N2D N1D 157.1(8) . . . . ?
N1D C5D C6D C7D 179.8(5) . . . . ?
N1D C5D C10D C9D 179.5(5) . . . . ?
N2D C11D C12D C13D -9.4(13) . . . . ?
N2D C11D C12D C15D 117.8(10) . . . . ?
N2D C11D C12D C17D 20.8(9) . . . . ?
N2D C14D C17D C12D 21.8(12) . . . . ?
N2D C14D C17D C16D 142.7(10) . . . . ?
O1D C4D N1D C5D 177.3(5) . . . . ?
O1D C4D N1D N2D -1.7(8) . . . . ?
O2D C14D C17D C12D -172.2(9) . . . . ?
O2D C14D C17D C16D -51.2(17) . . . . ?
O2D C14D N2D C11D -176.2(8) . . . . ?
O2D C14D N2D N1D -9.2(12) . . . . ?
O3D C11D C12D C13D 167.5(13) . . . . ?
O3D C11D C12D C15D -65.3(12) . . . . ?
O3D C11D C12D C17D -162.4(9) . . . . ?

```

03D C11D N2D C14D 175.2(7) . . . . ?  
 03D C11D N2D N1D 8.3(9) . . . . ?  
 C1B C2B C4B N1B -129.0(6) . . . . ?  
 C1B C2B C4B 01B 50.3(8) . . . . ?  
 C2B C4B N1B C5B 5.2(9) . . . . ?  
 C2B C4B N1B N2B 176.9(5) . . . . ?  
 C3B C2B C4B N1B 55.8(8) . . . . ?  
 C3B C2B C4B 01B -124.9(7) . . . . ?  
 C4B N1B N2B C11B -77.9(8) . . . . ?  
 C4B N1B N2B C14B 89.2(8) . . . . ?  
 C5B C6B C7B C8B -0.7(9) . . . . ?  
 C5B N1B N2B C11B 94.8(8) . . . . ?  
 C5B N1B N2B C14B -98.2(8) . . . . ?  
 C6B C5B C10B C9B -0.7(8) . . . . ?  
 C6B C5B N1B C4B 75.4(8) . . . . ?  
 C6B C5B N1B N2B -96.2(7) . . . . ?  
 C6B C7B C8B C9B -0.2(10) . . . . ?  
 C7B C8B C9B C10B 0.6(9) . . . . ?  
 C8B C9B C10B C5B -0.1(8) . . . . ?  
 C10B C5B C6B C7B 1.1(9) . . . . ?  
 C10B C5B N1B C4B -104.5(7) . . . . ?  
 C10B C5B N1B N2B 83.9(7) . . . . ?  
 C11B C12B C13B C14B -9.4(12) . . . . ?  
 C11B C12B C13B C15B -131.8(11) . . . . ?  
 C12B C11B N2B C14B 2.6(11) . . . . ?  
 C12B C11B N2B N1B 170.7(7) . . . . ?  
 C12B C13B C14B N2B 10.9(11) . . . . ?  
 C12B C13B C14B 02B -171.1(11) . . . . ?  
 C13B C14B N2B C11B -8.5(9) . . . . ?  
 C13B C14B N2B N1B -176.2(6) . . . . ?  
 C15B C13B C14B N2B 134.2(15) . . . . ?  
 C15B C13B C14B 02B -47.8(18) . . . . ?  
 N1B C5B C6B C7B -178.7(5) . . . . ?  
 N1B C5B C10B C9B 179.1(5) . . . . ?  
 N2B C11B C12B C13B 4.7(12) . . . . ?  
 01B C4B N1B C5B -174.1(6) . . . . ?  
 01B C4B N1B N2B -2.5(9) . . . . ?  
 02B C14B N2B C11B 173.3(9) . . . . ?  
 02B C14B N2B N1B 5.6(13) . . . . ?  
 03B C11B C12B C13B -176.9(11) . . . . ?  
 03B C11B N2B C14B -175.9(10) . . . . ?  
 03B C11B N2B N1B -7.8(13) . . . . ?  
 C1A C2A C4A N1A -125.1(6) . . . . ?  
 C1A C2A C4A 01A 57.4(9) . . . . ?  
 C2A C4A N1A C5A 17.9(8) . . . . ?  
 C2A C4A N1A N2A -176.9(5) . . . . ?  
 C3A C2A C4A N1A 61.1(9) . . . . ?  
 C3A C2A C4A 01A -116.4(8) . . . . ?  
 C4A N1A N2A C11A -81.7(7) . . . . ?  
 C4A N1A N2A C14A 87.5(6) . . . . ?

C5A C6A C7A C8A -0.3(10) . . . . ?  
C5A N1A N2A C11A 85.0(6) . . . . ?  
C5A N1A N2A C14A -105.8(6) . . . . ?  
C6A C5A C10A C9A 0.7(9) . . . . ?  
C6A C5A N1A C4A 67.6(8) . . . . ?  
C6A C5A N1A N2A -97.5(6) . . . . ?  
C6A C7A C8A C9A 0.6(10) . . . . ?  
C7A C8A C9A C10A -0.2(10) . . . . ?  
C8A C9A C10A C5A -0.5(10) . . . . ?  
C10A C5A C6A C7A -0.3(9) . . . . ?  
C10A C5A N1A C4A -112.7(6) . . . . ?  
C10A C5A N1A N2A 82.2(6) . . . . ?  
C11A C12A C13A C14A 4.6(7) . . . . ?  
C11A C12A C13A C15A -116.8(6) . . . . ?  
C12A C11A N2A C14A 6.9(7) . . . . ?  
C12A C11A N2A N1A 176.7(5) . . . . ?  
C12A C13A C14A N2A -0.8(6) . . . . ?  
C12A C13A C14A 02A -178.8(6) . . . . ?  
C13A C14A N2A C11A -3.8(6) . . . . ?  
C13A C14A N2A N1A -173.8(4) . . . . ?  
C15A C13A C14A N2A 121.4(5) . . . . ?  
C15A C13A C14A 02A -56.6(8) . . . . ?  
N1A C5A C6A C7A 179.4(5) . . . . ?  
N1A C5A C10A C9A -179.0(5) . . . . ?  
N2A C11A C12A C13A -6.7(7) . . . . ?  
01A C4A N1A C5A -164.5(6) . . . . ?  
01A C4A N1A N2A 0.7(8) . . . . ?  
02A C14A N2A C11A 174.3(5) . . . . ?  
02A C14A N2A N1A 4.3(8) . . . . ?  
03A C11A C12A C13A 174.2(6) . . . . ?  
03A C11A N2A C14A -174.0(6) . . . . ?  
03A C11A N2A N1A -4.1(9) . . . . ?  
C1C C2C C4C N1C 125.3(6) . . . . ?  
C1C C2C C4C 01C -56.9(8) . . . . ?  
C2C C4C N1C C5C -17.9(8) . . . . ?  
C2C C4C N1C N2C 176.4(5) . . . . ?  
C3C C2C C4C N1C -59.5(8) . . . . ?  
C3C C2C C4C 01C 118.3(8) . . . . ?  
C4C N1C N2C C11C -86.3(6) . . . . ?  
C4C N1C N2C C14C 83.1(6) . . . . ?  
C5C C6C C7C C8C 1.2(11) . . . . ?  
C5C N1C N2C C11C 106.3(6) . . . . ?  
C5C N1C N2C C14C -84.3(6) . . . . ?  
C6C C5C C10C C9C -0.1(9) . . . . ?  
C6C C5C N1C C4C 112.1(6) . . . . ?  
C6C C5C N1C N2C -82.1(6) . . . . ?  
C6C C7C C8C C9C -1.7(12) . . . . ?  
C7C C8C C9C C10C 1.3(12) . . . . ?  
C8C C9C C10C C5C -0.4(11) . . . . ?  
C10C C5C C6C C7C -0.3(9) . . . . ?

C10C C5C N1C C4C -69.6(7) . . . . ?  
 C10C C5C N1C N2C 96.2(6) . . . . ?  
 C11C C12C C13C C14C -5.2(6) . . . . ?  
 C11C C12C C13C C15C -126.1(6) . . . . ?  
 C12C C11C N2C C14C 4.3(7) . . . . ?  
 C12C C11C N2C N1C 174.5(5) . . . . ?  
 C12C C13C C14C N2C 7.7(6) . . . . ?  
 C12C C13C C14C O2C -173.4(6) . . . . ?  
 C13C C14C N2C C11C -7.7(6) . . . . ?  
 C13C C14C N2C N1C -178.0(5) . . . . ?  
 C15C C13C C14C N2C 130.8(6) . . . . ?  
 C15C C13C C14C O2C -50.3(8) . . . . ?  
 N1C C5C C6C C7C 177.9(5) . . . . ?  
 N1C C5C C10C C9C -178.4(6) . . . . ?  
 N2C C11C C12C C13C 1.0(6) . . . . ?  
 O1C C4C N1C C5C 164.4(6) . . . . ?  
 O1C C4C N1C N2C -1.3(8) . . . . ?  
 O2C C14C N2C C11C 173.3(5) . . . . ?  
 O2C C14C N2C N1C 3.1(9) . . . . ?  
 O3C C11C C12C C13C -178.1(7) . . . . ?  
 O3C C11C N2C C14C -176.6(6) . . . . ?  
 O3C C11C N2C N1C -6.3(9) . . . . ?

\_shelx\_res\_file

;

cu\_axi20\_0m.res created by SHELXL-2014/7

TITL cu\_axi20\_0m in P2(1)  
 CELL 1.54178 8.8088 23.665 14.1477 90 104.096 90  
 ZERR 8 0.0004 0.0011 0.0007 0 0.002 0  
 LATT -1  
 SYMM -X,0.5+Y,-Z  
 SFAC C H N O  
 UNIT 120 128 16 24

L.S. 7  
 PLAN -5 0 0  
 SIZE 0.148 0.174 0.24  
 TEMP -173.14  
 HTAB  
 BOND \$H  
 CONF  
 fmap 2  
 acta  
 REM <olex2.extras>  
 REM <HklSrc "%.\cu\_axi20\_0m.hkl">  
 REM </olex2.extras>

WGHT 0.073000 1.915400  
 FVAR 0.49180 0.54849

|           |   |          |          |          |          |          |
|-----------|---|----------|----------|----------|----------|----------|
| C1D       | 1 | 2.736052 | 1.749920 | 1.075647 | 11.00000 | 0.06265  |
| 0.03416 = |   |          |          |          |          |          |
|           |   | 0.04661  | 0.00919  | 0.00855  | 0.01095  |          |
| AFIX 137  |   |          |          |          |          |          |
| H1DA      | 2 | 2.657682 | 1.751940 | 1.013295 | 11.00000 | -1.50000 |
| H1DB      | 2 | 2.838546 | 1.760882 | 1.066068 | 11.00000 | -1.50000 |
| H1DC      | 2 | 2.706589 | 1.775663 | 1.122439 | 11.00000 | -1.50000 |
| AFIX 0    |   |          |          |          |          |          |
| C2D       | 1 | 2.744245 | 1.690486 | 1.114232 | 11.00000 | 0.02607  |
| 0.03575 = |   |          |          |          |          |          |
|           |   | 0.03053  | 0.00112  | 0.01374  | 0.00061  |          |
| C3D       | 1 | 2.665895 | 1.646887 | 1.064645 | 11.00000 | 0.03661  |
| 0.04538 = |   |          |          |          |          |          |
|           |   | 0.02621  | 0.00420  | 0.00773  | -0.00081 |          |
| AFIX 93   |   |          |          |          |          |          |
| H3DA      | 2 | 2.681879 | 1.609758 | 1.090704 | 11.00000 | -1.20000 |
| H3DB      | 2 | 2.594390 | 1.653119 | 1.003447 | 11.00000 | -1.20000 |
| AFIX 0    |   |          |          |          |          |          |
| C4D       | 1 | 2.856610 | 1.681908 | 1.209981 | 11.00000 | 0.03214  |
| 0.02511 = |   |          |          |          |          |          |
|           |   | 0.02867  | -0.00178 | 0.01186  | 0.00096  |          |
| C5D       | 1 | 2.644240 | 1.638767 | 1.279943 | 11.00000 | 0.02145  |
| 0.03563 = |   |          |          |          |          |          |
|           |   | 0.01923  | -0.00073 | 0.00391  | -0.00288 |          |
| C6D       | 1 | 2.531756 | 1.678948 | 1.285051 | 11.00000 | 0.03388  |
| 0.04188 = |   |          |          |          |          |          |
|           |   | 0.02578  | 0.00580  | 0.00933  | 0.00233  |          |
| AFIX 43   |   |          |          |          |          |          |
| H6D       | 2 | 2.556826 | 1.718048 | 1.290360 | 11.00000 | -1.20000 |
| AFIX 0    |   |          |          |          |          |          |
| C7D       | 1 | 2.381642 | 1.660172 | 1.282154 | 11.00000 | 0.02503  |
| 0.06984 = |   |          |          |          |          |          |
|           |   | 0.03521  | 0.00553  | 0.01061  | 0.00543  |          |
| AFIX 43   |   |          |          |          |          |          |
| H7D       | 2 | 2.302505 | 1.686777 | 1.285797 | 11.00000 | -1.20000 |
| AFIX 0    |   |          |          |          |          |          |
| C8D       | 1 | 2.345540 | 1.603252 | 1.274036 | 11.00000 | 0.02952  |
| 0.07383 = |   |          |          |          |          |          |
|           |   | 0.03651  | 0.00033  | 0.00601  | -0.01109 |          |
| AFIX 43   |   |          |          |          |          |          |
| H8D       | 2 | 2.241613 | 1.591028 | 1.270607 | 11.00000 | -1.20000 |
| AFIX 0    |   |          |          |          |          |          |
| C9D       | 1 | 2.460031 | 1.564377 | 1.270929 | 11.00000 | 0.03760  |
| 0.05258 = |   |          |          |          |          |          |
|           |   | 0.03793  | -0.00119 | 0.00773  | -0.01538 |          |
| AFIX 43   |   |          |          |          |          |          |
| H9D       | 2 | 2.435901 | 1.525191 | 1.267681 | 11.00000 | -1.20000 |
| AFIX 0    |   |          |          |          |          |          |
| C10D      | 1 | 2.610270 | 1.582048 | 1.272509 | 11.00000 | 0.03438  |
| 0.04002 = |   |          |          |          |          |          |

|         |     |          |          |          |           |          |
|---------|-----|----------|----------|----------|-----------|----------|
|         |     | 0.02603  | 0.00084  | 0.00921  | -0.00371  |          |
| AFIX    | 43  |          |          |          |           |          |
| H10D    | 2   | 2.688930 | 1.555319 | 1.268508 | 11.00000  | -1.20000 |
| AFIX    | 0   |          |          |          |           |          |
| C11D    | 1   | 2.953502 | 1.689495 | 1.441393 | 11.00000  | 0.04107  |
| 0.04997 | =   |          |          |          |           |          |
|         |     | 0.03099  | -0.00330 | 0.01385  | -0.00761  |          |
| C12D    | 1   | 3.086494 | 1.663494 | 1.518686 | 11.00000  | 0.03713  |
| 0.07864 | =   |          |          |          |           |          |
|         |     | 0.02712  | -0.00469 | -0.00094 | -0.00969  |          |
| PART    | 2   |          |          |          |           |          |
| AFIX    | 13  |          |          |          |           |          |
| H12D    | 2   | 3.056554 | 1.666285 | 1.582317 | -21.00000 | -1.20000 |
| AFIX    | 23  |          |          |          |           |          |
| PART    | 0   |          |          |          |           |          |
| PART    | 1   |          |          |          |           |          |
| H12A    | 2   | 3.047339 | 1.648307 | 1.573512 | 21.00000  | -1.20000 |
| H12B    | 2   | 3.168801 | 1.691876 | 1.544297 | 21.00000  | -1.20000 |
| AFIX    | 0   |          |          |          |           |          |
| PART    | 0   |          |          |          |           |          |
| PART    | 2   |          |          |          |           |          |
| C13D    | 1   | 3.103107 | 1.604677 | 1.499745 | -21.00000 | 0.03832  |
| 0.10398 | =   |          |          |          |           |          |
|         |     | 0.03960  | 0.00165  | 0.00538  | 0.01094   |          |
| AFIX    | 23  |          |          |          |           |          |
| H13A    | 2   | 3.052428 | 1.580718 | 1.540578 | -21.00000 | -1.20000 |
| H13B    | 2   | 3.214555 | 1.593793 | 1.510667 | -21.00000 | -1.20000 |
| AFIX    | 0   |          |          |          |           |          |
| PART    | 0   |          |          |          |           |          |
| C14D    | 1   | 3.012077 | 1.600519 | 1.384392 | 11.00000  | 0.02522  |
| 0.08347 | =   |          |          |          |           |          |
|         |     | 0.05777  | -0.00443 | -0.01047 | 0.00627   |          |
| PART    | 2   |          |          |          |           |          |
| C15D    | 1   | 3.227923 | 1.695494 | 1.528168 | -21.00000 | 0.06194  |
| 0.07348 | =   |          |          |          |           |          |
|         |     | 0.05005  | -0.00817 | -0.00174 | -0.01468  |          |
| AFIX    | 137 |          |          |          |           |          |
| H15A    | 2   | 3.253005 | 1.698210 | 1.464531 | -21.00000 | -1.50000 |
| H15B    | 2   | 3.313876 | 1.676600 | 1.574446 | -21.00000 | -1.50000 |
| H15C    | 2   | 3.213407 | 1.733510 | 1.551998 | -21.00000 | -1.50000 |
| AFIX    | 0   |          |          |          |           |          |
| PART    | 0   |          |          |          |           |          |
| PART    | 1   |          |          |          |           |          |
| C16D    | 1   | 3.199507 | 1.561833 | 1.523906 | 21.00000  | 0.06842  |
| 0.06513 | =   |          |          |          |           |          |
|         |     | 0.05070  | 0.00235  | -0.01336 | 0.02390   |          |
| AFIX    | 137 |          |          |          |           |          |
| H16A    | 2   | 3.290185 | 1.570100 | 1.577762 | 21.00000  | -1.50000 |
| H16B    | 2   | 3.226983 | 1.532194 | 1.482630 | 21.00000  | -1.50000 |
| H16C    | 2   | 3.112274 | 1.548946 | 1.550157 | 21.00000  | -1.50000 |

|         |     |          |          |          |          |          |
|---------|-----|----------|----------|----------|----------|----------|
| AFIX    | 0   |          |          |          |          |          |
| C17D    | 1   | 3.151936 | 1.614536 | 1.464171 | 21.00000 | 0.02014  |
| 0.06817 | =   |          |          |          |          |          |
|         |     | 0.02374  | -0.00189 | -0.00029 | 0.00455  |          |
| AFIX    | 13  |          |          |          |          |          |
| H17D    | 2   | 3.239605 | 1.628508 | 1.436882 | 21.00000 | -1.20000 |
| AFIX    | 0   |          |          |          |          |          |
| PART    | 0   |          |          |          |          |          |
| N1D     | 3   | 2.801946 | 1.656557 | 1.282342 | 11.00000 | 0.02240  |
| 0.04508 | =   |          |          |          |          |          |
|         |     | 0.02349  | -0.00170 | 0.00326  | -0.00453 |          |
| N2D     | 3   | 2.911913 | 1.647451 | 1.370140 | 11.00000 | 0.02823  |
| 0.04581 | =   |          |          |          |          |          |
|         |     | 0.02507  | -0.00333 | 0.00207  | -0.00042 |          |
| 01D     | 4   | 2.994057 | 1.696570 | 1.224232 | 11.00000 | 0.02794  |
| 0.04158 | =   |          |          |          |          |          |
|         |     | 0.04615  | 0.00216  | 0.01170  | -0.00727 |          |
| 02D     | 4   | 3.000270 | 1.561439 | 1.328655 | 11.00000 | 0.03716  |
| 0.06884 | =   |          |          |          |          |          |
|         |     | 0.09520  | -0.03113 | -0.00332 | 0.01021  |          |
| 03D     | 4   | 2.887519 | 1.733552 | 1.437541 | 11.00000 | 0.05819  |
| 0.05547 | =   |          |          |          |          |          |
|         |     | 0.04558  | -0.01291 | 0.01541  | -0.01341 |          |
| C1B     | 1   | 3.227468 | 1.774883 | 1.084309 | 11.00000 | 0.05211  |
| 0.03558 | =   |          |          |          |          |          |
|         |     | 0.03207  | -0.00313 | 0.00954  | -0.00614 |          |
| AFIX    | 137 |          |          |          |          |          |
| H1BA    | 2   | 3.161733 | 1.774197 | 1.017586 | 11.00000 | -1.50000 |
| H1BB    | 2   | 3.184436 | 1.748882 | 1.125020 | 11.00000 | -1.50000 |
| H1BC    | 2   | 3.334079 | 1.763188 | 1.084022 | 11.00000 | -1.50000 |
| AFIX    | 0   |          |          |          |          |          |
| C2B     | 1   | 3.230760 | 1.833461 | 1.124444 | 11.00000 | 0.03771  |
| 0.02652 | =   |          |          |          |          |          |
|         |     | 0.03292  | -0.00027 | 0.01653  | -0.00954 |          |
| C3B     | 1   | 3.151831 | 1.876812 | 1.077675 | 11.00000 | 0.04070  |
| 0.03634 | =   |          |          |          |          |          |
|         |     | 0.02994  | -0.00355 | 0.01217  | -0.00533 |          |
| AFIX    | 93  |          |          |          |          |          |
| H3BA    | 2   | 3.087250 | 1.871864 | 1.013849 | 11.00000 | -1.20000 |
| H3BB    | 2   | 3.159724 | 1.912896 | 1.107910 | 11.00000 | -1.20000 |
| AFIX    | 0   |          |          |          |          |          |
| C4B     | 1   | 3.345031 | 1.839729 | 1.221608 | 11.00000 | 0.02755  |
| 0.03485 | =   |          |          |          |          |          |
|         |     | 0.03859  | -0.00512 | 0.00954  | 0.00066  |          |
| C5B     | 1   | 3.130246 | 1.879851 | 1.292239 | 11.00000 | 0.02917  |
| 0.04375 | =   |          |          |          |          |          |
|         |     | 0.02199  | 0.00099  | 0.00510  | 0.00374  |          |
| C6B     | 1   | 3.020684 | 1.838917 | 1.297339 | 11.00000 | 0.04003  |
| 0.03647 | =   |          |          |          |          |          |



|         |    |  |          |          |          |          |          |
|---------|----|--|----------|----------|----------|----------|----------|
|         |    |  | 0.03433  | -0.00096 | 0.00924  | -0.00286 |          |
| AFIX    | 43 |  |          |          |          |          |          |
| H6B     | 2  |  | 3.049975 | 1.800216 | 1.304062 | 11.00000 | -1.20000 |
| AFIX    | 0  |  |          |          |          |          |          |
| C7B     | 1  |  | 2.867574 | 1.854889 | 1.292547 | 11.00000 | 0.04029  |
| 0.05264 | =  |  |          |          |          |          |          |
|         |    |  | 0.04555  | -0.01230 | 0.01697  | -0.01586 |          |
| AFIX    | 43 |  |          |          |          |          |          |
| H7B     | 2  |  | 2.791012 | 1.827071 | 1.295298 | 11.00000 | -1.20000 |
| AFIX    | 0  |  |          |          |          |          |          |
| C8B     | 1  |  | 2.826677 | 1.911164 | 1.283792 | 11.00000 | 0.02735  |
| 0.06082 | =  |  |          |          |          |          |          |
|         |    |  | 0.04369  | -0.00334 | 0.00712  | 0.00471  |          |
| AFIX    | 43 |  |          |          |          |          |          |
| H8B     | 2  |  | 2.721551 | 1.921909 | 1.280329 | 11.00000 | -1.20000 |
| AFIX    | 0  |  |          |          |          |          |          |
| C9B     | 1  |  | 2.936331 | 1.952065 | 1.279993 | 11.00000 | 0.03567  |
| 0.04454 | =  |  |          |          |          |          |          |
|         |    |  | 0.03211  | 0.00035  | 0.00520  | 0.01020  |          |
| AFIX    | 43 |  |          |          |          |          |          |
| H9B     | 2  |  | 2.906581 | 1.990741 | 1.274569 | 11.00000 | -1.20000 |
| AFIX    | 0  |  |          |          |          |          |          |
| C10B    | 1  |  | 3.092141 | 1.936809 | 1.284110 | 11.00000 | 0.03191  |
| 0.03250 | =  |  |          |          |          |          |          |
|         |    |  | 0.03005  | 0.00133  | 0.00602  | 0.00077  |          |
| AFIX    | 43 |  |          |          |          |          |          |
| H10B    | 2  |  | 3.168773 | 1.964609 | 1.281411 | 11.00000 | -1.20000 |
| AFIX    | 0  |  |          |          |          |          |          |
| C11B    | 1  |  | 3.428730 | 1.818291 | 1.444655 | 11.00000 | 0.07708  |
| 0.10968 | =  |  |          |          |          |          |          |
|         |    |  | 0.04551  | -0.00819 | -0.01635 | 0.06504  |          |
| C12B    | 1  |  | 3.564577 | 1.831768 | 1.527864 | 11.00000 | 0.10681  |
| 0.13421 | =  |  |          |          |          |          |          |
|         |    |  | 0.08206  | -0.00917 | -0.04464 | 0.05797  |          |
| AFIX    | 23 |  |          |          |          |          |          |
| H12C    | 2  |  | 3.656710 | 1.808460 | 1.525069 | 11.00000 | -1.20000 |
| H12E    | 2  |  | 3.537932 | 1.825118 | 1.591009 | 11.00000 | -1.20000 |
| AFIX    | 0  |  |          |          |          |          |          |
| C13B    | 1  |  | 3.596449 | 1.893673 | 1.514771 | 11.00000 | 0.04050  |
| 0.20049 | =  |  |          |          |          |          |          |
|         |    |  | 0.07305  | -0.06076 | -0.02857 | 0.02397  |          |
| AFIX    | 13 |  |          |          |          |          |          |
| H13C    | 2  |  | 3.562117 | 1.915810 | 1.566091 | 11.00000 | -1.20000 |
| AFIX    | 0  |  |          |          |          |          |          |
| C14B    | 1  |  | 3.494674 | 1.910926 | 1.414224 | 11.00000 | 0.03534  |
| 0.09536 | =  |  |          |          |          |          |          |
|         |    |  | 0.07733  | -0.04225 | 0.00182  | 0.00974  |          |
| C15B    | 1  |  | 3.752294 | 1.904631 | 1.521895 | 11.00000 | 0.10056  |
| 0.40120 | =  |  |          |          |          |          |          |
|         |    |  | 0.08807  | -0.01801 | -0.00016 | -0.03319 |          |

|           |   |          |          |          |          |          |
|-----------|---|----------|----------|----------|----------|----------|
| AFIX 137  |   |          |          |          |          |          |
| H15D      | 2 | 3.765980 | 1.944854 | 1.509716 | 11.00000 | -1.50000 |
| H15E      | 2 | 3.788408 | 1.882008 | 1.473607 | 11.00000 | -1.50000 |
| H15F      | 2 | 3.813450 | 1.894833 | 1.587433 | 11.00000 | -1.50000 |
| AFIX 0    |   |          |          |          |          |          |
| N1B       | 3 | 3.289421 | 1.863757 | 1.295111 | 11.00000 | 0.02921  |
| 0.05047 = |   |          |          |          |          |          |
|           |   | 0.03102  | -0.01007 | 0.00015  | 0.00938  |          |
| N2B       | 3 | 3.395620 | 1.866421 | 1.385453 | 11.00000 | 0.03732  |
| 0.06596 = |   |          |          |          |          |          |
|           |   | 0.03946  | -0.01721 | -0.00942 | 0.01585  |          |
| 01B       | 4 | 3.480117 | 1.824063 | 1.236003 | 11.00000 | 0.03047  |
| 0.04814 = |   |          |          |          |          |          |
|           |   | 0.05357  | -0.01289 | 0.01014  | 0.00494  |          |
| 02B       | 4 | 3.493578 | 1.952853 | 1.369672 | 11.00000 | 0.03699  |
| 0.09952 = |   |          |          |          |          |          |
|           |   | 0.09464  | -0.03978 | 0.01292  | -0.01537 |          |
| 03B       | 4 | 3.359614 | 1.773472 | 1.428483 | 11.00000 | 0.15270  |
| 0.07344 = |   |          |          |          |          |          |
|           |   | 0.06390  | 0.00495  | -0.00725 | 0.05863  |          |
|           |   |          |          |          |          |          |
| C1A       | 1 | 2.677077 | 1.571391 | 1.540316 | 11.00000 | 0.08441  |
| 0.09612 = |   |          |          |          |          |          |
|           |   | 0.04059  | -0.01974 | 0.01432  | -0.02623 |          |
| AFIX 137  |   |          |          |          |          |          |
| H1AA      | 2 | 2.624730 | 1.583584 | 1.474214 | 11.00000 | -1.50000 |
| H1AB      | 2 | 2.609586 | 1.544807 | 1.564138 | 11.00000 | -1.50000 |
| H1AC      | 2 | 2.776161 | 1.552822 | 1.539428 | 11.00000 | -1.50000 |
| AFIX 0    |   |          |          |          |          |          |
| C2A       | 1 | 2.708821 | 1.621810 | 1.606348 | 11.00000 | 0.03940  |
| 0.07283 = |   |          |          |          |          |          |
|           |   | 0.02530  | 0.00184  | 0.01617  | -0.00892 |          |
| C3A       | 1 | 2.665417 | 1.673475 | 1.580728 | 11.00000 | 0.08108  |
| 0.08183 = |   |          |          |          |          |          |
|           |   | 0.04455  | 0.02451  | 0.01964  | -0.00012 |          |
| AFIX 93   |   |          |          |          |          |          |
| H3AA      | 2 | 2.609131 | 1.681319 | 1.515789 | 11.00000 | -1.20000 |
| H3AB      | 2 | 2.690123 | 1.703220 | 1.627028 | 11.00000 | -1.20000 |
| AFIX 0    |   |          |          |          |          |          |
| C4A       | 1 | 2.813324 | 1.608733 | 1.704843 | 11.00000 | 0.03448  |
| 0.04050 = |   |          |          |          |          |          |
|           |   | 0.03248  | -0.00412 | 0.01110  | -0.00588 |          |
| C5A       | 1 | 2.592546 | 1.634033 | 1.781052 | 11.00000 | 0.02442  |
| 0.03591 = |   |          |          |          |          |          |
|           |   | 0.01995  | -0.00010 | 0.00419  | -0.00371 |          |
| C6A       | 1 | 2.484383 | 1.591204 | 1.760553 | 11.00000 | 0.03730  |
| 0.03997 = |   |          |          |          |          |          |
|           |   | 0.03827  | 0.00081  | 0.00735  | -0.00572 |          |
| AFIX 43   |   |          |          |          |          |          |
| H6A       | 2 | 2.514541 | 1.554047 | 1.747400 | 11.00000 | -1.20000 |

|         |     |          |          |          |          |          |
|---------|-----|----------|----------|----------|----------|----------|
| AFIX    | 0   |          |          |          |          |          |
| C7A     | 1   | 2.329602 | 1.603513 | 1.759503 | 11.00000 | 0.02817  |
| 0.05754 | =   |          |          |          |          |          |
|         |     | 0.05444  | 0.01457  | 0.00652  | -0.01276 |          |
| AFIX    | 43  |          |          |          |          |          |
| H7A     | 2   | 2.253278 | 1.574369 | 1.745080 | 11.00000 | -1.20000 |
| AFIX    | 0   |          |          |          |          |          |
| C8A     | 1   | 2.285810 | 1.656169 | 1.778623 | 11.00000 | 0.03001  |
| 0.08148 | =   |          |          |          |          |          |
|         |     | 0.02852  | 0.00459  | 0.00682  | 0.00729  |          |
| AFIX    | 43  |          |          |          |          |          |
| H8A     | 2   | 2.179658 | 1.663640 | 1.778131 | 11.00000 | -1.20000 |
| AFIX    | 0   |          |          |          |          |          |
| C9A     | 1   | 2.393618 | 1.698631 | 1.798630 | 11.00000 | 0.04447  |
| 0.05470 | =   |          |          |          |          |          |
|         |     | 0.05135  | -0.02095 | -0.00833 | 0.01595  |          |
| AFIX    | 43  |          |          |          |          |          |
| H9A     | 2   | 2.362062 | 1.735589 | 1.811846 | 11.00000 | -1.20000 |
| AFIX    | 0   |          |          |          |          |          |
| C10A    | 1   | 2.548164 | 1.688254 | 1.799798 | 11.00000 | 0.03725  |
| 0.03975 | =   |          |          |          |          |          |
|         |     | 0.04093  | -0.00890 | 0.00068  | 0.00046  |          |
| AFIX    | 43  |          |          |          |          |          |
| H10A    | 2   | 2.623137 | 1.717874 | 1.813269 | 11.00000 | -1.20000 |
| AFIX    | 0   |          |          |          |          |          |
| C11A    | 1   | 2.871711 | 1.560383 | 1.920628 | 11.00000 | 0.04104  |
| 0.02742 | =   |          |          |          |          |          |
|         |     | 0.04277  | -0.00683 | 0.00802  | 0.00442  |          |
| C12A    | 1   | 2.995062 | 1.566168 | 2.015344 | 11.00000 | 0.04533  |
| 0.04640 | =   |          |          |          |          |          |
|         |     | 0.05213  | 0.01341  | -0.00052 | 0.00405  |          |
| AFIX    | 23  |          |          |          |          |          |
| H12F    | 2   | 3.079154 | 1.537860 | 2.019388 | 11.00000 | -1.20000 |
| H12G    | 2   | 2.948612 | 1.561224 | 2.071872 | 11.00000 | -1.20000 |
| AFIX    | 0   |          |          |          |          |          |
| C13A    | 1   | 3.059119 | 1.626639 | 2.012557 | 11.00000 | 0.02690  |
| 0.04277 | =   |          |          |          |          |          |
|         |     | 0.03885  | -0.00635 | 0.00048  | 0.00212  |          |
| AFIX    | 13  |          |          |          |          |          |
| H13D    | 2   | 3.044924 | 1.647971 | 2.070814 | 11.00000 | -1.20000 |
| AFIX    | 0   |          |          |          |          |          |
| C14A    | 1   | 2.961230 | 1.654029 | 1.921307 | 11.00000 | 0.02509  |
| 0.03712 | =   |          |          |          |          |          |
|         |     | 0.03632  | -0.01090 | 0.00476  | 0.00135  |          |
| C15A    | 1   | 3.231537 | 1.627046 | 2.011890 | 11.00000 | 0.03871  |
| 0.06675 | =   |          |          |          |          |          |
|         |     | 0.04073  | 0.00090  | 0.00391  | 0.00281  |          |
| AFIX    | 137 |          |          |          |          |          |
| H15G    | 2   | 3.247792 | 1.602966 | 1.958861 | 11.00000 | -1.50000 |
| H15H    | 2   | 3.293858 | 1.612661 | 2.074283 | 11.00000 | -1.50000 |

|         |     |          |          |          |          |          |
|---------|-----|----------|----------|----------|----------|----------|
| H15I    | 2   | 3.264041 | 1.665772 | 2.002096 | 11.00000 | -1.50000 |
| AFIX    | 0   |          |          |          |          |          |
| N1A     | 3   | 2.754398 | 1.622929 | 1.783789 | 11.00000 | 0.02332  |
| 0.03574 | =   |          |          |          |          |          |
|         |     | 0.02499  | -0.00152 | 0.00464  | -0.00239 |          |
| N2A     | 3   | 2.854217 | 1.613518 | 1.875783 | 11.00000 | 0.02551  |
| 0.02798 | =   |          |          |          |          |          |
|         |     | 0.03049  | -0.00220 | 0.00428  | 0.00058  |          |
| O1A     | 4   | 2.944570 | 1.588682 | 1.716560 | 11.00000 | 0.03251  |
| 0.05521 | =   |          |          |          |          |          |
|         |     | 0.04731  | -0.00439 | 0.01868  | 0.00160  |          |
| O2A     | 4   | 2.972265 | 1.700258 | 1.890345 | 11.00000 | 0.03897  |
| 0.03472 | =   |          |          |          |          |          |
|         |     | 0.05047  | -0.00338 | 0.00644  | -0.00970 |          |
| O3A     | 4   | 2.796976 | 1.519701 | 1.886504 | 11.00000 | 0.05050  |
| 0.03436 | =   |          |          |          |          |          |
|         |     | 0.04495  | -0.00360 | 0.01493  | -0.00146 |          |
| C1C     | 1   | 2.840262 | 1.441798 | 1.448619 | 11.00000 | 0.06827  |
| 0.09443 | =   |          |          |          |          |          |
|         |     | 0.02966  | -0.01622 | 0.00820  | -0.01118 |          |
| AFIX    | 137 |          |          |          |          |          |
| H1CA    | 2   | 2.741105 | 1.455972 | 1.459089 | 11.00000 | -1.50000 |
| H1CB    | 2   | 2.893718 | 1.472203 | 1.422526 | 11.00000 | -1.50000 |
| H1CC    | 2   | 2.906756 | 1.428660 | 1.510692 | 11.00000 | -1.50000 |
| AFIX    | 0   |          |          |          |          |          |
| C2C     | 1   | 2.808846 | 1.394293 | 1.378439 | 11.00000 | 0.04355  |
| 0.05457 | =   |          |          |          |          |          |
|         |     | 0.02962  | 0.00365  | 0.01275  | -0.01194 |          |
| C3C     | 1   | 2.858708 | 1.341441 | 1.399893 | 11.00000 | 0.07482  |
| 0.07663 | =   |          |          |          |          |          |
|         |     | 0.03134  | 0.01826  | -0.00148 | -0.00663 |          |
| AFIX    | 93  |          |          |          |          |          |
| H3CA    | 2   | 2.918344 | 1.332471 | 1.463589 | 11.00000 | -1.20000 |
| H3CB    | 2   | 2.834533 | 1.312824 | 1.351455 | 11.00000 | -1.20000 |
| AFIX    | 0   |          |          |          |          |          |
| C4C     | 1   | 2.704333 | 1.407475 | 1.281591 | 11.00000 | 0.03558  |
| 0.03408 | =   |          |          |          |          |          |
|         |     | 0.03150  | 0.00249  | 0.01107  | -0.00847 |          |
| C5C     | 1   | 2.923621 | 1.386390 | 1.201044 | 11.00000 | 0.02627  |
| 0.03225 | =   |          |          |          |          |          |
|         |     | 0.02308  | -0.00005 | 0.00331  | 0.00289  |          |
| C6C     | 1   | 2.970659 | 1.333655 | 1.179683 | 11.00000 | 0.02841  |
| 0.03520 | =   |          |          |          |          |          |
|         |     | 0.04533  | -0.00386 | -0.00342 | 0.00148  |          |
| AFIX    | 43  |          |          |          |          |          |
| H6C     | 2   | 2.898387 | 1.303151 | 1.167884 | 11.00000 | -1.20000 |
| AFIX    | 0   |          |          |          |          |          |
| C7C     | 1   | 3.124657 | 1.325278 | 1.175470 | 11.00000 | 0.03196  |
| 0.05284 | =   |          |          |          |          |          |

|         |     |          |          |          |          |          |
|---------|-----|----------|----------|----------|----------|----------|
|         |     | 0.07081  | -0.01206 | 0.00026  | 0.01386  |          |
| AFIX    | 43  |          |          |          |          |          |
| H7C     | 2   | 3.157795 | 1.289072 | 1.159501 | 11.00000 | -1.20000 |
| AFIX    | 0   |          |          |          |          |          |
| C8C     | 1   | 3.229176 | 1.369229 | 1.194341 | 11.00000 | 0.02509  |
| 0.07066 | =   |          |          |          |          |          |
|         |     | 0.07287  | -0.01978 | 0.00669  | 0.00361  |          |
| AFIX    | 43  |          |          |          |          |          |
| H8C     | 2   | 3.335217 | 1.363011 | 1.193098 | 11.00000 | -1.20000 |
| AFIX    | 0   |          |          |          |          |          |
| C9C     | 1   | 3.181478 | 1.422673 | 1.215226 | 11.00000 | 0.03095  |
| 0.04856 | =   |          |          |          |          |          |
|         |     | 0.07725  | -0.00825 | 0.00680  | -0.01324 |          |
| AFIX    | 43  |          |          |          |          |          |
| H9C     | 2   | 3.253904 | 1.453131 | 1.226920 | 11.00000 | -1.20000 |
| AFIX    | 0   |          |          |          |          |          |
| C10C    | 1   | 3.025131 | 1.431459 | 1.218969 | 11.00000 | 0.03094  |
| 0.03192 | =   |          |          |          |          |          |
|         |     | 0.05012  | -0.00658 | 0.00608  | -0.00535 |          |
| AFIX    | 43  |          |          |          |          |          |
| H10C    | 2   | 2.990444 | 1.467708 | 1.233552 | 11.00000 | -1.20000 |
| AFIX    | 0   |          |          |          |          |          |
| C11C    | 1   | 2.552417 | 1.364250 | 1.064760 | 11.00000 | 0.03036  |
| 0.03621 | =   |          |          |          |          |          |
|         |     | 0.03708  | 0.00079  | 0.00326  | 0.00038  |          |
| C12C    | 1   | 2.453135 | 1.390944 | 0.974979 | 11.00000 | 0.03258  |
| 0.04647 | =   |          |          |          |          |          |
|         |     | 0.03528  | -0.00048 | 0.00067  | 0.00084  |          |
| AFIX    | 23  |          |          |          |          |          |
| H12H    | 2   | 2.341873 | 1.391495 | 0.977636 | 11.00000 | -1.20000 |
| H12I    | 2   | 2.462172 | 1.369956 | 0.916063 | 11.00000 | -1.20000 |
| AFIX    | 0   |          |          |          |          |          |
| C13C    | 1   | 2.516674 | 1.451781 | 0.973603 | 11.00000 | 0.03914  |
| 0.03832 | =   |          |          |          |          |          |
|         |     | 0.03278  | 0.00211  | 0.00719  | 0.00213  |          |
| AFIX    | 13  |          |          |          |          |          |
| H13E    | 2   | 2.567696 | 1.455623 | 0.918051 | 11.00000 | -1.20000 |
| AFIX    | 0   |          |          |          |          |          |
| C14C    | 1   | 2.639410 | 1.457839 | 1.068430 | 11.00000 | 0.02970  |
| 0.03303 | =   |          |          |          |          |          |
|         |     | 0.03511  | 0.00437  | 0.00742  | 0.00328  |          |
| C15C    | 1   | 2.393599 | 1.496666 | 0.965246 | 11.00000 | 0.06013  |
| 0.04918 | =   |          |          |          |          |          |
|         |     | 0.05478  | 0.00306  | -0.00979 | 0.01854  |          |
| AFIX    | 137 |          |          |          |          |          |
| H15J    | 2   | 2.345413 | 1.493817 | 1.020619 | 11.00000 | -1.50000 |
| H15K    | 2   | 2.313290 | 1.491477 | 0.904376 | 11.00000 | -1.50000 |
| H15L    | 2   | 2.441778 | 1.533996 | 0.965290 | 11.00000 | -1.50000 |
| AFIX    | 0   |          |          |          |          |          |
| N1C     | 3   | 2.762110 | 1.395656 | 1.202258 | 11.00000 | 0.02601  |

```

0.03490 =
      0.02482    0.00447    0.00206   -0.00191
N2C   3      2.660362    1.405016    1.111961    11.00000    0.02507
0.03557 =
      0.02280    0.00308    0.00004    0.00005
01C   4      2.573228    1.426003    1.273503    11.00000    0.03605
0.05557 =
      0.04525   -0.00270    0.01884    0.00170
02C   4      2.711662    1.499485    1.102948    11.00000    0.04728
0.03399 =
      0.03632   -0.00040    0.00718   -0.00039
03C   4      2.549154    1.316842    1.095215    11.00000    0.04908
0.04031 =
      0.05516    0.00698   -0.01085   -0.00945
HKLF  4

```

```

REM  cu_axi20_0m in P2(1)
REM R1 = 0.0610 for 7549 Fo > 4sig(Fo) and 0.0700 for all
8826 data
REM 749 parameters refined using 1 restraints

```

END

```

WGHT      0.0730      1.9153

```

REM Instructions for potential hydrogen bonds

```

EQIV $1 x, y, z+1
HTAB C13A 01D_$1
HTAB C10C 02D
EQIV $2 -x+6, y-1/2, -z+2
HTAB C12C 01B_$2
EQIV $3 x, y, z-1
HTAB C13C 03A_$3

```

```

REM Highest difference peak 0.503, deepest hole -0.294, 1-sigma
level 0.052

```

```

Q1   1   3.5740  1.8121  1.6046  11.00000  0.05   0.50
Q2   1   3.0554  1.5395  2.0709  11.00000  0.05   0.43
Q3   1   3.0624  1.5727  1.9708  11.00000  0.05   0.36
Q4   1   3.0399  1.7238  1.6067  11.00000  0.05   0.30
Q5   1   3.0272  1.6994  1.5181  11.00000  0.05   0.25

```

```

;
_shelx_res_checksum      38044
_shelx_hkl_file
;

```

```

-1   0   0 8.50823 0.99998 5
-1   0   0 9.64630 0.93628 4
-1   0   0 9.61772 1.05123 5
-1   0   0 9.65104 0.86998 4
-2   0   0 372.460 22.1450 4

```

|    |    |   |         |         |    |
|----|----|---|---------|---------|----|
| -2 | 0  | 0 | 350.891 | 22.0149 | 5  |
| -2 | 0  | 0 | 361.065 | 22.1294 | 4  |
| -2 | 0  | 0 | 366.343 | 22.8874 | 2  |
| -2 | 0  | 0 | 366.286 | 22.0786 | 3  |
| -2 | 0  | 0 | 344.766 | 21.9958 | 5  |
| -3 | 0  | 0 | 13.9800 | 1.85809 | 4  |
| -3 | 0  | 0 | 13.5872 | 1.61828 | 3  |
| -3 | 0  | 0 | 13.8500 | 1.76228 | 4  |
| -3 | 0  | 0 | 11.3315 | 2.48837 | 2  |
| -4 | 0  | 0 | 172.308 | 10.7200 | 3  |
| -4 | 0  | 0 | 166.411 | 10.7420 | 4  |
| -4 | 0  | 0 | 156.745 | 11.2278 | 1  |
| -4 | 0  | 0 | 159.866 | 10.7052 | 4  |
| -5 | 0  | 0 | 31.3220 | 2.96691 | 3  |
| -5 | 0  | 0 | 27.8813 | 3.02505 | 4  |
| -6 | 0  | 0 | 87.1173 | 6.55138 | 4  |
| -8 | 0  | 0 | 33.1615 | 3.13468 | 8  |
| 9  | 0  | 0 | 1.31977 | 3.23207 | 13 |
| -9 | 0  | 0 | 4.71977 | 1.33444 | 8  |
| 10 | 0  | 0 | 6.08522 | 2.78165 | 13 |
| -1 | -1 | 0 | 3400.10 | 214.337 | 5  |
| -1 | -1 | 0 | 3502.60 | 212.789 | 4  |
| -1 | -1 | 0 | 3554.59 | 215.064 | 5  |
| -1 | 1  | 0 | 3512.91 | 212.636 | 3  |
| -1 | 1  | 0 | 3373.92 | 212.638 | 3  |
| -1 | 1  | 0 | 3766.77 | 212.880 | 4  |
| -1 | 1  | 0 | 3488.97 | 212.824 | 4  |
| -2 | -1 | 0 | 592.201 | 35.5971 | 3  |
| -2 | -1 | 0 | 574.487 | 35.6510 | 4  |
| -2 | -1 | 0 | 589.853 | 36.3377 | 2  |
| -2 | -1 | 0 | 586.380 | 35.6447 | 4  |
| -2 | -1 | 0 | 566.510 | 35.9582 | 5  |
| -2 | -1 | 0 | 606.282 | 36.1380 | 5  |
| -2 | 1  | 0 | 599.904 | 35.5110 | 4  |
| -2 | 1  | 0 | 573.239 | 36.2869 | 2  |
| -2 | 1  | 0 | 569.534 | 35.5087 | 4  |
| -2 | 1  | 0 | 572.013 | 35.4463 | 3  |
| -3 | -1 | 0 | 101.871 | 7.25326 | 5  |
| -3 | -1 | 0 | 103.758 | 8.28152 | 2  |
| -3 | -1 | 0 | 102.291 | 7.26293 | 4  |
| -3 | -1 | 0 | 99.5698 | 7.22996 | 5  |
| -3 | -1 | 0 | 103.402 | 7.26932 | 4  |
| -3 | -1 | 0 | 104.632 | 7.19918 | 3  |
| -3 | 1  | 0 | 124.904 | 7.17364 | 4  |
| -3 | 1  | 0 | 119.963 | 7.16134 | 4  |
| -3 | 1  | 0 | 119.866 | 7.09344 | 3  |
| -4 | -1 | 0 | 16.1654 | 2.34681 | 4  |
| -4 | -1 | 0 | 15.6828 | 3.22674 | 2  |
| -4 | -1 | 0 | 15.5517 | 3.17043 | 1  |
| -5 | -1 | 0 | 1.20257 | 1.71842 | 1  |

|    |    |   |         |         |    |
|----|----|---|---------|---------|----|
| -5 | -1 | 0 | 0.57397 | 1.37805 | 4  |
| -5 | 1  | 0 | 3.71584 | 1.29843 | 3  |
| -5 | 1  | 0 | 2.80866 | 1.37912 | 4  |
| -6 | -1 | 0 | 18.2338 | 2.91189 | 4  |
| -6 | 1  | 0 | 22.0778 | 2.56196 | 4  |
| -8 | -1 | 0 | 16.0721 | 2.44913 | 8  |
| -8 | 1  | 0 | 23.5257 | 2.66766 | 8  |
| 8  | 1  | 0 | 18.8342 | 3.87513 | 13 |
| -9 | -1 | 0 | 3.65412 | 1.50227 | 8  |
| 9  | 1  | 0 | -2.8929 | 3.24855 | 13 |
| 10 | -1 | 0 | 3.47242 | 2.13337 | 13 |
| 10 | 1  | 0 | 1.76557 | 2.28696 | 13 |
| 0  | 2  | 0 | 13.4162 | 1.09505 | 5  |
| 0  | 2  | 0 | 13.2145 | 0.98290 | 4  |
| -1 | -2 | 0 | 1454.31 | 86.9994 | 5  |
| -1 | 2  | 0 | 1405.82 | 86.3582 | 4  |
| -1 | 2  | 0 | 1422.08 | 86.4258 | 4  |
| -2 | -2 | 0 | 3.92569 | 0.88360 | 3  |
| -2 | -2 | 0 | 3.39989 | 1.48861 | 5  |
| -2 | -2 | 0 | 3.67705 | 0.91506 | 4  |
| -2 | -2 | 0 | 3.83472 | 1.01498 | 4  |
| -2 | -2 | 0 | 3.26013 | 0.92040 | 4  |
| -2 | -2 | 0 | 3.75505 | 1.51147 | 5  |
| -2 | -2 | 0 | 4.52889 | 1.83945 | 2  |
| -3 | -2 | 0 | 2246.21 | 138.432 | 3  |
| -3 | -2 | 0 | 2136.74 | 138.850 | 5  |
| -3 | -2 | 0 | 2356.36 | 139.106 | 5  |
| -3 | -2 | 0 | 2342.51 | 139.541 | 2  |
| -3 | -2 | 0 | 2328.64 | 138.534 | 4  |
| -3 | 2  | 0 | 2278.95 | 138.171 | 4  |
| -3 | 2  | 0 | 2359.21 | 138.174 | 3  |
| -3 | 2  | 0 | 2201.76 | 138.181 | 4  |
| -4 | -2 | 0 | 28.1575 | 3.04058 | 4  |
| -4 | -2 | 0 | 29.8920 | 4.19484 | 2  |
| -4 | -2 | 0 | 27.8819 | 3.73755 | 1  |
| -4 | -2 | 0 | 28.5710 | 2.81085 | 3  |
| -4 | 2  | 0 | 23.8026 | 2.39374 | 4  |
| -4 | 2  | 0 | 23.4686 | 2.21688 | 3  |
| -4 | 2  | 0 | 23.6391 | 2.35308 | 4  |
| -5 | -2 | 0 | 30.2180 | 3.40611 | 4  |
| -5 | -2 | 0 | 33.0581 | 4.15637 | 1  |
| -5 | 2  | 0 | 26.8185 | 2.66588 | 4  |
| -5 | 2  | 0 | 26.8441 | 2.62063 | 4  |
| -5 | 2  | 0 | 30.0472 | 2.84903 | 3  |
| -6 | -2 | 0 | 64.2239 | 5.24827 | 4  |
| -6 | 2  | 0 | 61.4483 | 4.40901 | 4  |
| -6 | 2  | 0 | 52.7285 | 4.14124 | 4  |
| -6 | 2  | 0 | 56.3632 | 4.87015 | 3  |
| -7 | -2 | 0 | 29.7196 | 3.93449 | 10 |
| 7  | 2  | 0 | 28.8668 | 5.19295 | 13 |



|    |    |   |         |         |    |
|----|----|---|---------|---------|----|
| -8 | -2 | 0 | 10.6367 | 2.05917 | 8  |
| -8 | 2  | 0 | 5.73531 | 1.47342 | 8  |
| 8  | 2  | 0 | 6.44392 | 3.49821 | 13 |
| -9 | -2 | 0 | 22.7525 | 2.87032 | 8  |
| 9  | 2  | 0 | 16.1582 | 4.16245 | 13 |
| 10 | 2  | 0 | 11.6252 | 3.13173 | 13 |
| 0  | 3  | 0 | 2.03040 | 0.55809 | 4  |
| 0  | 3  | 0 | 2.33513 | 0.53348 | 4  |
| -1 | -3 | 0 | 1418.42 | 81.2217 | 5  |
| -1 | 3  | 0 | 1277.59 | 80.3372 | 4  |
| -1 | 3  | 0 | 1289.30 | 80.3701 | 4  |
| -2 | -3 | 0 | 21.1420 | 2.98204 | 2  |
| -2 | -3 | 0 | 22.9484 | 2.84902 | 5  |
| -2 | -3 | 0 | 23.3612 | 3.45126 | 5  |
| -2 | -3 | 0 | 22.3472 | 2.11413 | 3  |
| -2 | -3 | 0 | 22.3343 | 2.29872 | 4  |
| -2 | 3  | 0 | 22.6516 | 1.64913 | 4  |
| -2 | 3  | 0 | 23.1662 | 1.60452 | 4  |
| -2 | 3  | 0 | 23.7841 | 1.55119 | 3  |
| -3 | -3 | 0 | 706.153 | 44.5368 | 5  |
| -3 | -3 | 0 | 693.127 | 44.5478 | 2  |
| -3 | -3 | 0 | 686.893 | 43.6101 | 4  |
| -3 | -3 | 0 | 677.224 | 43.5009 | 3  |
| -3 | 3  | 0 | 739.012 | 43.1155 | 4  |
| -3 | 3  | 0 | 718.045 | 43.0831 | 4  |
| -3 | 3  | 0 | 735.658 | 43.1091 | 3  |
| -4 | -3 | 0 | 104.397 | 8.18361 | 1  |
| -4 | -3 | 0 | 99.8897 | 7.22155 | 4  |
| -4 | -3 | 0 | 105.800 | 8.67729 | 2  |
| -4 | -3 | 0 | 106.889 | 7.49075 | 5  |
| -4 | 3  | 0 | 92.1995 | 6.46858 | 3  |
| -4 | 3  | 0 | 87.0009 | 6.35837 | 4  |
| -4 | 3  | 0 | 94.3029 | 6.39013 | 4  |
| -5 | -3 | 0 | 195.850 | 14.5301 | 1  |
| -5 | -3 | 0 | 202.263 | 15.5728 | 2  |
| -5 | 3  | 0 | 203.834 | 12.9436 | 3  |
| -5 | 3  | 0 | 199.672 | 12.5934 | 4  |
| -5 | 3  | 0 | 200.353 | 12.6038 | 4  |
| -6 | -3 | 0 | 164.371 | 12.6261 | 1  |
| -6 | 3  | 0 | 181.888 | 11.6606 | 3  |
| -7 | -3 | 0 | 107.251 | 8.40236 | 10 |
| 7  | 3  | 0 | 99.6723 | 9.79121 | 13 |
| -7 | 3  | 0 | 120.070 | 7.96886 | 7  |
| -8 | -3 | 0 | 28.9657 | 3.65300 | 8  |
| -8 | 3  | 0 | 28.7460 | 2.85737 | 8  |
| 8  | 3  | 0 | 34.9274 | 5.48782 | 13 |
| -9 | -3 | 0 | 44.3888 | 4.08810 | 8  |
| 9  | 3  | 0 | 62.0585 | 7.04517 | 13 |
| 10 | 3  | 0 | 1.40464 | 2.39530 | 13 |
| -1 | -4 | 0 | 35.9739 | 4.03294 | 5  |

|    |    |   |         |         |    |
|----|----|---|---------|---------|----|
| -1 | 4  | 0 | 37.2785 | 2.86121 | 4  |
| 1  | 4  | 0 | 37.2856 | 3.31621 | 4  |
| -1 | 4  | 0 | 39.7591 | 2.79886 | 3  |
| -1 | 4  | 0 | 35.7240 | 2.84530 | 4  |
| -2 | -4 | 0 | 45.3675 | 4.64678 | 5  |
| -2 | -4 | 0 | 44.5997 | 3.76070 | 4  |
| -2 | -4 | 0 | 43.2236 | 4.40157 | 2  |
| -2 | 4  | 0 | 51.0013 | 2.96498 | 3  |
| -3 | -4 | 0 | 8.86254 | 1.78143 | 4  |
| -3 | -4 | 0 | 9.75708 | 2.61674 | 5  |
| -3 | -4 | 0 | 8.52068 | 2.51502 | 2  |
| -3 | 4  | 0 | 15.0620 | 1.07155 | 4  |
| -3 | 4  | 0 | 12.8692 | 1.02761 | 4  |
| -3 | 4  | 0 | 12.7583 | 1.20068 | 3  |
| -4 | -4 | 0 | 33.8539 | 4.27911 | 5  |
| -4 | -4 | 0 | 37.3221 | 4.77011 | 2  |
| -4 | -4 | 0 | 31.2575 | 4.87099 | 1  |
| -4 | 4  | 0 | 36.1099 | 2.70590 | 3  |
| -4 | 4  | 0 | 35.8862 | 2.37537 | 4  |
| -4 | 4  | 0 | 34.3061 | 2.37561 | 4  |
| -5 | -4 | 0 | 8.29238 | 3.05403 | 2  |
| -5 | -4 | 0 | 7.90091 | 3.01680 | 1  |
| -5 | 4  | 0 | 7.97727 | 1.35890 | 3  |
| -6 | -4 | 0 | 7.19030 | 2.91262 | 1  |
| -6 | 4  | 0 | 10.6146 | 1.77444 | 3  |
| -6 | 4  | 0 | 10.0205 | 2.09173 | 7  |
| -6 | 4  | 0 | 9.90640 | 1.03299 | 6  |
| -7 | -4 | 0 | 20.3038 | 3.53354 | 10 |
| 7  | 4  | 0 | 15.4471 | 4.77998 | 13 |
| -7 | 4  | 0 | 28.7426 | 2.32748 | 9  |
| -7 | 4  | 0 | 26.2786 | 3.20808 | 7  |
| -8 | -4 | 0 | 4.21070 | 1.76411 | 8  |
| -8 | -4 | 0 | 4.10694 | 2.31000 | 10 |
| 8  | 4  | 0 | 7.34409 | 3.78395 | 13 |
| -9 | -4 | 0 | 35.4398 | 3.34108 | 8  |
| 9  | 4  | 0 | 30.4507 | 4.92136 | 13 |
| -9 | 4  | 0 | 32.1082 | 2.49819 | 9  |
| 10 | 4  | 0 | 13.3590 | 2.87196 | 13 |
| 0  | 5  | 0 | 4.43076 | 0.93273 | 4  |
| 0  | 5  | 0 | 3.90857 | 0.94259 | 4  |
| 0  | 5  | 0 | 4.54783 | 0.80373 | 3  |
| 1  | -5 | 0 | 41.8089 | 4.11188 | 2  |
| -1 | -5 | 0 | 58.9171 | 4.55872 | 2  |
| -1 | -5 | 0 | 59.0196 | 4.56820 | 5  |
| -1 | 5  | 0 | 43.8953 | 3.12222 | 4  |
| -1 | 5  | 0 | 45.3689 | 3.11225 | 3  |
| -1 | 5  | 0 | 46.9127 | 3.12506 | 4  |
| -2 | -5 | 0 | 248.763 | 16.6999 | 5  |
| -2 | -5 | 0 | 233.342 | 15.5455 | 4  |
| -2 | -5 | 0 | 241.066 | 16.2120 | 2  |

|    |    |   |         |         |    |
|----|----|---|---------|---------|----|
| -2 | 5  | 0 | 251.086 | 14.8064 | 3  |
| -3 | -5 | 0 | 10.1579 | 3.03267 | 5  |
| -3 | 5  | 0 | 15.1624 | 1.20626 | 3  |
| -4 | -5 | 0 | 249.932 | 17.0399 | 5  |
| -4 | -5 | 0 | 246.437 | 17.0875 | 2  |
| -4 | -5 | 0 | 236.978 | 17.0512 | 1  |
| -4 | 5  | 0 | 221.975 | 14.7948 | 3  |
| -5 | -5 | 0 | 261.829 | 18.8420 | 2  |
| -5 | -5 | 0 | 248.399 | 16.7245 | 5  |
| -5 | -5 | 0 | 259.004 | 18.4576 | 1  |
| -5 | 5  | 0 | 251.256 | 16.0693 | 3  |
| -6 | -5 | 0 | 4.67573 | 2.94242 | 1  |
| -6 | 5  | 0 | 1.48637 | 1.69258 | 7  |
| -6 | 5  | 0 | 1.39294 | 0.57612 | 6  |
| -6 | 5  | 0 | 1.54434 | 0.70348 | 9  |
| -6 | 5  | 0 | 2.24375 | 1.10782 | 3  |
| -7 | -5 | 0 | 214.022 | 13.2628 | 10 |
| -7 | 5  | 0 | 168.453 | 11.6426 | 9  |
| -7 | 5  | 0 | 170.609 | 12.4209 | 7  |
| -7 | 5  | 0 | 178.621 | 11.5075 | 6  |
| 7  | 5  | 0 | 209.005 | 14.5270 | 13 |
| -8 | -5 | 0 | 68.5184 | 5.57553 | 8  |
| -8 | -5 | 0 | 70.3486 | 6.09436 | 10 |
| -8 | 5  | 0 | 58.3886 | 4.26091 | 6  |
| 8  | 5  | 0 | 71.7575 | 8.91834 | 13 |
| -8 | 5  | 0 | 66.1142 | 5.50200 | 7  |
| -8 | 5  | 0 | 67.5291 | 4.49833 | 9  |
| -9 | -5 | 0 | 50.3308 | 4.11286 | 8  |
| 9  | 5  | 0 | 58.6869 | 6.66293 | 13 |
| -9 | 5  | 0 | 42.8403 | 3.24730 | 9  |
| -9 | 5  | 0 | 45.1127 | 3.11093 | 6  |
| 0  | -6 | 0 | 16.4135 | 2.54108 | 2  |
| 0  | 6  | 0 | 16.2073 | 1.68323 | 3  |
| 0  | 6  | 0 | 14.7093 | 1.74436 | 4  |
| 0  | 6  | 0 | 14.5199 | 1.72817 | 4  |
| -1 | -6 | 0 | 407.913 | 26.1522 | 5  |
| -1 | -6 | 0 | 401.981 | 25.8684 | 2  |
| 1  | -6 | 0 | 405.779 | 25.7486 | 2  |
| 1  | 6  | 0 | 400.223 | 25.2335 | 3  |
| 1  | 6  | 0 | 393.492 | 25.9007 | 5  |
| -1 | 6  | 0 | 419.808 | 24.8930 | 4  |
| -1 | 6  | 0 | 414.497 | 24.8874 | 4  |
| -1 | 6  | 0 | 410.655 | 24.9255 | 3  |
| 1  | 6  | 0 | 419.784 | 25.2759 | 4  |
| -2 | -6 | 0 | 94.0629 | 7.54272 | 2  |
| -2 | -6 | 0 | 85.1142 | 8.01434 | 5  |
| -2 | 6  | 0 | 109.598 | 6.05951 | 3  |
| -3 | -6 | 0 | 15.7598 | 3.36335 | 1  |
| -3 | -6 | 0 | 16.9501 | 3.30917 | 2  |
| -3 | -6 | 0 | 15.2803 | 3.49577 | 5  |

|    |    |   |         |         |    |
|----|----|---|---------|---------|----|
| -4 | -6 | 0 | 55.3450 | 6.57253 | 5  |
| -4 | -6 | 0 | 57.2099 | 6.19644 | 2  |
| -4 | -6 | 0 | 59.7286 | 6.43130 | 1  |
| -5 | -6 | 0 | 99.0487 | 9.14341 | 1  |
| -5 | -6 | 0 | 98.3091 | 8.26162 | 5  |
| -5 | -6 | 0 | 94.8660 | 9.24151 | 2  |
| -5 | 6  | 0 | 96.8700 | 6.56228 | 3  |
| -6 | -6 | 0 | 34.3785 | 5.46219 | 1  |
| -6 | -6 | 0 | 38.6829 | 6.54445 | 2  |
| -6 | 6  | 0 | 34.5223 | 3.55995 | 7  |
| -6 | 6  | 0 | 33.5182 | 3.07223 | 3  |
| -6 | 6  | 0 | 33.5076 | 2.34736 | 6  |
| -6 | 6  | 0 | 35.1201 | 2.55154 | 9  |
| -7 | -6 | 0 | 134.321 | 10.7599 | 10 |
| -7 | 6  | 0 | 152.555 | 10.2900 | 7  |
| 7  | 6  | 0 | 133.254 | 11.7623 | 13 |
| -7 | 6  | 0 | 152.065 | 9.31806 | 9  |
| -7 | 6  | 0 | 160.940 | 9.18720 | 6  |
| -8 | 6  | 0 | 14.6750 | 2.41817 | 7  |
| 8  | 6  | 0 | -0.5473 | 3.67989 | 13 |
| -9 | -6 | 0 | 18.6199 | 2.77213 | 8  |
| 9  | 6  | 0 | 17.4426 | 4.01508 | 13 |
| -9 | 6  | 0 | 23.7433 | 1.89441 | 9  |
| -9 | 6  | 0 | 22.6976 | 1.59828 | 6  |
| 0  | -7 | 0 | 2.10173 | 1.81062 | 2  |
| 0  | 7  | 0 | 3.87742 | 0.95078 | 4  |
| 0  | 7  | 0 | 3.93302 | 0.89370 | 3  |
| 0  | 7  | 0 | 2.26981 | 0.87855 | 4  |
| 1  | -7 | 0 | 128.255 | 9.29801 | 2  |
| -1 | -7 | 0 | 130.449 | 9.47604 | 2  |
| -1 | 7  | 0 | 137.087 | 8.26158 | 4  |
| -1 | 7  | 0 | 135.517 | 8.26167 | 4  |
| 1  | 7  | 0 | 125.548 | 8.65432 | 4  |
| -1 | 7  | 0 | 138.587 | 8.33143 | 3  |
| 1  | 7  | 0 | 122.197 | 8.57740 | 3  |
| -2 | -7 | 0 | 88.8690 | 8.45770 | 5  |
| -2 | -7 | 0 | 86.4925 | 7.74259 | 2  |
| -2 | 7  | 0 | 113.673 | 6.38897 | 3  |
| -2 | 7  | 0 | 110.382 | 6.42017 | 3  |
| -3 | -7 | 0 | 269.204 | 19.4250 | 1  |
| -3 | -7 | 0 | 272.528 | 19.6454 | 5  |
| -3 | -7 | 0 | 279.411 | 19.1334 | 2  |
| -3 | 7  | 0 | 294.011 | 17.1147 | 3  |
| -4 | -7 | 0 | 202.162 | 16.0860 | 5  |
| -4 | -7 | 0 | 203.341 | 15.7870 | 1  |
| -4 | -7 | 0 | 205.855 | 15.6342 | 2  |
| -4 | 7  | 0 | 233.430 | 13.2393 | 3  |
| -5 | -7 | 0 | 26.3789 | 5.02637 | 1  |
| -5 | -7 | 0 | 32.5367 | 5.34080 | 2  |
| -5 | -7 | 0 | 26.3863 | 4.39952 | 5  |

|    |    |   |         |         |    |
|----|----|---|---------|---------|----|
| -5 | 7  | 0 | 22.4749 | 1.72436 | 6  |
| -5 | 7  | 0 | 24.0413 | 2.16250 | 3  |
| -6 | -7 | 0 | 8.33562 | 2.55879 | 10 |
| -6 | -7 | 0 | 9.23943 | 3.83740 | 2  |
| -6 | -7 | 0 | 8.38194 | 4.02947 | 1  |
| -6 | 7  | 0 | 3.07208 | 0.61647 | 6  |
| -6 | 7  | 0 | 3.48866 | 0.71377 | 9  |
| -6 | 7  | 0 | 4.17389 | 1.62917 | 7  |
| -7 | -7 | 0 | 73.0813 | 7.90974 | 1  |
| -7 | -7 | 0 | 70.3613 | 6.86430 | 10 |
| -7 | 7  | 0 | 81.4410 | 4.91561 | 6  |
| -7 | 7  | 0 | 82.4345 | 5.11592 | 9  |
| -7 | 7  | 0 | 78.8852 | 6.26966 | 7  |
| 7  | 7  | 0 | 72.8714 | 8.30510 | 13 |
| -8 | -7 | 0 | 2.75698 | 1.91652 | 8  |
| -8 | -7 | 0 | 6.05482 | 2.32822 | 10 |
| 8  | 7  | 0 | 7.70060 | 4.23345 | 13 |
| -8 | 7  | 0 | 3.75479 | 0.88177 | 9  |
| -8 | 7  | 0 | 4.61216 | 0.67329 | 6  |
| -8 | 7  | 0 | 4.27216 | 1.87850 | 7  |
| -9 | -7 | 0 | 1.93143 | 1.54806 | 8  |
| 9  | 7  | 0 | 3.32708 | 3.26443 | 13 |
| -9 | 7  | 0 | 0.92963 | 0.63122 | 9  |
| -9 | 7  | 0 | 0.39507 | 0.42246 | 6  |
| 0  | -8 | 0 | 546.511 | 35.6335 | 2  |
| 0  | 8  | 0 | 571.406 | 34.8485 | 3  |
| 0  | 8  | 0 | 577.754 | 34.8634 | 4  |
| 0  | 8  | 0 | 569.187 | 34.8514 | 4  |
| 0  | 8  | 0 | 569.201 | 34.8574 | 3  |
| 1  | -8 | 0 | 47.4853 | 4.58566 | 2  |
| -1 | -8 | 0 | 60.5965 | 4.97226 | 2  |
| -1 | 8  | 0 | 49.6716 | 3.49994 | 3  |
| 1  | 8  | 0 | 57.3204 | 3.93986 | 3  |
| -1 | 8  | 0 | 46.3382 | 3.48235 | 4  |
| -1 | 8  | 0 | 48.8284 | 3.54387 | 3  |
| -1 | 8  | 0 | 46.8005 | 3.49025 | 4  |
| 2  | -8 | 0 | 5031.86 | 309.161 | 2  |
| -2 | -8 | 0 | 5297.46 | 309.417 | 2  |
| -2 | 8  | 0 | 4998.55 | 308.390 | 3  |
| -2 | 8  | 0 | 5037.45 | 308.302 | 3  |
| -3 | -8 | 0 | 29.3873 | 4.68511 | 2  |
| -3 | 8  | 0 | 44.8125 | 2.89374 | 3  |
| -3 | 8  | 0 | 44.7267 | 2.83575 | 3  |
| -4 | -8 | 0 | 386.100 | 26.2275 | 5  |
| -4 | -8 | 0 | 386.024 | 25.8033 | 1  |
| -4 | -8 | 0 | 392.699 | 25.5808 | 2  |
| -4 | 8  | 0 | 360.367 | 22.7267 | 3  |
| -4 | 8  | 0 | 337.253 | 22.7625 | 3  |
| -5 | -8 | 0 | 50.8861 | 7.24802 | 1  |
| -5 | -8 | 0 | 45.8443 | 6.47916 | 2  |

|    |    |   |         |         |    |
|----|----|---|---------|---------|----|
| -5 | 8  | 0 | 47.9338 | 3.48459 | 3  |
| -5 | 8  | 0 | 45.1585 | 2.96890 | 6  |
| -5 | 8  | 0 | 46.1733 | 3.39078 | 3  |
| -5 | 8  | 0 | 47.8207 | 2.98089 | 6  |
| -6 | -8 | 0 | 154.184 | 11.8526 | 10 |
| -6 | -8 | 0 | 168.271 | 14.5205 | 2  |
| -6 | -8 | 0 | 168.545 | 14.2561 | 1  |
| -6 | 8  | 0 | 157.240 | 11.0694 | 7  |
| -6 | 8  | 0 | 168.557 | 9.98978 | 6  |
| -6 | 8  | 0 | 160.355 | 10.1042 | 9  |
| -7 | -8 | 0 | 17.2110 | 4.57193 | 1  |
| -7 | -8 | 0 | 18.1441 | 3.53436 | 10 |
| -7 | 8  | 0 | 24.6833 | 1.93257 | 9  |
| -7 | 8  | 0 | 27.3958 | 1.73440 | 6  |
| 7  | 8  | 0 | 17.2208 | 5.14203 | 13 |
| -7 | 8  | 0 | 26.9648 | 3.47871 | 7  |
| -8 | -8 | 0 | 72.3684 | 6.49157 | 10 |
| -8 | -8 | 0 | 74.9944 | 6.08616 | 8  |
| -8 | 8  | 0 | 73.2049 | 4.83368 | 9  |
| 8  | 8  | 0 | 64.0149 | 8.33819 | 13 |
| -8 | 8  | 0 | 76.2961 | 5.98169 | 7  |
| -8 | 8  | 0 | 79.7258 | 4.70746 | 6  |
| -9 | -8 | 0 | 2.35502 | 2.12875 | 10 |
| -9 | -8 | 0 | 1.54173 | 1.53148 | 8  |
| -9 | -8 | 0 | 3.79748 | 1.83262 | 10 |
| -9 | 8  | 0 | 2.20811 | 1.07929 | 7  |
| -9 | 8  | 0 | 2.98587 | 0.39940 | 6  |
| -9 | 8  | 0 | 2.76377 | 0.38816 | 6  |
| 9  | 8  | 0 | -0.9652 | 3.21186 | 13 |
| -9 | 8  | 0 | 2.81347 | 0.63579 | 9  |
| -9 | 8  | 0 | 2.16839 | 0.55605 | 9  |
| 0  | -9 | 0 | 0.60936 | 1.59154 | 2  |
| 0  | 9  | 0 | 0.73391 | 0.77454 | 3  |
| 0  | 9  | 0 | 0.38193 | 0.95093 | 4  |
| 0  | 9  | 0 | 0.15079 | 1.01537 | 4  |
| -1 | -9 | 0 | 115.246 | 9.53740 | 2  |
| 1  | -9 | 0 | 127.281 | 9.65736 | 2  |
| 1  | 9  | 0 | 127.671 | 8.82667 | 4  |
| -1 | 9  | 0 | 136.458 | 8.36801 | 4  |
| -1 | 9  | 0 | 135.759 | 8.41325 | 3  |
| -1 | 9  | 0 | 138.599 | 8.40226 | 4  |
| 2  | -9 | 0 | 462.117 | 29.9334 | 2  |
| -2 | 9  | 0 | 463.646 | 28.4923 | 3  |
| -2 | 9  | 0 | 469.691 | 28.4561 | 3  |
| 3  | -9 | 0 | 306.246 | 20.4032 | 2  |
| -3 | -9 | 0 | 292.832 | 20.6983 | 2  |
| -3 | -9 | 0 | 277.156 | 20.9403 | 1  |
| -3 | 9  | 0 | 301.819 | 18.3728 | 3  |
| -3 | 9  | 0 | 310.564 | 18.3279 | 3  |
| -4 | -9 | 0 | 60.8486 | 7.86882 | 5  |

|    |     |   |         |         |    |
|----|-----|---|---------|---------|----|
| -4 | -9  | 0 | 66.5014 | 7.07087 | 2  |
| -4 | -9  | 0 | 61.3225 | 7.31747 | 1  |
| -4 | 9   | 0 | 64.5814 | 4.32545 | 3  |
| -4 | 9   | 0 | 65.5053 | 4.23693 | 3  |
| -5 | -9  | 0 | 4.96368 | 3.53335 | 2  |
| -5 | -9  | 0 | 3.12333 | 3.69761 | 1  |
| -5 | 9   | 0 | 7.39357 | 0.66573 | 6  |
| -5 | 9   | 0 | 8.04569 | 0.73141 | 6  |
| -5 | 9   | 0 | 6.63485 | 1.07060 | 3  |
| -5 | 9   | 0 | 7.58475 | 1.78162 | 7  |
| -5 | 9   | 0 | 7.23130 | 1.10064 | 3  |
| -6 | -9  | 0 | 8.54659 | 2.81280 | 10 |
| -6 | -9  | 0 | 6.06535 | 3.72975 | 2  |
| -6 | -9  | 0 | 5.62323 | 3.66120 | 1  |
| 6  | 9   | 0 | 10.9788 | 4.66746 | 13 |
| -7 | -9  | 0 | 87.6816 | 9.59431 | 1  |
| -7 | -9  | 0 | 83.4159 | 7.71671 | 10 |
| -7 | -9  | 0 | 78.3596 | 6.87141 | 8  |
| -7 | 9   | 0 | 94.3256 | 6.97509 | 7  |
| -7 | 9   | 0 | 93.3049 | 5.54298 | 6  |
| 7  | 9   | 0 | 84.1436 | 9.16672 | 13 |
| -7 | 9   | 0 | 92.9620 | 5.68675 | 9  |
| -8 | -9  | 0 | 86.0209 | 6.71135 | 8  |
| -8 | -9  | 0 | 84.3429 | 7.25099 | 10 |
| -8 | 9   | 0 | 82.5045 | 5.31542 | 6  |
| -8 | 9   | 0 | 88.7621 | 5.31758 | 6  |
| -8 | 9   | 0 | 84.8241 | 6.58578 | 7  |
| -8 | 9   | 0 | 84.4808 | 5.45204 | 9  |
| 8  | 9   | 0 | 86.6297 | 8.94024 | 13 |
| -9 | -9  | 0 | 32.3711 | 3.59552 | 10 |
| -9 | -9  | 0 | 31.9772 | 3.23923 | 8  |
| -9 | -9  | 0 | 34.6557 | 3.51148 | 10 |
| 9  | 9   | 0 | 34.3331 | 5.40300 | 13 |
| -9 | 9   | 0 | 41.0448 | 2.49106 | 9  |
| -9 | 9   | 0 | 43.7661 | 3.48655 | 7  |
| -9 | 9   | 0 | 40.5991 | 2.49225 | 9  |
| 0  | -10 | 0 | 7.95365 | 2.65838 | 2  |
| 0  | 10  | 0 | 7.29134 | 1.33269 | 4  |
| 0  | 10  | 0 | 7.82383 | 1.32361 | 3  |
| 1  | -10 | 0 | 54.0309 | 5.36416 | 2  |
| -1 | -10 | 0 | 53.5515 | 5.74669 | 2  |
| -1 | 10  | 0 | 59.7407 | 4.13507 | 3  |
| -1 | 10  | 0 | 53.9401 | 4.09738 | 4  |
| 1  | 10  | 0 | 52.5570 | 4.72421 | 4  |
| -1 | 10  | 0 | 56.7257 | 4.13460 | 3  |
| -1 | 10  | 0 | 63.2691 | 4.12844 | 4  |
| -2 | -10 | 0 | 55.4608 | 5.61018 | 2  |
| 2  | -10 | 0 | 54.2485 | 5.46550 | 2  |
| -2 | 10  | 0 | 51.7921 | 3.79296 | 3  |
| -2 | 10  | 0 | 53.8765 | 3.72164 | 3  |

|    |     |   |         |         |    |
|----|-----|---|---------|---------|----|
| -3 | -10 | 0 | 147.127 | 11.1700 | 2  |
| 3  | -10 | 0 | 136.700 | 10.6421 | 2  |
| -3 | -10 | 0 | 132.321 | 11.7335 | 1  |
| -3 | 10  | 0 | 129.053 | 8.56576 | 3  |
| -3 | 10  | 0 | 134.566 | 8.51933 | 3  |
| -4 | -10 | 0 | 46.1945 | 6.63660 | 1  |
| -4 | -10 | 0 | 45.9594 | 6.25121 | 2  |
| 4  | -10 | 0 | 55.7250 | 6.00406 | 2  |
| -4 | 10  | 0 | 48.4256 | 3.44577 | 3  |
| -4 | 10  | 0 | 51.0469 | 3.37970 | 3  |
| 5  | -10 | 0 | 45.3145 | 6.91141 | 2  |
| -5 | -10 | 0 | 54.7805 | 7.08634 | 2  |
| -5 | -10 | 0 | 52.8065 | 7.40480 | 1  |
| -5 | 10  | 0 | 45.4720 | 2.91404 | 6  |
| -5 | 10  | 0 | 50.4273 | 4.21237 | 7  |
| -5 | 10  | 0 | 44.8825 | 3.22193 | 3  |
| -5 | 10  | 0 | 43.0568 | 2.90381 | 6  |
| -5 | 10  | 0 | 46.3185 | 3.03070 | 9  |
| -5 | 10  | 0 | 45.9473 | 3.30884 | 3  |
| -6 | -10 | 0 | 2.15678 | 3.38419 | 1  |
| -6 | -10 | 0 | -2.3381 | 2.47167 | 10 |
| -6 | 10  | 0 | 0.03783 | 0.52696 | 9  |
| -6 | 10  | 0 | -1.7647 | 1.67382 | 7  |
| -6 | 10  | 0 | 0.62992 | 0.40627 | 6  |
| 6  | 10  | 0 | -2.8070 | 4.63568 | 13 |
| -6 | 10  | 0 | 0.70323 | 0.36277 | 6  |
| -7 | -10 | 0 | 19.7925 | 3.63082 | 10 |
| 7  | 10  | 0 | 15.5241 | 4.32468 | 13 |
| -7 | 10  | 0 | 12.2570 | 1.02261 | 6  |
| -7 | 10  | 0 | 11.1378 | 0.98474 | 6  |
| -7 | 10  | 0 | 11.0713 | 1.16376 | 9  |
| -7 | 10  | 0 | 12.0277 | 2.50206 | 7  |
| -8 | -10 | 0 | 12.1542 | 3.04937 | 10 |
| -8 | -10 | 0 | 12.7217 | 2.56458 | 8  |
| -8 | 10  | 0 | 18.2319 | 1.24473 | 6  |
| -8 | 10  | 0 | 18.2420 | 1.24444 | 6  |
| 8  | 10  | 0 | 15.1857 | 4.14269 | 13 |
| -8 | 10  | 0 | 21.3358 | 3.05413 | 7  |
| -8 | 10  | 0 | 18.2841 | 1.44208 | 9  |
| -9 | -10 | 0 | 1.83152 | 1.62633 | 10 |
| -9 | -10 | 0 | 0.99319 | 1.43190 | 8  |
| -9 | -10 | 0 | 0.60883 | 1.85607 | 10 |
| 9  | 10  | 0 | 0.44893 | 3.23726 | 13 |
| 0  | -11 | 0 | 2.91102 | 2.51751 | 2  |
| 0  | 11  | 0 | 2.46184 | 1.07737 | 4  |
| 0  | 11  | 0 | 1.92883 | 1.17825 | 3  |
| 1  | -11 | 0 | 77.4376 | 6.78577 | 2  |
| -1 | -11 | 0 | 61.1260 | 6.82491 | 2  |
| -1 | 11  | 0 | 80.1543 | 5.21618 | 4  |
| -1 | 11  | 0 | 77.9764 | 5.23131 | 4  |



|    |     |   |         |         |    |
|----|-----|---|---------|---------|----|
| -1 | 11  | 0 | 79.8886 | 5.37632 | 3  |
| -2 | -11 | 0 | 59.8174 | 6.65183 | 2  |
| 2  | -11 | 0 | 81.2283 | 7.02771 | 2  |
| -2 | 11  | 0 | 79.3803 | 5.04166 | 3  |
| -3 | -11 | 0 | 78.0211 | 7.79795 | 2  |
| -3 | -11 | 0 | 74.4455 | 8.33128 | 1  |
| 3  | -11 | 0 | 82.6614 | 7.48175 | 2  |
| -3 | 11  | 0 | 84.8813 | 5.44151 | 3  |
| -3 | 11  | 0 | 81.9793 | 5.34559 | 3  |
| 4  | -11 | 0 | 55.2730 | 6.32584 | 2  |
| -4 | -11 | 0 | 49.0834 | 7.08557 | 1  |
| -4 | -11 | 0 | 47.0395 | 6.51880 | 2  |
| -4 | 11  | 0 | 55.0084 | 3.30281 | 6  |
| -4 | 11  | 0 | 54.3641 | 3.67933 | 3  |
| -4 | 11  | 0 | 52.9069 | 3.60138 | 3  |
| -5 | -11 | 0 | 329.491 | 24.7108 | 1  |
| -5 | -11 | 0 | 332.389 | 24.3368 | 2  |
| -5 | 11  | 0 | 332.577 | 21.1559 | 7  |
| -5 | 11  | 0 | 330.956 | 20.1337 | 6  |
| -5 | 11  | 0 | 329.158 | 20.2077 | 9  |
| -5 | 11  | 0 | 328.296 | 20.2298 | 9  |
| -5 | 11  | 0 | 348.062 | 20.1296 | 6  |
| -5 | 11  | 0 | 322.217 | 20.3964 | 3  |
| -6 | -11 | 0 | 4.73040 | 4.75051 | 1  |
| -6 | -11 | 0 | 5.67326 | 2.76450 | 10 |
| 6  | 11  | 0 | 5.85169 | 3.70154 | 13 |
| -6 | 11  | 0 | 0.63560 | 1.70980 | 7  |
| -6 | 11  | 0 | 0.48044 | 0.33276 | 6  |
| -6 | 11  | 0 | -2.5391 | 2.40022 | 12 |
| -6 | 11  | 0 | 0.31211 | 0.44723 | 9  |
| -6 | 11  | 0 | 0.16736 | 0.31771 | 6  |
| -7 | -11 | 0 | 39.8250 | 5.44472 | 10 |
| -7 | -11 | 0 | 35.1193 | 6.63423 | 1  |
| -7 | 11  | 0 | 41.9506 | 2.61770 | 6  |
| -7 | 11  | 0 | 45.6245 | 4.42785 | 7  |
| -7 | 11  | 0 | 42.1750 | 2.62475 | 6  |
| -7 | 11  | 0 | 42.1108 | 2.75339 | 9  |
| 7  | 11  | 0 | 32.0746 | 5.22849 | 13 |
| -8 | -11 | 0 | 3.13145 | 2.49676 | 10 |
| -8 | -11 | 0 | 3.41600 | 1.97186 | 8  |
| -8 | 11  | 0 | 1.65600 | 0.45661 | 9  |
| -8 | 11  | 0 | 1.81884 | 0.54882 | 9  |
| 8  | 11  | 0 | 2.73430 | 3.42019 | 13 |
| -8 | 11  | 0 | 2.25260 | 1.72070 | 7  |
| -9 | -11 | 0 | 6.68705 | 1.80338 | 10 |
| -9 | -11 | 0 | 6.75269 | 2.09943 | 10 |
| 9  | 11  | 0 | 5.33938 | 3.08755 | 13 |
| 0  | -12 | 0 | 283.462 | 19.2312 | 2  |
| 0  | 12  | 0 | 274.680 | 17.8546 | 3  |
| 0  | 12  | 0 | 281.097 | 17.8000 | 4  |

|    |     |   |         |         |    |
|----|-----|---|---------|---------|----|
| 1  | -12 | 0 | 82.6964 | 7.44676 | 2  |
| -1 | -12 | 0 | 81.2708 | 7.68987 | 2  |
| -1 | 12  | 0 | 82.3968 | 5.73557 | 4  |
| -1 | 12  | 0 | 83.6040 | 5.72226 | 4  |
| -1 | 12  | 0 | 87.7431 | 5.93339 | 3  |
| -2 | -12 | 0 | 13.4324 | 3.19448 | 2  |
| 2  | -12 | 0 | 16.7445 | 3.34227 | 2  |
| -2 | 12  | 0 | 17.2118 | 1.89939 | 3  |
| -2 | 12  | 0 | 16.6353 | 1.75315 | 3  |
| -3 | -12 | 0 | 16.6030 | 3.76125 | 2  |
| 3  | -12 | 0 | 15.0490 | 3.81275 | 2  |
| -3 | 12  | 0 | 16.5351 | 1.64218 | 3  |
| -3 | 12  | 0 | 14.2976 | 1.52878 | 3  |
| -4 | -12 | 0 | 16.6094 | 4.04108 | 2  |
| -4 | -12 | 0 | 16.1757 | 4.65584 | 1  |
| -4 | 12  | 0 | 14.5692 | 1.51676 | 3  |
| -4 | 12  | 0 | 16.2503 | 2.50289 | 7  |
| -4 | 12  | 0 | 15.4183 | 1.11335 | 6  |
| -4 | 12  | 0 | 15.8891 | 1.44049 | 3  |
| -4 | 12  | 0 | 15.8818 | 1.08809 | 6  |
| -5 | -12 | 0 | 45.7621 | 5.50132 | 10 |
| -5 | -12 | 0 | 35.3374 | 6.93305 | 1  |
| -5 | -12 | 0 | 38.4898 | 6.98737 | 2  |
| -5 | 12  | 0 | 30.8034 | 2.25408 | 9  |
| -5 | 12  | 0 | 28.3740 | 3.64896 | 7  |
| -5 | 12  | 0 | 32.9046 | 2.10503 | 6  |
| -5 | 12  | 0 | 31.7814 | 2.11294 | 6  |
| -5 | 12  | 0 | 33.9924 | 2.28612 | 9  |
| -6 | -12 | 0 | 52.3741 | 9.01994 | 1  |
| -6 | -12 | 0 | 52.1020 | 5.32596 | 10 |
| -6 | 12  | 0 | 47.6575 | 2.93345 | 6  |
| 6  | 12  | 0 | 42.3081 | 7.35808 | 13 |
| -6 | 12  | 0 | 42.6789 | 5.31679 | 12 |
| -6 | 12  | 0 | 45.1015 | 3.09573 | 9  |
| -6 | 12  | 0 | 46.1942 | 2.92257 | 6  |
| -6 | 12  | 0 | 45.7653 | 3.05694 | 9  |
| -6 | 12  | 0 | 46.5986 | 4.60554 | 7  |
| -7 | -12 | 0 | 8.31767 | 4.16452 | 1  |
| -7 | -12 | 0 | 2.74139 | 2.95015 | 10 |
| -7 | 12  | 0 | 4.76416 | 0.44556 | 6  |
| -7 | 12  | 0 | 5.54641 | 1.78177 | 7  |
| 7  | 12  | 0 | 2.30968 | 3.73317 | 13 |
| -7 | 12  | 0 | 5.15847 | 0.52142 | 6  |
| -7 | 12  | 0 | 3.42355 | 0.75215 | 9  |
| -7 | 12  | 0 | 4.86870 | 0.61338 | 9  |
| -8 | -12 | 0 | 8.99233 | 2.20535 | 8  |
| -8 | 12  | 0 | 5.58179 | 1.92326 | 7  |
| 8  | 12  | 0 | 3.24659 | 3.81787 | 13 |
| -9 | -12 | 0 | 1.66363 | 1.59710 | 10 |
| -9 | -12 | 0 | 2.92833 | 2.00283 | 10 |

|    |     |   |         |         |    |
|----|-----|---|---------|---------|----|
| 9  | 12  | 0 | 3.58094 | 2.74587 | 13 |
| 0  | -13 | 0 | -1.6277 | 2.38878 | 2  |
| 0  | 13  | 0 | 0.50397 | 1.19382 | 4  |
| -1 | -13 | 0 | 0.18573 | 1.82554 | 2  |
| 1  | -13 | 0 | 0.66855 | 2.43662 | 2  |
| -1 | 13  | 0 | 0.80517 | 0.90362 | 4  |
| -1 | 13  | 0 | -0.0399 | 0.75795 | 4  |
| -1 | 13  | 0 | 0.32317 | 0.94816 | 3  |
| -2 | -13 | 0 | 139.691 | 11.0463 | 2  |
| -2 | 13  | 0 | 133.189 | 8.94965 | 3  |
| -3 | -13 | 0 | 7.86893 | 3.11676 | 2  |
| -3 | 13  | 0 | 4.43963 | 1.00084 | 3  |
| -3 | 13  | 0 | 5.71451 | 1.02280 | 3  |
| -4 | -13 | 0 | 353.756 | 25.1567 | 2  |
| -4 | -13 | 0 | 349.711 | 25.9520 | 1  |
| -4 | 13  | 0 | 327.183 | 21.5098 | 3  |
| -4 | 13  | 0 | 350.809 | 22.2287 | 7  |
| -4 | 13  | 0 | 354.445 | 21.4959 | 3  |
| -4 | 13  | 0 | 350.335 | 21.2208 | 6  |
| -4 | 13  | 0 | 358.677 | 21.3486 | 9  |
| -4 | 13  | 0 | 350.811 | 21.1988 | 6  |
| -5 | -13 | 0 | 1.78816 | 2.67122 | 10 |
| -5 | -13 | 0 | 3.26892 | 3.67978 | 2  |
| -5 | -13 | 0 | 1.62589 | 3.84525 | 1  |
| -5 | 13  | 0 | 5.38374 | 1.89587 | 7  |
| -5 | 13  | 0 | 5.80168 | 0.59422 | 6  |
| -5 | 13  | 0 | 5.81150 | 0.70945 | 9  |
| -5 | 13  | 0 | 5.58228 | 0.71693 | 9  |
| -5 | 13  | 0 | 5.13556 | 2.77600 | 12 |
| -5 | 13  | 0 | 5.78290 | 0.57883 | 6  |
| -6 | -13 | 0 | 39.4655 | 5.24939 | 10 |
| -6 | -13 | 0 | 41.1612 | 8.62364 | 1  |
| -6 | 13  | 0 | 25.5018 | 1.73631 | 6  |
| -6 | 13  | 0 | 29.1893 | 4.58359 | 12 |
| -6 | 13  | 0 | 25.2604 | 1.87173 | 9  |
| 6  | 13  | 0 | 32.1014 | 5.66471 | 13 |
| -6 | 13  | 0 | 26.2041 | 1.93083 | 9  |
| -6 | 13  | 0 | 27.4723 | 1.75544 | 6  |
| -6 | 13  | 0 | 27.4458 | 3.70380 | 7  |
| -7 | -13 | 0 | 5.28268 | 3.00381 | 10 |
| -7 | 13  | 0 | 3.40701 | 0.43587 | 9  |
| 7  | 13  | 0 | 3.29744 | 3.18338 | 13 |
| -7 | 13  | 0 | 4.85959 | 1.66261 | 7  |
| -7 | 13  | 0 | 3.55592 | 0.51593 | 9  |
| -8 | -13 | 0 | 24.0909 | 3.38065 | 10 |
| 8  | 13  | 0 | 31.9320 | 5.14300 | 13 |
| 0  | -14 | 0 | 168.404 | 13.0454 | 2  |
| 0  | 14  | 0 | 169.078 | 11.2996 | 4  |
| -1 | -14 | 0 | 61.6308 | 7.05101 | 2  |
| -1 | 14  | 0 | 69.4354 | 4.92058 | 4  |

|    |     |   |         |         |    |
|----|-----|---|---------|---------|----|
| -1 | 14  | 0 | 72.1764 | 5.26726 | 3  |
| -2 | -14 | 0 | 33.4747 | 5.31086 | 2  |
| -2 | 14  | 0 | 32.3499 | 2.94949 | 3  |
| -3 | -14 | 0 | 409.468 | 26.9757 | 2  |
| -3 | 14  | 0 | 367.016 | 23.6939 | 3  |
| -3 | 14  | 0 | 374.455 | 23.1885 | 6  |
| -4 | -14 | 0 | 159.150 | 14.9711 | 1  |
| -4 | -14 | 0 | 144.893 | 13.8063 | 2  |
| -4 | 14  | 0 | 169.505 | 10.2093 | 6  |
| -4 | 14  | 0 | 172.272 | 10.3782 | 9  |
| -4 | 14  | 0 | 164.178 | 10.5276 | 3  |
| -4 | 14  | 0 | 178.470 | 10.1903 | 6  |
| -4 | 14  | 0 | 165.958 | 11.2649 | 7  |
| -5 | -14 | 0 | 91.3140 | 8.45534 | 10 |
| -5 | -14 | 0 | 101.266 | 11.2013 | 1  |
| -5 | 14  | 0 | 87.3568 | 5.73533 | 9  |
| -5 | 14  | 0 | 93.1606 | 5.61570 | 6  |
| -5 | 14  | 0 | 87.9994 | 7.77872 | 12 |
| -5 | 14  | 0 | 94.3845 | 7.04052 | 7  |
| -5 | 14  | 0 | 91.1765 | 5.61222 | 6  |
| -5 | 14  | 0 | 89.4648 | 5.75145 | 9  |
| -6 | -14 | 0 | 53.5137 | 8.80411 | 1  |
| -6 | -14 | 0 | 50.3768 | 6.40235 | 10 |
| -6 | 14  | 0 | 58.3151 | 4.94290 | 7  |
| -6 | 14  | 0 | 60.5797 | 3.63751 | 9  |
| -6 | 14  | 0 | 57.7031 | 3.67599 | 9  |
| -7 | -14 | 0 | 42.6229 | 5.57298 | 10 |
| -7 | 14  | 0 | 38.9582 | 3.87842 | 7  |
| -8 | -14 | 0 | 15.5262 | 2.71192 | 10 |
| 0  | 15  | 0 | 0.67708 | 1.33527 | 4  |
| -1 | -15 | 0 | 7.91262 | 5.09693 | 2  |
| -1 | 15  | 0 | 8.42529 | 1.68826 | 3  |
| -1 | 15  | 0 | 6.61446 | 1.40197 | 4  |
| -1 | 15  | 0 | 5.71799 | 1.32568 | 4  |
| -2 | -15 | 0 | 110.065 | 9.73116 | 2  |
| -2 | 15  | 0 | 104.504 | 7.45221 | 3  |
| -3 | -15 | 0 | 116.534 | 11.7903 | 2  |
| -3 | 15  | 0 | 135.564 | 8.83825 | 3  |
| -3 | 15  | 0 | 142.620 | 8.23634 | 6  |
| -3 | 15  | 0 | 132.060 | 8.45475 | 9  |
| -4 | -15 | 0 | 24.3238 | 5.67841 | 2  |
| -4 | -15 | 0 | 30.3054 | 8.31587 | 1  |
| -4 | 15  | 0 | 28.2694 | 2.23438 | 9  |
| 4  | 15  | 0 | 22.4647 | 4.62952 | 10 |
| -4 | 15  | 0 | 27.8608 | 3.47236 | 7  |
| -4 | 15  | 0 | 27.5345 | 1.96110 | 6  |
| -4 | 15  | 0 | 38.5970 | 5.32476 | 12 |
| -4 | 15  | 0 | 32.0928 | 1.94539 | 6  |
| -5 | -15 | 0 | 12.5625 | 5.15885 | 1  |
| -5 | 15  | 0 | 11.5533 | 1.16235 | 9  |

|    |     |   |         |         |    |
|----|-----|---|---------|---------|----|
| -5 | 15  | 0 | 12.2952 | 0.89449 | 6  |
| -5 | 15  | 0 | 10.8824 | 1.06637 | 9  |
| -5 | 15  | 0 | 12.2627 | 3.74192 | 12 |
| -5 | 15  | 0 | 11.8725 | 2.43757 | 7  |
| -5 | 15  | 0 | 11.3315 | 0.88733 | 6  |
| -6 | -15 | 0 | 143.995 | 13.7652 | 1  |
| -6 | -15 | 0 | 138.688 | 10.7095 | 10 |
| -6 | 15  | 0 | 122.075 | 7.82744 | 9  |
| -6 | 15  | 0 | 122.986 | 7.82611 | 9  |
| -6 | 15  | 0 | 127.104 | 9.31255 | 7  |
| -7 | -15 | 0 | 18.1164 | 3.76920 | 10 |
| -8 | -15 | 0 | 21.8267 | 3.61755 | 10 |
| 0  | 16  | 0 | 520.329 | 32.6724 | 4  |
| -1 | 16  | 0 | 4.34009 | 1.24210 | 4  |
| -1 | 16  | 0 | 6.26161 | 1.48366 | 4  |
| -2 | 16  | 0 | 140.108 | 8.80271 | 6  |
| -2 | 16  | 0 | 144.475 | 9.72294 | 3  |
| 3  | 16  | 0 | 75.3602 | 8.19774 | 10 |
| -3 | 16  | 0 | 59.9346 | 4.27964 | 9  |
| -3 | 16  | 0 | 59.4679 | 3.94647 | 6  |
| -4 | -16 | 0 | 105.160 | 8.83586 | 13 |
| 4  | 16  | 0 | 111.071 | 10.2161 | 10 |
| -4 | 16  | 0 | 110.294 | 6.92001 | 6  |
| -4 | 16  | 0 | 111.401 | 6.94919 | 6  |
| -4 | 16  | 0 | 121.033 | 7.21464 | 9  |
| -5 | -16 | 0 | 16.4655 | 5.62935 | 1  |
| 5  | 16  | 0 | 13.5434 | 4.55480 | 10 |
| -5 | 16  | 0 | 15.5140 | 1.10380 | 6  |
| -5 | 16  | 0 | 16.2937 | 1.28956 | 9  |
| -5 | 16  | 0 | 15.3556 | 1.36869 | 9  |
| -5 | 16  | 0 | 16.3753 | 1.10353 | 6  |
| -6 | -16 | 0 | 29.4942 | 6.87913 | 1  |
| -6 | -16 | 0 | 35.9607 | 4.80094 | 10 |
| -7 | -16 | 0 | 210.925 | 14.9510 | 10 |
| -8 | -16 | 0 | 16.4265 | 2.59333 | 10 |
| 0  | 17  | 0 | 1.80774 | 1.43121 | 4  |
| -1 | 17  | 0 | 262.493 | 16.6411 | 4  |
| -2 | 17  | 0 | 69.9340 | 4.83496 | 9  |
| -2 | 17  | 0 | 68.5915 | 5.45857 | 3  |
| -3 | -17 | 0 | 40.2088 | 4.64090 | 13 |
| 3  | 17  | 0 | 40.4597 | 6.32807 | 10 |
| -3 | 17  | 0 | 40.9351 | 2.68278 | 6  |
| -3 | 17  | 0 | 39.2742 | 3.15269 | 9  |
| -4 | -17 | 0 | 76.1980 | 7.28184 | 13 |
| -4 | 17  | 0 | 99.9702 | 5.71003 | 6  |
| 4  | 17  | 0 | 78.9825 | 9.02727 | 10 |
| -4 | 17  | 0 | 95.2755 | 5.74201 | 6  |
| -4 | 17  | 0 | 98.5366 | 6.00415 | 9  |
| -5 | -17 | 0 | 11.8616 | 5.22426 | 1  |
| -5 | 17  | 0 | 8.93925 | 0.69446 | 6  |

|    |     |   |         |         |    |
|----|-----|---|---------|---------|----|
| -5 | 17  | 0 | 8.52956 | 0.92044 | 9  |
| -5 | 17  | 0 | 8.40046 | 0.67228 | 6  |
| 5  | 17  | 0 | 9.05574 | 4.25651 | 10 |
| -5 | 17  | 0 | 7.79460 | 1.06071 | 9  |
| -6 | -17 | 0 | 145.443 | 11.5467 | 10 |
| -7 | -17 | 0 | 4.93684 | 2.21281 | 10 |
| -8 | -17 | 0 | 3.86773 | 2.01171 | 10 |
| -8 | -17 | 0 | 4.67535 | 2.34806 | 10 |
| 1  | 18  | 0 | 30.7291 | 4.94284 | 10 |
| -1 | 18  | 0 | 37.1241 | 3.52672 | 11 |
| 2  | 18  | 0 | 66.4302 | 7.03439 | 10 |
| -2 | 18  | 0 | 57.3808 | 4.54527 | 9  |
| -3 | -18 | 0 | 36.4636 | 5.36024 | 13 |
| 3  | 18  | 0 | 52.2905 | 6.93681 | 10 |
| -3 | 18  | 0 | 41.2498 | 2.79352 | 6  |
| -3 | 18  | 0 | 43.5898 | 3.34662 | 9  |
| -4 | -18 | 0 | 5.82541 | 2.39101 | 13 |
| -4 | 18  | 0 | 11.4583 | 0.93737 | 6  |
| -4 | 18  | 0 | 11.5643 | 1.45975 | 9  |
| 4  | 18  | 0 | 4.90722 | 3.70989 | 10 |
| -4 | 18  | 0 | 9.60553 | 0.99888 | 6  |
| -5 | -18 | 0 | 23.0435 | 6.09391 | 1  |
| -5 | 18  | 0 | 16.4203 | 1.33125 | 9  |
| 5  | 18  | 0 | 26.0192 | 5.63432 | 10 |
| -5 | 18  | 0 | 14.0812 | 1.41900 | 9  |
| -5 | 18  | 0 | 18.5144 | 1.12766 | 6  |
| -5 | 18  | 0 | 16.8993 | 1.12170 | 6  |
| -6 | -18 | 0 | 16.7218 | 3.16433 | 10 |
| 6  | 18  | 0 | 15.9102 | 3.73525 | 10 |
| -7 | -18 | 0 | 4.33004 | 2.67908 | 10 |
| 0  | 19  | 0 | -0.6468 | 2.11600 | 10 |
| -1 | -19 | 0 | 4.97690 | 2.94753 | 13 |
| -1 | 19  | 0 | 1.14614 | 1.34746 | 11 |
| 1  | 19  | 0 | 6.96821 | 3.40551 | 10 |
| -2 | -19 | 0 | 226.953 | 15.0219 | 13 |
| -2 | 19  | 0 | 183.784 | 13.8285 | 9  |
| 2  | 19  | 0 | 242.478 | 15.9136 | 10 |
| -3 | -19 | 0 | 133.966 | 10.3980 | 13 |
| -3 | 19  | 0 | 135.088 | 8.41240 | 6  |
| 3  | 19  | 0 | 139.683 | 11.4971 | 10 |
| -3 | 19  | 0 | 135.170 | 8.84337 | 9  |
| -4 | -19 | 0 | 19.7495 | 3.19153 | 13 |
| 4  | 19  | 0 | 22.5737 | 4.81536 | 10 |
| -4 | 19  | 0 | 17.8885 | 1.87909 | 9  |
| -4 | 19  | 0 | 20.5781 | 1.43062 | 6  |
| -4 | 19  | 0 | 17.5837 | 1.41673 | 6  |
| -5 | 19  | 0 | 38.5328 | 2.62407 | 9  |
| 5  | 19  | 0 | 37.3488 | 6.54706 | 10 |
| -5 | 19  | 0 | 41.2806 | 2.59148 | 9  |
| 6  | 19  | 0 | 56.3471 | 7.01563 | 10 |

|    |     |   |         |         |    |
|----|-----|---|---------|---------|----|
| -7 | -19 | 0 | 7.89409 | 2.67174 | 10 |
| 0  | -20 | 0 | 5.91716 | 2.73010 | 13 |
| -1 | -20 | 0 | 34.4953 | 4.84607 | 13 |
| -1 | 20  | 0 | 29.0577 | 2.91909 | 11 |
| 1  | 20  | 0 | 32.5828 | 5.22459 | 10 |
| -2 | -20 | 0 | 35.8467 | 5.12733 | 13 |
| 2  | 20  | 0 | 30.7250 | 6.16035 | 10 |
| -3 | -20 | 0 | 121.290 | 8.98970 | 13 |
| -3 | 20  | 0 | 111.093 | 7.47912 | 9  |
| -3 | 20  | 0 | 104.534 | 7.01173 | 6  |
| 3  | 20  | 0 | 117.466 | 10.0487 | 10 |
| -4 | -20 | 0 | 0.23845 | 2.90947 | 13 |
| -4 | 20  | 0 | 1.69301 | 0.82838 | 9  |
| 4  | 20  | 0 | 6.51928 | 3.93142 | 10 |
| -4 | 20  | 0 | 1.19781 | 0.46123 | 6  |
| -4 | 20  | 0 | 1.22831 | 0.47192 | 6  |
| -5 | 20  | 0 | 3.26133 | 0.41913 | 9  |
| 5  | 20  | 0 | 3.56604 | 3.70639 | 10 |
| -5 | 20  | 0 | 3.75375 | 0.44939 | 9  |
| 6  | 20  | 0 | 28.7206 | 5.43030 | 10 |
| 0  | -21 | 0 | -0.5328 | 2.03505 | 13 |
| 0  | 21  | 0 | 0.58426 | 1.87417 | 11 |
| -1 | -21 | 0 | 1.04330 | 2.75670 | 13 |
| -1 | 21  | 0 | 4.82998 | 1.13784 | 11 |
| 1  | 21  | 0 | 1.44385 | 2.69757 | 10 |
| -1 | 21  | 0 | 5.15206 | 1.11316 | 11 |
| -2 | -21 | 0 | 46.7602 | 5.34616 | 13 |
| 2  | 21  | 0 | 44.6287 | 5.78212 | 10 |
| -3 | -21 | 0 | 0.99757 | 2.46968 | 13 |
| -3 | 21  | 0 | 1.40221 | 1.14753 | 9  |
| 3  | 21  | 0 | 2.26794 | 3.29262 | 10 |
| -3 | 21  | 0 | 2.31426 | 0.53732 | 6  |
| -4 | -21 | 0 | 17.1713 | 3.09278 | 13 |
| -4 | 21  | 0 | 14.4354 | 1.64005 | 9  |
| 4  | 21  | 0 | 9.55709 | 4.06083 | 10 |
| -4 | 21  | 0 | 17.6655 | 1.23460 | 6  |
| -4 | 21  | 0 | 14.8919 | 1.22232 | 6  |
| 5  | 21  | 0 | 14.0904 | 4.21171 | 10 |
| 6  | 21  | 0 | 7.27592 | 3.33328 | 10 |
| 0  | -22 | 0 | 118.828 | 9.18473 | 13 |
| 0  | 22  | 0 | 120.077 | 8.43562 | 11 |
| -1 | -22 | 0 | 276.844 | 17.2698 | 13 |
| -1 | 22  | 0 | 247.596 | 15.6383 | 11 |
| 1  | 22  | 0 | 264.298 | 17.3369 | 10 |
| -1 | 22  | 0 | 236.285 | 15.6361 | 11 |
| -2 | -22 | 0 | 18.9031 | 4.06563 | 13 |
| 2  | 22  | 0 | 25.2690 | 4.26579 | 10 |
| -3 | -22 | 0 | 0.75319 | 2.23136 | 13 |
| -3 | 22  | 0 | 1.71359 | 0.95079 | 9  |
| -3 | 22  | 0 | 2.33741 | 0.51879 | 6  |

|    |     |   |         |         |    |
|----|-----|---|---------|---------|----|
| 3  | 22  | 0 | 1.05037 | 2.82345 | 10 |
| -4 | -22 | 0 | 1.56880 | 2.28440 | 13 |
| -4 | 22  | 0 | 4.79669 | 0.84591 | 9  |
| 4  | 22  | 0 | 3.66331 | 2.43779 | 10 |
| -4 | 22  | 0 | 4.65495 | 0.51011 | 6  |
| -4 | 22  | 0 | 4.06514 | 0.49449 | 6  |
| 5  | 22  | 0 | 44.0276 | 5.15520 | 10 |
| 6  | 22  | 0 | 23.8341 | 4.21430 | 10 |
| 0  | 23  | 0 | 1.09423 | 1.22057 | 11 |
| -1 | -23 | 0 | 1.99065 | 3.10635 | 13 |
| 1  | 23  | 0 | 1.51059 | 2.18419 | 10 |
| -2 | -23 | 0 | 202.046 | 14.0381 | 13 |
| 2  | 23  | 0 | 202.825 | 14.5627 | 10 |
| -3 | -23 | 0 | 47.5195 | 5.32705 | 13 |
| -3 | 23  | 0 | 47.5708 | 3.61009 | 9  |
| -3 | 23  | 0 | 50.6317 | 3.22874 | 6  |
| 3  | 23  | 0 | 49.0094 | 5.80807 | 10 |
| -4 | -23 | 0 | 2.87542 | 2.08139 | 13 |
| -4 | 23  | 0 | 3.05436 | 0.38820 | 6  |
| -4 | 23  | 0 | 2.54179 | 0.37825 | 6  |
| -4 | 23  | 0 | 2.87687 | 0.72937 | 9  |
| 4  | 23  | 0 | 3.48011 | 2.17531 | 10 |
| 5  | 23  | 0 | 5.81839 | 2.24679 | 10 |
| 0  | -24 | 0 | 69.5334 | 6.67951 | 13 |
| 0  | 24  | 0 | 58.9148 | 4.44120 | 11 |
| 0  | 24  | 0 | 67.4249 | 4.59820 | 11 |
| -1 | -24 | 0 | 5.10330 | 2.42065 | 13 |
| 1  | 24  | 0 | 7.27131 | 1.80724 | 11 |
| -2 | -24 | 0 | 3.95384 | 2.33246 | 13 |
| 2  | 24  | 0 | 4.30693 | 2.77265 | 10 |
| 3  | 24  | 0 | 4.45291 | 2.66442 | 10 |
| -3 | 24  | 0 | 7.72178 | 1.15218 | 9  |
| -3 | 24  | 0 | 7.41109 | 0.75951 | 6  |
| -4 | 24  | 0 | 17.9717 | 1.37667 | 9  |
| 4  | 24  | 0 | 12.9088 | 3.21850 | 10 |
| -4 | 24  | 0 | 16.4422 | 1.25899 | 9  |
| 5  | 24  | 0 | 0.94522 | 2.27903 | 10 |
| 0  | -25 | 0 | -1.3200 | 2.06842 | 13 |
| 1  | -25 | 0 | 6.74818 | 2.16008 | 13 |
| -1 | -25 | 0 | 4.94949 | 2.35418 | 13 |
| 1  | 25  | 0 | 2.58384 | 1.53356 | 11 |
| -2 | -25 | 0 | 5.83449 | 2.29546 | 13 |
| 2  | 25  | 0 | 6.60526 | 2.38121 | 10 |
| -3 | -25 | 0 | 3.30153 | 2.02011 | 13 |
| -3 | 25  | 0 | 1.63256 | 0.83165 | 9  |
| 3  | 25  | 0 | 3.08620 | 2.60066 | 10 |
| -3 | 25  | 0 | 2.47187 | 0.44317 | 6  |
| 4  | 25  | 0 | 16.8372 | 3.24470 | 10 |
| 0  | -26 | 0 | 6.23513 | 2.18124 | 13 |
| -1 | -26 | 0 | 10.0694 | 2.40668 | 13 |



|    |     |    |         |         |    |
|----|-----|----|---------|---------|----|
| 1  | -26 | 0  | 8.99563 | 2.25256 | 13 |
| 1  | 26  | 0  | 13.1587 | 1.57862 | 11 |
| 1  | 26  | 0  | 12.6846 | 1.51335 | 11 |
| -2 | -26 | 0  | 4.82160 | 1.99806 | 13 |
| 2  | 26  | 0  | 3.12763 | 1.25251 | 11 |
| -2 | 26  | 0  | 1.65052 | 0.95385 | 9  |
| -3 | -26 | 0  | 3.55548 | 2.08442 | 13 |
| -3 | 26  | 0  | 3.50359 | 0.95440 | 9  |
| 3  | 26  | 0  | 1.96831 | 1.76526 | 10 |
| 0  | -27 | 0  | -0.3206 | 2.01451 | 13 |
| -1 | -27 | 0  | 4.51021 | 2.17602 | 13 |
| 1  | -27 | 0  | 2.36085 | 1.89815 | 13 |
| -2 | -27 | 0  | -0.5533 | 1.93689 | 13 |
| 2  | 27  | 0  | -0.3967 | 0.73255 | 11 |
| 2  | 27  | 0  | -0.0844 | 0.74219 | 11 |
| 0  | -28 | 0  | 1.58931 | 1.45032 | 13 |
| -1 | -28 | 0  | 19.6635 | 2.79149 | 13 |
| 10 | 0   | -1 | 18.6846 | 3.61157 | 13 |
| -9 | 0   | 1  | 80.8939 | 5.73994 | 8  |
| 9  | 0   | -1 | 77.4446 | 7.62922 | 13 |
| 8  | 0   | -1 | 3.44109 | 3.66899 | 13 |
| -7 | 0   | 1  | 5.34650 | 1.44260 | 11 |
| -6 | 0   | 1  | 36.4507 | 3.74458 | 4  |
| -5 | 0   | 1  | 94.9577 | 7.48327 | 1  |
| -5 | 0   | 1  | 100.805 | 7.09098 | 4  |
| -4 | 0   | 1  | 204.678 | 12.8154 | 4  |
| -4 | 0   | 1  | 189.268 | 13.4940 | 1  |
| -4 | 0   | 1  | 200.823 | 12.7626 | 3  |
| -3 | 0   | 1  | 57.5930 | 4.06383 | 4  |
| -3 | 0   | 1  | 53.0364 | 3.84909 | 3  |
| -3 | 0   | 1  | 53.5489 | 3.67717 | 5  |
| -3 | 0   | 1  | 57.5281 | 4.05452 | 4  |
| -3 | 0   | 1  | 52.9503 | 3.71521 | 5  |
| -2 | 0   | 1  | 27.1327 | 2.82626 | 5  |
| -2 | 0   | 1  | 28.2286 | 2.55844 | 5  |
| -2 | 0   | 1  | 28.8457 | 2.41058 | 4  |
| -2 | 0   | 1  | 25.9099 | 3.17163 | 2  |
| -2 | 0   | 1  | 27.6118 | 2.21827 | 3  |
| -2 | 0   | 1  | 27.2549 | 2.35336 | 4  |
| -1 | 0   | 1  | -8.5016 | 0.43644 | 4  |
| -1 | 0   | 1  | -8.7742 | 0.73502 | 5  |
| -1 | 0   | -1 | -5.7904 | 0.65089 | 3  |
| -1 | 0   | -1 | -5.1567 | 0.87270 | 5  |
| -1 | 0   | -1 | -5.1331 | 0.75533 | 4  |
| -1 | 0   | -1 | -5.8418 | 0.87935 | 5  |
| -1 | 0   | -1 | -5.1967 | 0.84308 | 4  |
| -2 | 0   | -1 | 245.878 | 14.8947 | 4  |
| -2 | 0   | -1 | 252.669 | 14.8932 | 3  |
| -2 | 0   | -1 | 233.812 | 14.9587 | 4  |
| -2 | 0   | -1 | 240.250 | 15.7447 | 2  |

|    |    |    |         |         |    |
|----|----|----|---------|---------|----|
| -2 | 0  | -1 | 228.282 | 14.8584 | 3  |
| -3 | 0  | -1 | 18.7789 | 3.57604 | 2  |
| -3 | 0  | -1 | 20.8113 | 2.04872 | 3  |
| -3 | 0  | -1 | 20.8752 | 2.24120 | 4  |
| -3 | 0  | -1 | 21.8234 | 2.07893 | 4  |
| -4 | 0  | -1 | 594.036 | 36.4193 | 4  |
| -4 | 0  | -1 | 597.917 | 36.3963 | 3  |
| -4 | 0  | -1 | 550.251 | 36.6226 | 1  |
| -4 | 0  | -1 | 571.589 | 36.3010 | 4  |
| -4 | 0  | -1 | 635.361 | 38.2591 | 2  |
| -5 | 0  | -1 | 2.47654 | 1.31181 | 3  |
| -5 | 0  | -1 | 1.54626 | 1.27439 | 4  |
| -8 | 0  | -1 | 0.99025 | 1.22409 | 8  |
| -9 | 0  | -1 | 1.52359 | 1.08118 | 8  |
| 9  | 0  | 1  | 1.21523 | 2.90241 | 13 |
| 10 | -1 | -1 | 8.90421 | 3.10362 | 13 |
| 10 | 1  | -1 | 9.12912 | 3.31044 | 13 |
| 9  | -1 | -1 | 130.168 | 10.9446 | 13 |
| -9 | -1 | 1  | 141.005 | 9.14711 | 8  |
| 9  | 1  | -1 | 131.829 | 10.7937 | 13 |
| -9 | 1  | 1  | 136.797 | 8.90874 | 8  |
| -8 | 1  | 1  | 233.274 | 14.7753 | 7  |
| 8  | 1  | -1 | 185.838 | 15.1577 | 13 |
| -7 | -1 | 1  | 25.0952 | 3.59330 | 10 |
| -6 | -1 | 1  | 94.2591 | 6.97310 | 4  |
| -6 | 1  | 1  | 87.0517 | 6.61474 | 4  |
| -5 | -1 | 1  | 304.843 | 19.4093 | 1  |
| -5 | -1 | 1  | 305.085 | 18.6435 | 4  |
| -5 | 1  | 1  | 279.950 | 18.3517 | 4  |
| -5 | 1  | 1  | 266.248 | 18.3530 | 3  |
| -4 | -1 | 1  | 7.13887 | 1.63243 | 4  |
| -4 | -1 | 1  | 8.04672 | 1.50220 | 3  |
| -4 | -1 | 1  | 5.24365 | 2.27293 | 1  |
| -4 | 1  | 1  | 5.35932 | 1.37963 | 4  |
| -4 | 1  | 1  | 5.66069 | 1.32478 | 4  |
| -4 | 1  | 1  | 5.23383 | 1.21984 | 3  |
| -3 | -1 | 1  | 410.704 | 26.1103 | 5  |
| -3 | -1 | 1  | 382.951 | 25.5858 | 4  |
| -3 | -1 | 1  | 396.150 | 26.5666 | 2  |
| -3 | -1 | 1  | 394.321 | 25.5342 | 3  |
| -3 | -1 | 1  | 406.136 | 25.6528 | 4  |
| -3 | -1 | 1  | 392.588 | 25.8994 | 5  |
| -3 | 1  | 1  | 450.210 | 25.6033 | 4  |
| -3 | 1  | 1  | 458.364 | 25.5296 | 4  |
| -3 | 1  | 1  | 429.826 | 25.4520 | 3  |
| -2 | -1 | 1  | 272.282 | 16.6930 | 3  |
| -2 | -1 | 1  | 252.625 | 16.7667 | 4  |
| -2 | -1 | 1  | 275.281 | 17.4362 | 2  |
| -2 | -1 | 1  | 279.123 | 16.8021 | 4  |
| -2 | -1 | 1  | 255.781 | 17.1184 | 5  |

|    |    |    |         |         |   |
|----|----|----|---------|---------|---|
| -2 | -1 | 1  | 283.847 | 17.5136 | 5 |
| -1 | -1 | 1  | 180.955 | 13.5424 | 5 |
| -1 | 1  | 1  | 225.996 | 13.0593 | 3 |
| -1 | 1  | 1  | 219.120 | 13.0297 | 4 |
| -1 | 1  | 1  | 214.440 | 13.0876 | 4 |
| -1 | 1  | 1  | 216.303 | 13.2714 | 5 |
| 0  | -1 | -1 | 203.439 | 11.8869 | 5 |
| 0  | 1  | -1 | 177.333 | 11.6060 | 4 |
| 0  | 1  | 1  | 200.585 | 11.9880 | 5 |
| 0  | 1  | -1 | 177.318 | 11.7139 | 5 |
| -1 | -1 | -1 | 125.301 | 8.12839 | 5 |
| -1 | -1 | -1 | 125.044 | 7.83137 | 4 |
| -1 | -1 | -1 | 113.103 | 8.14116 | 5 |
| -1 | -1 | -1 | 125.912 | 7.75995 | 4 |
| -1 | -1 | -1 | 117.117 | 7.71313 | 3 |
| -1 | 1  | -1 | 118.413 | 7.55780 | 3 |
| -1 | 1  | -1 | 126.695 | 7.60647 | 4 |
| -1 | 1  | -1 | 126.964 | 7.57058 | 3 |
| -1 | 1  | -1 | 129.949 | 7.66978 | 4 |
| -2 | -1 | -1 | 24.3515 | 2.03180 | 4 |
| -2 | -1 | -1 | 24.2234 | 2.44187 | 5 |
| -2 | -1 | -1 | 25.9041 | 1.87607 | 3 |
| -2 | -1 | -1 | 25.4155 | 3.28802 | 2 |
| -2 | -1 | -1 | 24.5124 | 2.12208 | 4 |
| -2 | -1 | -1 | 26.5221 | 2.01513 | 3 |
| -2 | 1  | -1 | 17.8375 | 1.82162 | 4 |
| -2 | 1  | -1 | 17.9729 | 1.66524 | 4 |
| -2 | 1  | -1 | 17.5065 | 1.60628 | 3 |
| -2 | 1  | -1 | 18.2541 | 1.62365 | 3 |
| -2 | 1  | -1 | 18.5800 | 2.94196 | 2 |
| -2 | 1  | -1 | 16.7613 | 1.63983 | 4 |
| -3 | -1 | -1 | 710.710 | 43.4544 | 2 |
| -3 | -1 | -1 | 692.387 | 42.3707 | 4 |
| -3 | -1 | -1 | 672.051 | 42.2209 | 4 |
| -3 | -1 | -1 | 689.990 | 42.2715 | 3 |
| -3 | -1 | -1 | 683.386 | 42.2537 | 4 |
| -3 | 1  | -1 | 688.259 | 42.1722 | 4 |
| -3 | 1  | -1 | 694.551 | 42.1241 | 3 |
| -3 | 1  | -1 | 669.523 | 42.0857 | 4 |
| -3 | 1  | -1 | 705.241 | 43.3968 | 2 |
| -4 | -1 | -1 | 25.2566 | 2.84983 | 4 |
| -4 | -1 | -1 | 23.7153 | 3.62106 | 1 |
| -4 | -1 | -1 | 24.7996 | 2.51869 | 3 |
| -4 | -1 | -1 | 23.5331 | 3.98529 | 2 |
| -4 | 1  | -1 | 24.8756 | 2.60562 | 4 |
| -4 | 1  | -1 | 24.4311 | 2.30050 | 4 |
| -4 | 1  | -1 | 27.5192 | 2.47426 | 3 |
| -5 | -1 | -1 | 271.656 | 16.5881 | 4 |
| -5 | 1  | -1 | 249.735 | 16.0584 | 4 |
| -5 | 1  | -1 | 245.762 | 16.1514 | 4 |

|    |    |    |         |         |    |
|----|----|----|---------|---------|----|
| -5 | 1  | -1 | 245.466 | 16.2764 | 3  |
| -6 | 1  | -1 | 83.8760 | 6.03319 | 4  |
| -8 | -1 | -1 | 8.52999 | 1.74500 | 8  |
| -8 | 1  | -1 | 7.04114 | 1.63013 | 8  |
| -9 | -1 | -1 | 4.44576 | 1.38750 | 8  |
| 9  | 1  | 1  | 1.55554 | 3.11751 | 13 |
| 10 | -2 | -1 | 4.26736 | 2.45473 | 13 |
| 10 | 2  | -1 | 6.55643 | 2.70899 | 13 |
| -9 | -2 | 1  | 41.2287 | 3.86456 | 8  |
| -9 | 2  | 1  | 53.9320 | 3.58416 | 8  |
| 9  | 2  | -1 | 36.0009 | 6.40359 | 13 |
| 8  | 2  | -1 | 52.9527 | 7.06020 | 13 |
| -8 | 2  | 1  | 73.0677 | 5.43788 | 7  |
| -7 | -2 | 1  | 46.7041 | 4.95000 | 10 |
| 7  | 2  | -1 | 59.3413 | 6.83518 | 13 |
| 7  | 2  | -1 | 46.0681 | 6.80189 | 13 |
| -6 | -2 | 1  | 5.77099 | 2.52056 | 1  |
| -5 | -2 | 1  | 285.894 | 18.6605 | 4  |
| -5 | -2 | 1  | 288.911 | 19.6673 | 1  |
| -5 | 2  | 1  | 298.505 | 18.3709 | 3  |
| -5 | 2  | 1  | 292.959 | 18.2473 | 4  |
| -5 | 2  | 1  | 275.287 | 18.2639 | 4  |
| -4 | -2 | 1  | 589.200 | 37.0377 | 5  |
| -4 | -2 | 1  | 636.116 | 38.4991 | 2  |
| -4 | -2 | 1  | 628.500 | 37.2464 | 5  |
| -4 | -2 | 1  | 625.423 | 38.1141 | 1  |
| -4 | -2 | 1  | 611.478 | 36.9992 | 4  |
| -4 | 2  | 1  | 562.668 | 36.5750 | 4  |
| -4 | 2  | 1  | 559.254 | 36.6769 | 4  |
| -4 | 2  | 1  | 558.829 | 36.5846 | 3  |
| -3 | -2 | 1  | 60.2439 | 4.50864 | 4  |
| -3 | -2 | 1  | 52.8165 | 4.89112 | 5  |
| -3 | -2 | 1  | 61.9588 | 5.46869 | 5  |
| -3 | -2 | 1  | 58.9535 | 5.57765 | 2  |
| -3 | -2 | 1  | 60.4861 | 4.25691 | 3  |
| -3 | 2  | 1  | 55.2600 | 4.15308 | 4  |
| -3 | 2  | 1  | 58.3184 | 4.04263 | 4  |
| -3 | 2  | 1  | 58.3955 | 4.00806 | 3  |
| -2 | -2 | 1  | 956.125 | 59.5768 | 2  |
| -2 | -2 | 1  | 969.126 | 59.0145 | 4  |
| -2 | -2 | 1  | 990.402 | 59.9064 | 5  |
| -2 | -2 | 1  | 870.734 | 59.4192 | 5  |
| -2 | -2 | 1  | 914.131 | 58.9233 | 3  |
| -2 | 2  | 1  | 983.960 | 58.7695 | 3  |
| -2 | 2  | 1  | 1051.98 | 58.8182 | 4  |
| -2 | 2  | 1  | 1012.33 | 58.8789 | 4  |
| -1 | 2  | 1  | 38.9124 | 2.86042 | 3  |
| -1 | 2  | 1  | 41.4628 | 3.02062 | 4  |
| -1 | 2  | 1  | 43.7295 | 2.92739 | 4  |
| -1 | 2  | 1  | 41.9770 | 2.84560 | 5  |

|    |    |    |         |         |    |
|----|----|----|---------|---------|----|
| 0  | -2 | -1 | 77.1815 | 5.74171 | 5  |
| 0  | 2  | -1 | 85.4410 | 5.39737 | 4  |
| 0  | 2  | -1 | 79.0699 | 5.37279 | 4  |
| 0  | 2  | 1  | 83.5436 | 5.86500 | 5  |
| 0  | 2  | -1 | 82.4754 | 5.39495 | 5  |
| -1 | -2 | -1 | 23.6937 | 2.65291 | 5  |
| -1 | -2 | -1 | 22.2044 | 2.03234 | 4  |
| -1 | 2  | -1 | 19.5482 | 1.43333 | 4  |
| 1  | 2  | 1  | 24.3950 | 2.72174 | 5  |
| -1 | 2  | -1 | 20.5162 | 1.48840 | 4  |
| -2 | -2 | -1 | 507.645 | 30.4840 | 5  |
| -2 | -2 | -1 | 487.087 | 30.4480 | 5  |
| -2 | -2 | -1 | 511.833 | 30.6520 | 2  |
| -2 | -2 | -1 | 488.075 | 29.8230 | 3  |
| -2 | -2 | -1 | 510.660 | 29.9690 | 4  |
| -2 | -2 | -1 | 499.722 | 29.8394 | 4  |
| -2 | 2  | -1 | 464.543 | 29.5105 | 4  |
| -2 | 2  | -1 | 461.469 | 29.5570 | 4  |
| -2 | 2  | -1 | 462.687 | 29.5020 | 3  |
| -2 | 2  | -1 | 464.176 | 29.5093 | 3  |
| -3 | -2 | -1 | 97.2908 | 6.77018 | 4  |
| -3 | -2 | -1 | 89.6018 | 6.92108 | 5  |
| -3 | -2 | -1 | 99.3862 | 6.62378 | 3  |
| -3 | -2 | -1 | 96.7863 | 7.79021 | 2  |
| -3 | -2 | -1 | 102.089 | 7.06707 | 5  |
| -4 | -2 | -1 | 141.656 | 9.73000 | 1  |
| -4 | -2 | -1 | 132.339 | 8.72124 | 3  |
| -4 | -2 | -1 | 147.266 | 10.4044 | 2  |
| -4 | -2 | -1 | 141.862 | 8.92656 | 4  |
| -4 | 2  | -1 | 102.868 | 8.20884 | 3  |
| -4 | 2  | -1 | 105.778 | 8.16605 | 4  |
| -5 | 2  | -1 | 9.92613 | 1.57282 | 4  |
| -5 | 2  | -1 | 11.0490 | 1.73668 | 3  |
| -5 | 2  | -1 | 10.7141 | 1.52311 | 4  |
| -6 | 2  | -1 | 21.7371 | 2.79862 | 3  |
| 7  | 2  | 1  | 8.22807 | 3.21579 | 13 |
| -7 | 2  | -1 | 5.21408 | 1.41204 | 8  |
| -8 | -2 | -1 | 2.25965 | 1.56753 | 8  |
| 8  | 2  | 1  | -5.2011 | 3.37241 | 13 |
| -9 | -2 | -1 | 17.5984 | 2.33555 | 8  |
| 9  | 2  | 1  | 16.3965 | 4.32963 | 13 |
| 10 | 3  | -1 | 16.8504 | 3.14915 | 13 |
| -9 | -3 | 1  | 47.8492 | 4.13618 | 8  |
| 9  | 3  | -1 | 49.3180 | 6.82872 | 13 |
| -8 | -3 | 1  | 29.6409 | 3.90599 | 10 |
| 8  | 3  | -1 | 32.6372 | 5.29871 | 13 |
| -8 | 3  | 1  | 28.4847 | 3.50314 | 7  |
| -7 | -3 | 1  | 57.7140 | 5.26779 | 10 |
| 7  | 3  | -1 | 59.6301 | 7.30744 | 13 |
| -7 | 3  | 1  | 47.7088 | 4.69293 | 7  |

|    |    |    |         |         |   |
|----|----|----|---------|---------|---|
| -6 | -3 | 1  | 1.73882 | 2.28583 | 1 |
| -6 | 3  | 1  | 0.67724 | 1.14476 | 3 |
| -6 | 3  | 1  | 0.54367 | 0.79298 | 4 |
| -6 | 3  | 1  | 1.49670 | 0.89903 | 4 |
| -5 | 3  | 1  | 127.859 | 8.33585 | 4 |
| -5 | 3  | 1  | 124.621 | 8.35847 | 4 |
| -5 | 3  | 1  | 126.275 | 8.47792 | 3 |
| -4 | -3 | 1  | 736.201 | 46.9335 | 2 |
| -4 | -3 | 1  | 693.344 | 45.5397 | 4 |
| -4 | -3 | 1  | 700.605 | 46.6543 | 1 |
| -4 | -3 | 1  | 700.778 | 46.2477 | 5 |
| -4 | 3  | 1  | 747.649 | 45.1291 | 4 |
| -4 | 3  | 1  | 777.931 | 45.0615 | 4 |
| -4 | 3  | 1  | 797.841 | 45.1453 | 3 |
| -3 | -3 | 1  | 153.317 | 9.88068 | 3 |
| -3 | -3 | 1  | 160.733 | 10.9912 | 2 |
| -3 | -3 | 1  | 151.676 | 11.1046 | 5 |
| -3 | -3 | 1  | 153.127 | 10.0159 | 4 |
| -3 | 3  | 1  | 142.599 | 9.51841 | 3 |
| -3 | 3  | 1  | 149.383 | 9.53724 | 4 |
| -3 | 3  | 1  | 151.215 | 9.63944 | 4 |
| -2 | -3 | 1  | 3165.21 | 202.378 | 5 |
| -2 | -3 | 1  | 3186.36 | 201.983 | 2 |
| -2 | -3 | 1  | 3226.88 | 201.469 | 4 |
| -2 | 3  | 1  | 3490.82 | 201.818 | 3 |
| -2 | 3  | 1  | 3439.94 | 201.862 | 4 |
| -2 | 3  | 1  | 3448.83 | 201.253 | 4 |
| -1 | -3 | 1  | 458.536 | 28.2493 | 5 |
| -1 | 3  | 1  | 447.396 | 27.4893 | 4 |
| -1 | 3  | 1  | 443.837 | 27.4146 | 4 |
| -1 | 3  | 1  | 452.296 | 27.4266 | 3 |
| 1  | 3  | -1 | 467.815 | 27.6974 | 4 |
| -1 | 3  | 1  | 428.884 | 27.3820 | 3 |
| 0  | 3  | -1 | 947.222 | 57.8723 | 4 |
| 0  | 3  | 1  | 967.380 | 58.3086 | 5 |
| 0  | 3  | 1  | 993.334 | 57.9851 | 4 |
| 0  | 3  | -1 | 917.913 | 57.8712 | 5 |
| 0  | 3  | -1 | 970.302 | 57.8685 | 4 |
| 0  | 3  | -1 | 933.475 | 57.8692 | 4 |
| -1 | -3 | -1 | 524.289 | 33.9809 | 2 |
| -1 | -3 | -1 | 556.960 | 34.1072 | 5 |
| -1 | -3 | -1 | 546.910 | 33.6169 | 4 |
| 1  | 3  | 1  | 563.528 | 34.1865 | 5 |
| -2 | -3 | -1 | 64.9983 | 5.33999 | 5 |
| -2 | -3 | -1 | 58.2650 | 5.12073 | 2 |
| -2 | -3 | -1 | 55.0832 | 4.18291 | 4 |
| -2 | -3 | -1 | 59.9761 | 4.20550 | 3 |
| -2 | -3 | -1 | 54.0638 | 4.91679 | 5 |
| -2 | -3 | -1 | 59.6028 | 4.40184 | 4 |
| 2  | 3  | 1  | 57.4531 | 5.19838 | 5 |

|    |    |    |         |         |    |
|----|----|----|---------|---------|----|
| -3 | -3 | -1 | 444.388 | 28.4584 | 2  |
| -3 | -3 | -1 | 435.211 | 27.4433 | 4  |
| -3 | -3 | -1 | 437.742 | 28.1061 | 5  |
| -3 | -3 | -1 | 427.737 | 27.2428 | 3  |
| -3 | 3  | -1 | 423.030 | 26.8043 | 3  |
| -3 | 3  | -1 | 444.285 | 26.7249 | 4  |
| -3 | 3  | -1 | 454.498 | 26.7074 | 4  |
| -3 | 3  | -1 | 436.011 | 26.7965 | 3  |
| -4 | -3 | -1 | 0.17173 | 0.93742 | 5  |
| -4 | -3 | -1 | 0.01189 | 1.92798 | 1  |
| -4 | -3 | -1 | 0.04931 | 1.25047 | 4  |
| -4 | -3 | -1 | 0.52149 | 2.36536 | 2  |
| -4 | -3 | -1 | -0.1965 | 0.90047 | 5  |
| -5 | -3 | -1 | 3.51121 | 2.64687 | 2  |
| -5 | -3 | -1 | 5.08062 | 1.96606 | 4  |
| -5 | -3 | -1 | 4.32997 | 2.34767 | 1  |
| -6 | 3  | -1 | 113.413 | 7.93096 | 3  |
| -6 | 3  | -1 | 110.488 | 7.16037 | 9  |
| -7 | -3 | -1 | 88.3091 | 7.13783 | 10 |
| -7 | 3  | -1 | 89.4430 | 6.15059 | 8  |
| 7  | 3  | 1  | 90.0851 | 8.81292 | 13 |
| -8 | -3 | -1 | 9.76414 | 1.96967 | 8  |
| 8  | 3  | 1  | 5.51492 | 3.79517 | 13 |
| -9 | -3 | -1 | 1.19898 | 1.17942 | 8  |
| 9  | 3  | 1  | 3.90652 | 3.22474 | 13 |
| 10 | 4  | -1 | 26.2222 | 4.48489 | 13 |
| -9 | -4 | 1  | 59.4592 | 4.52842 | 8  |
| -9 | 4  | 1  | 41.5639 | 4.94260 | 7  |
| -8 | -4 | 1  | 46.3956 | 4.74097 | 10 |
| -8 | 4  | 1  | 30.8686 | 3.91769 | 7  |
| 8  | 4  | -1 | 44.0847 | 6.53931 | 13 |
| -7 | -4 | 1  | 63.8140 | 5.72813 | 10 |
| -7 | 4  | 1  | 46.5386 | 4.64962 | 7  |
| 7  | 4  | -1 | 49.8791 | 6.67124 | 13 |
| -6 | -4 | 1  | 32.3452 | 5.12085 | 1  |
| -6 | 4  | 1  | 29.4646 | 3.08749 | 3  |
| -5 | -4 | 1  | 18.0417 | 4.27104 | 2  |
| -5 | -4 | 1  | 15.6887 | 2.62181 | 5  |
| -5 | -4 | 1  | 19.3576 | 3.99937 | 1  |
| -5 | 4  | 1  | 23.8889 | 2.26555 | 3  |
| -5 | 4  | 1  | 20.4271 | 1.79739 | 4  |
| -5 | 4  | 1  | 22.0968 | 1.87875 | 4  |
| -4 | -4 | 1  | 24.0105 | 3.84729 | 2  |
| -4 | -4 | 1  | 22.3080 | 4.45297 | 1  |
| -4 | -4 | 1  | 23.2633 | 3.97418 | 5  |
| -4 | 4  | 1  | 18.4013 | 1.78653 | 4  |
| -4 | 4  | 1  | 16.9364 | 1.81812 | 4  |
| -4 | 4  | 1  | 16.1157 | 1.79278 | 3  |
| -3 | -4 | 1  | 626.893 | 39.6995 | 2  |
| -3 | -4 | 1  | 696.270 | 40.3394 | 5  |

|    |    |    |         |         |    |
|----|----|----|---------|---------|----|
| -3 | -4 | 1  | 652.966 | 38.9943 | 4  |
| -3 | 4  | 1  | 586.091 | 38.1776 | 4  |
| -3 | 4  | 1  | 619.913 | 38.2601 | 3  |
| -3 | 4  | 1  | 586.187 | 38.2488 | 4  |
| -2 | -4 | 1  | 106.006 | 7.64375 | 2  |
| -2 | -4 | 1  | 103.334 | 6.94743 | 4  |
| -2 | -4 | 1  | 109.743 | 8.11119 | 5  |
| -2 | 4  | 1  | 101.451 | 6.44056 | 3  |
| -2 | 4  | 1  | 97.8339 | 6.42529 | 4  |
| -2 | 4  | 1  | 98.4034 | 6.54165 | 4  |
| 1  | -4 | -1 | 3515.66 | 226.748 | 2  |
| -1 | -4 | 1  | 3768.54 | 228.737 | 5  |
| -1 | 4  | 1  | 3576.23 | 226.856 | 4  |
| -1 | 4  | 1  | 3597.99 | 226.290 | 3  |
| -1 | 4  | 1  | 3773.73 | 226.845 | 4  |
| -1 | 4  | 1  | 3945.18 | 226.968 | 3  |
| 1  | 4  | -1 | 3990.20 | 227.114 | 4  |
| 0  | 4  | -1 | 427.112 | 25.9135 | 3  |
| 0  | 4  | 1  | 402.133 | 25.9834 | 3  |
| 0  | 4  | -1 | 427.407 | 25.9375 | 4  |
| 0  | 4  | -1 | 451.896 | 25.9452 | 4  |
| 0  | 4  | 1  | 410.598 | 26.0337 | 4  |
| -1 | -4 | -1 | 591.287 | 37.4848 | 2  |
| -1 | -4 | -1 | 598.163 | 37.6246 | 5  |
| 1  | 4  | 1  | 619.685 | 37.6828 | 5  |
| -2 | -4 | -1 | 164.382 | 10.9318 | 3  |
| -2 | -4 | -1 | 172.616 | 11.8257 | 2  |
| -2 | -4 | -1 | 171.464 | 11.1543 | 4  |
| -2 | -4 | -1 | 170.671 | 11.9784 | 5  |
| -3 | -4 | -1 | 583.728 | 37.0835 | 4  |
| -3 | -4 | -1 | 602.945 | 38.0639 | 2  |
| -3 | -4 | -1 | 631.221 | 38.0616 | 5  |
| -3 | 4  | -1 | 565.566 | 36.3053 | 3  |
| -3 | 4  | -1 | 601.543 | 36.3033 | 3  |
| -4 | -4 | -1 | 20.3039 | 3.19698 | 5  |
| -4 | -4 | -1 | 19.3488 | 4.11665 | 1  |
| -4 | -4 | -1 | 18.6335 | 3.92278 | 2  |
| -5 | -4 | -1 | 150.808 | 12.8394 | 2  |
| -5 | -4 | -1 | 150.839 | 11.8763 | 1  |
| -5 | 4  | -1 | 153.970 | 10.0252 | 3  |
| -6 | -4 | -1 | 11.5454 | 3.10112 | 1  |
| -6 | 4  | -1 | 8.20663 | 2.03324 | 7  |
| -6 | 4  | -1 | 6.75686 | 1.51015 | 3  |
| -6 | 4  | -1 | 7.87262 | 1.04343 | 9  |
| -6 | 4  | -1 | 8.83728 | 0.92142 | 6  |
| -7 | -4 | -1 | 24.6534 | 3.81499 | 10 |
| -7 | 4  | -1 | 36.7815 | 2.55689 | 9  |
| -7 | 4  | -1 | 37.9865 | 2.92351 | 8  |
| 7  | 4  | 1  | 23.8231 | 4.61559 | 13 |
| -8 | -4 | -1 | 73.9253 | 6.08195 | 8  |



|    |    |    |         |         |    |
|----|----|----|---------|---------|----|
| 8  | 4  | 1  | 67.1754 | 8.26313 | 13 |
| -8 | 4  | -1 | 89.3197 | 5.32073 | 9  |
| -9 | 4  | -1 | 3.62332 | 0.56819 | 6  |
| -9 | 4  | -1 | 4.28685 | 0.80352 | 9  |
| -9 | 4  | -1 | 4.78426 | 0.90956 | 9  |
| 9  | 4  | 1  | -0.8911 | 2.96129 | 13 |
| 10 | 5  | -1 | 2.17350 | 2.53045 | 13 |
| -9 | -5 | 1  | 32.5726 | 3.48845 | 8  |
| -9 | 5  | 1  | 31.7882 | 2.43333 | 9  |
| -9 | 5  | 1  | 31.1609 | 3.41219 | 7  |
| 9  | 5  | -1 | 28.0641 | 4.95098 | 13 |
| -8 | -5 | 1  | 5.67916 | 2.21115 | 10 |
| 8  | 5  | -1 | 3.09035 | 3.62521 | 13 |
| -8 | 5  | 1  | 2.47268 | 1.78921 | 7  |
| -7 | -5 | 1  | 163.646 | 11.8926 | 10 |
| -7 | -5 | 1  | 157.448 | 12.8642 | 1  |
| -7 | 5  | 1  | 178.369 | 10.5553 | 9  |
| -7 | 5  | 1  | 173.622 | 11.3671 | 7  |
| 7  | 5  | -1 | 154.710 | 13.1527 | 13 |
| -6 | -5 | 1  | 78.3467 | 8.03842 | 1  |
| -6 | 5  | 1  | 72.1214 | 5.43027 | 3  |
| -6 | 5  | 1  | 73.9172 | 4.69227 | 6  |
| -6 | 5  | 1  | 69.9597 | 5.82931 | 7  |
| -5 | -5 | 1  | 21.3121 | 3.67885 | 5  |
| -5 | -5 | 1  | 22.9913 | 4.54353 | 2  |
| -5 | -5 | 1  | 21.4442 | 4.38827 | 1  |
| -4 | 5  | 1  | 46.1887 | 3.24959 | 4  |
| -4 | 5  | 1  | 49.2003 | 3.31659 | 4  |
| -4 | 5  | 1  | 52.9862 | 3.58756 | 3  |
| -3 | -5 | 1  | 1321.81 | 77.4670 | 5  |
| -3 | -5 | 1  | 1267.17 | 76.7059 | 2  |
| -3 | 5  | 1  | 1206.61 | 75.1574 | 3  |
| -3 | 5  | 1  | 1187.52 | 75.0431 | 4  |
| -3 | 5  | 1  | 1214.55 | 75.1143 | 4  |
| -2 | -5 | 1  | 202.963 | 15.8311 | 5  |
| -2 | 5  | 1  | 232.459 | 14.3368 | 3  |
| -2 | 5  | 1  | 236.825 | 14.3814 | 3  |
| -2 | 5  | 1  | 257.719 | 14.4321 | 4  |
| 1  | -5 | -1 | 802.348 | 49.4765 | 2  |
| -1 | -5 | 1  | 738.028 | 49.6846 | 5  |
| -1 | 5  | 1  | 857.005 | 48.7222 | 3  |
| -1 | 5  | 1  | 831.843 | 48.7313 | 4  |
| -1 | 5  | 1  | 810.995 | 48.7912 | 4  |
| -1 | 5  | 1  | 826.277 | 48.7703 | 3  |
| 1  | 5  | -1 | 776.171 | 49.4641 | 5  |
| 1  | 5  | -1 | 769.532 | 48.8998 | 4  |
| 0  | -5 | -1 | 49.7438 | 4.58399 | 2  |
| 0  | 5  | 1  | 54.2121 | 3.76376 | 3  |
| 0  | 5  | 1  | 56.1900 | 3.93760 | 4  |
| 0  | 5  | 1  | 57.8696 | 3.86080 | 4  |

|    |    |    |         |         |    |
|----|----|----|---------|---------|----|
| -1 | -5 | -1 | 193.449 | 12.9473 | 5  |
| -1 | -5 | -1 | 206.056 | 12.8879 | 2  |
| -1 | 5  | -1 | 178.800 | 11.6112 | 3  |
| -1 | 5  | -1 | 183.025 | 11.5961 | 4  |
| -1 | 5  | -1 | 190.829 | 11.5947 | 4  |
| -1 | 5  | -1 | 185.151 | 11.6141 | 3  |
| 1  | 5  | 1  | 205.335 | 12.2413 | 4  |
| -2 | -5 | -1 | 13.1553 | 2.86673 | 5  |
| -2 | -5 | -1 | 13.1451 | 2.52273 | 2  |
| -2 | -5 | -1 | 14.1820 | 2.01407 | 4  |
| -3 | -5 | -1 | 23.6204 | 4.03421 | 2  |
| -3 | -5 | -1 | 24.3141 | 3.79220 | 1  |
| -3 | -5 | -1 | 24.5485 | 3.72905 | 5  |
| -3 | 5  | -1 | 18.4725 | 1.45115 | 3  |
| -3 | 5  | -1 | 17.5881 | 1.43085 | 3  |
| -4 | -5 | -1 | 243.780 | 16.9367 | 5  |
| -4 | -5 | -1 | 235.513 | 17.1352 | 1  |
| -4 | -5 | -1 | 248.211 | 17.4844 | 2  |
| -5 | -5 | -1 | 840.477 | 54.0705 | 1  |
| -5 | -5 | -1 | 868.451 | 54.7870 | 2  |
| -5 | 5  | -1 | 834.184 | 51.8593 | 3  |
| -6 | -5 | -1 | 54.2442 | 6.33892 | 1  |
| -6 | -5 | -1 | 53.3909 | 7.58710 | 2  |
| -6 | 5  | -1 | 52.9456 | 3.61418 | 9  |
| -6 | 5  | -1 | 46.9568 | 4.42335 | 7  |
| -6 | 5  | -1 | 55.0238 | 3.47102 | 6  |
| -6 | 5  | -1 | 56.3734 | 4.69794 | 3  |
| -7 | -5 | -1 | 10.0335 | 2.37308 | 8  |
| -7 | -5 | -1 | 9.82210 | 2.48907 | 10 |
| -7 | 5  | -1 | 7.23787 | 0.83098 | 6  |
| -7 | 5  | -1 | 5.58174 | 1.92700 | 7  |
| -7 | 5  | -1 | 6.04637 | 1.05107 | 9  |
| 7  | 5  | 1  | 8.59285 | 3.72612 | 13 |
| -8 | -5 | -1 | 14.1541 | 2.43258 | 8  |
| -8 | -5 | -1 | 15.3479 | 2.81418 | 10 |
| 8  | 5  | 1  | 7.46867 | 4.96548 | 13 |
| -8 | 5  | -1 | 15.7892 | 1.74478 | 9  |
| -8 | 5  | -1 | 18.6162 | 1.37207 | 6  |
| -9 | -5 | -1 | 8.21381 | 1.68925 | 8  |
| -9 | 5  | -1 | 9.39893 | 0.87710 | 6  |
| 9  | 5  | 1  | 2.44828 | 3.28235 | 13 |
| -9 | 5  | -1 | 10.2713 | 1.23244 | 9  |
| 10 | 6  | -1 | 7.00338 | 2.63445 | 13 |
| -9 | -6 | 1  | 1.26101 | 1.59928 | 8  |
| -9 | 6  | 1  | 0.87295 | 0.66895 | 9  |
| -9 | 6  | 1  | 2.23598 | 0.50664 | 6  |
| 9  | 6  | -1 | 5.55515 | 3.65272 | 13 |
| -9 | 6  | 1  | 1.60022 | 1.53444 | 7  |
| -8 | 6  | 1  | 19.6422 | 1.62486 | 6  |
| -8 | 6  | 1  | 17.5872 | 1.71190 | 9  |

|    |    |    |         |         |    |
|----|----|----|---------|---------|----|
| -8 | 6  | 1  | 19.5373 | 3.22508 | 7  |
| -7 | -6 | 1  | 63.6984 | 6.98989 | 1  |
| -7 | -6 | 1  | 64.1825 | 5.74929 | 10 |
| 7  | 6  | -1 | 64.8200 | 8.07371 | 13 |
| -7 | 6  | 1  | 53.5849 | 3.64168 | 6  |
| -7 | 6  | 1  | 50.0739 | 3.85263 | 9  |
| -7 | 6  | 1  | 45.9894 | 4.77205 | 7  |
| -6 | 6  | 1  | 18.7440 | 1.49047 | 6  |
| -6 | 6  | 1  | 17.1080 | 2.66750 | 7  |
| -6 | 6  | 1  | 19.1020 | 2.23163 | 3  |
| -6 | 6  | 1  | 17.7543 | 1.56127 | 9  |
| -5 | -6 | 1  | 43.7518 | 5.93287 | 2  |
| -5 | -6 | 1  | 39.1078 | 5.26236 | 5  |
| -5 | -6 | 1  | 40.3406 | 5.82077 | 1  |
| -5 | 6  | 1  | 45.7770 | 3.43193 | 3  |
| -4 | -6 | 1  | 45.1005 | 6.13231 | 5  |
| -4 | -6 | 1  | 41.9232 | 5.58138 | 1  |
| -4 | -6 | 1  | 43.1582 | 5.58586 | 2  |
| -3 | -6 | 1  | 3.64702 | 2.27422 | 2  |
| -3 | -6 | 1  | 5.56775 | 2.59334 | 5  |
| -3 | 6  | 1  | 7.37151 | 1.03556 | 3  |
| -3 | 6  | 1  | 7.73928 | 0.72732 | 4  |
| -3 | 6  | 1  | 6.94243 | 0.78778 | 4  |
| -2 | -6 | 1  | 1196.49 | 67.5762 | 5  |
| -2 | -6 | 1  | 1125.30 | 66.7318 | 2  |
| -2 | 6  | 1  | 1066.46 | 65.5929 | 3  |
| -2 | 6  | 1  | 1040.37 | 65.4700 | 4  |
| -2 | 6  | 1  | 1013.66 | 65.5187 | 3  |
| -2 | 6  | 1  | 1043.76 | 65.5309 | 4  |
| -1 | -6 | 1  | 27.5857 | 3.72571 | 5  |
| -1 | -6 | 1  | 27.6677 | 3.46103 | 2  |
| 1  | -6 | -1 | 39.2876 | 3.81295 | 2  |
| 1  | 6  | -1 | 29.9623 | 3.55666 | 5  |
| -1 | 6  | 1  | 42.4032 | 2.77499 | 3  |
| -1 | 6  | 1  | 38.1546 | 2.72023 | 4  |
| -1 | 6  | 1  | 40.1424 | 2.86649 | 4  |
| -1 | 6  | 1  | 41.6585 | 2.65592 | 3  |
| 0  | -6 | -1 | 458.561 | 29.9305 | 2  |
| 0  | 6  | 1  | 473.929 | 29.2956 | 4  |
| 0  | 6  | -1 | 477.292 | 29.1562 | 3  |
| 0  | 6  | 1  | 467.629 | 29.3261 | 4  |
| 0  | 6  | -1 | 486.936 | 29.1669 | 4  |
| 0  | 6  | -1 | 511.896 | 29.1834 | 4  |
| 0  | 6  | 1  | 455.034 | 29.2391 | 3  |
| 1  | -6 | 1  | 229.706 | 16.0147 | 2  |
| -1 | -6 | -1 | 253.583 | 16.6308 | 2  |
| -1 | -6 | -1 | 256.726 | 16.7515 | 5  |
| -1 | 6  | -1 | 243.244 | 15.2774 | 4  |
| 1  | 6  | 1  | 274.329 | 15.8963 | 4  |
| -1 | 6  | -1 | 248.639 | 15.2698 | 4  |

|    |    |    |         |         |    |
|----|----|----|---------|---------|----|
| -2 | -6 | -1 | 978.901 | 60.9412 | 5  |
| -2 | -6 | -1 | 969.130 | 60.5095 | 2  |
| -3 | -6 | -1 | 28.0879 | 4.02672 | 2  |
| -3 | -6 | -1 | 28.3195 | 4.53565 | 5  |
| -3 | -6 | -1 | 29.2963 | 4.81723 | 1  |
| -3 | 6  | -1 | 24.6114 | 1.73892 | 3  |
| -4 | -6 | -1 | 144.463 | 11.2684 | 1  |
| -4 | -6 | -1 | 140.490 | 11.0656 | 2  |
| -4 | -6 | -1 | 139.774 | 10.9597 | 5  |
| -4 | 6  | -1 | 117.007 | 8.39339 | 3  |
| -5 | -6 | -1 | 8.86397 | 3.48307 | 1  |
| -5 | -6 | -1 | 9.93054 | 3.56232 | 2  |
| -5 | -6 | -1 | 7.35703 | 1.87429 | 5  |
| -6 | -6 | -1 | 14.1608 | 4.57360 | 2  |
| -6 | -6 | -1 | 18.7280 | 4.29179 | 1  |
| -6 | -6 | -1 | 15.5840 | 3.07356 | 10 |
| -6 | 6  | -1 | 14.9808 | 1.49245 | 9  |
| -6 | 6  | -1 | 16.6397 | 2.63297 | 7  |
| -6 | 6  | -1 | 16.5806 | 1.33989 | 6  |
| -7 | -6 | -1 | 22.7882 | 3.23640 | 8  |
| -7 | -6 | -1 | 23.0936 | 3.91361 | 10 |
| -7 | 6  | -1 | 18.1990 | 1.86219 | 9  |
| -7 | 6  | -1 | 18.1366 | 3.10276 | 7  |
| -7 | 6  | -1 | 21.3820 | 1.58823 | 6  |
| 7  | 6  | 1  | 24.4006 | 4.60001 | 13 |
| -8 | -6 | -1 | 12.9297 | 2.30511 | 8  |
| -8 | -6 | -1 | 10.8017 | 2.40621 | 10 |
| 8  | 6  | 1  | 10.9409 | 3.98070 | 13 |
| -8 | 6  | -1 | 8.96256 | 0.95746 | 6  |
| -8 | 6  | -1 | 9.73848 | 1.20642 | 9  |
| -9 | -6 | -1 | 8.17978 | 1.73445 | 8  |
| 9  | 6  | 1  | 6.72035 | 3.48032 | 13 |
| -9 | 6  | -1 | 12.7779 | 0.96303 | 6  |
| -9 | 6  | -1 | 12.0288 | 1.40145 | 9  |
| -9 | -7 | 1  | 20.9033 | 2.97284 | 8  |
| -9 | -7 | 1  | 21.6040 | 2.76412 | 10 |
| -9 | 7  | 1  | 18.9187 | 2.83293 | 7  |
| -9 | 7  | 1  | 20.9087 | 1.81417 | 9  |
| 9  | 7  | -1 | 20.7224 | 4.25662 | 13 |
| -9 | 7  | 1  | 20.8770 | 1.54409 | 6  |
| -8 | -7 | 1  | 5.48941 | 2.56130 | 10 |
| 8  | 7  | -1 | -1.6352 | 3.92641 | 13 |
| -8 | 7  | 1  | 2.29879 | 0.68254 | 6  |
| -8 | 7  | 1  | 3.99304 | 1.99889 | 7  |
| -8 | 7  | 1  | 3.46289 | 0.75728 | 9  |
| -7 | -7 | 1  | 271.410 | 18.1785 | 10 |
| -7 | -7 | 1  | 275.883 | 19.8328 | 1  |
| -7 | 7  | 1  | 262.790 | 16.5620 | 9  |
| -7 | 7  | 1  | 255.008 | 17.4338 | 7  |
| 7  | 7  | -1 | 270.880 | 18.8098 | 13 |

|    |    |    |         |         |   |
|----|----|----|---------|---------|---|
| -7 | 7  | 1  | 272.327 | 16.4035 | 6 |
| -6 | -7 | 1  | 49.4097 | 7.57926 | 2 |
| -6 | -7 | 1  | 44.6719 | 6.92310 | 1 |
| -6 | 7  | 1  | 33.4096 | 3.52284 | 7 |
| -6 | 7  | 1  | 31.9635 | 2.54114 | 9 |
| -6 | 7  | 1  | 32.8454 | 3.03346 | 3 |
| -6 | 7  | 1  | 35.2192 | 2.37430 | 6 |
| -5 | -7 | 1  | 212.826 | 16.1790 | 5 |
| -5 | -7 | 1  | 232.001 | 16.6259 | 1 |
| -5 | -7 | 1  | 227.325 | 16.4790 | 2 |
| -5 | 7  | 1  | 185.861 | 13.3998 | 3 |
| -4 | -7 | 1  | 440.087 | 31.7167 | 5 |
| -4 | -7 | 1  | 431.036 | 30.9749 | 2 |
| -4 | -7 | 1  | 425.710 | 31.2688 | 1 |
| -4 | 7  | 1  | 538.362 | 28.9860 | 3 |
| -4 | 7  | 1  | 509.577 | 29.0602 | 3 |
| -3 | -7 | 1  | 79.7932 | 6.76947 | 2 |
| -3 | -7 | 1  | 76.4387 | 7.37295 | 1 |
| -3 | -7 | 1  | 85.8019 | 7.76495 | 5 |
| -3 | 7  | 1  | 69.7938 | 4.88086 | 3 |
| -3 | 7  | 1  | 68.8021 | 4.96508 | 3 |
| -2 | -7 | 1  | 520.935 | 34.7198 | 2 |
| 2  | -7 | -1 | 531.409 | 34.8259 | 2 |
| -2 | 7  | 1  | 540.708 | 33.4681 | 4 |
| -2 | 7  | 1  | 566.564 | 33.5830 | 3 |
| -2 | 7  | 1  | 556.556 | 33.5199 | 4 |
| -2 | 7  | 1  | 582.284 | 33.6615 | 3 |
| -1 | -7 | 1  | 45.5921 | 4.42591 | 2 |
| 1  | -7 | -1 | 51.7043 | 4.67727 | 2 |
| -1 | 7  | 1  | 50.1864 | 3.57003 | 4 |
| -1 | 7  | 1  | 55.1110 | 3.53110 | 4 |
| 1  | 7  | -1 | 42.4624 | 4.26250 | 5 |
| 1  | 7  | -1 | 46.2721 | 3.70840 | 4 |
| -1 | 7  | 1  | 52.3421 | 3.57104 | 3 |
| -1 | 7  | 1  | 53.1236 | 3.46220 | 3 |
| 1  | 7  | -1 | 44.6177 | 3.79316 | 4 |
| 0  | -7 | -1 | 1408.05 | 86.1370 | 2 |
| 0  | -7 | 1  | 1307.55 | 85.7262 | 2 |
| 0  | 7  | 1  | 1382.84 | 85.3373 | 3 |
| 0  | 7  | 1  | 1473.26 | 85.4022 | 4 |
| 0  | 7  | -1 | 1417.76 | 85.2545 | 3 |
| 0  | 7  | -1 | 1396.54 | 85.2382 | 4 |
| 0  | 7  | -1 | 1404.11 | 85.2432 | 4 |
| 0  | 7  | 1  | 1443.18 | 85.4268 | 4 |
| -1 | -7 | -1 | 56.8356 | 5.50272 | 2 |
| 1  | -7 | 1  | 64.1177 | 5.06735 | 2 |
| -1 | -7 | -1 | 53.5374 | 5.78565 | 5 |
| -1 | 7  | -1 | 68.7549 | 4.18424 | 3 |
| -1 | 7  | -1 | 68.1511 | 4.07738 | 4 |
| 1  | 7  | 1  | 56.2417 | 4.65206 | 4 |

|    |    |    |         |         |    |
|----|----|----|---------|---------|----|
| -1 | 7  | -1 | 71.9991 | 4.12296 | 4  |
| -2 | -7 | -1 | 308.248 | 20.7373 | 2  |
| -2 | -7 | -1 | 317.684 | 21.3414 | 5  |
| -3 | -7 | -1 | 144.047 | 11.5998 | 5  |
| -3 | -7 | -1 | 141.167 | 11.3805 | 1  |
| -3 | -7 | -1 | 145.652 | 11.1888 | 2  |
| -4 | -7 | -1 | 250.014 | 18.2544 | 1  |
| -4 | -7 | -1 | 251.866 | 18.2598 | 2  |
| -4 | -7 | -1 | 246.263 | 18.1956 | 5  |
| -4 | 7  | -1 | 257.215 | 15.5083 | 3  |
| -5 | -7 | -1 | 25.0478 | 5.38731 | 2  |
| -5 | -7 | -1 | 27.6132 | 5.70169 | 1  |
| -5 | 7  | -1 | 35.3239 | 2.17630 | 6  |
| -5 | 7  | -1 | 33.0833 | 2.17352 | 6  |
| -5 | 7  | -1 | 34.8061 | 2.67401 | 3  |
| -6 | -7 | -1 | 13.7026 | 4.41834 | 2  |
| -6 | -7 | -1 | 12.2985 | 4.11237 | 1  |
| -6 | 7  | -1 | 14.0900 | 1.32711 | 9  |
| -6 | 7  | -1 | 12.5959 | 1.15162 | 6  |
| -7 | -7 | -1 | 302.092 | 19.5399 | 8  |
| -7 | -7 | -1 | 315.618 | 20.2016 | 10 |
| 7  | 7  | 1  | 303.006 | 20.9483 | 13 |
| -7 | 7  | -1 | 307.107 | 18.4413 | 6  |
| -7 | 7  | -1 | 297.656 | 18.5649 | 9  |
| -7 | 7  | -1 | 287.042 | 19.4338 | 7  |
| -8 | 7  | -1 | 10.7142 | 0.94010 | 6  |
| -8 | 7  | -1 | 9.29226 | 2.50123 | 7  |
| -8 | 7  | -1 | 9.83734 | 1.29450 | 9  |
| -9 | -7 | -1 | 0.10329 | 0.91796 | 8  |
| -9 | 7  | -1 | 0.26941 | 0.67983 | 9  |
| 9  | 7  | 1  | 1.14820 | 2.91405 | 13 |
| -9 | 7  | -1 | 0.97823 | 0.33213 | 6  |
| -9 | 7  | -1 | 0.78141 | 0.38529 | 6  |
| -9 | -8 | 1  | 4.69162 | 2.19956 | 10 |
| -9 | -8 | 1  | 5.15007 | 1.85249 | 8  |
| -9 | 8  | 1  | 7.88503 | 1.50681 | 7  |
| -9 | 8  | 1  | 9.27086 | 0.78324 | 6  |
| -9 | 8  | 1  | 8.36539 | 1.08457 | 9  |
| 9  | 8  | -1 | 4.32163 | 3.32269 | 13 |
| -8 | -8 | 1  | 4.02986 | 2.64774 | 10 |
| -8 | -8 | 1  | 3.87796 | 1.99460 | 8  |
| -8 | 8  | 1  | 5.25930 | 0.65091 | 6  |
| 8  | 8  | -1 | 14.8810 | 4.40523 | 13 |
| -8 | 8  | 1  | 4.99503 | 0.81253 | 9  |
| -8 | 8  | 1  | 5.40045 | 2.10481 | 7  |
| -7 | -8 | 1  | 87.6333 | 9.47781 | 1  |
| -7 | -8 | 1  | 84.0213 | 7.64219 | 10 |
| -7 | 8  | 1  | 89.5195 | 6.84688 | 7  |
| 7  | 8  | -1 | 91.1451 | 8.92284 | 13 |
| -7 | 8  | 1  | 83.7696 | 5.67937 | 9  |

|    |    |    |         |         |    |
|----|----|----|---------|---------|----|
| -7 | 8  | 1  | 88.4097 | 5.50124 | 6  |
| -6 | -8 | 1  | 8.56061 | 2.75339 | 10 |
| -6 | -8 | 1  | 10.5472 | 4.51781 | 1  |
| -6 | -8 | 1  | 10.0788 | 4.00360 | 2  |
| -6 | 8  | 1  | 6.89537 | 1.83335 | 7  |
| -6 | 8  | 1  | 4.95156 | 0.69154 | 6  |
| -6 | 8  | 1  | 7.35925 | 0.93754 | 9  |
| -5 | -8 | 1  | 32.0483 | 5.96837 | 2  |
| -5 | -8 | 1  | 30.8568 | 5.32407 | 5  |
| -5 | -8 | 1  | 32.4372 | 6.37452 | 1  |
| -4 | -8 | 1  | 61.9360 | 7.13434 | 1  |
| -4 | -8 | 1  | 62.8097 | 7.38397 | 5  |
| -4 | -8 | 1  | 64.3621 | 6.98398 | 2  |
| -4 | 8  | 1  | 62.2132 | 4.45545 | 3  |
| -4 | 8  | 1  | 64.8721 | 4.39003 | 3  |
| -3 | -8 | 1  | 131.710 | 10.7645 | 2  |
| -3 | -8 | 1  | 131.152 | 11.4356 | 1  |
| -3 | 8  | 1  | 150.133 | 9.18067 | 3  |
| -3 | 8  | 1  | 153.845 | 9.09018 | 3  |
| -2 | -8 | 1  | 253.708 | 18.6289 | 2  |
| 2  | -8 | -1 | 291.795 | 19.0088 | 2  |
| -2 | 8  | 1  | 279.553 | 17.3549 | 4  |
| -2 | 8  | 1  | 296.974 | 17.4891 | 3  |
| -2 | 8  | 1  | 278.008 | 17.5339 | 3  |
| -2 | 8  | 1  | 291.959 | 17.3279 | 4  |
| -1 | -8 | 1  | 175.746 | 11.8935 | 2  |
| 1  | -8 | -1 | 169.778 | 12.1945 | 2  |
| -1 | 8  | 1  | 173.155 | 10.9322 | 4  |
| -1 | 8  | 1  | 173.794 | 10.9218 | 3  |
| 1  | 8  | -1 | 178.992 | 11.2044 | 4  |
| 1  | 8  | -1 | 163.957 | 11.6295 | 5  |
| -1 | 8  | 1  | 174.932 | 11.0172 | 3  |
| -1 | 8  | 1  | 170.578 | 10.9591 | 4  |
| 0  | -8 | 1  | 660.977 | 42.2505 | 2  |
| 0  | -8 | -1 | 663.123 | 42.6124 | 2  |
| 0  | 8  | 1  | 687.830 | 41.7877 | 4  |
| 0  | 8  | 1  | 664.338 | 41.7178 | 3  |
| 0  | 8  | -1 | 705.959 | 41.6239 | 4  |
| 0  | 8  | -1 | 680.087 | 41.6223 | 4  |
| 0  | 8  | 1  | 691.785 | 41.7704 | 4  |
| 0  | 8  | -1 | 689.397 | 41.6339 | 3  |
| 1  | -8 | 1  | 1432.00 | 90.0175 | 2  |
| -1 | -8 | -1 | 1435.66 | 90.4567 | 2  |
| -1 | 8  | -1 | 1547.45 | 89.0768 | 4  |
| 1  | 8  | 1  | 1406.35 | 89.6019 | 4  |
| -1 | 8  | -1 | 1492.26 | 89.1536 | 3  |
| -1 | 8  | -1 | 1504.31 | 89.0409 | 4  |
| 2  | -8 | 1  | 35.0655 | 3.93603 | 2  |
| -2 | 8  | -1 | 38.1428 | 2.47028 | 3  |
| -3 | -8 | -1 | 136.029 | 11.0745 | 5  |

|    |    |    |         |         |    |
|----|----|----|---------|---------|----|
| -3 | -8 | -1 | 126.910 | 10.8565 | 1  |
| -3 | -8 | -1 | 131.656 | 10.6139 | 2  |
| -4 | -8 | -1 | 265.253 | 18.9930 | 2  |
| -4 | -8 | -1 | 250.862 | 19.0212 | 5  |
| -4 | -8 | -1 | 264.051 | 19.0844 | 1  |
| -4 | 8  | -1 | 260.041 | 15.9343 | 3  |
| -5 | -8 | -1 | 8.67247 | 3.58252 | 2  |
| -5 | -8 | -1 | 7.98204 | 3.43921 | 1  |
| -5 | 8  | -1 | 10.9105 | 0.83824 | 6  |
| -5 | 8  | -1 | 9.97174 | 1.23271 | 3  |
| -5 | 8  | -1 | 13.4904 | 2.06245 | 7  |
| -5 | 8  | -1 | 9.74378 | 0.79467 | 6  |
| -6 | -8 | -1 | 32.8622 | 6.48777 | 1  |
| -6 | -8 | -1 | 34.6671 | 4.60386 | 10 |
| -6 | -8 | -1 | 32.3652 | 6.41898 | 2  |
| 6  | 8  | 1  | 40.2470 | 6.38635 | 13 |
| -6 | 8  | -1 | 29.4036 | 3.58241 | 7  |
| -6 | 8  | -1 | 33.0889 | 2.14908 | 6  |
| -6 | 8  | -1 | 30.2341 | 2.10783 | 6  |
| -6 | 8  | -1 | 30.1885 | 2.28814 | 9  |
| -7 | -8 | -1 | 44.5122 | 4.70434 | 8  |
| -7 | -8 | -1 | 49.4257 | 5.46524 | 10 |
| -7 | -8 | -1 | 44.2370 | 6.19066 | 1  |
| -7 | 8  | -1 | 49.8292 | 3.32597 | 9  |
| -7 | 8  | -1 | 46.4282 | 4.58067 | 7  |
| 7  | 8  | 1  | 44.5112 | 7.22934 | 13 |
| -7 | 8  | -1 | 54.4182 | 3.17338 | 6  |
| -8 | -8 | -1 | 166.812 | 10.8077 | 8  |
| -8 | -8 | -1 | 155.189 | 11.0403 | 10 |
| -8 | 8  | -1 | 150.659 | 10.6051 | 7  |
| -8 | 8  | -1 | 147.481 | 9.58678 | 6  |
| 8  | 8  | 1  | 183.310 | 12.7898 | 13 |
| -8 | 8  | -1 | 145.955 | 9.58079 | 6  |
| -8 | 8  | -1 | 157.004 | 9.73598 | 9  |
| -9 | -8 | -1 | 1.51177 | 1.41959 | 8  |
| 9  | 8  | 1  | 2.76912 | 2.88015 | 13 |
| -9 | 8  | -1 | 2.14519 | 0.52502 | 9  |
| -9 | -9 | 1  | -0.2618 | 1.50018 | 8  |
| -9 | -9 | 1  | 1.69389 | 1.73574 | 10 |
| -9 | 9  | 1  | 1.06457 | 0.32121 | 6  |
| 9  | 9  | -1 | 1.80574 | 3.13434 | 13 |
| -9 | 9  | 1  | 0.67852 | 1.38299 | 7  |
| -9 | 9  | 1  | 0.17815 | 0.55317 | 9  |
| -9 | 9  | 1  | 0.96699 | 0.32447 | 6  |
| -8 | -9 | 1  | 29.2788 | 3.93241 | 8  |
| -8 | -9 | 1  | 29.9923 | 4.59026 | 10 |
| -8 | 9  | 1  | 41.8517 | 3.66909 | 7  |
| -8 | 9  | 1  | 41.5440 | 2.58662 | 9  |
| 8  | 9  | -1 | 25.9667 | 5.07710 | 13 |
| -8 | 9  | 1  | 37.4334 | 2.40107 | 6  |



|    |    |    |         |         |    |
|----|----|----|---------|---------|----|
| -7 | -9 | 1  | 55.1623 | 5.78580 | 10 |
| -7 | -9 | 1  | 53.9202 | 7.46320 | 1  |
| 7  | 9  | -1 | 57.6730 | 8.08800 | 13 |
| -7 | 9  | 1  | 52.7070 | 4.87462 | 7  |
| -7 | 9  | 1  | 49.6636 | 3.35734 | 6  |
| -7 | 9  | 1  | 49.1866 | 3.54720 | 9  |
| -6 | -9 | 1  | 54.0144 | 7.36747 | 2  |
| -6 | -9 | 1  | 51.7190 | 5.38415 | 10 |
| -6 | 9  | 1  | 39.6333 | 4.06825 | 7  |
| -6 | 9  | 1  | 39.1142 | 2.68674 | 6  |
| -6 | 9  | 1  | 36.6427 | 2.84596 | 9  |
| -5 | -9 | 1  | 491.581 | 34.8077 | 2  |
| -5 | -9 | 1  | 515.902 | 35.4766 | 1  |
| -5 | 9  | 1  | 506.086 | 32.5104 | 3  |
| -5 | 9  | 1  | 513.438 | 31.3302 | 6  |
| -5 | 9  | 1  | 590.454 | 32.8121 | 7  |
| -5 | 9  | 1  | 483.962 | 31.7492 | 3  |
| -4 | -9 | 1  | 194.442 | 14.3447 | 1  |
| -4 | -9 | 1  | 198.313 | 13.7650 | 2  |
| -4 | 9  | 1  | 161.745 | 10.9177 | 3  |
| -4 | 9  | 1  | 151.890 | 10.9994 | 3  |
| -3 | -9 | 1  | 9.78965 | 2.96285 | 2  |
| -3 | -9 | 1  | 6.88465 | 3.60893 | 1  |
| 3  | -9 | -1 | 11.1165 | 3.21835 | 2  |
| -3 | 9  | 1  | 10.6180 | 1.24343 | 3  |
| -3 | 9  | 1  | 11.3063 | 1.41322 | 3  |
| 2  | -9 | -1 | 333.488 | 22.2052 | 2  |
| -2 | 9  | 1  | 346.661 | 20.6683 | 3  |
| -2 | 9  | 1  | 343.121 | 20.4618 | 4  |
| -2 | 9  | 1  | 318.789 | 20.6826 | 3  |
| -2 | 9  | 1  | 325.434 | 20.4738 | 4  |
| 1  | -9 | -1 | 2.92544 | 2.25954 | 2  |
| -1 | 9  | 1  | 2.56682 | 1.05746 | 3  |
| -1 | 9  | 1  | 2.96999 | 0.99048 | 3  |
| 0  | -9 | -1 | 765.361 | 47.1744 | 2  |
| 0  | -9 | 1  | 724.363 | 46.7219 | 2  |
| 0  | 9  | -1 | 722.058 | 45.9542 | 4  |
| 0  | 9  | -1 | 741.247 | 45.9857 | 4  |
| 0  | 9  | -1 | 731.187 | 46.0997 | 3  |
| 0  | 9  | 1  | 818.304 | 46.2054 | 4  |
| 0  | 9  | 1  | 760.499 | 46.1304 | 3  |
| 1  | -9 | 1  | 47.0850 | 4.70721 | 2  |
| -1 | -9 | -1 | 56.0758 | 5.38109 | 2  |
| -1 | 9  | -1 | 52.1451 | 3.49539 | 4  |
| -1 | 9  | -1 | 48.9406 | 3.61561 | 3  |
| -1 | 9  | -1 | 55.8007 | 3.56372 | 4  |
| -2 | -9 | -1 | 431.629 | 26.7368 | 2  |
| 2  | -9 | 1  | 376.917 | 25.9112 | 2  |
| -3 | -9 | -1 | 378.901 | 25.6930 | 1  |
| -3 | -9 | -1 | 384.386 | 25.3437 | 2  |

|    |     |    |         |         |    |
|----|-----|----|---------|---------|----|
| 3  | -9  | 1  | 358.256 | 24.5507 | 2  |
| -3 | 9   | -1 | 367.766 | 22.6137 | 3  |
| -3 | 9   | -1 | 372.951 | 22.6343 | 3  |
| -4 | -9  | -1 | 148.484 | 13.2018 | 1  |
| -4 | -9  | -1 | 153.695 | 13.3653 | 2  |
| -4 | -9  | -1 | 143.932 | 13.2308 | 5  |
| -4 | 9   | -1 | 180.471 | 10.0970 | 3  |
| -4 | 9   | -1 | 174.854 | 10.0474 | 3  |
| -5 | -9  | -1 | 51.5860 | 7.30607 | 2  |
| -5 | -9  | -1 | 51.0347 | 7.73927 | 1  |
| -5 | 9   | -1 | 54.3337 | 3.44914 | 6  |
| -5 | 9   | -1 | 54.2422 | 3.53685 | 9  |
| -5 | 9   | -1 | 54.0257 | 4.68161 | 7  |
| -5 | 9   | -1 | 58.0293 | 3.78024 | 3  |
| -5 | 9   | -1 | 58.7039 | 3.46910 | 6  |
| -5 | 9   | -1 | 56.4209 | 3.72269 | 3  |
| -6 | -9  | -1 | 4.88489 | 2.02969 | 8  |
| -6 | -9  | -1 | 4.62895 | 3.49175 | 1  |
| -6 | -9  | -1 | 2.23273 | 2.70353 | 10 |
| -6 | 9   | -1 | 8.94783 | 0.78430 | 6  |
| -6 | 9   | -1 | 6.35707 | 0.76383 | 9  |
| -6 | 9   | -1 | 9.10507 | 2.16839 | 7  |
| -6 | 9   | -1 | 3.64133 | 2.62930 | 12 |
| -6 | 9   | -1 | 6.77645 | 0.70265 | 6  |
| 6  | 9   | 1  | 8.85381 | 4.25103 | 13 |
| -7 | -9  | -1 | 70.1954 | 8.07449 | 1  |
| -7 | -9  | -1 | 66.2805 | 6.70878 | 10 |
| -7 | -9  | -1 | 65.7929 | 5.98863 | 8  |
| -7 | 9   | -1 | 71.9934 | 4.42904 | 6  |
| -7 | 9   | -1 | 71.0987 | 4.43641 | 6  |
| 7  | 9   | 1  | 67.5879 | 8.30742 | 13 |
| -7 | 9   | -1 | 73.5275 | 4.59089 | 9  |
| -7 | 9   | -1 | 74.5139 | 5.87295 | 7  |
| -8 | -9  | -1 | 34.8338 | 3.78094 | 8  |
| -8 | -9  | -1 | 37.4600 | 4.10768 | 10 |
| 8  | 9   | 1  | 36.8706 | 6.47321 | 13 |
| -8 | 9   | -1 | 24.6002 | 3.28918 | 7  |
| -8 | 9   | -1 | 28.3355 | 2.09411 | 9  |
| -8 | 9   | -1 | 27.8062 | 1.91387 | 6  |
| -8 | 9   | -1 | 27.9246 | 1.90951 | 6  |
| -9 | -9  | -1 | 1.71892 | 1.69606 | 8  |
| 9  | 9   | 1  | 0.03257 | 2.69407 | 13 |
| -9 | -10 | 1  | 0.66938 | 2.09817 | 10 |
| -9 | -10 | 1  | 2.69648 | 1.59942 | 8  |
| 9  | 10  | -1 | -0.4600 | 2.81193 | 13 |
| -9 | 10  | 1  | 2.09104 | 0.43766 | 9  |
| -9 | 10  | 1  | 1.99720 | 0.53334 | 9  |
| -9 | 10  | 1  | 2.39089 | 1.43726 | 7  |
| -8 | 10  | 1  | 15.1309 | 1.15691 | 6  |
| -8 | 10  | 1  | 13.3722 | 1.29398 | 9  |

|    |     |    |         |         |    |
|----|-----|----|---------|---------|----|
| -8 | 10  | 1  | 12.8853 | 1.13193 | 6  |
| -7 | -10 | 1  | 72.0333 | 9.05491 | 1  |
| -7 | 10  | 1  | 48.5248 | 4.90689 | 7  |
| 7  | 10  | -1 | 65.0119 | 8.48664 | 13 |
| -7 | 10  | 1  | 49.0712 | 3.52057 | 9  |
| -7 | 10  | 1  | 49.3859 | 3.34046 | 6  |
| -6 | -10 | 1  | -1.2148 | 2.90792 | 2  |
| -6 | -10 | 1  | 2.33774 | 2.59549 | 10 |
| -6 | -10 | 1  | 5.11384 | 3.70706 | 1  |
| 6  | -10 | -1 | 9.66907 | 4.24616 | 2  |
| -6 | 10  | 1  | 9.03110 | 0.88047 | 6  |
| 6  | 10  | -1 | 0.63203 | 4.21400 | 13 |
| -6 | 10  | 1  | 8.42122 | 1.03028 | 9  |
| -6 | 10  | 1  | 9.70757 | 2.10663 | 7  |
| -5 | -10 | 1  | 86.5722 | 9.27364 | 2  |
| -5 | -10 | 1  | 80.5659 | 9.40628 | 1  |
| 5  | -10 | -1 | 87.0098 | 8.80048 | 2  |
| -5 | 10  | 1  | 87.0082 | 5.23891 | 6  |
| -5 | 10  | 1  | 85.5570 | 5.29261 | 6  |
| -5 | 10  | 1  | 82.2827 | 6.33259 | 7  |
| -5 | 10  | 1  | 82.6866 | 5.39578 | 9  |
| -5 | 10  | 1  | 82.4474 | 5.67577 | 3  |
| -5 | 10  | 1  | 84.4170 | 5.85424 | 3  |
| -4 | -10 | 1  | 34.7036 | 5.05837 | 2  |
| 4  | -10 | -1 | 34.2552 | 5.12105 | 2  |
| -4 | -10 | 1  | 36.1620 | 5.86176 | 1  |
| -4 | 10  | 1  | 32.4780 | 2.59386 | 3  |
| -4 | 10  | 1  | 32.1003 | 2.69659 | 3  |
| 3  | -10 | -1 | 16.4455 | 3.71943 | 2  |
| -3 | -10 | 1  | 11.2271 | 3.29584 | 2  |
| -3 | -10 | 1  | 12.6497 | 4.17819 | 1  |
| -3 | 10  | 1  | 17.8405 | 1.71142 | 3  |
| -3 | 10  | 1  | 17.7110 | 1.72270 | 3  |
| -2 | -10 | 1  | 386.785 | 22.9070 | 2  |
| 2  | -10 | -1 | 337.172 | 22.9470 | 2  |
| -2 | 10  | 1  | 332.310 | 20.9488 | 4  |
| -2 | 10  | 1  | 323.635 | 21.2370 | 3  |
| -2 | 10  | 1  | 342.512 | 21.1985 | 3  |
| -2 | 10  | 1  | 331.639 | 20.9657 | 4  |
| 1  | -10 | -1 | 95.9405 | 8.11516 | 2  |
| -1 | -10 | 1  | 90.9815 | 7.64581 | 2  |
| 1  | 10  | -1 | 86.5265 | 6.72126 | 4  |
| -1 | 10  | 1  | 97.6536 | 6.49648 | 4  |
| -1 | 10  | 1  | 94.6665 | 6.40567 | 3  |
| -1 | 10  | 1  | 101.448 | 6.56249 | 4  |
| 0  | -10 | 1  | 79.2020 | 6.62813 | 2  |
| 0  | 10  | -1 | 77.0959 | 5.38206 | 4  |
| 0  | 10  | -1 | 75.8745 | 5.34917 | 4  |
| -1 | -10 | -1 | 132.191 | 11.7350 | 2  |
| 1  | -10 | 1  | 160.294 | 11.3989 | 2  |

|    |     |    |         |         |    |
|----|-----|----|---------|---------|----|
| -1 | 10  | -1 | 171.463 | 10.1037 | 4  |
| -1 | 10  | -1 | 163.444 | 10.0446 | 4  |
| -1 | 10  | -1 | 168.447 | 10.2527 | 3  |
| -2 | -10 | -1 | 570.715 | 41.7799 | 1  |
| -2 | -10 | -1 | 637.048 | 39.7603 | 2  |
| -2 | 10  | -1 | 635.891 | 37.5823 | 3  |
| -3 | -10 | -1 | 227.916 | 17.0479 | 2  |
| -3 | -10 | -1 | 232.539 | 17.6160 | 1  |
| -3 | 10  | -1 | 228.885 | 14.2386 | 3  |
| -3 | 10  | -1 | 237.323 | 14.2261 | 3  |
| -4 | -10 | -1 | 30.0559 | 5.57189 | 2  |
| -4 | -10 | -1 | 38.0324 | 6.45708 | 5  |
| -4 | -10 | -1 | 27.3691 | 5.48306 | 1  |
| -4 | 10  | -1 | 33.5136 | 2.04260 | 6  |
| -5 | -10 | -1 | 5.13291 | 3.39685 | 1  |
| -5 | -10 | -1 | 7.19155 | 3.55625 | 2  |
| -5 | 10  | -1 | 4.24398 | 0.49979 | 9  |
| -5 | 10  | -1 | 3.66095 | 0.39598 | 6  |
| -5 | 10  | -1 | 5.69783 | 1.98799 | 7  |
| -5 | 10  | -1 | 3.56087 | 0.56518 | 9  |
| -5 | 10  | -1 | 4.32554 | 0.43758 | 6  |
| -6 | -10 | -1 | 14.8513 | 4.74246 | 1  |
| -6 | -10 | -1 | 15.1939 | 3.71681 | 10 |
| -6 | 10  | -1 | 24.0622 | 1.56958 | 6  |
| -6 | 10  | -1 | 33.4601 | 4.28878 | 12 |
| -6 | 10  | -1 | 23.2443 | 1.80328 | 9  |
| -6 | 10  | -1 | 22.2446 | 3.31600 | 7  |
| -6 | 10  | -1 | 24.4485 | 1.72372 | 9  |
| -6 | 10  | -1 | 26.1784 | 1.59352 | 6  |
| 6  | 10  | 1  | 17.0703 | 5.33304 | 13 |
| -7 | -10 | -1 | 18.9954 | 3.07434 | 8  |
| -7 | -10 | -1 | 20.2644 | 3.84142 | 10 |
| -7 | -10 | -1 | 22.4560 | 4.97145 | 1  |
| 7  | 10  | 1  | 21.0010 | 4.56556 | 13 |
| -7 | 10  | -1 | 23.7686 | 3.36755 | 7  |
| -7 | 10  | -1 | 23.2990 | 1.49965 | 6  |
| -7 | 10  | -1 | 22.3351 | 1.49257 | 6  |
| -7 | 10  | -1 | 20.4220 | 1.64827 | 9  |
| -8 | -10 | -1 | 0.57238 | 1.28462 | 8  |
| -8 | -10 | -1 | 0.49275 | 1.70142 | 10 |
| -8 | 10  | -1 | 1.91686 | 0.52893 | 9  |
| 8  | 10  | 1  | -2.3428 | 3.36336 | 13 |
| -8 | 10  | -1 | 0.45053 | 1.55990 | 7  |
| -8 | 10  | -1 | 1.00788 | 0.54166 | 9  |
| 9  | 10  | 1  | 7.02178 | 2.70379 | 13 |
| -9 | -11 | 1  | 6.50845 | 2.03374 | 10 |
| 9  | 11  | -1 | 3.80213 | 2.65042 | 13 |
| -9 | 11  | 1  | 4.02412 | 1.19540 | 7  |
| -8 | -11 | 1  | 7.79405 | 2.85998 | 10 |
| -8 | -11 | 1  | 5.81597 | 2.15322 | 8  |

|    |     |    |         |         |    |
|----|-----|----|---------|---------|----|
| -8 | 11  | 1  | 5.83818 | 2.01083 | 7  |
| -8 | 11  | 1  | 7.73904 | 0.71925 | 6  |
| -8 | 11  | 1  | 7.63353 | 0.74747 | 6  |
| 8  | 11  | -1 | 6.66555 | 3.69292 | 13 |
| -8 | 11  | 1  | 9.28066 | 0.96844 | 9  |
| -7 | -11 | 1  | 152.691 | 11.4532 | 10 |
| -7 | -11 | 1  | 155.569 | 14.2623 | 1  |
| 7  | 11  | -1 | 153.581 | 12.0160 | 13 |
| -7 | 11  | 1  | 148.047 | 9.05899 | 6  |
| -7 | 11  | 1  | 144.980 | 10.3781 | 7  |
| -7 | 11  | 1  | 139.514 | 9.04341 | 6  |
| -7 | 11  | 1  | 144.817 | 9.19915 | 9  |
| -6 | -11 | 1  | 34.3570 | 5.34324 | 10 |
| -6 | -11 | 1  | 38.0118 | 8.10740 | 1  |
| 6  | 11  | -1 | 41.6038 | 6.22142 | 13 |
| -6 | 11  | 1  | 49.1693 | 2.92928 | 6  |
| -6 | 11  | 1  | 43.2852 | 4.49508 | 7  |
| -6 | 11  | 1  | 48.5992 | 2.93631 | 6  |
| -6 | 11  | 1  | 47.3136 | 3.11307 | 9  |
| -6 | 11  | 1  | 42.3653 | 5.84886 | 12 |
| 5  | -11 | -1 | 11.5231 | 4.22657 | 2  |
| -5 | -11 | 1  | 15.3467 | 4.02946 | 2  |
| -5 | -11 | 1  | 13.3939 | 5.07790 | 1  |
| -5 | 11  | 1  | 9.14371 | 0.82588 | 6  |
| -5 | 11  | 1  | 9.04485 | 1.93957 | 7  |
| -5 | 11  | 1  | 7.85538 | 1.19616 | 3  |
| -5 | 11  | 1  | 9.21155 | 1.14878 | 9  |
| -5 | 11  | 1  | 7.33348 | 1.29595 | 3  |
| -5 | 11  | 1  | 8.65052 | 0.79130 | 6  |
| 4  | -11 | -1 | 98.4608 | 9.08682 | 2  |
| -4 | -11 | 1  | 88.9218 | 10.1152 | 1  |
| -4 | -11 | 1  | 87.2741 | 8.86643 | 2  |
| -4 | 11  | 1  | 98.0399 | 6.46963 | 3  |
| -4 | 11  | 1  | 99.6937 | 6.36126 | 3  |
| 3  | -11 | -1 | 2.34900 | 2.31713 | 2  |
| -3 | -11 | 1  | 5.22001 | 2.42619 | 2  |
| -3 | 11  | 1  | 2.20496 | 0.87516 | 3  |
| -3 | 11  | 1  | 2.33215 | 0.83505 | 3  |
| -2 | -11 | 1  | 101.896 | 8.70988 | 2  |
| 2  | -11 | -1 | 106.914 | 8.95438 | 2  |
| -2 | 11  | 1  | 101.114 | 6.72143 | 4  |
| -2 | 11  | 1  | 105.490 | 6.71486 | 4  |
| -2 | 11  | 1  | 108.760 | 7.04913 | 3  |
| -1 | -11 | 1  | 109.083 | 9.10268 | 2  |
| 1  | -11 | -1 | 120.611 | 9.47186 | 2  |
| 1  | 11  | -1 | 104.198 | 8.06076 | 4  |
| -1 | 11  | 1  | 120.953 | 7.86737 | 4  |
| -1 | 11  | 1  | 122.498 | 7.89607 | 3  |
| -1 | 11  | 1  | 125.336 | 7.85562 | 4  |
| 0  | -11 | 1  | 1214.36 | 76.0049 | 2  |

|    |     |    |         |         |    |
|----|-----|----|---------|---------|----|
| 0  | -11 | -1 | 1240.07 | 76.4504 | 2  |
| 0  | 11  | -1 | 1208.19 | 74.9312 | 4  |
| 0  | 11  | 1  | 1221.03 | 75.1074 | 3  |
| 0  | 11  | 1  | 1260.30 | 75.1488 | 4  |
| -1 | -11 | -1 | 87.4015 | 8.04520 | 2  |
| -1 | 11  | -1 | 85.0262 | 5.74832 | 4  |
| -1 | 11  | -1 | 93.5785 | 5.81079 | 4  |
| -1 | 11  | -1 | 86.0055 | 5.99654 | 3  |
| -2 | -11 | -1 | 286.359 | 19.5670 | 2  |
| -2 | 11  | -1 | 265.338 | 17.1672 | 3  |
| -2 | 11  | -1 | 280.753 | 17.1830 | 3  |
| -3 | -11 | -1 | 116.394 | 10.4494 | 1  |
| -3 | -11 | -1 | 123.084 | 10.0422 | 2  |
| -3 | 11  | -1 | 103.284 | 6.92121 | 3  |
| -3 | 11  | -1 | 106.309 | 6.93046 | 3  |
| -4 | -11 | -1 | 63.4191 | 7.18253 | 2  |
| -4 | 11  | -1 | 46.4342 | 2.99754 | 6  |
| -4 | 11  | -1 | 48.6376 | 3.01187 | 6  |
| -5 | -11 | -1 | 23.0679 | 5.19238 | 2  |
| -5 | -11 | -1 | 27.4158 | 6.11182 | 1  |
| -5 | -11 | -1 | 20.3460 | 3.77756 | 10 |
| -5 | 11  | -1 | 17.0623 | 2.64020 | 7  |
| -5 | 11  | -1 | 13.7338 | 0.92955 | 6  |
| -5 | 11  | -1 | 12.0149 | 1.06179 | 9  |
| -5 | 11  | -1 | 12.9385 | 1.04499 | 9  |
| -5 | 11  | -1 | 12.7835 | 0.92091 | 6  |
| -6 | -11 | -1 | 22.2507 | 6.14378 | 1  |
| -6 | -11 | -1 | 18.5378 | 3.58290 | 10 |
| -6 | 11  | -1 | 11.2019 | 1.01154 | 9  |
| -6 | 11  | -1 | 10.6646 | 0.84728 | 6  |
| 6  | 11  | 1  | 18.9678 | 4.73398 | 13 |
| -6 | 11  | -1 | 10.5733 | 1.10799 | 9  |
| -6 | 11  | -1 | 10.1015 | 2.30675 | 7  |
| -6 | 11  | -1 | 10.8664 | 2.86573 | 12 |
| -6 | 11  | -1 | 11.3962 | 0.85486 | 6  |
| -7 | -11 | -1 | 193.321 | 13.8769 | 8  |
| -7 | -11 | -1 | 199.124 | 14.6491 | 10 |
| -7 | -11 | -1 | 174.866 | 15.8150 | 1  |
| -7 | 11  | -1 | 202.359 | 12.5810 | 9  |
| -7 | 11  | -1 | 211.529 | 12.5692 | 9  |
| -7 | 11  | -1 | 216.061 | 12.4544 | 6  |
| -7 | 11  | -1 | 206.755 | 13.7833 | 7  |
| -7 | 11  | -1 | 211.582 | 12.4579 | 6  |
| 7  | 11  | 1  | 228.456 | 16.0299 | 13 |
| -8 | -11 | -1 | 16.5583 | 3.02583 | 10 |
| -8 | -11 | -1 | 13.1544 | 2.44205 | 8  |
| 8  | 11  | 1  | 12.8660 | 3.71161 | 13 |
| -8 | 11  | -1 | 7.91284 | 1.68384 | 7  |
| 9  | 11  | 1  | 3.70373 | 2.30328 | 13 |
| -9 | -12 | 1  | 10.9343 | 2.16848 | 10 |

|    |     |    |         |         |    |
|----|-----|----|---------|---------|----|
| -8 | 12  | 1  | 21.8420 | 3.25864 | 7  |
| 8  | 12  | -1 | 26.7727 | 4.91165 | 13 |
| -8 | 12  | 1  | 20.0723 | 1.77825 | 9  |
| -8 | 12  | 1  | 25.2861 | 1.66402 | 9  |
| -7 | -12 | 1  | 28.6384 | 4.99782 | 10 |
| -7 | -12 | 1  | 26.0552 | 5.90948 | 1  |
| 7  | 12  | -1 | 25.0845 | 4.60315 | 13 |
| -7 | 12  | 1  | 32.2677 | 2.27057 | 9  |
| -7 | 12  | 1  | 36.5362 | 4.03656 | 7  |
| -7 | 12  | 1  | 31.8848 | 2.07937 | 6  |
| -7 | 12  | 1  | 32.4430 | 2.06539 | 6  |
| -6 | -12 | 1  | 89.8122 | 8.39382 | 10 |
| -6 | -12 | 1  | 108.368 | 11.4163 | 1  |
| -6 | 12  | 1  | 95.4493 | 7.34919 | 7  |
| 6  | 12  | -1 | 91.8487 | 9.46601 | 13 |
| -6 | 12  | 1  | 98.1227 | 5.96788 | 6  |
| -6 | 12  | 1  | 96.5890 | 6.11487 | 9  |
| -6 | 12  | 1  | 96.3977 | 5.97316 | 6  |
| 5  | -12 | -1 | 12.1315 | 3.79613 | 2  |
| -5 | -12 | 1  | 15.0666 | 4.21774 | 2  |
| -5 | -12 | 1  | 16.7016 | 5.09275 | 1  |
| -5 | 12  | 1  | 13.7350 | 1.06907 | 6  |
| -5 | 12  | 1  | 15.3601 | 1.10578 | 6  |
| -5 | 12  | 1  | 11.6559 | 1.77702 | 3  |
| -5 | 12  | 1  | 14.3179 | 2.37938 | 7  |
| -5 | 12  | 1  | 13.7844 | 1.39785 | 9  |
| -4 | -12 | 1  | 211.173 | 16.4335 | 2  |
| -4 | -12 | 1  | 202.182 | 17.2442 | 1  |
| 4  | -12 | -1 | 213.466 | 16.4864 | 2  |
| -4 | 12  | 1  | 215.567 | 13.0517 | 6  |
| -4 | 12  | 1  | 210.121 | 13.6188 | 3  |
| -4 | 12  | 1  | 219.389 | 13.5289 | 3  |
| -4 | 12  | 1  | 221.546 | 13.1245 | 6  |
| -3 | -12 | 1  | 593.363 | 36.4921 | 2  |
| 3  | -12 | -1 | 518.909 | 36.0589 | 2  |
| -3 | 12  | 1  | 540.329 | 33.8739 | 3  |
| -2 | -12 | 1  | 91.4284 | 7.31987 | 2  |
| 2  | -12 | -1 | 72.6292 | 7.28921 | 2  |
| -2 | 12  | 1  | 73.8241 | 4.96115 | 4  |
| -2 | 12  | 1  | 70.4991 | 4.93639 | 4  |
| -2 | 12  | 1  | 73.7717 | 5.34737 | 3  |
| 1  | -12 | -1 | 1087.45 | 68.1643 | 2  |
| -1 | -12 | 1  | 1129.80 | 67.9338 | 2  |
| -1 | 12  | 1  | 1043.19 | 66.4037 | 4  |
| -1 | 12  | 1  | 1033.65 | 67.0513 | 4  |
| 1  | 12  | -1 | 1127.42 | 66.8427 | 4  |
| -1 | 12  | 1  | 1104.62 | 66.5603 | 3  |
| 0  | -12 | -1 | 78.7322 | 7.54111 | 2  |
| 0  | 12  | -1 | 83.7989 | 5.70440 | 4  |
| 0  | 12  | 1  | 73.3538 | 5.94042 | 4  |

|    |     |    |         |         |    |
|----|-----|----|---------|---------|----|
| 0  | 12  | -1 | 82.7811 | 5.87635 | 3  |
| -1 | -12 | -1 | 511.267 | 35.3294 | 2  |
| -1 | 12  | -1 | 550.050 | 33.3714 | 4  |
| -1 | 12  | -1 | 571.429 | 33.6822 | 3  |
| -2 | -12 | -1 | 279.088 | 20.2320 | 2  |
| -2 | 12  | -1 | 302.785 | 18.0590 | 3  |
| -2 | 12  | -1 | 284.114 | 18.0180 | 3  |
| -3 | -12 | -1 | 1.42513 | 2.83368 | 1  |
| -3 | -12 | -1 | 2.71638 | 2.50625 | 2  |
| -3 | 12  | -1 | 9.69860 | 1.06440 | 3  |
| -4 | -12 | -1 | 35.8592 | 6.02974 | 2  |
| -4 | -12 | -1 | 39.1786 | 7.51308 | 1  |
| -4 | 12  | -1 | 36.5452 | 2.35205 | 6  |
| -4 | 12  | -1 | 40.0294 | 2.47718 | 9  |
| -4 | 12  | -1 | 37.0851 | 2.36609 | 6  |
| -4 | 12  | -1 | 38.8190 | 3.70170 | 7  |
| -5 | -12 | -1 | 5.02847 | 2.90194 | 10 |
| -5 | -12 | -1 | 5.22558 | 3.75400 | 1  |
| -5 | -12 | -1 | 7.99545 | 3.76483 | 2  |
| -5 | 12  | -1 | 7.44211 | 0.68849 | 9  |
| -5 | 12  | -1 | 6.02346 | 2.23395 | 7  |
| -5 | 12  | -1 | 6.17237 | 0.52587 | 6  |
| -5 | 12  | -1 | 7.53785 | 0.73507 | 9  |
| -5 | 12  | -1 | 6.25878 | 0.51195 | 6  |
| -5 | 12  | -1 | 1.73004 | 2.63540 | 12 |
| -6 | -12 | -1 | 155.397 | 15.0393 | 1  |
| -6 | -12 | -1 | 155.770 | 12.6259 | 10 |
| -6 | 12  | -1 | 174.237 | 10.3444 | 9  |
| -6 | 12  | -1 | 173.229 | 11.6708 | 7  |
| 6  | 12  | 1  | 149.443 | 13.2855 | 13 |
| -6 | 12  | -1 | 181.267 | 10.3637 | 9  |
| -6 | 12  | -1 | 183.124 | 12.1916 | 12 |
| -7 | -12 | -1 | 14.2222 | 3.06387 | 10 |
| 7  | 12  | 1  | 11.9603 | 4.67798 | 13 |
| -7 | 12  | -1 | 13.8328 | 3.16076 | 12 |
| -7 | 12  | -1 | 17.8507 | 2.75341 | 7  |
| -8 | -12 | -1 | 27.8008 | 3.95542 | 10 |
| -8 | -12 | -1 | 30.4682 | 3.60821 | 8  |
| 8  | 12  | 1  | 23.2713 | 4.06466 | 13 |
| -9 | -13 | 1  | 18.2950 | 2.66683 | 10 |
| -8 | -13 | 1  | 12.7408 | 3.13238 | 10 |
| -8 | 13  | 1  | 8.07265 | 2.11180 | 7  |
| -7 | -13 | 1  | 38.1572 | 5.45787 | 10 |
| -7 | -13 | 1  | 31.1057 | 8.35881 | 1  |
| -7 | 13  | 1  | 34.8445 | 2.37953 | 6  |
| -7 | 13  | 1  | 32.5591 | 2.35118 | 6  |
| -7 | 13  | 1  | 36.1242 | 4.23921 | 7  |
| 7  | 13  | -1 | 30.8643 | 5.90546 | 13 |
| -7 | 13  | 1  | 45.0777 | 2.66519 | 9  |
| -7 | 13  | 1  | 41.7968 | 2.56913 | 9  |



|    |     |    |         |         |    |
|----|-----|----|---------|---------|----|
| -6 | -13 | 1  | 26.5589 | 4.80172 | 10 |
| -6 | -13 | 1  | 28.5832 | 6.46894 | 1  |
| -6 | 13  | 1  | 23.6461 | 3.51979 | 7  |
| -6 | 13  | 1  | 23.9705 | 1.69073 | 6  |
| -6 | 13  | 1  | 26.3638 | 1.71851 | 6  |
| -6 | 13  | 1  | 23.9515 | 1.86023 | 9  |
| -5 | -13 | 1  | 194.761 | 16.8628 | 1  |
| -5 | -13 | 1  | 166.153 | 13.3194 | 10 |
| -5 | -13 | 1  | 181.137 | 15.2161 | 2  |
| -5 | 13  | 1  | 181.020 | 11.1245 | 6  |
| -5 | 13  | 1  | 184.555 | 13.0971 | 12 |
| -5 | 13  | 1  | 183.751 | 11.3082 | 9  |
| -5 | 13  | 1  | 187.426 | 12.2908 | 7  |
| -5 | 13  | 1  | 180.429 | 11.1350 | 6  |
| 4  | -13 | -1 | 5.71998 | 3.02548 | 2  |
| -4 | -13 | 1  | 18.5439 | 4.10359 | 2  |
| -4 | -13 | 1  | 19.8835 | 5.10429 | 1  |
| -4 | 13  | 1  | 9.81789 | 0.84807 | 6  |
| -4 | 13  | 1  | 6.66325 | 1.21342 | 3  |
| -4 | 13  | 1  | 11.0546 | 2.02213 | 7  |
| 3  | -13 | -1 | 262.183 | 18.9456 | 2  |
| -3 | -13 | 1  | 255.056 | 18.9214 | 2  |
| -3 | 13  | 1  | 261.317 | 16.4384 | 3  |
| 2  | -13 | -1 | 40.4404 | 5.48844 | 2  |
| -2 | 13  | 1  | 40.6634 | 3.41166 | 3  |
| -2 | 13  | 1  | 39.7746 | 2.89028 | 4  |
| -2 | 13  | 1  | 40.7207 | 2.88899 | 4  |
| 1  | -13 | -1 | 271.788 | 19.0284 | 2  |
| -1 | 13  | 1  | 268.970 | 17.0853 | 4  |
| -1 | 13  | 1  | 267.961 | 17.2532 | 3  |
| 0  | -13 | -1 | 213.063 | 16.1109 | 2  |
| 0  | 13  | -1 | 215.835 | 14.2182 | 3  |
| 0  | 13  | 1  | 219.972 | 14.3687 | 4  |
| 0  | 13  | -1 | 223.409 | 14.1207 | 4  |
| -1 | -13 | -1 | 82.2888 | 7.83789 | 2  |
| -1 | 13  | -1 | 77.2334 | 5.42020 | 4  |
| -1 | 13  | -1 | 82.7812 | 5.50558 | 4  |
| -1 | 13  | -1 | 87.5211 | 5.90737 | 3  |
| -2 | -13 | -1 | 53.8129 | 6.36776 | 2  |
| -2 | 13  | -1 | 46.9003 | 3.60218 | 3  |
| -2 | 13  | -1 | 43.7636 | 3.54542 | 3  |
| -3 | 13  | -1 | 5.74020 | 0.65029 | 6  |
| -3 | 13  | -1 | 8.29696 | 1.12668 | 3  |
| -3 | 13  | -1 | 6.04912 | 0.95963 | 3  |
| -4 | -13 | -1 | 56.3384 | 7.27185 | 2  |
| -4 | -13 | -1 | 48.3201 | 7.70985 | 1  |
| -4 | 13  | -1 | 47.9668 | 3.23701 | 9  |
| -4 | 13  | -1 | 51.3569 | 3.27475 | 9  |
| -4 | 13  | -1 | 51.5116 | 3.16109 | 6  |
| -4 | 13  | -1 | 53.0693 | 3.17953 | 6  |

|    |     |    |         |         |    |
|----|-----|----|---------|---------|----|
| -4 | 13  | -1 | 50.5405 | 4.45014 | 7  |
| -5 | -13 | -1 | 11.0633 | 5.08413 | 2  |
| -5 | -13 | -1 | 17.6120 | 3.87529 | 10 |
| -5 | -13 | -1 | 7.84990 | 4.31834 | 1  |
| -5 | 13  | -1 | 8.49278 | 3.74727 | 12 |
| -5 | 13  | -1 | 13.0578 | 2.44744 | 7  |
| -5 | 13  | -1 | 9.33365 | 0.97396 | 9  |
| -5 | 13  | -1 | 11.8006 | 0.89887 | 9  |
| 5  | 13  | 1  | 14.7896 | 4.44758 | 13 |
| -6 | -13 | -1 | 0.49188 | 4.78116 | 1  |
| -6 | -13 | -1 | 1.64326 | 2.76453 | 10 |
| 6  | 13  | 1  | 4.77888 | 3.27630 | 13 |
| -6 | 13  | -1 | 6.20911 | 2.11763 | 7  |
| -6 | 13  | -1 | 2.25190 | 2.67176 | 12 |
| -7 | -13 | -1 | 2.22958 | 2.91577 | 10 |
| 7  | 13  | 1  | 2.87304 | 3.38329 | 13 |
| -7 | 13  | -1 | 5.92150 | 1.74298 | 7  |
| -8 | -13 | -1 | 19.9836 | 2.96632 | 10 |
| 8  | 13  | 1  | 23.4950 | 4.24313 | 13 |
| -8 | -14 | 1  | 1.72176 | 2.68461 | 10 |
| -8 | 14  | 1  | 1.27739 | 1.76413 | 7  |
| -7 | -14 | 1  | 7.36397 | 3.19964 | 10 |
| -7 | 14  | 1  | 7.14994 | 2.20965 | 7  |
| -7 | 14  | 1  | 4.84482 | 0.59733 | 9  |
| -7 | 14  | 1  | 4.90062 | 0.69521 | 9  |
| -6 | -14 | 1  | 80.3068 | 10.4691 | 1  |
| -6 | -14 | 1  | 78.2093 | 7.61077 | 10 |
| -6 | 14  | 1  | 79.1886 | 4.83899 | 6  |
| -6 | 14  | 1  | 78.8210 | 6.42690 | 7  |
| -6 | 14  | 1  | 77.8247 | 4.97541 | 9  |
| -6 | 14  | 1  | 74.9215 | 4.81943 | 6  |
| -5 | -14 | 1  | 70.9686 | 9.80974 | 1  |
| -5 | 14  | 1  | 75.2067 | 4.93295 | 9  |
| -5 | 14  | 1  | 76.6915 | 4.72135 | 6  |
| -5 | 14  | 1  | 73.6686 | 4.70704 | 6  |
| -5 | 14  | 1  | 78.2720 | 6.44128 | 7  |
| -4 | 14  | 1  | 110.770 | 6.72028 | 6  |
| -4 | 14  | 1  | 105.628 | 7.25173 | 3  |
| -4 | 14  | 1  | 110.487 | 6.95705 | 9  |
| -4 | 14  | 1  | 106.208 | 7.75840 | 7  |
| 3  | -14 | -1 | 12.4717 | 3.99716 | 2  |
| -3 | 14  | 1  | 13.0957 | 1.79412 | 3  |
| -3 | 14  | 1  | 12.2624 | 1.08865 | 6  |
| 2  | -14 | -1 | 39.4507 | 6.04345 | 2  |
| -2 | 14  | 1  | 35.9060 | 2.58522 | 4  |
| -2 | 14  | 1  | 35.5202 | 2.56762 | 4  |
| -2 | 14  | 1  | 35.5371 | 3.27038 | 3  |
| 1  | -14 | -1 | 132.623 | 10.9630 | 2  |
| -1 | 14  | 1  | 120.684 | 8.48281 | 4  |
| -1 | 14  | 1  | 125.151 | 8.70799 | 3  |

|    |     |    |         |         |    |
|----|-----|----|---------|---------|----|
| 0  | -14 | -1 | 55.6702 | 6.38040 | 2  |
| 0  | 14  | -1 | 43.8850 | 4.24371 | 4  |
| 0  | 14  | 1  | 64.1215 | 4.70255 | 4  |
| -1 | -14 | -1 | 120.284 | 9.92783 | 2  |
| -1 | 14  | -1 | 112.627 | 7.77107 | 3  |
| -1 | 14  | -1 | 107.439 | 7.22829 | 4  |
| -1 | 14  | -1 | 109.819 | 7.26821 | 4  |
| -2 | -14 | -1 | 2.16674 | 2.82976 | 2  |
| -2 | 14  | -1 | 2.04418 | 0.90465 | 3  |
| -3 | -14 | -1 | 50.3152 | 6.93948 | 2  |
| -3 | 14  | -1 | 40.9457 | 3.12460 | 3  |
| -3 | 14  | -1 | 43.2138 | 2.70934 | 6  |
| -3 | 14  | -1 | 40.9641 | 3.14233 | 3  |
| -4 | -14 | -1 | 3.17638 | 3.20315 | 2  |
| -4 | -14 | -1 | 5.37175 | 4.00656 | 1  |
| -4 | 14  | -1 | 4.09550 | 1.70969 | 7  |
| -4 | 14  | -1 | 5.22084 | 0.52370 | 6  |
| -4 | 14  | -1 | 4.61647 | 0.55674 | 9  |
| -4 | 14  | -1 | 4.53299 | 0.46730 | 6  |
| -4 | 14  | -1 | 4.07077 | 0.66764 | 9  |
| -5 | -14 | -1 | 15.9374 | 5.33383 | 1  |
| -5 | -14 | -1 | 14.6283 | 3.77266 | 10 |
| -5 | 14  | -1 | 15.6440 | 3.36188 | 12 |
| -5 | 14  | -1 | 19.8224 | 2.80562 | 7  |
| -5 | 14  | -1 | 15.9748 | 1.11589 | 9  |
| -5 | 14  | -1 | 15.0443 | 1.13001 | 9  |
| -6 | -14 | -1 | 10.9873 | 4.85659 | 1  |
| -6 | -14 | -1 | 10.0349 | 2.81846 | 10 |
| -6 | 14  | -1 | 4.71676 | 2.94184 | 12 |
| -6 | 14  | -1 | 7.24182 | 2.29335 | 7  |
| -7 | -14 | -1 | 8.24554 | 2.58700 | 10 |
| -8 | -14 | -1 | 52.5066 | 5.01292 | 10 |
| -8 | -14 | -1 | 54.6288 | 5.13033 | 10 |
| -8 | -15 | 1  | -1.1441 | 2.30379 | 10 |
| -7 | -15 | 1  | 3.25101 | 2.95096 | 10 |
| -7 | 15  | 1  | 6.29124 | 2.18877 | 7  |
| -6 | -15 | 1  | 6.18457 | 2.51619 | 10 |
| -6 | -15 | 1  | 8.17936 | 4.92662 | 1  |
| -6 | 15  | 1  | 4.53775 | 0.74419 | 9  |
| -6 | 15  | 1  | 4.24442 | 0.66994 | 9  |
| -6 | 15  | 1  | 4.50831 | 0.51454 | 6  |
| -6 | 15  | 1  | 4.74069 | 0.49190 | 6  |
| -6 | 15  | 1  | 2.46078 | 2.08110 | 7  |
| -5 | 15  | 1  | 63.0141 | 3.94355 | 6  |
| -5 | 15  | 1  | 58.5886 | 5.35029 | 7  |
| -5 | 15  | 1  | 58.9949 | 3.93616 | 6  |
| -5 | 15  | 1  | 68.3668 | 4.20579 | 9  |
| -4 | 15  | 1  | 89.9915 | 5.97807 | 9  |
| -4 | 15  | 1  | 90.9074 | 5.68600 | 6  |
| 4  | 15  | -1 | 98.0084 | 9.04384 | 10 |

|    |     |    |         |         |    |
|----|-----|----|---------|---------|----|
| -4 | 15  | 1  | 88.0476 | 6.84152 | 7  |
| -3 | 15  | 1  | 20.9306 | 2.78771 | 7  |
| -3 | 15  | 1  | 16.0925 | 2.10605 | 3  |
| -3 | 15  | 1  | 14.4554 | 1.82445 | 9  |
| -3 | 15  | 1  | 17.0417 | 1.30132 | 6  |
| 2  | -15 | -1 | 313.204 | 22.5620 | 2  |
| -2 | 15  | 1  | 324.073 | 20.3703 | 3  |
| 1  | -15 | -1 | 13.0805 | 4.03337 | 2  |
| -1 | 15  | 1  | 13.5764 | 2.10018 | 4  |
| 0  | -15 | -1 | 13.7053 | 3.59677 | 2  |
| 0  | 15  | 1  | 11.1726 | 1.99335 | 4  |
| 0  | 15  | -1 | 9.71663 | 1.88131 | 4  |
| -1 | -15 | -1 | 1.62405 | 2.79278 | 2  |
| -1 | 15  | -1 | 1.16155 | 0.80108 | 4  |
| -1 | 15  | -1 | 1.09790 | 0.94517 | 3  |
| -1 | 15  | -1 | 1.92198 | 0.81561 | 4  |
| -2 | -15 | -1 | 24.6268 | 4.99469 | 2  |
| -2 | 15  | -1 | 18.0332 | 2.11401 | 3  |
| -2 | 15  | -1 | 18.6764 | 1.42972 | 6  |
| -3 | -15 | -1 | 3.12308 | 2.94628 | 2  |
| -3 | 15  | -1 | 5.43722 | 0.63075 | 6  |
| -3 | 15  | -1 | 4.43766 | 0.88580 | 9  |
| -3 | 15  | -1 | 4.90685 | 0.55463 | 6  |
| -3 | 15  | -1 | 5.03380 | 0.98044 | 3  |
| -3 | 15  | -1 | 5.28777 | 0.98496 | 3  |
| -4 | -15 | -1 | 258.795 | 20.1513 | 1  |
| -4 | -15 | -1 | 231.387 | 19.0593 | 2  |
| -4 | 15  | -1 | 241.112 | 14.6290 | 9  |
| 4  | 15  | 1  | 240.668 | 17.5509 | 10 |
| -4 | 15  | -1 | 228.465 | 14.5452 | 9  |
| -4 | 15  | -1 | 235.096 | 14.4891 | 6  |
| -4 | 15  | -1 | 244.634 | 14.4694 | 6  |
| -4 | 15  | -1 | 229.027 | 16.0787 | 12 |
| -5 | -15 | -1 | 7.55649 | 4.70783 | 1  |
| -5 | -15 | -1 | 12.8757 | 3.54415 | 10 |
| -5 | 15  | -1 | 5.29705 | 0.63757 | 9  |
| -5 | 15  | -1 | 5.90172 | 0.57404 | 9  |
| -5 | 15  | -1 | 4.60962 | 2.90772 | 12 |
| -6 | -15 | -1 | 271.321 | 21.6975 | 1  |
| -6 | -15 | -1 | 278.345 | 18.9105 | 10 |
| -6 | 15  | -1 | 258.277 | 18.0659 | 12 |
| -7 | -15 | -1 | 60.1432 | 6.41179 | 10 |
| -8 | -15 | -1 | 9.78467 | 2.58793 | 10 |
| -8 | -15 | -1 | 7.02762 | 2.23319 | 10 |
| -8 | -16 | 1  | 5.27488 | 1.96364 | 10 |
| -7 | -16 | 1  | 4.63245 | 2.54604 | 10 |
| -6 | -16 | 1  | 122.693 | 10.7583 | 10 |
| -6 | -16 | 1  | 130.003 | 13.6828 | 1  |
| -6 | 16  | 1  | 131.272 | 8.07067 | 9  |
| -6 | 16  | 1  | 131.427 | 8.08105 | 9  |

|    |     |    |         |         |    |
|----|-----|----|---------|---------|----|
| -6 | 16  | 1  | 131.821 | 9.44198 | 7  |
| -6 | 16  | 1  | 133.507 | 7.94243 | 6  |
| -6 | 16  | 1  | 128.386 | 7.93558 | 6  |
| -5 | -16 | 1  | 20.9538 | 6.80046 | 1  |
| -5 | 16  | 1  | 7.87980 | 0.79273 | 6  |
| 5  | 16  | -1 | 14.8252 | 4.34302 | 10 |
| -5 | 16  | 1  | 9.78981 | 2.34578 | 7  |
| -5 | 16  | 1  | 8.62154 | 0.86419 | 6  |
| -5 | 16  | 1  | 8.91965 | 1.17522 | 9  |
| -4 | -16 | 1  | 6.42923 | 2.50931 | 13 |
| -4 | 16  | 1  | 8.01921 | 2.13805 | 7  |
| -4 | 16  | 1  | 4.76297 | 1.08426 | 9  |
| 4  | 16  | -1 | 8.56691 | 4.07576 | 10 |
| -4 | 16  | 1  | 6.82998 | 0.72377 | 6  |
| -3 | 16  | 1  | 46.0945 | 3.00971 | 6  |
| -3 | 16  | 1  | 44.2371 | 3.44255 | 9  |
| -2 | 16  | 1  | 49.4723 | 4.28544 | 3  |
| 1  | -16 | -1 | 91.8845 | 10.2160 | 2  |
| -1 | 16  | 1  | 94.2794 | 6.66074 | 4  |
| 0  | -16 | -1 | 269.936 | 19.2615 | 2  |
| 0  | 16  | 1  | 261.362 | 17.1144 | 4  |
| 0  | 16  | -1 | 254.140 | 16.9108 | 4  |
| -1 | -16 | -1 | 81.9084 | 8.75592 | 2  |
| -1 | 16  | -1 | 82.7293 | 6.38326 | 3  |
| -1 | 16  | -1 | 87.8063 | 5.64545 | 4  |
| -1 | 16  | -1 | 88.6133 | 5.64765 | 4  |
| -2 | -16 | -1 | 5.46422 | 3.00538 | 2  |
| -2 | 16  | -1 | 3.32027 | 1.05008 | 9  |
| -2 | 16  | -1 | 4.00002 | 1.24295 | 3  |
| -2 | 16  | -1 | 4.19708 | 0.60879 | 6  |
| -3 | -16 | -1 | 13.5730 | 4.15217 | 2  |
| -3 | 16  | -1 | 4.31582 | 0.57973 | 6  |
| -3 | 16  | -1 | 2.86052 | 0.97375 | 9  |
| 3  | 16  | 1  | 11.0467 | 4.22602 | 10 |
| -4 | 16  | -1 | 40.4556 | 2.57027 | 6  |
| 4  | 16  | 1  | 56.9251 | 7.30272 | 10 |
| -4 | 16  | -1 | 40.3582 | 5.38355 | 12 |
| -4 | 16  | -1 | 39.4603 | 2.61172 | 6  |
| -4 | 16  | -1 | 39.1709 | 2.82529 | 9  |
| -4 | 16  | -1 | 40.2404 | 2.68126 | 9  |
| -5 | -16 | -1 | 4.08577 | 4.33275 | 1  |
| -5 | 16  | -1 | 3.14372 | 3.52563 | 12 |
| -6 | -16 | -1 | 49.8121 | 5.51523 | 10 |
| -7 | -16 | -1 | 17.3640 | 3.51676 | 10 |
| -8 | -16 | -1 | 16.6403 | 2.84338 | 10 |
| -8 | -16 | -1 | 17.5016 | 3.03221 | 10 |
| -8 | -17 | 1  | 3.43484 | 2.24409 | 10 |
| -7 | -17 | 1  | -1.7095 | 2.51742 | 10 |
| -6 | -17 | 1  | 41.2793 | 5.13207 | 10 |
| 6  | 17  | -1 | 41.5570 | 5.88267 | 10 |

|    |     |    |         |         |    |
|----|-----|----|---------|---------|----|
| -6 | 17  | 1  | 45.0703 | 2.84818 | 9  |
| -6 | 17  | 1  | 44.5439 | 2.83649 | 9  |
| -5 | -17 | 1  | 38.7376 | 8.17570 | 1  |
| -5 | 17  | 1  | 24.5435 | 2.02568 | 9  |
| 5  | 17  | -1 | 39.0949 | 6.47426 | 10 |
| -5 | 17  | 1  | 24.2291 | 1.76587 | 6  |
| -5 | 17  | 1  | 24.9921 | 1.75964 | 6  |
| -4 | -17 | 1  | 11.8544 | 2.67837 | 13 |
| 4  | 17  | -1 | 17.1633 | 4.20106 | 10 |
| -3 | -17 | 1  | 14.6342 | 3.59369 | 13 |
| -3 | 17  | 1  | 25.5566 | 1.69601 | 6  |
| 3  | 17  | -1 | 21.5069 | 4.32925 | 10 |
| -3 | 17  | 1  | 24.4677 | 2.44858 | 9  |
| -2 | 17  | 1  | 197.481 | 13.2427 | 3  |
| 0  | 17  | 1  | 2.06219 | 1.37949 | 4  |
| -1 | -17 | -1 | 27.7169 | 5.36404 | 2  |
| -1 | 17  | -1 | 24.2197 | 3.77740 | 3  |
| -2 | -17 | -1 | 17.1881 | 4.71362 | 2  |
| 2  | 17  | 1  | 21.8180 | 4.24387 | 10 |
| -2 | 17  | -1 | 18.2192 | 1.45261 | 6  |
| -2 | 17  | -1 | 17.4691 | 2.13826 | 9  |
| -3 | -17 | -1 | 109.436 | 11.3820 | 2  |
| -3 | -17 | -1 | 101.710 | 8.77048 | 13 |
| 3  | 17  | 1  | 109.117 | 9.90020 | 10 |
| -3 | 17  | -1 | 98.0956 | 8.61020 | 12 |
| -3 | 17  | -1 | 111.286 | 6.66893 | 6  |
| -3 | 17  | -1 | 112.721 | 7.02123 | 9  |
| -4 | -17 | -1 | 44.0288 | 7.55595 | 13 |
| -4 | 17  | -1 | 44.7620 | 3.16522 | 9  |
| -4 | 17  | -1 | 49.8841 | 3.25232 | 9  |
| -4 | 17  | -1 | 46.3069 | 2.95509 | 6  |
| 4  | 17  | 1  | 39.4176 | 6.96293 | 10 |
| -4 | 17  | -1 | 51.1244 | 5.69679 | 12 |
| -4 | 17  | -1 | 48.0413 | 2.99917 | 6  |
| 5  | 17  | 1  | 35.8583 | 6.62255 | 10 |
| -6 | -17 | -1 | 19.9787 | 3.98632 | 10 |
| -7 | -17 | -1 | 60.3142 | 5.53759 | 10 |
| -7 | -18 | 1  | 11.5549 | 3.08471 | 10 |
| 6  | 18  | -1 | 9.44458 | 4.22425 | 10 |
| -5 | 18  | 1  | 80.7137 | 5.14636 | 6  |
| -5 | 18  | 1  | 80.7923 | 5.12826 | 6  |
| -5 | 18  | 1  | 84.7387 | 5.38931 | 9  |
| 5  | 18  | -1 | 87.4952 | 9.02014 | 10 |
| -4 | -18 | 1  | 51.2491 | 5.40469 | 13 |
| -4 | 18  | 1  | 47.9692 | 3.61617 | 9  |
| 4  | 18  | -1 | 47.4107 | 5.92738 | 10 |
| -4 | 18  | 1  | 48.3417 | 3.17870 | 6  |
| -3 | -18 | 1  | 12.4468 | 3.21454 | 13 |
| -3 | 18  | 1  | 7.24135 | 1.29684 | 9  |
| 3  | 18  | -1 | 10.7816 | 3.89810 | 10 |

|    |     |    |         |         |    |
|----|-----|----|---------|---------|----|
| -3 | 18  | 1  | 6.42568 | 0.87914 | 6  |
| -2 | 18  | 1  | 110.573 | 6.87807 | 11 |
| -2 | 18  | 1  | 109.819 | 6.98853 | 11 |
| 2  | 18  | -1 | 97.1871 | 9.13476 | 10 |
| 1  | 18  | -1 | 32.2422 | 4.70282 | 10 |
| -1 | 18  | -1 | 35.6997 | 3.22657 | 11 |
| -2 | 18  | -1 | 39.5027 | 3.26146 | 9  |
| -2 | 18  | -1 | 38.7323 | 2.63951 | 6  |
| -3 | -18 | -1 | 14.9072 | 3.40055 | 13 |
| -3 | 18  | -1 | 21.8499 | 2.24579 | 9  |
| -3 | 18  | -1 | 21.5411 | 1.49432 | 6  |
| 3  | 18  | 1  | 16.1114 | 4.29753 | 10 |
| -4 | 18  | -1 | 22.7609 | 1.58047 | 6  |
| 4  | 18  | 1  | 19.2101 | 4.70253 | 10 |
| -4 | 18  | -1 | 21.8769 | 1.91982 | 9  |
| -4 | 18  | -1 | 23.6945 | 1.54477 | 6  |
| 5  | 18  | 1  | 18.4052 | 5.02794 | 10 |
| -6 | -18 | -1 | 4.03829 | 3.14053 | 10 |
| -7 | -18 | -1 | 2.37941 | 2.21448 | 10 |
| -7 | -18 | -1 | 4.47610 | 2.65560 | 10 |
| -7 | -19 | 1  | 2.88408 | 2.45250 | 10 |
| 6  | 19  | -1 | 3.24322 | 4.06699 | 10 |
| -5 | 19  | 1  | 66.4423 | 4.18122 | 6  |
| -5 | 19  | 1  | 66.6432 | 4.20042 | 6  |
| -5 | 19  | 1  | 68.7098 | 4.44594 | 9  |
| -4 | -19 | 1  | 134.139 | 11.0573 | 13 |
| -4 | 19  | 1  | 162.800 | 9.18511 | 6  |
| -4 | 19  | 1  | 155.186 | 9.53246 | 9  |
| 4  | 19  | -1 | 134.844 | 12.1578 | 10 |
| -3 | 19  | 1  | 47.8539 | 3.73275 | 9  |
| -3 | 19  | 1  | 49.2031 | 3.27451 | 6  |
| -2 | -19 | 1  | 49.8700 | 5.48051 | 13 |
| -2 | 19  | 1  | 48.5432 | 3.34972 | 11 |
| -2 | 19  | 1  | 45.6020 | 3.47465 | 11 |
| 2  | 19  | -1 | 58.4937 | 6.39478 | 10 |
| -1 | -19 | 1  | 68.4315 | 7.00787 | 13 |
| 1  | 19  | -1 | 73.1734 | 6.82196 | 10 |
| 0  | 19  | 1  | 3.77664 | 2.61343 | 10 |
| 0  | 19  | -1 | 3.74340 | 2.08156 | 11 |
| -1 | -19 | -1 | 144.476 | 10.0847 | 13 |
| 1  | 19  | 1  | 111.777 | 10.0582 | 10 |
| -2 | -19 | -1 | 36.4095 | 5.69305 | 13 |
| -2 | 19  | -1 | 51.2253 | 3.23970 | 6  |
| 2  | 19  | 1  | 50.2702 | 6.36229 | 10 |
| -2 | 19  | -1 | 49.2856 | 3.72670 | 9  |
| -3 | -19 | -1 | 69.1824 | 6.50054 | 13 |
| 3  | 19  | 1  | 65.1270 | 7.48222 | 10 |
| -3 | 19  | -1 | 60.5793 | 4.00843 | 6  |
| -3 | 19  | -1 | 60.1402 | 4.43640 | 9  |
| -4 | -19 | -1 | 46.1476 | 5.17221 | 13 |

|    |     |    |         |         |    |
|----|-----|----|---------|---------|----|
| -4 | 19  | -1 | 47.0446 | 2.93778 | 6  |
| -4 | 19  | -1 | 48.3544 | 3.26500 | 9  |
| 4  | 19  | 1  | 44.0325 | 6.78783 | 10 |
| -4 | 19  | -1 | 44.6401 | 2.94517 | 6  |
| 5  | 19  | 1  | 8.42006 | 4.34388 | 10 |
| -6 | -19 | -1 | 18.2082 | 3.60528 | 10 |
| 6  | 19  | 1  | 15.3126 | 4.18193 | 10 |
| -7 | -19 | -1 | 2.83740 | 2.03852 | 10 |
| -7 | -19 | -1 | 5.14909 | 2.43311 | 10 |
| 6  | 20  | -1 | 2.94201 | 3.47162 | 10 |
| -5 | 20  | 1  | 20.2366 | 1.31265 | 6  |
| 5  | 20  | -1 | 9.97261 | 4.19271 | 10 |
| -5 | 20  | 1  | 19.2040 | 1.31686 | 6  |
| -5 | 20  | 1  | 20.1894 | 1.63595 | 9  |
| -4 | -20 | 1  | 26.0628 | 5.00385 | 13 |
| -4 | 20  | 1  | 33.5856 | 2.78825 | 9  |
| 4  | 20  | -1 | 23.4036 | 5.23953 | 10 |
| -4 | 20  | 1  | 37.0787 | 2.21175 | 6  |
| -3 | -20 | 1  | 164.054 | 11.8622 | 13 |
| -3 | 20  | 1  | 161.880 | 10.6442 | 9  |
| 3  | 20  | -1 | 162.614 | 12.9213 | 10 |
| -3 | 20  | 1  | 171.321 | 10.2483 | 6  |
| -2 | -20 | 1  | 36.0247 | 4.52137 | 13 |
| 2  | 20  | -1 | 23.2407 | 4.39674 | 10 |
| -1 | -20 | 1  | 465.348 | 29.2280 | 13 |
| 1  | 20  | -1 | 458.039 | 29.4047 | 10 |
| -1 | 20  | 1  | 446.305 | 28.2835 | 11 |
| 0  | -20 | -1 | 5.95879 | 2.81809 | 13 |
| 0  | 20  | 1  | 7.01295 | 2.67333 | 10 |
| -1 | -20 | -1 | 32.3589 | 4.66216 | 13 |
| -1 | 20  | -1 | 38.2033 | 2.75406 | 11 |
| -1 | 20  | -1 | 37.0165 | 2.95599 | 11 |
| 1  | 20  | 1  | 30.6336 | 4.88241 | 10 |
| -2 | -20 | -1 | 13.7476 | 2.94759 | 13 |
| -2 | 20  | -1 | 8.10292 | 1.47909 | 9  |
| -2 | 20  | -1 | 8.27468 | 0.98417 | 6  |
| -3 | -20 | -1 | 15.6267 | 2.97091 | 13 |
| -3 | 20  | -1 | 9.20615 | 0.98299 | 6  |
| -3 | 20  | -1 | 7.22463 | 1.36108 | 9  |
| -4 | -20 | -1 | 4.80724 | 3.38481 | 13 |
| -4 | 20  | -1 | 0.50923 | 0.33075 | 6  |
| 4  | 20  | 1  | 2.99539 | 3.70835 | 10 |
| -4 | 20  | -1 | 1.86250 | 0.72378 | 9  |
| -4 | 20  | -1 | 1.06282 | 0.35098 | 6  |
| 5  | 20  | 1  | 1.10761 | 2.61913 | 10 |
| 6  | 20  | 1  | 1.18230 | 2.34215 | 10 |
| 6  | 21  | -1 | 7.05874 | 3.40865 | 10 |
| -5 | 21  | 1  | 8.11654 | 1.00196 | 9  |
| -5 | 21  | 1  | 5.55247 | 0.75035 | 9  |
| 5  | 21  | -1 | 9.59483 | 4.08899 | 10 |



|    |     |    |         |         |    |
|----|-----|----|---------|---------|----|
| -4 | -21 | 1  | 2.74981 | 2.40161 | 13 |
| -4 | 21  | 1  | 3.26412 | 1.04086 | 9  |
| 4  | 21  | -1 | 2.62985 | 3.48932 | 10 |
| -4 | 21  | 1  | 5.04282 | 0.62565 | 6  |
| -3 | -21 | 1  | 56.9350 | 6.24914 | 13 |
| -3 | 21  | 1  | 67.6901 | 4.70829 | 9  |
| -3 | 21  | 1  | 68.1323 | 4.04813 | 6  |
| 3  | 21  | -1 | 46.7589 | 6.81594 | 10 |
| -2 | -21 | 1  | 291.067 | 19.5987 | 13 |
| 2  | 21  | -1 | 296.780 | 20.0094 | 10 |
| -1 | -21 | 1  | 70.9321 | 6.34844 | 13 |
| 1  | 21  | -1 | 57.4743 | 6.00153 | 10 |
| -1 | 21  | 1  | 46.8221 | 4.34536 | 11 |
| 0  | -21 | -1 | 16.1329 | 3.34569 | 13 |
| 0  | 21  | 1  | 12.5874 | 3.01615 | 10 |
| 0  | 21  | -1 | 13.3689 | 2.19469 | 11 |
| -1 | -21 | -1 | 27.7665 | 4.82579 | 13 |
| -1 | 21  | -1 | 41.0891 | 2.70246 | 11 |
| -1 | 21  | -1 | 42.6512 | 2.76470 | 11 |
| -2 | -21 | -1 | 10.1062 | 3.22978 | 13 |
| -2 | 21  | -1 | 14.6439 | 1.93304 | 9  |
| 2  | 21  | 1  | 9.92246 | 3.40991 | 10 |
| -3 | -21 | -1 | 15.9553 | 3.52462 | 13 |
| -3 | 21  | -1 | 9.84563 | 1.04203 | 6  |
| -3 | 21  | -1 | 9.87056 | 1.52457 | 9  |
| 3  | 21  | 1  | 8.52894 | 3.83305 | 10 |
| -4 | 21  | -1 | 3.75680 | 0.84225 | 9  |
| 4  | 21  | 1  | -1.7761 | 3.46292 | 10 |
| -4 | 21  | -1 | 4.13501 | 0.67889 | 9  |
| 5  | 21  | 1  | 10.8599 | 3.10111 | 10 |
| 6  | 21  | 1  | 12.1338 | 2.85905 | 10 |
| 6  | 22  | -1 | 2.35444 | 2.73237 | 10 |
| -5 | 22  | 1  | 6.41484 | 0.70214 | 9  |
| 5  | 22  | -1 | 4.47157 | 3.30153 | 10 |
| -5 | 22  | 1  | 6.14096 | 0.65073 | 9  |
| -4 | -22 | 1  | 40.7497 | 4.66917 | 13 |
| 4  | 22  | -1 | 41.3524 | 5.75172 | 10 |
| -4 | 22  | 1  | 37.7419 | 2.48077 | 6  |
| -4 | 22  | 1  | 34.0360 | 2.75757 | 9  |
| -3 | -22 | 1  | 14.5315 | 3.11103 | 13 |
| -3 | 22  | 1  | 10.9974 | 1.71902 | 9  |
| 3  | 22  | -1 | 14.3696 | 3.64804 | 10 |
| -3 | 22  | 1  | 12.1823 | 1.30362 | 6  |
| 2  | 22  | -1 | 10.8192 | 3.30582 | 10 |
| -1 | -22 | 1  | 112.612 | 9.03936 | 13 |
| -1 | 22  | 1  | 122.172 | 7.81492 | 11 |
| -1 | 22  | 1  | 116.613 | 7.76666 | 11 |
| 1  | 22  | -1 | 118.833 | 9.14819 | 10 |
| 0  | -22 | -1 | 8.86979 | 2.59895 | 13 |
| 0  | 22  | 1  | 10.5039 | 2.41681 | 11 |

|    |     |    |         |         |    |
|----|-----|----|---------|---------|----|
| -1 | -22 | -1 | 2.11215 | 2.27524 | 13 |
| 1  | 22  | 1  | 2.99678 | 2.44406 | 10 |
| -2 | -22 | -1 | 27.4565 | 4.25447 | 13 |
| 2  | 22  | 1  | 33.2056 | 5.21345 | 10 |
| -3 | -22 | -1 | -1.5500 | 2.27582 | 13 |
| -3 | 22  | -1 | -0.7783 | 0.75064 | 9  |
| 3  | 22  | 1  | 2.42973 | 3.11484 | 10 |
| -3 | 22  | -1 | 0.47636 | 0.46715 | 6  |
| 4  | 22  | 1  | 20.9203 | 3.80824 | 10 |
| -4 | 22  | -1 | 22.4331 | 1.59672 | 9  |
| -4 | 22  | -1 | 15.9449 | 1.42499 | 9  |
| 5  | 22  | 1  | 18.0622 | 3.44863 | 10 |
| 5  | 23  | -1 | 34.7488 | 4.93032 | 10 |
| -4 | -23 | 1  | 32.7519 | 4.03926 | 13 |
| -4 | 23  | 1  | 27.2463 | 1.90697 | 6  |
| 4  | 23  | -1 | 32.3921 | 4.91420 | 10 |
| -4 | 23  | 1  | 26.3346 | 1.89528 | 6  |
| -4 | 23  | 1  | 28.6094 | 2.30389 | 9  |
| -3 | -23 | 1  | 4.56116 | 2.42125 | 13 |
| -3 | 23  | 1  | 2.41286 | 1.24025 | 9  |
| 3  | 23  | -1 | 3.45289 | 2.10128 | 10 |
| -3 | 23  | 1  | 2.09428 | 0.65249 | 6  |
| -2 | -23 | 1  | 24.2852 | 4.67309 | 13 |
| 2  | 23  | -1 | 24.6299 | 4.21111 | 10 |
| 1  | -23 | -1 | 22.1057 | 4.06365 | 13 |
| -1 | -23 | 1  | 21.9636 | 3.56222 | 13 |
| 1  | 23  | -1 | 20.7431 | 2.84080 | 11 |
| -1 | 23  | 1  | 25.7152 | 1.98072 | 11 |
| -1 | 23  | 1  | 24.0087 | 1.99403 | 11 |
| 0  | -23 | 1  | 20.4042 | 3.18784 | 13 |
| 0  | -23 | -1 | 13.2716 | 3.44544 | 13 |
| 0  | 23  | -1 | 22.1291 | 2.52738 | 11 |
| 0  | 23  | 1  | 12.5465 | 2.46462 | 11 |
| 0  | 23  | -1 | 18.3707 | 2.04735 | 11 |
| -1 | -23 | -1 | 10.3432 | 2.87697 | 13 |
| 1  | 23  | 1  | 7.41819 | 3.10690 | 10 |
| -2 | -23 | -1 | 14.2813 | 3.03376 | 13 |
| -2 | 23  | -1 | 12.1848 | 1.74335 | 9  |
| 2  | 23  | 1  | 16.1183 | 3.47495 | 10 |
| -3 | -23 | -1 | 8.36221 | 2.62440 | 13 |
| -3 | 23  | -1 | 10.0058 | 0.90796 | 6  |
| 3  | 23  | 1  | 2.23554 | 2.95795 | 10 |
| -3 | 23  | -1 | 7.96746 | 1.26488 | 9  |
| -3 | 23  | -1 | 8.66636 | 0.82350 | 6  |
| 4  | 23  | 1  | 12.3128 | 3.47832 | 10 |
| -4 | 23  | -1 | 10.2230 | 0.87226 | 9  |
| -4 | 23  | -1 | 10.0215 | 0.93386 | 9  |
| 5  | 23  | 1  | 1.36468 | 1.93423 | 10 |
| 5  | 24  | -1 | 5.68754 | 1.96524 | 10 |
| -4 | -24 | 1  | -0.8064 | 1.71908 | 13 |

|    |     |    |         |         |    |
|----|-----|----|---------|---------|----|
| -4 | 24  | 1  | 0.68575 | 0.30045 | 6  |
| -4 | 24  | 1  | 0.44880 | 0.31722 | 6  |
| -4 | 24  | 1  | -0.1682 | 0.69107 | 9  |
| -4 | 24  | 1  | 0.06536 | 0.31261 | 6  |
| 4  | 24  | -1 | -0.7533 | 1.60939 | 10 |
| -3 | -24 | 1  | 14.0081 | 3.01757 | 13 |
| -3 | 24  | 1  | 6.30358 | 0.74267 | 6  |
| 3  | 24  | -1 | 8.24201 | 2.78563 | 10 |
| -3 | 24  | 1  | 5.74011 | 1.18770 | 9  |
| -2 | -24 | 1  | 11.4376 | 2.77763 | 13 |
| 2  | 24  | -1 | 9.70774 | 2.88987 | 10 |
| -1 | -24 | 1  | 17.2998 | 3.14769 | 13 |
| 1  | -24 | -1 | 21.0336 | 3.81830 | 13 |
| 1  | 24  | -1 | 16.1065 | 2.14817 | 11 |
| 0  | -24 | -1 | 17.7562 | 3.03891 | 13 |
| 0  | -24 | 1  | 17.0464 | 3.35608 | 13 |
| 0  | 24  | -1 | 16.1604 | 1.50405 | 11 |
| 0  | 24  | -1 | 13.4292 | 1.46527 | 11 |
| 0  | 24  | 1  | 16.5014 | 2.05678 | 11 |
| -1 | -24 | -1 | 0.43142 | 2.12099 | 13 |
| 1  | 24  | 1  | 0.85859 | 1.90181 | 10 |
| 1  | 24  | 1  | 1.66327 | 1.85473 | 11 |
| -2 | -24 | -1 | 7.05735 | 2.61564 | 13 |
| 2  | 24  | 1  | 4.98528 | 2.61093 | 10 |
| -2 | 24  | -1 | 8.09133 | 1.34951 | 9  |
| -3 | -24 | -1 | 19.1466 | 2.94356 | 13 |
| 3  | 24  | 1  | 14.9055 | 2.77881 | 10 |
| -3 | 24  | -1 | 14.1037 | 1.69363 | 9  |
| 4  | 24  | 1  | 10.6812 | 3.06860 | 10 |
| 5  | 24  | 1  | -0.6086 | 3.21238 | 10 |
| -4 | -25 | 1  | 1.59545 | 2.11469 | 13 |
| 4  | 25  | -1 | 1.29576 | 1.94723 | 10 |
| -4 | 25  | 1  | 2.16311 | 0.53568 | 9  |
| -3 | -25 | 1  | 14.7530 | 2.47176 | 13 |
| 3  | 25  | -1 | 11.5112 | 2.40792 | 10 |
| -3 | 25  | 1  | 9.52090 | 1.01763 | 6  |
| -3 | 25  | 1  | 8.28519 | 1.33160 | 9  |
| -2 | -25 | 1  | 2.23212 | 2.12895 | 13 |
| 2  | 25  | -1 | 0.19905 | 1.42846 | 11 |
| 1  | -25 | -1 | 6.61420 | 2.32624 | 13 |
| 1  | 25  | -1 | 7.66518 | 1.45960 | 11 |
| 0  | -25 | -1 | 8.15969 | 2.62187 | 13 |
| 0  | -25 | 1  | 4.75343 | 2.40362 | 13 |
| 0  | 25  | 1  | 6.34334 | 1.15398 | 11 |
| -1 | -25 | -1 | 0.78878 | 2.12157 | 13 |
| 1  | 25  | 1  | -2.3295 | 1.30737 | 11 |
| -2 | -25 | -1 | 1.91885 | 2.11260 | 13 |
| -2 | 25  | -1 | 0.00606 | 0.93460 | 9  |
| 2  | 25  | 1  | 1.65508 | 1.93246 | 10 |
| -2 | 25  | -1 | 1.04364 | 0.54350 | 6  |

|    |     |    |         |         |    |
|----|-----|----|---------|---------|----|
| -3 | -25 | -1 | 3.61317 | 1.98784 | 13 |
| 3  | 25  | 1  | 1.89810 | 2.24560 | 10 |
| -3 | 25  | -1 | 4.21427 | 0.45294 | 6  |
| -3 | 25  | -1 | 3.81856 | 0.77220 | 9  |
| 4  | 25  | 1  | 13.9072 | 2.70286 | 10 |
| -3 | -26 | 1  | 1.40437 | 1.73567 | 13 |
| 3  | 26  | -1 | 1.66418 | 1.25541 | 11 |
| -2 | -26 | 1  | 8.28242 | 2.16331 | 13 |
| 2  | 26  | -1 | 5.53235 | 1.40318 | 11 |
| -1 | -26 | 1  | 3.60221 | 2.01481 | 13 |
| 1  | -26 | -1 | 5.35428 | 2.05196 | 13 |
| 0  | -26 | -1 | 0.66507 | 2.05880 | 13 |
| 0  | -26 | 1  | -0.4068 | 1.82286 | 13 |
| -1 | -26 | -1 | -0.2312 | 1.88447 | 13 |
| 1  | 26  | 1  | 0.63036 | 1.12711 | 11 |
| 2  | 26  | 1  | 2.35089 | 1.31019 | 11 |
| -2 | 26  | -1 | 1.43133 | 0.85602 | 9  |
| -3 | -26 | -1 | 10.4278 | 2.05987 | 13 |
| 3  | 26  | 1  | 7.82476 | 1.88096 | 10 |
| -2 | -27 | 1  | 7.74014 | 1.91195 | 13 |
| 1  | -27 | -1 | 0.21078 | 1.49222 | 13 |
| -1 | -27 | 1  | 2.92319 | 1.72294 | 13 |
| 0  | -27 | -1 | 30.8000 | 3.75452 | 13 |
| 0  | -27 | 1  | 34.9665 | 3.69601 | 13 |
| -1 | -27 | -1 | 15.0773 | 2.66687 | 13 |
| -2 | -27 | -1 | 1.13770 | 1.51571 | 13 |
| 2  | 27  | 1  | 1.71084 | 0.93129 | 11 |
| 0  | -28 | 1  | 1.16252 | 1.45650 | 13 |
| 0  | -28 | -1 | -0.1542 | 1.67852 | 13 |
| 10 | 0   | -2 | 1.96962 | 2.57103 | 13 |
| 9  | 0   | -2 | 1.93576 | 2.96907 | 13 |
| 8  | 0   | -2 | 10.5659 | 3.71039 | 13 |
| 8  | 0   | -2 | 5.90507 | 3.71258 | 13 |
| -7 | 0   | 2  | 2.57008 | 1.94412 | 10 |
| -6 | 0   | 2  | 1.02814 | 1.59325 | 4  |
| -5 | 0   | 2  | 131.437 | 10.0221 | 1  |
| -5 | 0   | 2  | 139.398 | 9.30402 | 4  |
| -4 | 0   | 2  | 887.984 | 56.8251 | 1  |
| -4 | 0   | 2  | 946.745 | 56.0343 | 4  |
| -4 | 0   | 2  | 906.922 | 55.9707 | 3  |
| -3 | 0   | 2  | 5.23576 | 1.16553 | 4  |
| -3 | 0   | 2  | 5.64345 | 1.30065 | 4  |
| -3 | 0   | 2  | 4.84854 | 1.60734 | 5  |
| -3 | 0   | 2  | 4.18253 | 0.95736 | 3  |
| -3 | 0   | 2  | 5.27219 | 1.45692 | 5  |
| -2 | 0   | 2  | 6242.49 | 380.113 | 3  |
| -2 | 0   | 2  | 6362.25 | 379.257 | 4  |
| -2 | 0   | 2  | 6273.52 | 383.634 | 5  |
| -2 | 0   | 2  | 6168.93 | 379.362 | 4  |
| -1 | 0   | 2  | 54.3614 | 4.28724 | 4  |

|    |    |    |         |         |    |
|----|----|----|---------|---------|----|
| -1 | 0  | 2  | 45.0868 | 4.86745 | 5  |
| 0  | 0  | -2 | 1999.12 | 118.763 | 5  |
| 0  | 0  | -2 | 1962.80 | 117.333 | 4  |
| 0  | 0  | -2 | 1834.08 | 117.715 | 5  |
| -1 | 0  | -2 | 8.64303 | 1.53947 | 5  |
| -1 | 0  | -2 | 6.77835 | 1.40163 | 4  |
| -1 | 0  | -2 | 7.19366 | 1.06115 | 3  |
| -1 | 0  | -2 | 7.51737 | 1.23046 | 4  |
| -1 | 0  | -2 | 7.86198 | 1.22150 | 3  |
| -2 | 0  | -2 | 7069.21 | 425.435 | 2  |
| -2 | 0  | -2 | 7145.17 | 424.546 | 3  |
| -2 | 0  | -2 | 6861.43 | 424.219 | 3  |
| -2 | 0  | -2 | 7161.21 | 424.787 | 4  |
| -2 | 0  | -2 | 6750.77 | 425.153 | 4  |
| -3 | 0  | -2 | 13.7194 | 1.85164 | 4  |
| -3 | 0  | -2 | 8.17474 | 2.50970 | 2  |
| -3 | 0  | -2 | 10.9189 | 1.48349 | 3  |
| -3 | 0  | -2 | 12.0566 | 1.64188 | 4  |
| -4 | 0  | -2 | 59.3245 | 4.69796 | 4  |
| -4 | 0  | -2 | 62.2116 | 4.73920 | 4  |
| -4 | 0  | -2 | 59.8268 | 6.39749 | 2  |
| -4 | 0  | -2 | 58.4696 | 4.61848 | 3  |
| -5 | 0  | -2 | 0.03633 | 1.13397 | 4  |
| -5 | 0  | -2 | 0.50223 | 1.06260 | 3  |
| -6 | 0  | -2 | 169.128 | 11.0611 | 8  |
| -7 | 0  | -2 | 0.21117 | 1.43961 | 8  |
| -8 | 0  | -2 | 1.17975 | 1.31978 | 8  |
| 9  | 0  | 2  | 3.24852 | 2.68209 | 13 |
| 10 | -1 | -2 | 0.62668 | 2.44393 | 13 |
| 10 | 1  | -2 | 2.11785 | 2.63830 | 13 |
| 9  | -1 | -2 | 8.54762 | 3.85467 | 13 |
| -9 | 1  | 2  | 4.09199 | 1.73398 | 7  |
| 9  | 1  | -2 | 1.56111 | 3.30316 | 13 |
| 8  | 1  | -2 | 3.40106 | 2.97847 | 13 |
| -7 | -1 | 2  | 16.3398 | 3.22624 | 10 |
| -7 | 1  | 2  | 12.1710 | 1.81495 | 11 |
| -6 | -1 | 2  | 53.8489 | 5.43333 | 1  |
| -6 | -1 | 2  | 50.0851 | 4.75421 | 4  |
| -6 | 1  | 2  | 57.5851 | 4.71878 | 4  |
| -5 | -1 | 2  | 1149.67 | 68.1848 | 4  |
| -5 | -1 | 2  | 1123.48 | 69.1209 | 1  |
| -5 | 1  | 2  | 1039.17 | 68.2321 | 1  |
| -5 | 1  | 2  | 1125.75 | 67.9469 | 4  |
| -4 | -1 | 2  | 1039.81 | 61.5991 | 4  |
| -4 | -1 | 2  | 1012.63 | 61.7710 | 5  |
| -4 | -1 | 2  | 967.630 | 62.5134 | 1  |
| -4 | -1 | 2  | 1011.87 | 61.6376 | 5  |
| -4 | 1  | 2  | 1034.74 | 61.4248 | 4  |
| -4 | 1  | 2  | 1010.94 | 61.4243 | 3  |
| -4 | 1  | 2  | 953.873 | 62.0340 | 1  |

|    |    |    |         |         |   |
|----|----|----|---------|---------|---|
| -3 | 1  | 2  | 80.5578 | 5.81555 | 4 |
| -3 | 1  | 2  | 81.9261 | 5.57763 | 4 |
| -3 | 1  | 2  | 83.0777 | 5.55343 | 3 |
| -3 | 1  | 2  | 77.2304 | 5.38652 | 5 |
| -3 | 1  | 2  | 83.4418 | 5.51236 | 5 |
| -2 | -1 | 2  | 7588.45 | 425.866 | 4 |
| -2 | -1 | 2  | 6909.93 | 426.252 | 3 |
| -2 | -1 | 2  | 7435.35 | 428.156 | 5 |
| -2 | 1  | 2  | 6858.94 | 428.071 | 5 |
| -2 | 1  | 2  | 6736.25 | 426.350 | 3 |
| -2 | 1  | 2  | 6686.86 | 426.513 | 4 |
| -2 | 1  | 2  | 6977.92 | 426.619 | 4 |
| -1 | -1 | 2  | 1097.81 | 66.8881 | 5 |
| -1 | 1  | 2  | 1107.73 | 66.1049 | 4 |
| -1 | 1  | 2  | 1061.13 | 66.6857 | 5 |
| 0  | -1 | -2 | 2022.52 | 126.692 | 5 |
| 0  | 1  | -2 | 2146.01 | 128.398 | 5 |
| 0  | 1  | -2 | 2238.52 | 128.454 | 5 |
| 0  | 1  | 2  | 1987.24 | 126.922 | 5 |
| 0  | 1  | -2 | 2054.70 | 126.749 | 4 |
| 0  | 1  | -2 | 2052.62 | 126.578 | 4 |
| 0  | 1  | -2 | 2096.80 | 126.306 | 3 |
| -1 | -1 | -2 | 61.3401 | 5.30448 | 5 |
| -1 | -1 | -2 | 68.6261 | 5.18331 | 5 |
| -1 | -1 | -2 | 66.1686 | 4.75070 | 3 |
| -1 | -1 | -2 | 69.9766 | 4.76351 | 4 |
| -1 | -1 | -2 | 69.4654 | 4.89272 | 4 |
| -1 | 1  | -2 | 76.1214 | 4.73997 | 4 |
| -1 | 1  | -2 | 79.7561 | 4.63963 | 3 |
| -1 | 1  | -2 | 76.5124 | 4.58977 | 3 |
| -2 | -1 | -2 | 117.192 | 8.49682 | 2 |
| -2 | -1 | -2 | 100.427 | 7.46538 | 3 |
| -2 | -1 | -2 | 126.522 | 7.62122 | 4 |
| -2 | -1 | -2 | 114.146 | 7.59646 | 3 |
| -2 | 1  | -2 | 122.785 | 7.42197 | 3 |
| -2 | 1  | -2 | 112.887 | 8.29275 | 2 |
| -2 | 1  | -2 | 123.307 | 7.39481 | 4 |
| -2 | 1  | -2 | 108.821 | 7.36713 | 3 |
| -3 | -1 | -2 | 473.795 | 30.0927 | 2 |
| -3 | -1 | -2 | 465.717 | 28.8904 | 3 |
| -3 | -1 | -2 | 479.652 | 28.8969 | 4 |
| -3 | -1 | -2 | 499.201 | 29.0778 | 4 |
| -3 | 1  | -2 | 447.009 | 28.6255 | 4 |
| -3 | 1  | -2 | 465.344 | 28.7286 | 3 |
| -3 | 1  | -2 | 466.575 | 29.9642 | 2 |
| -3 | 1  | -2 | 434.786 | 28.6267 | 4 |
| -3 | 1  | -2 | 481.677 | 28.8115 | 4 |
| -3 | 1  | -2 | 454.550 | 28.7229 | 3 |
| -4 | -1 | -2 | 121.970 | 8.58418 | 3 |
| -4 | -1 | -2 | 129.418 | 8.76472 | 4 |

|    |    |    |         |         |    |
|----|----|----|---------|---------|----|
| -4 | -1 | -2 | 118.180 | 9.09587 | 1  |
| -4 | -1 | -2 | 131.772 | 10.3517 | 2  |
| -4 | 1  | -2 | 128.852 | 8.45703 | 4  |
| -4 | 1  | -2 | 120.106 | 8.21889 | 4  |
| -4 | 1  | -2 | 132.154 | 8.46130 | 3  |
| -5 | 1  | -2 | 7.46069 | 1.56472 | 4  |
| -5 | 1  | -2 | 6.52349 | 1.54432 | 3  |
| -5 | 1  | -2 | 11.2852 | 1.59409 | 4  |
| -6 | -1 | -2 | 29.9270 | 2.96950 | 8  |
| -6 | 1  | -2 | 22.9009 | 2.65682 | 8  |
| -7 | -1 | -2 | 158.303 | 10.6497 | 8  |
| -7 | 1  | -2 | 159.713 | 10.4661 | 8  |
| -8 | -1 | -2 | 9.59905 | 1.70173 | 8  |
| 8  | 1  | 2  | 13.0296 | 3.72283 | 13 |
| -8 | 1  | -2 | 11.6986 | 1.64317 | 8  |
| -9 | -1 | -2 | 33.9103 | 2.66559 | 8  |
| 9  | 1  | 2  | 26.8088 | 5.06736 | 13 |
| 10 | -2 | -2 | -0.7345 | 2.76879 | 13 |
| 10 | 2  | -2 | 7.09272 | 3.38583 | 13 |
| -9 | 2  | 2  | 7.34376 | 1.45552 | 8  |
| -9 | 2  | 2  | 7.40047 | 1.59105 | 7  |
| 9  | 2  | -2 | 3.29803 | 3.46258 | 13 |
| -8 | -2 | 2  | 105.631 | 7.95007 | 10 |
| -8 | 2  | 2  | 109.552 | 7.83458 | 7  |
| 8  | 2  | -2 | 98.3099 | 9.70914 | 13 |
| -7 | -2 | 2  | 3.01634 | 1.84379 | 10 |
| -7 | 2  | 2  | 4.39342 | 1.18872 | 11 |
| -6 | -2 | 2  | 92.6614 | 8.30639 | 1  |
| -6 | 2  | 2  | 100.044 | 7.02814 | 4  |
| -5 | -2 | 2  | 15.6991 | 3.34421 | 1  |
| -5 | 2  | 2  | 10.6138 | 1.83179 | 3  |
| -5 | 2  | 2  | 10.6280 | 1.76057 | 4  |
| -4 | -2 | 2  | 145.900 | 11.9977 | 1  |
| -4 | -2 | 2  | 148.803 | 10.7730 | 4  |
| -4 | -2 | 2  | 149.884 | 11.6067 | 5  |
| -4 | 2  | 2  | 157.715 | 11.0042 | 1  |
| -4 | 2  | 2  | 177.224 | 10.5830 | 3  |
| -4 | 2  | 2  | 179.161 | 10.7810 | 4  |
| -4 | 2  | 2  | 177.119 | 10.5802 | 4  |
| -3 | -2 | 2  | 1757.25 | 112.551 | 4  |
| -3 | -2 | 2  | 1876.67 | 113.719 | 5  |
| -3 | -2 | 2  | 1751.84 | 112.464 | 3  |
| -3 | -2 | 2  | 1891.42 | 113.488 | 2  |
| -3 | 2  | 2  | 1886.40 | 112.364 | 4  |
| -3 | 2  | 2  | 1909.45 | 112.506 | 4  |
| -3 | 2  | 2  | 1886.58 | 112.350 | 3  |
| -2 | -2 | 2  | 596.739 | 38.6826 | 2  |
| -2 | -2 | 2  | 628.963 | 38.2529 | 4  |
| -2 | -2 | 2  | 620.622 | 39.2856 | 5  |
| -2 | 2  | 2  | 632.185 | 38.2341 | 4  |

|    |    |    |         |         |   |
|----|----|----|---------|---------|---|
| -2 | 2  | 2  | 617.714 | 38.0750 | 4 |
| -2 | 2  | 2  | 633.077 | 38.0556 | 3 |
| -2 | 2  | 2  | 630.644 | 38.2849 | 5 |
| -1 | -2 | 2  | 4176.62 | 257.515 | 5 |
| -1 | 2  | 2  | 4235.50 | 257.619 | 3 |
| 1  | 2  | -2 | 4196.63 | 257.446 | 4 |
| -1 | 2  | 2  | 4103.24 | 259.384 | 5 |
| -1 | 2  | 2  | 4342.16 | 257.340 | 4 |
| -1 | 2  | 2  | 4405.96 | 257.618 | 4 |
| 0  | -2 | -2 | 16.9881 | 2.19391 | 5 |
| 0  | 2  | -2 | 12.3653 | 1.47535 | 4 |
| 0  | 2  | -2 | 10.6726 | 1.58321 | 4 |
| 0  | 2  | -2 | 12.1214 | 1.62623 | 5 |
| 0  | 2  | -2 | 12.4877 | 1.55358 | 5 |
| 0  | 2  | -2 | 11.8847 | 1.42707 | 3 |
| -1 | -2 | -2 | 5785.19 | 359.940 | 5 |
| -1 | -2 | -2 | 5931.85 | 357.674 | 4 |
| -1 | -2 | -2 | 5992.45 | 358.818 | 5 |
| -1 | -2 | -2 | 6054.80 | 357.203 | 3 |
| -1 | -2 | -2 | 5822.76 | 358.876 | 2 |
| -1 | 2  | -2 | 5673.61 | 356.849 | 4 |
| 1  | 2  | 2  | 5698.52 | 359.962 | 5 |
| -1 | 2  | -2 | 6134.85 | 356.876 | 3 |
| -1 | 2  | -2 | 5856.27 | 356.509 | 3 |
| -1 | 2  | -2 | 5900.55 | 356.675 | 4 |
| -2 | -2 | -2 | 64.8359 | 4.89230 | 3 |
| -2 | -2 | -2 | 58.3362 | 4.98911 | 4 |
| -2 | -2 | -2 | 57.1041 | 5.31198 | 5 |
| -2 | -2 | -2 | 64.2921 | 5.33817 | 5 |
| -2 | -2 | -2 | 58.6977 | 4.70913 | 4 |
| -2 | -2 | -2 | 56.5824 | 4.65523 | 3 |
| -2 | -2 | -2 | 56.9868 | 5.47034 | 2 |
| -2 | 2  | -2 | 76.2919 | 5.51101 | 2 |
| -2 | 2  | -2 | 79.4924 | 4.42136 | 3 |
| -2 | 2  | -2 | 77.2438 | 4.51098 | 4 |
| -2 | 2  | -2 | 79.4815 | 4.39810 | 3 |
| -3 | -2 | -2 | 443.362 | 29.7026 | 2 |
| -3 | -2 | -2 | 428.738 | 28.4304 | 5 |
| -3 | -2 | -2 | 454.142 | 28.6927 | 4 |
| -3 | -2 | -2 | 449.257 | 28.4435 | 5 |
| -3 | -2 | -2 | 448.537 | 28.5768 | 3 |
| -3 | 2  | -2 | 481.434 | 28.2662 | 3 |
| -3 | 2  | -2 | 469.603 | 28.2546 | 3 |
| -3 | 2  | -2 | 483.291 | 28.1610 | 4 |
| -3 | 2  | -2 | 477.845 | 28.2627 | 4 |
| -4 | -2 | -2 | 129.840 | 9.92673 | 1 |
| -4 | -2 | -2 | 132.289 | 9.25412 | 4 |
| -4 | -2 | -2 | 137.332 | 10.8253 | 2 |
| -4 | 2  | -2 | 127.977 | 8.45376 | 4 |
| -4 | 2  | -2 | 131.921 | 8.57703 | 4 |



|    |    |    |         |         |    |
|----|----|----|---------|---------|----|
| -4 | 2  | -2 | 133.920 | 8.72520 | 3  |
| -5 | -2 | -2 | 632.538 | 41.3478 | 1  |
| -5 | -2 | -2 | 606.158 | 41.0404 | 4  |
| -5 | -2 | -2 | 637.704 | 43.1050 | 2  |
| -5 | 2  | -2 | 722.659 | 40.8578 | 3  |
| -5 | 2  | -2 | 657.050 | 40.1918 | 4  |
| -5 | 2  | -2 | 685.962 | 40.1915 | 4  |
| -6 | -2 | -2 | 63.9103 | 5.30848 | 8  |
| -6 | 2  | -2 | 78.8430 | 5.21717 | 8  |
| -6 | 2  | -2 | 75.6217 | 5.94815 | 3  |
| -7 | -2 | -2 | 3.85149 | 1.83983 | 8  |
| 7  | 2  | 2  | 5.11451 | 3.94439 | 13 |
| -8 | -2 | -2 | 6.96324 | 1.59304 | 8  |
| -8 | 2  | -2 | 4.87152 | 1.27374 | 8  |
| -9 | -2 | -2 | 1.02657 | 1.20311 | 8  |
| 9  | 2  | 2  | 2.24008 | 2.92865 | 13 |
| 10 | 3  | -2 | 23.8576 | 4.19125 | 13 |
| -9 | 3  | 2  | 7.75878 | 1.60999 | 7  |
| -9 | 3  | 2  | 9.39165 | 1.45175 | 8  |
| 9  | 3  | -2 | 2.73604 | 3.60156 | 13 |
| -8 | -3 | 2  | 220.617 | 14.3564 | 10 |
| 8  | 3  | -2 | 216.341 | 15.7288 | 13 |
| -8 | 3  | 2  | 200.209 | 14.0894 | 7  |
| -7 | -3 | 2  | 6.11324 | 2.16838 | 10 |
| -7 | 3  | 2  | 8.41174 | 1.22251 | 11 |
| 7  | 3  | -2 | 2.67487 | 3.77793 | 13 |
| 7  | 3  | -2 | 4.69814 | 3.68129 | 13 |
| -6 | -3 | 2  | 345.724 | 21.9603 | 1  |
| -6 | 3  | 2  | 284.469 | 19.7056 | 4  |
| -5 | -3 | 2  | 101.185 | 7.50788 | 5  |
| -5 | -3 | 2  | 104.494 | 9.18393 | 1  |
| -5 | 3  | 2  | 105.887 | 7.56524 | 4  |
| -5 | 3  | 2  | 105.293 | 7.14885 | 4  |
| -5 | 3  | 2  | 103.085 | 7.18207 | 3  |
| -4 | -3 | 2  | 60.6778 | 6.61534 | 1  |
| -4 | -3 | 2  | 62.4733 | 6.58330 | 5  |
| -4 | -3 | 2  | 63.9896 | 6.80666 | 2  |
| -4 | 3  | 2  | 75.7127 | 5.23038 | 4  |
| -4 | 3  | 2  | 77.0836 | 5.09717 | 4  |
| -4 | 3  | 2  | 78.8017 | 5.04711 | 3  |
| -3 | -3 | 2  | 9.89626 | 2.64282 | 5  |
| -3 | -3 | 2  | 7.74092 | 1.55548 | 4  |
| -3 | -3 | 2  | 7.52662 | 2.15547 | 2  |
| -3 | 3  | 2  | 8.06089 | 1.25838 | 4  |
| -3 | 3  | 2  | 7.61966 | 1.40390 | 4  |
| -2 | -3 | 2  | 1852.51 | 116.770 | 2  |
| -2 | -3 | 2  | 1830.11 | 116.354 | 4  |
| -2 | -3 | 2  | 1871.24 | 117.524 | 5  |
| -2 | 3  | 2  | 1925.90 | 116.195 | 3  |
| -2 | 3  | 2  | 2010.99 | 116.290 | 4  |

|    |    |    |         |         |   |
|----|----|----|---------|---------|---|
| -2 | 3  | 2  | 1922.00 | 116.142 | 4 |
| -2 | 3  | 2  | 2000.63 | 116.141 | 3 |
| 1  | -3 | -2 | 547.601 | 35.6585 | 2 |
| -1 | -3 | 2  | 551.347 | 36.0475 | 5 |
| -1 | 3  | 2  | 603.488 | 35.1649 | 4 |
| -1 | 3  | 2  | 576.181 | 35.2886 | 4 |
| 1  | 3  | -2 | 578.887 | 35.2374 | 4 |
| -1 | 3  | 2  | 573.581 | 35.1268 | 3 |
| -1 | 3  | 2  | 597.083 | 35.5694 | 5 |
| 0  | -3 | -2 | 1197.78 | 67.8254 | 5 |
| 0  | 3  | -2 | 1100.89 | 67.1201 | 4 |
| 0  | 3  | -2 | 1064.71 | 67.1048 | 3 |
| 0  | 3  | -2 | 1074.63 | 67.2375 | 5 |
| 0  | 3  | 2  | 1219.72 | 67.9725 | 5 |
| 0  | 3  | -2 | 963.524 | 67.0360 | 3 |
| 0  | 3  | 2  | 1240.65 | 67.2913 | 4 |
| 0  | 3  | -2 | 1073.01 | 67.0801 | 4 |
| 0  | 3  | -2 | 1018.47 | 67.1466 | 5 |
| -1 | -3 | -2 | 105.223 | 6.52599 | 4 |
| -1 | -3 | -2 | 106.717 | 7.09432 | 5 |
| -1 | -3 | -2 | 107.252 | 7.15556 | 2 |
| -1 | 3  | -2 | 86.8632 | 5.86464 | 3 |
| -1 | 3  | -2 | 88.0395 | 5.93659 | 4 |
| -1 | 3  | -2 | 83.0492 | 5.89572 | 4 |
| -1 | 3  | -2 | 83.7692 | 5.89090 | 3 |
| 1  | 3  | 2  | 106.033 | 7.34247 | 5 |
| -2 | -3 | -2 | 1464.90 | 82.1739 | 5 |
| -2 | -3 | -2 | 1356.36 | 81.4775 | 4 |
| -2 | -3 | -2 | 1407.30 | 82.2139 | 2 |
| -2 | -3 | -2 | 1351.66 | 82.2757 | 5 |
| -2 | 3  | -2 | 1295.70 | 80.8614 | 3 |
| -2 | 3  | -2 | 1271.23 | 80.8025 | 4 |
| -2 | 3  | -2 | 1280.93 | 80.8644 | 3 |
| -2 | 3  | -2 | 1256.59 | 80.8322 | 4 |
| -3 | -3 | -2 | 16.7537 | 2.55340 | 4 |
| -3 | -3 | -2 | 15.1195 | 2.06333 | 3 |
| -3 | -3 | -2 | 20.8768 | 3.15729 | 5 |
| -3 | -3 | -2 | 16.2283 | 3.03347 | 5 |
| -3 | -3 | -2 | 15.2122 | 3.00552 | 1 |
| -3 | -3 | -2 | 15.3663 | 3.00318 | 2 |
| -3 | 3  | -2 | 13.9896 | 1.51377 | 3 |
| -3 | 3  | -2 | 13.9389 | 1.55873 | 3 |
| -3 | 3  | -2 | 18.1459 | 1.43997 | 4 |
| -4 | -3 | -2 | 120.281 | 10.4240 | 2 |
| -4 | -3 | -2 | 121.244 | 9.95441 | 1 |
| -4 | -3 | -2 | 114.771 | 9.07229 | 4 |
| -4 | 3  | -2 | 140.482 | 8.10840 | 4 |
| -4 | 3  | -2 | 143.314 | 8.57465 | 3 |
| -4 | 3  | -2 | 131.805 | 8.09998 | 4 |
| -5 | -3 | -2 | 209.897 | 14.5044 | 4 |

|    |    |    |         |         |    |
|----|----|----|---------|---------|----|
| -5 | -3 | -2 | 219.385 | 15.1421 | 1  |
| -5 | -3 | -2 | 216.066 | 16.3701 | 2  |
| -5 | 3  | -2 | 204.373 | 13.7628 | 3  |
| -6 | -3 | -2 | 84.7958 | 5.63558 | 8  |
| -6 | 3  | -2 | 66.0607 | 4.93217 | 8  |
| -6 | 3  | -2 | 64.3565 | 4.70549 | 9  |
| -7 | -3 | -2 | 84.1531 | 6.80541 | 10 |
| -7 | -3 | -2 | 84.1391 | 6.35116 | 8  |
| -7 | 3  | -2 | 88.4582 | 5.94775 | 8  |
| 7  | 3  | 2  | 82.9324 | 8.26834 | 13 |
| -8 | -3 | -2 | 21.3796 | 2.79350 | 8  |
| 8  | 3  | 2  | 20.8164 | 4.35776 | 13 |
| -9 | 3  | -2 | 19.8284 | 1.72318 | 6  |
| 9  | 3  | 2  | 29.4877 | 5.16973 | 13 |
| -9 | 3  | -2 | 22.5206 | 2.01994 | 9  |
| 10 | 4  | -2 | 20.7883 | 3.55039 | 13 |
| -9 | 4  | 2  | 17.9888 | 2.37783 | 7  |
| -8 | -4 | 2  | 77.8885 | 6.90995 | 10 |
| 8  | 4  | -2 | 76.7274 | 9.19954 | 13 |
| -8 | 4  | 2  | 102.321 | 6.87025 | 7  |
| -7 | -4 | 2  | -0.9221 | 2.09811 | 10 |
| -7 | -4 | 2  | 2.94915 | 2.50329 | 1  |
| 7  | 4  | -2 | 3.47467 | 3.35921 | 13 |
| -7 | 4  | 2  | 1.82981 | 0.80131 | 11 |
| -6 | -4 | 2  | 99.4339 | 10.0024 | 1  |
| -6 | 4  | 2  | 131.331 | 8.35435 | 3  |
| -5 | -4 | 2  | 56.7923 | 6.49502 | 1  |
| -5 | -4 | 2  | 52.9605 | 5.30255 | 5  |
| -5 | 4  | 2  | 45.0452 | 3.71939 | 4  |
| -5 | 4  | 2  | 49.1838 | 3.73969 | 4  |
| -5 | 4  | 2  | 43.9784 | 3.78367 | 3  |
| -4 | 4  | 2  | 22.0891 | 2.16571 | 4  |
| -4 | 4  | 2  | 21.5907 | 2.17826 | 3  |
| -4 | 4  | 2  | 22.2102 | 2.22582 | 4  |
| -3 | -4 | 2  | 873.121 | 52.8134 | 5  |
| -3 | -4 | 2  | 858.316 | 52.0103 | 2  |
| -3 | 4  | 2  | 826.871 | 50.7478 | 3  |
| -3 | 4  | 2  | 798.573 | 50.8377 | 4  |
| -3 | 4  | 2  | 806.583 | 50.7112 | 4  |
| -2 | -4 | 2  | 1704.07 | 108.402 | 5  |
| -2 | -4 | 2  | 1683.30 | 107.578 | 2  |
| -2 | -4 | 2  | 1833.95 | 107.381 | 4  |
| -2 | 4  | 2  | 1802.97 | 106.992 | 3  |
| -2 | 4  | 2  | 1705.74 | 106.888 | 3  |
| -2 | 4  | 2  | 1833.11 | 106.917 | 4  |
| -2 | 4  | 2  | 1781.56 | 107.046 | 4  |
| -1 | -4 | 2  | 387.931 | 25.1217 | 5  |
| 1  | -4 | -2 | 377.676 | 24.8078 | 2  |
| -1 | 4  | 2  | 405.621 | 24.4484 | 5  |
| 1  | 4  | -2 | 408.193 | 24.2460 | 4  |

|    |    |    |         |         |    |
|----|----|----|---------|---------|----|
| -1 | 4  | 2  | 382.752 | 24.1041 | 3  |
| -1 | 4  | 2  | 399.879 | 24.1310 | 4  |
| 1  | 4  | -2 | 387.420 | 24.8493 | 5  |
| -1 | 4  | 2  | 393.071 | 24.2750 | 4  |
| 0  | -4 | -2 | 3017.34 | 196.977 | 2  |
| 0  | -4 | -2 | 2939.10 | 197.043 | 5  |
| 0  | 4  | 2  | 3177.25 | 197.124 | 5  |
| 0  | 4  | 2  | 3180.59 | 196.542 | 4  |
| 0  | 4  | -2 | 3546.29 | 197.197 | 4  |
| 0  | 4  | -2 | 3447.15 | 197.071 | 3  |
| 0  | 4  | -2 | 3414.62 | 196.369 | 4  |
| -1 | 4  | -2 | 38.1278 | 2.53877 | 3  |
| -1 | 4  | -2 | 40.4538 | 2.57663 | 4  |
| -1 | 4  | -2 | 38.3495 | 2.59221 | 3  |
| -1 | 4  | -2 | 40.2181 | 2.58704 | 4  |
| -2 | -4 | -2 | 352.426 | 22.7103 | 3  |
| -2 | -4 | -2 | 360.277 | 22.5200 | 5  |
| -2 | -4 | -2 | 365.458 | 22.4432 | 2  |
| -2 | -4 | -2 | 348.641 | 21.6647 | 4  |
| -2 | 4  | -2 | 325.783 | 20.8644 | 3  |
| -2 | 4  | -2 | 312.178 | 20.8645 | 3  |
| -3 | -4 | -2 | 307.743 | 21.0224 | 2  |
| -3 | -4 | -2 | 297.324 | 20.8953 | 1  |
| -3 | -4 | -2 | 313.339 | 20.6817 | 5  |
| -3 | -4 | -2 | 294.743 | 19.9379 | 4  |
| -3 | 4  | -2 | 321.808 | 19.1670 | 3  |
| -3 | 4  | -2 | 330.493 | 19.1590 | 3  |
| -4 | -4 | -2 | 34.1697 | 3.29729 | 5  |
| -4 | -4 | -2 | 34.7320 | 4.50690 | 1  |
| -4 | -4 | -2 | 34.8513 | 4.92427 | 2  |
| -4 | -4 | -2 | 35.2088 | 3.75445 | 5  |
| -4 | 4  | -2 | 34.4294 | 2.73492 | 3  |
| -5 | -4 | -2 | 790.606 | 51.5629 | 1  |
| -5 | -4 | -2 | 849.722 | 52.9263 | 2  |
| -5 | 4  | -2 | 801.908 | 49.9704 | 3  |
| -6 | 4  | -2 | 10.1160 | 1.02923 | 6  |
| -6 | 4  | -2 | 9.56883 | 1.17568 | 9  |
| -6 | 4  | -2 | 9.98276 | 1.58238 | 8  |
| -7 | -4 | -2 | 501.218 | 28.8461 | 8  |
| -7 | -4 | -2 | 479.222 | 29.0644 | 10 |
| -7 | 4  | -2 | 417.762 | 28.0364 | 9  |
| 7  | 4  | 2  | 461.738 | 29.9728 | 13 |
| -7 | 4  | -2 | 431.043 | 27.8982 | 6  |
| -8 | -4 | -2 | 25.4225 | 2.96346 | 8  |
| -8 | 4  | -2 | 19.9778 | 1.89077 | 9  |
| -8 | 4  | -2 | 19.8079 | 1.76358 | 6  |
| 8  | 4  | 2  | 24.4540 | 4.50726 | 13 |
| -9 | -4 | -2 | 1.93567 | 1.08075 | 8  |
| 9  | 4  | 2  | 0.82866 | 2.84827 | 13 |
| -9 | 4  | -2 | 0.54481 | 0.45549 | 6  |

|    |    |    |         |         |    |
|----|----|----|---------|---------|----|
| -9 | 4  | -2 | 1.11370 | 0.75394 | 9  |
| 10 | 5  | -2 | 5.18380 | 2.79930 | 13 |
| -9 | -5 | 2  | 16.5884 | 3.50473 | 10 |
| -9 | -5 | 2  | 16.9918 | 2.82420 | 8  |
| 9  | 5  | -2 | 13.7912 | 4.14234 | 13 |
| -8 | -5 | 2  | 116.586 | 8.95310 | 10 |
| -8 | 5  | 2  | 112.522 | 8.53794 | 7  |
| 8  | 5  | -2 | 127.296 | 11.1201 | 13 |
| -7 | -5 | 2  | 18.4699 | 3.27998 | 10 |
| -7 | -5 | 2  | 23.7847 | 5.03966 | 1  |
| 7  | 5  | -2 | 25.6578 | 5.02386 | 13 |
| -7 | 5  | 2  | 13.4173 | 2.44425 | 7  |
| -6 | -5 | 2  | 373.863 | 27.1063 | 1  |
| -6 | 5  | 2  | 415.256 | 25.0092 | 3  |
| -5 | -5 | 2  | 162.924 | 13.5796 | 5  |
| -5 | -5 | 2  | 169.970 | 14.2163 | 2  |
| -5 | -5 | 2  | 161.382 | 14.2562 | 1  |
| -5 | 5  | 2  | 207.777 | 11.7030 | 4  |
| -5 | 5  | 2  | 196.817 | 11.7726 | 4  |
| -5 | 5  | 2  | 198.832 | 12.0474 | 3  |
| -4 | -5 | 2  | 238.333 | 17.4784 | 2  |
| -4 | -5 | 2  | 241.227 | 18.0365 | 1  |
| -4 | -5 | 2  | 242.324 | 18.1809 | 5  |
| -4 | 5  | 2  | 258.374 | 15.8226 | 4  |
| -4 | 5  | 2  | 263.777 | 15.6803 | 4  |
| -4 | 5  | 2  | 259.484 | 15.8371 | 3  |
| -3 | 5  | 2  | 64.0591 | 4.54252 | 4  |
| -3 | 5  | 2  | 57.7945 | 4.38731 | 3  |
| -3 | 5  | 2  | 68.4552 | 4.36084 | 4  |
| -3 | 5  | 2  | 61.0160 | 4.31961 | 3  |
| -2 | -5 | 2  | 383.145 | 23.7332 | 5  |
| -2 | -5 | 2  | 381.399 | 22.6627 | 2  |
| -2 | 5  | 2  | 337.901 | 21.7856 | 3  |
| -2 | 5  | 2  | 333.866 | 21.7674 | 4  |
| -2 | 5  | 2  | 334.438 | 21.9079 | 4  |
| -2 | 5  | 2  | 357.205 | 21.8926 | 3  |
| 1  | -5 | -2 | 625.989 | 39.3811 | 2  |
| -1 | -5 | 2  | 647.539 | 40.2531 | 5  |
| -1 | 5  | 2  | 639.735 | 38.6189 | 3  |
| 1  | 5  | -2 | 624.124 | 38.7538 | 4  |
| 1  | 5  | -2 | 639.152 | 38.7257 | 4  |
| -1 | 5  | 2  | 613.609 | 38.6985 | 3  |
| -1 | 5  | 2  | 673.807 | 38.8081 | 4  |
| 1  | 5  | -2 | 592.032 | 39.2437 | 5  |
| -1 | 5  | 2  | 636.203 | 38.6353 | 4  |
| 0  | -5 | -2 | 37.6579 | 4.27369 | 5  |
| 0  | -5 | -2 | 37.8097 | 4.51680 | 2  |
| 0  | 5  | 2  | 41.6247 | 4.11887 | 5  |
| 0  | 5  | -2 | 52.9019 | 3.29632 | 4  |
| 0  | 5  | -2 | 51.7693 | 3.29493 | 4  |

|    |    |    |         |         |    |
|----|----|----|---------|---------|----|
| 0  | 5  | -2 | 55.0322 | 3.28257 | 4  |
| 0  | 5  | 2  | 39.5747 | 3.33889 | 3  |
| 0  | 5  | 2  | 38.7234 | 3.45671 | 4  |
| 0  | 5  | -2 | 53.9655 | 3.23140 | 3  |
| -1 | -5 | -2 | 482.670 | 28.4315 | 5  |
| -1 | -5 | -2 | 479.001 | 28.3086 | 2  |
| 1  | 5  | 2  | 461.344 | 28.4991 | 5  |
| -1 | 5  | -2 | 424.567 | 26.9960 | 3  |
| -1 | 5  | -2 | 425.891 | 26.9683 | 4  |
| -1 | 5  | -2 | 418.569 | 27.0251 | 3  |
| -1 | 5  | -2 | 423.566 | 26.9651 | 4  |
| -2 | -5 | -2 | 186.453 | 12.8848 | 2  |
| -2 | -5 | -2 | 196.842 | 13.2670 | 5  |
| -2 | 5  | -2 | 181.064 | 11.2207 | 3  |
| -2 | 5  | -2 | 174.697 | 11.2248 | 3  |
| -3 | -5 | -2 | 29.9462 | 4.30830 | 5  |
| -3 | -5 | -2 | 31.1505 | 4.58668 | 2  |
| -3 | -5 | -2 | 29.1300 | 4.29951 | 1  |
| -3 | 5  | -2 | 29.5367 | 2.09174 | 3  |
| -3 | 5  | -2 | 27.5632 | 2.09153 | 3  |
| -4 | -5 | -2 | 325.946 | 22.7043 | 2  |
| -4 | -5 | -2 | 304.871 | 22.3114 | 1  |
| -4 | -5 | -2 | 317.561 | 21.6847 | 5  |
| -4 | 5  | -2 | 358.708 | 20.3098 | 3  |
| -5 | -5 | -2 | 143.470 | 10.9128 | 1  |
| -5 | -5 | -2 | 151.063 | 11.8109 | 2  |
| -5 | 5  | -2 | 113.111 | 7.81347 | 6  |
| -5 | 5  | -2 | 115.488 | 8.42480 | 3  |
| -6 | -5 | -2 | 10.2104 | 3.00084 | 1  |
| -6 | -5 | -2 | 9.28236 | 4.09654 | 2  |
| -6 | -5 | -2 | 10.8543 | 2.09724 | 8  |
| -6 | -5 | -2 | 9.27881 | 2.62229 | 10 |
| -6 | 5  | -2 | 7.73079 | 0.89191 | 6  |
| -6 | 5  | -2 | 8.29040 | 1.05152 | 9  |
| -7 | -5 | -2 | 545.050 | 36.2393 | 8  |
| -7 | -5 | -2 | 547.651 | 36.6258 | 10 |
| -7 | 5  | -2 | 637.317 | 35.4417 | 6  |
| 7  | 5  | 2  | 575.419 | 37.7257 | 13 |
| -7 | 5  | -2 | 604.465 | 35.5758 | 9  |
| -8 | -5 | -2 | 4.66127 | 1.82991 | 8  |
| -8 | 5  | -2 | 7.19144 | 1.08502 | 9  |
| -8 | 5  | -2 | 6.04477 | 0.81549 | 6  |
| -8 | 5  | -2 | 6.95866 | 0.97906 | 9  |
| 9  | 5  | 2  | 23.2768 | 3.75281 | 13 |
| -9 | 5  | -2 | 18.6719 | 1.61417 | 9  |
| -9 | 5  | -2 | 16.2742 | 1.36062 | 6  |
| 10 | 6  | -2 | -0.1381 | 2.49390 | 13 |
| -9 | -6 | 2  | 1.73878 | 1.75771 | 8  |
| -9 | -6 | 2  | 1.45450 | 1.74263 | 10 |
| 9  | 6  | -2 | 3.62249 | 3.63327 | 13 |

|    |    |    |         |         |    |
|----|----|----|---------|---------|----|
| -9 | 6  | 2  | 1.26768 | 0.86821 | 9  |
| -9 | 6  | 2  | 2.65363 | 1.68451 | 7  |
| -8 | -6 | 2  | 272.715 | 18.5616 | 10 |
| -8 | 6  | 2  | 286.146 | 18.1654 | 7  |
| 8  | 6  | -2 | 275.280 | 19.5495 | 13 |
| -7 | -6 | 2  | 17.5429 | 4.15975 | 1  |
| -7 | -6 | 2  | 20.7610 | 3.50958 | 10 |
| -7 | 6  | 2  | 18.1934 | 1.95625 | 9  |
| 7  | 6  | -2 | 17.9192 | 4.23044 | 13 |
| -7 | 6  | 2  | 19.9473 | 2.99684 | 7  |
| -6 | 6  | 2  | 9.40783 | 1.19209 | 9  |
| -6 | 6  | 2  | 7.05280 | 1.46931 | 3  |
| -6 | 6  | 2  | 9.55268 | 1.92427 | 7  |
| -5 | -6 | 2  | 34.6389 | 5.38630 | 5  |
| -5 | -6 | 2  | 36.7918 | 5.42088 | 2  |
| -5 | -6 | 2  | 38.0080 | 5.70005 | 1  |
| -4 | -6 | 2  | 48.7122 | 6.46834 | 5  |
| -4 | -6 | 2  | 50.1337 | 6.49292 | 1  |
| -4 | -6 | 2  | 52.6776 | 6.18741 | 2  |
| -4 | 6  | 2  | 65.2045 | 4.36733 | 3  |
| -4 | 6  | 2  | 67.3645 | 4.11252 | 4  |
| -4 | 6  | 2  | 65.1902 | 4.25281 | 4  |
| -3 | -6 | 2  | 77.5230 | 6.67866 | 2  |
| -3 | -6 | 2  | 78.0903 | 8.12960 | 5  |
| -3 | 6  | 2  | 75.1345 | 5.20281 | 4  |
| -3 | 6  | 2  | 79.8546 | 5.44247 | 3  |
| -3 | 6  | 2  | 82.9689 | 5.44434 | 4  |
| -3 | 6  | 2  | 80.9262 | 5.33078 | 3  |
| -2 | -6 | 2  | 475.931 | 28.9265 | 2  |
| -2 | -6 | 2  | 464.383 | 29.9058 | 5  |
| 2  | -6 | -2 | 444.961 | 29.1708 | 2  |
| -2 | 6  | 2  | 418.296 | 28.0901 | 4  |
| -2 | 6  | 2  | 458.055 | 27.9888 | 4  |
| -2 | 6  | 2  | 469.412 | 28.0415 | 3  |
| -2 | 6  | 2  | 465.113 | 28.1405 | 3  |
| 1  | -6 | -2 | 1.76727 | 1.96188 | 2  |
| 1  | 6  | -2 | 4.34696 | 1.52421 | 5  |
| 1  | 6  | -2 | 5.03455 | 1.10784 | 4  |
| -1 | 6  | 2  | 1.55703 | 0.96952 | 4  |
| -1 | 6  | 2  | 1.22711 | 0.69480 | 3  |
| -1 | 6  | 2  | 2.23176 | 0.86458 | 3  |
| 1  | 6  | -2 | 3.74262 | 1.06718 | 4  |
| -1 | 6  | 2  | 2.32020 | 1.01411 | 4  |
| 0  | -6 | -2 | 14.6661 | 2.95277 | 2  |
| 0  | -6 | -2 | 13.9022 | 2.55448 | 5  |
| 0  | 6  | 2  | 17.0302 | 2.30912 | 4  |
| 0  | 6  | 2  | 14.7853 | 1.71144 | 3  |
| 0  | 6  | 2  | 15.5668 | 1.91799 | 4  |
| 1  | 6  | 2  | 12.5283 | 2.85541 | 5  |
| -2 | -6 | -2 | 54.9570 | 5.29952 | 2  |

|    |    |    |         |         |    |
|----|----|----|---------|---------|----|
| -2 | 6  | -2 | 52.9333 | 3.31823 | 3  |
| -2 | 6  | -2 | 52.6848 | 3.30195 | 3  |
| -3 | -6 | -2 | 19.3830 | 3.88049 | 2  |
| -3 | -6 | -2 | 21.1323 | 3.81333 | 5  |
| -3 | -6 | -2 | 22.0570 | 4.56593 | 1  |
| -3 | 6  | -2 | 25.1169 | 1.73381 | 3  |
| -3 | 6  | -2 | 26.3494 | 1.73084 | 3  |
| -4 | -6 | -2 | 79.8759 | 7.88146 | 2  |
| -4 | -6 | -2 | 75.0093 | 7.23724 | 5  |
| -4 | -6 | -2 | 72.6508 | 7.50503 | 1  |
| -4 | 6  | -2 | 86.7978 | 5.27160 | 3  |
| -5 | -6 | -2 | 38.9888 | 6.14046 | 2  |
| -5 | -6 | -2 | 30.7905 | 5.61817 | 1  |
| -5 | 6  | -2 | 39.6932 | 2.50148 | 6  |
| -5 | 6  | -2 | 39.8271 | 3.14351 | 3  |
| -6 | -6 | -2 | 205.787 | 13.8729 | 10 |
| -6 | -6 | -2 | 197.291 | 13.1648 | 8  |
| -6 | -6 | -2 | 201.395 | 15.1177 | 1  |
| -6 | -6 | -2 | 197.915 | 16.9723 | 2  |
| -6 | 6  | -2 | 194.719 | 12.2531 | 9  |
| -6 | 6  | -2 | 202.058 | 12.1574 | 6  |
| -6 | 6  | -2 | 186.898 | 13.1406 | 7  |
| -7 | -6 | -2 | 93.5305 | 7.33330 | 8  |
| -7 | -6 | -2 | 89.4275 | 7.54445 | 10 |
| 7  | 6  | 2  | 91.7001 | 9.25480 | 13 |
| -7 | 6  | -2 | 101.227 | 5.98041 | 6  |
| -7 | 6  | -2 | 94.6223 | 6.13361 | 9  |
| -8 | -6 | -2 | 12.7243 | 2.67111 | 10 |
| -8 | -6 | -2 | 11.7667 | 2.13152 | 8  |
| -8 | 6  | -2 | 6.70496 | 1.01248 | 9  |
| -8 | 6  | -2 | 6.83004 | 0.94764 | 9  |
| -8 | 6  | -2 | 7.41471 | 0.80162 | 6  |
| 8  | 6  | 2  | 13.6826 | 4.00014 | 13 |
| -9 | -6 | -2 | 6.28741 | 1.64417 | 8  |
| 9  | 6  | 2  | 7.76092 | 3.00149 | 13 |
| 10 | 7  | -2 | 16.1377 | 3.01190 | 13 |
| -9 | -7 | 2  | 10.9781 | 2.39453 | 10 |
| -9 | -7 | 2  | 12.5820 | 1.97703 | 8  |
| 9  | 7  | -2 | 20.0267 | 4.20421 | 13 |
| -8 | -7 | 2  | 106.824 | 8.57394 | 10 |
| -8 | 7  | 2  | 94.6191 | 7.31355 | 7  |
| 8  | 7  | -2 | 101.057 | 9.86700 | 13 |
| -8 | 7  | 2  | 96.1285 | 6.46272 | 9  |
| -8 | 7  | 2  | 100.051 | 6.27748 | 6  |
| -7 | 7  | 2  | 49.9927 | 3.51409 | 9  |
| -7 | 7  | 2  | 51.8358 | 4.60395 | 7  |
| -7 | 7  | 2  | 50.1213 | 3.21894 | 6  |
| 7  | 7  | -2 | 32.1494 | 6.49090 | 13 |
| -6 | -7 | 2  | 211.853 | 16.1677 | 1  |
| -6 | 7  | 2  | 188.060 | 11.8867 | 9  |



|    |    |    |         |         |   |
|----|----|----|---------|---------|---|
| -6 | 7  | 2  | 193.643 | 11.7058 | 6 |
| -6 | 7  | 2  | 187.477 | 12.4938 | 3 |
| -6 | 7  | 2  | 175.833 | 12.5857 | 7 |
| -5 | -7 | 2  | 26.0613 | 4.81081 | 2 |
| -5 | -7 | 2  | 34.5897 | 5.37144 | 5 |
| -5 | -7 | 2  | 27.5876 | 5.34573 | 1 |
| -5 | 7  | 2  | 25.8839 | 2.59542 | 3 |
| -4 | -7 | 2  | 108.235 | 9.90440 | 5 |
| -4 | -7 | 2  | 111.225 | 8.96091 | 2 |
| -4 | -7 | 2  | 104.433 | 9.52432 | 1 |
| -4 | 7  | 2  | 103.872 | 6.93300 | 3 |
| -4 | 7  | 2  | 100.909 | 6.56097 | 4 |
| -4 | 7  | 2  | 98.6043 | 6.51453 | 4 |
| -3 | 7  | 2  | 99.4278 | 6.21425 | 3 |
| -3 | 7  | 2  | 90.9677 | 6.04815 | 4 |
| -3 | 7  | 2  | 91.3152 | 6.29942 | 3 |
| -3 | 7  | 2  | 90.8513 | 6.16959 | 4 |
| -2 | -7 | 2  | 222.458 | 16.6646 | 2 |
| 2  | -7 | -2 | 263.661 | 17.2796 | 2 |
| -2 | 7  | 2  | 252.470 | 15.8657 | 4 |
| -2 | 7  | 2  | 264.815 | 16.0529 | 3 |
| -2 | 7  | 2  | 262.426 | 16.0235 | 4 |
| -2 | 7  | 2  | 265.023 | 15.9379 | 3 |
| -1 | -7 | 2  | 375.729 | 22.6849 | 2 |
| 1  | -7 | -2 | 325.667 | 23.1989 | 2 |
| 1  | 7  | -2 | 390.309 | 22.3553 | 4 |
| 1  | 7  | -2 | 398.729 | 22.9064 | 5 |
| -1 | 7  | 2  | 336.971 | 22.1915 | 4 |
| -1 | 7  | 2  | 338.677 | 22.1788 | 3 |
| -1 | 7  | 2  | 324.734 | 22.2770 | 4 |
| -1 | 7  | 2  | 332.378 | 22.2489 | 3 |
| 1  | 7  | -2 | 402.971 | 22.4344 | 4 |
| 0  | -7 | -2 | 92.0932 | 7.30163 | 2 |
| 0  | 7  | 2  | 95.4675 | 6.37658 | 4 |
| 0  | 7  | 2  | 94.1666 | 6.27011 | 3 |
| 0  | 7  | -2 | 94.1204 | 6.04874 | 4 |
| 0  | 7  | -2 | 87.4764 | 6.01753 | 4 |
| 0  | 7  | -2 | 89.0888 | 6.00615 | 3 |
| -1 | -7 | -2 | 347.755 | 23.9462 | 2 |
| -1 | -7 | -2 | 364.363 | 24.6326 | 5 |
| -1 | 7  | -2 | 387.835 | 22.4849 | 4 |
| -1 | 7  | -2 | 364.794 | 22.5783 | 3 |
| -1 | 7  | -2 | 379.215 | 22.4906 | 4 |
| -2 | -7 | -2 | 290.840 | 18.6374 | 5 |
| -2 | -7 | -2 | 288.303 | 18.2344 | 2 |
| -2 | 7  | -2 | 245.235 | 16.1450 | 3 |
| -2 | 7  | -2 | 245.595 | 16.1246 | 3 |
| -3 | -7 | -2 | 217.510 | 15.9060 | 2 |
| -3 | -7 | -2 | 213.121 | 16.0212 | 1 |
| -3 | -7 | -2 | 219.201 | 16.1529 | 5 |

|    |    |    |         |         |    |
|----|----|----|---------|---------|----|
| -3 | 7  | -2 | 222.797 | 13.4119 | 3  |
| -3 | 7  | -2 | 223.862 | 13.4277 | 3  |
| -4 | -7 | -2 | 162.835 | 12.4203 | 5  |
| -4 | -7 | -2 | 159.463 | 12.6652 | 2  |
| -4 | -7 | -2 | 156.328 | 12.4945 | 1  |
| -4 | 7  | -2 | 143.876 | 9.67372 | 3  |
| -5 | -7 | -2 | 16.6567 | 2.58558 | 8  |
| -5 | -7 | -2 | 18.8458 | 4.61626 | 2  |
| -5 | -7 | -2 | 17.7598 | 4.47634 | 1  |
| -5 | 7  | -2 | 16.1886 | 1.17053 | 6  |
| -5 | 7  | -2 | 17.9997 | 2.74677 | 7  |
| -5 | 7  | -2 | 15.2995 | 1.75357 | 3  |
| -5 | 7  | -2 | 14.1933 | 1.09923 | 6  |
| -6 | -7 | -2 | 111.496 | 8.89213 | 10 |
| -6 | -7 | -2 | 107.204 | 11.4024 | 2  |
| -6 | -7 | -2 | 109.451 | 10.0115 | 1  |
| -6 | -7 | -2 | 112.967 | 8.12609 | 8  |
| -6 | 7  | -2 | 114.023 | 7.03240 | 9  |
| -6 | 7  | -2 | 114.019 | 6.91083 | 6  |
| -6 | 7  | -2 | 106.822 | 7.94504 | 7  |
| -7 | -7 | -2 | 101.356 | 8.62894 | 10 |
| -7 | -7 | -2 | 101.230 | 8.39991 | 8  |
| -7 | 7  | -2 | 120.949 | 7.19516 | 9  |
| 7  | 7  | 2  | 108.092 | 10.1871 | 13 |
| -7 | 7  | -2 | 125.687 | 7.04156 | 6  |
| -8 | -7 | -2 | 1.91120 | 1.89768 | 10 |
| -8 | -7 | -2 | 1.98714 | 2.16297 | 10 |
| -8 | -7 | -2 | 2.43305 | 1.69562 | 8  |
| -8 | 7  | -2 | 0.27012 | 0.39681 | 6  |
| 8  | 7  | 2  | 5.24866 | 3.54337 | 13 |
| -8 | 7  | -2 | 0.79015 | 0.73331 | 9  |
| -9 | -7 | -2 | 15.1173 | 2.09419 | 8  |
| -9 | 7  | -2 | 12.3488 | 1.14871 | 9  |
| 9  | 7  | 2  | 16.2675 | 3.31462 | 13 |
| -9 | 7  | -2 | 12.2021 | 1.11841 | 9  |
| -9 | -8 | 2  | 2.82781 | 1.72771 | 8  |
| -9 | -8 | 2  | 2.30785 | 1.93178 | 10 |
| -9 | 8  | 2  | 3.02330 | 0.55297 | 6  |
| -9 | 8  | 2  | 3.49380 | 0.68985 | 9  |
| -9 | 8  | 2  | 3.13463 | 1.30176 | 7  |
| 9  | 8  | -2 | 0.45862 | 3.46836 | 13 |
| -8 | -8 | 2  | 38.4403 | 4.61627 | 10 |
| -8 | 8  | 2  | 28.6906 | 3.74524 | 7  |
| -8 | 8  | 2  | 25.9094 | 2.06427 | 6  |
| -8 | 8  | 2  | 28.7526 | 2.40181 | 9  |
| -7 | -8 | 2  | 7.80186 | 2.72992 | 10 |
| -7 | -8 | 2  | 8.70312 | 4.40774 | 1  |
| -7 | 8  | 2  | 4.36440 | 0.65903 | 6  |
| -7 | 8  | 2  | 2.94574 | 0.91110 | 9  |
| -7 | 8  | 2  | 4.01144 | 1.93914 | 7  |

|    |    |    |         |         |    |
|----|----|----|---------|---------|----|
| 7  | 8  | -2 | 11.6873 | 4.71944 | 13 |
| -6 | -8 | 2  | 131.909 | 11.4437 | 10 |
| -6 | -8 | 2  | 154.055 | 13.5636 | 1  |
| -6 | 8  | 2  | 152.759 | 9.54054 | 9  |
| -6 | 8  | 2  | 157.808 | 10.3774 | 7  |
| -6 | 8  | 2  | 157.667 | 9.35898 | 6  |
| -5 | -8 | 2  | 58.9111 | 7.58398 | 1  |
| -5 | -8 | 2  | 68.9274 | 8.14450 | 5  |
| -5 | -8 | 2  | 62.2441 | 7.48759 | 2  |
| -5 | 8  | 2  | 62.3119 | 4.64802 | 3  |
| -4 | -8 | 2  | 29.9408 | 4.45438 | 2  |
| -4 | -8 | 2  | 30.0721 | 5.35589 | 5  |
| -4 | -8 | 2  | 29.3766 | 5.26840 | 1  |
| -4 | 8  | 2  | 29.3556 | 2.53619 | 3  |
| -3 | -8 | 2  | 211.676 | 14.8258 | 2  |
| -3 | -8 | 2  | 204.282 | 15.7902 | 1  |
| 3  | -8 | -2 | 210.998 | 15.2481 | 2  |
| -3 | 8  | 2  | 216.044 | 13.0893 | 4  |
| -3 | 8  | 2  | 210.271 | 13.1814 | 4  |
| -3 | 8  | 2  | 205.084 | 13.4286 | 3  |
| -3 | 8  | 2  | 215.685 | 13.3099 | 3  |
| 2  | -8 | -2 | 1520.27 | 94.6238 | 2  |
| -2 | -8 | 2  | 1555.08 | 94.3098 | 2  |
| -2 | 8  | 2  | 1523.98 | 93.1916 | 4  |
| -2 | 8  | 2  | 1516.76 | 93.3797 | 3  |
| -2 | 8  | 2  | 1517.59 | 93.2927 | 4  |
| -2 | 8  | 2  | 1576.44 | 93.2787 | 3  |
| 1  | -8 | -2 | 37.6446 | 4.33779 | 2  |
| -1 | -8 | 2  | 34.4323 | 3.53094 | 2  |
| -1 | 8  | 2  | 34.1370 | 2.88019 | 4  |
| -1 | 8  | 2  | 32.3579 | 2.84751 | 3  |
| -1 | 8  | 2  | 31.6378 | 3.09591 | 4  |
| 1  | 8  | -2 | 37.3385 | 3.04227 | 4  |
| 1  | 8  | -2 | 39.1333 | 3.47246 | 5  |
| 0  | -8 | -2 | 805.380 | 53.6523 | 2  |
| 0  | 8  | -2 | 920.055 | 52.5375 | 4  |
| 0  | 8  | -2 | 889.628 | 52.5042 | 4  |
| 0  | 8  | 2  | 848.475 | 52.8068 | 4  |
| 0  | 8  | -2 | 903.583 | 52.5495 | 3  |
| 0  | 8  | 2  | 798.088 | 52.7028 | 3  |
| -1 | 8  | -2 | 21.7414 | 1.80350 | 3  |
| -2 | 8  | -2 | 453.005 | 27.5325 | 3  |
| -3 | -8 | -2 | 203.616 | 15.3185 | 5  |
| -3 | -8 | -2 | 203.762 | 15.0648 | 2  |
| -3 | -8 | -2 | 201.742 | 15.3062 | 1  |
| -4 | -8 | -2 | 137.710 | 11.9257 | 5  |
| -4 | -8 | -2 | 136.249 | 12.1623 | 1  |
| -4 | -8 | -2 | 140.152 | 12.2415 | 2  |
| -4 | 8  | -2 | 151.560 | 8.90055 | 3  |
| -5 | -8 | -2 | 150.225 | 12.9911 | 2  |

|    |    |    |         |         |    |
|----|----|----|---------|---------|----|
| -5 | -8 | -2 | 148.227 | 9.94625 | 8  |
| -5 | -8 | -2 | 147.905 | 12.7624 | 1  |
| -5 | 8  | -2 | 141.933 | 9.11487 | 3  |
| -5 | 8  | -2 | 138.922 | 8.74747 | 6  |
| -5 | 8  | -2 | 146.273 | 8.76329 | 6  |
| -5 | 8  | -2 | 139.375 | 8.82031 | 9  |
| -5 | 8  | -2 | 139.400 | 9.72788 | 7  |
| -6 | -8 | -2 | 6.54743 | 2.40591 | 8  |
| -6 | -8 | -2 | 6.23404 | 3.25473 | 1  |
| -6 | -8 | -2 | 4.08057 | 2.51542 | 10 |
| -6 | 8  | -2 | 2.54908 | 1.78456 | 7  |
| 6  | 8  | 2  | 5.00744 | 3.90862 | 13 |
| -6 | 8  | -2 | 0.33582 | 3.23188 | 12 |
| -6 | 8  | -2 | 4.75004 | 0.68512 | 9  |
| -6 | 8  | -2 | 6.45410 | 0.64468 | 6  |
| -6 | 8  | -2 | 5.40465 | 0.63971 | 6  |
| -7 | -8 | -2 | 125.657 | 9.26693 | 10 |
| -7 | -8 | -2 | 122.991 | 8.67926 | 8  |
| -7 | 8  | -2 | 117.825 | 8.45879 | 7  |
| -7 | 8  | -2 | 116.321 | 7.30042 | 6  |
| 7  | 8  | 2  | 119.835 | 10.5860 | 13 |
| -7 | 8  | -2 | 111.659 | 7.28931 | 6  |
| -7 | 8  | -2 | 116.621 | 7.43196 | 9  |
| -8 | -8 | -2 | 1.30355 | 1.66888 | 10 |
| -8 | -8 | -2 | 2.80740 | 2.01958 | 10 |
| -8 | -8 | -2 | 2.98323 | 1.82837 | 8  |
| -8 | 8  | -2 | 4.49407 | 0.83767 | 9  |
| -8 | 8  | -2 | 4.21291 | 0.49532 | 6  |
| 8  | 8  | 2  | 3.55210 | 3.62390 | 13 |
| -8 | 8  | -2 | 3.59110 | 0.49933 | 6  |
| 9  | 8  | 2  | 17.3877 | 3.36583 | 13 |
| -9 | -9 | 2  | 6.19855 | 1.95617 | 8  |
| -9 | -9 | 2  | 7.53854 | 2.27616 | 10 |
| -9 | 9  | 2  | 9.07134 | 1.10415 | 9  |
| -9 | 9  | 2  | 8.27292 | 0.74374 | 6  |
| 9  | 9  | -2 | 3.39968 | 3.31033 | 13 |
| -9 | 9  | 2  | 6.11985 | 1.83540 | 7  |
| -8 | -9 | 2  | 63.7988 | 6.46506 | 10 |
| -8 | 9  | 2  | 67.1452 | 4.35789 | 6  |
| -8 | 9  | 2  | 68.5275 | 4.55905 | 9  |
| 8  | 9  | -2 | 63.8631 | 7.93123 | 13 |
| -8 | 9  | 2  | 76.5428 | 5.85870 | 7  |
| -7 | -9 | 2  | 39.3816 | 6.75602 | 1  |
| -7 | 9  | 2  | 29.3560 | 2.14255 | 6  |
| 7  | 9  | -2 | 42.7545 | 6.34433 | 13 |
| -7 | 9  | 2  | 28.2882 | 3.68587 | 7  |
| -7 | 9  | 2  | 26.7244 | 2.29086 | 9  |
| -6 | -9 | 2  | 53.9153 | 7.71510 | 2  |
| -6 | -9 | 2  | 52.7930 | 8.64168 | 1  |
| -6 | 9  | 2  | 65.2702 | 4.11022 | 6  |

|    |    |    |         |         |   |
|----|----|----|---------|---------|---|
| -6 | 9  | 2  | 64.4836 | 5.40381 | 7 |
| -6 | 9  | 2  | 71.8631 | 4.37332 | 9 |
| -5 | -9 | 2  | 101.090 | 9.83819 | 2 |
| -5 | -9 | 2  | 101.086 | 10.8119 | 5 |
| -5 | -9 | 2  | 110.508 | 10.7405 | 1 |
| -5 | 9  | 2  | 107.089 | 6.60628 | 6 |
| -5 | 9  | 2  | 110.414 | 7.26651 | 3 |
| -4 | -9 | 2  | 27.7534 | 4.74096 | 2 |
| -4 | -9 | 2  | 27.2963 | 5.32134 | 1 |
| 4  | -9 | -2 | 27.2569 | 4.76420 | 2 |
| -4 | 9  | 2  | 29.7633 | 2.50247 | 3 |
| 3  | -9 | -2 | 39.0406 | 5.13700 | 2 |
| -3 | -9 | 2  | 31.9738 | 4.39879 | 2 |
| -3 | -9 | 2  | 29.8479 | 5.84926 | 1 |
| -3 | 9  | 2  | 40.2296 | 3.20673 | 3 |
| -3 | 9  | 2  | 40.2204 | 2.80028 | 4 |
| -3 | 9  | 2  | 40.7885 | 3.05914 | 3 |
| -3 | 9  | 2  | 39.1526 | 2.71423 | 4 |
| -2 | -9 | 2  | 678.457 | 42.5304 | 2 |
| 2  | -9 | -2 | 655.452 | 42.9356 | 2 |
| -2 | 9  | 2  | 679.288 | 41.3911 | 4 |
| -2 | 9  | 2  | 715.068 | 41.3268 | 4 |
| -2 | 9  | 2  | 647.406 | 41.3821 | 3 |
| 1  | -9 | -2 | 363.056 | 24.9144 | 2 |
| 1  | 9  | -2 | 415.832 | 23.7489 | 4 |
| -1 | 9  | 2  | 351.561 | 23.6040 | 4 |
| 1  | 9  | -2 | 403.450 | 24.0011 | 5 |
| -1 | 9  | 2  | 367.072 | 23.5715 | 4 |
| -1 | 9  | 2  | 371.799 | 23.5908 | 3 |
| 0  | -9 | -2 | 31.5352 | 4.53054 | 2 |
| 0  | 9  | -2 | 41.6414 | 3.04145 | 3 |
| 0  | 9  | -2 | 42.7017 | 3.07316 | 4 |
| 0  | 9  | -2 | 40.5037 | 3.00856 | 4 |
| 0  | 9  | 2  | 28.4598 | 3.20134 | 4 |
| -1 | -9 | -2 | 36.5151 | 5.29006 | 2 |
| -1 | 9  | -2 | 47.5518 | 3.21125 | 3 |
| -1 | 9  | -2 | 45.0943 | 3.04133 | 4 |
| -1 | 9  | -2 | 45.8320 | 3.04579 | 4 |
| -2 | -9 | -2 | 17.5535 | 3.63375 | 2 |
| -2 | -9 | -2 | 18.4681 | 3.74578 | 1 |
| -2 | 9  | -2 | 13.9723 | 1.26132 | 3 |
| -3 | -9 | -2 | 90.1217 | 8.56823 | 2 |
| -3 | -9 | -2 | 93.4338 | 9.27533 | 1 |
| -3 | -9 | -2 | 96.2140 | 8.96444 | 5 |
| -4 | -9 | -2 | 5.69255 | 3.32891 | 5 |
| -4 | -9 | -2 | 4.79594 | 3.50152 | 1 |
| -4 | -9 | -2 | 4.55725 | 2.85907 | 2 |
| -5 | -9 | -2 | 20.5757 | 3.16431 | 8 |
| -5 | -9 | -2 | 20.2571 | 5.26719 | 1 |
| -5 | -9 | -2 | 21.4146 | 5.03419 | 2 |

|    |     |    |         |         |    |
|----|-----|----|---------|---------|----|
| -5 | 9   | -2 | 26.9332 | 1.64546 | 6  |
| -5 | 9   | -2 | 25.0334 | 1.78745 | 3  |
| -5 | 9   | -2 | 24.7099 | 3.34667 | 7  |
| -5 | 9   | -2 | 25.4248 | 1.72440 | 9  |
| -5 | 9   | -2 | 25.1469 | 1.62713 | 6  |
| -5 | 9   | -2 | 25.9412 | 1.79749 | 9  |
| -6 | -9  | -2 | 56.9969 | 4.92196 | 8  |
| -6 | -9  | -2 | 54.7755 | 7.89851 | 1  |
| -6 | -9  | -2 | 63.2004 | 5.92590 | 10 |
| -6 | 9   | -2 | 47.0656 | 3.18566 | 6  |
| -6 | 9   | -2 | 48.5018 | 3.30142 | 9  |
| -6 | 9   | -2 | 46.2074 | 4.52674 | 7  |
| 6  | 9   | 2  | 53.5905 | 8.45527 | 13 |
| -6 | 9   | -2 | 51.5883 | 3.20025 | 6  |
| -6 | 9   | -2 | 44.1326 | 5.30190 | 12 |
| -7 | -9  | -2 | 20.9351 | 4.08662 | 10 |
| -7 | -9  | -2 | 18.4522 | 2.88321 | 8  |
| -7 | 9   | -2 | 19.2580 | 1.59070 | 9  |
| -7 | 9   | -2 | 20.2982 | 1.38255 | 6  |
| 7  | 9   | 2  | 14.3335 | 4.43276 | 13 |
| -7 | 9   | -2 | 20.7865 | 3.05014 | 7  |
| -7 | 9   | -2 | 19.9676 | 1.41068 | 6  |
| -8 | -9  | -2 | 36.8982 | 3.99035 | 10 |
| -8 | -9  | -2 | 36.9213 | 3.98665 | 8  |
| -8 | 9   | -2 | 38.1308 | 2.44339 | 9  |
| -8 | 9   | -2 | 31.6383 | 2.42054 | 9  |
| 8  | 9   | 2  | 30.5983 | 5.06061 | 13 |
| 9  | 9   | 2  | 5.83518 | 2.68983 | 13 |
| -9 | -10 | 2  | 5.73551 | 2.13490 | 10 |
| -9 | -10 | 2  | 4.03740 | 1.76005 | 8  |
| -9 | 10  | 2  | 4.00785 | 0.43723 | 6  |
| -9 | 10  | 2  | 3.65142 | 0.66046 | 9  |
| -9 | 10  | 2  | 3.29517 | 0.43855 | 6  |
| -9 | 10  | 2  | 2.61731 | 1.59429 | 7  |
| 9  | 10  | -2 | 5.01044 | 3.01848 | 13 |
| -8 | -10 | 2  | 4.60544 | 2.27196 | 10 |
| -8 | 10  | 2  | 10.0062 | 1.11235 | 9  |
| 8  | 10  | -2 | 1.26457 | 3.84764 | 13 |
| -8 | 10  | 2  | 12.9464 | 2.42498 | 7  |
| -8 | 10  | 2  | 9.42582 | 0.97031 | 6  |
| -7 | -10 | 2  | 34.7445 | 5.15394 | 10 |
| -7 | -10 | 2  | 37.0065 | 7.29852 | 1  |
| 7  | 10  | -2 | 30.6764 | 5.29645 | 13 |
| -7 | 10  | 2  | 52.2657 | 4.55638 | 7  |
| -7 | 10  | 2  | 45.5794 | 2.87776 | 6  |
| -7 | 10  | 2  | 48.4951 | 3.13438 | 9  |
| 6  | -10 | -2 | 15.5022 | 4.53652 | 2  |
| -6 | -10 | 2  | 27.1094 | 6.37990 | 1  |
| -6 | -10 | 2  | 23.4930 | 5.18416 | 2  |
| -6 | 10  | 2  | 11.9920 | 1.16606 | 6  |

|    |     |    |         |         |    |
|----|-----|----|---------|---------|----|
| -6 | 10  | 2  | 14.9301 | 2.40641 | 7  |
| -6 | 10  | 2  | 12.8282 | 1.49126 | 9  |
| 6  | 10  | -2 | 21.1285 | 5.44083 | 13 |
| -5 | -10 | 2  | 120.562 | 11.3353 | 1  |
| 5  | -10 | -2 | 106.971 | 10.2621 | 2  |
| -5 | -10 | 2  | 118.190 | 10.2790 | 2  |
| -5 | 10  | 2  | 96.4768 | 7.55512 | 7  |
| -5 | 10  | 2  | 102.399 | 7.24926 | 3  |
| -5 | 10  | 2  | 106.194 | 6.61506 | 6  |
| -4 | -10 | 2  | 24.4386 | 4.77153 | 2  |
| -4 | -10 | 2  | 24.3961 | 5.42107 | 1  |
| 4  | -10 | -2 | 35.7581 | 5.34709 | 2  |
| -4 | 10  | 2  | 33.5811 | 2.67052 | 3  |
| 3  | -10 | -2 | 44.1170 | 5.90101 | 2  |
| -3 | -10 | 2  | 35.3241 | 4.70504 | 2  |
| -3 | 10  | 2  | 42.8481 | 3.29943 | 3  |
| -3 | 10  | 2  | 43.6733 | 2.85929 | 4  |
| -3 | 10  | 2  | 40.9797 | 2.89675 | 4  |
| 2  | -10 | -2 | 52.5220 | 6.25682 | 2  |
| -2 | 10  | 2  | 48.9096 | 3.82503 | 3  |
| -2 | 10  | 2  | 52.7137 | 3.79377 | 4  |
| -2 | 10  | 2  | 53.4957 | 3.95301 | 4  |
| 1  | -10 | -2 | 869.449 | 53.6725 | 2  |
| 1  | 10  | -2 | 802.467 | 52.2772 | 4  |
| -1 | 10  | 2  | 895.530 | 52.2437 | 4  |
| -1 | 10  | 2  | 890.628 | 52.2839 | 3  |
| 1  | 10  | -2 | 802.014 | 52.2547 | 5  |
| 0  | -10 | -2 | 145.073 | 11.6389 | 2  |
| 0  | 10  | -2 | 161.942 | 10.1204 | 4  |
| 0  | 10  | -2 | 161.277 | 10.0626 | 4  |
| 0  | 10  | 2  | 152.817 | 10.4156 | 4  |
| -1 | -10 | -2 | 292.715 | 18.0011 | 2  |
| -1 | 10  | -2 | 232.900 | 15.8052 | 3  |
| -1 | 10  | -2 | 252.104 | 15.6231 | 4  |
| -1 | 10  | -2 | 246.192 | 15.5957 | 4  |
| -2 | -10 | -2 | 20.1482 | 4.36624 | 1  |
| -2 | -10 | -2 | 18.5252 | 3.74833 | 2  |
| -2 | 10  | -2 | 29.0915 | 1.96799 | 3  |
| -3 | -10 | -2 | 210.407 | 16.3599 | 1  |
| -3 | -10 | -2 | 213.770 | 16.0300 | 2  |
| -3 | 10  | -2 | 211.900 | 12.9260 | 3  |
| -4 | -10 | -2 | 6.77834 | 3.18255 | 5  |
| -4 | -10 | -2 | 6.16670 | 3.77878 | 2  |
| -4 | -10 | -2 | 7.91493 | 4.04193 | 1  |
| -5 | -10 | -2 | 14.5319 | 4.38555 | 2  |
| -5 | -10 | -2 | 16.6523 | 3.32545 | 10 |
| -5 | -10 | -2 | 13.1055 | 4.34109 | 1  |
| -5 | 10  | -2 | 13.8555 | 0.93372 | 6  |
| -5 | 10  | -2 | 12.5204 | 1.01753 | 9  |
| -5 | 10  | -2 | 12.8687 | 1.09763 | 9  |

|    |     |    |         |         |    |
|----|-----|----|---------|---------|----|
| -5 | 10  | -2 | 13.3561 | 0.91630 | 6  |
| -5 | 10  | -2 | 14.3282 | 2.30157 | 7  |
| -6 | -10 | -2 | 49.7968 | 4.93875 | 8  |
| -6 | -10 | -2 | 56.1730 | 8.29126 | 1  |
| -6 | -10 | -2 | 50.7303 | 5.70753 | 10 |
| -6 | 10  | -2 | 49.9243 | 3.19010 | 9  |
| -6 | 10  | -2 | 48.8102 | 4.56557 | 7  |
| -6 | 10  | -2 | 48.5005 | 3.07684 | 6  |
| -6 | 10  | -2 | 50.1903 | 3.07981 | 6  |
| -6 | 10  | -2 | 43.3705 | 5.27269 | 12 |
| 6  | 10  | 2  | 48.2183 | 6.91290 | 13 |
| -6 | 10  | -2 | 48.3867 | 3.24116 | 9  |
| -7 | -10 | -2 | 25.2962 | 3.76444 | 8  |
| -7 | -10 | -2 | 25.8739 | 5.40294 | 1  |
| -7 | -10 | -2 | 25.4803 | 4.57310 | 10 |
| -7 | 10  | -2 | 25.0251 | 1.88942 | 9  |
| -7 | 10  | -2 | 26.5580 | 1.64606 | 6  |
| -7 | 10  | -2 | 25.4372 | 1.63968 | 6  |
| -7 | 10  | -2 | 21.9387 | 1.86758 | 9  |
| -7 | 10  | -2 | 31.5937 | 3.63003 | 7  |
| -8 | -10 | -2 | 2.78452 | 1.42427 | 8  |
| -8 | -10 | -2 | 3.63074 | 1.97407 | 10 |
| -8 | -10 | -2 | 4.68183 | 2.32713 | 10 |
| 8  | 10  | 2  | 4.20021 | 3.41464 | 13 |
| 9  | 10  | 2  | 7.11209 | 2.46856 | 13 |
| -9 | -11 | 2  | 26.4760 | 3.31317 | 10 |
| -9 | -11 | 2  | 26.4901 | 3.70728 | 8  |
| -9 | 11  | 2  | 20.7667 | 2.79070 | 7  |
| -9 | 11  | 2  | 19.8863 | 1.50791 | 9  |
| 9  | 11  | -2 | 24.2167 | 4.02021 | 13 |
| -9 | 11  | 2  | 19.2777 | 1.55863 | 9  |
| -8 | -11 | 2  | 2.01135 | 2.62646 | 10 |
| -8 | 11  | 2  | 8.14535 | 0.80711 | 6  |
| -8 | 11  | 2  | 8.90557 | 2.22911 | 7  |
| 8  | 11  | -2 | 2.52362 | 4.09483 | 13 |
| -8 | 11  | 2  | 7.95290 | 1.02640 | 9  |
| -7 | -11 | 2  | 7.03205 | 2.93071 | 10 |
| -7 | -11 | 2  | 5.92268 | 4.19827 | 1  |
| 7  | 11  | -2 | 3.92727 | 4.40276 | 13 |
| -7 | 11  | 2  | 7.35149 | 0.78412 | 6  |
| -7 | 11  | 2  | 7.68216 | 0.99421 | 9  |
| -7 | 11  | 2  | 7.32623 | 2.26109 | 7  |
| 6  | -11 | -2 | 24.0943 | 7.46196 | 2  |
| -6 | 11  | 2  | 21.6137 | 1.87741 | 9  |
| -6 | 11  | 2  | 21.3518 | 1.57070 | 6  |
| -6 | 11  | 2  | 24.9265 | 3.24186 | 7  |
| 6  | 11  | -2 | 10.0732 | 4.50586 | 13 |
| -5 | -11 | 2  | 169.187 | 14.9583 | 1  |
| 5  | -11 | -2 | 158.531 | 13.5654 | 2  |
| -5 | -11 | 2  | 164.141 | 13.6423 | 2  |



|    |     |    |         |         |    |
|----|-----|----|---------|---------|----|
| -5 | 11  | 2  | 155.968 | 9.97363 | 9  |
| -5 | 11  | 2  | 158.938 | 9.76430 | 6  |
| -5 | 11  | 2  | 152.668 | 10.7306 | 7  |
| -5 | 11  | 2  | 158.873 | 10.3951 | 3  |
| -4 | -11 | 2  | 15.2186 | 3.77113 | 2  |
| -4 | -11 | 2  | 13.5428 | 4.30673 | 1  |
| -3 | -11 | 2  | 200.495 | 14.8774 | 2  |
| 3  | -11 | -2 | 210.287 | 15.3765 | 2  |
| -3 | 11  | 2  | 205.302 | 13.1257 | 3  |
| -3 | 11  | 2  | 202.967 | 12.5391 | 4  |
| 2  | -11 | -2 | 391.726 | 26.1592 | 2  |
| -2 | 11  | 2  | 388.371 | 23.9334 | 4  |
| -2 | 11  | 2  | 384.058 | 24.1158 | 3  |
| -2 | 11  | 2  | 382.082 | 23.9838 | 4  |
| 1  | -11 | -2 | 39.9533 | 5.23236 | 2  |
| 1  | 11  | -2 | 47.8994 | 3.81019 | 4  |
| -1 | 11  | 2  | 37.5409 | 3.47868 | 4  |
| -1 | 11  | 2  | 39.2651 | 3.41562 | 3  |
| 0  | 11  | -2 | 97.7725 | 6.19549 | 4  |
| 0  | 11  | 2  | 70.2326 | 6.31087 | 4  |
| 0  | 11  | -2 | 96.3581 | 6.12133 | 4  |
| -1 | -11 | -2 | 381.128 | 24.4151 | 2  |
| -1 | 11  | -2 | 356.324 | 21.9749 | 4  |
| -1 | 11  | -2 | 357.546 | 22.0095 | 4  |
| -1 | 11  | -2 | 344.836 | 22.2594 | 3  |
| -2 | -11 | -2 | 10.0272 | 3.47146 | 2  |
| -2 | 11  | -2 | 14.7795 | 1.37941 | 3  |
| -3 | 11  | -2 | 27.5415 | 1.94891 | 3  |
| -3 | 11  | -2 | 28.8904 | 1.93091 | 3  |
| -4 | -11 | -2 | 27.2433 | 5.59586 | 1  |
| -4 | -11 | -2 | 23.4499 | 4.98950 | 2  |
| -4 | 11  | -2 | 27.3024 | 3.05396 | 7  |
| -5 | -11 | -2 | 8.09606 | 3.98424 | 2  |
| -5 | -11 | -2 | 9.93699 | 4.02007 | 1  |
| -5 | -11 | -2 | 8.71743 | 3.49555 | 10 |
| -5 | 11  | -2 | 9.10368 | 2.02489 | 7  |
| -5 | 11  | -2 | 7.37335 | 2.69282 | 12 |
| -5 | 11  | -2 | 7.71536 | 0.75979 | 9  |
| -6 | -11 | -2 | 8.99222 | 3.16290 | 10 |
| -6 | -11 | -2 | 10.3796 | 4.53257 | 1  |
| -6 | 11  | -2 | 19.0811 | 3.60584 | 12 |
| 6  | 11  | 2  | 8.84017 | 4.50494 | 13 |
| -6 | 11  | -2 | 15.2826 | 2.53448 | 7  |
| -6 | 11  | -2 | 15.3960 | 1.19972 | 9  |
| -6 | 11  | -2 | 16.6705 | 1.18254 | 9  |
| -7 | -11 | -2 | 11.1542 | 3.25878 | 10 |
| -7 | -11 | -2 | 11.0370 | 2.52979 | 8  |
| -7 | 11  | -2 | 2.67685 | 2.58263 | 12 |
| -7 | 11  | -2 | 7.86443 | 2.14498 | 7  |
| 7  | 11  | 2  | 10.7466 | 3.79351 | 13 |

|    |     |    |         |         |    |
|----|-----|----|---------|---------|----|
| -8 | -11 | -2 | 0.06412 | 2.15336 | 10 |
| -8 | -11 | -2 | 1.27840 | 1.74480 | 8  |
| -8 | -11 | -2 | 0.51159 | 1.81397 | 10 |
| 8  | 11  | 2  | 1.92043 | 3.08128 | 13 |
| -9 | -12 | 2  | 1.59943 | 1.90106 | 10 |
| -8 | -12 | 2  | 1.30608 | 1.96889 | 10 |
| -8 | 12  | 2  | 0.89109 | 0.55027 | 9  |
| -8 | 12  | 2  | 0.47288 | 0.40384 | 6  |
| -8 | 12  | 2  | 0.60258 | 1.77239 | 7  |
| 8  | 12  | -2 | 0.57291 | 3.12899 | 13 |
| -8 | 12  | 2  | 0.34244 | 0.33452 | 6  |
| -7 | -12 | 2  | 5.02044 | 4.17573 | 1  |
| -7 | -12 | 2  | 5.26739 | 2.89238 | 10 |
| -7 | 12  | 2  | 3.27822 | 0.55834 | 6  |
| 7  | 12  | -2 | 4.07824 | 3.44693 | 13 |
| -7 | 12  | 2  | 3.66111 | 0.74153 | 9  |
| -7 | 12  | 2  | 1.99808 | 1.96660 | 7  |
| -6 | -12 | 2  | 69.6591 | 9.25083 | 1  |
| -6 | -12 | 2  | 62.1526 | 6.37382 | 10 |
| -6 | 12  | 2  | 53.8965 | 3.92573 | 9  |
| -6 | 12  | 2  | 55.8934 | 5.15968 | 7  |
| -6 | 12  | 2  | 55.8412 | 3.72356 | 6  |
| 6  | 12  | -2 | 66.7709 | 7.83917 | 13 |
| 5  | -12 | -2 | 50.7835 | 7.15988 | 2  |
| -5 | -12 | 2  | 48.8453 | 8.67020 | 1  |
| -5 | 12  | 2  | 50.4299 | 4.52336 | 7  |
| -5 | 12  | 2  | 48.3409 | 3.51847 | 9  |
| -5 | 12  | 2  | 53.0561 | 3.27235 | 6  |
| 4  | -12 | -2 | 83.7933 | 8.45776 | 2  |
| -4 | -12 | 2  | 68.8921 | 8.91182 | 1  |
| -4 | 12  | 2  | 80.5009 | 5.55640 | 3  |
| -4 | 12  | 2  | 77.5378 | 4.89743 | 6  |
| 3  | -12 | -2 | 188.895 | 14.5092 | 2  |
| -3 | 12  | 2  | 184.524 | 12.1003 | 3  |
| 2  | -12 | -2 | 252.408 | 18.2936 | 2  |
| -2 | 12  | 2  | 254.599 | 15.9255 | 4  |
| -2 | 12  | 2  | 243.056 | 16.0660 | 3  |
| -2 | 12  | 2  | 258.159 | 15.8610 | 4  |
| 1  | -12 | -2 | 24.8214 | 4.62075 | 2  |
| -1 | 12  | 2  | 24.8012 | 2.71965 | 4  |
| 1  | 12  | -2 | 28.0388 | 2.83348 | 4  |
| -1 | 12  | 2  | 23.4946 | 2.72958 | 3  |
| 0  | -12 | -2 | 436.986 | 28.8835 | 2  |
| 0  | 12  | -2 | 415.977 | 26.8317 | 4  |
| 0  | 12  | 2  | 443.737 | 27.3801 | 4  |
| -1 | 12  | -2 | 20.1726 | 1.69841 | 4  |
| -1 | 12  | -2 | 20.3897 | 1.66288 | 4  |
| -2 | -12 | -2 | 88.5220 | 8.04435 | 2  |
| -2 | 12  | -2 | 74.0879 | 5.24664 | 3  |
| -3 | -12 | -2 | 25.8895 | 5.12084 | 2  |

|    |     |    |         |         |    |
|----|-----|----|---------|---------|----|
| -3 | -12 | -2 | 26.4984 | 5.48827 | 1  |
| -3 | 12  | -2 | 30.0818 | 2.08648 | 3  |
| -3 | 12  | -2 | 28.3724 | 2.04885 | 3  |
| -3 | 12  | -2 | 30.0678 | 1.83797 | 6  |
| -4 | -12 | -2 | 111.339 | 10.7323 | 2  |
| -4 | -12 | -2 | 111.182 | 11.5559 | 1  |
| -4 | 12  | -2 | 102.210 | 7.64763 | 7  |
| -5 | -12 | -2 | 7.17327 | 4.84163 | 1  |
| -5 | -12 | -2 | 5.96223 | 3.88384 | 2  |
| -5 | 12  | -2 | 17.3632 | 3.73620 | 12 |
| -5 | 12  | -2 | 6.86241 | 2.12050 | 7  |
| -6 | -12 | -2 | 28.9192 | 4.78967 | 10 |
| -6 | -12 | -2 | 25.7408 | 5.84645 | 1  |
| 6  | 12  | 2  | 23.9059 | 4.98620 | 13 |
| -6 | 12  | -2 | 21.7384 | 3.48150 | 7  |
| -6 | 12  | -2 | 24.4269 | 3.73290 | 12 |
| -7 | -12 | -2 | 82.6309 | 6.69304 | 8  |
| -7 | -12 | -2 | 82.7186 | 7.46962 | 10 |
| -7 | 12  | -2 | 77.7057 | 6.98490 | 12 |
| 7  | 12  | 2  | 84.0742 | 9.19843 | 13 |
| -8 | -12 | -2 | 29.4992 | 3.76204 | 10 |
| -8 | -12 | -2 | 29.0776 | 3.39810 | 8  |
| -8 | -12 | -2 | 30.0864 | 3.61493 | 10 |
| 8  | 12  | 2  | 24.7396 | 4.03637 | 13 |
| -9 | -13 | 2  | 12.3860 | 2.34995 | 10 |
| -8 | -13 | 2  | 10.7839 | 3.12169 | 10 |
| -8 | 13  | 2  | 5.54232 | 0.51709 | 6  |
| -8 | 13  | 2  | 4.51308 | 0.51681 | 6  |
| -8 | 13  | 2  | 6.69573 | 0.84392 | 9  |
| -8 | 13  | 2  | 5.53458 | 0.78404 | 9  |
| -8 | 13  | 2  | 3.64593 | 1.91174 | 7  |
| -7 | -13 | 2  | 25.4517 | 4.40130 | 10 |
| -7 | -13 | 2  | 26.3313 | 5.90655 | 1  |
| -7 | 13  | 2  | 28.0231 | 2.10549 | 9  |
| -7 | 13  | 2  | 28.2075 | 1.89612 | 6  |
| -7 | 13  | 2  | 29.0190 | 1.95440 | 6  |
| -7 | 13  | 2  | 28.8961 | 3.86019 | 7  |
| -6 | -13 | 2  | 1.77760 | 2.67159 | 10 |
| -6 | -13 | 2  | 2.96875 | 4.38917 | 1  |
| -6 | 13  | 2  | 3.07444 | 0.55661 | 6  |
| -6 | 13  | 2  | 2.39292 | 1.98416 | 7  |
| -6 | 13  | 2  | 3.52396 | 0.78026 | 9  |
| 5  | -13 | -2 | 9.09157 | 3.68764 | 2  |
| -5 | -13 | 2  | 14.0386 | 5.65515 | 1  |
| -5 | 13  | 2  | 8.28562 | 1.18040 | 9  |
| -5 | 13  | 2  | 10.7519 | 0.97259 | 6  |
| -5 | 13  | 2  | 12.0719 | 2.51898 | 7  |
| 4  | -13 | -2 | 6.06126 | 3.23913 | 2  |
| -4 | 13  | 2  | 5.91408 | 1.78471 | 7  |
| -4 | 13  | 2  | 6.44880 | 0.72802 | 6  |

|    |     |    |         |         |    |
|----|-----|----|---------|---------|----|
| -4 | 13  | 2  | 6.97745 | 1.29858 | 3  |
| 3  | -13 | -2 | 1.29561 | 2.63108 | 2  |
| -3 | 13  | 2  | 1.76329 | 1.02815 | 3  |
| 2  | -13 | -2 | 365.361 | 24.9846 | 2  |
| -2 | 13  | 2  | 359.149 | 22.8106 | 3  |
| -2 | 13  | 2  | 364.918 | 22.4753 | 4  |
| -2 | 13  | 2  | 357.296 | 22.5227 | 4  |
| 1  | -13 | -2 | 304.754 | 22.3234 | 2  |
| -1 | 13  | 2  | 310.622 | 20.2666 | 4  |
| 1  | 13  | -2 | 343.369 | 20.5623 | 4  |
| 0  | -13 | -2 | 83.8801 | 8.30627 | 2  |
| 0  | 13  | -2 | 83.8443 | 5.96941 | 4  |
| -1 | -13 | -2 | 162.324 | 13.1831 | 2  |
| -1 | 13  | -2 | 163.621 | 10.2895 | 4  |
| -1 | 13  | -2 | 168.576 | 10.2862 | 4  |
| -2 | -13 | -2 | 222.059 | 17.3765 | 2  |
| -2 | 13  | -2 | 231.074 | 14.5799 | 3  |
| -2 | 13  | -2 | 239.775 | 14.6530 | 3  |
| -3 | -13 | -2 | 120.162 | 10.6439 | 2  |
| -3 | -13 | -2 | 122.893 | 11.7515 | 1  |
| -3 | 13  | -2 | 105.066 | 6.58558 | 6  |
| -3 | 13  | -2 | 107.686 | 6.87934 | 3  |
| -3 | 13  | -2 | 98.9920 | 6.81100 | 3  |
| -4 | -13 | -2 | 17.7669 | 5.19135 | 1  |
| -4 | -13 | -2 | 22.2597 | 5.16251 | 2  |
| -4 | 13  | -2 | 22.0787 | 2.98152 | 7  |
| -4 | 13  | -2 | 20.6325 | 1.43617 | 9  |
| -4 | 13  | -2 | 22.0050 | 1.32884 | 6  |
| -4 | 13  | -2 | 20.7505 | 1.33669 | 6  |
| -4 | 13  | -2 | 21.5857 | 1.38251 | 9  |
| -5 | -13 | -2 | 11.1411 | 4.58546 | 1  |
| -5 | -13 | -2 | 9.10740 | 3.31185 | 10 |
| 5  | 13  | 2  | 13.4778 | 4.32021 | 13 |
| -5 | 13  | -2 | 15.5202 | 3.18891 | 12 |
| -6 | -13 | -2 | 304.275 | 23.4005 | 1  |
| -6 | -13 | -2 | 310.288 | 20.8799 | 10 |
| 6  | 13  | 2  | 293.781 | 20.6928 | 13 |
| -6 | 13  | -2 | 313.904 | 20.2113 | 12 |
| -7 | -13 | -2 | 6.79410 | 3.01223 | 10 |
| 7  | 13  | 2  | 5.88649 | 3.26710 | 13 |
| -7 | 13  | -2 | 0.10602 | 2.45496 | 12 |
| -8 | -13 | -2 | 5.49393 | 2.07524 | 10 |
| -8 | -13 | -2 | 5.12916 | 2.41693 | 10 |
| 8  | 13  | 2  | 6.52515 | 2.66913 | 13 |
| -8 | -14 | 2  | 1.45014 | 1.82609 | 10 |
| -8 | 14  | 2  | 3.01966 | 0.39652 | 9  |
| -8 | 14  | 2  | 1.78950 | 1.29795 | 7  |
| -7 | -14 | 2  | 72.7809 | 6.29657 | 10 |
| -7 | 14  | 2  | 61.4833 | 3.99206 | 9  |
| -7 | 14  | 2  | 56.8655 | 3.81712 | 6  |

|    |     |    |         |         |    |
|----|-----|----|---------|---------|----|
| -7 | 14  | 2  | 59.8098 | 3.81813 | 6  |
| -7 | 14  | 2  | 58.6848 | 5.37357 | 7  |
| -6 | -14 | 2  | 97.2328 | 11.6748 | 1  |
| -6 | -14 | 2  | 98.1231 | 8.58389 | 10 |
| -6 | 14  | 2  | 90.3049 | 6.01968 | 9  |
| -6 | 14  | 2  | 92.6951 | 7.22412 | 7  |
| -6 | 14  | 2  | 93.4209 | 5.83820 | 6  |
| 5  | -14 | -2 | 9.35800 | 4.39916 | 2  |
| -5 | -14 | 2  | 6.21538 | 4.30782 | 1  |
| -5 | 14  | 2  | 4.93238 | 0.99107 | 9  |
| 5  | 14  | -2 | 0.84116 | 3.96449 | 10 |
| -5 | 14  | 2  | 4.42724 | 0.64467 | 6  |
| -5 | 14  | 2  | 3.34850 | 1.92296 | 7  |
| 4  | -14 | -2 | 19.8953 | 4.61168 | 2  |
| -4 | 14  | 2  | 20.9542 | 2.44116 | 3  |
| -4 | 14  | 2  | 24.0110 | 2.95980 | 7  |
| -4 | 14  | 2  | 23.2081 | 1.64695 | 6  |
| -4 | 14  | 2  | 21.5595 | 2.10172 | 9  |
| 3  | -14 | -2 | 35.1788 | 6.41816 | 2  |
| -3 | 14  | 2  | 33.7442 | 2.36352 | 6  |
| -3 | 14  | 2  | 34.8077 | 3.21590 | 3  |
| 2  | -14 | -2 | 21.6836 | 4.41840 | 2  |
| -2 | 14  | 2  | 21.1813 | 2.58913 | 3  |
| -2 | 14  | 2  | 22.1114 | 2.31685 | 4  |
| -2 | 14  | 2  | 22.4256 | 2.28816 | 4  |
| 1  | -14 | -2 | 99.9169 | 9.51415 | 2  |
| -1 | 14  | 2  | 92.7999 | 6.78508 | 4  |
| 0  | -14 | -2 | 0.14525 | 3.12706 | 2  |
| 0  | 14  | -2 | 3.80167 | 1.24584 | 3  |
| 0  | 14  | -2 | 4.11571 | 1.29776 | 4  |
| -1 | -14 | -2 | 9.68454 | 3.23852 | 2  |
| -1 | 14  | -2 | 11.1991 | 1.71280 | 3  |
| -1 | 14  | -2 | 9.80860 | 1.07060 | 4  |
| -1 | 14  | -2 | 10.7591 | 1.04419 | 4  |
| -2 | -14 | -2 | 28.1651 | 5.73419 | 2  |
| -2 | 14  | -2 | 32.6662 | 2.95506 | 3  |
| -2 | 14  | -2 | 38.2450 | 2.31723 | 6  |
| -3 | 14  | -2 | 61.3398 | 4.09361 | 9  |
| -3 | 14  | -2 | 67.4896 | 3.94650 | 6  |
| -3 | 14  | -2 | 60.3059 | 4.23369 | 3  |
| -3 | 14  | -2 | 65.1605 | 4.31847 | 3  |
| -4 | -14 | -2 | 0.18655 | 4.19587 | 1  |
| -4 | -14 | -2 | 0.76689 | 3.04423 | 2  |
| -4 | 14  | -2 | 5.69026 | 0.47430 | 6  |
| -4 | 14  | -2 | 5.25824 | 0.44980 | 6  |
| -4 | 14  | -2 | 14.9977 | 3.37119 | 12 |
| -4 | 14  | -2 | 5.18598 | 0.70220 | 9  |
| -4 | 14  | -2 | 5.95790 | 0.58820 | 9  |
| -5 | -14 | -2 | 55.3077 | 6.36234 | 10 |
| -5 | -14 | -2 | 54.9377 | 8.50865 | 1  |

|    |     |    |         |         |    |
|----|-----|----|---------|---------|----|
| -5 | 14  | -2 | 48.7406 | 5.78343 | 12 |
| -6 | -14 | -2 | 6.88850 | 5.19474 | 1  |
| -6 | -14 | -2 | 5.58068 | 3.29142 | 10 |
| -6 | 14  | -2 | 2.75848 | 3.07723 | 12 |
| -7 | -14 | -2 | 30.8665 | 4.78672 | 10 |
| -8 | -14 | -2 | 5.59616 | 1.62362 | 10 |
| -8 | -15 | 2  | 5.87095 | 2.13134 | 10 |
| -7 | -15 | 2  | 46.6124 | 5.70157 | 10 |
| -7 | 15  | 2  | 42.1110 | 4.35175 | 7  |
| -7 | 15  | 2  | 38.6582 | 2.55059 | 6  |
| -7 | 15  | 2  | 38.5419 | 2.55766 | 6  |
| -7 | 15  | 2  | 42.3303 | 2.72585 | 9  |
| -6 | -15 | 2  | 34.1314 | 5.12813 | 10 |
| -6 | -15 | 2  | 39.2127 | 8.04962 | 1  |
| -6 | 15  | 2  | 23.2851 | 1.90385 | 9  |
| -6 | 15  | 2  | 23.1347 | 3.55107 | 7  |
| -6 | 15  | 2  | 20.0141 | 1.61892 | 6  |
| -6 | 15  | 2  | 22.0054 | 1.64824 | 6  |
| -5 | -15 | 2  | 8.25523 | 5.03271 | 1  |
| 5  | 15  | -2 | 8.43983 | 3.06591 | 10 |
| -5 | 15  | 2  | 11.0655 | 1.08350 | 6  |
| -5 | 15  | 2  | 8.68276 | 2.15437 | 7  |
| -5 | 15  | 2  | 10.3840 | 1.25829 | 9  |
| 4  | -15 | -2 | 8.60551 | 4.36866 | 2  |
| -4 | 15  | 2  | 14.6304 | 1.18589 | 6  |
| 4  | 15  | -2 | 10.4637 | 4.22600 | 10 |
| -4 | 15  | 2  | 15.9473 | 2.40416 | 7  |
| 3  | -15 | -2 | 35.4729 | 6.60965 | 2  |
| -3 | 15  | 2  | 30.6212 | 3.33162 | 7  |
| -3 | 15  | 2  | 31.9712 | 3.17784 | 3  |
| -3 | 15  | 2  | 34.3544 | 2.31581 | 6  |
| 2  | -15 | -2 | 24.9999 | 5.25358 | 2  |
| -2 | 15  | 2  | 24.4707 | 2.35615 | 4  |
| -2 | 15  | 2  | 26.4695 | 2.40538 | 4  |
| -2 | 15  | 2  | 23.9810 | 2.87709 | 3  |
| 1  | -15 | -2 | 15.2346 | 4.48047 | 2  |
| -1 | 15  | 2  | 14.7317 | 2.28873 | 4  |
| 0  | -15 | -2 | 24.6887 | 4.79886 | 2  |
| 0  | 15  | -2 | 24.4808 | 2.67009 | 4  |
| -1 | -15 | -2 | 9.34912 | 3.85920 | 2  |
| -1 | 15  | -2 | 15.8865 | 2.08619 | 3  |
| -2 | -15 | -2 | 498.484 | 33.4763 | 2  |
| -2 | 15  | -2 | 487.104 | 29.6121 | 6  |
| -2 | 15  | -2 | 479.587 | 30.2724 | 3  |
| -3 | -15 | -2 | 15.8623 | 4.31884 | 2  |
| -3 | 15  | -2 | 6.13974 | 0.64256 | 6  |
| -3 | 15  | -2 | 4.71142 | 0.84511 | 3  |
| -3 | 15  | -2 | 6.24095 | 0.84955 | 9  |
| -4 | 15  | -2 | 27.7162 | 1.70531 | 6  |
| -4 | 15  | -2 | 27.3932 | 1.92167 | 9  |

|    |     |    |         |         |    |
|----|-----|----|---------|---------|----|
| -4 | 15  | -2 | 24.6200 | 1.78626 | 9  |
| -4 | 15  | -2 | 26.8198 | 1.68307 | 6  |
| -4 | 15  | -2 | 25.2644 | 4.46020 | 12 |
| -5 | -15 | -2 | 50.0509 | 6.17188 | 10 |
| -5 | -15 | -2 | 46.0061 | 8.34359 | 1  |
| -5 | 15  | -2 | 51.6181 | 6.36916 | 12 |
| -6 | -15 | -2 | 8.49035 | 3.35780 | 10 |
| -6 | 15  | -2 | 18.1113 | 3.56725 | 12 |
| -7 | -15 | -2 | 9.46678 | 3.14671 | 10 |
| -8 | -15 | -2 | 7.12081 | 1.97877 | 10 |
| -8 | -16 | 2  | 25.5588 | 3.97086 | 10 |
| -7 | -16 | 2  | 3.89746 | 3.11311 | 10 |
| -7 | 16  | 2  | 2.94459 | 0.49885 | 9  |
| -7 | 16  | 2  | 1.08827 | 1.96368 | 7  |
| -7 | 16  | 2  | 2.74755 | 0.47286 | 9  |
| -6 | -16 | 2  | 90.0003 | 11.5555 | 1  |
| -6 | -16 | 2  | 92.9367 | 9.75200 | 10 |
| -6 | 16  | 2  | 98.4002 | 5.99460 | 6  |
| -6 | 16  | 2  | 101.737 | 7.49514 | 7  |
| -6 | 16  | 2  | 97.3716 | 5.99606 | 6  |
| 6  | 16  | -2 | 78.8889 | 12.7537 | 10 |
| -6 | 16  | 2  | 100.166 | 6.19609 | 9  |
| -5 | -16 | 2  | 15.5585 | 5.62417 | 1  |
| -5 | 16  | 2  | 7.16238 | 0.79399 | 6  |
| -5 | 16  | 2  | 6.60713 | 1.09881 | 9  |
| -5 | 16  | 2  | 7.12964 | 2.12787 | 7  |
| 5  | 16  | -2 | 14.7764 | 4.20570 | 10 |
| -4 | -16 | 2  | 4.87204 | 2.97223 | 13 |
| 4  | 16  | -2 | 3.63625 | 3.64132 | 10 |
| -4 | 16  | 2  | 10.7670 | 2.19420 | 7  |
| -4 | 16  | 2  | 9.32651 | 1.39114 | 9  |
| -4 | 16  | 2  | 9.54549 | 0.93873 | 6  |
| 3  | -16 | -2 | 85.2995 | 9.57682 | 2  |
| 3  | 16  | -2 | 91.9374 | 8.19535 | 10 |
| -3 | 16  | 2  | 74.0923 | 6.13152 | 3  |
| -3 | 16  | 2  | 80.6307 | 5.59181 | 9  |
| 2  | -16 | -2 | 88.3934 | 9.26543 | 2  |
| -2 | 16  | 2  | 87.1667 | 5.93649 | 4  |
| 1  | -16 | -2 | 28.0655 | 5.78200 | 2  |
| -1 | 16  | 2  | 30.6963 | 3.20268 | 4  |
| 0  | -16 | -2 | 36.0470 | 5.87062 | 2  |
| 0  | 16  | -2 | 35.9027 | 3.32334 | 4  |
| -1 | -16 | -2 | 136.885 | 12.2636 | 2  |
| -1 | 16  | -2 | 135.610 | 9.41362 | 3  |
| -2 | -16 | -2 | 86.5089 | 9.82675 | 2  |
| -2 | 16  | -2 | 108.503 | 6.92616 | 9  |
| -2 | 16  | -2 | 108.761 | 7.31822 | 3  |
| -2 | 16  | -2 | 110.150 | 6.56419 | 6  |
| -3 | -16 | -2 | 2.80544 | 3.12046 | 2  |
| -3 | 16  | -2 | 2.05662 | 0.82214 | 9  |

|    |     |    |         |         |    |
|----|-----|----|---------|---------|----|
| 3  | 16  | 2  | 3.01393 | 3.55465 | 10 |
| -3 | 16  | -2 | 4.35491 | 3.26677 | 12 |
| -3 | 16  | -2 | 1.95491 | 0.48697 | 6  |
| -3 | 16  | -2 | 2.49406 | 0.43831 | 6  |
| -4 | -16 | -2 | 9.64683 | 4.81750 | 1  |
| -4 | 16  | -2 | 9.41970 | 0.76435 | 6  |
| -4 | 16  | -2 | 10.5803 | 1.08084 | 9  |
| -4 | 16  | -2 | 10.1019 | 0.89013 | 9  |
| -4 | 16  | -2 | 9.73082 | 3.07773 | 12 |
| 4  | 16  | 2  | 7.23063 | 3.98488 | 10 |
| -5 | -16 | -2 | 39.3266 | 7.81263 | 1  |
| -5 | -16 | -2 | 34.1332 | 5.67956 | 10 |
| -5 | 16  | -2 | 48.1092 | 6.18433 | 12 |
| -6 | -16 | -2 | 22.1231 | 4.34536 | 10 |
| -6 | 16  | -2 | 20.3210 | 3.82461 | 12 |
| -7 | -16 | -2 | 12.6296 | 3.36216 | 10 |
| -7 | -16 | -2 | 12.6236 | 3.07552 | 10 |
| -8 | -17 | 2  | 7.48010 | 2.50207 | 10 |
| -7 | -17 | 2  | -1.4498 | 2.59583 | 10 |
| 6  | 17  | -2 | 10.7051 | 4.48627 | 10 |
| -6 | 17  | 2  | 13.9730 | 1.10429 | 6  |
| -6 | 17  | 2  | 15.7633 | 1.12514 | 6  |
| -6 | 17  | 2  | 15.4957 | 1.46435 | 9  |
| -5 | 17  | 2  | 33.9327 | 2.70687 | 9  |
| -5 | 17  | 2  | 34.3491 | 2.33169 | 6  |
| 5  | 17  | -2 | 35.1149 | 6.13092 | 10 |
| -4 | -17 | 2  | 70.1782 | 6.69407 | 13 |
| 4  | 17  | -2 | 75.5982 | 7.83128 | 10 |
| -4 | 17  | 2  | 69.1883 | 4.54591 | 6  |
| -4 | 17  | 2  | 70.1970 | 4.89926 | 9  |
| -3 | -17 | 2  | 42.1857 | 6.40875 | 13 |
| -3 | 17  | 2  | 31.1589 | 3.20137 | 9  |
| 3  | 17  | -2 | 46.3881 | 5.90093 | 10 |
| 2  | -17 | -2 | 28.4842 | 6.01970 | 2  |
| 2  | 17  | -2 | 27.4476 | 5.39693 | 10 |
| 1  | -17 | -2 | 3.44614 | 3.83944 | 2  |
| 0  | -17 | -2 | 14.4488 | 4.05193 | 2  |
| -1 | -17 | -2 | 69.1496 | 8.35940 | 2  |
| -1 | 17  | -2 | 60.4122 | 5.18970 | 3  |
| -2 | -17 | -2 | 17.3081 | 4.95321 | 2  |
| -2 | 17  | -2 | 17.1389 | 1.40614 | 6  |
| -2 | 17  | -2 | 15.1018 | 1.78567 | 9  |
| 2  | 17  | 2  | 27.8564 | 5.38599 | 10 |
| -3 | -17 | -2 | 91.0774 | 7.07107 | 13 |
| -3 | 17  | -2 | 83.2162 | 5.28282 | 6  |
| -3 | 17  | -2 | 79.1534 | 5.52564 | 9  |
| 3  | 17  | 2  | 102.592 | 9.01746 | 10 |
| -3 | 17  | -2 | 76.8109 | 7.34097 | 12 |
| -3 | 17  | -2 | 84.1277 | 5.34808 | 6  |
| -4 | -17 | -2 | 9.43976 | 5.00872 | 1  |



|    |     |    |         |         |    |
|----|-----|----|---------|---------|----|
| 4  | 17  | 2  | 11.4079 | 4.11991 | 10 |
| -4 | 17  | -2 | 10.0650 | 0.78338 | 6  |
| -4 | 17  | -2 | 9.73025 | 0.94284 | 9  |
| -4 | 17  | -2 | 10.7023 | 0.75863 | 6  |
| -4 | 17  | -2 | 9.51898 | 1.17234 | 9  |
| -4 | 17  | -2 | 9.35916 | 3.12115 | 12 |
| -5 | -17 | -2 | 0.39245 | 3.90004 | 10 |
| -5 | -17 | -2 | 7.42169 | 4.51738 | 1  |
| -5 | 17  | -2 | 2.41607 | 3.23064 | 12 |
| 5  | 17  | 2  | 3.76135 | 4.47101 | 10 |
| -6 | -17 | -2 | 27.8870 | 4.90105 | 10 |
| -7 | -17 | -2 | 1.16855 | 2.54996 | 10 |
| -7 | -17 | -2 | 0.43567 | 2.14954 | 10 |
| -7 | -18 | 2  | 11.3044 | 3.16782 | 10 |
| -6 | 18  | 2  | 7.99266 | 1.03597 | 9  |
| -6 | 18  | 2  | 9.22480 | 0.71914 | 6  |
| 6  | 18  | -2 | 5.36381 | 4.05206 | 10 |
| -6 | 18  | 2  | 7.92478 | 0.73536 | 6  |
| 5  | 18  | -2 | 1.30483 | 3.73297 | 10 |
| -5 | 18  | 2  | 0.35112 | 0.79409 | 9  |
| -5 | 18  | 2  | 1.07590 | 0.48821 | 6  |
| -4 | -18 | 2  | 83.3232 | 7.11719 | 13 |
| 4  | 18  | -2 | 79.2007 | 8.39291 | 10 |
| -4 | 18  | 2  | 88.1843 | 5.86161 | 9  |
| -4 | 18  | 2  | 86.8132 | 5.40788 | 6  |
| -3 | -18 | 2  | 15.3821 | 3.52481 | 13 |
| 3  | 18  | -2 | 20.0204 | 4.24569 | 10 |
| -3 | 18  | 2  | 17.4436 | 2.11258 | 9  |
| -2 | -18 | 2  | 16.4963 | 4.29691 | 13 |
| -2 | 18  | 2  | 15.2225 | 1.92966 | 11 |
| 2  | 18  | -2 | 18.0772 | 3.63326 | 10 |
| -1 | 18  | 2  | 16.3017 | 3.46868 | 10 |
| 0  | -18 | -2 | 68.2610 | 8.38441 | 2  |
| 0  | 18  | -2 | 53.2815 | 5.93212 | 11 |
| 0  | 18  | 2  | 62.4446 | 6.23872 | 10 |
| -1 | -18 | -2 | 28.9339 | 5.97785 | 2  |
| -1 | 18  | -2 | 41.9351 | 3.03103 | 11 |
| -1 | 18  | -2 | 44.1955 | 3.15957 | 11 |
| -2 | -18 | -2 | 7.97165 | 3.79738 | 2  |
| -2 | -18 | -2 | 14.9308 | 3.41637 | 13 |
| -2 | 18  | -2 | 7.81745 | 0.80421 | 6  |
| -2 | 18  | -2 | 5.19775 | 1.34157 | 9  |
| 2  | 18  | 2  | 3.70013 | 3.48615 | 10 |
| -2 | 18  | -2 | -3.5607 | 3.53622 | 12 |
| -3 | -18 | -2 | 2.01375 | 2.18924 | 13 |
| -3 | 18  | -2 | 1.31484 | 0.55630 | 6  |
| -3 | 18  | -2 | 0.78337 | 2.67903 | 12 |
| -3 | 18  | -2 | 2.18058 | 0.96495 | 9  |
| -3 | 18  | -2 | 1.79095 | 0.42181 | 6  |
| 3  | 18  | 2  | 5.60675 | 3.52847 | 10 |

|    |     |    |         |         |    |
|----|-----|----|---------|---------|----|
| 4  | 18  | 2  | 20.0915 | 4.76604 | 10 |
| -4 | 18  | -2 | 16.3125 | 3.50412 | 12 |
| -4 | 18  | -2 | 16.0186 | 1.08674 | 6  |
| -4 | 18  | -2 | 14.6675 | 1.26596 | 9  |
| -4 | 18  | -2 | 16.5508 | 1.06768 | 6  |
| -4 | 18  | -2 | 14.6466 | 1.46385 | 9  |
| 5  | 18  | 2  | 21.6900 | 4.89566 | 10 |
| -6 | -18 | -2 | 27.5760 | 4.64456 | 10 |
| -7 | -18 | -2 | 36.9734 | 3.92336 | 10 |
| -7 | -18 | -2 | 38.7904 | 3.81226 | 10 |
| -7 | -19 | 2  | 10.1263 | 2.86298 | 10 |
| 7  | 19  | -2 | 11.9930 | 3.64637 | 10 |
| 6  | 19  | -2 | 7.10157 | 4.35741 | 10 |
| -6 | 19  | 2  | 17.7345 | 1.37892 | 9  |
| -6 | 19  | 2  | 16.3391 | 1.26079 | 9  |
| -5 | 19  | 2  | 1.59580 | 0.83600 | 9  |
| 5  | 19  | -2 | 0.52612 | 3.78492 | 10 |
| -5 | 19  | 2  | 1.51041 | 0.51911 | 6  |
| -4 | -19 | 2  | 11.2703 | 3.25840 | 13 |
| -4 | 19  | 2  | 10.8419 | 1.07644 | 6  |
| 4  | 19  | -2 | 11.3035 | 3.98973 | 10 |
| -4 | 19  | 2  | 11.5687 | 1.49545 | 9  |
| -3 | -19 | 2  | 138.432 | 10.7174 | 13 |
| 3  | 19  | -2 | 141.978 | 11.4152 | 10 |
| -2 | -19 | 2  | 61.2966 | 5.82472 | 13 |
| -2 | 19  | 2  | 44.8161 | 3.95519 | 11 |
| -1 | -19 | 2  | 24.4376 | 4.02004 | 13 |
| 1  | 19  | -2 | 30.3601 | 4.96116 | 10 |
| 0  | -19 | -2 | 27.4191 | 4.63706 | 13 |
| 0  | 19  | 2  | 43.1931 | 5.08549 | 10 |
| -1 | -19 | -2 | 17.8371 | 3.57883 | 13 |
| -1 | 19  | -2 | 11.8624 | 1.55241 | 11 |
| 1  | 19  | 2  | 18.9193 | 3.69560 | 10 |
| -1 | 19  | -2 | 10.9315 | 1.52941 | 11 |
| -2 | -19 | -2 | 24.8237 | 3.78514 | 13 |
| 2  | 19  | 2  | 19.1917 | 4.07426 | 10 |
| -2 | 19  | -2 | 20.7821 | 1.67103 | 6  |
| -2 | 19  | -2 | 19.9153 | 2.16184 | 9  |
| -3 | -19 | -2 | 43.9025 | 5.60800 | 13 |
| 3  | 19  | 2  | 45.5559 | 6.66576 | 10 |
| -3 | 19  | -2 | 46.5600 | 3.04700 | 6  |
| -3 | 19  | -2 | 50.1915 | 3.49554 | 9  |
| -4 | 19  | -2 | 0.19317 | 0.46479 | 9  |
| 4  | 19  | 2  | 11.0761 | 4.32384 | 10 |
| 5  | 19  | 2  | 6.00945 | 2.96075 | 10 |
| -6 | -19 | -2 | 10.0825 | 2.44700 | 10 |
| -6 | -19 | -2 | 9.22920 | 2.67613 | 10 |
| 7  | 20  | -2 | 27.3217 | 4.48076 | 10 |
| 6  | 20  | -2 | -1.8815 | 3.35041 | 10 |
| -6 | 20  | 2  | 2.27020 | 0.34157 | 9  |

|    |     |    |         |         |    |
|----|-----|----|---------|---------|----|
| 5  | 20  | -2 | -3.2086 | 3.40082 | 10 |
| -5 | 20  | 2  | 1.08804 | 0.40376 | 6  |
| -5 | 20  | 2  | 1.57644 | 0.40746 | 6  |
| -5 | 20  | 2  | 1.40184 | 0.77889 | 9  |
| -4 | -20 | 2  | 11.1492 | 3.48252 | 13 |
| -4 | 20  | 2  | 4.34484 | 0.73146 | 6  |
| -4 | 20  | 2  | 2.85234 | 1.28544 | 9  |
| 4  | 20  | -2 | 0.22730 | 3.71019 | 10 |
| -3 | -20 | 2  | 3.93085 | 2.94763 | 13 |
| 3  | 20  | -2 | 4.75548 | 3.26685 | 10 |
| -2 | -20 | 2  | 277.018 | 18.7957 | 13 |
| -2 | 20  | 2  | 288.785 | 17.2204 | 11 |
| 2  | 20  | -2 | 265.008 | 19.0464 | 10 |
| -2 | 20  | 2  | 282.156 | 17.2741 | 11 |
| -1 | -20 | 2  | 109.837 | 8.96052 | 13 |
| -1 | 20  | 2  | 125.596 | 8.07664 | 11 |
| 1  | 20  | -2 | 112.528 | 8.91237 | 10 |
| 0  | -20 | -2 | 48.1165 | 5.56799 | 13 |
| 0  | 20  | 2  | 41.2029 | 5.36944 | 10 |
| 0  | 20  | -2 | 38.0737 | 3.92395 | 11 |
| 1  | 20  | 2  | 7.57528 | 3.00514 | 10 |
| -2 | -20 | -2 | -0.7491 | 2.13615 | 13 |
| -2 | 20  | -2 | 1.12157 | 1.24184 | 9  |
| -2 | 20  | -2 | 2.97524 | 0.64844 | 6  |
| 2  | 20  | 2  | 1.08773 | 2.92534 | 10 |
| -3 | -20 | -2 | 125.724 | 9.64326 | 13 |
| -3 | 20  | -2 | 126.737 | 7.90883 | 6  |
| 3  | 20  | 2  | 129.222 | 10.9329 | 10 |
| -3 | 20  | -2 | 130.550 | 8.25002 | 9  |
| -4 | 20  | -2 | 19.9684 | 1.50975 | 9  |
| -4 | 20  | -2 | 21.4109 | 1.63605 | 9  |
| 4  | 20  | 2  | 20.3009 | 4.73263 | 10 |
| 5  | 20  | 2  | -4.8423 | 3.52233 | 10 |
| -6 | -20 | -2 | 0.27901 | 1.79243 | 10 |
| -6 | -20 | -2 | 0.89387 | 1.55666 | 10 |
| 6  | 20  | 2  | 1.61909 | 2.17670 | 10 |
| 6  | 21  | -2 | 7.62251 | 2.72618 | 10 |
| -5 | 21  | 2  | 4.91690 | 0.55249 | 6  |
| -5 | 21  | 2  | 4.79332 | 0.53124 | 6  |
| 5  | 21  | -2 | 7.85426 | 4.01429 | 10 |
| -5 | 21  | 2  | 4.21085 | 0.89126 | 9  |
| 4  | 21  | -2 | 3.63974 | 3.32859 | 10 |
| -4 | 21  | 2  | 3.24141 | 0.63132 | 6  |
| -4 | 21  | 2  | 3.23405 | 1.14694 | 9  |
| -3 | -21 | 2  | 12.7616 | 3.48012 | 13 |
| 3  | 21  | -2 | 12.7148 | 3.83085 | 10 |
| -2 | 21  | 2  | 74.2815 | 4.87041 | 11 |
| -2 | 21  | 2  | 78.2462 | 4.86507 | 11 |
| -1 | -21 | 2  | -0.1640 | 2.09575 | 13 |
| 1  | -21 | -2 | 3.91271 | 2.56520 | 13 |

|    |     |    |         |         |    |
|----|-----|----|---------|---------|----|
| -1 | 21  | 2  | 5.49202 | 1.49590 | 11 |
| 1  | 21  | -2 | 0.59859 | 2.23570 | 10 |
| 0  | -21 | -2 | 27.0703 | 4.86523 | 13 |
| 0  | 21  | 2  | 28.6298 | 4.69582 | 10 |
| -1 | -21 | -2 | 424.936 | 27.4377 | 13 |
| 1  | 21  | 2  | 430.082 | 28.0408 | 10 |
| -2 | -21 | -2 | 80.0841 | 6.94135 | 13 |
| 2  | 21  | 2  | 73.7913 | 7.70311 | 10 |
| -2 | 21  | -2 | 77.8764 | 4.94227 | 6  |
| -2 | 21  | -2 | 76.7684 | 5.43378 | 9  |
| -3 | -21 | -2 | 78.6468 | 7.04624 | 13 |
| -3 | 21  | -2 | 76.7798 | 4.92257 | 6  |
| 3  | 21  | 2  | 82.0961 | 8.22258 | 10 |
| -3 | 21  | -2 | 77.9020 | 5.30861 | 9  |
| 4  | 21  | 2  | 9.32496 | 3.01341 | 10 |
| -4 | 21  | -2 | 3.87542 | 0.56478 | 9  |
| -4 | 21  | -2 | 3.80559 | 0.52015 | 9  |
| 5  | 21  | 2  | 9.55883 | 3.83397 | 10 |
| 6  | 21  | 2  | 4.09590 | 2.11491 | 10 |
| 6  | 22  | -2 | 22.0170 | 3.42895 | 10 |
| -5 | 22  | 2  | 35.6796 | 2.47562 | 9  |
| -5 | 22  | 2  | 33.6177 | 2.18316 | 6  |
| -5 | 22  | 2  | 33.0287 | 2.18250 | 6  |
| 5  | 22  | -2 | 37.7679 | 4.59706 | 10 |
| -4 | -22 | 2  | 4.05566 | 2.40253 | 13 |
| 4  | 22  | -2 | 3.77231 | 3.23396 | 10 |
| -4 | 22  | 2  | 3.01836 | 0.94145 | 9  |
| -4 | 22  | 2  | 3.19808 | 0.54844 | 6  |
| -3 | -22 | 2  | 3.56158 | 2.51426 | 13 |
| 3  | 22  | -2 | 2.75556 | 2.95952 | 10 |
| -2 | -22 | 2  | 35.8530 | 6.17804 | 13 |
| 1  | -22 | -2 | 58.6825 | 6.15599 | 13 |
| -1 | 22  | 2  | 59.2091 | 4.48635 | 11 |
| 0  | -22 | -2 | 12.1198 | 3.12203 | 13 |
| 0  | 22  | 2  | 11.0907 | 2.91163 | 10 |
| 0  | 22  | -2 | 17.2538 | 2.11142 | 11 |
| -1 | -22 | -2 | 21.0675 | 3.76182 | 13 |
| 1  | 22  | 2  | 17.8913 | 3.54675 | 10 |
| -2 | -22 | -2 | 38.1516 | 5.12557 | 13 |
| -2 | 22  | -2 | 31.0263 | 2.29650 | 6  |
| -2 | 22  | -2 | 31.0504 | 2.37842 | 6  |
| 2  | 22  | 2  | 35.3076 | 5.59946 | 10 |
| -2 | 22  | -2 | 34.5834 | 3.22571 | 9  |
| -3 | -22 | -2 | 12.8533 | 3.03552 | 13 |
| -3 | 22  | -2 | 15.7263 | 1.22754 | 6  |
| -3 | 22  | -2 | 16.5363 | 1.79098 | 9  |
| 3  | 22  | 2  | 11.9432 | 3.11154 | 10 |
| -3 | 22  | -2 | 15.3805 | 1.26122 | 6  |
| 4  | 22  | 2  | 0.62397 | 3.28629 | 10 |
| 5  | 22  | 2  | 1.72079 | 3.04554 | 10 |

|    |     |    |         |         |    |
|----|-----|----|---------|---------|----|
| -5 | 23  | 2  | 4.46563 | 0.56765 | 9  |
| 5  | 23  | -2 | -0.8343 | 2.62763 | 10 |
| -5 | 23  | 2  | 5.72493 | 0.64793 | 9  |
| -4 | -23 | 2  | 46.1557 | 5.37186 | 13 |
| -4 | 23  | 2  | 42.1040 | 2.88680 | 6  |
| -4 | 23  | 2  | 43.1838 | 3.22720 | 9  |
| 4  | 23  | -2 | 47.7071 | 5.54652 | 10 |
| -3 | -23 | 2  | 30.2266 | 4.76855 | 13 |
| 3  | 23  | -2 | 29.7320 | 4.69486 | 10 |
| -2 | -23 | 2  | 31.1229 | 4.82019 | 13 |
| 2  | 23  | -2 | 28.0071 | 4.71714 | 10 |
| 1  | -23 | -2 | 9.91444 | 2.59557 | 13 |
| -1 | -23 | 2  | 12.9837 | 2.81279 | 13 |
| -1 | 23  | 2  | 10.6235 | 1.44985 | 11 |
| 1  | 23  | -2 | 12.4128 | 2.24000 | 11 |
| -1 | 23  | 2  | 9.75209 | 1.40698 | 11 |
| 0  | -23 | -2 | 88.1238 | 8.25215 | 13 |
| 0  | -23 | 2  | 90.0507 | 7.65383 | 13 |
| 0  | 23  | -2 | 104.005 | 6.20210 | 11 |
| 0  | 23  | -2 | 99.9686 | 6.14992 | 11 |
| 0  | 23  | 2  | 91.1856 | 7.07717 | 11 |
| -1 | -23 | -2 | 31.7854 | 4.38543 | 13 |
| 1  | 23  | 2  | 32.0872 | 4.57765 | 10 |
| -2 | -23 | -2 | 7.36150 | 2.73863 | 13 |
| -2 | 23  | -2 | 4.45184 | 0.66582 | 6  |
| 2  | 23  | 2  | 9.41932 | 3.17826 | 10 |
| -2 | 23  | -2 | 4.69953 | 1.27013 | 9  |
| -3 | -23 | -2 | 24.1628 | 3.75271 | 13 |
| -3 | 23  | -2 | 27.6524 | 2.27123 | 9  |
| 3  | 23  | 2  | 20.6506 | 4.21420 | 10 |
| -3 | 23  | -2 | 27.4183 | 1.88914 | 6  |
| -3 | 23  | -2 | 29.4647 | 1.84938 | 6  |
| 4  | 23  | 2  | 4.75440 | 2.27850 | 10 |
| 5  | 23  | 2  | 3.96707 | 2.74480 | 10 |
| 5  | 24  | -2 | 3.39379 | 1.74002 | 10 |
| -4 | -24 | 2  | 4.54115 | 1.91770 | 13 |
| -4 | 24  | 2  | 1.67689 | 0.43082 | 6  |
| -4 | 24  | 2  | 1.83978 | 0.69949 | 9  |
| 4  | 24  | -2 | 4.45190 | 2.44522 | 10 |
| -3 | -24 | 2  | 4.40964 | 2.33047 | 13 |
| 3  | 24  | -2 | 4.17617 | 2.29199 | 10 |
| -3 | 24  | 2  | 4.04597 | 1.20085 | 9  |
| -2 | -24 | 2  | 136.420 | 9.98946 | 13 |
| 2  | 24  | -2 | 126.633 | 9.43805 | 10 |
| 2  | 24  | -2 | 136.537 | 9.21481 | 11 |
| -1 | -24 | 2  | 4.46381 | 2.31520 | 13 |
| 1  | 24  | -2 | 3.70404 | 1.39429 | 11 |
| -1 | 24  | 2  | 2.22258 | 0.31486 | 11 |
| 0  | -24 | -2 | 16.8538 | 3.03242 | 13 |
| 0  | -24 | 2  | 16.2452 | 2.90698 | 13 |

|    |     |    |         |         |    |
|----|-----|----|---------|---------|----|
| 0  | 24  | 2  | 18.7065 | 2.68446 | 11 |
| -1 | -24 | -2 | 1.28348 | 2.25372 | 13 |
| 1  | 24  | 2  | 1.25857 | 1.93438 | 10 |
| -2 | -24 | -2 | 6.71851 | 2.77828 | 13 |
| 2  | 24  | 2  | 0.39683 | 2.51290 | 10 |
| -2 | 24  | -2 | 2.80096 | 1.12811 | 9  |
| -2 | 24  | -2 | 1.98031 | 0.57930 | 6  |
| -3 | -24 | -2 | 1.23775 | 2.49014 | 13 |
| -3 | 24  | -2 | -0.2457 | 0.32040 | 6  |
| 3  | 24  | 2  | 1.53842 | 2.65285 | 10 |
| -3 | 24  | -2 | -0.0362 | 0.33974 | 6  |
| -3 | 24  | -2 | -0.2044 | 0.61756 | 9  |
| 4  | 24  | 2  | 11.1420 | 2.48194 | 10 |
| -4 | -25 | 2  | 12.2870 | 2.30296 | 13 |
| -4 | 25  | 2  | 12.0323 | 1.25942 | 9  |
| 4  | 25  | -2 | 11.5049 | 2.36256 | 10 |
| -3 | -25 | 2  | 13.3875 | 2.55687 | 13 |
| -3 | 25  | 2  | 18.1483 | 1.87938 | 9  |
| 3  | 25  | -2 | 14.2246 | 2.65294 | 10 |
| -2 | -25 | 2  | 6.89574 | 2.44545 | 13 |
| 2  | 25  | -2 | 2.68622 | 1.68051 | 11 |
| 1  | -25 | -2 | 1.72730 | 2.47192 | 13 |
| -1 | -25 | 2  | 0.29147 | 2.12708 | 13 |
| 1  | 25  | -2 | 0.25185 | 0.88383 | 11 |
| 1  | 25  | -2 | -0.6592 | 0.86170 | 11 |
| 0  | -25 | 2  | 3.18107 | 2.58197 | 13 |
| 0  | -25 | -2 | 5.09745 | 2.26192 | 13 |
| 0  | 25  | 2  | 4.22800 | 1.31570 | 11 |
| -1 | -25 | -2 | 22.8134 | 3.38157 | 13 |
| 1  | 25  | 2  | 23.0452 | 2.84512 | 11 |
| -2 | -25 | -2 | 3.92213 | 2.28861 | 13 |
| -2 | 25  | -2 | 2.34784 | 0.94523 | 9  |
| 2  | 25  | 2  | 4.43571 | 2.17738 | 10 |
| -2 | 25  | -2 | 3.28826 | 0.58203 | 6  |
| -3 | -25 | -2 | 15.2573 | 2.54915 | 13 |
| -3 | 25  | -2 | 13.6688 | 1.24774 | 9  |
| 3  | 25  | 2  | 13.1645 | 2.79741 | 10 |
| -3 | 25  | -2 | 13.1096 | 1.19730 | 9  |
| 4  | 25  | 2  | 2.96957 | 2.15408 | 10 |
| -3 | -26 | 2  | 21.3346 | 3.10763 | 13 |
| 3  | 26  | -2 | 19.2771 | 2.31373 | 11 |
| 2  | -26 | -2 | 2.73574 | 1.58670 | 13 |
| -2 | -26 | 2  | 4.79933 | 2.03540 | 13 |
| 2  | 26  | -2 | 2.57264 | 1.03442 | 11 |
| 2  | 26  | -2 | 2.40572 | 0.99157 | 11 |
| 1  | -26 | -2 | 13.1100 | 2.40178 | 13 |
| -1 | -26 | 2  | 13.0162 | 2.42380 | 13 |
| 0  | -26 | 2  | 2.89210 | 1.84509 | 13 |
| 0  | -26 | -2 | 0.50328 | 1.90581 | 13 |
| -1 | -26 | -2 | -0.3753 | 2.27129 | 13 |

|    |     |    |         |         |    |
|----|-----|----|---------|---------|----|
| 1  | 26  | 2  | 0.53616 | 1.20828 | 11 |
| -2 | -26 | -2 | 5.03826 | 1.84225 | 13 |
| -2 | 26  | -2 | 2.43493 | 0.90854 | 9  |
| 2  | 26  | 2  | 3.16873 | 1.44579 | 11 |
| 2  | 26  | 2  | 3.71625 | 1.72789 | 10 |
| 3  | 26  | 2  | -0.1461 | 1.50480 | 10 |
| -2 | -27 | 2  | 7.51559 | 1.83063 | 13 |
| 2  | -27 | -2 | 5.97674 | 1.67354 | 13 |
| 1  | -27 | -2 | 9.96204 | 2.21456 | 13 |
| -1 | -27 | 2  | 9.33832 | 1.98548 | 13 |
| 0  | -27 | 2  | 6.54088 | 2.05619 | 13 |
| 0  | -27 | -2 | 7.65569 | 1.88849 | 13 |
| -1 | -27 | -2 | 2.60776 | 1.66437 | 13 |
| -2 | -27 | -2 | 4.54243 | 1.54296 | 13 |
| 10 | 0   | -3 | 48.8988 | 5.70903 | 13 |
| -9 | 0   | 3  | 16.8927 | 2.77442 | 7  |
| -8 | 0   | 3  | 26.3045 | 2.93768 | 11 |
| 8  | 0   | -3 | 28.0194 | 4.86830 | 13 |
| -7 | 0   | 3  | -1.8057 | 1.96288 | 10 |
| -6 | 0   | 3  | 200.122 | 13.5976 | 4  |
| -6 | 0   | 3  | 201.101 | 14.0818 | 1  |
| -5 | 0   | 3  | 63.0540 | 6.17592 | 1  |
| -5 | 0   | 3  | 64.3334 | 5.10644 | 4  |
| -4 | 0   | 3  | 42.5368 | 3.70355 | 5  |
| -4 | 0   | 3  | 40.7104 | 5.02336 | 1  |
| -4 | 0   | 3  | 42.2224 | 3.91476 | 5  |
| -4 | 0   | 3  | 41.7232 | 3.63247 | 4  |
| -3 | 0   | 3  | 6.29994 | 1.20970 | 3  |
| -3 | 0   | 3  | 9.18633 | 1.51431 | 4  |
| -3 | 0   | 3  | 7.49017 | 2.13515 | 5  |
| -2 | 0   | 3  | 963.375 | 57.7590 | 4  |
| -2 | 0   | 3  | 959.920 | 58.8575 | 5  |
| -2 | 0   | 3  | 917.981 | 57.6854 | 3  |
| -1 | 0   | 3  | 0.33987 | 1.63108 | 5  |
| 0  | 0   | -3 | 16.6362 | 2.25612 | 4  |
| 0  | 0   | -3 | 17.2041 | 2.09183 | 3  |
| 0  | 0   | -3 | 18.4431 | 3.09954 | 5  |
| 0  | 0   | -3 | 20.7667 | 2.84609 | 5  |
| 0  | 0   | 3  | 15.3265 | 3.44426 | 5  |
| -1 | 0   | -3 | 78.9667 | 5.39345 | 3  |
| -1 | 0   | -3 | 80.9083 | 5.85708 | 5  |
| -1 | 0   | -3 | 81.4663 | 5.68437 | 4  |
| -1 | 0   | -3 | 83.0206 | 5.74460 | 5  |
| -1 | 0   | -3 | 84.5806 | 5.52284 | 3  |
| -1 | 0   | -3 | 82.2707 | 5.47734 | 4  |
| -2 | 0   | -3 | 890.662 | 55.1143 | 2  |
| -2 | 0   | -3 | 891.280 | 54.3206 | 3  |
| -2 | 0   | -3 | 876.354 | 54.2928 | 4  |
| -2 | 0   | -3 | 895.029 | 54.4767 | 4  |
| -2 | 0   | -3 | 898.044 | 54.3908 | 3  |

|    |    |    |         |         |    |
|----|----|----|---------|---------|----|
| -3 | 0  | -3 | 62.4696 | 4.76782 | 4  |
| -3 | 0  | -3 | 61.9952 | 4.58881 | 3  |
| -3 | 0  | -3 | 60.8870 | 4.42388 | 4  |
| -3 | 0  | -3 | 61.7169 | 5.70609 | 2  |
| -4 | 0  | -3 | 133.905 | 10.7191 | 2  |
| -4 | 0  | -3 | 136.393 | 9.25727 | 3  |
| -4 | 0  | -3 | 133.642 | 9.18413 | 4  |
| -6 | 0  | -3 | 2.52305 | 1.20950 | 8  |
| -7 | 0  | -3 | 5.74736 | 1.61062 | 8  |
| -8 | 0  | -3 | 92.4126 | 6.34583 | 8  |
| 9  | 0  | 3  | 6.31915 | 2.52119 | 13 |
| 10 | -1 | -3 | 17.1116 | 3.28677 | 13 |
| 10 | 1  | -3 | 16.3318 | 3.41543 | 13 |
| 9  | -1 | -3 | 47.5516 | 6.16993 | 13 |
| -9 | -1 | 3  | 40.8911 | 3.76821 | 7  |
| -9 | 1  | 3  | 46.7737 | 4.15055 | 7  |
| 9  | 1  | -3 | 39.0637 | 7.05522 | 13 |
| -8 | -1 | 3  | 54.3218 | 4.79657 | 10 |
| 8  | -1 | -3 | 38.5075 | 6.15433 | 13 |
| -8 | 1  | 3  | 45.9728 | 3.68302 | 11 |
| 8  | 1  | -3 | 50.4191 | 6.27719 | 13 |
| 8  | 1  | -3 | 52.4111 | 7.35291 | 13 |
| -7 | -1 | 3  | 3.07270 | 2.18803 | 10 |
| -7 | 1  | 3  | 1.24126 | 1.85794 | 10 |
| -6 | -1 | 3  | 255.313 | 17.1228 | 1  |
| -6 | 1  | 3  | 232.523 | 16.0098 | 4  |
| -5 | 1  | 3  | 250.834 | 17.1716 | 1  |
| -5 | 1  | 3  | 258.003 | 16.4660 | 4  |
| -4 | -1 | 3  | 118.240 | 8.21508 | 4  |
| -4 | -1 | 3  | 120.111 | 9.07257 | 5  |
| -4 | -1 | 3  | 119.183 | 9.59323 | 1  |
| -4 | 1  | 3  | 117.818 | 7.99388 | 3  |
| -4 | 1  | 3  | 122.605 | 8.15651 | 4  |
| -4 | 1  | 3  | 113.154 | 9.01410 | 1  |
| -3 | -1 | 3  | 236.068 | 15.4482 | 5  |
| -3 | -1 | 3  | 228.137 | 14.1512 | 4  |
| -3 | -1 | 3  | 226.976 | 14.0359 | 3  |
| -3 | 1  | 3  | 210.313 | 14.6360 | 5  |
| -3 | 1  | 3  | 215.089 | 13.9731 | 3  |
| -3 | 1  | 3  | 209.342 | 14.0011 | 4  |
| -2 | -1 | 3  | 463.098 | 29.1345 | 4  |
| -2 | -1 | 3  | 473.198 | 30.3839 | 5  |
| -2 | 1  | 3  | 474.515 | 29.0581 | 3  |
| -2 | 1  | 3  | 479.390 | 29.2851 | 4  |
| -2 | 1  | 3  | 465.538 | 29.0732 | 4  |
| -2 | 1  | 3  | 477.410 | 30.0456 | 5  |
| -1 | -1 | 3  | 458.605 | 29.0030 | 5  |
| 1  | 1  | -3 | 438.393 | 28.0444 | 4  |
| -1 | 1  | 3  | 477.764 | 27.9709 | 4  |
| -1 | 1  | 3  | 444.125 | 28.8676 | 5  |



|    |    |    |         |         |   |
|----|----|----|---------|---------|---|
| 0  | 1  | -3 | 25.4703 | 2.71909 | 5 |
| 0  | 1  | -3 | 24.3076 | 2.09192 | 3 |
| 0  | 1  | -3 | 25.5593 | 2.26105 | 4 |
| 0  | 1  | -3 | 23.9435 | 2.16387 | 4 |
| 0  | 1  | -3 | 22.4441 | 2.63184 | 5 |
| -1 | -1 | -3 | 210.487 | 14.4153 | 2 |
| -1 | -1 | -3 | 205.158 | 14.6404 | 5 |
| -1 | -1 | -3 | 219.830 | 14.0387 | 3 |
| -1 | -1 | -3 | 210.195 | 13.9751 | 4 |
| -1 | -1 | -3 | 211.258 | 14.3663 | 5 |
| -1 | -1 | -3 | 215.702 | 14.1408 | 4 |
| -1 | 1  | -3 | 240.564 | 13.9176 | 4 |
| -1 | 1  | -3 | 241.818 | 13.9565 | 3 |
| -1 | 1  | -3 | 236.002 | 13.8885 | 3 |
| -1 | 1  | -3 | 236.793 | 14.0188 | 4 |
| -2 | -1 | -3 | 331.406 | 20.6841 | 2 |
| -2 | -1 | -3 | 328.133 | 19.8054 | 4 |
| -2 | -1 | -3 | 332.970 | 20.0020 | 4 |
| -2 | -1 | -3 | 328.843 | 19.8607 | 5 |
| -2 | -1 | -3 | 328.222 | 19.8704 | 3 |
| -2 | -1 | -3 | 325.671 | 19.9331 | 5 |
| -2 | 1  | -3 | 306.856 | 19.7436 | 4 |
| -2 | 1  | -3 | 295.139 | 19.6161 | 3 |
| -2 | 1  | -3 | 297.898 | 20.3793 | 2 |
| -2 | 1  | -3 | 306.724 | 19.6865 | 3 |
| -2 | 1  | -3 | 308.121 | 19.6091 | 4 |
| -3 | -1 | -3 | 21.7697 | 2.73812 | 4 |
| -3 | -1 | -3 | 20.4889 | 2.49203 | 3 |
| -3 | -1 | -3 | 17.5980 | 3.32995 | 2 |
| -3 | -1 | -3 | 20.8318 | 3.05612 | 1 |
| -3 | 1  | -3 | 24.9896 | 2.16383 | 4 |
| -3 | 1  | -3 | 22.7082 | 3.63801 | 2 |
| -3 | 1  | -3 | 23.4165 | 2.36173 | 4 |
| -3 | 1  | -3 | 25.3840 | 2.24717 | 3 |
| -4 | -1 | -3 | 5.60822 | 1.41337 | 3 |
| -4 | -1 | -3 | 5.38962 | 1.78004 | 1 |
| -4 | -1 | -3 | 5.35914 | 2.71871 | 2 |
| -4 | -1 | -3 | 4.82342 | 1.67312 | 4 |
| -4 | 1  | -3 | 2.32697 | 1.19918 | 4 |
| -4 | 1  | -3 | 1.61794 | 1.15867 | 3 |
| -5 | -1 | -3 | 69.8584 | 5.18007 | 4 |
| -5 | 1  | -3 | 51.9911 | 4.66564 | 3 |
| -5 | 1  | -3 | 54.8120 | 4.11098 | 4 |
| -5 | 1  | -3 | 53.7307 | 4.24736 | 4 |
| -6 | -1 | -3 | 264.649 | 16.6805 | 8 |
| -6 | 1  | -3 | 256.857 | 16.5051 | 8 |
| -7 | -1 | -3 | 19.0775 | 2.63645 | 8 |
| -7 | 1  | -3 | 28.1314 | 2.74255 | 8 |
| -8 | -1 | -3 | 45.2743 | 3.69402 | 8 |
| -8 | 1  | -3 | 40.5335 | 3.34037 | 8 |

|    |    |    |         |         |    |
|----|----|----|---------|---------|----|
| 8  | 1  | 3  | 37.4476 | 6.03218 | 13 |
| 9  | 1  | 3  | 10.0542 | 3.27522 | 13 |
| 10 | -2 | -3 | 3.97933 | 3.06705 | 13 |
| 10 | 2  | -3 | 0.14158 | 2.77616 | 13 |
| -9 | -2 | 3  | 93.5178 | 6.57579 | 7  |
| 9  | -2 | -3 | 78.1833 | 8.59325 | 13 |
| -9 | 2  | 3  | 81.1315 | 6.52625 | 7  |
| 9  | 2  | -3 | 94.6907 | 8.49021 | 13 |
| -8 | -2 | 3  | 1.76902 | 2.07432 | 10 |
| 8  | 2  | -3 | 0.10286 | 2.95298 | 13 |
| 8  | 2  | -3 | 1.31874 | 2.94277 | 13 |
| -8 | 2  | 3  | 5.20673 | 1.15807 | 11 |
| -7 | -2 | 3  | 3.66952 | 2.43757 | 10 |
| -7 | 2  | 3  | 5.73791 | 1.38174 | 11 |
| -6 | -2 | 3  | 127.435 | 10.8952 | 1  |
| -6 | 2  | 3  | 141.615 | 9.44108 | 4  |
| -5 | -2 | 3  | 19.3691 | 2.55643 | 5  |
| -5 | -2 | 3  | 19.5063 | 4.26737 | 1  |
| -4 | 2  | 3  | 163.958 | 12.0515 | 1  |
| -4 | 2  | 3  | 173.996 | 11.2863 | 4  |
| -4 | 2  | 3  | 179.635 | 11.2895 | 3  |
| -3 | -2 | 3  | 322.528 | 20.1833 | 4  |
| -3 | -2 | 3  | 321.716 | 21.5516 | 5  |
| -3 | 2  | 3  | 324.567 | 20.2355 | 4  |
| -3 | 2  | 3  | 321.316 | 19.9434 | 3  |
| -3 | 2  | 3  | 314.282 | 19.9953 | 4  |
| -3 | 2  | 3  | 316.597 | 20.1468 | 5  |
| -2 | -2 | 3  | 2066.56 | 130.958 | 5  |
| -2 | -2 | 3  | 2104.87 | 129.734 | 4  |
| -2 | 2  | 3  | 2167.98 | 130.380 | 5  |
| -2 | 2  | 3  | 2151.47 | 129.641 | 4  |
| -2 | 2  | 3  | 2177.36 | 129.594 | 3  |
| -2 | 2  | 3  | 2155.20 | 129.821 | 4  |
| -1 | -2 | 3  | 555.786 | 36.8074 | 5  |
| 1  | -2 | -3 | 572.904 | 36.1932 | 2  |
| -1 | 2  | 3  | 611.422 | 35.8051 | 4  |
| 1  | 2  | -3 | 603.312 | 35.8971 | 4  |
| -1 | 2  | 3  | 572.887 | 36.6500 | 5  |
| 0  | -2 | -3 | 1403.71 | 96.2782 | 4  |
| 0  | -2 | -3 | 1594.42 | 96.8041 | 5  |
| 0  | 2  | -3 | 1614.36 | 96.1446 | 3  |
| 0  | 2  | -3 | 1634.89 | 96.1107 | 4  |
| 0  | 2  | 3  | 1552.15 | 97.1351 | 5  |
| 0  | 2  | -3 | 1611.99 | 96.4968 | 5  |
| 0  | 2  | -3 | 1583.94 | 96.7828 | 5  |
| 0  | 2  | -3 | 1679.58 | 96.2253 | 4  |
| -1 | -2 | -3 | 13.8246 | 2.26732 | 5  |
| -1 | -2 | -3 | 13.3312 | 1.91027 | 3  |
| -1 | -2 | -3 | 14.1815 | 1.97105 | 4  |
| -1 | -2 | -3 | 13.3416 | 2.50967 | 5  |

|    |    |    |         |         |    |
|----|----|----|---------|---------|----|
| -1 | -2 | -3 | 13.4114 | 1.71080 | 4  |
| -1 | -2 | -3 | 13.4578 | 2.25955 | 2  |
| -1 | 2  | -3 | 10.5387 | 1.39840 | 3  |
| -1 | 2  | -3 | 8.95621 | 1.37488 | 4  |
| 1  | 2  | 3  | 13.8743 | 3.23946 | 5  |
| -1 | 2  | -3 | 11.3852 | 1.59061 | 4  |
| -1 | 2  | -3 | 10.9367 | 1.26096 | 3  |
| -2 | -2 | -3 | 379.774 | 24.6278 | 2  |
| -2 | -2 | -3 | 374.264 | 23.7720 | 3  |
| -2 | -2 | -3 | 373.976 | 24.3916 | 5  |
| -2 | -2 | -3 | 377.439 | 24.1750 | 5  |
| -2 | -2 | -3 | 374.540 | 23.8932 | 4  |
| -2 | 2  | -3 | 381.247 | 23.4263 | 3  |
| -2 | 2  | -3 | 392.820 | 23.4070 | 4  |
| -2 | 2  | -3 | 404.702 | 23.5284 | 3  |
| -2 | 2  | -3 | 374.713 | 23.4770 | 4  |
| -2 | 2  | -3 | 375.884 | 24.2139 | 2  |
| -3 | -2 | -3 | 304.400 | 20.4088 | 3  |
| -3 | -2 | -3 | 329.624 | 20.5600 | 4  |
| -3 | -2 | -3 | 326.680 | 21.5896 | 2  |
| -3 | -2 | -3 | 292.547 | 21.0851 | 1  |
| -3 | 2  | -3 | 321.883 | 20.0139 | 4  |
| -3 | 2  | -3 | 325.763 | 20.0283 | 3  |
| -3 | 2  | -3 | 315.714 | 19.9021 | 4  |
| -3 | 2  | -3 | 338.551 | 21.3969 | 2  |
| -3 | 2  | -3 | 341.050 | 20.1474 | 3  |
| -4 | -2 | -3 | 61.0701 | 6.65962 | 2  |
| -4 | -2 | -3 | 56.9155 | 5.01271 | 4  |
| -4 | -2 | -3 | 64.7595 | 5.86579 | 1  |
| -4 | 2  | -3 | 61.1017 | 4.68148 | 3  |
| -4 | 2  | -3 | 60.3379 | 4.32342 | 4  |
| -4 | 2  | -3 | 62.6192 | 4.25138 | 4  |
| -5 | -2 | -3 | 425.568 | 27.7661 | 4  |
| -5 | -2 | -3 | 438.564 | 29.9088 | 2  |
| -5 | 2  | -3 | 431.757 | 26.5618 | 4  |
| -5 | 2  | -3 | 431.655 | 26.5433 | 4  |
| -5 | 2  | -3 | 449.922 | 27.5294 | 3  |
| -6 | -2 | -3 | 65.3995 | 5.45090 | 10 |
| -6 | -2 | -3 | 65.6473 | 5.08513 | 8  |
| -6 | 2  | -3 | 66.8083 | 4.91327 | 8  |
| -7 | -2 | -3 | 459.609 | 28.5403 | 8  |
| -7 | 2  | -3 | 453.798 | 28.2391 | 8  |
| 7  | 2  | 3  | 457.856 | 29.8410 | 13 |
| -8 | -2 | -3 | 28.4480 | 3.15257 | 8  |
| 8  | 2  | 3  | 28.0106 | 4.50636 | 13 |
| 9  | 2  | 3  | 1.96164 | 2.52144 | 13 |
| -9 | 2  | -3 | 1.40151 | 0.82176 | 9  |
| 10 | -3 | -3 | 5.67861 | 2.50228 | 13 |
| 10 | 3  | -3 | 1.70532 | 2.80615 | 13 |
| 9  | 3  | -3 | 37.9900 | 5.57427 | 13 |

|    |    |    |         |         |    |
|----|----|----|---------|---------|----|
| -9 | 3  | 3  | 29.5349 | 3.17571 | 7  |
| -8 | -3 | 3  | 5.19545 | 2.09354 | 10 |
| 8  | 3  | -3 | 5.43852 | 3.29280 | 13 |
| -8 | 3  | 3  | 7.96168 | 2.14508 | 7  |
| -7 | -3 | 3  | 12.4795 | 3.30550 | 1  |
| -7 | -3 | 3  | 9.33113 | 2.45468 | 10 |
| -7 | 3  | 3  | 6.89939 | 1.37242 | 11 |
| 7  | 3  | -3 | 9.10090 | 3.45579 | 13 |
| -6 | -3 | 3  | 20.6131 | 4.54264 | 1  |
| -6 | 3  | 3  | 37.0139 | 3.39856 | 4  |
| -5 | -3 | 3  | 286.590 | 18.4086 | 5  |
| -5 | -3 | 3  | 287.719 | 19.2760 | 1  |
| -5 | 3  | 3  | 247.248 | 17.1004 | 3  |
| -5 | 3  | 3  | 251.579 | 17.0297 | 4  |
| -4 | -3 | 3  | 1588.96 | 102.677 | 1  |
| -4 | -3 | 3  | 1640.30 | 102.818 | 5  |
| -4 | 3  | 3  | 1741.88 | 101.077 | 3  |
| -4 | 3  | 3  | 1666.45 | 100.991 | 4  |
| -3 | -3 | 3  | 492.934 | 34.2232 | 5  |
| -3 | 3  | 3  | 528.965 | 32.7229 | 4  |
| -3 | 3  | 3  | 544.222 | 32.5193 | 4  |
| -3 | 3  | 3  | 545.109 | 32.5373 | 3  |
| -2 | -3 | 3  | 3416.34 | 202.879 | 5  |
| -2 | -3 | 3  | 3281.32 | 201.603 | 4  |
| -2 | 3  | 3  | 3050.46 | 201.202 | 3  |
| -2 | 3  | 3  | 3170.33 | 201.426 | 4  |
| 2  | 3  | -3 | 3786.48 | 202.258 | 4  |
| -2 | 3  | 3  | 3269.09 | 202.323 | 5  |
| -2 | 3  | 3  | 3279.13 | 201.357 | 3  |
| -2 | 3  | 3  | 3340.85 | 201.279 | 4  |
| -1 | -3 | 3  | 175.183 | 12.4928 | 5  |
| 1  | -3 | -3 | 183.806 | 11.9023 | 2  |
| -1 | 3  | 3  | 176.030 | 11.2660 | 3  |
| 1  | 3  | -3 | 171.914 | 11.3743 | 4  |
| 1  | 3  | -3 | 179.291 | 12.1949 | 5  |
| -1 | 3  | 3  | 181.174 | 11.3280 | 4  |
| -1 | 3  | 3  | 181.848 | 12.2324 | 5  |
| 0  | -3 | -3 | 245.220 | 13.7149 | 2  |
| 0  | 3  | -3 | 217.482 | 12.9046 | 4  |
| 0  | 3  | -3 | 193.004 | 12.8206 | 5  |
| 0  | 3  | -3 | 199.305 | 12.8104 | 3  |
| 0  | 3  | -3 | 197.266 | 12.9052 | 5  |
| 0  | 3  | -3 | 192.317 | 12.7759 | 4  |
| 0  | 3  | -3 | 194.070 | 12.7455 | 3  |
| -1 | -3 | -3 | 1334.62 | 78.1232 | 5  |
| -1 | -3 | -3 | 1315.89 | 77.4752 | 3  |
| -1 | -3 | -3 | 1334.96 | 77.6184 | 4  |
| -1 | -3 | -3 | 1303.70 | 78.0225 | 2  |
| -1 | 3  | -3 | 1263.86 | 77.1329 | 3  |
| -1 | 3  | -3 | 1231.04 | 77.1379 | 4  |

|    |    |    |         |         |    |
|----|----|----|---------|---------|----|
| -1 | 3  | -3 | 1204.71 | 77.0782 | 4  |
| 1  | 3  | 3  | 1259.95 | 78.5237 | 5  |
| -1 | 3  | -3 | 1190.98 | 77.0488 | 3  |
| -2 | -3 | -3 | 326.086 | 22.5096 | 2  |
| -2 | -3 | -3 | 332.038 | 21.7308 | 3  |
| -2 | -3 | -3 | 341.333 | 21.9011 | 4  |
| -2 | -3 | -3 | 324.495 | 22.3236 | 5  |
| -2 | 3  | -3 | 365.441 | 21.3590 | 3  |
| -2 | 3  | -3 | 363.310 | 21.3047 | 3  |
| -2 | 3  | -3 | 365.620 | 21.2223 | 4  |
| -2 | 3  | -3 | 348.087 | 21.2761 | 4  |
| -3 | -3 | -3 | 325.353 | 19.7041 | 5  |
| -3 | -3 | -3 | 314.357 | 19.6784 | 4  |
| -3 | -3 | -3 | 325.253 | 20.7367 | 2  |
| -3 | -3 | -3 | 309.368 | 19.7639 | 5  |
| -3 | -3 | -3 | 300.012 | 20.3933 | 1  |
| -3 | 3  | -3 | 297.260 | 18.9611 | 3  |
| -3 | 3  | -3 | 294.329 | 18.7467 | 4  |
| -3 | 3  | -3 | 290.713 | 18.8838 | 3  |
| -3 | 3  | -3 | 288.918 | 18.6783 | 4  |
| -4 | -3 | -3 | 374.074 | 25.0846 | 1  |
| -4 | -3 | -3 | 379.659 | 24.4240 | 4  |
| -4 | -3 | -3 | 381.040 | 25.8400 | 2  |
| -4 | 3  | -3 | 380.020 | 23.1438 | 4  |
| -4 | 3  | -3 | 385.918 | 23.7860 | 3  |
| -5 | -3 | -3 | 34.8753 | 5.59245 | 2  |
| -5 | -3 | -3 | 31.6328 | 4.01707 | 4  |
| -5 | -3 | -3 | 32.9437 | 3.71672 | 8  |
| -5 | -3 | -3 | 37.9997 | 4.56800 | 1  |
| -6 | -3 | -3 | 10.6397 | 2.85133 | 10 |
| -6 | -3 | -3 | 7.79014 | 1.81358 | 8  |
| -6 | 3  | -3 | 9.26386 | 1.15765 | 9  |
| -6 | 3  | -3 | 10.0055 | 1.49020 | 8  |
| -7 | -3 | -3 | 22.7573 | 3.50652 | 8  |
| 7  | 3  | 3  | 23.9773 | 5.15729 | 13 |
| -7 | 3  | -3 | 31.1556 | 2.60381 | 9  |
| -7 | 3  | -3 | 33.4990 | 2.75991 | 8  |
| -8 | -3 | -3 | 4.40219 | 1.73121 | 8  |
| 8  | 3  | 3  | 8.76495 | 4.11990 | 13 |
| -8 | 3  | -3 | 6.89190 | 1.31674 | 9  |
| 9  | 3  | 3  | 48.1452 | 5.50989 | 13 |
| -9 | 3  | -3 | 45.7940 | 3.26233 | 9  |
| 10 | 4  | -3 | -0.5753 | 3.38301 | 13 |
| -9 | -4 | 3  | 0.64015 | 1.93484 | 10 |
| -9 | 4  | 3  | -0.3055 | 1.53628 | 7  |
| 9  | 4  | -3 | -1.2721 | 3.59497 | 13 |
| -8 | -4 | 3  | 13.5126 | 2.75311 | 10 |
| -8 | 4  | 3  | 13.8282 | 2.47430 | 7  |
| 8  | 4  | -3 | 15.9661 | 3.96059 | 13 |
| -6 | 4  | 3  | 45.3697 | 3.79318 | 4  |

|    |    |    |         |         |   |
|----|----|----|---------|---------|---|
| -5 | -4 | 3  | 3.30205 | 2.29751 | 5 |
| -5 | -4 | 3  | 0.76999 | 2.75193 | 1 |
| -4 | -4 | 3  | 134.742 | 11.0986 | 1 |
| -4 | -4 | 3  | 137.459 | 11.0378 | 5 |
| -4 | 4  | 3  | 123.331 | 8.72324 | 3 |
| -4 | 4  | 3  | 125.950 | 8.71756 | 4 |
| -4 | 4  | 3  | 142.709 | 9.30961 | 4 |
| -3 | -4 | 3  | 244.489 | 20.4131 | 5 |
| -3 | 4  | 3  | 317.066 | 18.7593 | 3 |
| -3 | 4  | 3  | 315.024 | 18.9997 | 4 |
| -3 | 4  | 3  | 321.280 | 18.7686 | 4 |
| -2 | -4 | 3  | 131.959 | 9.68318 | 2 |
| -2 | -4 | 3  | 133.444 | 10.8943 | 5 |
| -2 | 4  | 3  | 149.997 | 9.25988 | 4 |
| -2 | 4  | 3  | 147.201 | 9.32957 | 3 |
| -2 | 4  | 3  | 145.752 | 9.49116 | 4 |
| -2 | 4  | 3  | 142.448 | 9.16722 | 3 |
| -2 | 4  | 3  | 146.531 | 9.48675 | 5 |
| 1  | -4 | -3 | 2411.45 | 150.430 | 2 |
| -1 | -4 | 3  | 2416.47 | 151.034 | 5 |
| -1 | 4  | 3  | 2483.22 | 150.005 | 4 |
| 1  | 4  | -3 | 2487.41 | 149.852 | 4 |
| -1 | 4  | 3  | 2534.15 | 149.812 | 4 |
| -1 | 4  | 3  | 2494.07 | 150.502 | 5 |
| 1  | 4  | -3 | 2473.70 | 150.549 | 5 |
| 1  | 4  | -3 | 2473.89 | 149.814 | 4 |
| -1 | 4  | 3  | 2465.15 | 149.791 | 3 |
| 0  | 4  | -3 | 258.725 | 16.0912 | 4 |
| -1 | -4 | -3 | 542.768 | 31.6604 | 5 |
| -1 | -4 | -3 | 515.458 | 31.4848 | 2 |
| -1 | -4 | -3 | 499.390 | 30.9291 | 4 |
| -1 | 4  | -3 | 471.570 | 30.3171 | 4 |
| 1  | 4  | 3  | 525.575 | 32.0220 | 5 |
| -1 | 4  | -3 | 474.367 | 30.3555 | 3 |
| -1 | 4  | -3 | 467.671 | 30.2870 | 3 |
| -1 | 4  | -3 | 477.882 | 30.2968 | 4 |
| -2 | 4  | -3 | 32.6074 | 2.55971 | 3 |
| -2 | 4  | -3 | 34.6477 | 2.64071 | 3 |
| -2 | 4  | -3 | 37.8160 | 2.47664 | 4 |
| -2 | 4  | -3 | 38.3847 | 2.42386 | 4 |
| -3 | -4 | -3 | 627.560 | 40.0036 | 5 |
| -3 | -4 | -3 | 641.386 | 40.6297 | 2 |
| -3 | -4 | -3 | 597.878 | 40.3834 | 1 |
| -3 | 4  | -3 | 667.560 | 38.8278 | 3 |
| -4 | -4 | -3 | 11.5231 | 3.24349 | 2 |
| -4 | -4 | -3 | 14.7382 | 3.30380 | 1 |
| -5 | -4 | -3 | 490.815 | 31.8622 | 1 |
| -5 | -4 | -3 | 515.413 | 33.3707 | 2 |
| -5 | -4 | -3 | 482.868 | 30.3382 | 8 |
| -5 | 4  | -3 | 478.901 | 30.4180 | 3 |

|    |    |    |         |         |    |
|----|----|----|---------|---------|----|
| -5 | 4  | -3 | 473.315 | 29.6307 | 6  |
| -6 | -4 | -3 | 101.030 | 7.80938 | 10 |
| -6 | -4 | -3 | 103.836 | 7.08442 | 8  |
| -6 | 4  | -3 | 92.9296 | 6.40823 | 8  |
| -6 | 4  | -3 | 95.2604 | 6.23936 | 9  |
| -6 | 4  | -3 | 92.6514 | 6.11290 | 6  |
| -7 | -4 | -3 | 280.309 | 18.0371 | 10 |
| -7 | -4 | -3 | 275.132 | 18.0371 | 10 |
| -7 | -4 | -3 | 286.251 | 17.8385 | 8  |
| -7 | 4  | -3 | 262.526 | 17.1515 | 9  |
| 7  | 4  | 3  | 288.229 | 19.6552 | 13 |
| -7 | 4  | -3 | 271.750 | 16.9842 | 6  |
| -8 | -4 | -3 | 132.541 | 8.87906 | 8  |
| -8 | 4  | -3 | 131.984 | 8.36160 | 9  |
| 8  | 4  | 3  | 123.677 | 10.6838 | 13 |
| -8 | 4  | -3 | 131.869 | 8.11460 | 6  |
| -9 | 4  | -3 | 4.44624 | 0.79373 | 9  |
| 9  | 4  | 3  | 1.32323 | 2.64332 | 13 |
| 10 | 5  | -3 | 7.36106 | 3.00777 | 13 |
| -9 | -5 | 3  | 1.43596 | 2.07062 | 10 |
| -9 | 5  | 3  | 5.76293 | 1.89594 | 7  |
| 9  | 5  | -3 | 1.11091 | 3.42037 | 13 |
| -8 | -5 | 3  | 112.345 | 8.70275 | 10 |
| 8  | 5  | -3 | 111.238 | 10.8320 | 13 |
| -7 | -5 | 3  | 9.24814 | 2.81336 | 10 |
| -7 | -5 | 3  | 8.79439 | 3.89174 | 1  |
| 7  | 5  | -3 | 15.2794 | 4.57108 | 13 |
| -6 | 5  | 3  | 223.473 | 14.2095 | 4  |
| -5 | -5 | 3  | 345.398 | 23.4811 | 1  |
| -5 | -5 | 3  | 336.657 | 22.9965 | 5  |
| -5 | 5  | 3  | 320.509 | 20.5425 | 4  |
| -5 | 5  | 3  | 313.637 | 20.7102 | 4  |
| -5 | 5  | 3  | 328.202 | 20.7943 | 3  |
| -4 | -5 | 3  | 35.6096 | 5.42816 | 1  |
| -4 | -5 | 3  | 40.3408 | 5.15152 | 2  |
| -4 | -5 | 3  | 35.1695 | 5.47565 | 5  |
| -4 | 5  | 3  | 42.1113 | 3.29112 | 4  |
| -4 | 5  | 3  | 37.4186 | 3.52480 | 4  |
| -4 | 5  | 3  | 39.4271 | 3.16578 | 3  |
| -3 | 5  | 3  | 149.428 | 9.90598 | 4  |
| -3 | 5  | 3  | 159.204 | 9.95693 | 3  |
| -3 | 5  | 3  | 152.542 | 10.1374 | 4  |
| -2 | -5 | 3  | 220.344 | 18.4515 | 5  |
| 2  | -5 | -3 | 265.806 | 17.9866 | 2  |
| -2 | 5  | 3  | 285.783 | 17.1590 | 3  |
| -2 | 5  | 3  | 282.075 | 16.7928 | 5  |
| -2 | 5  | 3  | 272.700 | 17.1525 | 4  |
| -2 | 5  | 3  | 284.863 | 16.9627 | 4  |
| -2 | 5  | 3  | 281.256 | 16.9489 | 3  |
| 1  | -5 | -3 | 1498.72 | 92.8803 | 2  |

|    |    |    |         |         |    |
|----|----|----|---------|---------|----|
| -1 | 5  | 3  | 1513.68 | 92.6848 | 5  |
| 1  | 5  | -3 | 1468.84 | 92.1100 | 4  |
| -1 | 5  | 3  | 1550.10 | 92.1095 | 4  |
| -1 | 5  | 3  | 1602.95 | 92.1179 | 3  |
| 1  | 5  | -3 | 1454.52 | 92.6789 | 5  |
| -1 | 5  | 3  | 1511.53 | 92.2937 | 4  |
| 0  | -5 | -3 | 676.795 | 41.3863 | 2  |
| 0  | -5 | -3 | 699.100 | 41.5984 | 5  |
| 0  | 5  | 3  | 717.683 | 41.6704 | 5  |
| 0  | 5  | -3 | 629.209 | 40.3432 | 3  |
| 0  | 5  | 3  | 699.411 | 40.6786 | 4  |
| 0  | 5  | -3 | 605.400 | 40.3625 | 4  |
| 0  | 5  | -3 | 606.084 | 40.3396 | 4  |
| -1 | -5 | -3 | 207.758 | 15.3472 | 2  |
| -1 | -5 | -3 | 213.976 | 15.5206 | 5  |
| -1 | 5  | -3 | 242.724 | 14.2570 | 3  |
| -1 | 5  | -3 | 243.790 | 14.1719 | 4  |
| 1  | 5  | 3  | 213.169 | 15.7856 | 5  |
| -1 | 5  | -3 | 235.222 | 14.1760 | 3  |
| -1 | 5  | -3 | 245.723 | 14.1620 | 4  |
| -2 | -5 | -3 | 348.513 | 21.2057 | 5  |
| -2 | -5 | -3 | 351.623 | 21.0459 | 2  |
| -2 | 5  | -3 | 275.543 | 19.2524 | 3  |
| -2 | 5  | -3 | 285.840 | 19.2158 | 3  |
| -3 | -5 | -3 | 15.4665 | 3.18205 | 2  |
| -3 | -5 | -3 | 12.9647 | 3.31575 | 1  |
| -3 | -5 | -3 | 16.1092 | 3.45552 | 5  |
| -3 | 5  | -3 | 12.7072 | 1.42917 | 3  |
| -3 | 5  | -3 | 12.5753 | 1.40254 | 3  |
| -4 | -5 | -3 | 137.521 | 9.04240 | 5  |
| -4 | -5 | -3 | 139.434 | 11.0721 | 2  |
| -4 | -5 | -3 | 138.566 | 10.6571 | 1  |
| -4 | 5  | -3 | 108.042 | 8.12360 | 3  |
| -4 | 5  | -3 | 113.643 | 8.19132 | 3  |
| -5 | -5 | -3 | 97.9206 | 8.94788 | 1  |
| -5 | -5 | -3 | 97.4985 | 9.78113 | 2  |
| -5 | -5 | -3 | 102.064 | 7.30351 | 8  |
| -5 | 5  | -3 | 99.6398 | 6.22916 | 6  |
| -5 | 5  | -3 | 100.440 | 6.94676 | 3  |
| -6 | -5 | -3 | 91.3130 | 9.37004 | 2  |
| -6 | 5  | -3 | 59.1698 | 4.07948 | 6  |
| -6 | 5  | -3 | 58.6667 | 4.22677 | 9  |
| -7 | -5 | -3 | 38.1120 | 4.52445 | 10 |
| -7 | -5 | -3 | 39.0321 | 4.49263 | 8  |
| -7 | -5 | -3 | 36.1453 | 4.36786 | 10 |
| 7  | 5  | 3  | 37.5159 | 6.03532 | 13 |
| -7 | 5  | -3 | 53.3840 | 3.24319 | 9  |
| -7 | 5  | -3 | 48.1765 | 3.26448 | 9  |
| -8 | -5 | -3 | 38.2817 | 3.65951 | 8  |
| -8 | 5  | -3 | 38.9130 | 2.86687 | 9  |



|    |    |    |         |         |    |
|----|----|----|---------|---------|----|
| 8  | 5  | 3  | 37.3644 | 6.16468 | 13 |
| -8 | 5  | -3 | 38.2668 | 2.56169 | 6  |
| 9  | 5  | 3  | 32.3072 | 4.64695 | 13 |
| -9 | 5  | -3 | 22.6037 | 1.84541 | 9  |
| 10 | 6  | -3 | 0.90280 | 2.61499 | 13 |
| 9  | 6  | -3 | 17.4590 | 4.38085 | 13 |
| -8 | -6 | 3  | 5.93011 | 2.46362 | 10 |
| 8  | 6  | -3 | 8.42908 | 3.89052 | 13 |
| -8 | 6  | 3  | 8.96935 | 2.24179 | 7  |
| -7 | -6 | 3  | 119.288 | 9.32333 | 10 |
| -7 | -6 | 3  | 118.300 | 11.2824 | 1  |
| -7 | 6  | 3  | 118.075 | 7.28953 | 11 |
| 7  | 6  | -3 | 98.1186 | 10.5690 | 13 |
| -7 | 6  | 3  | 121.911 | 8.51228 | 7  |
| -6 | -6 | 3  | 178.994 | 16.3517 | 1  |
| -6 | 6  | 3  | 247.323 | 14.2849 | 3  |
| -5 | -6 | 3  | 72.0399 | 8.07184 | 1  |
| -5 | -6 | 3  | 67.0424 | 7.58700 | 5  |
| -5 | 6  | 3  | 73.2725 | 5.43440 | 3  |
| -5 | 6  | 3  | 75.5789 | 5.30603 | 4  |
| -5 | 6  | 3  | 73.9466 | 5.11631 | 4  |
| -4 | -6 | 3  | 321.166 | 20.6225 | 5  |
| -4 | -6 | 3  | 319.720 | 20.1294 | 1  |
| -4 | 6  | 3  | 252.550 | 17.1190 | 3  |
| -4 | 6  | 3  | 243.668 | 16.9213 | 4  |
| -4 | 6  | 3  | 234.830 | 17.0942 | 4  |
| -3 | -6 | 3  | 55.2011 | 7.91655 | 5  |
| -3 | -6 | 3  | 58.2812 | 5.68833 | 2  |
| -3 | 6  | 3  | 66.7345 | 4.89210 | 4  |
| -3 | 6  | 3  | 71.2866 | 4.62395 | 4  |
| -3 | 6  | 3  | 65.1450 | 4.56830 | 3  |
| -2 | -6 | 3  | 154.033 | 10.1618 | 2  |
| 2  | -6 | -3 | 149.051 | 10.9069 | 2  |
| -2 | 6  | 3  | 146.190 | 9.51063 | 3  |
| -2 | 6  | 3  | 144.780 | 9.53719 | 4  |
| -2 | 6  | 3  | 141.703 | 9.75205 | 4  |
| 1  | -6 | -3 | 93.8176 | 8.15158 | 2  |
| 1  | 6  | -3 | 117.200 | 7.65412 | 5  |
| -1 | 6  | 3  | 96.2201 | 7.31411 | 4  |
| 1  | 6  | -3 | 117.502 | 7.11776 | 4  |
| 1  | 6  | -3 | 125.621 | 7.24271 | 4  |
| -1 | 6  | 3  | 100.634 | 7.04613 | 4  |
| -1 | 6  | 3  | 96.2144 | 7.56658 | 5  |
| -1 | 6  | 3  | 96.3108 | 7.03668 | 3  |
| 0  | -6 | -3 | 699.185 | 49.4159 | 2  |
| 0  | 6  | 3  | 701.385 | 49.4775 | 5  |
| 0  | 6  | -3 | 850.569 | 48.4678 | 3  |
| 0  | 6  | -3 | 856.908 | 48.4804 | 4  |
| 0  | 6  | -3 | 897.598 | 48.5234 | 4  |
| 0  | 6  | -3 | 842.734 | 48.4542 | 4  |

|    |    |    |         |         |    |
|----|----|----|---------|---------|----|
| 0  | 6  | 3  | 709.278 | 48.6842 | 4  |
| -1 | 6  | -3 | 10.4990 | 1.08282 | 4  |
| -1 | 6  | -3 | 11.6851 | 1.20745 | 3  |
| -1 | 6  | -3 | 11.2168 | 1.09001 | 4  |
| -1 | 6  | -3 | 10.4326 | 1.25450 | 3  |
| -2 | -6 | -3 | 1197.91 | 77.4535 | 1  |
| -2 | -6 | -3 | 1214.51 | 77.4748 | 5  |
| -2 | -6 | -3 | 1215.53 | 77.2585 | 2  |
| -2 | 6  | -3 | 1294.34 | 75.5781 | 3  |
| -2 | 6  | -3 | 1302.82 | 75.5191 | 3  |
| -3 | -6 | -3 | 61.9665 | 6.88788 | 2  |
| -3 | -6 | -3 | 64.8980 | 6.74379 | 5  |
| -3 | -6 | -3 | 57.9918 | 6.86587 | 1  |
| -3 | 6  | -3 | 71.5222 | 4.51585 | 3  |
| -3 | 6  | -3 | 71.9761 | 4.44567 | 3  |
| -4 | -6 | -3 | 106.171 | 8.80701 | 5  |
| -4 | -6 | -3 | 101.576 | 9.48461 | 1  |
| -4 | -6 | -3 | 108.646 | 10.0637 | 2  |
| -4 | 6  | -3 | 115.211 | 7.20145 | 3  |
| -4 | 6  | -3 | 115.426 | 7.26051 | 3  |
| -5 | -6 | -3 | 10.4588 | 3.54884 | 1  |
| -5 | -6 | -3 | 10.5765 | 3.83343 | 2  |
| -5 | -6 | -3 | 12.7106 | 2.34200 | 8  |
| -5 | 6  | -3 | 8.96355 | 0.95335 | 6  |
| -5 | 6  | -3 | 10.4924 | 1.65459 | 3  |
| -5 | 6  | -3 | 11.2934 | 1.07652 | 9  |
| -6 | -6 | -3 | 90.5236 | 7.16282 | 10 |
| -6 | -6 | -3 | 76.6638 | 7.85889 | 1  |
| -6 | -6 | -3 | 73.0774 | 6.24637 | 8  |
| -6 | 6  | -3 | 87.3641 | 5.19602 | 6  |
| 6  | 6  | 3  | 73.9217 | 8.65170 | 13 |
| -6 | 6  | -3 | 84.0418 | 5.31951 | 9  |
| -7 | -6 | -3 | 400.148 | 23.7644 | 8  |
| -7 | -6 | -3 | 398.318 | 24.1370 | 10 |
| -7 | -6 | -3 | 384.534 | 24.0101 | 10 |
| -7 | 6  | -3 | 340.702 | 22.8356 | 9  |
| -7 | 6  | -3 | 325.924 | 22.8382 | 9  |
| 7  | 6  | 3  | 393.244 | 25.1204 | 13 |
| -7 | 6  | -3 | 372.890 | 22.7190 | 6  |
| -8 | -6 | -3 | 3.10253 | 1.53737 | 8  |
| -8 | 6  | -3 | 1.48898 | 0.82658 | 9  |
| 8  | 6  | 3  | 2.20156 | 3.29871 | 13 |
| -8 | 6  | -3 | 1.07076 | 0.44577 | 6  |
| 9  | 6  | 3  | 6.97307 | 2.79103 | 13 |
| 10 | 7  | -3 | 10.6759 | 3.26698 | 13 |
| -9 | -7 | 3  | 15.8666 | 3.18635 | 10 |
| -9 | 7  | 3  | 15.9856 | 2.45284 | 7  |
| 9  | 7  | -3 | 17.9415 | 4.27936 | 13 |
| -9 | 7  | 3  | 16.0818 | 1.55107 | 9  |
| -8 | -7 | 3  | -3.5550 | 2.25320 | 10 |

|    |    |    |         |         |    |
|----|----|----|---------|---------|----|
| 8  | 7  | -3 | -4.4887 | 4.68107 | 13 |
| -8 | 7  | 3  | 1.96425 | 1.85952 | 7  |
| -7 | -7 | 3  | 182.145 | 12.6211 | 10 |
| -7 | -7 | 3  | 186.285 | 14.9843 | 1  |
| 7  | 7  | -3 | 174.624 | 13.1599 | 13 |
| -7 | 7  | 3  | 146.357 | 11.5180 | 7  |
| -6 | 7  | 3  | 16.0341 | 2.22023 | 3  |
| -6 | 7  | 3  | 17.3045 | 2.74354 | 7  |
| -5 | -7 | 3  | 69.1066 | 7.66065 | 2  |
| -5 | -7 | 3  | 69.8942 | 8.27388 | 1  |
| -5 | -7 | 3  | 70.6563 | 8.29909 | 5  |
| -5 | 7  | 3  | 79.5269 | 5.20825 | 4  |
| -5 | 7  | 3  | 80.4197 | 5.10952 | 4  |
| -5 | 7  | 3  | 80.2064 | 5.69972 | 3  |
| -4 | -7 | 3  | 216.401 | 17.6565 | 5  |
| -4 | -7 | 3  | 211.531 | 17.3518 | 1  |
| -4 | -7 | 3  | 214.079 | 16.4571 | 2  |
| -4 | 7  | 3  | 246.222 | 14.8477 | 4  |
| -4 | 7  | 3  | 251.752 | 14.6611 | 4  |
| -4 | 7  | 3  | 247.033 | 14.8918 | 3  |
| 3  | -7 | -3 | 22.4819 | 3.91369 | 2  |
| -3 | 7  | 3  | 19.8234 | 2.45646 | 4  |
| -3 | 7  | 3  | 24.4489 | 2.16811 | 3  |
| -3 | 7  | 3  | 21.6601 | 2.13049 | 4  |
| 2  | -7 | -3 | 123.116 | 9.38584 | 2  |
| -2 | 7  | 3  | 121.269 | 8.02569 | 3  |
| -2 | 7  | 3  | 119.238 | 7.97105 | 4  |
| -2 | 7  | 3  | 120.342 | 8.24097 | 4  |
| 1  | -7 | -3 | 114.554 | 8.59431 | 2  |
| 1  | 7  | -3 | 96.8263 | 7.19300 | 4  |
| 1  | 7  | -3 | 94.6282 | 7.45324 | 5  |
| -1 | 7  | 3  | 111.460 | 7.17459 | 4  |
| -1 | 7  | 3  | 115.458 | 7.16455 | 3  |
| 0  | -7 | -3 | 4190.57 | 256.842 | 2  |
| 0  | 7  | 3  | 4189.56 | 255.931 | 4  |
| 0  | 7  | -3 | 4210.08 | 255.583 | 4  |
| 0  | 7  | -3 | 4390.58 | 255.646 | 4  |
| 0  | 7  | 3  | 4236.91 | 256.736 | 5  |
| 0  | 7  | -3 | 4122.76 | 255.597 | 3  |
| -1 | -7 | -3 | 226.434 | 14.5540 | 2  |
| -1 | 7  | -3 | 193.592 | 12.7586 | 3  |
| 1  | 7  | 3  | 216.552 | 14.7731 | 5  |
| -1 | 7  | -3 | 188.503 | 12.6401 | 4  |
| -1 | 7  | -3 | 207.429 | 12.6718 | 4  |
| -2 | -7 | -3 | 91.9577 | 8.04904 | 5  |
| -2 | -7 | -3 | 96.6452 | 8.20312 | 1  |
| -2 | -7 | -3 | 96.2774 | 7.88368 | 2  |
| -2 | 7  | -3 | 87.1144 | 5.73504 | 3  |
| -2 | 7  | -3 | 84.4552 | 5.77430 | 3  |
| -3 | -7 | -3 | 72.7222 | 7.05901 | 5  |

|    |    |    |         |         |    |
|----|----|----|---------|---------|----|
| -3 | -7 | -3 | 73.0134 | 7.23872 | 1  |
| -3 | -7 | -3 | 74.3651 | 7.15578 | 2  |
| -3 | 7  | -3 | 67.9380 | 4.55651 | 3  |
| -3 | 7  | -3 | 69.0436 | 4.62656 | 3  |
| -4 | -7 | -3 | 44.1878 | 6.66898 | 2  |
| -4 | -7 | -3 | 43.6985 | 6.10369 | 1  |
| -4 | -7 | -3 | 47.6330 | 5.84598 | 5  |
| -4 | 7  | -3 | 52.3826 | 3.47449 | 3  |
| -4 | 7  | -3 | 51.6493 | 3.54099 | 3  |
| -5 | -7 | -3 | 7.41191 | 2.14806 | 8  |
| -5 | -7 | -3 | 6.76723 | 3.44706 | 2  |
| -5 | -7 | -3 | 6.30775 | 3.53886 | 1  |
| -5 | 7  | -3 | 4.17942 | 1.81435 | 7  |
| -5 | 7  | -3 | 3.35150 | 0.60405 | 9  |
| -5 | 7  | -3 | 3.57355 | 0.51802 | 6  |
| -5 | 7  | -3 | 3.39101 | 0.47783 | 6  |
| -5 | 7  | -3 | 3.31446 | 0.92822 | 3  |
| -6 | -7 | -3 | 95.5417 | 7.17126 | 8  |
| -6 | -7 | -3 | 107.526 | 8.05790 | 10 |
| -6 | -7 | -3 | 89.0058 | 8.93759 | 1  |
| -6 | 7  | -3 | 90.8592 | 5.93083 | 6  |
| -6 | 7  | -3 | 90.0817 | 6.04778 | 9  |
| 6  | 7  | 3  | 102.423 | 10.2098 | 13 |
| -7 | -7 | -3 | 60.9968 | 5.56593 | 10 |
| -7 | -7 | -3 | 62.1469 | 5.62555 | 8  |
| -7 | -7 | -3 | 59.0434 | 5.72366 | 10 |
| 7  | 7  | 3  | 59.6354 | 7.55249 | 13 |
| -8 | -7 | -3 | 8.31215 | 2.05907 | 8  |
| -8 | 7  | -3 | 11.8420 | 0.94334 | 6  |
| 8  | 7  | 3  | 7.05585 | 3.74999 | 13 |
| -8 | 7  | -3 | 10.1130 | 0.91891 | 6  |
| 9  | 7  | 3  | 5.64262 | 2.64643 | 13 |
| 10 | 8  | -3 | 26.5635 | 4.59515 | 13 |
| -9 | -8 | 3  | 8.36239 | 1.66894 | 8  |
| -9 | -8 | 3  | 8.95023 | 2.40873 | 10 |
| -9 | 8  | 3  | 8.33854 | 0.87313 | 6  |
| 9  | 8  | -3 | 7.78161 | 3.67150 | 13 |
| -9 | 8  | 3  | 8.51846 | 1.13175 | 9  |
| -9 | 8  | 3  | 7.78541 | 1.64383 | 7  |
| -8 | -8 | 3  | 20.1010 | 3.57335 | 10 |
| -8 | 8  | 3  | 28.7361 | 3.60409 | 7  |
| 8  | 8  | -3 | 10.7460 | 4.49359 | 13 |
| -8 | 8  | 3  | 20.9372 | 1.92703 | 9  |
| -7 | -8 | 3  | 51.9328 | 8.71216 | 1  |
| -7 | 8  | 3  | 74.0077 | 4.80028 | 9  |
| -7 | 8  | 3  | 76.7810 | 5.89497 | 7  |
| -6 | -8 | 3  | 25.6463 | 5.56911 | 1  |
| -6 | -8 | 3  | 22.3712 | 4.41584 | 10 |
| -6 | 8  | 3  | 32.8286 | 3.73656 | 7  |
| -6 | 8  | 3  | 29.3190 | 2.44369 | 9  |

|    |    |    |         |         |    |
|----|----|----|---------|---------|----|
| -6 | 8  | 3  | 30.7908 | 2.10568 | 11 |
| -5 | -8 | 3  | 11.9342 | 4.66446 | 5  |
| -5 | -8 | 3  | 15.1747 | 3.81460 | 2  |
| -5 | -8 | 3  | 15.7329 | 4.44675 | 1  |
| -5 | 8  | 3  | 18.8339 | 2.25293 | 3  |
| -4 | -8 | 3  | 77.8945 | 7.90244 | 2  |
| -4 | -8 | 3  | 74.7141 | 8.69122 | 1  |
| 4  | -8 | -3 | 94.8759 | 8.55258 | 2  |
| -4 | 8  | 3  | 97.1158 | 6.00151 | 4  |
| -4 | 8  | 3  | 93.6554 | 6.25620 | 3  |
| -4 | 8  | 3  | 94.0530 | 6.14413 | 4  |
| -3 | -8 | 3  | 154.627 | 12.5707 | 1  |
| 3  | -8 | -3 | 154.360 | 12.2145 | 2  |
| -3 | -8 | 3  | 169.394 | 11.6524 | 2  |
| -3 | 8  | 3  | 155.176 | 10.0951 | 4  |
| -3 | 8  | 3  | 158.528 | 10.2402 | 3  |
| -3 | 8  | 3  | 152.525 | 10.3005 | 4  |
| 2  | -8 | -3 | 103.051 | 8.67098 | 2  |
| -2 | 8  | 3  | 108.769 | 7.51745 | 4  |
| -2 | 8  | 3  | 110.279 | 7.24196 | 3  |
| -2 | 8  | 3  | 104.953 | 7.26870 | 4  |
| 1  | -8 | -3 | 458.003 | 28.4703 | 2  |
| 1  | 8  | -3 | 426.710 | 27.2893 | 5  |
| -1 | 8  | 3  | 440.711 | 27.0851 | 3  |
| -1 | 8  | 3  | 443.536 | 27.1109 | 4  |
| 1  | 8  | -3 | 412.249 | 27.0687 | 4  |
| 0  | -8 | -3 | 304.591 | 21.4810 | 2  |
| 0  | 8  | -3 | 336.939 | 20.1814 | 3  |
| 0  | 8  | -3 | 328.411 | 20.1373 | 4  |
| 0  | 8  | -3 | 330.643 | 20.1435 | 4  |
| 0  | 8  | 3  | 318.983 | 21.0282 | 4  |
| -1 | -8 | -3 | 477.621 | 32.7978 | 2  |
| -1 | 8  | -3 | 519.154 | 31.2043 | 3  |
| -1 | 8  | -3 | 533.395 | 31.0501 | 4  |
| -1 | 8  | -3 | 506.525 | 31.0373 | 4  |
| -2 | -8 | -3 | 221.085 | 16.7694 | 1  |
| -2 | -8 | -3 | 214.171 | 16.6192 | 5  |
| -2 | -8 | -3 | 222.064 | 16.3631 | 2  |
| -2 | 8  | -3 | 243.586 | 14.2578 | 3  |
| -2 | 8  | -3 | 248.411 | 14.3195 | 3  |
| -3 | -8 | -3 | 28.0423 | 5.00800 | 5  |
| -3 | -8 | -3 | 29.9405 | 5.32855 | 1  |
| -3 | -8 | -3 | 29.0112 | 5.01307 | 2  |
| -3 | 8  | -3 | 23.4058 | 1.88039 | 3  |
| -3 | 8  | -3 | 26.0823 | 1.86076 | 3  |
| -4 | -8 | -3 | 27.8303 | 4.86874 | 5  |
| -4 | -8 | -3 | 28.7801 | 5.36176 | 1  |
| -4 | -8 | -3 | 29.1955 | 5.36832 | 2  |
| -4 | 8  | -3 | 32.7625 | 2.34904 | 3  |
| -4 | 8  | -3 | 33.0158 | 2.02791 | 6  |

|    |    |    |         |         |    |
|----|----|----|---------|---------|----|
| -5 | -8 | -3 | 9.95499 | 2.21099 | 8  |
| -5 | -8 | -3 | 7.04056 | 3.81096 | 2  |
| -5 | -8 | -3 | 7.01031 | 3.96017 | 1  |
| -5 | 8  | -3 | 16.3838 | 1.01259 | 6  |
| -5 | 8  | -3 | 13.5701 | 1.02146 | 6  |
| -5 | 8  | -3 | 12.3824 | 2.07997 | 7  |
| -5 | 8  | -3 | 13.1067 | 1.11972 | 9  |
| -6 | -8 | -3 | 15.9925 | 3.26494 | 10 |
| -6 | -8 | -3 | 17.1027 | 4.50417 | 1  |
| -6 | -8 | -3 | 15.4096 | 2.62735 | 8  |
| 6  | 8  | 3  | 16.3004 | 4.91072 | 13 |
| -6 | 8  | -3 | 15.7466 | 2.97953 | 12 |
| -6 | 8  | -3 | 19.2222 | 1.36111 | 6  |
| -6 | 8  | -3 | 19.0296 | 1.55790 | 9  |
| -6 | 8  | -3 | 20.4403 | 1.38566 | 6  |
| 7  | 8  | 3  | 5.38680 | 3.96786 | 13 |
| -7 | 8  | -3 | 7.84536 | 1.03453 | 9  |
| -7 | 8  | -3 | 7.91708 | 0.76160 | 6  |
| -7 | 8  | -3 | 8.08367 | 0.77617 | 6  |
| -8 | -8 | -3 | -1.0790 | 1.66044 | 10 |
| -8 | -8 | -3 | 2.48623 | 1.65035 | 8  |
| -8 | 8  | -3 | 0.99768 | 0.26055 | 6  |
| -8 | 8  | -3 | 0.93585 | 0.25323 | 6  |
| -8 | 8  | -3 | 1.18869 | 0.59991 | 9  |
| 8  | 8  | 3  | -1.5624 | 3.37022 | 13 |
| -8 | 8  | -3 | -1.0564 | 0.61511 | 9  |
| 9  | 8  | 3  | 8.59873 | 2.62582 | 13 |
| -9 | 9  | 3  | 5.81963 | 0.70220 | 6  |
| -9 | 9  | 3  | 6.68404 | 0.92241 | 9  |
| -9 | 9  | 3  | 5.32742 | 1.81257 | 7  |
| -8 | 9  | 3  | 21.1739 | 1.67442 | 6  |
| -8 | 9  | 3  | 23.6651 | 1.96024 | 9  |
| -8 | 9  | 3  | 20.8027 | 3.37676 | 7  |
| -7 | -9 | 3  | 22.9605 | 4.52823 | 10 |
| -7 | -9 | 3  | 29.6554 | 6.14771 | 1  |
| 7  | 9  | -3 | 25.6326 | 5.39156 | 13 |
| -7 | 9  | 3  | 34.8917 | 2.34529 | 6  |
| -7 | 9  | 3  | 36.8469 | 2.58419 | 9  |
| -7 | 9  | 3  | 32.8347 | 3.84950 | 7  |
| -6 | -9 | 3  | 15.7028 | 3.29529 | 10 |
| 6  | -9 | -3 | 8.23860 | 3.85366 | 2  |
| -6 | -9 | 3  | 9.39894 | 4.20119 | 1  |
| -6 | 9  | 3  | 3.36981 | 1.82718 | 7  |
| -5 | -9 | 3  | 35.8306 | 5.36743 | 2  |
| -5 | -9 | 3  | 35.9318 | 6.16884 | 5  |
| 5  | -9 | -3 | 29.2094 | 5.41825 | 2  |
| -5 | -9 | 3  | 40.1996 | 6.51938 | 1  |
| -5 | 9  | 3  | 27.9776 | 2.87950 | 3  |
| -5 | 9  | 3  | 26.7792 | 2.12498 | 6  |
| 4  | -9 | -3 | 26.4461 | 4.85455 | 2  |

|    |    |    |         |         |    |
|----|----|----|---------|---------|----|
| -4 | -9 | 3  | 23.0177 | 4.31403 | 2  |
| -4 | -9 | 3  | 24.7968 | 5.33273 | 1  |
| -4 | 9  | 3  | 28.4155 | 2.66988 | 3  |
| -4 | 9  | 3  | 28.3168 | 2.36113 | 4  |
| -4 | 9  | 3  | 30.1895 | 2.24896 | 4  |
| 3  | -9 | -3 | 103.776 | 9.41017 | 2  |
| -3 | 9  | 3  | 106.584 | 7.21062 | 3  |
| -3 | 9  | 3  | 102.576 | 7.00430 | 4  |
| -3 | 9  | 3  | 109.196 | 7.23968 | 4  |
| 2  | -9 | -3 | 33.3965 | 4.85254 | 2  |
| -2 | 9  | 3  | 34.2075 | 3.06616 | 3  |
| -2 | 9  | 3  | 34.8785 | 3.05837 | 4  |
| 1  | -9 | -3 | 74.3795 | 6.86909 | 2  |
| -1 | 9  | 3  | 70.2635 | 4.90446 | 4  |
| 1  | 9  | -3 | 54.5251 | 4.64437 | 5  |
| -1 | 9  | 3  | 70.1858 | 4.79442 | 3  |
| 1  | 9  | -3 | 55.6941 | 4.77679 | 4  |
| 0  | -9 | -3 | 22.5475 | 4.25937 | 2  |
| 0  | 9  | -3 | 33.2812 | 2.74958 | 4  |
| 0  | 9  | -3 | 36.9273 | 2.90928 | 4  |
| -1 | -9 | -3 | 62.6727 | 6.73736 | 2  |
| -1 | 9  | -3 | 75.5519 | 4.65160 | 4  |
| -1 | 9  | -3 | 73.2167 | 4.86264 | 3  |
| -1 | 9  | -3 | 72.4219 | 4.64482 | 4  |
| -2 | -9 | -3 | 39.0194 | 5.45272 | 2  |
| -2 | -9 | -3 | 39.4848 | 5.35023 | 1  |
| -2 | 9  | -3 | 36.9936 | 2.66062 | 3  |
| -3 | -9 | -3 | 7.08985 | 3.08455 | 1  |
| -3 | -9 | -3 | 7.54756 | 3.38374 | 2  |
| -3 | -9 | -3 | 7.71545 | 3.22486 | 5  |
| -3 | 9  | -3 | 5.66481 | 0.72855 | 3  |
| -4 | -9 | -3 | 120.928 | 10.8977 | 2  |
| -4 | -9 | -3 | 114.696 | 11.1169 | 1  |
| -4 | 9  | -3 | 114.229 | 6.99439 | 6  |
| -4 | 9  | -3 | 116.425 | 7.00965 | 6  |
| -4 | 9  | -3 | 111.176 | 7.14916 | 3  |
| -5 | -9 | -3 | 38.0238 | 5.98796 | 10 |
| -5 | -9 | -3 | 40.5481 | 4.45407 | 8  |
| -5 | -9 | -3 | 43.7959 | 6.75121 | 1  |
| -5 | -9 | -3 | 47.6445 | 7.95550 | 2  |
| -5 | 9  | -3 | 44.1842 | 3.10299 | 9  |
| -5 | 9  | -3 | 47.7951 | 2.93284 | 6  |
| -5 | 9  | -3 | 50.8153 | 3.02970 | 9  |
| -5 | 9  | -3 | 49.6327 | 2.94910 | 6  |
| -5 | 9  | -3 | 46.3080 | 4.22964 | 7  |
| -6 | -9 | -3 | 9.58418 | 3.69905 | 1  |
| -6 | -9 | -3 | 13.7048 | 3.29607 | 10 |
| -6 | -9 | -3 | 13.5491 | 2.61017 | 8  |
| 6  | 9  | 3  | 11.6564 | 4.88471 | 13 |
| -6 | 9  | -3 | 8.53029 | 2.12018 | 7  |

|    |     |    |         |         |    |
|----|-----|----|---------|---------|----|
| -6 | 9   | -3 | 18.7796 | 3.11507 | 12 |
| -6 | 9   | -3 | 9.92450 | 1.13613 | 9  |
| -6 | 9   | -3 | 11.6757 | 1.14178 | 9  |
| -6 | 9   | -3 | 8.00274 | 0.83380 | 6  |
| -6 | 9   | -3 | 9.44791 | 0.91891 | 6  |
| -7 | -9  | -3 | 0.57708 | 1.98444 | 8  |
| -7 | -9  | -3 | -0.6988 | 2.49894 | 10 |
| 7  | 9   | 3  | -2.7206 | 3.53803 | 13 |
| -8 | -9  | -3 | 23.4645 | 2.95350 | 10 |
| -8 | -9  | -3 | 20.3506 | 3.10256 | 8  |
| 8  | 9   | 3  | 23.9889 | 4.33223 | 13 |
| -9 | -10 | 3  | 6.50974 | 2.34591 | 10 |
| -9 | -10 | 3  | 3.80809 | 1.80455 | 8  |
| -9 | 10  | 3  | 3.89354 | 0.54707 | 6  |
| -9 | 10  | 3  | 4.42855 | 0.74899 | 9  |
| -9 | 10  | 3  | 4.62558 | 1.73462 | 7  |
| 9  | 10  | -3 | 4.58357 | 3.06174 | 13 |
| -8 | -10 | 3  | 20.5910 | 3.48244 | 10 |
| -8 | 10  | 3  | 20.9367 | 3.45320 | 7  |
| 8  | 10  | -3 | 21.5543 | 4.50997 | 13 |
| -8 | 10  | 3  | 22.5244 | 1.90186 | 9  |
| -8 | 10  | 3  | 24.8304 | 1.71482 | 6  |
| -7 | -10 | 3  | 16.1345 | 5.76050 | 1  |
| -7 | -10 | 3  | 13.2475 | 3.32221 | 10 |
| 7  | 10  | -3 | 14.2649 | 4.01118 | 13 |
| -7 | 10  | 3  | 15.7809 | 2.64052 | 7  |
| -7 | 10  | 3  | 16.4656 | 1.80048 | 9  |
| -7 | 10  | 3  | 17.5208 | 1.44412 | 6  |
| -6 | -10 | 3  | 29.8140 | 4.84310 | 10 |
| 6  | -10 | -3 | 31.8793 | 6.20225 | 2  |
| -6 | -10 | 3  | 33.3577 | 6.92985 | 1  |
| 6  | 10  | -3 | 30.8818 | 5.74706 | 13 |
| -6 | 10  | 3  | 30.2114 | 3.61351 | 7  |
| -6 | 10  | 3  | 30.4678 | 2.21578 | 6  |
| -6 | 10  | 3  | 32.6968 | 2.47223 | 9  |
| -5 | -10 | 3  | 10.0270 | 4.21570 | 1  |
| 5  | -10 | -3 | 8.77694 | 3.68655 | 2  |
| -5 | 10  | 3  | 11.7112 | 1.11699 | 6  |
| -5 | 10  | 3  | 9.62373 | 1.67937 | 3  |
| -5 | 10  | 3  | 15.0062 | 2.20743 | 7  |
| 4  | -10 | -3 | 31.3031 | 5.19845 | 2  |
| -4 | -10 | 3  | 24.5638 | 5.35851 | 1  |
| -4 | 10  | 3  | 30.5486 | 2.08743 | 4  |
| -4 | 10  | 3  | 28.4735 | 2.09134 | 4  |
| -4 | 10  | 3  | 28.3013 | 2.76722 | 3  |
| 3  | -10 | -3 | 19.1626 | 4.13676 | 2  |
| -3 | 10  | 3  | 18.9583 | 2.15507 | 4  |
| -3 | 10  | 3  | 16.8021 | 1.85512 | 4  |
| -3 | 10  | 3  | 19.0653 | 2.06821 | 3  |
| 2  | -10 | -3 | 161.895 | 12.6315 | 2  |



|    |     |    |         |         |    |
|----|-----|----|---------|---------|----|
| -2 | 10  | 3  | 161.486 | 10.7569 | 3  |
| -2 | 10  | 3  | 167.117 | 10.7005 | 4  |
| 1  | -10 | -3 | 23.6470 | 4.54278 | 2  |
| -1 | 10  | 3  | 26.2594 | 2.81269 | 4  |
| 1  | 10  | -3 | 35.6237 | 2.90451 | 4  |
| 0  | -10 | -3 | 1042.68 | 63.9330 | 2  |
| 0  | 10  | -3 | 1017.20 | 62.0863 | 4  |
| 0  | 10  | -3 | 993.943 | 62.0502 | 4  |
| -1 | -10 | -3 | 84.1271 | 8.15239 | 2  |
| -1 | 10  | -3 | 82.1376 | 5.28125 | 4  |
| -1 | 10  | -3 | 83.3250 | 5.58972 | 3  |
| -1 | 10  | -3 | 83.2562 | 5.27943 | 4  |
| -2 | -10 | -3 | 181.586 | 13.0703 | 2  |
| -2 | -10 | -3 | 174.089 | 13.3895 | 1  |
| -2 | 10  | -3 | 146.411 | 10.2629 | 3  |
| -3 | -10 | -3 | 178.872 | 14.6816 | 1  |
| -3 | -10 | -3 | 179.430 | 14.4575 | 2  |
| -3 | 10  | -3 | 188.821 | 11.3016 | 3  |
| -4 | -10 | -3 | 14.4029 | 4.26936 | 1  |
| -4 | 10  | -3 | 4.71681 | 1.88624 | 7  |
| -4 | 10  | -3 | 4.97378 | 0.44136 | 6  |
| -4 | 10  | -3 | 4.87240 | 0.45153 | 6  |
| -5 | -10 | -3 | 106.034 | 11.1909 | 1  |
| -5 | -10 | -3 | 104.671 | 11.0427 | 2  |
| -5 | -10 | -3 | 97.8396 | 8.69058 | 10 |
| -5 | 10  | -3 | 110.594 | 6.44775 | 6  |
| -5 | 10  | -3 | 109.382 | 6.44123 | 6  |
| -5 | 10  | -3 | 101.665 | 8.34465 | 12 |
| -5 | 10  | -3 | 102.926 | 6.50583 | 9  |
| -5 | 10  | -3 | 109.691 | 6.55625 | 9  |
| -5 | 10  | -3 | 99.4938 | 7.59716 | 7  |
| -6 | -10 | -3 | 29.5398 | 5.93814 | 1  |
| -6 | -10 | -3 | 28.0128 | 4.51608 | 10 |
| -6 | -10 | -3 | 29.1751 | 3.79576 | 8  |
| -6 | 10  | -3 | 25.0432 | 1.91923 | 9  |
| -6 | 10  | -3 | 25.1268 | 1.66628 | 6  |
| -6 | 10  | -3 | 24.7787 | 3.38108 | 7  |
| -6 | 10  | -3 | 27.6230 | 4.07006 | 12 |
| -6 | 10  | -3 | 23.9844 | 1.86456 | 9  |
| 6  | 10  | 3  | 27.1777 | 5.45908 | 13 |
| -6 | 10  | -3 | 25.4296 | 1.65653 | 6  |
| -7 | -10 | -3 | 59.3764 | 4.95230 | 8  |
| -7 | -10 | -3 | 58.5053 | 5.38511 | 10 |
| -7 | -10 | -3 | 51.9968 | 5.53752 | 10 |
| -7 | 10  | -3 | 48.8185 | 3.21159 | 9  |
| -7 | 10  | -3 | 41.3999 | 3.18241 | 9  |
| -7 | 10  | -3 | 47.5604 | 6.81917 | 12 |
| 7  | 10  | 3  | 56.4879 | 7.17983 | 13 |
| -8 | -10 | -3 | 51.5268 | 4.60891 | 8  |
| -8 | -10 | -3 | 50.9278 | 4.50581 | 10 |

|    |     |    |         |         |    |
|----|-----|----|---------|---------|----|
| 8  | 10  | 3  | 51.4919 | 6.43112 | 13 |
| -9 | -11 | 3  | 28.2485 | 3.77481 | 10 |
| -9 | -11 | 3  | 29.3014 | 4.00754 | 8  |
| -9 | 11  | 3  | 30.7611 | 1.99790 | 6  |
| -9 | 11  | 3  | 31.6472 | 2.15412 | 9  |
| -9 | 11  | 3  | 31.0807 | 3.32064 | 7  |
| 9  | 11  | -3 | 25.0743 | 4.64306 | 13 |
| -8 | -11 | 3  | 1.23357 | 2.56043 | 10 |
| -8 | 11  | 3  | 2.11059 | 0.76843 | 9  |
| -8 | 11  | 3  | 2.27358 | 1.90707 | 7  |
| 8  | 11  | -3 | 2.25755 | 3.44302 | 13 |
| -8 | 11  | 3  | 2.75118 | 0.58145 | 6  |
| -7 | -11 | 3  | 77.4565 | 10.2977 | 1  |
| -7 | -11 | 3  | 76.5385 | 7.11629 | 10 |
| -7 | 11  | 3  | 67.7263 | 5.88707 | 7  |
| 7  | 11  | -3 | 78.7492 | 8.55415 | 13 |
| -7 | 11  | 3  | 67.6943 | 4.77664 | 9  |
| -7 | 11  | 3  | 67.0481 | 4.54287 | 6  |
| -6 | -11 | 3  | 127.144 | 12.8309 | 1  |
| -6 | -11 | 3  | 104.763 | 9.12884 | 10 |
| -6 | 11  | 3  | 104.404 | 6.86269 | 9  |
| 6  | 11  | -3 | 102.558 | 10.0522 | 13 |
| -6 | 11  | 3  | 104.872 | 7.83520 | 7  |
| -6 | 11  | 3  | 102.030 | 6.61591 | 6  |
| 5  | -11 | -3 | 14.3989 | 4.18989 | 2  |
| -5 | -11 | 3  | 9.37942 | 4.33262 | 1  |
| -5 | 11  | 3  | 12.5381 | 1.62807 | 9  |
| -5 | 11  | 3  | 12.8111 | 2.22552 | 7  |
| -5 | 11  | 3  | 12.4910 | 1.18805 | 6  |
| -5 | 11  | 3  | 12.5257 | 1.97787 | 3  |
| 4  | -11 | -3 | 174.723 | 13.8800 | 2  |
| -4 | -11 | 3  | 163.246 | 14.8491 | 1  |
| -4 | 11  | 3  | 170.581 | 11.1977 | 3  |
| 3  | -11 | -3 | 0.83987 | 2.87282 | 2  |
| -3 | 11  | 3  | 0.95489 | 0.99579 | 3  |
| -3 | 11  | 3  | -0.2605 | 0.88123 | 4  |
| -3 | 11  | 3  | 0.77815 | 0.81920 | 4  |
| 2  | -11 | -3 | 198.767 | 15.0977 | 2  |
| -2 | 11  | 3  | 201.873 | 12.9949 | 4  |
| -2 | 11  | 3  | 203.341 | 13.1465 | 3  |
| 1  | -11 | -3 | 646.223 | 40.2999 | 2  |
| -1 | 11  | 3  | 616.065 | 38.5065 | 4  |
| 1  | 11  | -3 | 603.905 | 38.4821 | 4  |
| 0  | -11 | -3 | 61.4153 | 7.36825 | 2  |
| 0  | 11  | -3 | 79.5403 | 5.41710 | 4  |
| 0  | 11  | -3 | 84.7369 | 5.48095 | 4  |
| -1 | -11 | -3 | 15.4858 | 4.02261 | 2  |
| -1 | 11  | -3 | 22.2092 | 1.63341 | 4  |
| -1 | 11  | -3 | 22.6121 | 1.62960 | 4  |
| -2 | -11 | -3 | 153.460 | 12.9376 | 1  |

|    |     |    |         |         |    |
|----|-----|----|---------|---------|----|
| -2 | -11 | -3 | 161.958 | 13.0136 | 2  |
| -2 | 11  | -3 | 164.329 | 10.1378 | 3  |
| -3 | -11 | -3 | 66.8977 | 7.75635 | 1  |
| -3 | -11 | -3 | 72.1512 | 7.89971 | 2  |
| -3 | 11  | -3 | 53.7233 | 3.57123 | 6  |
| -3 | 11  | -3 | 57.0256 | 3.76028 | 3  |
| -4 | -11 | -3 | 75.5840 | 8.83837 | 2  |
| -4 | -11 | -3 | 69.9402 | 9.07589 | 1  |
| -4 | 11  | -3 | 65.4435 | 4.10702 | 6  |
| -4 | 11  | -3 | 69.8375 | 4.14057 | 9  |
| -4 | 11  | -3 | 63.7757 | 4.14595 | 9  |
| -4 | 11  | -3 | 69.3488 | 4.09936 | 6  |
| -4 | 11  | -3 | 63.5395 | 5.29538 | 7  |
| -5 | -11 | -3 | 2.72392 | 4.21466 | 1  |
| -5 | -11 | -3 | 3.47349 | 2.86905 | 10 |
| -5 | 11  | -3 | 3.66495 | 0.51415 | 9  |
| 5  | 11  | 3  | 1.84965 | 4.42066 | 13 |
| -5 | 11  | -3 | 0.31972 | 2.59831 | 12 |
| -5 | 11  | -3 | 5.47753 | 1.86471 | 7  |
| -6 | -11 | -3 | 22.9422 | 3.89587 | 10 |
| -6 | -11 | -3 | 24.1036 | 3.43300 | 8  |
| -6 | -11 | -3 | 24.6537 | 5.81731 | 1  |
| 6  | 11  | 3  | 20.5561 | 4.25488 | 13 |
| -6 | 11  | -3 | 12.9581 | 1.13403 | 9  |
| -6 | 11  | -3 | 17.0828 | 3.18237 | 12 |
| -6 | 11  | -3 | 13.7259 | 1.18491 | 9  |
| -7 | -11 | -3 | 16.4188 | 3.20445 | 10 |
| -7 | -11 | -3 | 11.2951 | 2.62969 | 8  |
| -7 | -11 | -3 | 23.6563 | 4.25740 | 10 |
| -7 | 11  | -3 | 15.0424 | 3.10584 | 12 |
| -8 | -11 | -3 | -0.3297 | 1.53534 | 10 |
| -8 | -11 | -3 | -0.1006 | 1.59463 | 8  |
| 8  | 11  | 3  | 0.34432 | 2.74660 | 13 |
| -9 | -12 | 3  | 5.54906 | 2.30846 | 10 |
| -9 | 12  | 3  | 7.03019 | 0.76295 | 9  |
| -9 | 12  | 3  | 4.75091 | 1.61722 | 7  |
| -9 | 12  | 3  | 7.58061 | 0.91293 | 9  |
| -8 | -12 | 3  | 27.9901 | 4.73612 | 10 |
| -8 | 12  | 3  | 28.1063 | 3.19053 | 7  |
| -8 | 12  | 3  | 31.4037 | 2.08974 | 6  |
| 8  | 12  | -3 | 44.4339 | 8.22172 | 13 |
| -8 | 12  | 3  | 30.6673 | 2.27867 | 9  |
| -7 | -12 | 3  | 2.33074 | 3.86624 | 1  |
| -7 | -12 | 3  | 3.10648 | 2.71730 | 10 |
| -7 | 12  | 3  | 1.82087 | 0.58410 | 6  |
| 7  | 12  | -3 | 0.73920 | 4.06720 | 13 |
| -7 | 12  | 3  | 0.83605 | 1.94306 | 7  |
| -7 | 12  | 3  | 1.63808 | 0.67292 | 9  |
| -6 | -12 | 3  | 119.336 | 13.5924 | 1  |
| -6 | 12  | 3  | 141.611 | 8.95599 | 9  |

|    |     |    |         |         |    |
|----|-----|----|---------|---------|----|
| -6 | 12  | 3  | 146.960 | 9.92435 | 7  |
| -6 | 12  | 3  | 144.460 | 8.71169 | 6  |
| 5  | -12 | -3 | 267.183 | 20.2055 | 2  |
| -5 | -12 | 3  | 265.689 | 21.0698 | 1  |
| -5 | 12  | 3  | 270.297 | 16.0434 | 6  |
| -5 | 12  | 3  | 251.230 | 16.2652 | 9  |
| -5 | 12  | 3  | 257.810 | 16.9484 | 7  |
| 4  | -12 | -3 | 218.717 | 17.2209 | 2  |
| -4 | 12  | 3  | 225.556 | 14.4419 | 3  |
| -4 | 12  | 3  | 222.033 | 13.6420 | 6  |
| 3  | -12 | -3 | 92.5215 | 9.08340 | 2  |
| -3 | 12  | 3  | 92.5015 | 6.29359 | 4  |
| -3 | 12  | 3  | 92.9590 | 6.60686 | 3  |
| -3 | 12  | 3  | 91.5254 | 6.18887 | 4  |
| 2  | -12 | -3 | 131.343 | 11.1973 | 2  |
| -2 | 12  | 3  | 132.526 | 9.14215 | 3  |
| -2 | 12  | 3  | 134.604 | 8.92706 | 4  |
| 1  | -12 | -3 | 36.5683 | 5.45721 | 2  |
| 1  | 12  | -3 | 28.2298 | 3.29889 | 4  |
| -1 | 12  | 3  | 44.0049 | 3.63974 | 4  |
| 0  | 12  | -3 | 113.902 | 7.68753 | 4  |
| -1 | -12 | -3 | 221.872 | 15.6687 | 2  |
| -1 | 12  | -3 | 194.182 | 12.2942 | 4  |
| -1 | 12  | -3 | 195.296 | 12.2948 | 4  |
| -2 | 12  | -3 | 38.5585 | 2.89265 | 3  |
| -3 | -12 | -3 | 243.783 | 18.6624 | 1  |
| -3 | -12 | -3 | 238.327 | 18.3284 | 2  |
| -3 | 12  | -3 | 216.899 | 14.2167 | 6  |
| -3 | 12  | -3 | 243.190 | 14.2175 | 6  |
| -3 | 12  | -3 | 234.028 | 14.4048 | 3  |
| -4 | -12 | -3 | 67.5664 | 8.68013 | 1  |
| -4 | -12 | -3 | 74.0016 | 8.45053 | 2  |
| -4 | 12  | -3 | 59.5234 | 3.88321 | 9  |
| -5 | -12 | -3 | 65.6729 | 6.72237 | 10 |
| -5 | -12 | -3 | 67.2013 | 8.98183 | 1  |
| 5  | 12  | 3  | 62.0348 | 7.28016 | 13 |
| -6 | -12 | -3 | 7.73351 | 3.23134 | 10 |
| -6 | -12 | -3 | 9.18421 | 4.30406 | 1  |
| -6 | 12  | -3 | 8.13088 | 2.80477 | 12 |
| 6  | 12  | 3  | 6.44802 | 3.58742 | 13 |
| -7 | -12 | -3 | 27.2504 | 3.64099 | 8  |
| -7 | -12 | -3 | 22.7829 | 4.20708 | 10 |
| -7 | -12 | -3 | 23.3648 | 3.96337 | 10 |
| 7  | 12  | 3  | 20.5469 | 4.26578 | 13 |
| -7 | 12  | -3 | 25.3067 | 3.46854 | 12 |
| -8 | -12 | -3 | 16.5634 | 3.03100 | 10 |
| 8  | 12  | 3  | 15.1599 | 3.15880 | 13 |
| -9 | -13 | 3  | 2.91591 | 2.00700 | 10 |
| -8 | -13 | 3  | 17.1680 | 3.57989 | 10 |
| -8 | 13  | 3  | 19.0814 | 1.41843 | 6  |

|    |     |    |         |         |    |
|----|-----|----|---------|---------|----|
| -8 | 13  | 3  | 21.5920 | 3.22791 | 7  |
| -8 | 13  | 3  | 18.8988 | 1.39636 | 6  |
| -8 | 13  | 3  | 20.9894 | 1.61579 | 9  |
| -7 | -13 | 3  | 75.3784 | 7.38853 | 10 |
| -7 | -13 | 3  | 74.9505 | 9.80036 | 1  |
| -7 | 13  | 3  | 69.8022 | 4.55309 | 6  |
| -7 | 13  | 3  | 69.6043 | 4.77006 | 9  |
| -7 | 13  | 3  | 71.8563 | 6.07406 | 7  |
| -6 | -13 | 3  | 31.7061 | 7.12759 | 1  |
| -6 | -13 | 3  | 26.9533 | 5.13623 | 10 |
| -6 | 13  | 3  | 42.0522 | 4.61508 | 7  |
| -6 | 13  | 3  | 40.8702 | 2.62269 | 6  |
| -6 | 13  | 3  | 40.3765 | 2.88975 | 9  |
| 5  | -13 | -3 | 18.5509 | 4.73986 | 2  |
| -5 | -13 | 3  | 21.1342 | 5.72723 | 1  |
| -5 | 13  | 3  | 16.4416 | 1.45570 | 6  |
| -5 | 13  | 3  | 14.6468 | 1.89704 | 9  |
| -5 | 13  | 3  | 19.4199 | 2.90453 | 7  |
| 5  | 13  | -3 | 29.5568 | 5.42712 | 10 |
| 4  | -13 | -3 | 49.3597 | 6.98061 | 2  |
| -4 | 13  | 3  | 45.1411 | 4.13077 | 7  |
| -4 | 13  | 3  | 47.3474 | 4.00221 | 3  |
| -4 | 13  | 3  | 47.1901 | 3.13688 | 6  |
| 3  | -13 | -3 | 71.4425 | 7.88406 | 2  |
| -3 | 13  | 3  | 67.6759 | 4.65677 | 4  |
| -3 | 13  | 3  | 67.0310 | 5.21314 | 3  |
| -3 | 13  | 3  | 63.1794 | 4.56486 | 4  |
| 2  | -13 | -3 | 97.3820 | 9.26193 | 2  |
| -2 | 13  | 3  | 95.0054 | 6.72517 | 4  |
| 1  | -13 | -3 | 657.532 | 41.6954 | 2  |
| -1 | 13  | 3  | 661.435 | 39.4311 | 4  |
| 1  | 13  | -3 | 583.114 | 39.3344 | 4  |
| 0  | -13 | -3 | 19.5758 | 4.49693 | 2  |
| 0  | 13  | -3 | 30.9583 | 2.79797 | 4  |
| -1 | -13 | -3 | 96.3064 | 9.10027 | 2  |
| -2 | -13 | -3 | 29.4969 | 5.42505 | 2  |
| -2 | 13  | -3 | 27.0620 | 2.28681 | 3  |
| -3 | -13 | -3 | 25.2090 | 5.21498 | 2  |
| -3 | -13 | -3 | 23.4512 | 5.48729 | 1  |
| -3 | 13  | -3 | 16.4042 | 1.39906 | 3  |
| -3 | 13  | -3 | 18.0104 | 1.16971 | 6  |
| -3 | 13  | -3 | 16.6755 | 1.44118 | 3  |
| -3 | 13  | -3 | 16.0503 | 1.20442 | 6  |
| -4 | -13 | -3 | 12.7085 | 3.54456 | 10 |
| -4 | -13 | -3 | 15.5130 | 4.68917 | 2  |
| -4 | -13 | -3 | 13.0273 | 4.75740 | 1  |
| -4 | 13  | -3 | 17.1461 | 1.16037 | 9  |
| -4 | 13  | -3 | 22.1380 | 3.88582 | 12 |
| -4 | 13  | -3 | 17.0600 | 1.19673 | 9  |
| -5 | -13 | -3 | 611.163 | 39.6863 | 10 |

|    |     |    |         |         |    |
|----|-----|----|---------|---------|----|
| -5 | -13 | -3 | 637.018 | 42.8730 | 1  |
| -5 | 13  | -3 | 626.731 | 39.0262 | 12 |
| 5  | 13  | 3  | 605.038 | 39.5969 | 13 |
| -6 | -13 | -3 | 16.5958 | 5.68160 | 1  |
| -6 | 13  | -3 | 26.4928 | 3.95688 | 12 |
| -7 | -13 | -3 | 25.5908 | 4.40005 | 10 |
| -7 | -13 | -3 | 23.2993 | 4.14368 | 10 |
| 7  | 13  | 3  | 14.7299 | 3.99937 | 13 |
| -7 | 13  | -3 | 27.0120 | 4.25878 | 12 |
| -8 | -13 | -3 | 4.62908 | 2.02940 | 10 |
| 8  | 13  | 3  | 7.30580 | 2.36399 | 13 |
| -9 | -14 | 3  | 28.9981 | 3.40668 | 10 |
| -8 | -14 | 3  | 4.90506 | 2.94370 | 10 |
| -8 | 14  | 3  | 8.22620 | 2.10026 | 7  |
| -8 | 14  | 3  | 9.79295 | 0.75922 | 6  |
| -8 | 14  | 3  | 9.02555 | 1.03545 | 9  |
| -8 | 14  | 3  | 11.1626 | 0.78053 | 6  |
| -7 | -14 | 3  | 3.07514 | 2.88915 | 10 |
| -7 | 14  | 3  | 5.47240 | 0.65872 | 6  |
| -7 | 14  | 3  | 4.90344 | 2.11557 | 7  |
| -7 | 14  | 3  | 4.79303 | 0.87255 | 9  |
| -6 | -14 | 3  | 24.3718 | 4.62623 | 10 |
| -6 | -14 | 3  | 28.4323 | 6.58731 | 1  |
| -6 | 14  | 3  | 18.3859 | 1.98538 | 9  |
| -6 | 14  | 3  | 18.6082 | 1.56712 | 6  |
| -6 | 14  | 3  | 19.1294 | 2.88299 | 7  |
| 5  | -14 | -3 | 23.7063 | 5.76910 | 2  |
| -5 | -14 | 3  | 23.2840 | 6.22913 | 1  |
| -5 | 14  | 3  | 21.5920 | 3.18648 | 7  |
| -5 | 14  | 3  | 18.6584 | 2.13043 | 9  |
| 5  | 14  | -3 | 30.4290 | 5.04285 | 10 |
| -5 | 14  | 3  | 20.8948 | 1.72147 | 6  |
| 4  | -14 | -3 | 135.754 | 12.3161 | 2  |
| -4 | 14  | 3  | 127.180 | 8.97943 | 7  |
| -4 | 14  | 3  | 129.967 | 8.48391 | 9  |
| -4 | 14  | 3  | 129.183 | 8.97129 | 3  |
| -4 | 14  | 3  | 131.772 | 8.13784 | 6  |
| 3  | -14 | -3 | 42.6077 | 6.53631 | 2  |
| -3 | 14  | 3  | 42.3746 | 3.73249 | 3  |
| -3 | 14  | 3  | 35.2372 | 2.77086 | 4  |
| -3 | 14  | 3  | 38.0021 | 2.85048 | 4  |
| 2  | -14 | -3 | 1.69952 | 2.93430 | 2  |
| -2 | 14  | 3  | 3.33222 | 1.27232 | 4  |
| 1  | -14 | -3 | 109.439 | 10.3926 | 2  |
| 1  | 14  | -3 | 86.7418 | 7.33293 | 4  |
| -1 | 14  | 3  | 110.649 | 7.43060 | 4  |
| 0  | -14 | -3 | 333.038 | 24.3404 | 2  |
| 0  | 14  | -3 | 357.588 | 21.7913 | 4  |
| -1 | -14 | -3 | 53.9761 | 6.86033 | 2  |
| -2 | -14 | -3 | 114.053 | 11.2119 | 2  |

|    |     |    |         |         |    |
|----|-----|----|---------|---------|----|
| -2 | 14  | -3 | 134.683 | 7.83588 | 6  |
| -3 | -14 | -3 | 15.3243 | 4.45587 | 2  |
| -3 | -14 | -3 | 15.7711 | 5.01467 | 1  |
| -3 | 14  | -3 | 12.7124 | 1.28937 | 9  |
| -3 | 14  | -3 | 13.3017 | 1.06307 | 6  |
| -3 | 14  | -3 | 13.2565 | 1.11620 | 9  |
| -3 | 14  | -3 | 14.2086 | 1.27166 | 3  |
| -3 | 14  | -3 | 16.3640 | 1.81373 | 3  |
| -3 | 14  | -3 | 13.1831 | 0.98525 | 6  |
| -4 | -14 | -3 | 10.5764 | 4.71246 | 1  |
| -4 | 14  | -3 | 14.9605 | 1.09816 | 9  |
| -4 | 14  | -3 | 12.7447 | 3.80231 | 12 |
| -4 | 14  | -3 | 12.5308 | 0.99493 | 9  |
| -5 | -14 | -3 | 2.43752 | 3.93391 | 1  |
| -5 | -14 | -3 | 2.10259 | 2.90807 | 10 |
| -5 | 14  | -3 | -1.1553 | 2.55174 | 12 |
| -6 | -14 | -3 | 74.1596 | 7.23002 | 10 |
| -6 | 14  | -3 | 68.4924 | 6.81903 | 12 |
| -7 | -14 | -3 | 11.7957 | 2.62051 | 10 |
| -7 | -14 | -3 | 12.5756 | 2.42850 | 10 |
| -7 | 14  | -3 | 12.0635 | 2.78230 | 12 |
| -8 | -14 | -3 | 20.5355 | 2.64745 | 10 |
| -8 | -15 | 3  | 17.7654 | 2.96907 | 10 |
| -8 | 15  | 3  | 11.7256 | 2.21000 | 7  |
| -8 | 15  | 3  | 10.1544 | 0.92144 | 9  |
| -8 | 15  | 3  | 10.7490 | 0.92181 | 9  |
| -7 | -15 | 3  | 3.41996 | 2.86480 | 10 |
| -7 | 15  | 3  | -0.3299 | 1.93026 | 7  |
| -7 | 15  | 3  | 2.39951 | 0.69941 | 9  |
| -7 | 15  | 3  | 2.10491 | 0.44194 | 6  |
| -7 | 15  | 3  | 2.12262 | 0.51864 | 6  |
| -6 | -15 | 3  | 86.1802 | 10.8160 | 1  |
| -6 | 15  | 3  | 72.7054 | 4.95561 | 9  |
| -6 | 15  | 3  | 69.0240 | 5.99944 | 7  |
| -6 | 15  | 3  | 71.7899 | 4.65466 | 6  |
| -5 | 15  | 3  | 96.7812 | 6.08236 | 6  |
| -5 | 15  | 3  | 94.9321 | 6.40903 | 9  |
| -5 | 15  | 3  | 96.9613 | 7.44391 | 7  |
| 4  | -15 | -3 | 13.4030 | 4.93299 | 2  |
| -4 | 15  | 3  | 13.5321 | 1.71076 | 9  |
| -4 | 15  | 3  | 14.4795 | 1.36458 | 6  |
| -4 | 15  | 3  | 13.0405 | 2.20788 | 7  |
| 4  | 15  | -3 | 14.2395 | 3.90007 | 10 |
| 3  | -15 | -3 | 24.6276 | 5.53152 | 2  |
| -3 | 15  | 3  | 22.3500 | 2.86806 | 3  |
| 2  | -15 | -3 | 367.621 | 25.8954 | 2  |
| -2 | 15  | 3  | 353.961 | 22.6581 | 4  |
| 1  | -15 | -3 | 6.73884 | 3.65591 | 2  |
| -1 | 15  | 3  | 6.84667 | 1.74870 | 4  |
| 0  | -15 | -3 | 34.1222 | 5.90808 | 2  |

|    |     |    |         |         |    |
|----|-----|----|---------|---------|----|
| 0  | 15  | -3 | 28.2553 | 2.96837 | 4  |
| -1 | -15 | -3 | 139.799 | 12.2279 | 2  |
| -1 | 15  | -3 | 136.466 | 8.51574 | 6  |
| -2 | -15 | -3 | 74.3871 | 8.15870 | 2  |
| -2 | 15  | -3 | 62.5270 | 4.37697 | 9  |
| -2 | 15  | -3 | 63.2852 | 4.01800 | 6  |
| -2 | 15  | -3 | 60.6576 | 4.66009 | 3  |
| -3 | -15 | -3 | 23.1173 | 5.32398 | 2  |
| 3  | 15  | 3  | 16.8423 | 4.62632 | 10 |
| -3 | 15  | -3 | 29.9984 | 1.78282 | 6  |
| -4 | -15 | -3 | 22.4242 | 6.00580 | 1  |
| -4 | 15  | -3 | 22.0154 | 4.00236 | 12 |
| -4 | 15  | -3 | 24.2129 | 3.51761 | 14 |
| -4 | 15  | -3 | 21.8771 | 1.51763 | 9  |
| -4 | 15  | -3 | 22.5508 | 1.58384 | 9  |
| -5 | -15 | -3 | 15.2156 | 3.88301 | 10 |
| -5 | -15 | -3 | 19.1477 | 5.64705 | 1  |
| -5 | 15  | -3 | 12.2028 | 3.29536 | 12 |
| -6 | -15 | -3 | 119.089 | 10.2563 | 10 |
| -6 | 15  | -3 | 156.508 | 10.4944 | 12 |
| -7 | -15 | -3 | 9.46283 | 3.15091 | 10 |
| -7 | -15 | -3 | 8.81753 | 2.76314 | 10 |
| -8 | -16 | 3  | 2.74299 | 2.46596 | 10 |
| -7 | 16  | 3  | 12.2818 | 0.96341 | 6  |
| -7 | 16  | 3  | 12.4265 | 2.38582 | 7  |
| -7 | 16  | 3  | 11.0639 | 0.93733 | 6  |
| -7 | 16  | 3  | 11.5176 | 1.25546 | 9  |
| -6 | 16  | 3  | 97.1340 | 6.19269 | 9  |
| 6  | 16  | -3 | 72.2842 | 9.21465 | 10 |
| -6 | 16  | 3  | 100.177 | 7.32022 | 7  |
| -6 | 16  | 3  | 98.6818 | 5.91700 | 6  |
| 5  | 16  | -3 | 215.410 | 17.5272 | 10 |
| -5 | 16  | 3  | 248.407 | 15.2711 | 9  |
| -5 | 16  | 3  | 255.214 | 14.9581 | 6  |
| -5 | 16  | 3  | 251.040 | 16.1209 | 7  |
| 4  | -16 | -3 | 21.7161 | 5.72348 | 2  |
| -4 | -16 | 3  | 26.1799 | 4.03892 | 13 |
| -4 | 16  | 3  | 19.3148 | 2.85367 | 7  |
| 4  | 16  | -3 | 27.9519 | 4.86255 | 10 |
| -4 | 16  | 3  | 19.2384 | 2.19194 | 9  |
| 3  | -16 | -3 | 201.279 | 16.0694 | 2  |
| 3  | 16  | -3 | 167.115 | 14.1538 | 10 |
| -3 | 16  | 3  | 203.247 | 12.0479 | 11 |
| 2  | -16 | -3 | 52.0061 | 7.47837 | 2  |
| 1  | -16 | -3 | 114.318 | 11.2084 | 2  |
| 1  | 16  | -3 | 124.078 | 8.36145 | 4  |
| -1 | 16  | 3  | 103.404 | 8.11431 | 4  |
| 0  | -16 | -3 | 28.9464 | 5.96541 | 2  |
| 0  | 16  | -3 | 34.4233 | 3.09815 | 4  |
| -1 | -16 | -3 | 37.3241 | 6.62518 | 2  |



|    |     |    |         |         |    |
|----|-----|----|---------|---------|----|
| -1 | 16  | -3 | 33.0689 | 2.93824 | 9  |
| -1 | 16  | -3 | 33.8341 | 3.42178 | 3  |
| -2 | -16 | -3 | 2.26890 | 3.10719 | 2  |
| -2 | 16  | -3 | 0.91336 | 0.93124 | 9  |
| 2  | 16  | 3  | 0.90215 | 2.97501 | 10 |
| -2 | 16  | -3 | 1.93539 | 0.45144 | 6  |
| -3 | -16 | -3 | 13.8610 | 4.51546 | 2  |
| -3 | 16  | -3 | 10.6379 | 0.92419 | 6  |
| -4 | -16 | -3 | 54.5042 | 8.95555 | 1  |
| -4 | 16  | -3 | 58.7378 | 3.65160 | 9  |
| -4 | 16  | -3 | 57.0904 | 3.69491 | 9  |
| 4  | 16  | 3  | 52.9209 | 7.42349 | 10 |
| -4 | 16  | -3 | 66.4989 | 6.21266 | 12 |
| -5 | -16 | -3 | 209.050 | 15.3995 | 10 |
| -5 | -16 | -3 | 209.361 | 18.7149 | 1  |
| -5 | 16  | -3 | 215.129 | 14.8418 | 12 |
| -6 | -16 | -3 | 12.8239 | 3.32180 | 10 |
| -6 | -16 | -3 | 12.3124 | 3.74731 | 10 |
| -6 | 16  | -3 | 10.3333 | 3.16447 | 12 |
| -7 | -16 | -3 | 0.39145 | 2.06275 | 10 |
| -8 | -17 | 3  | 3.24222 | 2.32910 | 10 |
| -7 | -17 | 3  | 13.5261 | 3.46793 | 10 |
| -7 | 17  | 3  | 10.6158 | 0.83719 | 6  |
| -7 | 17  | 3  | 12.0304 | 1.10880 | 9  |
| -7 | 17  | 3  | 11.6590 | 0.84594 | 6  |
| 6  | 17  | -3 | 12.0899 | 4.29169 | 10 |
| -6 | 17  | 3  | 21.3595 | 1.92154 | 9  |
| -6 | 17  | 3  | 20.6118 | 3.27275 | 7  |
| -6 | 17  | 3  | 20.1865 | 1.50443 | 6  |
| -5 | 17  | 3  | 22.6619 | 2.19098 | 9  |
| -5 | 17  | 3  | 24.7569 | 1.82778 | 6  |
| -5 | 17  | 3  | 23.0584 | 3.38386 | 7  |
| -4 | -17 | 3  | 51.3432 | 5.49619 | 13 |
| 4  | 17  | -3 | 49.6420 | 6.69449 | 10 |
| -4 | 17  | 3  | 59.1618 | 4.09417 | 9  |
| 3  | -17 | -3 | 12.3349 | 4.40273 | 2  |
| -3 | -17 | 3  | 8.90181 | 2.52299 | 13 |
| 3  | 17  | -3 | 7.91627 | 3.23595 | 10 |
| -3 | 17  | 3  | 14.6419 | 1.75260 | 11 |
| 2  | -17 | -3 | 49.0128 | 7.82258 | 2  |
| 2  | 17  | -3 | 67.3707 | 6.37007 | 10 |
| 1  | -17 | -3 | 88.5319 | 9.95648 | 2  |
| 0  | -17 | -3 | 4.52760 | 3.23719 | 2  |
| -1 | -17 | -3 | 161.095 | 14.5255 | 2  |
| 1  | 17  | 3  | 188.798 | 13.3341 | 10 |
| -1 | 17  | -3 | 160.267 | 11.1409 | 9  |
| -1 | 17  | -3 | 176.014 | 10.7356 | 11 |
| -2 | -17 | -3 | 8.59917 | 3.01408 | 13 |
| -2 | -17 | -3 | 8.81716 | 3.82523 | 2  |
| -2 | 17  | -3 | 10.7217 | 1.48144 | 9  |

|    |     |    |         |         |    |
|----|-----|----|---------|---------|----|
| 2  | 17  | 3  | 9.40992 | 3.63824 | 10 |
| -2 | 17  | -3 | 12.7826 | 1.07593 | 6  |
| -2 | 17  | -3 | 12.5462 | 3.55410 | 14 |
| -2 | 17  | -3 | 10.2524 | 3.41987 | 12 |
| -3 | -17 | -3 | 18.0653 | 3.28342 | 13 |
| -3 | 17  | -3 | 14.1544 | 1.24310 | 6  |
| -3 | 17  | -3 | 14.2416 | 1.64231 | 9  |
| -3 | 17  | -3 | 15.8885 | 3.24067 | 12 |
| -3 | 17  | -3 | 15.4053 | 1.16959 | 6  |
| 3  | 17  | 3  | 16.4536 | 4.32323 | 10 |
| -4 | -17 | -3 | 88.1799 | 10.5732 | 1  |
| -4 | 17  | -3 | 67.0108 | 4.29853 | 9  |
| -4 | 17  | -3 | 64.1620 | 4.24253 | 9  |
| 4  | 17  | 3  | 75.3667 | 8.26903 | 10 |
| -4 | 17  | -3 | 63.6586 | 6.50707 | 12 |
| -5 | -17 | -3 | 165.841 | 13.5235 | 10 |
| -5 | 17  | -3 | 201.240 | 13.2171 | 12 |
| -6 | -17 | -3 | 1.15826 | 3.10221 | 10 |
| -6 | -17 | -3 | 0.94106 | 2.61750 | 10 |
| -7 | -17 | -3 | 0.62600 | 1.94361 | 10 |
| -7 | -18 | 3  | 2.22784 | 1.94561 | 10 |
| -7 | 18  | 3  | 0.81064 | 0.40632 | 9  |
| 7  | 18  | -3 | 1.22610 | 3.50394 | 10 |
| -7 | 18  | 3  | 1.03760 | 0.37899 | 9  |
| -6 | 18  | 3  | 3.26315 | 0.84280 | 9  |
| -6 | 18  | 3  | 3.97510 | 0.55358 | 6  |
| 6  | 18  | -3 | 13.4233 | 4.43446 | 10 |
| -5 | 18  | 3  | 139.248 | 9.16752 | 6  |
| 5  | 18  | -3 | 157.257 | 12.3462 | 10 |
| -5 | 18  | 3  | 150.800 | 9.52340 | 9  |
| -4 | -18 | 3  | 62.3732 | 6.50731 | 13 |
| -4 | 18  | 3  | 63.0198 | 4.58794 | 9  |
| 4  | 18  | -3 | 62.8426 | 7.22897 | 10 |
| -3 | -18 | 3  | 21.6528 | 4.05349 | 13 |
| 3  | 18  | -3 | 19.1234 | 3.94879 | 10 |
| -3 | 18  | 3  | 16.5693 | 1.73997 | 11 |
| -3 | 18  | 3  | 16.8308 | 1.65046 | 11 |
| 2  | -18 | -3 | 201.262 | 16.9174 | 2  |
| -2 | -18 | 3  | 189.732 | 13.3797 | 13 |
| 2  | 18  | -3 | 196.383 | 14.1123 | 10 |
| -2 | 18  | 3  | 182.575 | 12.3870 | 11 |
| 1  | -18 | -3 | 2.54105 | 3.43684 | 2  |
| -1 | 18  | 3  | 2.86565 | 2.01162 | 10 |
| 0  | -18 | -3 | 0.28483 | 2.92618 | 2  |
| 0  | 18  | 3  | -1.6581 | 2.41963 | 10 |
| 0  | 18  | -3 | 3.16302 | 1.63765 | 11 |
| -1 | -18 | -3 | 17.6193 | 4.81106 | 2  |
| -1 | -18 | -3 | 20.5254 | 3.51079 | 13 |
| -1 | 18  | -3 | 19.8020 | 1.59847 | 11 |
| -1 | 18  | -3 | 17.2881 | 1.53656 | 11 |

|    |     |    |         |         |    |
|----|-----|----|---------|---------|----|
| 1  | 18  | 3  | 18.6508 | 3.84526 | 10 |
| -2 | -18 | -3 | 12.0530 | 3.21068 | 13 |
| -2 | 18  | -3 | 16.8850 | 3.34849 | 12 |
| -2 | 18  | -3 | 17.0739 | 2.09207 | 9  |
| 2  | 18  | 3  | 8.65740 | 3.80476 | 10 |
| -2 | 18  | -3 | 14.5374 | 1.26710 | 6  |
| -3 | -18 | -3 | 2.85402 | 2.75135 | 13 |
| -3 | 18  | -3 | 15.2426 | 3.23143 | 12 |
| -3 | 18  | -3 | 7.97449 | 0.81514 | 6  |
| -3 | 18  | -3 | 8.29723 | 1.17675 | 9  |
| -3 | 18  | -3 | 8.35421 | 0.81141 | 6  |
| 3  | 18  | 3  | 1.35367 | 3.42839 | 10 |
| -4 | -18 | -3 | 48.6600 | 9.02757 | 1  |
| -4 | 18  | -3 | 56.8541 | 3.43563 | 9  |
| 4  | 18  | 3  | 39.3394 | 7.12743 | 10 |
| -4 | 18  | -3 | 57.8171 | 3.48398 | 9  |
| -4 | 18  | -3 | 54.0666 | 6.01438 | 12 |
| -5 | -18 | -3 | 0.03228 | 2.86663 | 10 |
| -5 | -18 | -3 | 1.27643 | 2.29422 | 10 |
| -5 | 18  | -3 | -1.0102 | 3.07887 | 12 |
| 5  | 18  | 3  | 0.55796 | 2.60770 | 10 |
| -6 | -18 | -3 | 35.7049 | 4.36706 | 10 |
| -6 | -18 | -3 | 41.3035 | 4.39211 | 10 |
| -7 | -18 | -3 | 2.06113 | 1.95776 | 10 |
| 7  | 19  | -3 | 4.47864 | 2.47161 | 10 |
| -6 | 19  | 3  | 20.9040 | 1.45541 | 6  |
| -6 | 19  | 3  | 19.6882 | 1.44386 | 6  |
| -6 | 19  | 3  | 20.0624 | 1.74447 | 9  |
| 6  | 19  | -3 | 21.0627 | 4.24828 | 10 |
| 5  | 19  | -3 | 164.838 | 12.1123 | 10 |
| -5 | 19  | 3  | 150.109 | 9.49002 | 6  |
| -5 | 19  | 3  | 148.036 | 9.76371 | 9  |
| -4 | -19 | 3  | 54.8063 | 6.09549 | 13 |
| 4  | 19  | -3 | 53.0332 | 6.44127 | 10 |
| -4 | 19  | 3  | 35.2296 | 3.46456 | 9  |
| -3 | -19 | 3  | 24.5055 | 4.29779 | 13 |
| 3  | 19  | -3 | 22.3146 | 4.23249 | 10 |
| -2 | -19 | 3  | 26.0064 | 3.92739 | 13 |
| -2 | 19  | 3  | 26.6403 | 3.04134 | 11 |
| 2  | 19  | -3 | 25.2270 | 4.14691 | 10 |
| -1 | -19 | 3  | 0.98582 | 2.62026 | 13 |
| 1  | -19 | -3 | 2.05296 | 2.49267 | 13 |
| -1 | 19  | 3  | 0.64722 | 2.27253 | 10 |
| 1  | 19  | -3 | 4.05480 | 2.76681 | 10 |
| 0  | -19 | -3 | 7.75561 | 2.86034 | 13 |
| 0  | 19  | -3 | 5.47334 | 1.82606 | 11 |
| -1 | -19 | -3 | 71.6038 | 6.67880 | 13 |
| 1  | 19  | 3  | 84.0902 | 7.73900 | 10 |
| -2 | -19 | -3 | 121.572 | 9.60432 | 13 |
| -2 | 19  | -3 | 123.259 | 8.27813 | 9  |

|    |     |    |         |         |    |
|----|-----|----|---------|---------|----|
| -2 | 19  | -3 | 131.931 | 7.96582 | 6  |
| -2 | 19  | -3 | 141.859 | 9.81370 | 12 |
| 2  | 19  | 3  | 122.424 | 10.7619 | 10 |
| -3 | -19 | -3 | 89.2606 | 7.84026 | 13 |
| -3 | 19  | -3 | 93.8040 | 5.66805 | 6  |
| -3 | 19  | -3 | 85.5249 | 5.69330 | 6  |
| -3 | 19  | -3 | 95.2032 | 7.85027 | 12 |
| 3  | 19  | 3  | 98.8041 | 9.09484 | 10 |
| -3 | 19  | -3 | 88.4070 | 5.94200 | 9  |
| -4 | 19  | -3 | 6.19046 | 3.33430 | 12 |
| 4  | 19  | 3  | 3.83317 | 4.00757 | 10 |
| 5  | 19  | 3  | 26.7917 | 4.69254 | 10 |
| -6 | -19 | -3 | 12.4818 | 2.86298 | 10 |
| 7  | 20  | -3 | 6.09869 | 3.05326 | 10 |
| 6  | 20  | -3 | 1.45542 | 3.40821 | 10 |
| -6 | 20  | 3  | 3.41060 | 0.65325 | 9  |
| -6 | 20  | 3  | 2.51579 | 0.35361 | 6  |
| -6 | 20  | 3  | 2.08493 | 0.34776 | 6  |
| -5 | 20  | 3  | 20.4920 | 2.12425 | 9  |
| -5 | 20  | 3  | 21.3825 | 1.60853 | 6  |
| -4 | -20 | 3  | 69.0895 | 7.23070 | 13 |
| -4 | 20  | 3  | 79.8234 | 5.06886 | 9  |
| 4  | 20  | -3 | 54.9443 | 7.49942 | 10 |
| -3 | -20 | 3  | 12.8694 | 3.42358 | 13 |
| 3  | 20  | -3 | 14.1823 | 3.69258 | 10 |
| -2 | -20 | 3  | 83.0197 | 7.51252 | 13 |
| -2 | 20  | 3  | 90.9734 | 6.06318 | 11 |
| 2  | 20  | -3 | 84.8860 | 7.78890 | 10 |
| 1  | -20 | -3 | 54.8732 | 5.22704 | 13 |
| -1 | -20 | 3  | 40.0680 | 5.78583 | 13 |
| 1  | 20  | -3 | 45.6768 | 5.35726 | 10 |
| -1 | 20  | 3  | 48.2205 | 5.11916 | 10 |
| 0  | -20 | -3 | 63.7149 | 5.88776 | 13 |
| 0  | 20  | 3  | 61.1288 | 6.18490 | 10 |
| 0  | 20  | -3 | 50.8097 | 4.52347 | 11 |
| -1 | -20 | -3 | 84.1520 | 7.17293 | 13 |
| 1  | 20  | 3  | 83.6340 | 7.92531 | 10 |
| -2 | -20 | -3 | 49.2147 | 5.76555 | 13 |
| -2 | 20  | -3 | 59.9169 | 3.79045 | 6  |
| 2  | 20  | 3  | 48.7693 | 6.70262 | 10 |
| -2 | 20  | -3 | 63.4635 | 4.33889 | 9  |
| -2 | 20  | -3 | 61.4170 | 3.80083 | 6  |
| -3 | 20  | -3 | 52.5306 | 3.46150 | 6  |
| -3 | 20  | -3 | 49.0156 | 3.39054 | 6  |
| -3 | 20  | -3 | 59.6916 | 3.82349 | 9  |
| 4  | 20  | 3  | 3.10491 | 2.70335 | 10 |
| 5  | 20  | 3  | 36.2935 | 6.00408 | 10 |
| -6 | -20 | -3 | 0.40214 | 1.94898 | 10 |
| 6  | 21  | -3 | 0.07684 | 2.23417 | 10 |
| -6 | 21  | 3  | 0.16787 | 0.43173 | 9  |

|    |     |    |         |         |    |
|----|-----|----|---------|---------|----|
| -6 | 21  | 3  | 0.70151 | 0.37871 | 9  |
| -5 | 21  | 3  | 8.04037 | 1.19000 | 9  |
| -5 | 21  | 3  | 7.10960 | 0.75328 | 6  |
| -4 | -21 | 3  | 0.28491 | 2.55098 | 13 |
| -4 | 21  | 3  | -0.8051 | 1.12682 | 9  |
| 4  | 21  | -3 | 2.63621 | 3.39206 | 10 |
| -3 | -21 | 3  | 14.6554 | 3.23724 | 13 |
| -2 | -21 | 3  | 0.10382 | 2.27241 | 13 |
| 2  | 21  | -3 | 0.58520 | 2.47981 | 10 |
| -2 | 21  | 3  | 4.36630 | 1.19457 | 11 |
| -2 | 21  | 3  | 4.40440 | 1.18777 | 11 |
| 1  | -21 | -3 | 4.74977 | 2.65526 | 13 |
| -1 | -21 | 3  | 5.86573 | 2.45565 | 13 |
| -1 | 21  | 3  | 3.72223 | 1.65226 | 11 |
| 1  | 21  | -3 | 4.70496 | 2.43755 | 11 |
| 0  | -21 | -3 | 151.144 | 11.4547 | 13 |
| 0  | 21  | 3  | 158.310 | 11.9289 | 10 |
| 0  | 21  | -3 | 160.446 | 10.3137 | 11 |
| 0  | 21  | -3 | 169.751 | 10.2854 | 11 |
| -1 | -21 | -3 | 246.266 | 16.5544 | 13 |
| 1  | 21  | 3  | 233.477 | 16.8983 | 10 |
| -2 | -21 | -3 | 7.17722 | 2.92279 | 13 |
| -2 | 21  | -3 | 5.72816 | 0.80568 | 6  |
| -2 | 21  | -3 | 7.39247 | 1.52577 | 9  |
| 2  | 21  | 3  | 10.4019 | 3.72799 | 10 |
| -3 | -21 | -3 | 1.24314 | 2.97655 | 13 |
| -3 | 21  | -3 | 1.19495 | 0.41470 | 6  |
| 3  | 21  | 3  | 0.10277 | 3.31001 | 10 |
| -3 | 21  | -3 | 0.93964 | 0.44713 | 6  |
| -3 | 21  | -3 | 1.03973 | 0.80745 | 9  |
| 4  | 21  | 3  | 11.7667 | 4.21042 | 10 |
| 5  | 21  | 3  | 20.1205 | 4.05028 | 10 |
| 6  | 22  | -3 | 10.2513 | 2.53890 | 10 |
| 5  | 22  | -3 | 17.4383 | 3.29462 | 10 |
| -5 | 22  | 3  | 14.7055 | 1.21351 | 6  |
| -5 | 22  | 3  | 18.1947 | 1.65420 | 9  |
| -4 | -22 | 3  | 22.6900 | 3.46404 | 13 |
| -4 | 22  | 3  | 14.6801 | 1.39897 | 6  |
| 4  | 22  | -3 | 20.2434 | 3.94190 | 10 |
| -4 | 22  | 3  | 19.8550 | 2.21881 | 9  |
| -3 | -22 | 3  | 3.68021 | 2.45620 | 13 |
| 3  | 22  | -3 | 2.76098 | 2.84004 | 10 |
| -2 | -22 | 3  | -1.5702 | 2.35299 | 13 |
| 2  | 22  | -3 | 1.29935 | 2.20391 | 10 |
| -2 | 22  | 3  | -0.1734 | 0.66235 | 11 |
| -2 | 22  | 3  | 0.34643 | 0.79411 | 11 |
| 1  | -22 | -3 | 3.95281 | 2.47624 | 13 |
| -1 | -22 | 3  | 5.19665 | 2.46601 | 13 |
| -1 | 22  | 3  | 3.95730 | 1.89244 | 11 |
| 0  | -22 | -3 | 31.6172 | 4.68851 | 13 |

|    |     |    |         |         |    |
|----|-----|----|---------|---------|----|
| 0  | 22  | -3 | 25.9630 | 2.24733 | 11 |
| 0  | 22  | -3 | 21.2411 | 2.11201 | 11 |
| -1 | -22 | -3 | 8.17550 | 2.79308 | 13 |
| 1  | 22  | 3  | 6.41644 | 2.96721 | 10 |
| -2 | -22 | -3 | 9.94554 | 2.84071 | 13 |
| -2 | 22  | -3 | 4.64573 | 1.21737 | 9  |
| -2 | 22  | -3 | 5.36200 | 0.76798 | 6  |
| 2  | 22  | 3  | 11.1340 | 2.90507 | 10 |
| -3 | -22 | -3 | 3.38420 | 2.42623 | 13 |
| 3  | 22  | 3  | 4.80956 | 3.31182 | 10 |
| -3 | 22  | -3 | 5.63237 | 0.96931 | 9  |
| -3 | 22  | -3 | 6.34683 | 0.59972 | 6  |
| -3 | 22  | -3 | 5.70721 | 0.63116 | 6  |
| 4  | 22  | 3  | -2.3587 | 2.26182 | 10 |
| 5  | 22  | 3  | 3.92204 | 2.95271 | 10 |
| 6  | 23  | -3 | 0.10693 | 2.44141 | 10 |
| 5  | 23  | -3 | 2.27581 | 2.68821 | 10 |
| -4 | -23 | 3  | 20.4537 | 3.84989 | 13 |
| -4 | 23  | 3  | 16.4440 | 1.40837 | 6  |
| -4 | 23  | 3  | 15.6847 | 1.87142 | 9  |
| 4  | 23  | -3 | 15.7882 | 2.95247 | 10 |
| -3 | -23 | 3  | 46.6847 | 5.34210 | 13 |
| 3  | 23  | -3 | 44.4695 | 5.20971 | 10 |
| 2  | -23 | -3 | 5.37572 | 2.52168 | 13 |
| 1  | -23 | -3 | 6.90504 | 2.43683 | 13 |
| -1 | 23  | 3  | 6.55164 | 1.50513 | 11 |
| 1  | 23  | -3 | 3.82302 | 1.56452 | 11 |
| 0  | -23 | -3 | 19.5604 | 3.36152 | 13 |
| 0  | 23  | 3  | 21.8183 | 3.29676 | 10 |
| -1 | -23 | -3 | 21.2105 | 3.54346 | 13 |
| -2 | -23 | -3 | 20.1772 | 3.28337 | 13 |
| 2  | 23  | 3  | 12.8286 | 3.42072 | 10 |
| -2 | 23  | -3 | 14.5368 | 1.98156 | 9  |
| -2 | 23  | -3 | 15.0673 | 1.31873 | 6  |
| -3 | -23 | -3 | 15.9382 | 2.97581 | 13 |
| -3 | 23  | -3 | 7.13677 | 1.05647 | 9  |
| -3 | 23  | -3 | 9.51078 | 0.79724 | 6  |
| -3 | 23  | -3 | 10.8913 | 0.81351 | 6  |
| 3  | 23  | 3  | 13.9950 | 3.60283 | 10 |
| 4  | 23  | 3  | 23.6193 | 4.60862 | 10 |
| 5  | 23  | 3  | 1.81770 | 2.64334 | 10 |
| 5  | 24  | -3 | 11.6122 | 2.55653 | 10 |
| -4 | -24 | 3  | 4.50669 | 2.02999 | 13 |
| -4 | 24  | 3  | 5.95202 | 1.12734 | 9  |
| 4  | 24  | -3 | 6.26208 | 2.37865 | 10 |
| -3 | -24 | 3  | 7.36358 | 2.51749 | 13 |
| 3  | 24  | -3 | 6.38108 | 2.57148 | 10 |
| 1  | -24 | -3 | 16.2070 | 3.37368 | 13 |
| -1 | -24 | 3  | 18.9058 | 3.01513 | 13 |
| 1  | 24  | -3 | 20.0907 | 2.21029 | 11 |

|    |     |    |         |         |    |
|----|-----|----|---------|---------|----|
| -1 | 24  | 3  | 15.8990 | 1.88897 | 11 |
| -1 | 24  | 3  | 14.2021 | 2.03715 | 11 |
| 1  | 24  | -3 | 22.2652 | 2.21449 | 11 |
| 0  | -24 | -3 | 1.75693 | 2.42315 | 13 |
| 0  | -24 | 3  | 0.38436 | 2.34900 | 13 |
| 0  | 24  | 3  | 1.52642 | 1.59251 | 11 |
| -1 | -24 | -3 | 4.29379 | 2.57957 | 13 |
| 1  | 24  | 3  | 0.98763 | 2.05193 | 10 |
| -2 | -24 | -3 | 13.0868 | 2.78584 | 13 |
| 2  | 24  | 3  | 12.6052 | 3.12233 | 10 |
| -2 | 24  | -3 | 16.3014 | 1.82358 | 9  |
| -2 | 24  | -3 | 15.1050 | 1.25063 | 6  |
| -3 | -24 | -3 | 23.6979 | 3.78318 | 13 |
| -3 | 24  | -3 | 27.7789 | 1.90994 | 9  |
| 3  | 24  | 3  | 25.2579 | 4.38682 | 10 |
| -3 | 24  | -3 | 28.5902 | 1.98418 | 9  |
| 4  | 24  | 3  | 3.41415 | 2.48535 | 10 |
| -4 | -25 | 3  | 16.6823 | 2.72507 | 13 |
| 4  | 25  | -3 | 14.4450 | 2.55029 | 10 |
| -3 | -25 | 3  | 3.36850 | 2.03363 | 13 |
| 3  | 25  | -3 | 2.27683 | 1.45842 | 11 |
| 2  | -25 | -3 | 32.9577 | 4.16022 | 13 |
| -2 | -25 | 3  | 21.5310 | 4.09791 | 13 |
| 2  | 25  | -3 | 23.0666 | 2.69184 | 11 |
| 1  | -25 | -3 | 1.27821 | 1.97651 | 13 |
| -1 | -25 | 3  | 2.17722 | 2.09574 | 13 |
| 0  | -25 | -3 | -2.0380 | 2.49171 | 13 |
| 0  | -25 | 3  | 0.61036 | 1.81053 | 13 |
| 0  | 25  | 3  | -0.8351 | 1.23288 | 11 |
| -1 | -25 | -3 | 0.13556 | 2.06668 | 13 |
| 1  | 25  | 3  | 0.70028 | 1.54253 | 10 |
| 1  | 25  | 3  | 1.06644 | 1.23328 | 11 |
| -2 | -25 | -3 | 22.4528 | 3.14204 | 13 |
| -2 | 25  | -3 | 18.5219 | 1.39571 | 6  |
| 2  | 25  | 3  | 20.7779 | 3.35848 | 10 |
| -2 | 25  | -3 | 16.7065 | 1.88782 | 9  |
| 3  | 25  | 3  | 6.82358 | 2.37114 | 10 |
| -3 | -26 | 3  | 7.86247 | 1.89445 | 13 |
| 3  | 26  | -3 | 6.10347 | 1.27888 | 11 |
| 2  | -26 | -3 | 24.2227 | 3.13169 | 13 |
| -2 | -26 | 3  | 30.5390 | 3.76666 | 13 |
| -1 | -26 | 3  | 3.45985 | 1.97512 | 13 |
| 1  | -26 | -3 | 7.05627 | 1.98960 | 13 |
| 0  | -26 | 3  | 7.18856 | 2.35446 | 13 |
| 0  | -26 | -3 | 7.53675 | 2.12582 | 13 |
| 0  | 26  | 3  | 7.62476 | 1.13460 | 11 |
| 0  | 26  | 3  | 7.86633 | 1.15729 | 11 |
| -1 | -26 | -3 | 0.47591 | 1.77263 | 13 |
| 1  | 26  | 3  | 0.28956 | 1.08994 | 11 |
| -1 | 26  | -3 | -0.0114 | 1.31775 | 9  |

|     |     |    |         |         |    |
|-----|-----|----|---------|---------|----|
| -2  | -26 | -3 | 0.68770 | 1.48015 | 13 |
| 2   | 26  | 3  | -0.1272 | 1.58519 | 10 |
| 2   | -27 | -3 | 2.62566 | 1.35961 | 13 |
| -2  | -27 | 3  | 0.98426 | 1.52054 | 13 |
| -1  | -27 | 3  | 6.57850 | 1.84288 | 13 |
| 1   | -27 | -3 | 9.97193 | 1.83743 | 13 |
| 0   | -27 | -3 | 0.97731 | 1.51478 | 13 |
| 0   | -27 | 3  | 1.76360 | 1.75257 | 13 |
| -1  | -27 | -3 | 5.44171 | 1.69207 | 13 |
| 1   | 27  | 3  | 5.54516 | 0.76242 | 11 |
| 1   | 27  | 3  | 7.10468 | 1.00372 | 11 |
| 10  | 0   | -4 | 4.61674 | 2.87899 | 13 |
| -10 | 0   | 4  | 1.26376 | 1.26544 | 8  |
| 9   | 0   | -4 | 4.01960 | 3.17254 | 13 |
| -9  | 0   | 4  | 0.00126 | 1.52482 | 7  |
| -8  | 0   | 4  | 14.7769 | 2.67125 | 10 |
| 8   | 0   | -4 | 15.6751 | 4.38889 | 13 |
| -7  | 0   | 4  | 35.7627 | 4.15553 | 10 |
| -6  | 0   | 4  | 7.00196 | 2.90754 | 1  |
| -5  | 0   | 4  | 22.1333 | 4.16942 | 1  |
| -4  | 0   | 4  | 281.003 | 19.4268 | 1  |
| -4  | 0   | 4  | 288.227 | 19.1473 | 5  |
| -3  | 0   | 4  | 78.6002 | 6.12603 | 4  |
| -3  | 0   | 4  | 85.4945 | 7.81917 | 5  |
| -2  | 0   | 4  | 8172.91 | 492.424 | 5  |
| -2  | 0   | 4  | 7930.68 | 488.461 | 4  |
| 1   | 0   | -4 | 1256.64 | 77.8074 | 4  |
| -1  | 0   | 4  | 1294.06 | 79.0615 | 5  |
| 0   | 0   | -4 | 3402.40 | 199.942 | 5  |
| 0   | 0   | -4 | 3219.51 | 197.837 | 4  |
| 0   | 0   | 4  | 3246.70 | 199.160 | 5  |
| 0   | 0   | -4 | 3316.19 | 197.986 | 4  |
| 0   | 0   | -4 | 3047.63 | 198.689 | 5  |
| 0   | 0   | -4 | 3362.47 | 197.927 | 3  |
| -1  | 0   | -4 | 7.97961 | 1.74166 | 2  |
| -1  | 0   | -4 | 7.19968 | 1.77964 | 5  |
| -1  | 0   | -4 | 8.25483 | 1.43517 | 3  |
| -1  | 0   | -4 | 7.48778 | 1.56328 | 4  |
| -1  | 0   | -4 | 5.92450 | 1.20008 | 4  |
| -1  | 0   | -4 | 6.45487 | 1.40198 | 5  |
| -2  | 0   | -4 | 1774.85 | 110.338 | 4  |
| -2  | 0   | -4 | 1719.89 | 110.474 | 4  |
| -2  | 0   | -4 | 1847.75 | 111.165 | 2  |
| -2  | 0   | -4 | 1920.80 | 110.512 | 3  |
| -3  | 0   | -4 | 0.73902 | 0.98222 | 3  |
| -3  | 0   | -4 | 1.13633 | 1.63180 | 2  |
| -3  | 0   | -4 | 1.38353 | 1.25825 | 4  |
| -3  | 0   | -4 | 0.91649 | 1.38450 | 1  |
| -4  | 0   | -4 | 357.715 | 23.0769 | 3  |
| -4  | 0   | -4 | 364.197 | 22.9710 | 4  |



|     |    |    |         |         |    |
|-----|----|----|---------|---------|----|
| -4  | 0  | -4 | 365.149 | 24.6449 | 2  |
| -5  | 0  | -4 | 4.17326 | 1.44168 | 8  |
| -6  | 0  | -4 | 116.178 | 7.89530 | 8  |
| -7  | 0  | -4 | 3.60099 | 1.51110 | 8  |
| -8  | 0  | -4 | 59.7513 | 4.26807 | 8  |
| 9   | 0  | 4  | 4.05456 | 2.59297 | 13 |
| 10  | -1 | -4 | 11.8685 | 3.05510 | 13 |
| -10 | -1 | 4  | 9.18482 | 1.56927 | 8  |
| 10  | 1  | -4 | 11.2049 | 3.14978 | 13 |
| 9   | -1 | -4 | 4.70874 | 3.11705 | 13 |
| 9   | -1 | -4 | 4.23949 | 3.20413 | 13 |
| -9  | 1  | 4  | 6.65435 | 1.57787 | 7  |
| 9   | 1  | -4 | 9.50906 | 3.55077 | 13 |
| 8   | -1 | -4 | 7.89782 | 3.33797 | 13 |
| -8  | 1  | 4  | 10.6746 | 1.72243 | 11 |
| -7  | -1 | 4  | 33.6103 | 4.41453 | 10 |
| -7  | 1  | 4  | 26.0318 | 3.61035 | 10 |
| -6  | -1 | 4  | 26.4760 | 4.51490 | 1  |
| -6  | 1  | 4  | 20.6635 | 3.71628 | 1  |
| -6  | 1  | 4  | 22.5767 | 3.85144 | 4  |
| -5  | -1 | 4  | 8.83799 | 2.20028 | 5  |
| -5  | -1 | 4  | 9.52839 | 3.26670 | 1  |
| -5  | 1  | 4  | 12.4160 | 2.22769 | 4  |
| -5  | 1  | 4  | 13.4441 | 2.99548 | 1  |
| -4  | -1 | 4  | 366.792 | 25.3136 | 1  |
| -4  | -1 | 4  | 374.591 | 25.1986 | 5  |
| -4  | 1  | 4  | 390.261 | 24.1930 | 5  |
| -4  | 1  | 4  | 372.815 | 24.8354 | 1  |
| -4  | 1  | 4  | 381.953 | 23.8003 | 4  |
| -3  | -1 | 4  | 994.395 | 63.2802 | 5  |
| -3  | 1  | 4  | 1028.26 | 61.6925 | 4  |
| -3  | 1  | 4  | 1000.39 | 62.7501 | 5  |
| -2  | -1 | 4  | 1397.88 | 83.5844 | 5  |
| -2  | 1  | 4  | 1332.71 | 81.9397 | 4  |
| -2  | 1  | 4  | 1242.95 | 82.0803 | 3  |
| -2  | 1  | 4  | 1407.68 | 83.2914 | 5  |
| 1   | -1 | -4 | 9462.66 | 564.000 | 2  |
| -1  | -1 | 4  | 8485.76 | 565.236 | 5  |
| -1  | 1  | 4  | 9999.99 | 568.688 | 5  |
| 1   | 1  | -4 | 9115.10 | 560.345 | 4  |
| 0   | -1 | -4 | 3027.43 | 192.205 | 4  |
| 0   | -1 | -4 | 2899.56 | 192.110 | 3  |
| 0   | -1 | -4 | 3061.87 | 192.686 | 5  |
| 0   | -1 | -4 | 2957.68 | 192.321 | 2  |
| 0   | 1  | -4 | 3414.27 | 192.141 | 3  |
| 0   | 1  | -4 | 3401.86 | 194.485 | 5  |
| 0   | 1  | -4 | 3410.67 | 192.196 | 4  |
| 0   | 1  | 4  | 2899.84 | 193.294 | 5  |
| 0   | 1  | -4 | 3302.01 | 192.902 | 5  |
| 0   | 1  | -4 | 3319.92 | 192.074 | 4  |

|     |    |    |         |         |    |
|-----|----|----|---------|---------|----|
| -1  | -1 | -4 | 211.874 | 12.7612 | 5  |
| -1  | -1 | -4 | 207.265 | 13.1467 | 5  |
| -1  | -1 | -4 | 217.271 | 12.4271 | 3  |
| -1  | -1 | -4 | 203.249 | 12.7548 | 2  |
| -1  | -1 | -4 | 210.610 | 12.5158 | 4  |
| -1  | 1  | -4 | 168.902 | 12.2062 | 4  |
| -1  | 1  | -4 | 185.081 | 11.9558 | 5  |
| -1  | 1  | -4 | 180.039 | 12.1866 | 3  |
| -1  | 1  | -4 | 172.234 | 12.0936 | 4  |
| -1  | 1  | -4 | 179.840 | 11.8879 | 5  |
| -1  | 1  | -4 | 170.711 | 12.0402 | 3  |
| -2  | -1 | -4 | 243.389 | 15.7597 | 3  |
| -2  | -1 | -4 | 248.918 | 16.5178 | 2  |
| -2  | -1 | -4 | 254.715 | 15.4879 | 5  |
| -2  | -1 | -4 | 268.551 | 15.6213 | 5  |
| -2  | -1 | -4 | 260.715 | 15.8922 | 4  |
| -2  | 1  | -4 | 238.966 | 15.5979 | 3  |
| -2  | 1  | -4 | 240.713 | 15.6088 | 4  |
| -2  | 1  | -4 | 240.952 | 16.2379 | 2  |
| -2  | 1  | -4 | 217.706 | 15.4308 | 4  |
| -3  | -1 | -4 | 531.452 | 33.0946 | 2  |
| -3  | -1 | -4 | 493.599 | 32.3778 | 1  |
| -3  | -1 | -4 | 510.993 | 31.8683 | 3  |
| -3  | -1 | -4 | 532.821 | 31.9898 | 4  |
| -3  | 1  | -4 | 531.190 | 31.6714 | 4  |
| -3  | 1  | -4 | 508.846 | 32.7615 | 2  |
| -3  | 1  | -4 | 474.884 | 31.4133 | 4  |
| -3  | 1  | -4 | 500.800 | 31.6781 | 3  |
| -4  | -1 | -4 | 505.743 | 32.2120 | 2  |
| -4  | -1 | -4 | 508.491 | 30.6316 | 4  |
| -4  | 1  | -4 | 480.781 | 30.0150 | 4  |
| -4  | 1  | -4 | 469.529 | 30.1356 | 4  |
| -4  | 1  | -4 | 464.553 | 30.3821 | 3  |
| -5  | -1 | -4 | 13.4983 | 1.98223 | 8  |
| -5  | -1 | -4 | 11.0515 | 2.11747 | 4  |
| -5  | 1  | -4 | 12.5540 | 1.51402 | 4  |
| -5  | 1  | -4 | 12.3364 | 1.80191 | 8  |
| -6  | -1 | -4 | 93.3134 | 6.84338 | 8  |
| -6  | 1  | -4 | 97.5692 | 6.67022 | 8  |
| -7  | -1 | -4 | 9.34612 | 1.86488 | 8  |
| -7  | 1  | -4 | 4.39938 | 1.40075 | 8  |
| -8  | -1 | -4 | 5.00720 | 1.36099 | 8  |
| 8   | 1  | 4  | 4.90678 | 3.05469 | 13 |
| 9   | 1  | 4  | 7.80879 | 2.82216 | 13 |
| 10  | -2 | -4 | 14.2655 | 3.09988 | 13 |
| -10 | -2 | 4  | 12.3211 | 1.87115 | 8  |
| 10  | 2  | -4 | 11.3120 | 3.27398 | 13 |
| 9   | -2 | -4 | 3.68937 | 2.95648 | 13 |
| 9   | -2 | -4 | 1.35800 | 2.93609 | 13 |
| 9   | 2  | -4 | -0.9183 | 3.15570 | 13 |

|    |    |    |         |         |    |
|----|----|----|---------|---------|----|
| -9 | 2  | 4  | 0.33885 | 1.10755 | 7  |
| -8 | -2 | 4  | 92.5276 | 7.41942 | 10 |
| 8  | -2 | -4 | 90.2148 | 8.80757 | 13 |
| -8 | 2  | 4  | 85.4512 | 6.02982 | 11 |
| 8  | 2  | -4 | 90.5581 | 9.02860 | 13 |
| 8  | 2  | -4 | 86.3897 | 9.37489 | 13 |
| -7 | -2 | 4  | 37.0508 | 4.44819 | 10 |
| -7 | -2 | 4  | 36.5830 | 5.36834 | 1  |
| -7 | 2  | 4  | 37.5400 | 4.14612 | 10 |
| 7  | 2  | -4 | 31.2107 | 5.88700 | 13 |
| -6 | -2 | 4  | 314.937 | 21.7904 | 1  |
| -6 | 2  | 4  | 302.657 | 19.9539 | 4  |
| -5 | -2 | 4  | 166.284 | 11.9997 | 5  |
| -5 | -2 | 4  | 170.370 | 12.9336 | 1  |
| -5 | 2  | 4  | 152.515 | 11.7882 | 1  |
| -5 | 2  | 4  | 165.706 | 11.0876 | 4  |
| -4 | -2 | 4  | 401.314 | 24.7575 | 1  |
| -4 | -2 | 4  | 423.329 | 25.1605 | 5  |
| -4 | 2  | 4  | 323.720 | 22.8035 | 4  |
| -4 | 2  | 4  | 311.456 | 23.6640 | 1  |
| -3 | -2 | 4  | 375.074 | 25.9868 | 5  |
| -3 | 2  | 4  | 395.659 | 25.0748 | 5  |
| -3 | 2  | 4  | 393.231 | 24.2177 | 4  |
| -3 | 2  | 4  | 387.139 | 24.1723 | 3  |
| -2 | -2 | 4  | 141.688 | 10.0109 | 5  |
| -2 | 2  | 4  | 112.405 | 9.13491 | 5  |
| -2 | 2  | 4  | 115.363 | 7.93074 | 3  |
| -2 | 2  | 4  | 116.968 | 8.09280 | 4  |
| 1  | -2 | -4 | 182.639 | 12.4826 | 2  |
| -1 | 2  | 4  | 194.747 | 12.1052 | 4  |
| -1 | 2  | 4  | 189.015 | 13.3986 | 5  |
| 0  | -2 | -4 | 846.623 | 50.6430 | 5  |
| 0  | -2 | -4 | 881.100 | 50.0352 | 4  |
| 0  | -2 | -4 | 884.944 | 50.2887 | 2  |
| 0  | 2  | -4 | 795.637 | 49.9860 | 5  |
| 0  | 2  | -4 | 739.352 | 49.6542 | 4  |
| 0  | 2  | -4 | 806.672 | 49.7474 | 3  |
| 0  | 2  | -4 | 747.453 | 49.6216 | 3  |
| 0  | 2  | 4  | 873.649 | 51.2872 | 5  |
| 0  | 2  | -4 | 776.882 | 50.1857 | 5  |
| 0  | 2  | -4 | 789.467 | 49.8082 | 4  |
| -1 | -2 | -4 | 636.746 | 42.3693 | 2  |
| -1 | -2 | -4 | 642.620 | 41.9287 | 3  |
| -1 | -2 | -4 | 666.132 | 42.4672 | 5  |
| -1 | -2 | -4 | 611.618 | 42.0158 | 4  |
| -1 | 2  | -4 | 713.857 | 41.7194 | 4  |
| -1 | 2  | -4 | 735.778 | 41.8282 | 4  |
| -1 | 2  | -4 | 721.070 | 41.8030 | 3  |
| -1 | 2  | -4 | 723.294 | 41.7151 | 3  |
| -2 | -2 | -4 | 45.1691 | 4.43104 | 5  |

|     |    |    |         |         |    |
|-----|----|----|---------|---------|----|
| -2  | -2 | -4 | 39.1989 | 4.62291 | 1  |
| -2  | -2 | -4 | 43.9356 | 4.31108 | 4  |
| -2  | -2 | -4 | 42.6726 | 3.89060 | 3  |
| -2  | -2 | -4 | 45.3138 | 4.69569 | 2  |
| -2  | -2 | -4 | 48.2037 | 4.28251 | 5  |
| -2  | 2  | -4 | 60.2839 | 3.84859 | 4  |
| -2  | 2  | -4 | 61.5662 | 3.80869 | 3  |
| -3  | -2 | -4 | 374.485 | 24.9887 | 2  |
| -3  | -2 | -4 | 350.964 | 24.5590 | 1  |
| -3  | -2 | -4 | 363.628 | 23.9500 | 4  |
| -3  | 2  | -4 | 401.482 | 23.6252 | 3  |
| -3  | 2  | -4 | 379.974 | 23.2926 | 4  |
| -3  | 2  | -4 | 387.885 | 23.4449 | 4  |
| -4  | -2 | -4 | 89.0382 | 7.56010 | 4  |
| -4  | -2 | -4 | 89.4587 | 7.82421 | 1  |
| -4  | -2 | -4 | 91.1167 | 8.75075 | 2  |
| -4  | 2  | -4 | 120.929 | 7.37983 | 3  |
| -4  | 2  | -4 | 101.683 | 6.65375 | 4  |
| -4  | 2  | -4 | 112.539 | 6.86123 | 4  |
| -5  | -2 | -4 | 7.26703 | 1.48255 | 8  |
| -5  | -2 | -4 | 9.66800 | 3.60080 | 2  |
| -5  | -2 | -4 | 5.08651 | 1.85053 | 4  |
| -5  | 2  | -4 | 3.16034 | 1.22204 | 8  |
| -5  | 2  | -4 | 2.74299 | 1.25837 | 3  |
| -6  | -2 | -4 | 2.72233 | 1.37751 | 8  |
| -6  | 2  | -4 | 1.14797 | 1.12785 | 8  |
| -7  | -2 | -4 | 177.309 | 11.1335 | 8  |
| -7  | 2  | -4 | 159.236 | 10.7477 | 8  |
| 7   | 2  | 4  | 167.110 | 13.2332 | 13 |
| -8  | -2 | -4 | 20.2256 | 2.52087 | 8  |
| 8   | 2  | 4  | 19.5763 | 4.47364 | 13 |
| 9   | 2  | 4  | -0.1148 | 2.14872 | 13 |
| 10  | -3 | -4 | -0.8379 | 2.31565 | 13 |
| -10 | -3 | 4  | 1.51374 | 1.42931 | 8  |
| 10  | 3  | -4 | 0.73745 | 2.86608 | 13 |
| 9   | -3 | -4 | 9.96783 | 3.83391 | 13 |
| -9  | -3 | 4  | 7.87258 | 1.97902 | 10 |
| 9   | -3 | -4 | 13.0014 | 3.29577 | 13 |
| -9  | 3  | 4  | 13.5436 | 2.00052 | 7  |
| 9   | 3  | -4 | 9.40365 | 3.71467 | 13 |
| -8  | -3 | 4  | 87.6502 | 7.39319 | 10 |
| 8   | 3  | -4 | 84.2642 | 9.00665 | 13 |
| 8   | 3  | -4 | 82.7167 | 9.42930 | 13 |
| -8  | 3  | 4  | 87.0127 | 5.80648 | 11 |
| -7  | -3 | 4  | 16.3489 | 3.91487 | 1  |
| -7  | -3 | 4  | 19.1190 | 3.32715 | 10 |
| 7   | 3  | -4 | 26.6266 | 4.89926 | 13 |
| -7  | 3  | 4  | 18.8689 | 2.35316 | 11 |
| -6  | -3 | 4  | 367.398 | 24.3240 | 1  |
| -6  | 3  | 4  | 317.771 | 21.7466 | 4  |

|    |    |    |         |         |   |
|----|----|----|---------|---------|---|
| -5 | -3 | 4  | 8.48745 | 2.85610 | 5 |
| -5 | -3 | 4  | 10.9670 | 3.63968 | 1 |
| -4 | -3 | 4  | 226.020 | 15.4497 | 1 |
| -4 | -3 | 4  | 241.401 | 16.0605 | 5 |
| -4 | 3  | 4  | 178.092 | 14.0731 | 1 |
| -4 | 3  | 4  | 186.415 | 13.3526 | 4 |
| -3 | -3 | 4  | 74.1244 | 7.69394 | 5 |
| -3 | 3  | 4  | 89.4007 | 7.56450 | 1 |
| -3 | 3  | 4  | 84.4592 | 5.77768 | 3 |
| -3 | 3  | 4  | 81.4593 | 6.25527 | 5 |
| -3 | 3  | 4  | 75.2009 | 5.69951 | 4 |
| 2  | -3 | -4 | 138.155 | 9.93863 | 2 |
| -2 | -3 | 4  | 140.802 | 10.9772 | 5 |
| -2 | 3  | 4  | 138.396 | 9.09755 | 3 |
| -2 | 3  | 4  | 137.729 | 9.15106 | 4 |
| -2 | 3  | 4  | 141.316 | 10.2776 | 5 |
| 1  | -3 | -4 | 5267.21 | 323.859 | 2 |
| 1  | 3  | -4 | 5542.86 | 322.542 | 4 |
| -1 | 3  | 4  | 5209.68 | 322.454 | 4 |
| -1 | 3  | 4  | 5287.63 | 323.573 | 5 |
| 0  | -3 | -4 | 2355.16 | 147.538 | 4 |
| 0  | -3 | -4 | 2669.45 | 148.062 | 5 |
| 0  | -3 | -4 | 2585.22 | 147.650 | 2 |
| 0  | 3  | -4 | 2317.16 | 147.083 | 5 |
| 0  | 3  | -4 | 2400.48 | 146.885 | 4 |
| 0  | 3  | -4 | 2279.98 | 146.940 | 4 |
| 0  | 3  | -4 | 2299.41 | 146.829 | 3 |
| 0  | 3  | -4 | 2311.83 | 146.930 | 3 |
| 0  | 3  | -4 | 2477.90 | 147.975 | 5 |
| 0  | 3  | 4  | 2534.13 | 148.397 | 5 |
| -1 | -3 | -4 | 1972.83 | 118.644 | 5 |
| -1 | -3 | -4 | 1833.46 | 118.035 | 4 |
| -1 | -3 | -4 | 1815.40 | 118.425 | 2 |
| -1 | 3  | -4 | 1995.59 | 117.666 | 4 |
| -1 | 3  | -4 | 1936.74 | 117.577 | 4 |
| -1 | 3  | -4 | 2039.67 | 117.678 | 3 |
| -1 | 3  | -4 | 1972.33 | 117.573 | 3 |
| -2 | -3 | -4 | 64.5322 | 5.89565 | 5 |
| -2 | -3 | -4 | 70.0944 | 6.24706 | 2 |
| -2 | -3 | -4 | 65.8167 | 5.44510 | 4 |
| -2 | -3 | -4 | 64.4240 | 6.30368 | 1 |
| -2 | 3  | -4 | 73.0279 | 4.73627 | 4 |
| -2 | 3  | -4 | 65.8268 | 4.77905 | 3 |
| -2 | 3  | -4 | 73.7658 | 4.66405 | 4 |
| -2 | 3  | -4 | 63.6485 | 4.66632 | 3 |
| -3 | -3 | -4 | 19.8632 | 3.72495 | 1 |
| -3 | -3 | -4 | 20.5993 | 2.31698 | 5 |
| -3 | -3 | -4 | 18.8785 | 2.83960 | 4 |
| -3 | -3 | -4 | 19.2195 | 2.41157 | 5 |
| -3 | -3 | -4 | 21.3908 | 3.66983 | 2 |

|    |    |    |         |         |    |
|----|----|----|---------|---------|----|
| -3 | 3  | -4 | 27.4284 | 2.34231 | 3  |
| -4 | -3 | -4 | 8.52919 | 3.27435 | 2  |
| -4 | -3 | -4 | 6.76088 | 2.60473 | 1  |
| -4 | 3  | -4 | 6.19934 | 1.40043 | 3  |
| -5 | -3 | -4 | 4.44469 | 3.38436 | 2  |
| -5 | -3 | -4 | 4.04305 | 2.24521 | 4  |
| -5 | -3 | -4 | 5.77406 | 1.73618 | 8  |
| -5 | 3  | -4 | 7.18351 | 1.56479 | 3  |
| -5 | 3  | -4 | 9.48129 | 1.16509 | 9  |
| -5 | 3  | -4 | 7.39586 | 1.39179 | 8  |
| -6 | -3 | -4 | 103.009 | 7.41605 | 10 |
| -6 | -3 | -4 | 101.056 | 7.22421 | 8  |
| -6 | 3  | -4 | 97.4358 | 6.49423 | 9  |
| -6 | 3  | -4 | 96.6328 | 6.67894 | 8  |
| -6 | 3  | -4 | 91.8282 | 6.45831 | 9  |
| 6  | 3  | 4  | 104.891 | 9.00702 | 13 |
| -7 | -3 | -4 | 103.197 | 6.99184 | 8  |
| 7  | 3  | 4  | 100.410 | 9.68126 | 13 |
| -7 | 3  | -4 | 86.7644 | 6.53852 | 9  |
| -8 | -3 | -4 | 16.6722 | 2.61491 | 8  |
| 8  | 3  | 4  | 18.8777 | 4.54579 | 13 |
| 9  | 3  | 4  | 3.27848 | 2.72350 | 13 |
| 10 | -4 | -4 | 17.0819 | 3.01039 | 13 |
| 10 | 4  | -4 | 18.1661 | 3.46830 | 13 |
| -9 | -4 | 4  | 7.60403 | 2.40150 | 10 |
| 9  | -4 | -4 | 10.6095 | 3.25565 | 13 |
| 9  | 4  | -4 | 7.98958 | 3.75937 | 13 |
| -9 | 4  | 4  | 10.2036 | 2.13316 | 7  |
| -8 | 4  | 4  | 23.9647 | 3.45043 | 7  |
| -8 | 4  | 4  | 25.6002 | 2.09310 | 11 |
| 8  | 4  | -4 | 14.3960 | 4.06507 | 13 |
| -7 | -4 | 4  | 15.8178 | 3.35500 | 10 |
| -7 | -4 | 4  | 12.7011 | 3.67918 | 1  |
| 7  | 4  | -4 | 19.0852 | 4.88020 | 13 |
| -7 | 4  | 4  | 19.9952 | 2.03139 | 11 |
| -6 | -4 | 4  | 117.388 | 11.0762 | 1  |
| -6 | 4  | 4  | 131.448 | 8.74907 | 4  |
| -5 | -4 | 4  | 123.626 | 10.7336 | 5  |
| -5 | -4 | 4  | 123.206 | 10.7586 | 1  |
| -5 | 4  | 4  | 123.800 | 8.54417 | 4  |
| -4 | -4 | 4  | 725.706 | 48.7736 | 1  |
| -4 | -4 | 4  | 732.105 | 49.2161 | 5  |
| -4 | 4  | 4  | 786.021 | 46.8967 | 3  |
| -4 | 4  | 4  | 798.542 | 46.8782 | 4  |
| -3 | -4 | 4  | 0.55724 | 3.01088 | 5  |
| -3 | 4  | 4  | 5.24615 | 1.33544 | 5  |
| -3 | 4  | 4  | 5.95549 | 1.18510 | 3  |
| -3 | 4  | 4  | 4.78455 | 1.46108 | 4  |
| 2  | -4 | -4 | 57.8771 | 5.30759 | 2  |
| -2 | 4  | 4  | 60.0211 | 4.35484 | 4  |

|    |    |    |         |         |    |
|----|----|----|---------|---------|----|
| -2 | 4  | 4  | 57.2854 | 4.30111 | 3  |
| -2 | 4  | 4  | 57.8378 | 5.07601 | 5  |
| 1  | -4 | -4 | 573.213 | 35.6694 | 2  |
| 1  | 4  | -4 | 554.450 | 34.9707 | 4  |
| -1 | 4  | 4  | 570.968 | 35.9849 | 5  |
| -1 | 4  | 4  | 579.265 | 34.9557 | 4  |
| 1  | 4  | -4 | 556.242 | 35.7040 | 5  |
| 0  | -4 | -4 | 1911.43 | 129.003 | 2  |
| 0  | -4 | -4 | 2010.33 | 129.360 | 5  |
| 0  | 4  | -4 | 2118.56 | 128.014 | 5  |
| 0  | 4  | -4 | 2183.50 | 128.273 | 4  |
| 0  | 4  | -4 | 2328.00 | 128.392 | 4  |
| 0  | 4  | -4 | 2214.33 | 128.090 | 5  |
| 0  | 4  | -4 | 2175.81 | 128.362 | 3  |
| 0  | 4  | -4 | 2136.68 | 128.259 | 3  |
| 0  | 4  | 4  | 1952.37 | 129.581 | 5  |
| -1 | -4 | -4 | 260.421 | 17.5767 | 2  |
| -1 | -4 | -4 | 268.300 | 17.7423 | 5  |
| -1 | 4  | -4 | 269.500 | 16.4053 | 3  |
| -1 | 4  | -4 | 266.524 | 16.5005 | 3  |
| -1 | 4  | -4 | 266.799 | 16.4058 | 4  |
| -1 | 4  | -4 | 250.541 | 16.4144 | 4  |
| -2 | -4 | -4 | 485.979 | 32.8456 | 2  |
| -2 | -4 | -4 | 502.112 | 32.8248 | 5  |
| -2 | -4 | -4 | 444.793 | 32.8145 | 1  |
| -2 | 4  | -4 | 541.682 | 31.5752 | 3  |
| -2 | 4  | -4 | 515.841 | 31.3023 | 4  |
| -2 | 4  | -4 | 556.464 | 31.3937 | 4  |
| -2 | 4  | -4 | 533.380 | 31.4864 | 3  |
| -3 | -4 | -4 | 275.342 | 19.1995 | 5  |
| -3 | -4 | -4 | 277.706 | 19.9350 | 1  |
| -3 | -4 | -4 | 282.702 | 20.1088 | 2  |
| -3 | 4  | -4 | 297.770 | 18.3998 | 3  |
| -3 | 4  | -4 | 301.043 | 18.3248 | 3  |
| -3 | 4  | -4 | 294.819 | 17.8291 | 4  |
| -3 | 4  | -4 | 315.631 | 17.8644 | 4  |
| -4 | -4 | -4 | 83.1550 | 8.03122 | 2  |
| -4 | -4 | -4 | 80.7268 | 7.30774 | 1  |
| -4 | 4  | -4 | 64.2170 | 5.33497 | 3  |
| -5 | -4 | -4 | 89.8092 | 7.51391 | 8  |
| -5 | -4 | -4 | 91.7330 | 8.65126 | 1  |
| -5 | -4 | -4 | 94.1540 | 9.90361 | 2  |
| -5 | 4  | -4 | 117.093 | 7.03365 | 8  |
| -5 | 4  | -4 | 116.350 | 6.71138 | 6  |
| -5 | 4  | -4 | 112.980 | 6.83272 | 9  |
| -5 | 4  | -4 | 116.712 | 7.72734 | 3  |
| -6 | -4 | -4 | 37.8474 | 4.00372 | 8  |
| -6 | -4 | -4 | 37.6300 | 5.01099 | 10 |
| -6 | -4 | -4 | 37.8909 | 4.34296 | 10 |
| -6 | 4  | -4 | 55.3146 | 3.38815 | 9  |

|    |    |    |         |         |    |
|----|----|----|---------|---------|----|
| -6 | 4  | -4 | 55.8849 | 3.13121 | 6  |
| -7 | -4 | -4 | 198.774 | 12.7336 | 8  |
| -7 | 4  | -4 | 192.992 | 11.8725 | 6  |
| -7 | 4  | -4 | 184.348 | 12.0678 | 9  |
| 7  | 4  | 4  | 192.647 | 14.3763 | 13 |
| -8 | -4 | -4 | 38.5171 | 3.80691 | 8  |
| -8 | 4  | -4 | 43.6880 | 2.85653 | 6  |
| 8  | 4  | 4  | 38.2170 | 6.20088 | 13 |
| -8 | 4  | -4 | 46.2092 | 3.28987 | 9  |
| 9  | 4  | 4  | 0.16711 | 2.71814 | 13 |
| 10 | 5  | -4 | 10.2369 | 3.09972 | 13 |
| -9 | -5 | 4  | 1.66700 | 1.88261 | 10 |
| 9  | 5  | -4 | 2.34392 | 3.52048 | 13 |
| -9 | 5  | 4  | 4.45604 | 1.80828 | 7  |
| -8 | -5 | 4  | 100.519 | 7.79642 | 10 |
| 8  | 5  | -4 | 99.3909 | 9.19564 | 13 |
| -8 | 5  | 4  | 79.4866 | 7.00446 | 7  |
| -7 | -5 | 4  | 51.8328 | 7.42425 | 1  |
| -7 | -5 | 4  | 53.4949 | 5.59535 | 10 |
| 7  | 5  | -4 | 47.9778 | 7.38741 | 13 |
| -7 | 5  | 4  | 51.3916 | 3.71716 | 11 |
| 7  | 5  | -4 | 44.9071 | 6.43313 | 13 |
| -6 | -5 | 4  | 119.779 | 11.5118 | 1  |
| -5 | -5 | 4  | 243.679 | 17.8090 | 1  |
| -5 | -5 | 4  | 235.454 | 17.7213 | 5  |
| -5 | 5  | 4  | 226.031 | 15.0925 | 4  |
| -4 | -5 | 4  | 2067.92 | 132.174 | 5  |
| -4 | -5 | 4  | 2055.17 | 131.668 | 1  |
| -4 | 5  | 4  | 2263.79 | 129.598 | 3  |
| -3 | 5  | 4  | 111.316 | 7.46633 | 4  |
| -3 | 5  | 4  | 106.547 | 7.35894 | 3  |
| 2  | -5 | -4 | 468.922 | 30.6763 | 2  |
| -2 | 5  | 4  | 479.211 | 29.6681 | 4  |
| -2 | 5  | 4  | 477.698 | 30.2077 | 5  |
| -2 | 5  | 4  | 490.312 | 29.6696 | 3  |
| 1  | -5 | -4 | 92.6618 | 7.42778 | 2  |
| -1 | 5  | 4  | 101.394 | 6.59858 | 4  |
| -1 | 5  | 4  | 89.8775 | 7.55758 | 5  |
| 0  | -5 | -4 | 631.394 | 39.8115 | 5  |
| 0  | -5 | -4 | 617.331 | 39.5301 | 2  |
| 0  | 5  | -4 | 629.909 | 38.4697 | 4  |
| 0  | 5  | 4  | 636.918 | 40.0347 | 5  |
| 0  | 5  | -4 | 612.177 | 38.4664 | 3  |
| 0  | 5  | -4 | 614.421 | 38.5175 | 4  |
| 0  | 5  | -4 | 651.117 | 38.5675 | 3  |
| -1 | -5 | -4 | 35.3307 | 4.51397 | 2  |
| -1 | -5 | -4 | 34.8463 | 4.51112 | 5  |
| -1 | 5  | -4 | 39.7232 | 2.84039 | 3  |
| -1 | 5  | -4 | 35.0812 | 2.88216 | 3  |
| -1 | 5  | -4 | 43.7397 | 2.92558 | 4  |



|    |    |    |         |         |    |
|----|----|----|---------|---------|----|
| -1 | 5  | -4 | 34.1384 | 2.79284 | 4  |
| -2 | -5 | -4 | 237.359 | 15.9175 | 5  |
| -2 | -5 | -4 | 234.038 | 15.8558 | 2  |
| -2 | -5 | -4 | 217.416 | 15.9624 | 1  |
| -2 | 5  | -4 | 213.912 | 14.0520 | 3  |
| -2 | 5  | -4 | 228.867 | 13.8390 | 4  |
| -2 | 5  | -4 | 227.150 | 14.1492 | 3  |
| -2 | 5  | -4 | 217.859 | 13.7994 | 4  |
| -3 | -5 | -4 | 349.645 | 23.7769 | 1  |
| -3 | -5 | -4 | 361.101 | 23.3531 | 5  |
| -3 | -5 | -4 | 356.155 | 23.9229 | 2  |
| -3 | 5  | -4 | 354.626 | 21.8640 | 3  |
| -3 | 5  | -4 | 335.166 | 21.7562 | 3  |
| -4 | -5 | -4 | 90.2361 | 8.82914 | 2  |
| -4 | -5 | -4 | 95.0860 | 8.74565 | 1  |
| -4 | 5  | -4 | 97.6069 | 6.60213 | 3  |
| -5 | -5 | -4 | 146.000 | 12.6487 | 2  |
| -5 | -5 | -4 | 145.733 | 11.6698 | 1  |
| -5 | -5 | -4 | 143.133 | 9.86353 | 8  |
| -5 | 5  | -4 | 142.165 | 8.88619 | 6  |
| -5 | 5  | -4 | 145.633 | 9.72146 | 3  |
| -5 | 5  | -4 | 139.823 | 8.97698 | 9  |
| -6 | -5 | -4 | 3.35721 | 2.28191 | 10 |
| -6 | -5 | -4 | 2.52510 | 1.87098 | 10 |
| -6 | -5 | -4 | 2.55407 | 1.64258 | 8  |
| -6 | 5  | -4 | 5.22452 | 0.89415 | 9  |
| -6 | 5  | -4 | 2.48045 | 0.58414 | 6  |
| 6  | 5  | 4  | 3.42730 | 3.34511 | 13 |
| -6 | 5  | -4 | 3.47925 | 0.93580 | 9  |
| -7 | -5 | -4 | 40.4890 | 4.69001 | 10 |
| -7 | -5 | -4 | 41.1877 | 4.38545 | 8  |
| -7 | 5  | -4 | 50.1900 | 3.17315 | 6  |
| -7 | 5  | -4 | 49.1818 | 3.55719 | 9  |
| 7  | 5  | 4  | 63.8766 | 7.44315 | 13 |
| -8 | -5 | -4 | 10.4827 | 1.87121 | 8  |
| 8  | 5  | 4  | 13.5005 | 3.71459 | 13 |
| -8 | 5  | -4 | 10.3646 | 1.03423 | 6  |
| -8 | 5  | -4 | 11.1654 | 1.36196 | 9  |
| 9  | 5  | 4  | 7.76342 | 2.51245 | 13 |
| 10 | 6  | -4 | 6.10055 | 2.80404 | 13 |
| -9 | 6  | 4  | 10.9188 | 2.00858 | 7  |
| -8 | -6 | 4  | 286.867 | 19.7340 | 10 |
| -8 | 6  | 4  | 296.378 | 19.1010 | 7  |
| 8  | 6  | -4 | 300.412 | 20.4406 | 13 |
| -7 | -6 | 4  | 14.0231 | 4.92046 | 1  |
| -7 | -6 | 4  | 18.9317 | 3.90478 | 10 |
| -7 | 6  | 4  | 17.6715 | 1.88197 | 11 |
| 7  | 6  | -4 | 14.2358 | 4.70149 | 13 |
| -6 | -6 | 4  | 259.299 | 19.7810 | 1  |
| -5 | -6 | 4  | 212.245 | 15.7885 | 5  |

|    |    |    |         |         |    |
|----|----|----|---------|---------|----|
| -5 | -6 | 4  | 191.300 | 15.1503 | 1  |
| -5 | 6  | 4  | 170.248 | 12.8688 | 3  |
| -5 | 6  | 4  | 178.081 | 12.1803 | 4  |
| -4 | -6 | 4  | 165.869 | 13.0400 | 1  |
| -4 | -6 | 4  | 161.942 | 13.7404 | 5  |
| -4 | 6  | 4  | 152.983 | 10.3485 | 4  |
| -4 | 6  | 4  | 150.807 | 10.4203 | 3  |
| 3  | -6 | -4 | 91.3594 | 7.81787 | 2  |
| -3 | -6 | 4  | 83.2181 | 8.33465 | 1  |
| -3 | 6  | 4  | 89.8100 | 6.23731 | 4  |
| -3 | 6  | 4  | 88.0737 | 6.20675 | 3  |
| 2  | -6 | -4 | 239.029 | 16.4555 | 2  |
| -2 | 6  | 4  | 242.725 | 15.4992 | 5  |
| -2 | 6  | 4  | 238.587 | 15.1989 | 3  |
| -2 | 6  | 4  | 233.554 | 15.1861 | 4  |
| 1  | -6 | -4 | 277.207 | 19.5854 | 2  |
| 1  | 6  | -4 | 310.514 | 18.5990 | 4  |
| -1 | 6  | 4  | 293.672 | 18.5992 | 4  |
| -1 | 6  | 4  | 293.779 | 19.5262 | 5  |
| 1  | 6  | -4 | 296.144 | 19.0039 | 5  |
| 0  | -6 | -4 | 601.706 | 36.3510 | 2  |
| 0  | 6  | 4  | 591.643 | 36.6257 | 5  |
| 0  | 6  | -4 | 562.676 | 35.0588 | 4  |
| 0  | 6  | -4 | 563.913 | 35.0843 | 3  |
| 0  | 6  | -4 | 536.675 | 34.9956 | 4  |
| -1 | -6 | -4 | 454.197 | 28.0644 | 2  |
| -1 | -6 | -4 | 435.215 | 28.2368 | 5  |
| -1 | 6  | -4 | 418.501 | 26.5517 | 3  |
| -1 | 6  | -4 | 413.571 | 26.4627 | 3  |
| -1 | 6  | -4 | 420.462 | 26.3863 | 4  |
| -1 | 6  | -4 | 443.758 | 26.4189 | 4  |
| -2 | -6 | -4 | 30.0492 | 4.26692 | 5  |
| -2 | -6 | -4 | 33.8297 | 4.79062 | 2  |
| -2 | -6 | -4 | 33.0445 | 4.64536 | 1  |
| -2 | 6  | -4 | 32.8681 | 2.57323 | 3  |
| -2 | 6  | -4 | 32.7743 | 2.48211 | 3  |
| -3 | -6 | -4 | 185.087 | 14.0707 | 2  |
| -3 | -6 | -4 | 182.577 | 13.6779 | 5  |
| -3 | -6 | -4 | 184.320 | 14.0584 | 1  |
| -3 | 6  | -4 | 177.686 | 11.6718 | 3  |
| -3 | 6  | -4 | 195.558 | 11.8099 | 3  |
| -4 | -6 | -4 | 130.719 | 9.92188 | 5  |
| -4 | -6 | -4 | 135.900 | 11.8823 | 2  |
| -4 | -6 | -4 | 136.328 | 11.5651 | 1  |
| -4 | 6  | -4 | 150.952 | 8.74954 | 6  |
| -4 | 6  | -4 | 149.586 | 9.34281 | 3  |
| -5 | -6 | -4 | 5.40433 | 1.69231 | 8  |
| -5 | -6 | -4 | 7.00987 | 3.45922 | 2  |
| -5 | -6 | -4 | 2.76987 | 2.91976 | 10 |
| -5 | -6 | -4 | 5.66377 | 3.03202 | 1  |

|    |    |    |         |         |    |
|----|----|----|---------|---------|----|
| -5 | 6  | -4 | 0.72407 | 0.46735 | 6  |
| -5 | 6  | -4 | 0.99433 | 0.65779 | 9  |
| -5 | 6  | -4 | 1.26719 | 0.66224 | 9  |
| -6 | -6 | -4 | 5.66180 | 2.15166 | 8  |
| -6 | -6 | -4 | 5.04845 | 2.09349 | 10 |
| -6 | -6 | -4 | 4.56202 | 2.43183 | 10 |
| -6 | 6  | -4 | 1.90654 | 0.82728 | 9  |
| 6  | 6  | 4  | 4.41643 | 3.53592 | 13 |
| -7 | -6 | -4 | 106.043 | 7.98323 | 8  |
| -7 | -6 | -4 | 100.216 | 8.08322 | 10 |
| 7  | 6  | 4  | 99.5338 | 9.93668 | 13 |
| -7 | 6  | -4 | 122.515 | 7.19274 | 9  |
| -7 | 6  | -4 | 119.019 | 6.93309 | 6  |
| -8 | -6 | -4 | 36.1880 | 3.77235 | 8  |
| -8 | 6  | -4 | 37.9773 | 2.73055 | 9  |
| -8 | 6  | -4 | 38.7046 | 2.44288 | 6  |
| -8 | 6  | -4 | 36.4006 | 2.44693 | 6  |
| 8  | 6  | 4  | 36.3005 | 5.83626 | 13 |
| 9  | 6  | 4  | -0.0152 | 2.16307 | 13 |
| 10 | 7  | -4 | 31.3730 | 4.52868 | 13 |
| -9 | -7 | 4  | 11.3164 | 2.61466 | 10 |
| 9  | 7  | -4 | 12.8018 | 3.94226 | 13 |
| -9 | 7  | 4  | 19.2823 | 2.99213 | 7  |
| -8 | -7 | 4  | 35.6803 | 5.52431 | 1  |
| -8 | -7 | 4  | 36.1970 | 5.07515 | 10 |
| 8  | 7  | -4 | 45.8319 | 8.23894 | 13 |
| -7 | -7 | 4  | 0.05700 | 2.27044 | 10 |
| -7 | -7 | 4  | 1.24179 | 4.14351 | 1  |
| 7  | 7  | -4 | 0.89298 | 4.15003 | 13 |
| -7 | 7  | 4  | 0.91740 | 0.66461 | 11 |
| -7 | 7  | 4  | -0.6173 | 1.62347 | 7  |
| -6 | -7 | 4  | 42.4262 | 6.86519 | 1  |
| -5 | -7 | 4  | 88.7766 | 9.53035 | 1  |
| -5 | -7 | 4  | 85.1438 | 9.87010 | 5  |
| -5 | 7  | 4  | 95.5680 | 6.45042 | 4  |
| -5 | 7  | 4  | 96.9001 | 6.76786 | 3  |
| 4  | -7 | -4 | 33.1018 | 5.07047 | 2  |
| -4 | -7 | 4  | 46.8896 | 6.11469 | 1  |
| -4 | 7  | 4  | 35.4730 | 3.13612 | 4  |
| -4 | 7  | 4  | 32.2656 | 3.09531 | 3  |
| 3  | -7 | -4 | 209.160 | 14.4886 | 2  |
| -3 | -7 | 4  | 167.840 | 14.6061 | 1  |
| -3 | 7  | 4  | 202.971 | 12.6995 | 3  |
| -3 | 7  | 4  | 199.607 | 12.6406 | 4  |
| 2  | -7 | -4 | 536.473 | 34.2705 | 2  |
| -2 | 7  | 4  | 521.338 | 32.9276 | 4  |
| -2 | 7  | 4  | 536.819 | 32.9348 | 3  |
| 1  | 7  | -4 | 12.0340 | 1.80958 | 4  |
| 1  | 7  | -4 | 11.7162 | 1.68002 | 4  |
| 1  | 7  | -4 | 11.4876 | 2.12265 | 5  |

|    |    |    |         |         |    |
|----|----|----|---------|---------|----|
| 0  | -7 | -4 | 16.4724 | 3.05421 | 2  |
| 0  | 7  | -4 | 10.0357 | 1.43506 | 4  |
| 0  | 7  | -4 | 9.74690 | 1.42118 | 4  |
| 0  | 7  | -4 | 8.14592 | 1.36005 | 4  |
| -1 | -7 | -4 | 472.065 | 32.1240 | 2  |
| -1 | 7  | -4 | 496.790 | 30.3838 | 4  |
| -1 | 7  | -4 | 515.519 | 30.5315 | 3  |
| -1 | 7  | -4 | 495.928 | 30.5697 | 3  |
| -1 | 7  | -4 | 501.821 | 30.3749 | 4  |
| -2 | -7 | -4 | 65.5216 | 6.78125 | 5  |
| -2 | -7 | -4 | 69.5243 | 6.77749 | 2  |
| -2 | -7 | -4 | 63.7698 | 7.30931 | 1  |
| -2 | 7  | -4 | 76.4315 | 4.88262 | 3  |
| -2 | 7  | -4 | 75.2332 | 4.79452 | 3  |
| -3 | -7 | -4 | 30.3285 | 4.71012 | 2  |
| -3 | -7 | -4 | 26.7350 | 5.10979 | 1  |
| -3 | -7 | -4 | 28.9049 | 4.66759 | 5  |
| -3 | 7  | -4 | 25.1891 | 2.16690 | 3  |
| -3 | 7  | -4 | 29.7342 | 2.33946 | 3  |
| -4 | -7 | -4 | 29.5273 | 5.38264 | 2  |
| -4 | -7 | -4 | 26.6387 | 5.05930 | 1  |
| -4 | 7  | -4 | 31.6145 | 2.57964 | 3  |
| -4 | 7  | -4 | 28.9461 | 2.00999 | 6  |
| -4 | 7  | -4 | 31.3490 | 2.02856 | 6  |
| -5 | -7 | -4 | 8.03769 | 2.12889 | 8  |
| -5 | -7 | -4 | 6.06785 | 3.49091 | 1  |
| -5 | -7 | -4 | 6.55093 | 4.11689 | 2  |
| -5 | 7  | -4 | 6.11128 | 0.72052 | 6  |
| -6 | -7 | -4 | 153.434 | 10.8100 | 8  |
| -6 | -7 | -4 | 151.443 | 11.2824 | 10 |
| -6 | -7 | -4 | 156.067 | 11.4421 | 10 |
| 6  | 7  | 4  | 166.838 | 13.1073 | 13 |
| -6 | 7  | -4 | 160.289 | 9.70980 | 6  |
| -6 | 7  | -4 | 160.069 | 9.86761 | 9  |
| -6 | 7  | -4 | 154.211 | 11.1365 | 12 |
| -7 | -7 | -4 | 84.2483 | 7.08617 | 10 |
| -7 | -7 | -4 | 83.1239 | 6.62272 | 8  |
| 7  | 7  | 4  | 73.2890 | 8.80742 | 13 |
| -7 | 7  | -4 | 90.7492 | 5.66019 | 9  |
| -7 | 7  | -4 | 92.5484 | 5.43513 | 6  |
| -8 | -7 | -4 | 4.70569 | 1.59875 | 8  |
| -8 | 7  | -4 | 2.11147 | 0.34424 | 6  |
| -8 | 7  | -4 | 1.26757 | 0.66458 | 9  |
| -8 | 7  | -4 | 2.24264 | 0.33997 | 6  |
| 10 | 8  | -4 | 27.8411 | 4.59671 | 13 |
| -9 | -8 | 4  | 0.29679 | 2.03240 | 10 |
| 9  | 8  | -4 | 2.19420 | 3.34476 | 13 |
| -9 | 8  | 4  | 3.54973 | 1.75724 | 7  |
| -8 | -8 | 4  | 1.61076 | 2.50289 | 10 |
| -8 | 8  | 4  | 1.28442 | 1.84790 | 7  |

|    |    |    |         |         |    |
|----|----|----|---------|---------|----|
| 8  | 8  | -4 | -7.9939 | 4.40231 | 13 |
| -7 | -8 | 4  | 1.22071 | 4.33791 | 1  |
| -7 | -8 | 4  | 1.38747 | 2.51188 | 10 |
| -7 | 8  | 4  | 1.45004 | 1.70191 | 7  |
| 7  | 8  | -4 | -2.1985 | 4.00841 | 13 |
| 6  | -8 | -4 | 116.270 | 11.6197 | 2  |
| -6 | -8 | 4  | 139.054 | 9.89582 | 10 |
| -6 | -8 | 4  | 132.900 | 12.0644 | 1  |
| -6 | 8  | 4  | 107.253 | 8.30971 | 7  |
| -6 | 8  | 4  | 104.141 | 7.44303 | 11 |
| -5 | -8 | 4  | 49.0829 | 7.70860 | 5  |
| -5 | -8 | 4  | 48.3763 | 7.12441 | 1  |
| 5  | -8 | -4 | 46.9747 | 6.65686 | 2  |
| -5 | 8  | 4  | 48.9267 | 3.64486 | 4  |
| -5 | 8  | 4  | 45.3509 | 3.73640 | 4  |
| -5 | 8  | 4  | 43.1775 | 3.93479 | 3  |
| 4  | -8 | -4 | 22.4593 | 4.31346 | 2  |
| -4 | -8 | 4  | 29.6318 | 5.41651 | 1  |
| -4 | 8  | 4  | 21.5978 | 2.36958 | 3  |
| -4 | 8  | 4  | 20.2164 | 2.44100 | 4  |
| -3 | -8 | 4  | 140.698 | 12.7706 | 1  |
| 3  | -8 | -4 | 110.672 | 9.80369 | 2  |
| -3 | 8  | 4  | 118.204 | 8.05818 | 4  |
| -3 | 8  | 4  | 114.372 | 8.06668 | 3  |
| 2  | -8 | -4 | 27.3217 | 4.45106 | 2  |
| -2 | 8  | 4  | 31.4519 | 2.86578 | 4  |
| -2 | 8  | 4  | 29.4872 | 2.79418 | 3  |
| 1  | -8 | -4 | 34.4009 | 4.83085 | 2  |
| -1 | 8  | 4  | 33.7863 | 3.53813 | 4  |
| 1  | 8  | -4 | 43.9901 | 3.52636 | 5  |
| 1  | 8  | -4 | 43.9036 | 3.56040 | 4  |
| -1 | 8  | 4  | 44.9654 | 4.59154 | 5  |
| 0  | -8 | -4 | 363.312 | 22.9901 | 2  |
| 0  | 8  | 4  | 350.430 | 22.8171 | 5  |
| 0  | 8  | -4 | 316.716 | 21.1865 | 4  |
| 0  | 8  | -4 | 337.640 | 21.2590 | 4  |
| -1 | 8  | -4 | 66.6985 | 4.72726 | 3  |
| -1 | 8  | -4 | 69.7971 | 4.55749 | 4  |
| -1 | 8  | -4 | 70.5856 | 4.56220 | 4  |
| -2 | -8 | -4 | 94.1478 | 8.23770 | 5  |
| -2 | -8 | -4 | 89.8115 | 8.28748 | 1  |
| -2 | -8 | -4 | 90.0565 | 7.95473 | 2  |
| -2 | 8  | -4 | 79.4956 | 5.69669 | 3  |
| -2 | 8  | -4 | 81.5931 | 5.63000 | 3  |
| -3 | -8 | -4 | 10.4964 | 3.25555 | 2  |
| -3 | -8 | -4 | 8.81213 | 2.98216 | 5  |
| -3 | -8 | -4 | 9.08454 | 3.20930 | 1  |
| -3 | 8  | -4 | 13.4376 | 1.33679 | 3  |
| -3 | 8  | -4 | 12.9456 | 1.39897 | 3  |
| -4 | -8 | -4 | 9.46723 | 3.46460 | 1  |

|    |    |    |         |         |    |
|----|----|----|---------|---------|----|
| -4 | -8 | -4 | 10.3714 | 4.18871 | 2  |
| -4 | 8  | -4 | 10.2824 | 0.92902 | 6  |
| -4 | 8  | -4 | 10.6799 | 1.34736 | 3  |
| -4 | 8  | -4 | 10.9798 | 0.88503 | 6  |
| -5 | -8 | -4 | 1.66293 | 3.18745 | 2  |
| -5 | -8 | -4 | 8.48398 | 2.80906 | 10 |
| -5 | -8 | -4 | 5.52168 | 1.94224 | 8  |
| -5 | -8 | -4 | 4.02558 | 3.60430 | 1  |
| -5 | 8  | -4 | 5.68758 | 0.83242 | 9  |
| -5 | 8  | -4 | 5.15809 | 0.62374 | 6  |
| -5 | 8  | -4 | 5.75929 | 3.23565 | 12 |
| -5 | 8  | -4 | 7.01600 | 0.71828 | 6  |
| -6 | -8 | -4 | 7.35258 | 3.35868 | 1  |
| -6 | -8 | -4 | 5.82464 | 2.50666 | 10 |
| -6 | -8 | -4 | 7.43578 | 2.87020 | 10 |
| -6 | -8 | -4 | 5.61886 | 2.07440 | 8  |
| 6  | 8  | 4  | 6.62500 | 3.63010 | 13 |
| -7 | -8 | -4 | 230.309 | 14.9560 | 8  |
| -7 | -8 | -4 | 221.908 | 15.1858 | 10 |
| -7 | 8  | -4 | 225.816 | 13.8083 | 6  |
| 7  | 8  | 4  | 237.636 | 16.9661 | 13 |
| -7 | 8  | -4 | 217.387 | 13.8058 | 6  |
| -7 | 8  | -4 | 230.263 | 13.9832 | 9  |
| -8 | -8 | -4 | 32.3226 | 3.23285 | 8  |
| -8 | 8  | -4 | 26.6140 | 1.85477 | 9  |
| -8 | 8  | -4 | 26.8056 | 1.87780 | 9  |
| -9 | -9 | 4  | 6.91502 | 2.50311 | 10 |
| -9 | 9  | 4  | 5.80209 | 0.89817 | 9  |
| -9 | 9  | 4  | 7.92214 | 2.01784 | 7  |
| 9  | 9  | -4 | 8.56417 | 4.11457 | 13 |
| -9 | 9  | 4  | 5.94165 | 0.72548 | 6  |
| -8 | -9 | 4  | 11.0132 | 2.54265 | 10 |
| 8  | 9  | -4 | 13.9716 | 4.77554 | 13 |
| -8 | 9  | 4  | 8.38593 | 2.26570 | 7  |
| -7 | -9 | 4  | 13.8555 | 4.79961 | 1  |
| -7 | -9 | 4  | 15.6150 | 3.44535 | 10 |
| -7 | 9  | 4  | 7.90661 | 2.22345 | 7  |
| 7  | 9  | -4 | 12.5862 | 3.86306 | 13 |
| 6  | -9 | -4 | 29.4685 | 5.93963 | 2  |
| -6 | -9 | 4  | 20.8231 | 3.82993 | 10 |
| -6 | -9 | 4  | 25.5636 | 6.36359 | 1  |
| -6 | 9  | 4  | 26.2579 | 2.00215 | 11 |
| -6 | 9  | 4  | 26.1861 | 3.23098 | 7  |
| 5  | -9 | -4 | 26.0417 | 5.57225 | 2  |
| -5 | 9  | 4  | 22.1917 | 2.04890 | 4  |
| -5 | 9  | 4  | 22.8375 | 2.11619 | 4  |
| -5 | 9  | 4  | 23.6929 | 2.79151 | 3  |
| -5 | 9  | 4  | 27.8557 | 3.36940 | 7  |
| -4 | -9 | 4  | 23.6349 | 5.02958 | 1  |
| 4  | -9 | -4 | 25.5912 | 4.88070 | 2  |

|    |    |    |         |         |    |
|----|----|----|---------|---------|----|
| -4 | 9  | 4  | 23.0990 | 2.46419 | 3  |
| -4 | 9  | 4  | 20.3395 | 2.36715 | 4  |
| 3  | -9 | -4 | 66.0220 | 7.27899 | 2  |
| -3 | 9  | 4  | 63.8053 | 4.85772 | 4  |
| -3 | 9  | 4  | 65.4535 | 4.92159 | 3  |
| 2  | -9 | -4 | 369.586 | 24.9252 | 2  |
| -2 | 9  | 4  | 363.076 | 23.0303 | 4  |
| 1  | -9 | -4 | 52.0075 | 5.97165 | 2  |
| -1 | 9  | 4  | 54.6539 | 5.27123 | 4  |
| 0  | -9 | -4 | 597.652 | 35.2592 | 2  |
| 0  | 9  | -4 | 517.560 | 33.1606 | 4  |
| 0  | 9  | -4 | 506.769 | 33.1418 | 4  |
| -1 | -9 | -4 | 484.075 | 29.6599 | 2  |
| -1 | -9 | -4 | 426.911 | 29.5285 | 1  |
| -1 | 9  | -4 | 427.738 | 27.3129 | 3  |
| -1 | 9  | -4 | 432.833 | 27.0480 | 4  |
| -1 | 9  | -4 | 446.999 | 27.0547 | 4  |
| -2 | -9 | -4 | 95.6039 | 9.21703 | 1  |
| -2 | -9 | -4 | 93.4662 | 8.84974 | 2  |
| -2 | 9  | -4 | 109.868 | 6.62207 | 3  |
| -3 | -9 | -4 | 80.1625 | 7.97355 | 5  |
| -3 | -9 | -4 | 80.9314 | 8.11983 | 1  |
| -3 | -9 | -4 | 85.0742 | 8.14735 | 2  |
| -3 | 9  | -4 | 66.0472 | 4.79858 | 3  |
| -3 | 9  | -4 | 66.9389 | 4.83271 | 3  |
| -4 | -9 | -4 | 81.8514 | 8.86627 | 2  |
| -4 | 9  | -4 | 55.3183 | 4.74175 | 7  |
| -4 | 9  | -4 | 56.9505 | 3.71223 | 6  |
| -4 | 9  | -4 | 60.4565 | 4.02500 | 3  |
| -4 | 9  | -4 | 58.8449 | 3.80031 | 9  |
| -4 | 9  | -4 | 58.7640 | 3.69241 | 6  |
| -5 | -9 | -4 | 130.897 | 9.56009 | 8  |
| -5 | -9 | -4 | 138.390 | 10.4462 | 10 |
| -5 | -9 | -4 | 136.705 | 12.2877 | 1  |
| -5 | -9 | -4 | 136.262 | 12.8157 | 2  |
| -5 | 9  | -4 | 134.073 | 10.0353 | 12 |
| -5 | 9  | -4 | 132.251 | 8.37478 | 9  |
| 5  | 9  | 4  | 152.193 | 11.9018 | 13 |
| -5 | 9  | -4 | 132.210 | 8.27534 | 6  |
| -5 | 9  | -4 | 129.609 | 8.24953 | 6  |
| -6 | -9 | -4 | 0.30644 | 1.84026 | 8  |
| -6 | -9 | -4 | -0.5535 | 2.48234 | 10 |
| -6 | -9 | -4 | 0.11187 | 3.04837 | 1  |
| -6 | 9  | -4 | 1.44857 | 0.35855 | 6  |
| -6 | 9  | -4 | 1.20900 | 0.39349 | 6  |
| -6 | 9  | -4 | 0.85113 | 0.63731 | 9  |
| -6 | 9  | -4 | 2.26414 | 2.31204 | 12 |
| 6  | 9  | 4  | 1.03036 | 3.45886 | 13 |
| -7 | -9 | -4 | 82.3029 | 7.01171 | 10 |
| -7 | -9 | -4 | 83.2831 | 6.77539 | 8  |

|    |     |    |         |         |    |
|----|-----|----|---------|---------|----|
| -7 | 9   | -4 | 88.0888 | 5.28760 | 6  |
| -7 | 9   | -4 | 92.9761 | 5.29230 | 6  |
| 7  | 9   | 4  | 77.0496 | 8.81086 | 13 |
| -8 | -9  | -4 | -0.3003 | 1.40143 | 8  |
| 8  | 9   | 4  | -0.6425 | 2.86774 | 13 |
| -9 | -10 | 4  | 3.73589 | 1.73884 | 8  |
| -9 | -10 | 4  | 3.05732 | 2.33139 | 10 |
| -9 | 10  | 4  | 4.39808 | 1.73894 | 7  |
| -9 | 10  | 4  | 3.56684 | 0.77749 | 9  |
| 9  | 10  | -4 | 2.30159 | 2.87071 | 13 |
| -9 | 10  | 4  | 3.77593 | 0.54493 | 6  |
| -8 | -10 | 4  | 38.5499 | 5.08581 | 10 |
| 8  | 10  | -4 | 49.3678 | 6.68832 | 13 |
| -8 | 10  | 4  | 36.6492 | 2.84050 | 9  |
| -8 | 10  | 4  | 31.0554 | 2.77727 | 6  |
| -8 | 10  | 4  | 39.4432 | 4.15963 | 7  |
| -7 | -10 | 4  | 5.87422 | 2.30935 | 10 |
| -7 | -10 | 4  | 4.42231 | 4.04586 | 1  |
| 7  | 10  | -4 | 3.81036 | 4.08840 | 13 |
| -7 | 10  | 4  | 4.10024 | 2.02722 | 7  |
| -7 | 10  | 4  | 4.32704 | 0.99945 | 9  |
| 6  | -10 | -4 | 74.2784 | 9.25041 | 2  |
| -6 | -10 | 4  | 87.0626 | 10.7527 | 1  |
| -6 | -10 | 4  | 77.2062 | 7.42956 | 10 |
| 6  | 10  | -4 | 76.4940 | 8.30511 | 13 |
| -6 | 10  | 4  | 72.1036 | 4.72420 | 11 |
| -6 | 10  | 4  | 75.1893 | 6.05294 | 7  |
| -6 | 10  | 4  | 76.9872 | 4.75383 | 11 |
| 5  | -10 | -4 | 23.2752 | 5.12009 | 2  |
| -5 | 10  | 4  | 26.0373 | 3.03280 | 7  |
| -5 | 10  | 4  | 25.5408 | 2.93576 | 3  |
| -4 | -10 | 4  | 3.28311 | 3.20408 | 1  |
| 4  | -10 | -4 | 5.95071 | 3.02586 | 2  |
| -4 | 10  | 4  | 2.84516 | 1.27885 | 3  |
| -4 | 10  | 4  | 2.44071 | 1.12542 | 4  |
| -4 | 10  | 4  | 4.06687 | 1.37604 | 4  |
| 3  | -10 | -4 | 31.5139 | 5.20274 | 2  |
| -3 | 10  | 4  | 34.0051 | 3.10294 | 3  |
| -3 | 10  | 4  | 32.9517 | 3.03119 | 4  |
| 2  | -10 | -4 | 99.8567 | 8.84121 | 2  |
| -2 | 10  | 4  | 90.9170 | 6.69011 | 4  |
| 1  | -10 | -4 | 235.628 | 16.2517 | 2  |
| 1  | 10  | -4 | 209.520 | 14.3104 | 4  |
| 0  | 10  | -4 | 32.7985 | 2.82528 | 4  |
| 0  | 10  | -4 | 32.2309 | 2.76942 | 4  |
| -1 | 10  | -4 | 104.717 | 6.65920 | 4  |
| -1 | 10  | -4 | 106.283 | 6.65781 | 4  |
| -2 | -10 | -4 | 62.7655 | 7.57957 | 1  |
| -2 | -10 | -4 | 68.7429 | 7.50159 | 2  |
| -2 | 10  | -4 | 84.0768 | 5.06129 | 3  |



|    |     |    |         |         |    |
|----|-----|----|---------|---------|----|
| -3 | -10 | -4 | 25.1310 | 5.10610 | 5  |
| -3 | -10 | -4 | 24.5996 | 4.98755 | 2  |
| -3 | -10 | -4 | 23.8479 | 5.23569 | 1  |
| -3 | 10  | -4 | 31.4743 | 2.19341 | 3  |
| -4 | -10 | -4 | 37.8651 | 6.97790 | 2  |
| -4 | -10 | -4 | 38.4702 | 6.58756 | 1  |
| -4 | 10  | -4 | 42.7380 | 2.95297 | 9  |
| -4 | 10  | -4 | 45.1262 | 2.79701 | 6  |
| -4 | 10  | -4 | 46.7647 | 2.90920 | 9  |
| -4 | 10  | -4 | 47.2075 | 2.82201 | 6  |
| -5 | -10 | -4 | 26.1788 | 6.19593 | 1  |
| -5 | -10 | -4 | 31.5618 | 4.93332 | 10 |
| -5 | -10 | -4 | 34.8844 | 3.93912 | 8  |
| 5  | 10  | 4  | 40.3711 | 7.22613 | 13 |
| -6 | -10 | -4 | 150.560 | 10.7019 | 8  |
| -6 | -10 | -4 | 151.826 | 11.3300 | 10 |
| -6 | -10 | -4 | 153.769 | 13.2054 | 1  |
| -6 | -10 | -4 | 156.385 | 11.5132 | 10 |
| -6 | 10  | -4 | 159.255 | 9.26069 | 6  |
| -6 | 10  | -4 | 153.908 | 11.3882 | 12 |
| 6  | 10  | 4  | 141.802 | 12.2390 | 13 |
| -6 | 10  | -4 | 153.098 | 9.39030 | 9  |
| -6 | 10  | -4 | 152.181 | 9.40065 | 9  |
| -6 | 10  | -4 | 145.752 | 9.24635 | 6  |
| -7 | -10 | -4 | 4.68624 | 2.20147 | 10 |
| -7 | -10 | -4 | 3.70421 | 2.01952 | 8  |
| -7 | 10  | -4 | 2.58353 | 2.38733 | 12 |
| 7  | 10  | 4  | 4.10872 | 3.68066 | 13 |
| -8 | -10 | -4 | 25.5370 | 2.99908 | 8  |
| -8 | -10 | -4 | 23.1891 | 2.56729 | 10 |
| 8  | 10  | 4  | 26.5130 | 4.77180 | 13 |
| -9 | -11 | 4  | 0.72925 | 2.21496 | 10 |
| -9 | 11  | 4  | -0.0108 | 1.50334 | 7  |
| -9 | 11  | 4  | 0.37689 | 0.55248 | 9  |
| -8 | -11 | 4  | 10.9240 | 3.13207 | 10 |
| 8  | 11  | -4 | 9.99689 | 3.64479 | 13 |
| -8 | 11  | 4  | 12.9907 | 1.45936 | 9  |
| -8 | 11  | 4  | 15.1796 | 2.55109 | 7  |
| -8 | 11  | 4  | 13.3961 | 1.30143 | 6  |
| -7 | -11 | 4  | 13.3931 | 4.93095 | 1  |
| -7 | -11 | 4  | 13.4729 | 3.50087 | 10 |
| 7  | 11  | -4 | 15.4814 | 4.60024 | 13 |
| -7 | 11  | 4  | 18.7440 | 1.83828 | 9  |
| -7 | 11  | 4  | 20.9304 | 3.25132 | 7  |
| -6 | -11 | 4  | 174.110 | 13.2744 | 10 |
| -6 | -11 | 4  | 203.157 | 17.0876 | 1  |
| -6 | 11  | 4  | 171.229 | 11.1775 | 9  |
| -6 | 11  | 4  | 164.364 | 12.0079 | 7  |
| -5 | -11 | 4  | 77.2216 | 10.1219 | 1  |
| 5  | -11 | -4 | 97.7214 | 9.94110 | 2  |

|    |     |    |         |         |    |
|----|-----|----|---------|---------|----|
| -5 | 11  | 4  | 93.7700 | 6.72889 | 3  |
| -5 | 11  | 4  | 87.2299 | 6.61159 | 7  |
| 4  | -11 | -4 | 62.7688 | 7.63271 | 2  |
| -4 | 11  | 4  | 61.1295 | 4.65345 | 4  |
| -4 | 11  | 4  | 66.4316 | 5.10944 | 3  |
| 3  | -11 | -4 | 2.80274 | 3.28364 | 2  |
| -3 | 11  | 4  | 3.38482 | 1.23701 | 4  |
| -3 | 11  | 4  | 5.74365 | 1.38061 | 3  |
| 2  | -11 | -4 | 201.001 | 15.1682 | 2  |
| -2 | 11  | 4  | 195.191 | 12.9912 | 4  |
| 1  | -11 | -4 | 859.672 | 51.9981 | 2  |
| 1  | 11  | -4 | 761.055 | 49.7794 | 4  |
| 0  | -11 | -4 | 167.266 | 13.9057 | 2  |
| 0  | 11  | -4 | 183.526 | 11.6445 | 4  |
| 0  | 11  | -4 | 187.999 | 11.8715 | 4  |
| -1 | -11 | -4 | 21.4964 | 4.62755 | 2  |
| -1 | 11  | -4 | 22.6830 | 1.56253 | 4  |
| -2 | -11 | -4 | 82.5116 | 8.83371 | 1  |
| -2 | -11 | -4 | 86.0722 | 8.67138 | 2  |
| -2 | 11  | -4 | 93.4315 | 5.94656 | 3  |
| -3 | -11 | -4 | 529.766 | 34.9512 | 1  |
| -3 | -11 | -4 | 527.173 | 34.7205 | 2  |
| -3 | 11  | -4 | 481.050 | 30.6396 | 6  |
| -3 | 11  | -4 | 516.388 | 30.6513 | 6  |
| -3 | 11  | -4 | 483.884 | 30.9241 | 3  |
| -4 | -11 | -4 | 15.3707 | 4.41516 | 2  |
| -4 | -11 | -4 | 14.8825 | 3.42559 | 10 |
| -4 | -11 | -4 | 16.8837 | 4.86681 | 1  |
| -4 | 11  | -4 | 16.0971 | 1.21945 | 9  |
| -4 | 11  | -4 | 14.3763 | 1.28183 | 9  |
| -4 | 11  | -4 | 15.7036 | 1.09908 | 6  |
| -4 | 11  | -4 | 16.1726 | 1.06406 | 6  |
| -5 | -11 | -4 | 280.384 | 20.7367 | 1  |
| -5 | -11 | -4 | 277.662 | 17.7943 | 10 |
| -5 | 11  | -4 | 240.922 | 15.5305 | 9  |
| -5 | 11  | -4 | 249.344 | 17.2948 | 12 |
| -5 | 11  | -4 | 246.975 | 15.4224 | 6  |
| -5 | 11  | -4 | 234.760 | 15.4993 | 9  |
| 5  | 11  | 4  | 273.729 | 18.0052 | 13 |
| -5 | 11  | -4 | 250.900 | 15.4295 | 6  |
| -6 | -11 | -4 | 20.4682 | 4.62276 | 1  |
| 6  | 11  | 4  | 17.7643 | 4.11695 | 13 |
| -6 | 11  | -4 | 10.0154 | 2.96693 | 12 |
| -6 | 11  | -4 | 10.7840 | 0.98549 | 9  |
| -6 | 11  | -4 | 11.3464 | 0.96329 | 9  |
| -7 | -11 | -4 | 7.57040 | 1.77870 | 8  |
| -7 | -11 | -4 | 7.29352 | 1.94161 | 10 |
| -7 | 11  | -4 | 6.93371 | 2.43466 | 12 |
| 7  | 11  | 4  | 6.59889 | 3.55573 | 13 |
| -8 | -11 | -4 | 10.0325 | 1.88471 | 10 |

|    |     |    |         |         |    |
|----|-----|----|---------|---------|----|
| 8  | 11  | 4  | 11.8340 | 2.97408 | 13 |
| -9 | -12 | 4  | 0.24621 | 1.46666 | 10 |
| -9 | 12  | 4  | 1.08842 | 0.47027 | 9  |
| -9 | 12  | 4  | 1.49676 | 1.48784 | 7  |
| -8 | -12 | 4  | 5.44329 | 2.85613 | 10 |
| -8 | 12  | 4  | 8.12871 | 1.05403 | 9  |
| -8 | 12  | 4  | 9.85634 | 1.93328 | 7  |
| -8 | 12  | 4  | 9.12016 | 0.93296 | 6  |
| -7 | -12 | 4  | 15.9313 | 5.31914 | 1  |
| -7 | 12  | 4  | 22.3430 | 3.46451 | 7  |
| -7 | 12  | 4  | 20.0741 | 1.61676 | 6  |
| -7 | 12  | 4  | 20.5384 | 1.94039 | 9  |
| -6 | -12 | 4  | 134.544 | 10.8693 | 10 |
| -6 | -12 | 4  | 152.514 | 14.2848 | 1  |
| -6 | 12  | 4  | 125.053 | 8.70199 | 9  |
| -6 | 12  | 4  | 137.257 | 9.55604 | 7  |
| 5  | -12 | -4 | 95.5457 | 10.1672 | 2  |
| -5 | 12  | 4  | 92.8363 | 6.82883 | 7  |
| -5 | 12  | 4  | 88.5359 | 5.79874 | 11 |
| 4  | -12 | -4 | 50.2986 | 7.76704 | 2  |
| -4 | 12  | 4  | 50.0579 | 3.55142 | 4  |
| -4 | 12  | 4  | 49.3798 | 3.59229 | 4  |
| -4 | 12  | 4  | 48.5821 | 4.28805 | 3  |
| 3  | -12 | -4 | 3.66768 | 3.05950 | 2  |
| 2  | -12 | -4 | 78.8712 | 7.97358 | 2  |
| -2 | 12  | 4  | 68.4631 | 5.44517 | 4  |
| 1  | -12 | -4 | 407.201 | 27.0856 | 2  |
| 1  | 12  | -4 | 380.597 | 24.7734 | 4  |
| 0  | -12 | -4 | 63.7450 | 8.10631 | 2  |
| 0  | 12  | -4 | 74.4991 | 5.18330 | 4  |
| -1 | -12 | -4 | 2.30861 | 3.13209 | 2  |
| -2 | -12 | -4 | 197.223 | 15.4715 | 1  |
| -2 | -12 | -4 | 191.356 | 15.2456 | 2  |
| -2 | 12  | -4 | 180.896 | 11.9785 | 3  |
| -3 | -12 | -4 | 31.1477 | 6.41590 | 1  |
| -3 | -12 | -4 | 24.8239 | 5.38802 | 2  |
| -3 | 12  | -4 | 41.2895 | 2.42868 | 9  |
| -3 | 12  | -4 | 34.8139 | 2.56003 | 3  |
| -3 | 12  | -4 | 37.2562 | 2.26411 | 6  |
| -3 | 12  | -4 | 32.8332 | 2.25844 | 6  |
| -4 | -12 | -4 | 73.4995 | 9.81693 | 1  |
| -4 | -12 | -4 | 73.8692 | 8.99756 | 2  |
| -4 | -12 | -4 | 63.9480 | 6.90047 | 10 |
| -4 | 12  | -4 | 70.3228 | 4.37254 | 6  |
| -4 | 12  | -4 | 82.9825 | 7.22756 | 12 |
| -4 | 12  | -4 | 69.7830 | 4.49387 | 9  |
| -4 | 12  | -4 | 73.2516 | 4.45343 | 9  |
| -4 | 12  | -4 | 70.0210 | 4.38553 | 6  |
| -5 | -12 | -4 | 3.35170 | 3.90727 | 1  |
| -5 | -12 | -4 | 5.44081 | 3.13175 | 10 |

|    |     |    |         |         |    |
|----|-----|----|---------|---------|----|
| 5  | 12  | 4  | 9.41867 | 4.41354 | 13 |
| -5 | 12  | -4 | 13.4095 | 3.18499 | 12 |
| -5 | 12  | -4 | 11.4355 | 0.88660 | 9  |
| -6 | -12 | -4 | 2.36965 | 3.16329 | 10 |
| -6 | -12 | -4 | 1.28578 | 2.68888 | 10 |
| -6 | -12 | -4 | 4.66201 | 4.11621 | 1  |
| 6  | 12  | 4  | 8.97848 | 4.55782 | 13 |
| -7 | -12 | -4 | 21.4842 | 3.76829 | 10 |
| -7 | -12 | -4 | 22.3244 | 3.61442 | 8  |
| -7 | 12  | -4 | 21.9103 | 3.26749 | 12 |
| 7  | 12  | 4  | 33.8709 | 5.56270 | 13 |
| -8 | -12 | -4 | 8.80182 | 1.79455 | 10 |
| 8  | 12  | 4  | 10.2772 | 2.45671 | 13 |
| -9 | -13 | 4  | 0.98666 | 2.00786 | 10 |
| -8 | -13 | 4  | -0.3034 | 2.49554 | 10 |
| -8 | 13  | 4  | 0.37761 | 0.49302 | 6  |
| -8 | 13  | 4  | 0.01533 | 1.72029 | 7  |
| -8 | 13  | 4  | -0.0145 | 0.57286 | 9  |
| -7 | -13 | 4  | 11.8581 | 3.50385 | 10 |
| -7 | -13 | 4  | 11.0515 | 4.93508 | 1  |
| -7 | 13  | 4  | 21.4691 | 1.96094 | 9  |
| -7 | 13  | 4  | 20.1029 | 2.91185 | 7  |
| -7 | 13  | 4  | 18.8107 | 1.48753 | 6  |
| -6 | -13 | 4  | 63.5768 | 9.47427 | 1  |
| -6 | -13 | 4  | 53.5293 | 6.25807 | 10 |
| -6 | 13  | 4  | 49.5737 | 3.50507 | 6  |
| -6 | 13  | 4  | 53.2808 | 3.86742 | 9  |
| -6 | 13  | 4  | 53.0923 | 4.93622 | 7  |
| 5  | -13 | -4 | 38.3739 | 7.00612 | 2  |
| -5 | -13 | 4  | 35.7708 | 7.73019 | 1  |
| -5 | 13  | 4  | 34.6710 | 3.74490 | 7  |
| -5 | 13  | 4  | 34.9320 | 3.06857 | 9  |
| 5  | 13  | -4 | 41.0425 | 6.17898 | 10 |
| 4  | -13 | -4 | 10.5228 | 3.95898 | 2  |
| -4 | 13  | 4  | 8.61655 | 1.81766 | 3  |
| 3  | -13 | -4 | 44.0724 | 7.29894 | 2  |
| -3 | 13  | 4  | 41.3847 | 3.60169 | 4  |
| 2  | -13 | -4 | 110.840 | 10.4957 | 2  |
| -2 | 13  | 4  | 113.554 | 8.00622 | 4  |
| 1  | 13  | -4 | 8.61470 | 1.89691 | 4  |
| 0  | -13 | -4 | 169.463 | 13.5144 | 2  |
| 0  | 13  | -4 | 157.233 | 10.5995 | 4  |
| -1 | -13 | -4 | 27.1927 | 5.23729 | 2  |
| -2 | 13  | -4 | 37.0453 | 2.41416 | 6  |
| -3 | -13 | -4 | 8.47421 | 3.78558 | 2  |
| -3 | -13 | -4 | 10.0017 | 4.30609 | 1  |
| -3 | 13  | -4 | 7.47971 | 0.87736 | 9  |
| -3 | 13  | -4 | 6.36620 | 0.67344 | 6  |
| -3 | 13  | -4 | 7.04760 | 0.74865 | 6  |
| -3 | 13  | -4 | 7.97488 | 0.93700 | 3  |

|    |     |    |         |         |    |
|----|-----|----|---------|---------|----|
| -3 | 13  | -4 | 6.38671 | 0.81510 | 9  |
| -4 | -13 | -4 | 3.98008 | 3.84506 | 1  |
| -4 | -13 | -4 | -2.7049 | 2.72204 | 10 |
| -4 | 13  | -4 | 2.69560 | 0.32526 | 6  |
| -4 | 13  | -4 | 2.98943 | 0.53988 | 9  |
| -5 | -13 | -4 | 6.68809 | 3.17952 | 10 |
| -5 | -13 | -4 | 10.0639 | 5.14501 | 1  |
| 5  | 13  | 4  | 9.62441 | 4.05108 | 13 |
| -5 | 13  | -4 | 0.35986 | 2.55172 | 12 |
| -6 | -13 | -4 | 6.57390 | 2.86529 | 10 |
| -6 | -13 | -4 | 10.7223 | 3.51417 | 10 |
| -6 | 13  | -4 | 11.9158 | 2.98378 | 12 |
| 6  | 13  | 4  | 9.33601 | 4.18583 | 13 |
| -7 | -13 | -4 | 11.5960 | 2.41374 | 8  |
| -7 | -13 | -4 | 13.5433 | 2.76939 | 10 |
| 7  | 13  | 4  | 16.5027 | 3.47191 | 13 |
| -7 | 13  | -4 | 10.2622 | 2.61944 | 12 |
| -9 | -14 | 4  | 6.02894 | 2.20268 | 10 |
| -8 | -14 | 4  | 4.41481 | 2.09181 | 10 |
| -8 | 14  | 4  | 1.86822 | 0.44894 | 6  |
| -8 | 14  | 4  | 2.38786 | 1.34172 | 7  |
| -8 | 14  | 4  | 1.60273 | 0.66421 | 9  |
| -7 | -14 | 4  | 10.4302 | 3.38653 | 10 |
| -7 | 14  | 4  | 8.96127 | 0.94689 | 6  |
| -7 | 14  | 4  | 11.0185 | 1.34147 | 9  |
| -7 | 14  | 4  | 11.7764 | 2.41629 | 7  |
| -6 | -14 | 4  | 87.1367 | 11.8526 | 1  |
| -6 | 14  | 4  | 106.854 | 7.03263 | 9  |
| -6 | 14  | 4  | 112.010 | 7.93562 | 7  |
| -6 | 14  | 4  | 108.487 | 6.66665 | 6  |
| -5 | -14 | 4  | 333.085 | 26.9666 | 1  |
| 5  | 14  | -4 | 282.029 | 21.2868 | 10 |
| -5 | 14  | 4  | 310.994 | 19.2294 | 9  |
| -5 | 14  | 4  | 313.918 | 19.8944 | 7  |
| 4  | -14 | -4 | 2.65174 | 3.65218 | 2  |
| -4 | 14  | 4  | 4.02594 | 1.05328 | 11 |
| 3  | -14 | -4 | 7.44086 | 3.73949 | 2  |
| -3 | 14  | 4  | 7.85948 | 1.58416 | 4  |
| 2  | -14 | -4 | 16.7767 | 4.60112 | 2  |
| -2 | 14  | 4  | 21.5093 | 2.81589 | 4  |
| 1  | -14 | -4 | 128.508 | 11.5149 | 2  |
| 1  | 14  | -4 | 119.408 | 8.74826 | 4  |
| 0  | -14 | -4 | 28.2670 | 5.55938 | 2  |
| 0  | 14  | -4 | 41.6392 | 3.24146 | 4  |
| -1 | -14 | -4 | 64.3749 | 7.94225 | 2  |
| -1 | 14  | -4 | 74.0424 | 4.52601 | 6  |
| -2 | 14  | -4 | 15.9289 | 1.20968 | 6  |
| -2 | 14  | -4 | 14.9804 | 1.58021 | 9  |
| -3 | -14 | -4 | 5.92763 | 3.62186 | 2  |
| -3 | -14 | -4 | 6.40397 | 4.93528 | 1  |

|    |     |    |         |         |    |
|----|-----|----|---------|---------|----|
| -3 | 14  | -4 | 6.46332 | 0.65201 | 6  |
| -3 | 14  | -4 | 6.85611 | 0.94777 | 9  |
| -3 | 14  | -4 | 7.31327 | 0.75505 | 6  |
| 3  | 14  | 4  | 2.04417 | 3.68427 | 10 |
| -4 | -14 | -4 | 26.5467 | 4.56786 | 10 |
| -4 | -14 | -4 | 21.4029 | 5.92999 | 1  |
| -4 | 14  | -4 | 23.4512 | 3.74779 | 12 |
| -4 | 14  | -4 | 27.5191 | 1.82703 | 9  |
| -4 | 14  | -4 | 25.3518 | 3.64902 | 14 |
| -4 | 14  | -4 | 27.3816 | 1.83775 | 9  |
| -5 | -14 | -4 | 8.92364 | 5.19363 | 1  |
| -5 | -14 | -4 | 7.44012 | 3.36393 | 10 |
| -5 | 14  | -4 | 13.0494 | 3.15506 | 12 |
| -6 | -14 | -4 | 74.2014 | 7.31514 | 10 |
| -6 | -14 | -4 | 76.3753 | 7.06403 | 10 |
| -6 | 14  | -4 | 84.1130 | 7.14892 | 12 |
| 6  | 14  | 4  | 62.2658 | 8.81440 | 13 |
| -7 | -14 | -4 | 7.03909 | 2.37474 | 10 |
| -7 | 14  | -4 | 7.64753 | 2.39139 | 12 |
| -8 | -15 | 4  | 32.8259 | 4.43355 | 10 |
| -8 | 15  | 4  | 21.8346 | 1.46266 | 6  |
| -8 | 15  | 4  | 21.7569 | 1.49229 | 6  |
| -8 | 15  | 4  | 19.9662 | 2.53426 | 7  |
| -8 | 15  | 4  | 21.5993 | 1.67903 | 9  |
| -7 | -15 | 4  | 4.78941 | 3.04186 | 10 |
| -7 | 15  | 4  | 4.25898 | 0.66141 | 6  |
| -7 | 15  | 4  | 3.38846 | 0.90812 | 9  |
| -7 | 15  | 4  | 4.52900 | 1.99852 | 7  |
| -6 | -15 | 4  | 63.0576 | 10.0768 | 1  |
| 6  | 15  | -4 | 61.5712 | 7.91049 | 10 |
| -6 | 15  | 4  | 77.9856 | 5.08762 | 9  |
| -6 | 15  | 4  | 71.4503 | 5.93954 | 7  |
| -6 | 15  | 4  | 76.6521 | 4.70059 | 6  |
| -5 | -15 | 4  | 1.23603 | 2.46282 | 13 |
| -5 | 15  | 4  | 1.98391 | 1.18332 | 9  |
| -5 | 15  | 4  | 4.56231 | 1.87175 | 7  |
| 5  | 15  | -4 | 1.05847 | 3.27863 | 10 |
| -4 | -15 | 4  | 24.5549 | 4.34148 | 13 |
| 4  | -15 | -4 | 15.4453 | 4.97868 | 2  |
| -4 | 15  | 4  | 30.7580 | 2.19641 | 11 |
| -4 | 15  | 4  | 24.9738 | 2.20062 | 11 |
| 4  | 15  | -4 | 19.1722 | 4.27420 | 10 |
| 3  | -15 | -4 | 9.13798 | 4.06660 | 2  |
| 2  | -15 | -4 | 1.63359 | 3.31490 | 2  |
| -2 | 15  | 4  | 2.95908 | 1.51704 | 4  |
| 1  | -15 | -4 | 46.9621 | 8.00199 | 2  |
| 1  | 15  | -4 | 45.5391 | 4.13918 | 4  |
| 0  | -15 | -4 | 57.0361 | 7.46399 | 2  |
| 0  | 15  | -4 | 47.1536 | 3.86844 | 4  |
| -1 | -15 | -4 | 14.7373 | 4.87105 | 2  |

|    |     |    |         |         |    |
|----|-----|----|---------|---------|----|
| -1 | 15  | -4 | 12.5481 | 1.20303 | 6  |
| -2 | -15 | -4 | 77.7945 | 9.23052 | 2  |
| -2 | 15  | -4 | 86.1223 | 5.53100 | 9  |
| -2 | 15  | -4 | 86.3189 | 5.31306 | 6  |
| -3 | -15 | -4 | 12.8605 | 4.80076 | 2  |
| -3 | -15 | -4 | 17.8219 | 5.39437 | 1  |
| 3  | 15  | 4  | 12.2691 | 4.32321 | 10 |
| -3 | 15  | -4 | 12.1845 | 3.05402 | 14 |
| -3 | 15  | -4 | 12.5130 | 3.14688 | 12 |
| -3 | 15  | -4 | 13.6769 | 1.12662 | 6  |
| -3 | 15  | -4 | 15.1430 | 1.07336 | 6  |
| -4 | -15 | -4 | 81.7427 | 7.75199 | 10 |
| -4 | -15 | -4 | 83.0148 | 10.3991 | 1  |
| -4 | 15  | -4 | 80.8972 | 7.01778 | 12 |
| -4 | 15  | -4 | 77.4588 | 6.97552 | 14 |
| -4 | 15  | -4 | 69.5266 | 4.70314 | 9  |
| -4 | 15  | -4 | 73.9194 | 4.71422 | 9  |
| -5 | -15 | -4 | 189.559 | 16.9432 | 1  |
| -5 | -15 | -4 | 196.804 | 14.4353 | 10 |
| -5 | -15 | -4 | 195.144 | 14.5670 | 10 |
| -5 | 15  | -4 | 204.295 | 13.9910 | 12 |
| -6 | -15 | -4 | 25.9944 | 3.85671 | 10 |
| -6 | -15 | -4 | 27.4493 | 3.74556 | 10 |
| -6 | 15  | -4 | 21.7711 | 3.69846 | 12 |
| -7 | -15 | -4 | 12.7911 | 2.30020 | 10 |
| -8 | -16 | 4  | 32.6409 | 3.93972 | 10 |
| -8 | 16  | 4  | 38.0557 | 2.33019 | 9  |
| -8 | 16  | 4  | 33.6482 | 2.29465 | 9  |
| -7 | -16 | 4  | 5.06349 | 3.21813 | 10 |
| -7 | 16  | 4  | 8.34798 | 2.15619 | 7  |
| -7 | 16  | 4  | 7.63500 | 0.94531 | 9  |
| -7 | 16  | 4  | 6.67080 | 0.74561 | 6  |
| -6 | -16 | 4  | 13.2972 | 5.60726 | 1  |
| 6  | 16  | -4 | 13.2553 | 4.48602 | 10 |
| -6 | 16  | 4  | 23.4915 | 1.70786 | 6  |
| -6 | 16  | 4  | 22.0807 | 3.35340 | 7  |
| -5 | -16 | 4  | 140.802 | 11.0911 | 13 |
| 5  | 16  | -4 | 145.309 | 12.2552 | 10 |
| -5 | 16  | 4  | 160.125 | 9.85645 | 9  |
| -5 | 16  | 4  | 156.150 | 10.4673 | 7  |
| -4 | 16  | 4  | 20.3313 | 1.72010 | 11 |
| -4 | 16  | 4  | 19.3503 | 1.71049 | 11 |
| 3  | -16 | -4 | 5.77283 | 4.01478 | 2  |
| -3 | 16  | 4  | 7.76687 | 1.63070 | 11 |
| 2  | -16 | -4 | 340.095 | 25.0847 | 2  |
| 1  | -16 | -4 | 59.7438 | 8.39859 | 2  |
| 0  | -16 | -4 | 9.45986 | 4.12307 | 2  |
| -1 | 16  | -4 | 43.9621 | 3.50376 | 9  |
| -2 | -16 | -4 | -0.2220 | 2.94137 | 2  |
| -2 | 16  | -4 | 9.98471 | 3.74693 | 12 |

|    |     |    |         |         |    |
|----|-----|----|---------|---------|----|
| 2  | 16  | 4  | 2.55256 | 3.37648 | 10 |
| -3 | -16 | -4 | 34.3734 | 7.95566 | 1  |
| -3 | 16  | -4 | 36.9511 | 5.78465 | 14 |
| -3 | 16  | -4 | 38.2352 | 2.38016 | 6  |
| -3 | 16  | -4 | 34.3502 | 2.66206 | 9  |
| -3 | 16  | -4 | 36.4385 | 4.77702 | 12 |
| 3  | 16  | 4  | 34.6217 | 6.28970 | 10 |
| -4 | -16 | -4 | 6.89528 | 4.87367 | 1  |
| -4 | 16  | -4 | 6.12816 | 0.78667 | 9  |
| -4 | 16  | -4 | 5.11318 | 0.57621 | 9  |
| -4 | 16  | -4 | 3.86056 | 2.73561 | 14 |
| -4 | 16  | -4 | 5.70374 | 3.36716 | 12 |
| -5 | -16 | -4 | 231.185 | 16.5668 | 10 |
| -5 | -16 | -4 | 236.396 | 16.7519 | 10 |
| -5 | 16  | -4 | 234.512 | 16.1002 | 12 |
| -6 | -16 | -4 | 8.71286 | 2.95859 | 10 |
| -6 | 16  | -4 | 11.3899 | 2.43841 | 12 |
| -7 | -16 | -4 | 7.80924 | 2.27243 | 10 |
| -8 | -17 | 4  | 38.1561 | 3.95867 | 10 |
| -7 | -17 | 4  | 0.03605 | 2.65557 | 10 |
| -7 | 17  | 4  | -0.0867 | 0.60582 | 9  |
| -7 | 17  | 4  | 0.69752 | 0.40250 | 6  |
| -7 | 17  | 4  | 0.92109 | 0.38018 | 6  |
| 7  | 17  | -4 | -0.1653 | 3.56200 | 10 |
| -6 | 17  | 4  | 4.24563 | 1.07761 | 9  |
| 6  | 17  | -4 | 5.78394 | 3.89337 | 10 |
| -6 | 17  | 4  | 2.58613 | 1.88375 | 7  |
| -6 | 17  | 4  | 3.07912 | 0.67972 | 6  |
| -5 | -17 | 4  | 63.8224 | 6.26741 | 13 |
| 5  | 17  | -4 | 62.3844 | 7.69590 | 10 |
| -5 | 17  | 4  | 73.0105 | 4.86063 | 9  |
| -4 | -17 | 4  | 118.562 | 9.19097 | 13 |
| 4  | 17  | -4 | 117.156 | 10.1888 | 10 |
| -3 | -17 | 4  | 152.282 | 10.8449 | 13 |
| 3  | -17 | -4 | 160.336 | 17.0285 | 2  |
| 3  | 17  | -4 | 138.273 | 11.5112 | 10 |
| -3 | 17  | 4  | 123.503 | 9.09337 | 11 |
| 2  | -17 | -4 | 187.659 | 15.8592 | 2  |
| 2  | 17  | -4 | 194.382 | 13.3042 | 10 |
| -2 | 17  | 4  | 159.152 | 12.2349 | 10 |
| 1  | -17 | -4 | 57.2611 | 8.25690 | 2  |
| -1 | 17  | 4  | 51.1259 | 6.08306 | 10 |
| 0  | -17 | -4 | 38.0376 | 7.40248 | 2  |
| 0  | 17  | -4 | 55.8109 | 4.60290 | 11 |
| 0  | 17  | 4  | 57.7533 | 6.87772 | 10 |
| -1 | -17 | -4 | 1.66659 | 3.09616 | 2  |
| -1 | 17  | -4 | 8.15255 | 1.54550 | 9  |
| 1  | 17  | 4  | 4.91447 | 3.11414 | 10 |
| -2 | -17 | -4 | 1.98568 | 2.26011 | 13 |
| -2 | 17  | -4 | 4.95410 | 2.74609 | 14 |



|    |     |    |         |         |    |
|----|-----|----|---------|---------|----|
| -2 | 17  | -4 | 4.10725 | 1.11177 | 9  |
| 2  | 17  | 4  | 2.18770 | 3.30115 | 10 |
| -2 | 17  | -4 | 4.49454 | 0.62388 | 6  |
| -3 | 17  | -4 | 7.24546 | 0.77176 | 6  |
| -3 | 17  | -4 | 11.9869 | 3.05118 | 14 |
| -3 | 17  | -4 | 7.28497 | 1.08920 | 9  |
| 3  | 17  | 4  | 9.66593 | 4.00306 | 10 |
| -3 | 17  | -4 | 11.1408 | 2.94732 | 12 |
| -4 | -17 | -4 | 148.146 | 14.5420 | 1  |
| 4  | 17  | 4  | 159.290 | 12.4640 | 10 |
| -4 | 17  | -4 | 125.624 | 10.5429 | 12 |
| -5 | -17 | -4 | 26.3547 | 4.40919 | 10 |
| -5 | -17 | -4 | 26.0180 | 4.67557 | 10 |
| -5 | 17  | -4 | 25.7599 | 4.07603 | 12 |
| -6 | -17 | -4 | 10.3772 | 2.90370 | 10 |
| -6 | 17  | -4 | 4.81099 | 2.72267 | 12 |
| -7 | -17 | -4 | 1.49028 | 1.32431 | 10 |
| -7 | 18  | 4  | 23.6776 | 1.75788 | 9  |
| -7 | 18  | 4  | 22.4274 | 1.49956 | 6  |
| -7 | 18  | 4  | 21.9245 | 1.48976 | 6  |
| 7  | 18  | -4 | 17.6552 | 4.43112 | 10 |
| -6 | 18  | 4  | 20.8839 | 1.58804 | 6  |
| 6  | 18  | -4 | 18.7393 | 4.41864 | 10 |
| -6 | 18  | 4  | 22.3339 | 1.97235 | 9  |
| -5 | -18 | 4  | 9.40641 | 3.38710 | 13 |
| 5  | 18  | -4 | 12.2383 | 4.16441 | 10 |
| -4 | -18 | 4  | 21.0444 | 3.83145 | 13 |
| 4  | 18  | -4 | 19.3878 | 4.24080 | 10 |
| -3 | -18 | 4  | 3.71063 | 2.31333 | 13 |
| -3 | 18  | 4  | 4.63660 | 1.17059 | 11 |
| 3  | 18  | -4 | 7.39163 | 3.74317 | 10 |
| -2 | -18 | 4  | 75.5407 | 6.86068 | 13 |
| 2  | 18  | -4 | 70.4396 | 7.12302 | 10 |
| -2 | 18  | 4  | 86.2337 | 5.94254 | 11 |
| 1  | -18 | -4 | 18.3472 | 3.49651 | 13 |
| 1  | -18 | -4 | 18.1193 | 5.33916 | 2  |
| -1 | -18 | 4  | 16.5468 | 4.60923 | 13 |
| -1 | 18  | 4  | 17.2996 | 3.32469 | 10 |
| 1  | 18  | -4 | 24.0001 | 4.20711 | 10 |
| 0  | -18 | -4 | 1.56462 | 2.87719 | 13 |
| 0  | -18 | -4 | 0.55306 | 3.14075 | 2  |
| 0  | 18  | -4 | 3.07495 | 1.60751 | 11 |
| 0  | 18  | 4  | -3.0091 | 3.20660 | 10 |
| -1 | -18 | -4 | 83.1637 | 6.96478 | 13 |
| -1 | 18  | -4 | 76.3145 | 7.05062 | 14 |
| 1  | 18  | 4  | 74.4927 | 7.94516 | 10 |
| -1 | 18  | -4 | 77.7167 | 5.64009 | 9  |
| -2 | -18 | -4 | -1.4692 | 2.12972 | 13 |
| -2 | 18  | -4 | 1.15939 | 1.09102 | 9  |
| -2 | 18  | -4 | 1.55422 | 3.18926 | 14 |

|    |     |    |         |         |    |
|----|-----|----|---------|---------|----|
| -2 | 18  | -4 | 0.91748 | 0.41558 | 6  |
| -2 | 18  | -4 | 1.13122 | 2.44419 | 12 |
| 2  | 18  | 4  | -0.0692 | 3.35577 | 10 |
| -3 | 18  | -4 | 10.3155 | 0.96139 | 6  |
| -3 | 18  | -4 | 10.9637 | 1.38024 | 9  |
| -3 | 18  | -4 | 10.1301 | 3.01200 | 12 |
| -3 | 18  | -4 | 10.1414 | 0.87222 | 6  |
| 3  | 18  | 4  | 15.1485 | 4.33471 | 10 |
| 4  | 18  | 4  | 79.4759 | 8.76204 | 10 |
| -4 | 18  | -4 | 67.8863 | 6.98709 | 12 |
| -5 | -18 | -4 | 3.82474 | 2.94065 | 10 |
| -5 | 18  | -4 | 2.54215 | 2.85244 | 12 |
| -6 | -18 | -4 | 8.41509 | 2.69846 | 10 |
| -7 | 19  | 4  | 1.37199 | 0.41968 | 9  |
| 7  | 19  | -4 | 0.20055 | 3.10920 | 10 |
| -7 | 19  | 4  | 1.58940 | 0.46060 | 9  |
| 6  | 19  | -4 | 49.3468 | 5.67546 | 10 |
| -6 | 19  | 4  | 39.6597 | 3.05181 | 9  |
| -6 | 19  | 4  | 38.8297 | 2.71388 | 6  |
| -5 | -19 | 4  | 40.2860 | 5.65075 | 13 |
| -5 | 19  | 4  | 44.2726 | 2.99152 | 6  |
| -5 | 19  | 4  | 52.8136 | 3.66140 | 9  |
| 5  | 19  | -4 | 34.4582 | 6.19674 | 10 |
| -4 | -19 | 4  | 43.6546 | 6.00680 | 13 |
| 4  | 19  | -4 | 43.9923 | 6.19524 | 10 |
| -3 | 19  | 4  | 25.5034 | 2.25094 | 11 |
| -3 | 19  | 4  | 24.6989 | 2.21915 | 11 |
| -2 | -19 | 4  | 30.4457 | 5.24988 | 13 |
| 2  | 19  | -4 | 29.5514 | 4.60934 | 10 |
| -2 | 19  | 4  | 36.9393 | 3.75394 | 11 |
| -1 | -19 | 4  | 42.7420 | 5.42024 | 13 |
| 1  | -19 | -4 | 38.1143 | 4.69155 | 13 |
| -1 | 19  | 4  | 37.8480 | 4.85806 | 10 |
| 1  | 19  | -4 | 27.8225 | 5.44111 | 10 |
| 0  | -19 | -4 | 81.1934 | 6.86967 | 13 |
| 0  | 19  | 4  | 82.2684 | 7.50301 | 10 |
| 0  | 19  | -4 | 72.0774 | 5.73382 | 11 |
| -1 | -19 | -4 | 167.909 | 12.1838 | 13 |
| 1  | 19  | 4  | 171.485 | 13.1364 | 10 |
| -2 | -19 | -4 | 160.420 | 11.2883 | 13 |
| -2 | 19  | -4 | 148.207 | 9.87710 | 9  |
| 2  | 19  | 4  | 149.418 | 12.4524 | 10 |
| -2 | 19  | -4 | 161.559 | 9.61035 | 6  |
| 3  | 19  | 4  | 121.036 | 10.4717 | 10 |
| -3 | 19  | -4 | 126.138 | 10.0607 | 12 |
| -3 | 19  | -4 | 128.771 | 7.99675 | 9  |
| -3 | 19  | -4 | 127.434 | 7.72931 | 6  |
| -3 | 19  | -4 | 123.222 | 7.75570 | 6  |
| 4  | 19  | 4  | 4.74603 | 4.11137 | 10 |
| -4 | 19  | -4 | 8.11382 | 3.16522 | 12 |

|    |     |    |         |         |    |
|----|-----|----|---------|---------|----|
| -5 | -19 | -4 | 28.6175 | 4.61665 | 10 |
| 5  | 19  | 4  | 26.1839 | 4.90732 | 10 |
| -6 | -19 | -4 | 0.70786 | 1.51273 | 10 |
| 7  | 20  | -4 | 3.42145 | 2.86238 | 10 |
| -6 | 20  | 4  | 7.75862 | 0.78741 | 6  |
| -6 | 20  | 4  | 7.82471 | 1.00752 | 9  |
| 6  | 20  | -4 | 5.97957 | 3.68849 | 10 |
| -5 | -20 | 4  | 23.1816 | 4.03891 | 13 |
| -5 | 20  | 4  | 30.4661 | 2.71473 | 9  |
| -5 | 20  | 4  | 29.2693 | 2.11120 | 6  |
| -4 | -20 | 4  | 28.0819 | 4.87260 | 13 |
| 4  | 20  | -4 | 21.1415 | 4.35306 | 10 |
| -3 | -20 | 4  | 18.4545 | 3.34500 | 13 |
| -3 | 20  | 4  | 13.6053 | 1.41841 | 11 |
| -3 | 20  | 4  | 13.3796 | 1.38392 | 11 |
| 3  | 20  | -4 | 15.3648 | 3.53936 | 10 |
| -2 | -20 | 4  | 229.703 | 15.3105 | 13 |
| 2  | -20 | -4 | 201.082 | 14.9815 | 13 |
| 2  | 20  | -4 | 251.980 | 15.4640 | 10 |
| -2 | 20  | 4  | 194.684 | 13.8987 | 11 |
| -1 | -20 | 4  | 16.0961 | 2.92767 | 13 |
| 1  | -20 | -4 | 9.39096 | 2.59441 | 13 |
| -1 | 20  | 4  | 8.56005 | 2.83714 | 10 |
| 0  | -20 | -4 | 42.0157 | 5.50409 | 13 |
| 0  | 20  | 4  | 46.4554 | 6.29020 | 10 |
| 0  | 20  | -4 | 59.4917 | 4.01523 | 11 |
| 0  | 20  | -4 | 59.3970 | 4.14594 | 11 |
| -1 | -20 | -4 | 28.9237 | 5.26381 | 13 |
| 1  | 20  | 4  | 34.8264 | 6.18532 | 10 |
| -2 | -20 | -4 | 3.15265 | 3.01792 | 13 |
| 2  | 20  | 4  | 0.84326 | 3.15346 | 10 |
| -2 | 20  | -4 | 1.52138 | 0.98796 | 9  |
| -2 | 20  | -4 | 0.18495 | 0.51644 | 6  |
| -3 | 20  | -4 | 7.07114 | 0.73283 | 6  |
| 3  | 20  | 4  | 7.24476 | 3.81850 | 10 |
| -3 | 20  | -4 | 7.65442 | 1.11740 | 9  |
| -3 | 20  | -4 | 8.71799 | 0.78064 | 6  |
| 4  | 20  | 4  | 29.2778 | 5.74081 | 10 |
| 5  | 20  | 4  | 5.95016 | 2.65415 | 10 |
| -6 | 21  | 4  | 11.8812 | 0.93152 | 6  |
| -6 | 21  | 4  | 10.8694 | 1.24725 | 9  |
| 6  | 21  | -4 | 11.9254 | 3.60262 | 10 |
| -5 | -21 | 4  | -0.2603 | 2.38537 | 13 |
| -5 | 21  | 4  | 1.45425 | 0.85460 | 9  |
| -5 | 21  | 4  | 1.70576 | 0.48927 | 6  |
| 5  | 21  | -4 | -0.1735 | 3.23203 | 10 |
| -4 | -21 | 4  | 45.6450 | 5.38796 | 13 |
| 4  | 21  | -4 | 35.3867 | 5.80450 | 10 |
| -3 | -21 | 4  | 2.55140 | 3.26821 | 13 |
| 3  | 21  | -4 | -0.4970 | 2.92034 | 10 |

|    |     |    |         |         |    |
|----|-----|----|---------|---------|----|
| 2  | -21 | -4 | 11.2550 | 2.71285 | 13 |
| 2  | 21  | -4 | 19.7014 | 3.86590 | 10 |
| -2 | 21  | 4  | 11.4198 | 1.77747 | 11 |
| 1  | -21 | -4 | 45.7133 | 5.33959 | 13 |
| -1 | -21 | 4  | 48.9795 | 5.93804 | 13 |
| 1  | 21  | -4 | 50.7400 | 4.90695 | 11 |
| -1 | 21  | 4  | 43.9155 | 4.67266 | 10 |
| 0  | -21 | -4 | 23.3538 | 3.43621 | 13 |
| 0  | 21  | -4 | 16.1566 | 1.79969 | 11 |
| 0  | 21  | 4  | 21.0130 | 4.07166 | 10 |
| 0  | 21  | -4 | 17.1871 | 1.94847 | 11 |
| -1 | -21 | -4 | 20.3734 | 3.48903 | 13 |
| 1  | 21  | 4  | 18.3667 | 4.00572 | 10 |
| -2 | -21 | -4 | 17.9080 | 3.29900 | 13 |
| 2  | 21  | 4  | 13.0593 | 3.97707 | 10 |
| -2 | 21  | -4 | 15.1006 | 1.27531 | 6  |
| -2 | 21  | -4 | 16.0210 | 1.94719 | 9  |
| -3 | 21  | -4 | 26.7444 | 1.68459 | 6  |
| -3 | 21  | -4 | 25.0565 | 2.14689 | 9  |
| 3  | 21  | 4  | 21.2419 | 4.32625 | 10 |
| -3 | 21  | -4 | 24.6527 | 1.70150 | 6  |
| 4  | 21  | 4  | 0.31660 | 2.33412 | 10 |
| 5  | 21  | 4  | 3.37909 | 2.29633 | 10 |
| 6  | 22  | -4 | 29.3088 | 4.34379 | 10 |
| -5 | 22  | 4  | 5.37384 | 0.62539 | 6  |
| -5 | 22  | 4  | 3.12742 | 1.02793 | 9  |
| 5  | 22  | -4 | -0.5444 | 3.04619 | 10 |
| -4 | -22 | 4  | 0.94357 | 2.50939 | 13 |
| -3 | -22 | 4  | 168.066 | 11.5930 | 13 |
| 3  | 22  | -4 | 147.745 | 11.6615 | 10 |
| 2  | -22 | -4 | 13.1110 | 3.15230 | 13 |
| -2 | -22 | 4  | 7.81994 | 2.81699 | 13 |
| -2 | 22  | 4  | 11.7191 | 1.46014 | 11 |
| 2  | 22  | -4 | 9.48967 | 2.52334 | 10 |
| -2 | 22  | 4  | 14.4779 | 2.04337 | 11 |
| -1 | -22 | 4  | 8.97803 | 2.75659 | 13 |
| 1  | -22 | -4 | 9.65893 | 2.87552 | 13 |
| 1  | 22  | -4 | 4.46419 | 2.00697 | 11 |
| -1 | 22  | 4  | 7.53444 | 2.25054 | 11 |
| 0  | -22 | -4 | 20.2661 | 3.50666 | 13 |
| 0  | 22  | 4  | 16.8422 | 3.22054 | 10 |
| -1 | -22 | -4 | 86.4472 | 7.44181 | 13 |
| 1  | 22  | 4  | 76.7996 | 7.57213 | 10 |
| 2  | 22  | 4  | 6.71830 | 3.37903 | 10 |
| -2 | 22  | -4 | 8.78540 | 1.33935 | 9  |
| -2 | 22  | -4 | 9.34300 | 0.90875 | 6  |
| 3  | 22  | 4  | 8.96537 | 2.83894 | 10 |
| -3 | 22  | -4 | 6.40265 | 0.58579 | 6  |
| -3 | 22  | -4 | 5.89580 | 0.84501 | 9  |
| -3 | 22  | -4 | 7.09058 | 0.55543 | 6  |

|    |     |    |         |         |    |
|----|-----|----|---------|---------|----|
| 4  | 22  | 4  | 4.31509 | 2.44214 | 10 |
| 5  | 22  | 4  | -1.2827 | 1.87763 | 10 |
| -5 | 23  | 4  | 5.40535 | 0.82868 | 9  |
| 5  | 23  | -4 | 3.58184 | 2.61340 | 10 |
| -4 | -23 | 4  | 5.56369 | 2.47995 | 13 |
| 4  | 23  | -4 | 4.36443 | 2.69327 | 10 |
| -3 | -23 | 4  | 45.8018 | 5.17554 | 13 |
| 3  | 23  | -4 | 38.5693 | 4.71183 | 10 |
| 2  | -23 | -4 | 13.8950 | 2.73180 | 13 |
| -2 | -23 | 4  | 14.2940 | 2.93615 | 13 |
| 2  | 23  | -4 | 9.93103 | 2.32295 | 11 |
| -1 | -23 | 4  | 15.2607 | 3.08635 | 13 |
| 1  | -23 | -4 | 16.8701 | 3.56618 | 13 |
| 1  | 23  | -4 | 17.4737 | 2.56508 | 11 |
| -1 | 23  | 4  | 18.0913 | 2.54199 | 11 |
| 0  | 23  | 4  | 46.8964 | 5.24256 | 10 |
| -1 | -23 | -4 | 29.4490 | 4.54270 | 13 |
| 1  | 23  | 4  | 26.2801 | 4.36229 | 10 |
| -2 | -23 | -4 | 1.67840 | 2.56195 | 13 |
| -2 | 23  | -4 | 2.67813 | 1.22455 | 9  |
| 2  | 23  | 4  | 0.41056 | 3.09324 | 10 |
| -2 | 23  | -4 | 4.75416 | 0.56835 | 6  |
| 3  | 23  | 4  | 12.4256 | 3.68414 | 10 |
| -3 | 23  | -4 | 17.8636 | 1.36885 | 9  |
| -3 | 23  | -4 | 19.5597 | 1.48853 | 9  |
| 4  | 23  | 4  | 3.20323 | 2.72652 | 10 |
| 5  | 24  | -4 | 5.76825 | 2.09239 | 10 |
| -4 | -24 | 4  | 9.90083 | 2.61252 | 13 |
| 4  | 24  | -4 | 8.36680 | 2.68892 | 10 |
| -4 | 24  | 4  | 12.0024 | 1.37673 | 9  |
| -3 | -24 | 4  | 7.91078 | 2.42180 | 13 |
| 3  | 24  | -4 | 7.47457 | 2.29926 | 10 |
| -2 | -24 | 4  | 29.7055 | 5.18630 | 13 |
| 2  | -24 | -4 | 24.0989 | 3.88849 | 13 |
| 2  | 24  | -4 | 32.0770 | 3.25896 | 11 |
| 1  | -24 | -4 | 18.8910 | 3.65489 | 13 |
| -1 | -24 | 4  | 29.3669 | 4.99887 | 13 |
| 0  | -24 | -4 | 13.2235 | 3.01550 | 13 |
| -1 | -24 | -4 | 25.1867 | 4.35744 | 13 |
| 1  | 24  | 4  | 28.3276 | 3.94128 | 10 |
| -2 | -24 | -4 | 2.13652 | 2.09875 | 13 |
| -2 | 24  | -4 | 0.95640 | 0.81113 | 9  |
| -2 | 24  | -4 | 1.70230 | 0.49913 | 6  |
| 2  | 24  | 4  | 1.71049 | 2.52935 | 10 |
| 3  | 24  | 4  | 18.6450 | 3.41312 | 10 |
| 4  | 24  | 4  | 3.90179 | 3.38513 | 10 |
| -4 | -25 | 4  | 9.16077 | 2.11132 | 13 |
| -3 | -25 | 4  | 3.05411 | 2.00904 | 13 |
| 3  | -25 | -4 | -0.0352 | 1.44161 | 13 |
| 3  | 25  | -4 | 0.97435 | 1.42032 | 11 |

|    |     |    |         |         |    |
|----|-----|----|---------|---------|----|
| -2 | -25 | 4  | 68.3749 | 5.92162 | 13 |
| 2  | -25 | -4 | 70.8102 | 5.53312 | 13 |
| 2  | 25  | -4 | 63.7491 | 4.47426 | 11 |
| 2  | 25  | -4 | 62.5483 | 4.52056 | 11 |
| -1 | -25 | 4  | 9.84442 | 2.39538 | 13 |
| 0  | -25 | -4 | -1.1466 | 2.02011 | 13 |
| 0  | -25 | 4  | 2.07351 | 1.81379 | 13 |
| 0  | 25  | 4  | -1.2630 | 1.11429 | 11 |
| -1 | -25 | -4 | 1.39544 | 1.96645 | 13 |
| 1  | 25  | 4  | 0.39486 | 1.57751 | 10 |
| -1 | 25  | -4 | 0.04968 | 1.23349 | 9  |
| -2 | -25 | -4 | 22.3825 | 3.16267 | 13 |
| -2 | 25  | -4 | 25.8687 | 2.10985 | 9  |
| 2  | 25  | 4  | 23.2928 | 3.45211 | 10 |
| 3  | 25  | 4  | 0.97062 | 1.92844 | 10 |
| 3  | -26 | -4 | 7.19852 | 1.84056 | 13 |
| -3 | -26 | 4  | 8.69656 | 1.89862 | 13 |
| 3  | 26  | -4 | 7.62791 | 0.99079 | 11 |
| 3  | 26  | -4 | 9.36445 | 1.34597 | 11 |
| 2  | -26 | -4 | 4.88079 | 1.69659 | 13 |
| -2 | -26 | 4  | 7.88265 | 2.41917 | 13 |
| -1 | -26 | 4  | 6.27429 | 1.96076 | 13 |
| 1  | -26 | -4 | 5.73312 | 1.84009 | 13 |
| 0  | -26 | -4 | 2.57010 | 1.77031 | 13 |
| 0  | -26 | 4  | 2.22758 | 1.94196 | 13 |
| 0  | 26  | 4  | 2.21636 | 0.79407 | 11 |
| 0  | 26  | 4  | 2.12642 | 0.78166 | 11 |
| -1 | -26 | -4 | 0.77305 | 1.65793 | 13 |
| 1  | 26  | 4  | 0.34095 | 1.10099 | 11 |
| -2 | -26 | -4 | 7.51862 | 1.84537 | 13 |
| 2  | -27 | -4 | 0.12759 | 1.56168 | 13 |
| -2 | -27 | 4  | 4.49552 | 1.66904 | 13 |
| 1  | -27 | -4 | -0.2849 | 1.72538 | 13 |
| -1 | -27 | 4  | -0.1749 | 1.42346 | 13 |
| 0  | -27 | -4 | 0.60524 | 1.50909 | 13 |
| 0  | -27 | 4  | 0.33767 | 1.78117 | 13 |
| 10 | 0   | -5 | 9.73482 | 3.14087 | 13 |
| 9  | 0   | -5 | -0.3085 | 3.18640 | 13 |
| 9  | 0   | -5 | -0.6177 | 3.01025 | 13 |
| -9 | 0   | 5  | 0.32723 | 1.16614 | 11 |
| -8 | 0   | 5  | 24.1165 | 3.44615 | 10 |
| 8  | 0   | -5 | 25.0142 | 4.40773 | 13 |
| -7 | 0   | 5  | 5.77613 | 2.76078 | 10 |
| -6 | 0   | 5  | 10.5210 | 3.35653 | 1  |
| -5 | 0   | 5  | 6.74607 | 1.72036 | 5  |
| -5 | 0   | 5  | 6.71133 | 2.97617 | 1  |
| -4 | 0   | 5  | 211.220 | 15.7772 | 1  |
| -4 | 0   | 5  | 231.153 | 16.0718 | 5  |
| -3 | 0   | 5  | 7.61437 | 3.02942 | 1  |
| -3 | 0   | 5  | 13.9244 | 3.92894 | 5  |

|    |    |    |         |         |    |
|----|----|----|---------|---------|----|
| -2 | 0  | 5  | 245.123 | 17.4763 | 5  |
| 1  | 0  | -5 | 330.429 | 21.3208 | 2  |
| -1 | 0  | 5  | 345.225 | 23.0080 | 5  |
| 0  | 0  | -5 | 803.701 | 48.6494 | 5  |
| 0  | 0  | -5 | 800.554 | 48.0765 | 3  |
| 0  | 0  | -5 | 734.664 | 48.0606 | 4  |
| -1 | 0  | -5 | 1.00250 | 1.36641 | 4  |
| -1 | 0  | -5 | 0.80074 | 0.93940 | 3  |
| -1 | 0  | -5 | 1.13324 | 1.20151 | 5  |
| -1 | 0  | -5 | 1.33398 | 1.44348 | 5  |
| -2 | 0  | -5 | 481.971 | 29.2965 | 4  |
| -2 | 0  | -5 | 454.456 | 29.8094 | 1  |
| -3 | 0  | -5 | -0.5350 | 0.86685 | 3  |
| -3 | 0  | -5 | 0.34612 | 1.32722 | 1  |
| -3 | 0  | -5 | 0.23073 | 1.18375 | 4  |
| -4 | 0  | -5 | 20.3211 | 2.62799 | 4  |
| -5 | 0  | -5 | 2.87440 | 1.39266 | 8  |
| -6 | 0  | -5 | 13.2347 | 2.08845 | 8  |
| -7 | 0  | -5 | 4.84107 | 1.56732 | 8  |
| 10 | -1 | -5 | 26.0042 | 3.71245 | 13 |
| 10 | 1  | -5 | 16.9810 | 3.54155 | 13 |
| 9  | -1 | -5 | 1.36985 | 3.00258 | 13 |
| -9 | -1 | 5  | 1.09004 | 1.16926 | 11 |
| 9  | -1 | -5 | 0.84503 | 3.00013 | 13 |
| -9 | 1  | 5  | 1.12852 | 1.01783 | 11 |
| 9  | 1  | -5 | 1.91522 | 3.16807 | 13 |
| -8 | -1 | 5  | 6.09023 | 2.57013 | 10 |
| 8  | -1 | -5 | 8.05964 | 3.32114 | 13 |
| -8 | 1  | 5  | 9.59849 | 2.38513 | 10 |
| 8  | 1  | -5 | 7.89268 | 4.22115 | 13 |
| -7 | -1 | 5  | 47.0048 | 5.48353 | 10 |
| 7  | -1 | -5 | 47.9339 | 6.92963 | 13 |
| -7 | -1 | 5  | 52.4310 | 5.66689 | 1  |
| -7 | 1  | 5  | 37.8121 | 4.64324 | 10 |
| 7  | 1  | -5 | 47.1934 | 7.03801 | 13 |
| -6 | -1 | 5  | 2.23823 | 2.92560 | 1  |
| -6 | 1  | 5  | 7.43405 | 2.75383 | 1  |
| -5 | -1 | 5  | 119.768 | 8.92715 | 5  |
| -5 | -1 | 5  | 115.952 | 9.65342 | 1  |
| -5 | 1  | 5  | 89.6062 | 8.84398 | 1  |
| -4 | 1  | 5  | 99.9345 | 8.92342 | 1  |
| -4 | 1  | 5  | 104.042 | 8.44745 | 5  |
| -3 | -1 | 5  | 12.0847 | 3.19397 | 1  |
| -3 | -1 | 5  | 16.5808 | 3.83864 | 5  |
| -3 | 1  | 5  | 15.3160 | 3.52947 | 1  |
| 2  | -1 | -5 | 28.7836 | 3.46634 | 2  |
| -2 | -1 | 5  | 31.9649 | 4.83630 | 5  |
| -2 | 1  | 5  | 27.9798 | 4.47098 | 5  |
| 1  | -1 | -5 | 1040.84 | 61.5904 | 2  |
| -1 | 1  | 5  | 1096.72 | 63.1797 | 5  |

|     |    |    |         |         |    |
|-----|----|----|---------|---------|----|
| 1   | 1  | -5 | 866.229 | 61.3060 | 4  |
| 0   | -1 | -5 | 523.681 | 34.0636 | 4  |
| 0   | -1 | -5 | 558.936 | 34.6998 | 5  |
| 0   | -1 | -5 | 530.534 | 34.1487 | 2  |
| 0   | 1  | -5 | 548.923 | 33.9271 | 3  |
| 0   | 1  | -5 | 556.504 | 34.0232 | 4  |
| 0   | 1  | -5 | 570.432 | 34.4042 | 5  |
| -1  | -1 | -5 | 145.600 | 9.49120 | 2  |
| -1  | -1 | -5 | 150.037 | 9.22847 | 4  |
| -1  | -1 | -5 | 111.837 | 9.40410 | 3  |
| -1  | -1 | -5 | 138.490 | 9.42936 | 5  |
| -1  | 1  | -5 | 128.386 | 9.02713 | 4  |
| -1  | 1  | -5 | 132.563 | 8.52792 | 5  |
| -1  | 1  | -5 | 129.069 | 8.92555 | 3  |
| -1  | 1  | -5 | 131.426 | 8.60319 | 5  |
| -2  | -1 | -5 | 28.6502 | 3.27684 | 4  |
| -2  | -1 | -5 | 30.4727 | 4.11372 | 1  |
| -2  | -1 | -5 | 31.3531 | 3.97085 | 2  |
| -2  | 1  | -5 | 43.6814 | 3.77777 | 1  |
| -3  | -1 | -5 | 18.7043 | 3.09742 | 1  |
| -3  | -1 | -5 | 20.6925 | 2.71269 | 4  |
| -3  | 1  | -5 | 14.2983 | 2.20285 | 4  |
| -3  | 1  | -5 | 13.4388 | 2.14214 | 3  |
| -4  | 1  | -5 | 27.8260 | 2.81007 | 4  |
| -4  | 1  | -5 | 21.9023 | 3.36309 | 3  |
| -5  | -1 | -5 | 43.5889 | 3.76010 | 8  |
| -5  | 1  | -5 | 39.4327 | 3.52542 | 8  |
| -6  | -1 | -5 | 318.397 | 19.9841 | 8  |
| -6  | 1  | -5 | 312.571 | 19.8153 | 8  |
| -7  | -1 | -5 | 47.7799 | 3.83964 | 8  |
| 7   | 1  | 5  | 48.9365 | 8.98930 | 13 |
| -7  | 1  | -5 | 42.6028 | 3.67383 | 8  |
| -8  | -1 | -5 | 29.8850 | 2.54670 | 8  |
| 8   | 1  | 5  | 26.8239 | 4.04599 | 13 |
| 10  | -2 | -5 | 4.06028 | 2.64201 | 13 |
| 10  | 2  | -5 | 6.92418 | 2.96098 | 13 |
| -10 | 2  | 5  | 2.77155 | 1.90111 | 7  |
| -9  | -2 | 5  | 0.95062 | 1.77535 | 10 |
| 9   | -2 | -5 | -0.0522 | 2.92274 | 13 |
| -9  | -2 | 5  | 1.16838 | 1.24338 | 11 |
| 9   | 2  | -5 | 0.36181 | 3.18597 | 13 |
| -9  | 2  | 5  | 0.63657 | 1.69425 | 7  |
| -8  | -2 | 5  | 7.33475 | 2.40970 | 10 |
| 8   | -2 | -5 | 5.81963 | 3.13513 | 13 |
| -8  | 2  | 5  | 8.77789 | 1.66538 | 11 |
| 8   | 2  | -5 | 8.30295 | 3.64415 | 13 |
| -7  | -2 | 5  | 116.698 | 8.80401 | 10 |
| 7   | -2 | -5 | 108.269 | 9.99624 | 13 |
| -7  | -2 | 5  | 89.4439 | 9.43287 | 1  |
| -7  | 2  | 5  | 113.668 | 8.30960 | 10 |



|    |    |    |         |         |    |
|----|----|----|---------|---------|----|
| 7  | 2  | -5 | 114.962 | 10.3146 | 13 |
| -6 | -2 | 5  | 96.7431 | 9.42315 | 1  |
| -5 | -2 | 5  | 14.6719 | 3.37862 | 5  |
| -5 | -2 | 5  | 16.9476 | 4.30457 | 1  |
| -4 | -2 | 5  | 651.346 | 46.2862 | 1  |
| -4 | -2 | 5  | 640.627 | 46.6003 | 5  |
| -4 | 2  | 5  | 789.181 | 46.0686 | 1  |
| -4 | 2  | 5  | 804.119 | 45.2614 | 5  |
| -3 | -2 | 5  | 318.745 | 21.2427 | 1  |
| -3 | -2 | 5  | 322.914 | 21.7938 | 5  |
| -3 | 2  | 5  | 281.234 | 20.5026 | 1  |
| -3 | 2  | 5  | 304.532 | 20.8343 | 5  |
| 2  | -2 | -5 | 655.692 | 41.1893 | 2  |
| -2 | -2 | 5  | 664.910 | 42.5929 | 5  |
| -2 | 2  | 5  | 651.840 | 42.1523 | 5  |
| 1  | -2 | -5 | 50.3003 | 4.70450 | 2  |
| -1 | 2  | 5  | 56.2828 | 6.24858 | 5  |
| 0  | -2 | -5 | 385.620 | 25.4798 | 5  |
| 0  | -2 | -5 | 365.068 | 24.9837 | 2  |
| 0  | 2  | -5 | 395.259 | 24.5755 | 3  |
| 0  | 2  | -5 | 391.589 | 24.6747 | 4  |
| 0  | 2  | -5 | 423.675 | 25.2005 | 5  |
| 0  | 2  | -5 | 397.189 | 24.8265 | 5  |
| -1 | -2 | -5 | 7.10908 | 1.84006 | 4  |
| -1 | -2 | -5 | 6.52746 | 2.02015 | 5  |
| -1 | -2 | -5 | 7.30499 | 1.96146 | 2  |
| -1 | 2  | -5 | 0.61614 | 1.11744 | 4  |
| -1 | 2  | -5 | 0.38599 | 1.05161 | 4  |
| -1 | 2  | -5 | 0.46482 | 1.03273 | 3  |
| -2 | -2 | -5 | 92.2070 | 7.70509 | 1  |
| -2 | -2 | -5 | 93.6108 | 6.92717 | 4  |
| -2 | -2 | -5 | 91.7379 | 6.80712 | 5  |
| -2 | -2 | -5 | 90.3543 | 7.53567 | 2  |
| -2 | 2  | -5 | 83.5687 | 6.52524 | 1  |
| -2 | 2  | -5 | 87.8532 | 6.33891 | 4  |
| -2 | 2  | -5 | 96.3347 | 6.44217 | 3  |
| -3 | -2 | -5 | 80.2850 | 7.09772 | 2  |
| -3 | -2 | -5 | 75.6899 | 5.89849 | 4  |
| -3 | -2 | -5 | 70.8299 | 6.51407 | 1  |
| -3 | 2  | -5 | 77.0522 | 5.36561 | 4  |
| -3 | 2  | -5 | 70.1513 | 5.44709 | 3  |
| -3 | 2  | -5 | 68.6801 | 5.07814 | 4  |
| -4 | -2 | -5 | 130.895 | 11.3401 | 2  |
| -4 | -2 | -5 | 130.415 | 8.96666 | 1  |
| -4 | 2  | -5 | 100.710 | 7.39498 | 4  |
| -4 | 2  | -5 | 111.869 | 7.57770 | 4  |
| -4 | 2  | -5 | 104.911 | 8.03639 | 3  |
| -5 | -2 | -5 | 74.3514 | 5.72183 | 8  |
| -5 | 2  | -5 | 81.8336 | 5.67847 | 8  |
| -6 | -2 | -5 | 28.9375 | 3.04809 | 8  |

|    |    |    |         |         |    |
|----|----|----|---------|---------|----|
| -6 | 2  | -5 | 26.6089 | 2.79924 | 8  |
| 6  | 2  | 5  | 30.4135 | 5.07379 | 13 |
| -7 | -2 | -5 | 259.960 | 16.1109 | 8  |
| 7  | 2  | 5  | 241.849 | 17.5102 | 13 |
| -7 | 2  | -5 | 252.399 | 15.7521 | 8  |
| -8 | -2 | -5 | 8.30652 | 1.42755 | 8  |
| 8  | 2  | 5  | 7.43572 | 3.10095 | 13 |
| 10 | -3 | -5 | 1.07985 | 2.45982 | 13 |
| 10 | 3  | -5 | 5.31645 | 2.93962 | 13 |
| 9  | -3 | -5 | 5.00758 | 3.12045 | 13 |
| -9 | -3 | 5  | 10.5822 | 2.16691 | 10 |
| -9 | 3  | 5  | 6.67475 | 2.00102 | 7  |
| 9  | 3  | -5 | 9.59100 | 3.65640 | 13 |
| -8 | -3 | 5  | -1.2208 | 1.99200 | 10 |
| 8  | -3 | -5 | 2.66130 | 3.50936 | 13 |
| 8  | 3  | -5 | -0.0442 | 3.29120 | 13 |
| 8  | 3  | -5 | -0.6990 | 3.11748 | 13 |
| -8 | 3  | 5  | 3.85480 | 1.27577 | 11 |
| -7 | -3 | 5  | 47.9906 | 6.95730 | 1  |
| 7  | -3 | -5 | 59.9628 | 6.90270 | 13 |
| -7 | -3 | 5  | 58.2652 | 6.08890 | 10 |
| 7  | 3  | -5 | 49.3660 | 6.84642 | 13 |
| -7 | 3  | 5  | 51.9943 | 5.17553 | 10 |
| -6 | -3 | 5  | 73.9819 | 8.31305 | 1  |
| -6 | 3  | 5  | 61.1019 | 5.36544 | 4  |
| -5 | -3 | 5  | 22.7616 | 4.99435 | 1  |
| -5 | -3 | 5  | 18.6293 | 4.50598 | 5  |
| -4 | -3 | 5  | 7.43324 | 3.62696 | 5  |
| -4 | 3  | 5  | 14.2849 | 1.79006 | 5  |
| -4 | 3  | 5  | 14.6825 | 1.92990 | 5  |
| -4 | 3  | 5  | 15.2713 | 2.89429 | 4  |
| -3 | -3 | 5  | 516.216 | 32.6675 | 5  |
| -3 | -3 | 5  | 470.612 | 31.8046 | 1  |
| -3 | 3  | 5  | 463.832 | 31.0028 | 5  |
| 2  | -3 | -5 | 951.125 | 59.3553 | 2  |
| -2 | 3  | 5  | 960.720 | 60.0070 | 5  |
| 1  | -3 | -5 | 149.554 | 10.2636 | 2  |
| -1 | 3  | 5  | 143.723 | 11.1070 | 5  |
| 1  | 3  | -5 | 136.411 | 9.57541 | 4  |
| 0  | -3 | -5 | 757.003 | 54.4940 | 2  |
| 0  | -3 | -5 | 785.035 | 54.8752 | 5  |
| 0  | 3  | -5 | 931.649 | 54.1919 | 5  |
| 0  | 3  | -5 | 933.869 | 54.0325 | 5  |
| 0  | 3  | -5 | 935.878 | 54.0497 | 3  |
| 0  | 3  | -5 | 940.337 | 54.0681 | 4  |
| -1 | -3 | -5 | 21.1390 | 3.34457 | 2  |
| -1 | -3 | -5 | 26.2728 | 3.34136 | 5  |
| -1 | 3  | -5 | 18.7554 | 2.37029 | 4  |
| -1 | 3  | -5 | 19.4297 | 2.07514 | 4  |
| -1 | 3  | -5 | 19.6916 | 2.15215 | 3  |

|    |    |    |         |         |    |
|----|----|----|---------|---------|----|
| -2 | -3 | -5 | 119.920 | 9.23474 | 5  |
| -2 | -3 | -5 | 118.769 | 9.48465 | 2  |
| -2 | -3 | -5 | 122.070 | 9.88369 | 1  |
| -2 | 3  | -5 | 132.210 | 8.28842 | 4  |
| -2 | 3  | -5 | 126.560 | 8.36914 | 3  |
| -3 | 3  | -5 | 35.2540 | 2.68313 | 4  |
| -3 | 3  | -5 | 33.7293 | 2.87716 | 4  |
| -3 | 3  | -5 | 33.1467 | 3.05533 | 3  |
| -4 | -3 | -5 | 89.8445 | 7.81921 | 1  |
| -4 | -3 | -5 | 85.8639 | 8.56477 | 2  |
| -5 | -3 | -5 | 172.396 | 11.2699 | 8  |
| -5 | -3 | -5 | 177.527 | 11.8579 | 10 |
| -5 | 3  | -5 | 160.155 | 10.8898 | 8  |
| -6 | -3 | -5 | 62.3140 | 4.94181 | 8  |
| -6 | -3 | -5 | 63.4144 | 5.33363 | 10 |
| 6  | 3  | 5  | 61.1467 | 7.77302 | 13 |
| -6 | 3  | -5 | 56.8923 | 4.41449 | 8  |
| -7 | -3 | -5 | 61.9788 | 4.98731 | 8  |
| 7  | 3  | 5  | 65.8592 | 7.19511 | 13 |
| -7 | 3  | -5 | 51.3260 | 4.25119 | 9  |
| -8 | -3 | -5 | 5.09707 | 1.41931 | 8  |
| 8  | 3  | 5  | 4.16799 | 3.03434 | 13 |
| -8 | 3  | -5 | 3.53407 | 0.61188 | 6  |
| -8 | 3  | -5 | 6.07103 | 1.19342 | 9  |
| 10 | -4 | -5 | 4.39057 | 2.52191 | 13 |
| 10 | 4  | -5 | 5.22622 | 2.93568 | 13 |
| 9  | -4 | -5 | -2.1511 | 2.78250 | 13 |
| -9 | -4 | 5  | 2.46716 | 1.83112 | 10 |
| -9 | 4  | 5  | 1.58855 | 1.26308 | 7  |
| 9  | 4  | -5 | 1.28772 | 3.43033 | 13 |
| -8 | -4 | 5  | 0.59981 | 2.14150 | 10 |
| 8  | 4  | -5 | 0.16784 | 3.86891 | 13 |
| 8  | 4  | -5 | -0.2814 | 4.04703 | 13 |
| -7 | -4 | 5  | 93.9445 | 8.11884 | 10 |
| -7 | -4 | 5  | 99.7532 | 9.89151 | 1  |
| 7  | 4  | -5 | 94.7325 | 8.97114 | 13 |
| -6 | -4 | 5  | 64.8387 | 7.90265 | 1  |
| -5 | -4 | 5  | 26.1992 | 5.34715 | 1  |
| -5 | -4 | 5  | 20.9910 | 5.14200 | 5  |
| -4 | -4 | 5  | 894.141 | 55.6701 | 1  |
| -4 | -4 | 5  | 887.700 | 56.2584 | 5  |
| -4 | 4  | 5  | 819.110 | 53.3278 | 4  |
| -3 | -4 | 5  | 649.448 | 47.3881 | 1  |
| 3  | -4 | -5 | 788.171 | 47.1938 | 2  |
| -3 | 4  | 5  | 789.375 | 46.5591 | 5  |
| -3 | 4  | 5  | 745.120 | 45.8359 | 4  |
| 2  | -4 | -5 | 61.4919 | 5.87796 | 2  |
| -2 | 4  | 5  | 63.7314 | 6.32022 | 5  |
| 1  | -4 | -5 | 282.398 | 18.4387 | 2  |
| -1 | 4  | 5  | 282.051 | 19.1685 | 5  |

|    |    |    |         |         |    |
|----|----|----|---------|---------|----|
| 1  | 4  | -5 | 270.065 | 17.7091 | 4  |
| 0  | -4 | -5 | 223.438 | 13.7455 | 5  |
| 0  | 4  | -5 | 179.764 | 12.1066 | 4  |
| 0  | 4  | -5 | 182.115 | 11.5439 | 5  |
| 0  | 4  | -5 | 179.531 | 11.5518 | 5  |
| 0  | 4  | -5 | 176.074 | 12.0815 | 3  |
| -1 | -4 | -5 | 75.0220 | 6.79362 | 5  |
| -1 | -4 | -5 | 72.3438 | 6.72246 | 2  |
| -1 | 4  | -5 | 88.5989 | 5.56942 | 4  |
| -1 | 4  | -5 | 76.5358 | 5.52356 | 3  |
| -1 | 4  | -5 | 74.7805 | 5.45140 | 4  |
| -2 | -4 | -5 | 359.181 | 25.3873 | 1  |
| -2 | -4 | -5 | 382.367 | 25.1544 | 5  |
| -2 | -4 | -5 | 369.401 | 25.3498 | 2  |
| -2 | 4  | -5 | 404.612 | 23.7496 | 4  |
| -2 | 4  | -5 | 369.184 | 23.6300 | 4  |
| -2 | 4  | -5 | 411.949 | 23.9928 | 3  |
| -3 | -4 | -5 | 18.8320 | 3.51166 | 2  |
| -3 | -4 | -5 | 19.1527 | 2.52745 | 5  |
| -3 | -4 | -5 | 19.7591 | 4.05401 | 1  |
| -3 | 4  | -5 | 14.1097 | 1.42011 | 4  |
| -3 | 4  | -5 | 13.2727 | 1.36300 | 4  |
| -3 | 4  | -5 | 13.5470 | 1.95629 | 3  |
| -4 | -4 | -5 | 305.204 | 21.8370 | 2  |
| -4 | -4 | -5 | 304.741 | 21.0980 | 1  |
| -4 | 4  | -5 | 306.899 | 18.7032 | 6  |
| -5 | -4 | -5 | 19.3510 | 3.26919 | 10 |
| -5 | -4 | -5 | 13.4659 | 3.93491 | 2  |
| -5 | -4 | -5 | 14.6223 | 2.51854 | 8  |
| -5 | 4  | -5 | 16.1753 | 1.74159 | 9  |
| -5 | 4  | -5 | 18.4455 | 1.53666 | 6  |
| -5 | 4  | -5 | 16.4731 | 2.14605 | 8  |
| -6 | -4 | -5 | 199.180 | 13.1941 | 10 |
| -6 | -4 | -5 | 201.749 | 12.9866 | 8  |
| -6 | 4  | -5 | 181.861 | 12.2645 | 9  |
| 6  | 4  | 5  | 194.920 | 14.3239 | 13 |
| -6 | 4  | -5 | 196.648 | 12.0657 | 6  |
| -7 | -4 | -5 | 64.0659 | 5.16425 | 8  |
| -7 | 4  | -5 | 57.0494 | 3.94542 | 6  |
| 7  | 4  | 5  | 60.4544 | 7.24995 | 13 |
| -7 | 4  | -5 | 60.6775 | 4.23564 | 9  |
| -8 | -4 | -5 | -0.2339 | 1.36950 | 8  |
| -8 | 4  | -5 | -0.5625 | 0.91143 | 9  |
| 8  | 4  | 5  | 2.42505 | 3.09225 | 13 |
| -8 | 4  | -5 | 0.21585 | 0.46683 | 6  |
| 10 | -5 | -5 | 10.6989 | 2.98844 | 13 |
| 10 | 5  | -5 | 10.6639 | 3.48534 | 13 |
| 9  | -5 | -5 | 3.69388 | 3.28675 | 13 |
| -9 | -5 | 5  | 17.3574 | 3.07639 | 10 |
| -9 | 5  | 5  | 10.2794 | 2.23106 | 7  |

|    |    |    |         |         |    |
|----|----|----|---------|---------|----|
| 9  | 5  | -5 | 10.7892 | 3.84263 | 13 |
| -8 | 5  | 5  | 20.7451 | 2.96556 | 7  |
| 8  | 5  | -5 | 11.1907 | 3.96623 | 13 |
| -8 | 5  | 5  | 18.1015 | 1.81436 | 11 |
| -7 | -5 | 5  | 46.5054 | 7.47557 | 1  |
| -7 | -5 | 5  | 44.0703 | 5.39626 | 10 |
| 7  | 5  | -5 | 47.5806 | 6.47670 | 13 |
| -7 | 5  | 5  | 41.6090 | 3.52877 | 11 |
| -6 | -5 | 5  | 115.763 | 11.1650 | 1  |
| -5 | -5 | 5  | 221.802 | 18.7568 | 5  |
| -5 | -5 | 5  | 243.141 | 18.6386 | 1  |
| -5 | 5  | 5  | 271.319 | 16.1462 | 4  |
| -4 | -5 | 5  | 359.825 | 23.4609 | 1  |
| -4 | -5 | 5  | 351.011 | 23.9051 | 5  |
| -4 | 5  | 5  | 273.164 | 20.5701 | 4  |
| -3 | -5 | 5  | 388.545 | 23.5582 | 1  |
| 3  | -5 | -5 | 322.561 | 22.4908 | 2  |
| -3 | 5  | 5  | 318.001 | 21.2386 | 5  |
| -3 | 5  | 5  | 309.742 | 21.0512 | 4  |
| 2  | -5 | -5 | 129.234 | 9.93681 | 2  |
| -2 | 5  | 5  | 128.144 | 10.0702 | 5  |
| 1  | -5 | -5 | 114.952 | 8.94489 | 2  |
| -1 | 5  | 5  | 114.120 | 9.49388 | 5  |
| 0  | -5 | -5 | 103.657 | 8.00264 | 2  |
| 0  | -5 | -5 | 99.3932 | 8.21128 | 5  |
| 0  | 5  | -5 | 96.6428 | 6.78285 | 4  |
| 0  | 5  | -5 | 92.3332 | 6.72808 | 3  |
| 0  | 5  | -5 | 101.516 | 7.07548 | 4  |
| 0  | 5  | 5  | 99.2994 | 8.69952 | 5  |
| -1 | -5 | -5 | 279.945 | 20.2414 | 1  |
| -1 | -5 | -5 | 290.061 | 19.9725 | 2  |
| -1 | -5 | -5 | 299.903 | 20.1729 | 5  |
| -1 | 5  | -5 | 303.975 | 18.5638 | 4  |
| -1 | 5  | -5 | 300.411 | 18.6657 | 3  |
| -1 | 5  | -5 | 303.990 | 18.5408 | 4  |
| -2 | -5 | -5 | 3.26154 | 2.25786 | 5  |
| -2 | -5 | -5 | 3.75091 | 2.10766 | 2  |
| -2 | -5 | -5 | 3.52748 | 2.28085 | 1  |
| -2 | 5  | -5 | 3.98190 | 0.83200 | 4  |
| -2 | 5  | -5 | 3.58646 | 0.82571 | 4  |
| -3 | -5 | -5 | 150.065 | 11.6572 | 1  |
| -3 | -5 | -5 | 157.745 | 12.0358 | 2  |
| -3 | -5 | -5 | 151.490 | 10.9014 | 5  |
| -3 | 5  | -5 | 134.639 | 9.73891 | 3  |
| -4 | -5 | -5 | 11.6558 | 1.97418 | 8  |
| -4 | -5 | -5 | 12.9474 | 3.53374 | 1  |
| -4 | -5 | -5 | 11.2151 | 3.35004 | 2  |
| -4 | 5  | -5 | 11.5832 | 1.15095 | 6  |
| -4 | 5  | -5 | 10.5250 | 1.77068 | 3  |
| -5 | -5 | -5 | 47.9275 | 6.57452 | 2  |

|    |    |    |         |         |    |
|----|----|----|---------|---------|----|
| -5 | -5 | -5 | 41.7143 | 4.83240 | 10 |
| -5 | -5 | -5 | 42.2987 | 5.44107 | 1  |
| -5 | -5 | -5 | 41.9917 | 5.32422 | 10 |
| -5 | -5 | -5 | 39.7975 | 4.17523 | 8  |
| -5 | 5  | -5 | 42.2035 | 3.10355 | 9  |
| -5 | 5  | -5 | 39.9546 | 2.87369 | 6  |
| -6 | -5 | -5 | 360.906 | 24.4259 | 8  |
| -6 | -5 | -5 | 387.184 | 24.8624 | 10 |
| -6 | 5  | -5 | 406.375 | 23.6426 | 6  |
| 6  | 5  | 5  | 360.375 | 25.7946 | 13 |
| -6 | 5  | -5 | 417.200 | 23.8489 | 9  |
| -7 | -5 | -5 | 105.511 | 7.17216 | 8  |
| -7 | 5  | -5 | 97.0663 | 6.38614 | 9  |
| -7 | 5  | -5 | 92.3084 | 6.13712 | 6  |
| 7  | 5  | 5  | 97.0695 | 9.13714 | 13 |
| -8 | -5 | -5 | 2.13329 | 1.51740 | 8  |
| -8 | 5  | -5 | 2.09077 | 0.44079 | 6  |
| 8  | 5  | 5  | 0.10586 | 2.98551 | 13 |
| -8 | 5  | -5 | 2.11724 | 0.80622 | 9  |
| 10 | -6 | -5 | 14.5705 | 2.69221 | 13 |
| 10 | 6  | -5 | 14.2820 | 3.13378 | 13 |
| -9 | -6 | 5  | 7.49754 | 2.53038 | 10 |
| -9 | 6  | 5  | 7.36204 | 1.73860 | 7  |
| -8 | -6 | 5  | 18.3088 | 4.12919 | 1  |
| -8 | -6 | 5  | 12.4652 | 3.05987 | 10 |
| -8 | 6  | 5  | 11.3058 | 1.30536 | 11 |
| 8  | 6  | -5 | 19.4374 | 4.96179 | 13 |
| -8 | 6  | 5  | 9.61518 | 2.36304 | 7  |
| -7 | -6 | 5  | 45.0191 | 5.36427 | 10 |
| -7 | -6 | 5  | 48.9190 | 7.98065 | 1  |
| 7  | 6  | -5 | 37.5175 | 6.05800 | 13 |
| -7 | 6  | 5  | 41.5048 | 3.30338 | 11 |
| 7  | 6  | -5 | 40.0585 | 6.18566 | 13 |
| -6 | -6 | 5  | 71.6193 | 9.30145 | 1  |
| -5 | -6 | 5  | 21.7359 | 5.17017 | 5  |
| -5 | -6 | 5  | 18.4350 | 5.05915 | 1  |
| -5 | 6  | 5  | 14.8319 | 2.27468 | 4  |
| 4  | -6 | -5 | 761.150 | 44.8215 | 2  |
| -4 | -6 | 5  | 613.432 | 44.6795 | 1  |
| -3 | -6 | 5  | 170.784 | 12.5423 | 1  |
| 3  | -6 | -5 | 136.757 | 11.3388 | 2  |
| -3 | 6  | 5  | 138.497 | 9.94622 | 4  |
| 2  | -6 | -5 | 78.2732 | 7.22064 | 2  |
| -2 | 6  | 5  | 75.8269 | 6.58028 | 5  |
| 1  | -6 | -5 | 14.1917 | 2.84854 | 2  |
| -1 | 6  | 5  | 13.6295 | 3.67836 | 5  |
| 0  | -6 | -5 | 38.8553 | 5.03684 | 2  |
| 0  | 6  | 5  | 50.0920 | 5.82427 | 5  |
| 0  | 6  | -5 | 52.3811 | 4.02360 | 4  |
| 0  | 6  | -5 | 47.2618 | 3.67930 | 4  |

|    |    |    |         |         |    |
|----|----|----|---------|---------|----|
| -1 | -6 | -5 | 5.67499 | 2.90882 | 1  |
| -1 | -6 | -5 | 6.53643 | 2.75253 | 5  |
| -1 | -6 | -5 | 7.73176 | 2.50388 | 2  |
| -1 | 6  | -5 | 12.2047 | 1.44385 | 4  |
| -1 | 6  | -5 | 12.4633 | 1.62160 | 4  |
| -1 | 6  | -5 | 13.0986 | 1.57226 | 3  |
| -2 | -6 | -5 | 26.6531 | 5.08051 | 1  |
| -2 | -6 | -5 | 28.2663 | 4.24060 | 2  |
| -2 | -6 | -5 | 26.1282 | 4.50453 | 5  |
| -2 | 6  | -5 | 29.0919 | 2.60751 | 3  |
| -2 | 6  | -5 | 32.2219 | 2.11892 | 4  |
| -2 | 6  | -5 | 29.5120 | 2.09454 | 4  |
| -3 | -6 | -5 | 32.8393 | 5.28826 | 2  |
| -3 | -6 | -5 | 35.2769 | 4.51753 | 5  |
| -3 | -6 | -5 | 30.0557 | 4.89682 | 1  |
| -4 | -6 | -5 | 371.683 | 25.0292 | 2  |
| -4 | -6 | -5 | 369.951 | 24.4914 | 1  |
| -4 | -6 | -5 | 349.561 | 22.1263 | 8  |
| -4 | 6  | -5 | 340.548 | 21.3099 | 6  |
| -4 | 6  | -5 | 322.677 | 21.9987 | 3  |
| -5 | -6 | -5 | 268.069 | 17.8866 | 1  |
| -5 | -6 | -5 | 251.979 | 16.5111 | 10 |
| -5 | -6 | -5 | 245.810 | 19.0377 | 2  |
| -5 | -6 | -5 | 253.961 | 16.4974 | 10 |
| -5 | -6 | -5 | 246.307 | 15.8087 | 8  |
| -5 | 6  | -5 | 224.220 | 14.9833 | 9  |
| 5  | 6  | 5  | 235.339 | 17.1720 | 13 |
| -5 | 6  | -5 | 230.307 | 16.2003 | 12 |
| -5 | 6  | -5 | 230.205 | 14.8560 | 6  |
| -6 | -6 | -5 | 4.26456 | 2.06809 | 10 |
| -6 | -6 | -5 | 5.03811 | 1.86230 | 8  |
| 6  | 6  | 5  | 7.33679 | 4.32518 | 13 |
| -6 | 6  | -5 | 5.19586 | 1.04090 | 9  |
| -6 | 6  | -5 | 5.22570 | 0.76090 | 6  |
| -6 | 6  | -5 | 5.00939 | 2.28389 | 12 |
| -7 | -6 | -5 | 53.1598 | 4.53156 | 10 |
| -7 | -6 | -5 | 53.7908 | 4.63680 | 8  |
| -7 | 6  | -5 | 51.9483 | 3.34990 | 6  |
| -7 | 6  | -5 | 48.6613 | 3.56722 | 9  |
| 7  | 6  | 5  | 42.0523 | 8.14140 | 13 |
| -8 | -6 | -5 | 13.6486 | 2.12015 | 8  |
| -8 | 6  | -5 | 11.9032 | 0.92531 | 6  |
| -8 | 6  | -5 | 13.5403 | 1.32845 | 9  |
| 8  | 6  | 5  | 9.01285 | 3.21802 | 13 |
| 10 | 7  | -5 | 5.19725 | 2.47442 | 13 |
| -9 | -7 | 5  | 2.07547 | 2.19161 | 10 |
| -9 | 7  | 5  | 3.43908 | 1.85670 | 7  |
| -8 | -7 | 5  | 7.59139 | 2.98285 | 10 |
| -8 | -7 | 5  | 6.07855 | 3.05257 | 1  |
| -8 | 7  | 5  | 5.30791 | 2.11039 | 7  |

|    |    |    |         |         |    |
|----|----|----|---------|---------|----|
| 8  | 7  | -5 | 10.0130 | 4.92815 | 13 |
| -7 | -7 | 5  | 166.540 | 14.7759 | 1  |
| -7 | -7 | 5  | 163.991 | 12.6311 | 10 |
| 7  | 7  | -5 | 177.421 | 13.4711 | 13 |
| -7 | 7  | 5  | 167.816 | 10.6902 | 11 |
| -7 | 7  | 5  | 169.442 | 11.7423 | 7  |
| -6 | -7 | 5  | 63.5858 | 8.34212 | 1  |
| 6  | -7 | -5 | 74.3889 | 9.37485 | 2  |
| -6 | -7 | 5  | 54.2407 | 6.27218 | 10 |
| 5  | -7 | -5 | 11.1763 | 4.34400 | 2  |
| -5 | 7  | 5  | 10.1621 | 1.83796 | 4  |
| -4 | -7 | 5  | 40.7932 | 7.07986 | 1  |
| 4  | -7 | -5 | 56.9119 | 6.50895 | 2  |
| -4 | 7  | 5  | 56.0201 | 4.29079 | 4  |
| 3  | -7 | -5 | 651.605 | 41.5548 | 2  |
| -3 | 7  | 5  | 636.078 | 39.8699 | 4  |
| 2  | -7 | -5 | 695.272 | 44.9699 | 2  |
| -2 | 7  | 5  | 714.487 | 44.1320 | 5  |
| 1  | -7 | -5 | 106.252 | 8.37790 | 2  |
| 1  | 7  | -5 | 89.5852 | 6.86784 | 5  |
| 1  | 7  | -5 | 91.5236 | 6.85760 | 4  |
| -1 | 7  | 5  | 110.179 | 8.56463 | 5  |
| 0  | -7 | -5 | 33.7271 | 5.11151 | 2  |
| 0  | 7  | 5  | 30.6924 | 4.78054 | 5  |
| -1 | -7 | -5 | 32.8792 | 4.38085 | 2  |
| -1 | -7 | -5 | 28.8892 | 4.56820 | 1  |
| -1 | 7  | -5 | 28.1613 | 2.39196 | 4  |
| -1 | 7  | -5 | 26.0401 | 2.42569 | 3  |
| -1 | 7  | -5 | 25.5301 | 2.29402 | 4  |
| -2 | -7 | -5 | 124.382 | 10.0055 | 2  |
| -2 | -7 | -5 | 111.908 | 9.95738 | 1  |
| -2 | -7 | -5 | 113.264 | 9.92559 | 5  |
| -2 | 7  | -5 | 114.160 | 7.70371 | 3  |
| -3 | -7 | -5 | 405.475 | 27.5328 | 1  |
| -3 | -7 | -5 | 427.653 | 27.3141 | 5  |
| -3 | -7 | -5 | 410.009 | 27.7884 | 2  |
| -3 | 7  | -5 | 368.685 | 24.9860 | 3  |
| -4 | -7 | -5 | 95.2710 | 6.90575 | 8  |
| -4 | -7 | -5 | 107.096 | 9.76251 | 1  |
| -4 | -7 | -5 | 100.245 | 9.64390 | 2  |
| -4 | 7  | -5 | 89.7425 | 6.49207 | 3  |
| -4 | 7  | -5 | 87.3814 | 5.98151 | 9  |
| -4 | 7  | -5 | 91.8087 | 5.85697 | 6  |
| -5 | -7 | -5 | 2.72697 | 1.92656 | 8  |
| -5 | -7 | -5 | 9.88536 | 3.61784 | 10 |
| -5 | -7 | -5 | 7.75166 | 3.13827 | 10 |
| -5 | -7 | -5 | 4.84873 | 3.26570 | 1  |
| -5 | -7 | -5 | 1.35118 | 3.07379 | 2  |
| -6 | -7 | -5 | 31.0688 | 3.95806 | 10 |
| -6 | -7 | -5 | 28.5681 | 4.00830 | 8  |



|    |    |    |         |         |    |
|----|----|----|---------|---------|----|
| -6 | 7  | -5 | 25.8714 | 2.26562 | 9  |
| -6 | 7  | -5 | 25.6789 | 1.97263 | 6  |
| 6  | 7  | 5  | 31.8047 | 5.59835 | 13 |
| -6 | 7  | -5 | 26.6437 | 4.07125 | 12 |
| -7 | -7 | -5 | 3.30811 | 1.75837 | 10 |
| -7 | -7 | -5 | 3.48412 | 1.82661 | 8  |
| -7 | 7  | -5 | 1.08573 | 0.48450 | 6  |
| 7  | 7  | 5  | 8.69717 | 3.83162 | 13 |
| -7 | 7  | -5 | 2.87466 | 0.80727 | 9  |
| -7 | 7  | -5 | 1.26813 | 0.52654 | 6  |
| -8 | 7  | -5 | 9.72792 | 1.03127 | 9  |
| -8 | 7  | -5 | 11.9418 | 1.08085 | 9  |
| -9 | -8 | 5  | 2.22819 | 2.15076 | 10 |
| -9 | 8  | 5  | -1.0155 | 1.58252 | 7  |
| 9  | 8  | -5 | 1.51076 | 3.80999 | 13 |
| -8 | -8 | 5  | 1.66491 | 2.51177 | 10 |
| -8 | 8  | 5  | 7.88897 | 2.19559 | 7  |
| 8  | 8  | -5 | -1.2412 | 4.34541 | 13 |
| -7 | -8 | 5  | 106.245 | 10.6512 | 1  |
| 7  | 8  | -5 | 100.094 | 9.31917 | 13 |
| -7 | 8  | 5  | 69.1620 | 5.24066 | 11 |
| -7 | 8  | 5  | 76.3323 | 6.40035 | 7  |
| -6 | -8 | 5  | 154.085 | 11.9269 | 10 |
| -6 | -8 | 5  | 155.749 | 14.4423 | 1  |
| 6  | -8 | -5 | 156.601 | 14.0432 | 2  |
| -6 | 8  | 5  | 142.064 | 9.65236 | 11 |
| 5  | -8 | -5 | 35.9970 | 6.29807 | 2  |
| -5 | 8  | 5  | 37.2566 | 3.37542 | 4  |
| 4  | -8 | -5 | 49.9499 | 6.34196 | 2  |
| -4 | 8  | 5  | 43.6804 | 3.92835 | 4  |
| 3  | -8 | -5 | 50.4355 | 6.47004 | 2  |
| -3 | 8  | 5  | 52.0569 | 4.25018 | 4  |
| 2  | -8 | -5 | 269.964 | 18.9876 | 2  |
| 1  | -8 | -5 | 194.110 | 14.0132 | 2  |
| 1  | 8  | -5 | 181.892 | 12.1981 | 4  |
| 1  | 8  | -5 | 168.493 | 12.1933 | 4  |
| -1 | 8  | 5  | 203.854 | 13.5559 | 5  |
| 0  | -8 | -5 | 62.9301 | 6.52378 | 2  |
| 0  | 8  | 5  | 56.4840 | 6.71027 | 5  |
| 0  | 8  | -5 | 62.8243 | 4.48491 | 4  |
| 0  | 8  | -5 | 59.9133 | 4.48189 | 4  |
| -1 | -8 | -5 | -0.1875 | 2.02834 | 1  |
| -1 | -8 | -5 | 0.89672 | 2.07887 | 2  |
| -1 | 8  | -5 | 1.30261 | 0.73280 | 4  |
| -1 | 8  | -5 | 1.22641 | 0.73488 | 4  |
| -2 | -8 | -5 | 24.6197 | 4.46254 | 2  |
| -2 | -8 | -5 | 23.6089 | 4.55472 | 5  |
| -2 | -8 | -5 | 21.3197 | 4.53202 | 1  |
| -2 | 8  | -5 | 20.1671 | 2.05331 | 3  |
| -3 | -8 | -5 | 93.3686 | 9.45913 | 1  |

|    |    |    |         |         |    |
|----|----|----|---------|---------|----|
| -3 | -8 | -5 | 93.4442 | 9.23333 | 5  |
| -3 | -8 | -5 | 91.3642 | 9.45722 | 2  |
| -3 | 8  | -5 | 105.117 | 6.84174 | 3  |
| -3 | 8  | -5 | 109.505 | 6.37543 | 6  |
| -3 | 8  | -5 | 109.834 | 6.93755 | 3  |
| -4 | -8 | -5 | 5.33825 | 3.32427 | 2  |
| -4 | -8 | -5 | 6.15124 | 3.39162 | 1  |
| -4 | -8 | -5 | 6.84237 | 2.18097 | 8  |
| -4 | 8  | -5 | 8.15294 | 1.29443 | 3  |
| -4 | 8  | -5 | 8.53413 | 0.98165 | 9  |
| -4 | 8  | -5 | 7.96478 | 0.84842 | 6  |
| -5 | -8 | -5 | 27.5817 | 5.33773 | 1  |
| -5 | -8 | -5 | 21.7513 | 4.04792 | 10 |
| -5 | -8 | -5 | 23.0650 | 4.35770 | 10 |
| -5 | -8 | -5 | 23.6377 | 3.35614 | 8  |
| -5 | 8  | -5 | 17.2464 | 1.80503 | 9  |
| -5 | 8  | -5 | 19.6125 | 3.51131 | 12 |
| -5 | 8  | -5 | 16.9590 | 1.46176 | 6  |
| -6 | -8 | -5 | 461.515 | 29.7309 | 10 |
| -6 | -8 | -5 | 475.253 | 29.2425 | 8  |
| -6 | 8  | -5 | 455.040 | 29.5196 | 12 |
| -6 | 8  | -5 | 472.124 | 28.1260 | 6  |
| -6 | 8  | -5 | 448.050 | 28.1045 | 6  |
| 6  | 8  | 5  | 477.190 | 30.4598 | 13 |
| -6 | 8  | -5 | 453.115 | 28.2737 | 9  |
| -7 | -8 | -5 | 58.8207 | 4.81163 | 8  |
| -7 | -8 | -5 | 57.7375 | 4.82379 | 10 |
| -7 | 8  | -5 | 50.5132 | 3.30198 | 6  |
| 7  | 8  | 5  | 60.4881 | 7.17899 | 13 |
| -7 | 8  | -5 | 50.2425 | 3.50420 | 9  |
| -7 | 8  | -5 | 48.8947 | 3.28466 | 6  |
| -8 | -8 | -5 | 18.9099 | 2.48559 | 8  |
| 8  | 8  | 5  | 20.7970 | 3.52173 | 13 |
| -9 | -9 | 5  | 8.48242 | 2.12328 | 10 |
| 9  | 9  | -5 | 7.19911 | 3.30551 | 13 |
| -9 | 9  | 5  | 3.67435 | 1.84660 | 7  |
| -8 | -9 | 5  | 2.10646 | 2.62282 | 10 |
| -8 | 9  | 5  | 5.05853 | 2.06508 | 7  |
| 8  | 9  | -5 | 1.73281 | 3.42121 | 13 |
| -7 | -9 | 5  | 61.8722 | 6.63693 | 10 |
| -7 | -9 | 5  | 61.1691 | 9.55903 | 1  |
| 7  | 9  | -5 | 60.2301 | 8.01185 | 13 |
| -7 | 9  | 5  | 65.1089 | 5.46020 | 7  |
| -6 | -9 | 5  | 13.9457 | 3.28737 | 10 |
| 6  | -9 | -5 | 9.72496 | 4.31885 | 2  |
| -6 | -9 | 5  | 7.57450 | 4.23840 | 1  |
| -6 | 9  | 5  | 10.8195 | 1.39689 | 11 |
| -6 | 9  | 5  | 12.4335 | 2.54576 | 7  |
| 5  | -9 | -5 | 14.9117 | 4.43915 | 2  |
| -5 | -9 | 5  | 13.3716 | 5.35165 | 1  |

|    |    |    |         |         |    |
|----|----|----|---------|---------|----|
| -5 | 9  | 5  | 17.1286 | 2.57542 | 7  |
| -4 | -9 | 5  | 9.09969 | 4.53810 | 1  |
| 4  | -9 | -5 | 18.7185 | 4.32589 | 2  |
| -4 | 9  | 5  | 17.0168 | 2.41325 | 4  |
| 3  | -9 | -5 | 21.7268 | 4.32194 | 2  |
| -3 | 9  | 5  | 20.3200 | 2.48417 | 4  |
| 2  | -9 | -5 | 258.386 | 18.5156 | 2  |
| 1  | -9 | -5 | 171.673 | 13.1655 | 2  |
| -1 | 9  | 5  | 164.040 | 12.1623 | 5  |
| 0  | -9 | -5 | 1.24218 | 2.59559 | 2  |
| 0  | 9  | 5  | 1.05171 | 2.08177 | 5  |
| -1 | -9 | -5 | 315.648 | 21.8430 | 2  |
| -1 | -9 | -5 | 304.172 | 22.0669 | 1  |
| -1 | 9  | -5 | 321.499 | 19.3788 | 4  |
| -1 | 9  | -5 | 312.775 | 19.3465 | 4  |
| -2 | -9 | -5 | 212.879 | 16.3668 | 1  |
| -2 | -9 | -5 | 213.565 | 16.0355 | 2  |
| -3 | -9 | -5 | 47.6145 | 7.11383 | 1  |
| -3 | -9 | -5 | 44.3850 | 6.04968 | 5  |
| -3 | -9 | -5 | 39.8176 | 6.32606 | 2  |
| -3 | 9  | -5 | 51.6716 | 3.66348 | 3  |
| -3 | 9  | -5 | 50.1986 | 3.09776 | 6  |
| -3 | 9  | -5 | 50.5424 | 3.59373 | 3  |
| -4 | -9 | -5 | 5.38922 | 3.40128 | 1  |
| -4 | -9 | -5 | 5.35389 | 2.68179 | 10 |
| -4 | -9 | -5 | 5.74906 | 2.25358 | 8  |
| -4 | -9 | -5 | 7.27336 | 4.21455 | 2  |
| -4 | 9  | -5 | 2.99465 | 0.65647 | 9  |
| -4 | 9  | -5 | 1.10797 | 0.39880 | 6  |
| -4 | 9  | -5 | 1.63220 | 0.46284 | 6  |
| -4 | 9  | -5 | 1.43533 | 0.72245 | 3  |
| -5 | -9 | -5 | 142.952 | 10.4947 | 10 |
| -5 | -9 | -5 | 144.693 | 10.7197 | 10 |
| -5 | -9 | -5 | 144.959 | 9.83561 | 8  |
| -5 | -9 | -5 | 156.347 | 12.6674 | 1  |
| -5 | 9  | -5 | 128.548 | 10.4331 | 12 |
| -5 | 9  | -5 | 130.829 | 8.57312 | 9  |
| -5 | 9  | -5 | 128.075 | 8.42817 | 6  |
| -5 | 9  | -5 | 128.609 | 8.45592 | 6  |
| 5  | 9  | 5  | 146.272 | 12.0373 | 13 |
| -6 | -9 | -5 | 15.8682 | 2.72604 | 8  |
| -6 | -9 | -5 | 12.9754 | 2.94476 | 10 |
| -6 | 9  | -5 | 16.8025 | 1.24158 | 6  |
| 6  | 9  | 5  | 16.7617 | 5.07091 | 13 |
| -6 | 9  | -5 | 18.4968 | 1.27341 | 6  |
| -6 | 9  | -5 | 15.4381 | 3.09083 | 12 |
| -6 | 9  | -5 | 17.9978 | 1.57028 | 9  |
| -7 | -9 | -5 | 46.7080 | 4.54925 | 8  |
| -7 | -9 | -5 | 46.7624 | 4.49203 | 10 |
| 7  | 9  | 5  | 53.1961 | 6.85787 | 13 |

|    |     |    |         |         |    |
|----|-----|----|---------|---------|----|
| -7 | 9   | -5 | 47.1444 | 3.11391 | 9  |
| -7 | 9   | -5 | 48.5055 | 3.08522 | 9  |
| -7 | 9   | -5 | 41.7706 | 4.97607 | 12 |
| 8  | 9   | 5  | 16.8093 | 3.21032 | 13 |
| -9 | -10 | 5  | 5.67320 | 2.42591 | 10 |
| 9  | 10  | -5 | 3.55560 | 3.46135 | 13 |
| -9 | 10  | 5  | 4.64505 | 0.80777 | 9  |
| -9 | 10  | 5  | 2.74505 | 1.67861 | 7  |
| -8 | -10 | 5  | 10.7656 | 3.31759 | 10 |
| 8  | 10  | -5 | 10.5509 | 4.40020 | 13 |
| -7 | -10 | 5  | 26.0657 | 6.19970 | 1  |
| -7 | -10 | 5  | 22.9404 | 4.53069 | 10 |
| 7  | 10  | -5 | 23.2490 | 4.21432 | 13 |
| -7 | 10  | 5  | 26.4578 | 3.53084 | 7  |
| -6 | -10 | 5  | 5.15579 | 4.11756 | 1  |
| -6 | -10 | 5  | 2.95139 | 2.68113 | 10 |
| 6  | 10  | -5 | 2.58652 | 3.67807 | 13 |
| 5  | -10 | -5 | 18.4063 | 5.28118 | 2  |
| -5 | -10 | 5  | 14.1522 | 4.89516 | 1  |
| -5 | 10  | 5  | 14.2628 | 2.20435 | 7  |
| 4  | -10 | -5 | 4.19601 | 3.07338 | 2  |
| -4 | 10  | 5  | 3.57301 | 1.63439 | 4  |
| 3  | -10 | -5 | 117.843 | 10.4015 | 2  |
| -3 | 10  | 5  | 109.056 | 7.94937 | 4  |
| 2  | -10 | -5 | 62.5493 | 7.54911 | 2  |
| 1  | 10  | -5 | 104.687 | 7.43094 | 4  |
| 0  | -10 | -5 | 48.6998 | 6.26166 | 2  |
| 0  | 10  | -5 | 44.7142 | 3.61564 | 4  |
| -1 | -10 | -5 | 111.362 | 9.56260 | 2  |
| -1 | -10 | -5 | 114.107 | 9.87331 | 1  |
| -1 | 10  | -5 | 98.4835 | 6.54736 | 4  |
| -1 | 10  | -5 | 98.1082 | 6.56449 | 4  |
| -2 | -10 | -5 | 35.0139 | 5.48780 | 2  |
| -2 | -10 | -5 | 38.5482 | 6.64378 | 1  |
| -3 | -10 | -5 | 46.8099 | 6.96648 | 2  |
| -3 | -10 | -5 | 44.4099 | 7.21655 | 1  |
| -3 | 10  | -5 | 34.2457 | 2.36011 | 6  |
| -3 | 10  | -5 | 36.9633 | 2.84318 | 3  |
| -3 | 10  | -5 | 34.5706 | 2.34631 | 6  |
| -4 | -10 | -5 | 45.4517 | 7.67511 | 1  |
| -4 | -10 | -5 | 40.7074 | 5.36827 | 10 |
| -4 | -10 | -5 | 44.5465 | 7.09994 | 2  |
| -4 | 10  | -5 | 43.4441 | 2.89913 | 9  |
| -4 | 10  | -5 | 40.6647 | 2.72160 | 6  |
| -4 | 10  | -5 | 41.4229 | 2.68209 | 6  |
| -4 | 10  | -5 | 42.3109 | 6.37763 | 12 |
| -5 | -10 | -5 | 194.448 | 13.5713 | 10 |
| -5 | -10 | -5 | 198.852 | 16.1308 | 1  |
| -5 | -10 | -5 | 183.289 | 12.8616 | 8  |
| -5 | -10 | -5 | 198.529 | 13.8095 | 10 |

|    |     |    |         |         |    |
|----|-----|----|---------|---------|----|
| -5 | 10  | -5 | 175.616 | 11.4466 | 6  |
| 5  | 10  | 5  | 197.810 | 14.2501 | 13 |
| -5 | 10  | -5 | 179.519 | 11.5696 | 9  |
| -5 | 10  | -5 | 185.169 | 13.1941 | 12 |
| -6 | -10 | -5 | 37.5569 | 5.70601 | 1  |
| -6 | -10 | -5 | 31.9164 | 4.56388 | 10 |
| -6 | -10 | -5 | 36.4951 | 4.15515 | 8  |
| 6  | 10  | 5  | 42.1476 | 6.97596 | 13 |
| -6 | 10  | -5 | 29.6667 | 1.98032 | 6  |
| -6 | 10  | -5 | 30.9368 | 2.29734 | 9  |
| -6 | 10  | -5 | 29.4710 | 2.19711 | 9  |
| -6 | 10  | -5 | 29.1968 | 1.95728 | 6  |
| -7 | -10 | -5 | 6.06142 | 2.01900 | 8  |
| -7 | -10 | -5 | 4.89785 | 2.06094 | 10 |
| -7 | 10  | -5 | 2.19096 | 2.27955 | 12 |
| 8  | 10  | 5  | 19.7196 | 3.09755 | 13 |
| -9 | -11 | 5  | 11.9717 | 2.79346 | 10 |
| -9 | 11  | 5  | 14.4401 | 1.34842 | 9  |
| -9 | 11  | 5  | 14.2656 | 2.07411 | 7  |
| -8 | -11 | 5  | 16.2487 | 3.40956 | 10 |
| -8 | 11  | 5  | 11.9258 | 2.40713 | 7  |
| -7 | -11 | 5  | 53.4435 | 9.29316 | 1  |
| -7 | -11 | 5  | 58.1243 | 6.36162 | 10 |
| -7 | 11  | 5  | 49.1079 | 4.90623 | 7  |
| -6 | -11 | 5  | 71.1477 | 9.48565 | 1  |
| -6 | -11 | 5  | 66.2481 | 6.51211 | 10 |
| -6 | 11  | 5  | 52.6438 | 3.62835 | 11 |
| -6 | 11  | 5  | 52.3207 | 3.69142 | 11 |
| -6 | 11  | 5  | 47.0760 | 4.78406 | 7  |
| -5 | -11 | 5  | 13.8579 | 5.66934 | 1  |
| 5  | -11 | -5 | 9.30250 | 4.03054 | 2  |
| -5 | 11  | 5  | 11.2601 | 2.07543 | 7  |
| 4  | -11 | -5 | 19.1076 | 4.58141 | 2  |
| -4 | 11  | 5  | 15.1500 | 2.20511 | 4  |
| 3  | -11 | -5 | 107.256 | 10.0066 | 2  |
| -3 | 11  | 5  | 98.9055 | 7.36360 | 4  |
| 2  | -11 | -5 | 85.5476 | 8.99761 | 2  |
| 1  | -11 | -5 | 158.317 | 13.4536 | 2  |
| 1  | 11  | -5 | 181.599 | 11.4995 | 4  |
| 0  | -11 | -5 | 184.321 | 15.7686 | 2  |
| 0  | 11  | -5 | 223.055 | 13.2923 | 4  |
| -1 | -11 | -5 | 324.311 | 23.0883 | 2  |
| -2 | -11 | -5 | 183.042 | 14.6768 | 2  |
| -2 | -11 | -5 | 179.135 | 15.0222 | 1  |
| -2 | 11  | -5 | 186.166 | 11.2264 | 6  |
| -3 | -11 | -5 | 103.947 | 10.4339 | 1  |
| -3 | -11 | -5 | 103.379 | 10.2668 | 2  |
| -3 | 11  | -5 | 100.093 | 6.11318 | 6  |
| -3 | 11  | -5 | 99.3613 | 6.22885 | 9  |
| -3 | 11  | -5 | 95.0893 | 6.09244 | 6  |

|    |     |    |         |         |    |
|----|-----|----|---------|---------|----|
| -3 | 11  | -5 | 96.5289 | 6.52457 | 3  |
| -4 | -11 | -5 | 15.5700 | 4.97124 | 2  |
| -4 | -11 | -5 | 18.0610 | 4.98112 | 1  |
| -4 | -11 | -5 | 18.9347 | 3.71532 | 10 |
| -4 | -11 | -5 | 17.2036 | 3.90716 | 10 |
| -4 | 11  | -5 | 31.7009 | 4.22049 | 12 |
| -4 | 11  | -5 | 24.8610 | 1.61387 | 6  |
| -4 | 11  | -5 | 25.0013 | 1.66565 | 6  |
| -4 | 11  | -5 | 26.7180 | 2.03080 | 9  |
| -4 | 11  | -5 | 26.1217 | 1.86032 | 9  |
| -5 | -11 | -5 | 76.9195 | 7.64076 | 10 |
| -5 | -11 | -5 | 77.5030 | 7.95141 | 10 |
| -5 | -11 | -5 | 81.7804 | 10.3140 | 1  |
| 5  | 11  | 5  | 81.1979 | 8.66801 | 13 |
| -5 | 11  | -5 | 96.0139 | 5.46637 | 6  |
| -5 | 11  | -5 | 91.4330 | 5.44377 | 6  |
| -5 | 11  | -5 | 94.9433 | 5.58292 | 9  |
| -5 | 11  | -5 | 94.9194 | 7.67108 | 12 |
| -6 | -11 | -5 | 91.1282 | 7.58852 | 8  |
| -6 | -11 | -5 | 93.3773 | 8.09157 | 10 |
| -6 | 11  | -5 | 98.1661 | 6.08944 | 9  |
| -6 | 11  | -5 | 104.998 | 6.08519 | 9  |
| -6 | 11  | -5 | 104.799 | 8.13550 | 12 |
| -7 | -11 | -5 | 10.6004 | 2.25378 | 8  |
| -7 | -11 | -5 | 8.88388 | 2.29027 | 10 |
| 7  | 11  | 5  | 7.78956 | 3.37927 | 13 |
| -7 | 11  | -5 | 7.37190 | 2.84506 | 12 |
| 8  | 11  | 5  | 5.39068 | 2.55725 | 13 |
| -9 | -12 | 5  | 8.19747 | 2.49665 | 10 |
| -9 | 12  | 5  | 8.33364 | 1.09774 | 9  |
| -8 | -12 | 5  | -1.6110 | 2.61700 | 10 |
| -8 | 12  | 5  | -0.2298 | 1.22326 | 7  |
| -8 | 12  | 5  | -0.2774 | 0.70199 | 9  |
| -8 | 12  | 5  | 0.60047 | 0.75585 | 6  |
| -7 | -12 | 5  | 87.7060 | 10.5665 | 1  |
| -7 | -12 | 5  | 88.1322 | 8.33321 | 10 |
| -7 | 12  | 5  | 88.9579 | 6.91230 | 7  |
| -6 | -12 | 5  | 352.415 | 27.2785 | 1  |
| -6 | -12 | 5  | 342.492 | 23.7309 | 10 |
| -6 | 12  | 5  | 355.001 | 22.4017 | 7  |
| -5 | -12 | 5  | 22.7332 | 5.83359 | 1  |
| 5  | -12 | -5 | 16.0048 | 4.94697 | 2  |
| 5  | 12  | -5 | 25.7467 | 4.45834 | 10 |
| -5 | 12  | 5  | 21.9585 | 2.96369 | 7  |
| -5 | 12  | 5  | 17.8247 | 2.17874 | 11 |
| 4  | -12 | -5 | 10.0983 | 4.15030 | 2  |
| 3  | -12 | -5 | 5.27696 | 3.31878 | 2  |
| -3 | 12  | 5  | 6.82851 | 1.86729 | 4  |
| 2  | -12 | -5 | 17.1276 | 4.34828 | 2  |
| 1  | -12 | -5 | 120.160 | 10.0621 | 2  |

|    |     |    |         |         |    |
|----|-----|----|---------|---------|----|
| 1  | 12  | -5 | 86.3654 | 7.05368 | 4  |
| 0  | -12 | -5 | 234.216 | 17.0664 | 2  |
| 0  | 12  | -5 | 210.647 | 14.0804 | 4  |
| -1 | -12 | -5 | 263.280 | 19.7090 | 2  |
| -2 | -12 | -5 | 124.285 | 11.2959 | 1  |
| -2 | -12 | -5 | 129.420 | 11.0070 | 2  |
| -2 | 12  | -5 | 99.1228 | 6.95285 | 6  |
| -3 | -12 | -5 | 242.000 | 19.6105 | 1  |
| -3 | 12  | -5 | 252.271 | 15.5531 | 3  |
| -3 | 12  | -5 | 242.340 | 15.1470 | 6  |
| -3 | 12  | -5 | 253.250 | 15.2565 | 9  |
| -3 | 12  | -5 | 252.156 | 15.1616 | 6  |
| -4 | -12 | -5 | 173.743 | 12.9691 | 10 |
| -4 | -12 | -5 | 177.228 | 13.1878 | 10 |
| -4 | -12 | -5 | 182.156 | 15.7284 | 1  |
| -4 | 12  | -5 | 166.860 | 10.7162 | 6  |
| -4 | 12  | -5 | 175.593 | 10.8974 | 9  |
| 4  | 12  | 5  | 155.857 | 13.0865 | 13 |
| -4 | 12  | -5 | 185.198 | 10.7486 | 6  |
| -4 | 12  | -5 | 181.651 | 12.5944 | 12 |
| -4 | 12  | -5 | 183.810 | 10.8286 | 9  |
| -5 | -12 | -5 | 49.6178 | 7.66465 | 1  |
| -5 | -12 | -5 | 44.2832 | 5.50885 | 10 |
| -5 | -12 | -5 | 46.8760 | 5.88086 | 10 |
| -5 | 12  | -5 | 42.3948 | 5.33249 | 12 |
| -5 | 12  | -5 | 42.6343 | 2.83984 | 9  |
| 5  | 12  | 5  | 45.8269 | 7.38349 | 13 |
| -5 | 12  | -5 | 43.7697 | 2.89390 | 9  |
| -6 | -12 | -5 | 110.345 | 8.70623 | 10 |
| -6 | -12 | -5 | 98.4473 | 7.79907 | 8  |
| -6 | 12  | -5 | 124.925 | 8.74916 | 12 |
| 6  | 12  | 5  | 94.7691 | 9.49115 | 13 |
| -7 | -12 | -5 | 15.8217 | 3.15663 | 10 |
| -7 | -12 | -5 | 14.7100 | 2.21705 | 8  |
| -7 | 12  | -5 | 18.1336 | 2.90465 | 12 |
| 7  | 12  | 5  | 16.5812 | 4.05907 | 13 |
| -9 | -13 | 5  | 30.6152 | 3.83543 | 10 |
| -8 | 13  | 5  | 4.72721 | 0.89576 | 9  |
| -8 | 13  | 5  | 4.48782 | 0.67858 | 6  |
| -8 | 13  | 5  | 4.87388 | 1.95862 | 7  |
| -7 | -13 | 5  | -1.2044 | 2.68528 | 10 |
| -7 | 13  | 5  | 5.09734 | 1.08179 | 9  |
| -7 | 13  | 5  | 3.37814 | 2.00673 | 7  |
| -6 | -13 | 5  | 46.9377 | 8.52061 | 1  |
| -6 | 13  | 5  | 32.1607 | 3.93298 | 7  |
| -5 | -13 | 5  | 63.6759 | 10.5349 | 1  |
| -5 | -13 | 5  | 55.3106 | 6.23614 | 13 |
| -5 | 13  | 5  | 53.1471 | 3.91312 | 11 |
| 5  | 13  | -5 | 56.1282 | 7.05635 | 10 |
| -5 | 13  | 5  | 61.7166 | 5.45177 | 7  |

|    |     |    |         |         |    |
|----|-----|----|---------|---------|----|
| 4  | -13 | -5 | 40.5802 | 7.08427 | 2  |
| 3  | -13 | -5 | 7.62618 | 4.42194 | 2  |
| -3 | 13  | 5  | 9.26698 | 1.83638 | 4  |
| 2  | -13 | -5 | 12.1495 | 4.08293 | 2  |
| 1  | -13 | -5 | 226.920 | 17.7177 | 2  |
| 1  | 13  | -5 | 232.407 | 15.0768 | 4  |
| 0  | -13 | -5 | 88.1201 | 9.45820 | 2  |
| 0  | 13  | -5 | 76.4568 | 5.64152 | 4  |
| -1 | -13 | -5 | 13.3359 | 4.47885 | 2  |
| -2 | -13 | -5 | 95.0701 | 9.67783 | 2  |
| -2 | -13 | -5 | 94.3132 | 9.65292 | 1  |
| -2 | 13  | -5 | 71.8461 | 4.89410 | 6  |
| -2 | 13  | -5 | 72.6970 | 5.14188 | 9  |
| -3 | -13 | -5 | 290.776 | 20.1101 | 10 |
| -3 | -13 | -5 | 290.056 | 20.2682 | 10 |
| -3 | -13 | -5 | 302.472 | 22.6958 | 2  |
| -3 | -13 | -5 | 304.591 | 23.0739 | 1  |
| -3 | 13  | -5 | 284.688 | 17.9964 | 6  |
| -3 | 13  | -5 | 291.209 | 18.1069 | 9  |
| -3 | 13  | -5 | 286.629 | 17.9924 | 6  |
| -3 | 13  | -5 | 324.982 | 19.8344 | 12 |
| -4 | -13 | -5 | 69.4287 | 9.15385 | 1  |
| -4 | -13 | -5 | 64.2322 | 6.89588 | 10 |
| -4 | -13 | -5 | 65.5134 | 6.63951 | 10 |
| 4  | 13  | 5  | 62.4723 | 6.92736 | 13 |
| -4 | 13  | -5 | 63.8053 | 3.86557 | 6  |
| -4 | 13  | -5 | 60.7000 | 3.86975 | 6  |
| -4 | 13  | -5 | 56.1771 | 5.99853 | 14 |
| -4 | 13  | -5 | 62.9074 | 4.00505 | 9  |
| -4 | 13  | -5 | 62.0625 | 6.18237 | 12 |
| -4 | 13  | -5 | 59.4172 | 4.04444 | 9  |
| -5 | -13 | -5 | 191.557 | 13.9227 | 10 |
| -5 | -13 | -5 | 185.369 | 13.6976 | 10 |
| -5 | -13 | -5 | 199.189 | 16.3784 | 1  |
| 5  | 13  | 5  | 177.322 | 14.2890 | 13 |
| -5 | 13  | -5 | 188.187 | 13.3886 | 12 |
| -6 | -13 | -5 | 5.38674 | 2.57910 | 10 |
| 6  | 13  | 5  | 2.61507 | 3.79599 | 13 |
| -6 | 13  | -5 | 2.75959 | 2.54310 | 12 |
| -7 | -13 | -5 | 23.5480 | 3.33293 | 10 |
| -7 | -13 | -5 | 22.0824 | 2.64454 | 8  |
| -7 | 13  | -5 | 18.4756 | 2.83549 | 12 |
| 7  | 13  | 5  | 24.0405 | 3.80077 | 13 |
| -8 | -14 | 5  | 37.2745 | 4.90015 | 10 |
| -8 | 14  | 5  | 35.6546 | 3.74167 | 7  |
| -8 | 14  | 5  | 34.9738 | 2.43066 | 6  |
| -8 | 14  | 5  | 38.3456 | 2.64690 | 9  |
| -7 | -14 | 5  | 18.4139 | 3.48850 | 10 |
| -7 | 14  | 5  | 21.4484 | 2.96732 | 7  |
| -6 | -14 | 5  | 10.0186 | 5.17001 | 1  |



|    |     |    |         |         |    |
|----|-----|----|---------|---------|----|
| -6 | 14  | 5  | 18.4351 | 2.94172 | 7  |
| 6  | 14  | -5 | 12.7272 | 4.26181 | 10 |
| -5 | -14 | 5  | 58.0438 | 6.22784 | 13 |
| 5  | 14  | -5 | 56.7867 | 7.18873 | 10 |
| -5 | 14  | 5  | 66.2416 | 4.16648 | 11 |
| -5 | 14  | 5  | 63.8004 | 4.17439 | 11 |
| 4  | -14 | -5 | 71.9698 | 9.06588 | 2  |
| -4 | 14  | 5  | 65.1480 | 4.95454 | 11 |
| 4  | 14  | -5 | 72.1772 | 7.31673 | 10 |
| 3  | -14 | -5 | 2.94170 | 4.34359 | 2  |
| 2  | -14 | -5 | 60.1046 | 8.02702 | 2  |
| 1  | -14 | -5 | 65.3559 | 8.37577 | 2  |
| 1  | 14  | -5 | 63.8040 | 5.15511 | 4  |
| 0  | -14 | -5 | 147.088 | 12.7479 | 2  |
| 0  | 14  | -5 | 135.216 | 9.21231 | 4  |
| -1 | -14 | -5 | 24.6719 | 5.84577 | 2  |
| -1 | 14  | -5 | 33.3337 | 2.23373 | 6  |
| -2 | -14 | -5 | 43.1567 | 7.39123 | 2  |
| -2 | 14  | -5 | 59.8933 | 4.14519 | 9  |
| -2 | 14  | -5 | 68.2632 | 3.89098 | 6  |
| -3 | -14 | -5 | 0.86244 | 3.75155 | 1  |
| -3 | 14  | -5 | -2.5413 | 2.55645 | 12 |
| -3 | 14  | -5 | -1.0395 | 0.64762 | 9  |
| -3 | 14  | -5 | -0.4047 | 0.42894 | 6  |
| -3 | 14  | -5 | -0.1838 | 0.36384 | 6  |
| -3 | 14  | -5 | 2.49023 | 3.10184 | 14 |
| -4 | 14  | -5 | 27.7134 | 4.60991 | 12 |
| -4 | 14  | -5 | 25.6648 | 1.93735 | 9  |
| -4 | 14  | -5 | 27.2779 | 1.98266 | 9  |
| -4 | 14  | -5 | 24.9175 | 3.69633 | 14 |
| -4 | 14  | -5 | 28.1587 | 1.72785 | 6  |
| -4 | 14  | -5 | 25.7489 | 1.71136 | 6  |
| -5 | -14 | -5 | 8.40027 | 3.34749 | 10 |
| -5 | -14 | -5 | 4.54765 | 4.72813 | 1  |
| -5 | -14 | -5 | 12.1277 | 4.01528 | 10 |
| -5 | 14  | -5 | 9.20205 | 3.19503 | 12 |
| -6 | -14 | -5 | -0.4835 | 2.61915 | 10 |
| -6 | 14  | -5 | -4.9571 | 2.65166 | 12 |
| -7 | -14 | -5 | 4.99191 | 2.07728 | 10 |
| -7 | 14  | -5 | 3.89218 | 1.99715 | 12 |
| -8 | -15 | 5  | 7.82863 | 2.96722 | 10 |
| -8 | 15  | 5  | 15.4458 | 1.42144 | 9  |
| -8 | 15  | 5  | 14.9701 | 2.28976 | 7  |
| -8 | 15  | 5  | 15.2814 | 1.14882 | 6  |
| -7 | 15  | 5  | 18.1891 | 2.96028 | 7  |
| -7 | 15  | 5  | 15.7584 | 1.40506 | 6  |
| -7 | 15  | 5  | 16.6144 | 1.78723 | 9  |
| -6 | -15 | 5  | 57.4561 | 9.62430 | 1  |
| 6  | 15  | -5 | 67.8062 | 7.78830 | 10 |
| -5 | -15 | 5  | 133.733 | 10.3267 | 13 |

|    |     |    |         |         |    |
|----|-----|----|---------|---------|----|
| 5  | 15  | -5 | 138.667 | 11.4557 | 10 |
| -4 | -15 | 5  | -3.3015 | 2.34872 | 13 |
| 4  | -15 | -5 | -0.0428 | 3.50622 | 2  |
| 4  | 15  | -5 | -1.8561 | 3.23431 | 10 |
| -4 | 15  | 5  | -1.2547 | 1.11035 | 11 |
| 3  | -15 | -5 | 6.96680 | 4.02525 | 2  |
| 3  | 15  | -5 | 7.89574 | 3.00721 | 10 |
| 2  | -15 | -5 | 122.452 | 12.4844 | 2  |
| 1  | -15 | -5 | 219.012 | 17.8660 | 2  |
| 0  | -15 | -5 | 72.0235 | 8.84886 | 2  |
| -1 | -15 | -5 | 31.5502 | 6.26844 | 2  |
| -1 | 15  | -5 | 29.6414 | 2.21151 | 6  |
| -1 | 15  | -5 | 28.2087 | 2.68202 | 9  |
| -2 | -15 | -5 | 168.015 | 14.3954 | 2  |
| -2 | 15  | -5 | 150.297 | 12.0085 | 12 |
| -2 | 15  | -5 | 159.035 | 10.0849 | 9  |
| -2 | 15  | -5 | 161.215 | 9.86722 | 6  |
| 2  | 15  | 5  | 163.332 | 12.9024 | 10 |
| -3 | -15 | -5 | 106.961 | 12.1354 | 1  |
| -3 | 15  | -5 | 107.068 | 6.88988 | 6  |
| 3  | 15  | 5  | 99.1641 | 10.1332 | 10 |
| -3 | 15  | -5 | 114.795 | 8.88866 | 14 |
| -3 | 15  | -5 | 115.698 | 7.10077 | 9  |
| -3 | 15  | -5 | 115.905 | 6.89632 | 6  |
| -3 | 15  | -5 | 117.089 | 8.90791 | 12 |
| -4 | -15 | -5 | 106.851 | 9.10839 | 10 |
| -4 | -15 | -5 | 106.829 | 8.84880 | 10 |
| -4 | -15 | -5 | 116.084 | 11.9438 | 1  |
| -4 | 15  | -5 | 91.2887 | 6.04215 | 9  |
| -4 | 15  | -5 | 89.0574 | 6.06652 | 9  |
| -4 | 15  | -5 | 90.6962 | 8.19051 | 14 |
| -4 | 15  | -5 | 100.970 | 8.67588 | 12 |
| -5 | -15 | -5 | 0.27415 | 2.78211 | 10 |
| -5 | 15  | -5 | 0.50770 | 2.63921 | 12 |
| -6 | -15 | -5 | 24.4921 | 4.13418 | 10 |
| -6 | 15  | -5 | 27.1073 | 4.44065 | 12 |
| -7 | -15 | -5 | 4.92419 | 1.94237 | 10 |
| -8 | -16 | 5  | 8.68222 | 2.26103 | 10 |
| -8 | 16  | 5  | 10.9128 | 1.13632 | 9  |
| -7 | -16 | 5  | 38.0370 | 5.72200 | 10 |
| -7 | 16  | 5  | 47.1113 | 3.34841 | 9  |
| -7 | 16  | 5  | 53.0233 | 4.46261 | 7  |
| -7 | 16  | 5  | 47.3350 | 3.07739 | 6  |
| 7  | 16  | -5 | 41.6859 | 6.87814 | 10 |
| 6  | 16  | -5 | 68.9075 | 7.98099 | 10 |
| -6 | 16  | 5  | 62.5086 | 6.30535 | 7  |
| -6 | 16  | 5  | 67.2683 | 4.83117 | 9  |
| -5 | -16 | 5  | 72.2292 | 6.65845 | 13 |
| 5  | 16  | -5 | 78.8326 | 8.02974 | 10 |
| -4 | -16 | 5  | 16.5249 | 3.54185 | 13 |

|    |     |    |         |         |    |
|----|-----|----|---------|---------|----|
| 4  | 16  | -5 | 15.4357 | 3.85540 | 10 |
| -4 | 16  | 5  | 13.9732 | 1.80339 | 11 |
| 3  | -16 | -5 | 7.52959 | 4.18117 | 2  |
| -3 | -16 | 5  | 4.39590 | 2.39342 | 13 |
| -3 | 16  | 5  | 6.10591 | 1.87226 | 11 |
| 3  | 16  | -5 | 7.66875 | 2.98505 | 10 |
| 2  | -16 | -5 | 31.0419 | 6.42591 | 2  |
| 2  | 16  | -5 | 28.1904 | 4.67637 | 10 |
| 1  | -16 | -5 | 36.9537 | 7.18767 | 2  |
| -1 | 16  | 5  | 33.3056 | 5.39935 | 10 |
| 0  | -16 | -5 | 39.0658 | 7.07467 | 2  |
| 0  | 16  | 5  | 35.8371 | 5.34486 | 10 |
| -1 | -16 | -5 | 29.0784 | 6.43146 | 2  |
| 1  | 16  | 5  | 35.3379 | 5.76688 | 10 |
| -2 | -16 | -5 | 3.19686 | 2.69465 | 13 |
| -2 | 16  | -5 | 5.74964 | 2.65502 | 12 |
| -2 | 16  | -5 | 5.46510 | 0.67825 | 6  |
| -2 | 16  | -5 | 4.67977 | 1.07913 | 9  |
| -2 | 16  | -5 | 7.82078 | 2.84001 | 14 |
| 2  | 16  | 5  | 7.54212 | 3.73394 | 10 |
| -3 | 16  | -5 | 142.043 | 8.74087 | 9  |
| -3 | 16  | -5 | 141.051 | 10.4868 | 14 |
| -3 | 16  | -5 | 141.358 | 8.54657 | 6  |
| -3 | 16  | -5 | 132.795 | 10.6938 | 12 |
| 3  | 16  | 5  | 134.251 | 11.9081 | 10 |
| -4 | -16 | -5 | 5.47044 | 3.66916 | 10 |
| -4 | -16 | -5 | 4.73670 | 3.14947 | 10 |
| -4 | -16 | -5 | 3.46884 | 4.24757 | 1  |
| -4 | 16  | -5 | 3.21867 | 0.54409 | 9  |
| -4 | 16  | -5 | 4.01932 | 0.58006 | 9  |
| -4 | 16  | -5 | 3.92733 | 2.74309 | 14 |
| -4 | 16  | -5 | 2.29047 | 2.73636 | 12 |
| -5 | -16 | -5 | 91.5173 | 7.69900 | 10 |
| -5 | 16  | -5 | 69.1582 | 7.20278 | 12 |
| -6 | -16 | -5 | 23.2056 | 3.41407 | 10 |
| -6 | 16  | -5 | 23.2995 | 3.41928 | 12 |
| -8 | -17 | 5  | 24.4185 | 3.76676 | 10 |
| 7  | 17  | -5 | 36.1356 | 5.78174 | 10 |
| -7 | 17  | 5  | 27.8549 | 2.00189 | 6  |
| -7 | 17  | 5  | 26.9009 | 2.19930 | 9  |
| -5 | -17 | 5  | 2.69092 | 2.90989 | 13 |
| 5  | 17  | -5 | 5.23590 | 3.62275 | 10 |
| -4 | -17 | 5  | 27.0085 | 4.91333 | 13 |
| 4  | 17  | -5 | 33.3310 | 5.53784 | 10 |
| -4 | 17  | 5  | 28.4740 | 2.39313 | 11 |
| -4 | 17  | 5  | 28.9456 | 2.42102 | 11 |
| -3 | -17 | 5  | 54.8264 | 6.45086 | 13 |
| 3  | 17  | -5 | 54.0872 | 6.98101 | 10 |
| -3 | 17  | 5  | 71.5876 | 5.05680 | 11 |
| 2  | -17 | -5 | 17.1523 | 3.18671 | 13 |

|    |     |    |         |         |    |
|----|-----|----|---------|---------|----|
| -2 | -17 | 5  | 26.3334 | 4.02520 | 13 |
| 2  | -17 | -5 | 18.1372 | 5.46842 | 2  |
| -2 | 17  | 5  | 18.9500 | 3.57019 | 10 |
| 1  | -17 | -5 | 78.2248 | 8.40285 | 13 |
| 1  | -17 | -5 | 98.7763 | 10.6340 | 2  |
| 1  | 17  | -5 | 87.3398 | 7.11600 | 10 |
| -1 | 17  | 5  | 79.2737 | 7.46486 | 10 |
| 0  | -17 | -5 | 12.2632 | 2.73810 | 13 |
| 0  | 17  | 5  | 12.9547 | 3.47271 | 10 |
| 0  | 17  | -5 | 14.7537 | 1.99010 | 11 |
| 0  | 17  | -5 | 16.2672 | 3.57262 | 14 |
| -1 | -17 | -5 | 4.73848 | 2.37557 | 13 |
| -1 | 17  | -5 | 3.71871 | 1.36984 | 9  |
| 1  | 17  | 5  | 5.40639 | 3.33550 | 10 |
| -1 | 17  | -5 | 3.39397 | 2.65785 | 14 |
| -2 | -17 | -5 | 53.6435 | 5.78860 | 13 |
| -2 | 17  | -5 | 48.1666 | 5.31139 | 12 |
| -2 | 17  | -5 | 53.5522 | 3.47608 | 6  |
| 2  | 17  | 5  | 60.2838 | 7.19931 | 10 |
| -2 | 17  | -5 | 48.3672 | 5.85071 | 14 |
| -2 | 17  | -5 | 55.2719 | 3.91291 | 9  |
| -3 | -17 | -5 | 6.49969 | 4.75745 | 1  |
| -3 | 17  | -5 | 3.70368 | 0.93423 | 9  |
| -3 | 17  | -5 | 4.00652 | 3.33563 | 14 |
| -3 | 17  | -5 | 4.41467 | 2.61849 | 12 |
| -3 | 17  | -5 | 4.46785 | 0.53796 | 6  |
| 3  | 17  | 5  | 4.68398 | 3.72259 | 10 |
| -4 | -17 | -5 | 50.9554 | 6.41625 | 10 |
| -4 | -17 | -5 | 58.7730 | 10.7496 | 1  |
| -4 | 17  | -5 | 48.7394 | 5.93084 | 12 |
| 4  | 17  | 5  | 49.0144 | 7.29215 | 10 |
| -5 | -17 | -5 | 38.1763 | 4.67456 | 10 |
| -5 | 17  | -5 | 43.1161 | 5.23937 | 12 |
| -6 | -17 | -5 | 30.9858 | 3.58035 | 10 |
| -6 | 17  | -5 | 32.3223 | 4.22412 | 12 |
| -7 | 18  | 5  | 5.90826 | 0.63200 | 6  |
| -7 | 18  | 5  | 5.86700 | 0.89253 | 9  |
| 7  | 18  | -5 | 9.42571 | 3.66016 | 10 |
| 6  | 18  | -5 | 7.40105 | 3.94056 | 10 |
| -6 | 18  | 5  | 14.5635 | 1.64985 | 9  |
| -6 | 18  | 5  | 13.6246 | 1.24321 | 6  |
| -5 | -18 | 5  | 5.27614 | 2.77879 | 13 |
| 5  | 18  | -5 | 5.22297 | 3.84049 | 10 |
| -4 | -18 | 5  | 3.95316 | 3.07602 | 13 |
| 4  | 18  | -5 | 2.36766 | 3.21777 | 10 |
| -3 | -18 | 5  | 50.7195 | 5.62472 | 13 |
| 3  | 18  | -5 | 54.8274 | 6.20438 | 10 |
| 2  | -18 | -5 | 59.8765 | 5.93242 | 13 |
| -2 | -18 | 5  | 73.4430 | 6.84293 | 13 |
| 2  | 18  | -5 | 73.0201 | 6.71744 | 10 |

|    |     |    |         |         |    |
|----|-----|----|---------|---------|----|
| -2 | 18  | 5  | 53.4715 | 5.80879 | 10 |
| -1 | -18 | 5  | 11.1323 | 4.44611 | 13 |
| 1  | -18 | -5 | 0.63617 | 2.35878 | 13 |
| -1 | 18  | 5  | 4.47642 | 2.65114 | 10 |
| 0  | -18 | -5 | 34.3544 | 5.19957 | 13 |
| 0  | 18  | -5 | 29.4032 | 4.10908 | 14 |
| 0  | 18  | -5 | 32.9083 | 3.32274 | 11 |
| 0  | 18  | 5  | 27.4614 | 5.15659 | 10 |
| -1 | -18 | -5 | 35.9448 | 4.54341 | 13 |
| -1 | 18  | -5 | 32.6818 | 4.84172 | 14 |
| -1 | 18  | -5 | 28.3826 | 2.79140 | 9  |
| 1  | 18  | 5  | 34.6307 | 6.61479 | 10 |
| -2 | -18 | -5 | 31.7492 | 5.13893 | 13 |
| -2 | 18  | -5 | 40.1372 | 3.08664 | 9  |
| -2 | 18  | -5 | 39.3899 | 5.25796 | 14 |
| -2 | 18  | -5 | 40.1156 | 2.58504 | 6  |
| -2 | 18  | -5 | 36.4002 | 5.04198 | 12 |
| 2  | 18  | 5  | 32.2307 | 6.21193 | 10 |
| -3 | 18  | -5 | 11.5449 | 0.95449 | 6  |
| -3 | 18  | -5 | 11.3538 | 1.03912 | 6  |
| -3 | 18  | -5 | 10.6983 | 3.18762 | 14 |
| 3  | 18  | 5  | 9.63749 | 4.29451 | 10 |
| -3 | 18  | -5 | 10.4104 | 3.08799 | 12 |
| -3 | 18  | -5 | 13.1476 | 1.49953 | 9  |
| 4  | 18  | 5  | 10.7356 | 4.62311 | 10 |
| -4 | 18  | -5 | 21.6033 | 3.66686 | 12 |
| -5 | -18 | -5 | 2.82008 | 2.05793 | 10 |
| -5 | 18  | -5 | 7.98782 | 2.75561 | 12 |
| -6 | -18 | -5 | 1.69850 | 1.53566 | 10 |
| -7 | 19  | 5  | 15.9532 | 1.41414 | 9  |
| 7  | 19  | -5 | 14.9089 | 3.18174 | 10 |
| -6 | 19  | 5  | 5.69381 | 0.71536 | 6  |
| 6  | 19  | -5 | 4.21134 | 3.63006 | 10 |
| -6 | 19  | 5  | 7.58084 | 1.20468 | 9  |
| -5 | -19 | 5  | 18.0794 | 3.38131 | 13 |
| 5  | 19  | -5 | 19.4842 | 4.42418 | 10 |
| -4 | -19 | 5  | 2.30965 | 3.25817 | 13 |
| 4  | 19  | -5 | 3.93017 | 3.48474 | 10 |
| -3 | -19 | 5  | 27.1195 | 4.71197 | 13 |
| 3  | 19  | -5 | 32.2781 | 4.87882 | 10 |
| -3 | 19  | 5  | 19.5292 | 2.53371 | 11 |
| 2  | -19 | -5 | 58.9796 | 6.09529 | 13 |
| -2 | -19 | 5  | 51.6686 | 6.23844 | 13 |
| 2  | 19  | -5 | 55.6790 | 6.13464 | 10 |
| -2 | 19  | 5  | 56.4603 | 5.19282 | 10 |
| 1  | -19 | -5 | 4.95029 | 2.96014 | 13 |
| -1 | -19 | 5  | 10.8946 | 2.60592 | 13 |
| 1  | 19  | -5 | 5.32580 | 1.91274 | 11 |
| -1 | 19  | 5  | 8.34900 | 3.06640 | 10 |
| 0  | -19 | -5 | 81.4134 | 6.78909 | 13 |

|    |     |    |         |         |    |
|----|-----|----|---------|---------|----|
| 0  | 19  | -5 | 70.6265 | 5.26927 | 11 |
| 0  | 19  | 5  | 80.4762 | 7.47545 | 10 |
| 0  | 19  | -5 | 67.3387 | 5.16502 | 11 |
| -1 | -19 | -5 | 34.1787 | 5.33548 | 13 |
| -1 | 19  | -5 | 42.4834 | 3.74412 | 9  |
| -1 | 19  | -5 | 44.6305 | 5.24376 | 14 |
| 1  | 19  | 5  | 34.2945 | 5.93479 | 10 |
| -2 | -19 | -5 | 29.5265 | 4.54496 | 13 |
| -2 | 19  | -5 | 29.6119 | 2.13793 | 6  |
| -2 | 19  | -5 | 30.6639 | 2.78821 | 9  |
| 2  | 19  | 5  | 31.1191 | 6.02498 | 10 |
| -3 | 19  | -5 | 41.9596 | 2.73086 | 6  |
| 3  | 19  | 5  | 31.7491 | 5.85458 | 10 |
| -3 | 19  | -5 | 40.9623 | 2.75794 | 6  |
| -3 | 19  | -5 | 50.2395 | 3.14536 | 9  |
| -3 | 19  | -5 | 43.8396 | 5.24876 | 12 |
| 4  | 19  | 5  | -0.3777 | 3.63114 | 10 |
| -4 | 19  | -5 | 0.65705 | 2.62626 | 12 |
| -5 | -19 | -5 | 16.5331 | 3.09996 | 10 |
| 7  | 20  | -5 | 7.98433 | 2.42415 | 10 |
| -6 | 20  | 5  | 32.1741 | 2.33656 | 9  |
| -6 | 20  | 5  | 29.1391 | 2.04382 | 6  |
| 6  | 20  | -5 | 24.3678 | 4.26579 | 10 |
| -5 | -20 | 5  | 6.95844 | 2.95824 | 13 |
| 5  | 20  | -5 | 6.27690 | 3.38696 | 10 |
| -4 | -20 | 5  | 6.76348 | 2.71824 | 13 |
| 4  | 20  | -5 | 7.33207 | 3.26447 | 10 |
| 3  | -20 | -5 | 47.3547 | 5.55999 | 13 |
| -3 | -20 | 5  | 47.3983 | 5.70934 | 13 |
| -3 | 20  | 5  | 43.3160 | 3.48140 | 11 |
| 3  | 20  | -5 | 47.0521 | 5.80151 | 10 |
| -3 | 20  | 5  | 49.2946 | 3.55336 | 11 |
| -2 | -20 | 5  | 24.0598 | 3.97512 | 13 |
| 2  | -20 | -5 | 29.4334 | 4.97807 | 13 |
| -2 | 20  | 5  | 28.3125 | 3.76742 | 11 |
| 2  | 20  | -5 | 24.6972 | 4.14169 | 10 |
| -1 | -20 | 5  | 85.7253 | 6.84016 | 13 |
| 1  | -20 | -5 | 67.4870 | 6.62898 | 13 |
| -1 | 20  | 5  | 63.0425 | 6.52303 | 10 |
| 1  | 20  | -5 | 85.3244 | 5.86660 | 11 |
| 0  | -20 | -5 | 163.529 | 11.8176 | 13 |
| 0  | 20  | -5 | 159.633 | 9.83712 | 11 |
| 0  | 20  | 5  | 150.997 | 12.2579 | 10 |
| 0  | 20  | -5 | 156.555 | 9.83711 | 11 |
| -1 | -20 | -5 | 3.54543 | 2.49699 | 13 |
| -1 | 20  | -5 | 1.57352 | 1.42597 | 9  |
| 1  | 20  | 5  | 0.03249 | 2.93505 | 10 |
| -2 | -20 | -5 | 0.24783 | 3.04689 | 13 |
| 2  | 20  | 5  | 0.80673 | 3.60189 | 10 |
| -2 | 20  | -5 | -0.0388 | 0.48064 | 6  |

|    |     |    |         |         |    |
|----|-----|----|---------|---------|----|
| -2 | 20  | -5 | -1.5172 | 1.10660 | 9  |
| 3  | 20  | 5  | 62.2615 | 7.76927 | 10 |
| -3 | 20  | -5 | 65.0972 | 6.31948 | 12 |
| -3 | 20  | -5 | 70.5255 | 4.21271 | 6  |
| -3 | 20  | -5 | 69.1431 | 4.23462 | 6  |
| -3 | 20  | -5 | 63.7949 | 4.55831 | 9  |
| -3 | 20  | -5 | 71.2671 | 4.53255 | 9  |
| 4  | 20  | 5  | 5.84776 | 3.84226 | 10 |
| -5 | -20 | -5 | 1.84124 | 1.58184 | 10 |
| 5  | 20  | 5  | 1.34515 | 2.16736 | 10 |
| -6 | 21  | 5  | 11.1678 | 1.22573 | 9  |
| 6  | 21  | -5 | 14.1482 | 2.89563 | 10 |
| -5 | -21 | 5  | 25.3135 | 3.60891 | 13 |
| 5  | 21  | -5 | 17.0042 | 3.85379 | 10 |
| -4 | -21 | 5  | 84.5296 | 7.50104 | 13 |
| 4  | 21  | -5 | 92.2412 | 8.04815 | 10 |
| -3 | -21 | 5  | 59.1132 | 6.13590 | 13 |
| 3  | -21 | -5 | 49.4901 | 5.74554 | 13 |
| 3  | 21  | -5 | 60.3228 | 5.99276 | 10 |
| -3 | 21  | 5  | 54.5523 | 3.63098 | 11 |
| -3 | 21  | 5  | 55.4280 | 3.63934 | 11 |
| 2  | -21 | -5 | 69.5569 | 7.05832 | 13 |
| -2 | -21 | 5  | 92.5684 | 7.68900 | 13 |
| 2  | 21  | -5 | 88.6997 | 7.06165 | 10 |
| -2 | 21  | 5  | 81.9493 | 5.99862 | 11 |
| -1 | -21 | 5  | 144.301 | 12.0912 | 13 |
| 1  | -21 | -5 | 187.292 | 12.1120 | 13 |
| -1 | 21  | 5  | 179.987 | 12.1273 | 10 |
| 1  | 21  | -5 | 154.515 | 11.0397 | 11 |
| 0  | -21 | -5 | -2.7282 | 3.01506 | 13 |
| 0  | 21  | 5  | 4.71159 | 2.83638 | 10 |
| -1 | -21 | -5 | 24.6154 | 4.71948 | 13 |
| -1 | 21  | -5 | 25.1723 | 2.90095 | 9  |
| 1  | 21  | 5  | 28.5242 | 5.35200 | 10 |
| 2  | 21  | 5  | 94.2518 | 8.56190 | 10 |
| -2 | 21  | -5 | 101.447 | 6.61054 | 9  |
| -2 | 21  | -5 | 99.2688 | 6.19072 | 6  |
| -3 | 21  | -5 | 3.88273 | 0.86603 | 9  |
| 3  | 21  | 5  | 10.5314 | 3.11961 | 10 |
| -3 | 21  | -5 | 5.60761 | 0.82042 | 9  |
| 4  | 21  | 5  | 14.9892 | 3.32154 | 10 |
| 6  | 22  | -5 | 3.40079 | 2.54154 | 10 |
| 5  | 22  | -5 | 29.0308 | 4.01816 | 10 |
| -5 | 22  | 5  | 40.3927 | 2.78961 | 9  |
| -4 | -22 | 5  | 37.5635 | 5.46704 | 13 |
| 4  | 22  | -5 | 37.5220 | 5.04538 | 10 |
| 3  | -22 | -5 | 112.064 | 8.36376 | 13 |
| -3 | -22 | 5  | 113.237 | 8.84720 | 13 |
| 3  | 22  | -5 | 105.404 | 8.60637 | 10 |
| -2 | -22 | 5  | 71.2104 | 6.62809 | 13 |

|    |     |    |         |         |    |
|----|-----|----|---------|---------|----|
| -2 | 22  | 5  | 64.5235 | 4.82322 | 11 |
| 2  | 22  | -5 | 59.1441 | 5.48497 | 11 |
| 1  | -22 | -5 | 12.0801 | 2.85264 | 13 |
| -1 | -22 | 5  | 9.64813 | 3.00998 | 13 |
| -1 | 22  | 5  | 12.2643 | 2.71748 | 10 |
| 1  | 22  | -5 | 10.7317 | 1.69396 | 11 |
| 1  | 22  | -5 | 11.6475 | 1.73899 | 11 |
| 0  | -22 | -5 | 10.9476 | 2.93603 | 13 |
| 0  | 22  | 5  | 12.5864 | 3.10316 | 10 |
| -1 | -22 | -5 | 17.5866 | 3.66892 | 13 |
| 1  | 22  | 5  | 13.4028 | 3.49713 | 10 |
| -2 | -22 | -5 | 28.9368 | 4.11872 | 13 |
| -2 | 22  | -5 | 21.7923 | 2.25747 | 9  |
| -2 | 22  | -5 | 19.1174 | 1.60255 | 6  |
| 2  | 22  | 5  | 23.1731 | 4.04445 | 10 |
| -3 | 22  | -5 | 3.02838 | 0.58612 | 9  |
| -3 | 22  | -5 | 3.84971 | 0.55229 | 9  |
| 3  | 22  | 5  | 4.85667 | 2.45508 | 10 |
| 4  | 22  | 5  | 1.30186 | 2.05729 | 10 |
| 5  | 23  | -5 | 2.05037 | 2.20332 | 10 |
| -4 | -23 | 5  | 14.6431 | 2.79601 | 13 |
| 4  | 23  | -5 | 13.9392 | 2.90195 | 10 |
| -3 | -23 | 5  | 14.9970 | 3.03728 | 13 |
| 3  | -23 | -5 | 15.2124 | 3.06629 | 13 |
| 3  | 23  | -5 | 16.7263 | 3.01474 | 10 |
| 2  | -23 | -5 | 4.68119 | 2.12974 | 13 |
| -2 | -23 | 5  | 4.53958 | 2.41532 | 13 |
| -2 | 23  | 5  | 4.13046 | 0.95730 | 11 |
| 2  | 23  | -5 | 3.14076 | 1.60399 | 11 |
| -2 | 23  | 5  | 4.63515 | 0.91479 | 11 |
| 1  | -23 | -5 | 7.20133 | 2.47788 | 13 |
| -1 | -23 | 5  | 12.6600 | 3.07201 | 13 |
| -1 | 23  | 5  | 6.36246 | 1.63628 | 11 |
| 0  | -23 | -5 | 4.25372 | 2.44419 | 13 |
| 0  | 23  | 5  | 5.14264 | 2.22230 | 10 |
| -1 | -23 | -5 | 1.85842 | 2.57377 | 13 |
| -1 | 23  | -5 | 4.33189 | 1.37283 | 9  |
| 1  | 23  | 5  | 7.68480 | 2.97904 | 10 |
| -2 | -23 | -5 | 18.3632 | 2.78620 | 13 |
| -2 | 23  | -5 | 14.4245 | 1.24044 | 6  |
| 2  | 23  | 5  | 18.1010 | 3.61580 | 10 |
| -2 | 23  | -5 | 13.3716 | 1.81771 | 9  |
| 3  | 23  | 5  | 0.54110 | 2.71590 | 10 |
| 4  | 23  | 5  | 4.92439 | 2.64146 | 10 |
| -4 | -24 | 5  | 2.21760 | 2.21439 | 13 |
| 4  | 24  | -5 | 0.31420 | 1.60277 | 10 |
| -3 | -24 | 5  | 7.69794 | 2.36563 | 13 |
| 3  | -24 | -5 | 8.17845 | 2.46968 | 13 |
| 3  | 24  | -5 | 7.81324 | 1.78302 | 11 |
| -2 | -24 | 5  | -1.3567 | 2.47385 | 13 |



|    |     |    |         |         |    |
|----|-----|----|---------|---------|----|
| 2  | -24 | -5 | 1.08128 | 1.94425 | 13 |
| 2  | 24  | -5 | 1.28260 | 1.25565 | 11 |
| 2  | 24  | -5 | -0.6919 | 1.17203 | 11 |
| -1 | -24 | 5  | 21.7501 | 3.86741 | 13 |
| 1  | -24 | -5 | 24.2891 | 3.93387 | 13 |
| -1 | 24  | 5  | 22.2981 | 2.30943 | 11 |
| 0  | -24 | -5 | 19.4017 | 3.04293 | 13 |
| 0  | 24  | 5  | 19.1915 | 3.26784 | 10 |
| -1 | -24 | -5 | -1.4243 | 1.96521 | 13 |
| 1  | 24  | 5  | -0.4662 | 2.10892 | 10 |
| -1 | 24  | -5 | 1.84230 | 0.51351 | 6  |
| -1 | 24  | -5 | 0.06651 | 1.00842 | 9  |
| -2 | -24 | -5 | 30.5144 | 3.89634 | 13 |
| -2 | 24  | -5 | 31.0959 | 2.35461 | 9  |
| -2 | 24  | -5 | 29.0634 | 1.95380 | 6  |
| 3  | 24  | 5  | 7.09691 | 2.57543 | 10 |
| -4 | -25 | 5  | 3.75530 | 1.55511 | 13 |
| 3  | -25 | -5 | 9.83412 | 1.94934 | 13 |
| -3 | -25 | 5  | 9.92290 | 2.20501 | 13 |
| 3  | 25  | -5 | 8.93650 | 1.34730 | 11 |
| 2  | -25 | -5 | 0.03163 | 1.70894 | 13 |
| -2 | -25 | 5  | -0.6344 | 1.79476 | 13 |
| -1 | -25 | 5  | 21.5649 | 3.28554 | 13 |
| 1  | -25 | -5 | 15.3444 | 2.55518 | 13 |
| -1 | 25  | 5  | 16.5320 | 1.65874 | 11 |
| -1 | 25  | 5  | 15.6279 | 1.52145 | 11 |
| 0  | -25 | -5 | 3.02636 | 2.39498 | 13 |
| 0  | 25  | 5  | 2.87145 | 1.20029 | 11 |
| -1 | -25 | -5 | 5.69088 | 2.33334 | 13 |
| -1 | 25  | -5 | 6.17643 | 1.12547 | 9  |
| 1  | 25  | 5  | 5.37670 | 1.77867 | 10 |
| 2  | 25  | 5  | 2.00155 | 2.22541 | 10 |
| 3  | -26 | -5 | 7.72338 | 1.89105 | 13 |
| -3 | -26 | 5  | 4.42998 | 1.72174 | 13 |
| 2  | -26 | -5 | 13.6593 | 2.33029 | 13 |
| -2 | -26 | 5  | 11.0855 | 2.12865 | 13 |
| -1 | -26 | 5  | 2.40090 | 1.61496 | 13 |
| 1  | -26 | -5 | 5.10886 | 1.81678 | 13 |
| 0  | -26 | 5  | 5.67084 | 1.65026 | 13 |
| 0  | -26 | -5 | 7.90623 | 1.92249 | 13 |
| 0  | 26  | 5  | 10.6015 | 1.42451 | 11 |
| 0  | 26  | 5  | 7.01677 | 0.99456 | 11 |
| -1 | -26 | -5 | 1.12441 | 1.76436 | 13 |
| 10 | 0   | -6 | 2.01066 | 2.70437 | 13 |
| 9  | 0   | -6 | 1.24300 | 3.08971 | 13 |
| -9 | 0   | 6  | 2.76782 | 1.39449 | 11 |
| 9  | 0   | -6 | 1.72834 | 3.33551 | 13 |
| 8  | 0   | -6 | 0.17038 | 3.17341 | 13 |
| -8 | 0   | 6  | 0.36229 | 1.87342 | 10 |
| -7 | 0   | 6  | -0.9972 | 2.35278 | 10 |

|    |    |    |         |         |    |
|----|----|----|---------|---------|----|
| 7  | 0  | -6 | 1.58285 | 3.48223 | 13 |
| -6 | 0  | 6  | 230.483 | 17.2324 | 1  |
| -5 | 0  | 6  | 97.5784 | 8.98429 | 1  |
| -5 | 0  | 6  | 91.1764 | 7.92747 | 5  |
| -4 | 0  | 6  | 5.39159 | 3.03366 | 5  |
| -4 | 0  | 6  | 8.16853 | 3.34991 | 1  |
| -3 | 0  | 6  | 110.857 | 10.0886 | 5  |
| -3 | 0  | 6  | 102.884 | 9.20320 | 1  |
| -2 | 0  | 6  | 32.0432 | 5.53021 | 5  |
| 0  | 0  | -6 | 3804.48 | 231.486 | 5  |
| -1 | 0  | -6 | 747.683 | 46.9868 | 5  |
| -1 | 0  | -6 | 756.126 | 47.1355 | 4  |
| -1 | 0  | -6 | 780.132 | 47.8049 | 5  |
| -2 | 0  | -6 | 140.319 | 9.79604 | 4  |
| -2 | 0  | -6 | 140.352 | 10.3537 | 1  |
| -3 | 0  | -6 | 2.23532 | 1.67265 | 1  |
| -3 | 0  | -6 | 2.57670 | 1.50001 | 4  |
| -4 | 0  | -6 | 19.6521 | 2.95229 | 4  |
| -4 | 0  | -6 | 22.9803 | 2.74055 | 8  |
| -5 | 0  | -6 | 7.78783 | 1.82941 | 8  |
| -6 | 0  | -6 | 66.2642 | 5.19302 | 8  |
| -7 | 0  | -6 | 2.91428 | 1.25255 | 8  |
| 8  | 0  | 6  | 6.09619 | 2.53147 | 13 |
| 10 | -1 | -6 | 1.79689 | 3.22976 | 13 |
| 10 | 1  | -6 | 2.03136 | 2.74712 | 13 |
| -9 | -1 | 6  | 6.50058 | 1.43764 | 11 |
| 9  | -1 | -6 | 5.65368 | 3.36236 | 13 |
| -9 | -1 | 6  | 6.34960 | 2.00095 | 10 |
| 9  | 1  | -6 | 6.14205 | 3.66903 | 13 |
| -9 | 1  | 6  | 6.63107 | 1.36048 | 11 |
| 9  | 1  | -6 | 4.49199 | 3.31184 | 13 |
| 8  | -1 | -6 | 60.0784 | 7.35877 | 13 |
| -8 | -1 | 6  | 74.4999 | 6.31363 | 10 |
| -8 | 1  | 6  | 66.2325 | 6.11794 | 10 |
| 8  | 1  | -6 | 75.1786 | 7.92745 | 13 |
| 7  | -1 | -6 | 2.01369 | 2.99608 | 13 |
| -7 | -1 | 6  | 16.1421 | 3.26730 | 10 |
| -7 | -1 | 6  | 11.7424 | 3.70855 | 1  |
| -7 | 1  | 6  | 7.26276 | 2.33678 | 10 |
| 7  | 1  | -6 | 11.9318 | 3.51485 | 13 |
| -6 | -1 | 6  | 1.10964 | 3.33553 | 1  |
| -5 | -1 | 6  | 124.592 | 9.82534 | 5  |
| -5 | -1 | 6  | 121.290 | 10.4295 | 1  |
| -5 | 1  | 6  | 101.411 | 9.45496 | 1  |
| -5 | 1  | 6  | 96.2207 | 7.70971 | 5  |
| -4 | -1 | 6  | 366.035 | 24.0647 | 5  |
| -4 | -1 | 6  | 358.624 | 23.4724 | 1  |
| -4 | 1  | 6  | 309.609 | 23.0838 | 1  |
| -4 | 1  | 6  | 313.552 | 22.9640 | 5  |
| -3 | -1 | 6  | 258.277 | 19.0198 | 5  |

|    |    |    |         |         |    |
|----|----|----|---------|---------|----|
| -3 | -1 | 6  | 242.602 | 18.1306 | 1  |
| -3 | 1  | 6  | 260.989 | 18.7870 | 5  |
| -3 | 1  | 6  | 265.771 | 18.2614 | 1  |
| 2  | -1 | -6 | 2.41526 | 1.63432 | 2  |
| -2 | 1  | 6  | 4.25585 | 2.79359 | 5  |
| 0  | -1 | -6 | 627.394 | 42.2490 | 5  |
| 0  | 1  | -6 | 683.273 | 41.9978 | 5  |
| 0  | 1  | -6 | 702.556 | 41.6682 | 4  |
| -1 | -1 | -6 | 6577.12 | 396.995 | 5  |
| -1 | 1  | -6 | 6461.19 | 394.845 | 4  |
| -2 | -1 | -6 | 1027.65 | 66.0548 | 1  |
| -2 | -1 | -6 | 1031.19 | 65.3810 | 4  |
| -2 | 1  | -6 | 1137.78 | 65.2627 | 4  |
| -2 | 1  | -6 | 1048.28 | 65.5729 | 1  |
| -3 | -1 | -6 | 13.4220 | 2.78221 | 1  |
| -3 | -1 | -6 | 13.0400 | 2.39642 | 4  |
| -3 | 1  | -6 | 14.4392 | 2.15194 | 4  |
| -4 | -1 | -6 | 172.096 | 12.1224 | 4  |
| -4 | -1 | -6 | 172.858 | 11.5177 | 8  |
| -4 | 1  | -6 | 181.873 | 11.4687 | 8  |
| -5 | 1  | -6 | 17.2728 | 2.60115 | 8  |
| -6 | -1 | -6 | 154.023 | 10.6348 | 8  |
| -6 | 1  | -6 | 163.726 | 10.4856 | 8  |
| -7 | -1 | -6 | 13.7477 | 2.35215 | 8  |
| -7 | 1  | -6 | 18.8938 | 2.10970 | 8  |
| 7  | 1  | 6  | 14.5653 | 3.69466 | 13 |
| 8  | 1  | 6  | 10.1189 | 3.20839 | 13 |
| 10 | -2 | -6 | 3.39674 | 2.65728 | 13 |
| 10 | 2  | -6 | 5.02783 | 2.78934 | 13 |
| 9  | -2 | -6 | 0.39186 | 3.09895 | 13 |
| -9 | -2 | 6  | 3.14509 | 1.74432 | 10 |
| 9  | 2  | -6 | 4.19393 | 3.44400 | 13 |
| -9 | 2  | 6  | 2.88920 | 1.02323 | 11 |
| 8  | -2 | -6 | 165.255 | 12.0331 | 13 |
| -8 | -2 | 6  | 142.979 | 11.3325 | 10 |
| 8  | 2  | -6 | 150.208 | 12.4556 | 13 |
| -8 | 2  | 6  | 167.000 | 10.9967 | 10 |
| 7  | -2 | -6 | 80.8027 | 7.83288 | 13 |
| -7 | -2 | 6  | 81.1647 | 8.69988 | 1  |
| -7 | -2 | 6  | 77.9531 | 7.10015 | 10 |
| 7  | 2  | -6 | 68.3938 | 7.94519 | 13 |
| -7 | 2  | 6  | 89.4903 | 6.85877 | 10 |
| -6 | -2 | 6  | 7.24713 | 3.91105 | 1  |
| -5 | -2 | 6  | 566.338 | 36.8149 | 1  |
| -5 | 2  | 6  | 535.523 | 36.0295 | 1  |
| -4 | -2 | 6  | 278.557 | 21.4157 | 5  |
| -4 | -2 | 6  | 276.786 | 20.8131 | 1  |
| -4 | 2  | 6  | 310.304 | 20.1745 | 5  |
| -4 | 2  | 6  | 305.844 | 20.4814 | 1  |
| 3  | -2 | -6 | 813.177 | 49.5979 | 2  |

|    |    |    |         |         |    |
|----|----|----|---------|---------|----|
| -3 | -2 | 6  | 711.014 | 50.1375 | 1  |
| -3 | -2 | 6  | 737.788 | 51.0184 | 5  |
| -3 | 2  | 6  | 808.429 | 50.1032 | 1  |
| -3 | 2  | 6  | 859.736 | 50.6088 | 5  |
| 2  | -2 | -6 | 32.7030 | 4.03750 | 2  |
| -2 | 2  | 6  | 36.1720 | 5.33942 | 5  |
| 1  | -2 | -6 | 46.9315 | 5.49566 | 5  |
| 1  | -2 | -6 | 34.3518 | 4.05198 | 2  |
| 0  | -2 | -6 | 106.798 | 8.02742 | 5  |
| 0  | 2  | -6 | 83.0590 | 6.64952 | 4  |
| 0  | 2  | -6 | 86.0383 | 6.79936 | 5  |
| -1 | 2  | -6 | 4.83993 | 1.39534 | 3  |
| -1 | 2  | -6 | 7.92685 | 1.64044 | 4  |
| -2 | -2 | -6 | 114.145 | 7.84164 | 5  |
| -2 | -2 | -6 | 113.708 | 9.29129 | 1  |
| -2 | 2  | -6 | 117.911 | 7.98022 | 4  |
| -2 | 2  | -6 | 110.819 | 8.17105 | 1  |
| -3 | 2  | -6 | 26.5590 | 2.71975 | 4  |
| -4 | -2 | -6 | 10.3530 | 2.13279 | 4  |
| -4 | -2 | -6 | 10.9187 | 1.80385 | 8  |
| -4 | 2  | -6 | 14.9915 | 1.90026 | 8  |
| -4 | 2  | -6 | 9.77361 | 1.40606 | 4  |
| -5 | -2 | -6 | 271.813 | 17.4333 | 10 |
| -5 | -2 | -6 | 274.127 | 17.0651 | 8  |
| 5  | 2  | 6  | 312.279 | 18.8813 | 13 |
| -5 | 2  | -6 | 227.294 | 17.4902 | 12 |
| -5 | 2  | -6 | 246.696 | 16.7650 | 8  |
| -6 | -2 | -6 | 3.45801 | 1.54470 | 8  |
| -6 | 2  | -6 | 1.27119 | 1.18687 | 8  |
| 6  | 2  | 6  | 4.24598 | 3.86580 | 13 |
| -7 | -2 | -6 | 28.7134 | 2.87201 | 8  |
| 7  | 2  | 6  | 26.0054 | 4.32912 | 13 |
| -8 | 2  | -6 | 16.4643 | 1.89165 | 9  |
| 8  | 2  | 6  | 19.2401 | 3.70604 | 13 |
| 10 | -3 | -6 | 2.44044 | 2.55226 | 13 |
| 10 | 3  | -6 | 2.12096 | 2.62354 | 13 |
| -9 | -3 | 6  | 3.19880 | 1.91115 | 10 |
| -9 | 3  | 6  | 3.92158 | 1.48169 | 7  |
| 9  | 3  | -6 | 2.28272 | 3.35956 | 13 |
| -9 | 3  | 6  | 4.36735 | 0.92908 | 11 |
| 8  | -3 | -6 | 71.3144 | 7.39189 | 13 |
| -8 | -3 | 6  | 54.2435 | 5.82134 | 10 |
| 8  | 3  | -6 | 53.9349 | 7.40066 | 13 |
| -8 | 3  | 6  | 59.3772 | 4.46665 | 11 |
| 7  | -3 | -6 | 22.8367 | 3.73356 | 13 |
| -7 | -3 | 6  | 11.3715 | 3.06081 | 10 |
| -7 | -3 | 6  | 17.4842 | 4.84729 | 1  |
| 7  | 3  | -6 | 13.4934 | 4.46063 | 13 |
| -7 | 3  | 6  | 19.8325 | 3.25014 | 10 |
| -6 | -3 | 6  | 40.9782 | 6.96402 | 1  |

|    |    |    |         |         |    |
|----|----|----|---------|---------|----|
| -5 | -3 | 6  | 126.778 | 11.4752 | 1  |
| -5 | -3 | 6  | 109.418 | 10.5277 | 5  |
| -4 | -3 | 6  | 84.5813 | 8.71857 | 1  |
| -4 | -3 | 6  | 84.9131 | 9.12704 | 5  |
| -4 | 3  | 6  | 94.1614 | 7.29327 | 5  |
| -3 | -3 | 6  | 368.598 | 23.5265 | 1  |
| 3  | -3 | -6 | 314.516 | 22.3129 | 2  |
| -3 | 3  | 6  | 320.618 | 22.6962 | 5  |
| 2  | -3 | -6 | 50.7138 | 5.22813 | 2  |
| -2 | 3  | 6  | 50.2117 | 6.37389 | 5  |
| 1  | -3 | -6 | 212.661 | 15.1879 | 2  |
| 1  | -3 | -6 | 227.708 | 16.7082 | 5  |
| -1 | 3  | 6  | 234.822 | 17.0050 | 5  |
| 0  | 3  | -6 | 38.5236 | 3.39107 | 5  |
| 0  | 3  | -6 | 42.6704 | 3.60751 | 5  |
| 0  | 3  | -6 | 34.0516 | 3.61795 | 4  |
| -1 | -3 | -6 | 1753.15 | 120.424 | 2  |
| -1 | -3 | -6 | 1795.88 | 120.558 | 5  |
| -1 | 3  | -6 | 2162.99 | 119.813 | 4  |
| -1 | 3  | -6 | 2156.14 | 119.871 | 3  |
| -2 | -3 | -6 | 301.277 | 19.6123 | 1  |
| -2 | -3 | -6 | 294.348 | 18.6089 | 5  |
| -2 | 3  | -6 | 265.580 | 17.9666 | 3  |
| -2 | 3  | -6 | 259.286 | 17.7822 | 4  |
| -3 | -3 | -6 | 49.4651 | 5.75779 | 1  |
| -3 | 3  | -6 | 53.3229 | 4.43977 | 3  |
| -3 | 3  | -6 | 56.3307 | 4.10179 | 4  |
| -3 | 3  | -6 | 52.4608 | 3.88903 | 4  |
| -4 | -3 | -6 | 2.00228 | 1.31809 | 8  |
| -4 | -3 | -6 | 1.00451 | 1.84226 | 1  |
| -4 | 3  | -6 | 1.94520 | 1.15966 | 8  |
| -4 | 3  | -6 | 3.76535 | 1.50297 | 3  |
| -5 | -3 | -6 | 6.48295 | 2.39756 | 10 |
| -5 | -3 | -6 | 0.18370 | 1.78562 | 8  |
| -5 | 3  | -6 | 8.54732 | 2.95894 | 12 |
| -5 | 3  | -6 | 4.41953 | 1.34088 | 8  |
| 5  | 3  | 6  | 9.27417 | 4.25332 | 13 |
| -5 | 3  | -6 | 4.24848 | 0.75347 | 11 |
| -6 | -3 | -6 | 22.0755 | 3.43105 | 8  |
| 6  | 3  | 6  | 18.0786 | 4.15837 | 13 |
| -6 | 3  | -6 | 28.5105 | 2.56314 | 8  |
| -7 | -3 | -6 | 45.1971 | 4.00191 | 8  |
| 7  | 3  | 6  | 36.5150 | 6.23991 | 13 |
| -8 | 3  | -6 | 0.03733 | 0.69267 | 9  |
| 8  | 3  | 6  | 0.63337 | 2.49941 | 13 |
| 10 | -4 | -6 | 2.71229 | 2.41438 | 13 |
| 10 | 4  | -6 | 7.52764 | 2.83012 | 13 |
| 9  | -4 | -6 | 4.31090 | 3.22643 | 13 |
| -9 | -4 | 6  | 3.17226 | 2.17692 | 10 |
| -9 | 4  | 6  | 2.31464 | 1.84949 | 7  |

|    |    |    |         |         |    |
|----|----|----|---------|---------|----|
| 9  | 4  | -6 | -1.1312 | 4.18669 | 13 |
| -8 | -4 | 6  | 7.42266 | 3.18569 | 10 |
| 8  | 4  | -6 | 7.45096 | 3.70265 | 13 |
| 8  | 4  | -6 | 4.96339 | 3.36786 | 13 |
| 7  | -4 | -6 | 40.3764 | 5.73178 | 13 |
| -7 | -4 | 6  | 66.6896 | 7.71807 | 1  |
| -7 | -4 | 6  | 67.7883 | 6.51532 | 10 |
| -7 | 4  | 6  | 44.7779 | 5.06632 | 10 |
| 7  | 4  | -6 | 68.8043 | 7.81396 | 13 |
| -6 | -4 | 6  | 25.3614 | 5.69111 | 1  |
| -5 | -4 | 6  | 24.5989 | 5.63895 | 1  |
| -5 | -4 | 6  | 30.1594 | 6.11608 | 5  |
| 4  | -4 | -6 | 83.6654 | 7.71279 | 2  |
| -4 | 4  | 6  | 74.0946 | 5.70715 | 5  |
| 3  | -4 | -6 | 443.864 | 28.3706 | 2  |
| -3 | -4 | 6  | 403.067 | 28.9685 | 1  |
| -3 | 4  | 6  | 437.809 | 28.1828 | 5  |
| 2  | -4 | -6 | 663.085 | 41.5343 | 2  |
| -2 | 4  | 6  | 644.296 | 42.0564 | 5  |
| 1  | -4 | -6 | 358.427 | 24.0613 | 2  |
| -1 | 4  | 6  | 380.508 | 25.3890 | 5  |
| 0  | -4 | -6 | 46.2583 | 5.15316 | 5  |
| 0  | -4 | -6 | 45.1941 | 4.77945 | 2  |
| 0  | 4  | -6 | 43.4677 | 3.88200 | 4  |
| 0  | 4  | -6 | 41.8678 | 3.67151 | 3  |
| -1 | -4 | -6 | 2024.64 | 121.061 | 5  |
| -1 | -4 | -6 | 2015.37 | 120.884 | 2  |
| -1 | 4  | -6 | 1899.20 | 119.615 | 4  |
| -1 | 4  | -6 | 1928.10 | 119.739 | 3  |
| -2 | -4 | -6 | 92.1578 | 7.78957 | 5  |
| -2 | -4 | -6 | 90.7769 | 8.17403 | 2  |
| -2 | -4 | -6 | 86.5153 | 8.52050 | 1  |
| -2 | 4  | -6 | 98.3048 | 6.81466 | 3  |
| -2 | 4  | -6 | 103.487 | 6.56080 | 4  |
| -3 | -4 | -6 | 234.790 | 17.7368 | 1  |
| -3 | -4 | -6 | 250.535 | 18.1621 | 2  |
| -3 | 4  | -6 | 253.729 | 15.6186 | 4  |
| -3 | 4  | -6 | 254.808 | 15.5761 | 4  |
| -3 | 4  | -6 | 257.930 | 16.3491 | 3  |
| -4 | -4 | -6 | 52.1199 | 4.68094 | 8  |
| -4 | -4 | -6 | 52.4265 | 6.16586 | 1  |
| -4 | 4  | -6 | 64.2115 | 4.35062 | 8  |
| -4 | 4  | -6 | 60.7669 | 4.97072 | 3  |
| -4 | 4  | -6 | 62.7265 | 4.09816 | 9  |
| -5 | -4 | -6 | 170.420 | 11.4758 | 8  |
| -5 | -4 | -6 | 166.901 | 11.8967 | 10 |
| -5 | 4  | -6 | 173.596 | 10.9794 | 8  |
| -5 | 4  | -6 | 170.793 | 12.0172 | 12 |
| -5 | 4  | -6 | 181.097 | 10.9134 | 9  |
| 5  | 4  | 6  | 162.930 | 13.5347 | 13 |

|    |    |    |         |         |    |
|----|----|----|---------|---------|----|
| -6 | -4 | -6 | 339.896 | 21.3230 | 8  |
| -6 | -4 | -6 | 332.309 | 21.4651 | 10 |
| -6 | 4  | -6 | 318.265 | 20.6651 | 9  |
| 6  | 4  | 6  | 348.212 | 22.9893 | 13 |
| -7 | -4 | -6 | 152.580 | 10.1835 | 8  |
| 7  | 4  | 6  | 144.929 | 12.5360 | 13 |
| -7 | 4  | -6 | 157.062 | 9.72369 | 9  |
| -7 | 4  | -6 | 151.984 | 9.44605 | 6  |
| -8 | 4  | -6 | 0.35413 | 0.60766 | 9  |
| 8  | 4  | 6  | 1.89521 | 2.51402 | 13 |
| 10 | -5 | -6 | 4.82212 | 2.40117 | 13 |
| 10 | 5  | -6 | 6.51002 | 2.68005 | 13 |
| -9 | -5 | 6  | 9.34262 | 2.78337 | 10 |
| -9 | 5  | 6  | 12.6162 | 2.07779 | 7  |
| 9  | 5  | -6 | 23.0399 | 4.37435 | 13 |
| -8 | -5 | 6  | 59.1788 | 6.26453 | 10 |
| -8 | -5 | 6  | 57.2602 | 6.93880 | 1  |
| 8  | -5 | -6 | 60.5961 | 6.72567 | 13 |
| 8  | 5  | -6 | 62.9134 | 8.78374 | 13 |
| -8 | 5  | 6  | 53.9799 | 4.17717 | 11 |
| -7 | -5 | 6  | 17.7370 | 4.75053 | 1  |
| -7 | -5 | 6  | 20.9871 | 4.15148 | 10 |
| 7  | 5  | -6 | 23.0418 | 4.78323 | 13 |
| -6 | -5 | 6  | 97.9748 | 8.65758 | 10 |
| -6 | -5 | 6  | 104.463 | 11.1930 | 1  |
| -5 | -5 | 6  | 75.6302 | 9.31051 | 1  |
| -5 | -5 | 6  | 74.8917 | 8.87936 | 5  |
| 5  | -5 | -6 | 73.6208 | 8.21546 | 2  |
| -4 | -5 | 6  | 681.211 | 45.8907 | 1  |
| 4  | -5 | -6 | 718.265 | 45.4012 | 2  |
| 3  | -5 | -6 | 302.211 | 21.1843 | 2  |
| -3 | -5 | 6  | 322.277 | 22.0960 | 1  |
| -3 | 5  | 6  | 302.085 | 20.5597 | 5  |
| 2  | -5 | -6 | 494.768 | 32.3346 | 2  |
| -2 | 5  | 6  | 500.948 | 32.5921 | 5  |
| 1  | -5 | -6 | 352.115 | 22.9190 | 2  |
| 1  | 5  | -6 | 347.564 | 22.2763 | 5  |
| 1  | 5  | -6 | 328.065 | 21.9702 | 4  |
| -1 | 5  | 6  | 354.525 | 23.9505 | 5  |
| 0  | -5 | -6 | 499.734 | 33.7448 | 2  |
| 0  | -5 | -6 | 481.803 | 34.1264 | 5  |
| 0  | 5  | -6 | 558.430 | 32.7769 | 3  |
| 0  | 5  | -6 | 562.433 | 32.7240 | 4  |
| -1 | -5 | -6 | 86.1371 | 7.14482 | 2  |
| -1 | -5 | -6 | 82.7473 | 7.49823 | 5  |
| -1 | -5 | -6 | 82.8524 | 7.88606 | 1  |
| -1 | 5  | -6 | 68.0785 | 5.48967 | 4  |
| -1 | 5  | -6 | 74.2817 | 5.69839 | 3  |
| -2 | -5 | -6 | 20.4756 | 4.31405 | 1  |
| -2 | -5 | -6 | 21.4160 | 3.89092 | 2  |

|    |    |    |         |         |    |
|----|----|----|---------|---------|----|
| -2 | -5 | -6 | 23.0299 | 3.98854 | 5  |
| -2 | 5  | -6 | 33.5472 | 2.44566 | 4  |
| -2 | 5  | -6 | 26.6020 | 2.38418 | 4  |
| -2 | 5  | -6 | 30.0143 | 2.82765 | 3  |
| -3 | -5 | -6 | 103.450 | 9.47983 | 1  |
| -3 | -5 | -6 | 105.613 | 7.70336 | 5  |
| -3 | -5 | -6 | 102.373 | 9.47173 | 2  |
| -3 | 5  | -6 | 105.375 | 7.46620 | 3  |
| -4 | -5 | -6 | 18.8030 | 2.54139 | 8  |
| -4 | 5  | -6 | 10.9112 | 1.95727 | 3  |
| -4 | 5  | -6 | 10.2748 | 1.38815 | 9  |
| -4 | 5  | -6 | 11.1559 | 1.64026 | 8  |
| -4 | 5  | -6 | 10.9639 | 1.17286 | 6  |
| -5 | -5 | -6 | 13.0700 | 2.22112 | 8  |
| -5 | -5 | -6 | 14.0645 | 2.73819 | 10 |
| 5  | 5  | 6  | 11.0930 | 3.86923 | 13 |
| -5 | 5  | -6 | 7.46906 | 1.04932 | 6  |
| -5 | 5  | -6 | 6.13135 | 2.52388 | 12 |
| -5 | 5  | -6 | 9.07943 | 1.36602 | 9  |
| -6 | -5 | -6 | 29.8159 | 3.39786 | 8  |
| -6 | -5 | -6 | 25.7548 | 3.79407 | 10 |
| -6 | 5  | -6 | 25.4536 | 1.95993 | 6  |
| 6  | 5  | 6  | 25.0912 | 5.27250 | 13 |
| -6 | 5  | -6 | 22.5614 | 3.72054 | 12 |
| -6 | 5  | -6 | 25.7470 | 2.29799 | 9  |
| -7 | -5 | -6 | 25.1930 | 3.10646 | 8  |
| -7 | 5  | -6 | 26.6674 | 2.11610 | 9  |
| -7 | 5  | -6 | 23.8177 | 1.85506 | 6  |
| 7  | 5  | 6  | 21.6873 | 4.34313 | 13 |
| -8 | 5  | -6 | 6.80761 | 0.85576 | 9  |
| 8  | 5  | 6  | 7.60617 | 2.72363 | 13 |
| 10 | -6 | -6 | 2.46650 | 2.55909 | 13 |
| 10 | 6  | -6 | 3.15694 | 2.92434 | 13 |
| -9 | -6 | 6  | 7.59048 | 2.32205 | 10 |
| 9  | -6 | -6 | 4.94342 | 2.85904 | 13 |
| 9  | 6  | -6 | 3.41187 | 3.48267 | 13 |
| -9 | 6  | 6  | 1.98523 | 1.79283 | 7  |
| 8  | -6 | -6 | 73.6486 | 7.47718 | 13 |
| -8 | -6 | 6  | 65.6271 | 7.95897 | 1  |
| -8 | -6 | 6  | 64.8501 | 6.73682 | 10 |
| -8 | 6  | 6  | 67.5940 | 5.89137 | 7  |
| 8  | 6  | -6 | 78.2733 | 8.17015 | 13 |
| -8 | 6  | 6  | 66.9776 | 4.74277 | 11 |
| -7 | -6 | 6  | 18.7836 | 3.73313 | 10 |
| -7 | -6 | 6  | 24.2908 | 5.45761 | 1  |
| -7 | 6  | 6  | 21.0790 | 2.55637 | 11 |
| 7  | 6  | -6 | 24.2136 | 4.83755 | 13 |
| 7  | 6  | -6 | 24.8072 | 4.27918 | 13 |
| -6 | -6 | 6  | 41.4160 | 5.32514 | 10 |
| 6  | -6 | -6 | 34.4386 | 6.85689 | 2  |



|    |    |    |         |         |    |
|----|----|----|---------|---------|----|
| -6 | -6 | 6  | 46.2206 | 7.37088 | 1  |
| -5 | -6 | 6  | 84.5853 | 9.01091 | 1  |
| 5  | -6 | -6 | 62.0593 | 7.90515 | 2  |
| -5 | -6 | 6  | 82.9273 | 9.55959 | 5  |
| -5 | 6  | 6  | 58.3857 | 5.46211 | 4  |
| -4 | -6 | 6  | 37.0010 | 5.97752 | 1  |
| 3  | -6 | -6 | 285.155 | 19.6822 | 2  |
| -3 | 6  | 6  | 276.892 | 18.4798 | 5  |
| 2  | -6 | -6 | 16.2267 | 3.39672 | 2  |
| -2 | 6  | 6  | 19.4217 | 4.20986 | 5  |
| 1  | -6 | -6 | 301.359 | 21.7524 | 2  |
| 1  | 6  | -6 | 341.466 | 20.8159 | 4  |
| 1  | 6  | -6 | 364.465 | 20.9041 | 5  |
| -1 | 6  | 6  | 291.901 | 22.2665 | 5  |
| 0  | 6  | -6 | 56.2370 | 4.44376 | 4  |
| -1 | 6  | -6 | 42.5263 | 3.47223 | 4  |
| -1 | 6  | -6 | 43.5228 | 3.47611 | 4  |
| -1 | 6  | -6 | 46.6460 | 3.76098 | 3  |
| -2 | 6  | -6 | 35.5197 | 3.11514 | 3  |
| -2 | 6  | -6 | 32.2601 | 2.53789 | 4  |
| -2 | 6  | -6 | 34.5506 | 2.57631 | 4  |
| -3 | -6 | -6 | 79.5053 | 8.42486 | 2  |
| -3 | -6 | -6 | 91.2664 | 8.74251 | 1  |
| -3 | 6  | -6 | 83.2073 | 6.16365 | 3  |
| -4 | -6 | -6 | 40.9236 | 5.70046 | 1  |
| -4 | -6 | -6 | 49.5426 | 5.69131 | 10 |
| -4 | -6 | -6 | 41.2758 | 4.02452 | 8  |
| -4 | -6 | -6 | 47.5033 | 6.35710 | 2  |
| -4 | 6  | -6 | 41.8147 | 3.23608 | 8  |
| -4 | 6  | -6 | 43.5313 | 3.14558 | 9  |
| -4 | 6  | -6 | 41.7017 | 2.94846 | 6  |
| -5 | -6 | -6 | 285.244 | 21.7359 | 1  |
| -5 | -6 | -6 | 281.841 | 18.1716 | 10 |
| -5 | -6 | -6 | 270.714 | 17.4708 | 8  |
| -5 | 6  | -6 | 266.332 | 16.5500 | 6  |
| -5 | 6  | -6 | 253.953 | 16.6963 | 9  |
| 5  | 6  | 6  | 265.917 | 19.2454 | 13 |
| -5 | 6  | -6 | 268.530 | 18.0102 | 12 |
| -6 | -6 | -6 | 2.12034 | 1.84463 | 10 |
| -6 | -6 | -6 | 1.54967 | 1.75007 | 8  |
| -6 | 6  | -6 | 1.48943 | 0.78940 | 9  |
| 6  | 6  | 6  | 1.40690 | 3.49383 | 13 |
| -6 | 6  | -6 | 1.52347 | 0.53790 | 6  |
| -6 | 6  | -6 | -1.5165 | 2.49574 | 12 |
| -7 | -6 | -6 | 6.57340 | 1.99658 | 8  |
| -7 | 6  | -6 | 7.99033 | 0.79069 | 6  |
| -7 | 6  | -6 | 6.88553 | 1.14088 | 9  |
| -8 | 6  | -6 | 58.6998 | 3.71793 | 9  |
| 8  | 6  | 6  | 57.8596 | 5.77450 | 13 |
| 10 | 7  | -6 | -1.2305 | 2.23453 | 13 |

|    |    |    |         |         |    |
|----|----|----|---------|---------|----|
| -9 | -7 | 6  | 11.9438 | 2.67325 | 10 |
| 9  | -7 | -6 | 8.40451 | 3.47544 | 13 |
| 9  | 7  | -6 | 7.75914 | 3.43130 | 13 |
| -9 | 7  | 6  | 11.9537 | 2.21763 | 7  |
| -8 | -7 | 6  | 16.5582 | 3.28584 | 10 |
| 8  | 7  | -6 | 13.2540 | 4.20244 | 13 |
| -7 | -7 | 6  | 116.364 | 11.8942 | 1  |
| -7 | -7 | 6  | 121.576 | 9.75249 | 10 |
| 7  | 7  | -6 | 110.961 | 9.97873 | 13 |
| -6 | -7 | 6  | 16.4645 | 3.69499 | 10 |
| 6  | -7 | -6 | 3.04202 | 3.77011 | 2  |
| -6 | -7 | 6  | 9.79523 | 4.38810 | 1  |
| -5 | -7 | 6  | 119.807 | 12.5587 | 1  |
| 5  | -7 | -6 | 161.724 | 13.0353 | 2  |
| -5 | 7  | 6  | 146.623 | 9.98469 | 4  |
| -4 | -7 | 6  | 17.5696 | 4.64596 | 1  |
| 4  | -7 | -6 | 17.0396 | 4.01700 | 2  |
| 3  | -7 | -6 | 195.514 | 14.4806 | 2  |
| -3 | 7  | 6  | 185.598 | 12.3352 | 5  |
| 2  | -7 | -6 | 15.7519 | 3.44155 | 2  |
| -2 | 7  | 6  | 15.6053 | 3.64471 | 5  |
| 1  | -7 | -6 | 115.612 | 8.98908 | 2  |
| 1  | 7  | -6 | 92.2448 | 7.28023 | 4  |
| 1  | 7  | -6 | 101.100 | 6.87149 | 5  |
| -1 | 7  | 6  | 108.110 | 9.10299 | 5  |
| 1  | 7  | -6 | 104.813 | 6.92522 | 5  |
| 0  | -7 | -6 | 10.5362 | 3.36038 | 2  |
| 0  | 7  | -6 | 5.17679 | 1.28404 | 4  |
| -1 | -7 | -6 | 6.14622 | 3.15410 | 1  |
| -1 | -7 | -6 | 9.07731 | 3.06692 | 2  |
| -1 | -7 | -6 | 9.38582 | 2.75495 | 5  |
| -1 | 7  | -6 | 5.40010 | 1.20957 | 4  |
| -1 | 7  | -6 | 4.64451 | 1.15247 | 4  |
| -1 | 7  | -6 | 5.72278 | 1.25252 | 3  |
| -2 | -7 | -6 | 76.9027 | 8.17735 | 1  |
| -2 | -7 | -6 | 76.5159 | 7.44771 | 2  |
| -2 | -7 | -6 | 69.5241 | 7.47791 | 5  |
| -2 | 7  | -6 | 74.5123 | 5.46030 | 3  |
| -3 | -7 | -6 | 307.954 | 22.0346 | 2  |
| -3 | -7 | -6 | 286.895 | 21.7137 | 1  |
| -3 | 7  | -6 | 317.845 | 18.6586 | 6  |
| -3 | 7  | -6 | 306.280 | 19.4185 | 3  |
| -4 | -7 | -6 | 27.7957 | 5.41943 | 2  |
| -4 | -7 | -6 | 31.4537 | 5.99643 | 1  |
| -4 | -7 | -6 | 25.3343 | 3.38160 | 8  |
| -4 | -7 | -6 | 25.5198 | 4.20297 | 10 |
| -4 | 7  | -6 | 24.9331 | 2.18948 | 9  |
| -5 | -7 | -6 | 120.257 | 10.2594 | 1  |
| -5 | -7 | -6 | 117.265 | 8.99535 | 10 |
| -5 | -7 | -6 | 119.852 | 8.36493 | 8  |

|    |    |    |         |         |    |
|----|----|----|---------|---------|----|
| 5  | 7  | 6  | 127.392 | 11.0370 | 13 |
| -5 | 7  | -6 | 107.971 | 7.37756 | 9  |
| -5 | 7  | -6 | 111.993 | 7.22143 | 6  |
| -5 | 7  | -6 | 110.022 | 8.73203 | 12 |
| -6 | -7 | -6 | 64.8156 | 5.62042 | 10 |
| -6 | 7  | -6 | 50.8771 | 3.82261 | 9  |
| -6 | 7  | -6 | 53.1103 | 6.13469 | 12 |
| -6 | 7  | -6 | 51.9509 | 3.65223 | 6  |
| 6  | 7  | 6  | 76.6510 | 8.17495 | 13 |
| -7 | -7 | -6 | 12.6915 | 2.26075 | 8  |
| -7 | 7  | -6 | 14.7377 | 1.14925 | 6  |
| -7 | 7  | -6 | 18.1274 | 1.65833 | 9  |
| -7 | 7  | -6 | 14.3970 | 1.16897 | 6  |
| 7  | 7  | 6  | 7.28557 | 3.82033 | 13 |
| 8  | 7  | 6  | 12.9504 | 2.74796 | 13 |
| -9 | -8 | 6  | -0.5116 | 1.46397 | 10 |
| -9 | 8  | 6  | 0.74017 | 1.67085 | 7  |
| 9  | 8  | -6 | -2.2371 | 3.60319 | 13 |
| -8 | -8 | 6  | 40.0847 | 5.15977 | 10 |
| 8  | 8  | -6 | 44.6742 | 7.21896 | 13 |
| -8 | 8  | 6  | 31.3141 | 4.00725 | 7  |
| -7 | -8 | 6  | 201.428 | 15.2051 | 10 |
| -7 | -8 | 6  | 219.586 | 17.8555 | 1  |
| -7 | 8  | 6  | 214.304 | 14.1421 | 7  |
| -7 | 8  | 6  | 213.595 | 13.2222 | 11 |
| 7  | 8  | -6 | 205.107 | 15.5133 | 13 |
| -6 | -8 | 6  | 0.68357 | 3.70766 | 1  |
| 6  | -8 | -6 | 1.12515 | 3.40083 | 2  |
| -6 | -8 | 6  | 2.32436 | 2.55704 | 10 |
| -6 | 8  | 6  | 3.14335 | 1.32308 | 11 |
| 5  | -8 | -6 | 13.4867 | 4.29982 | 2  |
| -5 | 8  | 6  | 12.5402 | 2.17880 | 4  |
| 4  | -8 | -6 | 143.573 | 12.2506 | 2  |
| -4 | -8 | 6  | 165.593 | 13.3708 | 1  |
| -4 | 8  | 6  | 126.906 | 9.85576 | 4  |
| 3  | -8 | -6 | 79.8958 | 8.05058 | 2  |
| 2  | -8 | -6 | 80.7317 | 7.77035 | 2  |
| -2 | 8  | 6  | 77.3468 | 6.76373 | 5  |
| 1  | -8 | -6 | 128.458 | 10.7939 | 2  |
| -1 | 8  | 6  | 127.635 | 10.6085 | 5  |
| 1  | 8  | -6 | 128.845 | 8.86184 | 4  |
| 0  | -8 | -6 | 12.6408 | 3.42432 | 2  |
| 0  | 8  | -6 | 15.2862 | 2.03011 | 4  |
| 0  | 8  | 6  | 12.9038 | 3.52356 | 5  |
| -1 | -8 | -6 | 6.54342 | 2.63138 | 2  |
| -1 | -8 | -6 | 3.28005 | 2.56835 | 1  |
| -1 | 8  | -6 | 2.52688 | 0.88800 | 4  |
| -1 | 8  | -6 | 3.03337 | 0.94854 | 4  |
| -1 | 8  | -6 | 3.13073 | 0.92417 | 4  |
| -2 | -8 | -6 | 330.545 | 23.4681 | 1  |

|    |    |    |         |         |    |
|----|----|----|---------|---------|----|
| -2 | -8 | -6 | 334.017 | 23.0696 | 2  |
| -2 | -8 | -6 | 316.257 | 23.1631 | 5  |
| -2 | 8  | -6 | 335.204 | 20.8033 | 3  |
| -3 | -8 | -6 | 15.5438 | 4.45518 | 1  |
| -3 | -8 | -6 | 15.2171 | 4.38576 | 2  |
| -3 | 8  | -6 | 10.8068 | 1.09119 | 6  |
| -3 | 8  | -6 | 12.5286 | 1.91783 | 3  |
| -4 | -8 | -6 | 54.6939 | 5.40689 | 8  |
| -4 | -8 | -6 | 53.1622 | 6.21472 | 10 |
| -4 | -8 | -6 | 54.8903 | 7.41922 | 1  |
| -4 | -8 | -6 | 53.6002 | 7.58950 | 2  |
| -4 | 8  | -6 | 69.0109 | 3.98271 | 6  |
| -4 | 8  | -6 | 72.5739 | 6.02792 | 12 |
| -4 | 8  | -6 | 62.0815 | 4.09436 | 9  |
| -5 | -8 | -6 | 1.59102 | 1.83998 | 8  |
| -5 | -8 | -6 | 0.95357 | 2.60087 | 1  |
| -5 | -8 | -6 | 1.87350 | 2.27347 | 10 |
| -5 | 8  | -6 | 2.25305 | 0.62267 | 6  |
| -5 | 8  | -6 | 3.06354 | 0.80876 | 9  |
| -5 | 8  | -6 | 2.84793 | 2.36139 | 12 |
| 5  | 8  | 6  | 0.33281 | 4.25843 | 13 |
| -6 | -8 | -6 | 65.8699 | 6.36318 | 10 |
| -6 | -8 | -6 | 66.0690 | 6.04760 | 8  |
| -6 | 8  | -6 | 77.3453 | 6.59992 | 12 |
| -6 | 8  | -6 | 82.1558 | 4.91485 | 9  |
| -6 | 8  | -6 | 76.9484 | 4.71495 | 6  |
| -6 | 8  | -6 | 78.5020 | 4.71483 | 6  |
| 6  | 8  | 6  | 64.0904 | 8.22993 | 13 |
| -7 | -8 | -6 | 56.6824 | 4.86001 | 8  |
| -7 | -8 | -6 | 49.5292 | 4.71405 | 10 |
| 7  | 8  | 6  | 65.7635 | 6.99784 | 13 |
| -7 | 8  | -6 | 57.1556 | 3.49863 | 6  |
| -7 | 8  | -6 | 56.5939 | 3.49846 | 6  |
| -7 | 8  | -6 | 58.5463 | 3.70991 | 9  |
| 8  | 8  | 6  | 12.2887 | 2.61867 | 13 |
| -9 | -9 | 6  | 5.65967 | 2.42336 | 10 |
| -9 | 9  | 6  | 8.70143 | 1.94676 | 7  |
| 9  | 9  | -6 | 0.66106 | 2.81711 | 13 |
| -8 | -9 | 6  | 33.8784 | 5.16855 | 10 |
| -8 | 9  | 6  | 35.4667 | 4.09861 | 7  |
| 8  | 9  | -6 | 44.3493 | 6.35406 | 13 |
| -7 | -9 | 6  | 75.0186 | 7.31012 | 10 |
| -7 | -9 | 6  | 76.6133 | 10.3832 | 1  |
| 7  | 9  | -6 | 72.0971 | 8.26966 | 13 |
| -6 | -9 | 6  | 41.4692 | 8.02096 | 1  |
| -6 | -9 | 6  | 51.3070 | 6.16923 | 10 |
| 6  | 9  | -6 | 54.3923 | 6.69683 | 13 |
| 5  | -9 | -6 | 20.4402 | 4.98227 | 2  |
| -5 | -9 | 6  | 13.5745 | 4.82435 | 1  |
| -5 | 9  | 6  | 16.6813 | 2.54607 | 7  |

|    |     |    |         |         |    |
|----|-----|----|---------|---------|----|
| 4  | -9  | -6 | 29.1104 | 5.68037 | 2  |
| -4 | 9   | 6  | 23.9952 | 3.18806 | 4  |
| 3  | -9  | -6 | 267.168 | 19.8171 | 2  |
| 2  | -9  | -6 | 40.9800 | 6.21503 | 2  |
| 1  | -9  | -6 | 270.942 | 18.3275 | 2  |
| -1 | 9   | 6  | 260.391 | 17.8066 | 5  |
| 1  | 9   | -6 | 223.377 | 16.1700 | 4  |
| 0  | -9  | -6 | 72.5060 | 7.69996 | 2  |
| 0  | 9   | 6  | 67.3565 | 7.40264 | 5  |
| 0  | 9   | -6 | 59.3986 | 4.82908 | 4  |
| -1 | -9  | -6 | 14.1523 | 3.95585 | 1  |
| -1 | -9  | -6 | 18.0088 | 3.92805 | 2  |
| -1 | 9   | -6 | 15.5754 | 1.66536 | 4  |
| -1 | 9   | -6 | 14.9797 | 1.64751 | 4  |
| -2 | -9  | -6 | 24.7825 | 4.82516 | 2  |
| -2 | -9  | -6 | 20.9751 | 4.65209 | 1  |
| -2 | -9  | -6 | 20.3814 | 4.64149 | 5  |
| -3 | -9  | -6 | 408.844 | 27.3420 | 1  |
| -3 | -9  | -6 | 415.828 | 27.5245 | 2  |
| -3 | 9   | -6 | 367.430 | 23.3070 | 6  |
| -3 | 9   | -6 | 352.529 | 23.3938 | 9  |
| -4 | -9  | -6 | 50.9817 | 7.38800 | 1  |
| -4 | -9  | -6 | 49.2574 | 5.58467 | 10 |
| -4 | -9  | -6 | 47.2513 | 7.89277 | 2  |
| -4 | -9  | -6 | 51.9624 | 4.75824 | 8  |
| 4  | 9   | 6  | 50.2281 | 6.64552 | 13 |
| -5 | -9  | -6 | 63.9672 | 6.85718 | 10 |
| -5 | -9  | -6 | 64.6083 | 6.28940 | 8  |
| -5 | -9  | -6 | 68.5746 | 8.71778 | 1  |
| -5 | 9   | -6 | 87.3158 | 4.96284 | 6  |
| 5  | 9   | 6  | 62.3704 | 8.13337 | 13 |
| -5 | 9   | -6 | 88.3542 | 5.16631 | 9  |
| -5 | 9   | -6 | 90.7330 | 7.51688 | 12 |
| -5 | 9   | -6 | 88.7063 | 4.99643 | 6  |
| -6 | -9  | -6 | 100.522 | 7.86284 | 10 |
| -6 | -9  | -6 | 98.2567 | 7.49178 | 8  |
| -6 | 9   | -6 | 96.0307 | 6.24024 | 9  |
| -6 | 9   | -6 | 99.1516 | 6.09418 | 6  |
| -6 | 9   | -6 | 95.6166 | 6.07470 | 6  |
| 6  | 9   | 6  | 106.605 | 10.3668 | 13 |
| -6 | 9   | -6 | 99.7030 | 7.88004 | 12 |
| -7 | -9  | -6 | 25.8521 | 2.90930 | 8  |
| -7 | -9  | -6 | 27.1220 | 3.32247 | 10 |
| -7 | 9   | -6 | 29.4130 | 1.82188 | 9  |
| -7 | 9   | -6 | 24.2631 | 3.79031 | 12 |
| 7  | 9   | 6  | 25.1237 | 4.31634 | 13 |
| -7 | 9   | -6 | 27.0547 | 1.80300 | 9  |
| 8  | 9   | 6  | 16.4465 | 2.73595 | 13 |
| -9 | -10 | 6  | 7.64717 | 2.50383 | 10 |
| -9 | 10  | 6  | 3.67932 | 1.72881 | 7  |

|    |     |    |         |         |    |
|----|-----|----|---------|---------|----|
| -8 | -10 | 6  | 4.73753 | 2.86823 | 10 |
| -8 | 10  | 6  | 19.0513 | 3.03596 | 7  |
| -7 | -10 | 6  | 6.19194 | 4.50933 | 1  |
| -7 | -10 | 6  | 2.31789 | 2.80483 | 10 |
| -7 | 10  | 6  | 9.44816 | 2.25758 | 7  |
| -6 | -10 | 6  | 208.720 | 19.3552 | 1  |
| -6 | -10 | 6  | 196.776 | 15.9799 | 10 |
| -6 | 10  | 6  | 247.802 | 14.9555 | 7  |
| -6 | 10  | 6  | 240.659 | 14.1882 | 11 |
| 5  | -10 | -6 | 12.8380 | 4.59536 | 2  |
| 4  | -10 | -6 | 9.89818 | 3.94303 | 2  |
| -4 | 10  | 6  | 8.15149 | 1.75493 | 4  |
| 3  | -10 | -6 | 361.713 | 25.5655 | 2  |
| 2  | -10 | -6 | 523.023 | 34.8951 | 2  |
| 1  | 10  | -6 | 247.217 | 16.1316 | 4  |
| 0  | -10 | -6 | 3.01386 | 3.34817 | 2  |
| 0  | 10  | -6 | 1.15864 | 1.02544 | 4  |
| 0  | 10  | 6  | 4.14269 | 2.61552 | 5  |
| -1 | -10 | -6 | 10.7217 | 3.82122 | 1  |
| -1 | -10 | -6 | 14.2258 | 3.79104 | 2  |
| -1 | 10  | -6 | 19.5032 | 1.61106 | 4  |
| -1 | 10  | -6 | 19.2204 | 1.62556 | 4  |
| -2 | -10 | -6 | 16.9706 | 4.01087 | 2  |
| -2 | -10 | -6 | 18.8732 | 4.61679 | 1  |
| -2 | 10  | -6 | 11.1290 | 1.11021 | 6  |
| -3 | -10 | -6 | 6.21799 | 3.87563 | 2  |
| -4 | -10 | -6 | 383.567 | 24.9290 | 10 |
| -4 | -10 | -6 | 419.593 | 27.9293 | 1  |
| 4  | 10  | 6  | 397.404 | 25.2862 | 13 |
| -4 | 10  | -6 | 397.979 | 24.5737 | 12 |
| -4 | 10  | -6 | 346.701 | 23.1224 | 9  |
| -4 | 10  | -6 | 354.509 | 23.0031 | 6  |
| -4 | 10  | -6 | 365.706 | 23.0420 | 6  |
| -5 | -10 | -6 | 30.1620 | 6.42522 | 1  |
| -5 | -10 | -6 | 26.1322 | 4.28390 | 10 |
| -5 | 10  | -6 | 12.7622 | 3.06198 | 12 |
| -5 | 10  | -6 | 16.0585 | 1.30183 | 6  |
| -5 | 10  | -6 | 15.9894 | 1.23690 | 6  |
| -5 | 10  | -6 | 15.4657 | 1.50708 | 9  |
| -6 | -10 | -6 | 18.6437 | 3.19444 | 10 |
| -6 | -10 | -6 | 16.7696 | 2.77299 | 8  |
| -6 | 10  | -6 | 11.6828 | 1.35901 | 9  |
| -6 | 10  | -6 | 11.3959 | 1.22310 | 9  |
| -6 | 10  | -6 | 6.07908 | 2.78501 | 12 |
| -6 | 10  | -6 | 10.4928 | 0.84919 | 6  |
| -7 | -10 | -6 | 2.15555 | 1.65620 | 10 |
| -7 | -10 | -6 | 1.54483 | 1.82679 | 8  |
| -7 | 10  | -6 | 2.32290 | 2.03087 | 12 |
| 7  | 10  | 6  | 2.40358 | 2.98068 | 13 |
| -9 | -11 | 6  | 1.65454 | 1.59690 | 10 |

|    |     |    |         |         |    |
|----|-----|----|---------|---------|----|
| -9 | 11  | 6  | 0.67349 | 1.48083 | 7  |
| -8 | -11 | 6  | 3.53221 | 2.70806 | 10 |
| -8 | 11  | 6  | 2.55576 | 1.82426 | 7  |
| -7 | -11 | 6  | 37.9955 | 5.57487 | 10 |
| -7 | -11 | 6  | 43.7652 | 7.79448 | 1  |
| -7 | 11  | 6  | 29.2111 | 3.90555 | 7  |
| -6 | -11 | 6  | 138.748 | 13.6919 | 1  |
| -6 | -11 | 6  | 127.079 | 10.4568 | 10 |
| -6 | 11  | 6  | 118.818 | 8.09806 | 11 |
| -6 | 11  | 6  | 127.081 | 9.01689 | 7  |
| 5  | -11 | -6 | 73.4831 | 9.76827 | 2  |
| -5 | -11 | 6  | 56.5920 | 8.90090 | 1  |
| 5  | 11  | -6 | 57.4365 | 6.92239 | 10 |
| -5 | 11  | 6  | 65.3673 | 4.69746 | 11 |
| 4  | -11 | -6 | 38.0007 | 6.62934 | 2  |
| -4 | 11  | 6  | 29.1528 | 3.49803 | 4  |
| 3  | -11 | -6 | 117.140 | 11.0582 | 2  |
| 2  | -11 | -6 | 32.9477 | 5.87955 | 2  |
| 1  | -11 | -6 | 511.438 | 36.6516 | 2  |
| 1  | 11  | -6 | 591.593 | 34.6272 | 4  |
| 0  | -11 | -6 | 35.0331 | 6.57837 | 2  |
| 0  | 11  | -6 | 44.0133 | 3.48302 | 4  |
| -1 | -11 | -6 | 137.410 | 12.8327 | 1  |
| -1 | -11 | -6 | 143.441 | 12.2369 | 2  |
| -2 | -11 | -6 | 32.6840 | 6.21814 | 1  |
| -2 | -11 | -6 | 32.0095 | 5.66289 | 2  |
| -2 | 11  | -6 | 24.9620 | 1.94999 | 6  |
| -2 | 11  | -6 | 29.8061 | 2.41403 | 9  |
| -3 | -11 | -6 | 32.7587 | 5.37779 | 10 |
| -3 | -11 | -6 | 34.9152 | 6.63402 | 1  |
| -3 | -11 | -6 | 33.7376 | 6.19012 | 2  |
| -3 | 11  | -6 | 18.2837 | 1.62961 | 6  |
| -3 | 11  | -6 | 21.9794 | 1.95019 | 9  |
| -4 | -11 | -6 | 6.49658 | 4.02406 | 1  |
| -4 | -11 | -6 | 3.63261 | 2.68762 | 10 |
| 4  | 11  | 6  | 4.95220 | 4.04978 | 13 |
| -4 | 11  | -6 | 5.53336 | 0.69489 | 6  |
| -4 | 11  | -6 | 6.25642 | 0.63849 | 6  |
| -4 | 11  | -6 | 9.74612 | 2.78414 | 12 |
| -4 | 11  | -6 | 7.14368 | 0.93690 | 9  |
| -5 | -11 | -6 | 240.467 | 18.2954 | 8  |
| -5 | -11 | -6 | 257.575 | 18.0299 | 10 |
| -5 | -11 | -6 | 276.269 | 20.4438 | 1  |
| -5 | 11  | -6 | 260.207 | 16.0006 | 6  |
| -5 | 11  | -6 | 271.431 | 17.7077 | 12 |
| -5 | 11  | -6 | 270.241 | 16.0245 | 6  |
| -5 | 11  | -6 | 267.218 | 16.1261 | 9  |
| 5  | 11  | 6  | 261.390 | 18.8630 | 13 |
| -6 | -11 | -6 | 10.3972 | 2.76492 | 10 |
| -6 | -11 | -6 | 12.7757 | 2.52785 | 8  |

|    |     |    |         |         |    |
|----|-----|----|---------|---------|----|
| 6  | 11  | 6  | 11.9493 | 3.74146 | 13 |
| -6 | 11  | -6 | 9.17776 | 2.82234 | 12 |
| -7 | -11 | -6 | 0.33072 | 1.67094 | 8  |
| -7 | -11 | -6 | 1.61228 | 1.53465 | 10 |
| -7 | 11  | -6 | 0.28543 | 1.81577 | 12 |
| 7  | 11  | 6  | 5.58806 | 2.76670 | 13 |
| -9 | -12 | 6  | 0.72693 | 2.05311 | 10 |
| -7 | -12 | 6  | 88.5871 | 8.19279 | 10 |
| -7 | -12 | 6  | 83.7588 | 10.4762 | 1  |
| -7 | 12  | 6  | 85.4600 | 6.70255 | 7  |
| -6 | -12 | 6  | 34.1221 | 7.41785 | 1  |
| -6 | 12  | 6  | 41.6000 | 3.11246 | 11 |
| -6 | 12  | 6  | 44.4489 | 4.25413 | 7  |
| -6 | 12  | 6  | 41.7978 | 3.05512 | 11 |
| -5 | -12 | 6  | 37.7499 | 8.67708 | 1  |
| -5 | -12 | 6  | 29.5945 | 4.81471 | 13 |
| 5  | -12 | -6 | 27.0296 | 6.66081 | 2  |
| 5  | 12  | -6 | 36.6352 | 5.92031 | 10 |
| -5 | 12  | 6  | 19.5519 | 2.58601 | 11 |
| 4  | -12 | -6 | 99.5442 | 10.7119 | 2  |
| 3  | -12 | -6 | 101.855 | 10.4191 | 2  |
| 2  | -12 | -6 | 10.3865 | 3.98571 | 2  |
| 1  | -12 | -6 | 154.415 | 13.7525 | 2  |
| 1  | 12  | -6 | 175.586 | 11.3225 | 4  |
| 0  | -12 | -6 | 165.072 | 12.8263 | 2  |
| 0  | 12  | -6 | 127.835 | 9.37307 | 4  |
| -1 | -12 | -6 | 71.5819 | 8.28359 | 2  |
| -2 | -12 | -6 | 6.12034 | 4.19181 | 1  |
| -2 | -12 | -6 | 3.76536 | 3.19805 | 2  |
| -2 | 12  | -6 | 5.86191 | 0.68455 | 6  |
| -2 | 12  | -6 | 5.91852 | 0.96017 | 9  |
| -3 | -12 | -6 | 52.0800 | 7.95232 | 1  |
| -3 | -12 | -6 | 47.8741 | 5.76518 | 10 |
| -3 | 12  | -6 | 50.0569 | 6.16294 | 12 |
| -3 | 12  | -6 | 50.6650 | 3.44203 | 9  |
| -3 | 12  | -6 | 48.4147 | 3.20224 | 6  |
| -4 | -12 | -6 | 32.9189 | 4.82952 | 10 |
| -4 | -12 | -6 | 35.4908 | 7.03048 | 1  |
| -4 | 12  | -6 | 33.6420 | 5.41654 | 12 |
| 4  | 12  | 6  | 26.3869 | 4.29497 | 13 |
| -4 | 12  | -6 | 23.3910 | 1.71592 | 6  |
| -4 | 12  | -6 | 24.1750 | 1.93540 | 9  |
| -4 | 12  | -6 | 21.4025 | 1.66150 | 6  |
| -5 | -12 | -6 | 302.617 | 20.9817 | 10 |
| -5 | -12 | -6 | 312.624 | 23.1157 | 1  |
| -5 | 12  | -6 | 312.298 | 20.6009 | 12 |
| -5 | 12  | -6 | 323.316 | 18.9548 | 9  |
| -5 | 12  | -6 | 316.862 | 18.9911 | 9  |
| -5 | 12  | -6 | 320.129 | 18.8334 | 6  |
| -5 | 12  | -6 | 304.129 | 18.8287 | 6  |



|    |     |    |         |         |    |
|----|-----|----|---------|---------|----|
| 5  | 12  | 6  | 292.324 | 21.1587 | 13 |
| -6 | -12 | -6 | 4.07543 | 2.17001 | 8  |
| -6 | -12 | -6 | 7.86560 | 2.45943 | 10 |
| 6  | 12  | 6  | 8.03260 | 3.28917 | 13 |
| -6 | 12  | -6 | 5.33473 | 2.57979 | 12 |
| -7 | -12 | -6 | 2.73199 | 1.59645 | 10 |
| -7 | 12  | -6 | 1.61174 | 1.84955 | 12 |
| 7  | 12  | 6  | 4.58254 | 2.35834 | 13 |
| -9 | -13 | 6  | 13.0304 | 2.62288 | 10 |
| -8 | -13 | 6  | 18.6147 | 3.54235 | 10 |
| -8 | 13  | 6  | 15.0062 | 2.43045 | 7  |
| -6 | 13  | 6  | 15.3464 | 1.34752 | 11 |
| -6 | 13  | 6  | 19.3973 | 3.16066 | 7  |
| -6 | 13  | 6  | 15.9293 | 1.40463 | 11 |
| -5 | -13 | 6  | 55.3561 | 5.38019 | 13 |
| 5  | 13  | -6 | 53.8920 | 6.55730 | 10 |
| -5 | 13  | 6  | 44.6460 | 3.77381 | 11 |
| 4  | -13 | -6 | 17.7353 | 5.14503 | 2  |
| -4 | 13  | 6  | 18.5409 | 3.27127 | 10 |
| 4  | 13  | -6 | 13.7155 | 3.65520 | 10 |
| 3  | -13 | -6 | 70.8573 | 8.84395 | 2  |
| 2  | -13 | -6 | 57.6708 | 7.91459 | 2  |
| 1  | -13 | -6 | 47.5482 | 7.65644 | 2  |
| 1  | 13  | -6 | 62.3918 | 4.88283 | 4  |
| 0  | -13 | -6 | 54.4782 | 7.43616 | 2  |
| 0  | 13  | -6 | 54.9462 | 4.21094 | 4  |
| -1 | -13 | -6 | 4.92974 | 3.39812 | 2  |
| -1 | 13  | -6 | 17.2892 | 1.90753 | 9  |
| -2 | -13 | -6 | 4.23087 | 4.18145 | 1  |
| -2 | -13 | -6 | 4.39086 | 3.98995 | 2  |
| -2 | 13  | -6 | 6.05890 | 0.69091 | 6  |
| 2  | 13  | 6  | 0.02560 | 4.08466 | 10 |
| -3 | -13 | -6 | 0.99411 | 2.80212 | 10 |
| -3 | -13 | -6 | 1.80239 | 3.75372 | 1  |
| -3 | 13  | -6 | 3.40016 | 0.54261 | 6  |
| -3 | 13  | -6 | 5.79708 | 2.70965 | 12 |
| -3 | 13  | -6 | 1.43288 | 2.89017 | 14 |
| -3 | 13  | -6 | 2.38897 | 0.86525 | 9  |
| -4 | -13 | -6 | 104.808 | 11.0170 | 1  |
| -4 | -13 | -6 | 103.404 | 8.38888 | 10 |
| -4 | 13  | -6 | 90.1792 | 7.74192 | 14 |
| -4 | 13  | -6 | 87.9554 | 7.74612 | 12 |
| -4 | 13  | -6 | 90.2769 | 5.82162 | 9  |
| -4 | 13  | -6 | 91.6128 | 5.92225 | 9  |
| -4 | 13  | -6 | 88.4031 | 5.67940 | 6  |
| 4  | 13  | 6  | 96.0889 | 9.04416 | 13 |
| -4 | 13  | -6 | 86.9131 | 5.66666 | 6  |
| -5 | -13 | -6 | 56.9387 | 5.71667 | 10 |
| 5  | 13  | 6  | 56.8170 | 7.60597 | 13 |
| -5 | 13  | -6 | 58.8902 | 6.41604 | 12 |

|    |     |    |         |         |    |
|----|-----|----|---------|---------|----|
| -6 | -13 | -6 | 2.03360 | 1.73200 | 10 |
| -6 | 13  | -6 | 2.64309 | 2.46514 | 12 |
| 6  | 13  | 6  | 0.11526 | 2.80673 | 13 |
| -7 | -13 | -6 | 1.30885 | 1.47383 | 10 |
| -7 | 13  | -6 | 0.96535 | 1.69329 | 12 |
| -8 | -14 | 6  | 23.7780 | 3.59595 | 10 |
| -8 | 14  | 6  | 24.7794 | 1.84922 | 6  |
| -8 | 14  | 6  | 25.7823 | 2.07360 | 9  |
| -8 | 14  | 6  | 25.4758 | 3.09307 | 7  |
| -7 | -14 | 6  | 8.47444 | 3.29462 | 10 |
| -7 | 14  | 6  | 5.41391 | 1.96460 | 7  |
| 6  | 14  | -6 | 75.0262 | 8.30616 | 10 |
| -5 | -14 | 6  | 102.961 | 8.26697 | 13 |
| -5 | 14  | 6  | 103.131 | 6.96311 | 11 |
| 5  | 14  | -6 | 113.441 | 9.68537 | 10 |
| -4 | -14 | 6  | 52.8741 | 5.50033 | 13 |
| 4  | -14 | -6 | 53.5406 | 8.73421 | 2  |
| 4  | 14  | -6 | 52.8237 | 6.44940 | 10 |
| -4 | 14  | 6  | 45.4998 | 4.09084 | 11 |
| 3  | -14 | -6 | 4.96381 | 3.90555 | 2  |
| 3  | 14  | -6 | 8.26726 | 2.85254 | 10 |
| 2  | -14 | -6 | 20.9386 | 5.34275 | 2  |
| 0  | -14 | -6 | 22.3211 | 5.37482 | 2  |
| -1 | -14 | -6 | 151.371 | 13.1278 | 2  |
| -1 | 14  | -6 | 139.730 | 8.75980 | 11 |
| 1  | 14  | 6  | 142.276 | 14.4372 | 10 |
| -1 | 14  | -6 | 128.789 | 8.85082 | 9  |
| -2 | -14 | -6 | 123.065 | 11.9276 | 1  |
| -2 | -14 | -6 | 126.537 | 11.6198 | 2  |
| -2 | 14  | -6 | 102.798 | 7.10651 | 9  |
| -2 | 14  | -6 | 102.993 | 8.84219 | 14 |
| -2 | 14  | -6 | 106.306 | 6.86077 | 6  |
| -2 | 14  | -6 | 99.6468 | 8.33340 | 12 |
| 2  | 14  | 6  | 128.588 | 10.9566 | 10 |
| -3 | -14 | -6 | 33.3327 | 5.11873 | 10 |
| -3 | -14 | -6 | 27.1066 | 6.39285 | 1  |
| -3 | 14  | -6 | 30.7065 | 4.79330 | 14 |
| -3 | 14  | -6 | 27.7404 | 4.49697 | 12 |
| -3 | 14  | -6 | 29.6101 | 2.09488 | 6  |
| -3 | 14  | -6 | 30.7782 | 2.10045 | 6  |
| -3 | 14  | -6 | 32.8817 | 2.41485 | 9  |
| -4 | -14 | -6 | 120.787 | 12.7051 | 1  |
| -4 | -14 | -6 | 130.792 | 10.2866 | 10 |
| -4 | 14  | -6 | 122.524 | 10.0980 | 14 |
| -4 | 14  | -6 | 118.845 | 7.61077 | 6  |
| -4 | 14  | -6 | 124.548 | 7.82103 | 9  |
| -4 | 14  | -6 | 124.445 | 7.62583 | 6  |
| -4 | 14  | -6 | 124.802 | 9.72841 | 12 |
| -4 | 14  | -6 | 129.355 | 7.79582 | 9  |
| -5 | -14 | -6 | 51.3758 | 5.65977 | 10 |

|    |     |    |         |         |    |
|----|-----|----|---------|---------|----|
| -5 | 14  | -6 | 70.6569 | 6.36686 | 12 |
| -6 | -14 | -6 | 3.00094 | 1.75090 | 10 |
| -6 | 14  | -6 | 4.18003 | 2.42199 | 12 |
| -7 | -14 | -6 | 1.17658 | 1.46484 | 10 |
| -7 | 14  | -6 | 0.91757 | 1.61572 | 12 |
| -8 | -15 | 6  | 17.5240 | 3.34804 | 10 |
| -8 | 15  | 6  | 19.9638 | 1.69043 | 9  |
| -8 | 15  | 6  | 20.0809 | 2.78813 | 7  |
| -7 | -15 | 6  | 63.7156 | 6.32186 | 10 |
| 7  | 15  | -6 | 70.5862 | 6.99452 | 10 |
| -7 | 15  | 6  | 74.9558 | 5.98520 | 7  |
| 6  | 15  | -6 | 73.0363 | 8.32104 | 10 |
| -5 | -15 | 6  | 124.416 | 10.1394 | 13 |
| -5 | 15  | 6  | 138.596 | 8.31692 | 11 |
| -5 | 15  | 6  | 135.395 | 8.31030 | 11 |
| 5  | 15  | -6 | 117.488 | 10.8581 | 10 |
| -4 | -15 | 6  | 6.73569 | 2.66721 | 13 |
| 4  | 15  | -6 | 7.45002 | 3.45196 | 10 |
| -3 | -15 | 6  | 29.7358 | 4.54816 | 13 |
| 3  | -15 | -6 | 38.9272 | 7.29333 | 2  |
| 3  | 15  | -6 | 36.5281 | 5.71919 | 10 |
| -3 | 15  | 6  | 36.7143 | 4.25290 | 10 |
| 2  | -15 | -6 | 31.3009 | 6.39510 | 2  |
| -2 | 15  | 6  | 22.8765 | 4.30914 | 10 |
| 2  | 15  | -6 | 25.0627 | 4.33566 | 10 |
| 1  | -15 | -6 | 23.7141 | 5.88427 | 2  |
| -1 | 15  | 6  | 17.4143 | 3.52730 | 10 |
| 0  | -15 | -6 | 8.82224 | 4.36036 | 2  |
| 0  | 15  | -6 | 12.6787 | 2.08644 | 11 |
| 0  | 15  | 6  | 8.19182 | 3.50095 | 10 |
| -1 | -15 | -6 | 12.1267 | 4.34988 | 2  |
| 1  | 15  | 6  | 11.2241 | 3.98244 | 10 |
| -1 | 15  | -6 | 7.59401 | 1.29023 | 9  |
| -2 | -15 | -6 | 6.65012 | 4.98636 | 1  |
| -2 | 15  | -6 | 8.26012 | 1.26545 | 9  |
| -2 | 15  | -6 | 4.60154 | 0.68222 | 6  |
| -2 | 15  | -6 | 11.8664 | 2.83845 | 12 |
| -2 | 15  | -6 | 15.1360 | 3.14965 | 14 |
| -3 | 15  | -6 | 129.496 | 7.96017 | 6  |
| -3 | 15  | -6 | 125.125 | 10.1001 | 12 |
| -3 | 15  | -6 | 123.683 | 7.95695 | 6  |
| -3 | 15  | -6 | 136.277 | 8.20099 | 9  |
| -3 | 15  | -6 | 129.152 | 9.85533 | 14 |
| -4 | -15 | -6 | 17.7373 | 4.11038 | 10 |
| -4 | -15 | -6 | 11.8573 | 4.96566 | 1  |
| -4 | 15  | -6 | 16.5148 | 3.43475 | 14 |
| -4 | 15  | -6 | 12.3129 | 1.25248 | 9  |
| -4 | 15  | -6 | 10.5961 | 1.20468 | 9  |
| -4 | 15  | -6 | 15.2741 | 3.94973 | 12 |
| -5 | -15 | -6 | 33.2048 | 4.36900 | 10 |

|    |     |    |         |         |    |
|----|-----|----|---------|---------|----|
| -5 | 15  | -6 | 43.0308 | 5.17200 | 12 |
| -6 | -15 | -6 | 75.6594 | 6.17369 | 10 |
| -6 | 15  | -6 | 61.8952 | 6.00178 | 12 |
| -8 | -16 | 6  | -0.0019 | 1.57442 | 10 |
| 7  | 16  | -6 | 61.4702 | 6.62886 | 10 |
| -7 | 16  | 6  | 68.2573 | 4.54244 | 9  |
| 6  | 16  | -6 | 60.6011 | 7.40685 | 10 |
| -5 | -16 | 6  | 260.153 | 18.0280 | 13 |
| 5  | 16  | -6 | 273.536 | 19.2150 | 10 |
| -5 | 16  | 6  | 268.234 | 16.5199 | 11 |
| -5 | 16  | 6  | 278.932 | 16.5277 | 11 |
| -4 | -16 | 6  | 3.63460 | 2.53960 | 13 |
| 4  | 16  | -6 | 4.88090 | 3.30745 | 10 |
| -4 | 16  | 6  | 6.18606 | 1.48053 | 11 |
| 3  | -16 | -6 | 20.6324 | 3.43393 | 13 |
| -3 | -16 | 6  | 11.0529 | 3.02886 | 13 |
| 3  | 16  | -6 | 14.8255 | 3.56812 | 10 |
| -3 | 16  | 6  | 20.8627 | 3.28930 | 10 |
| -2 | -16 | 6  | 23.4004 | 3.67969 | 13 |
| 2  | -16 | -6 | 29.1176 | 6.32974 | 2  |
| 2  | -16 | -6 | 29.1504 | 4.77505 | 13 |
| 2  | 16  | -6 | 26.9029 | 4.33045 | 10 |
| -2 | 16  | 6  | 32.6084 | 4.79029 | 10 |
| 1  | -16 | -6 | 62.3627 | 9.54001 | 2  |
| 1  | 16  | -6 | 43.0592 | 4.85003 | 10 |
| -1 | 16  | 6  | 60.6314 | 6.20758 | 10 |
| 0  | -16 | -6 | 6.70375 | 2.83320 | 13 |
| 0  | -16 | -6 | 0.25350 | 3.42683 | 2  |
| 0  | 16  | -6 | -0.2301 | 3.30812 | 14 |
| 0  | 16  | -6 | 2.10620 | 1.31742 | 11 |
| 0  | 16  | 6  | 4.75362 | 3.00359 | 10 |
| -1 | -16 | -6 | 20.7221 | 3.69635 | 13 |
| 1  | 16  | 6  | 21.8838 | 4.73560 | 10 |
| -1 | 16  | -6 | 26.0438 | 3.63244 | 14 |
| -1 | 16  | -6 | 28.5621 | 2.46351 | 9  |
| -2 | -16 | -6 | 27.2749 | 4.97754 | 13 |
| -2 | 16  | -6 | 41.5050 | 5.85794 | 14 |
| -2 | 16  | -6 | 39.7203 | 2.62141 | 6  |
| -2 | 16  | -6 | 40.6052 | 3.03715 | 9  |
| 2  | 16  | 6  | 42.0820 | 6.59082 | 10 |
| -2 | 16  | -6 | 38.7632 | 4.75385 | 12 |
| -3 | -16 | -6 | 42.9665 | 8.00842 | 1  |
| -3 | 16  | -6 | 30.3882 | 4.66641 | 12 |
| 3  | 16  | 6  | 42.6953 | 6.83506 | 10 |
| -3 | 16  | -6 | 29.0569 | 2.46185 | 9  |
| -3 | 16  | -6 | 31.9117 | 4.20457 | 14 |
| -3 | 16  | -6 | 30.8869 | 2.14839 | 6  |
| -3 | 16  | -6 | 30.4445 | 2.09002 | 6  |
| -4 | -16 | -6 | 5.82015 | 3.29612 | 10 |
| -4 | 16  | -6 | 3.34382 | 2.86373 | 12 |

|    |     |    |         |         |    |
|----|-----|----|---------|---------|----|
| -4 | 16  | -6 | 2.15429 | 0.52189 | 9  |
| -4 | 16  | -6 | 6.46223 | 2.99815 | 14 |
| -4 | 16  | -6 | 1.97518 | 0.56060 | 9  |
| -5 | -16 | -6 | 57.2811 | 5.97619 | 10 |
| -5 | 16  | -6 | 41.3292 | 4.78676 | 12 |
| -6 | -16 | -6 | 5.39917 | 2.37008 | 10 |
| -6 | 16  | -6 | 6.24389 | 2.31873 | 12 |
| -7 | 17  | 6  | 1.94770 | 0.55630 | 6  |
| 7  | 17  | -6 | -0.5198 | 2.46816 | 10 |
| -7 | 17  | 6  | 1.55248 | 0.90783 | 9  |
| 6  | 17  | -6 | 41.7019 | 5.30080 | 10 |
| -5 | -17 | 6  | 84.1887 | 7.62217 | 13 |
| 5  | 17  | -6 | 89.6032 | 8.86209 | 10 |
| -4 | -17 | 6  | 30.4383 | 4.89616 | 13 |
| 4  | 17  | -6 | 32.6096 | 5.45866 | 10 |
| 3  | -17 | -6 | 21.9878 | 3.52155 | 13 |
| -3 | -17 | 6  | 19.7292 | 3.84249 | 13 |
| 3  | 17  | -6 | 24.7110 | 4.81418 | 10 |
| -3 | 17  | 6  | 20.9257 | 3.61248 | 10 |
| 2  | -17 | -6 | 41.8318 | 5.25272 | 13 |
| -2 | -17 | 6  | 34.1870 | 5.00092 | 13 |
| -2 | 17  | 6  | 33.1627 | 4.60144 | 10 |
| 2  | 17  | -6 | 39.8948 | 4.79630 | 10 |
| 1  | 17  | -6 | 11.9322 | 2.95767 | 14 |
| -1 | 17  | 6  | 11.3868 | 3.31448 | 10 |
| 1  | 17  | -6 | 15.0375 | 2.70544 | 11 |
| 0  | -17 | -6 | 6.87502 | 2.64605 | 13 |
| 0  | 17  | -6 | 9.15153 | 3.01884 | 14 |
| 0  | 17  | -6 | 10.4126 | 1.74178 | 11 |
| 0  | 17  | 6  | 13.3968 | 4.16151 | 10 |
| -1 | -17 | -6 | 216.184 | 15.6869 | 13 |
| -1 | 17  | -6 | 237.250 | 16.0329 | 14 |
| 1  | 17  | 6  | 236.340 | 17.0383 | 10 |
| -1 | 17  | -6 | 237.728 | 14.5860 | 9  |
| -2 | 17  | -6 | 27.4008 | 4.36629 | 12 |
| -2 | 17  | -6 | 30.5523 | 2.67495 | 9  |
| -2 | 17  | -6 | 31.3695 | 4.98740 | 14 |
| -2 | 17  | -6 | 31.8840 | 2.14312 | 6  |
| -3 | -17 | -6 | 1.28009 | 4.32794 | 1  |
| -3 | 17  | -6 | 3.87254 | 2.95021 | 14 |
| -3 | 17  | -6 | 6.53906 | 1.05276 | 9  |
| -3 | 17  | -6 | 5.93790 | 2.69776 | 12 |
| 3  | 17  | 6  | -1.5996 | 3.79237 | 10 |
| -3 | 17  | -6 | 4.22466 | 0.61228 | 6  |
| -3 | 17  | -6 | 5.64042 | 0.59805 | 6  |
| -4 | -17 | -6 | 66.6404 | 7.27476 | 10 |
| -4 | 17  | -6 | 80.1443 | 6.89263 | 12 |
| -5 | -17 | -6 | 3.42995 | 2.09831 | 10 |
| -5 | 17  | -6 | 3.57875 | 2.61692 | 12 |
| -6 | -17 | -6 | 32.3803 | 3.86648 | 10 |

|    |     |    |         |         |    |
|----|-----|----|---------|---------|----|
| -6 | 17  | -6 | 34.0815 | 3.31752 | 12 |
| -7 | 18  | 6  | 9.71117 | 1.19175 | 9  |
| 7  | 18  | -6 | 9.49871 | 3.47350 | 10 |
| 6  | 18  | -6 | 0.46017 | 3.69130 | 10 |
| -5 | -18 | 6  | 60.3502 | 6.03345 | 13 |
| 5  | 18  | -6 | 64.1274 | 7.18770 | 10 |
| -4 | -18 | 6  | 278.062 | 19.3468 | 13 |
| 4  | 18  | -6 | 292.860 | 20.0433 | 10 |
| -4 | 18  | 6  | 284.431 | 17.9343 | 11 |
| -4 | 18  | 6  | 304.801 | 18.0803 | 11 |
| 3  | -18 | -6 | 23.2870 | 3.56266 | 13 |
| -3 | -18 | 6  | 16.4984 | 3.28852 | 13 |
| -3 | 18  | 6  | 25.6813 | 2.80696 | 11 |
| 3  | 18  | -6 | 20.2463 | 3.89325 | 10 |
| -2 | -18 | 6  | 51.5234 | 5.87671 | 13 |
| 2  | -18 | -6 | 62.7321 | 6.25342 | 13 |
| 2  | 18  | -6 | 52.6869 | 6.07473 | 10 |
| -2 | 18  | 6  | 62.5687 | 5.74159 | 10 |
| -1 | -18 | 6  | 54.9184 | 5.74771 | 13 |
| 1  | 18  | -6 | 51.3410 | 5.55834 | 14 |
| 1  | 18  | -6 | 48.0949 | 4.95577 | 11 |
| 0  | -18 | -6 | 57.0397 | 5.77982 | 13 |
| 0  | 18  | -6 | 54.3204 | 4.20209 | 11 |
| 0  | 18  | 6  | 63.1468 | 6.85040 | 10 |
| 0  | 18  | -6 | 60.8744 | 6.09299 | 14 |
| 0  | 18  | -6 | 54.6215 | 4.24332 | 11 |
| -1 | -18 | -6 | 105.456 | 8.27186 | 13 |
| 1  | 18  | 6  | 110.342 | 9.43131 | 10 |
| -1 | 18  | -6 | 90.1204 | 6.53756 | 9  |
| -1 | 18  | -6 | 79.4509 | 7.85315 | 14 |
| -2 | -18 | -6 | 111.959 | 7.89458 | 13 |
| -2 | 18  | -6 | 91.9869 | 6.18039 | 6  |
| -2 | 18  | -6 | 95.9866 | 8.34248 | 14 |
| -2 | 18  | -6 | 96.0185 | 6.55021 | 9  |
| 3  | 18  | 6  | 25.8691 | 5.25750 | 10 |
| -3 | 18  | -6 | 21.8633 | 4.41336 | 14 |
| -3 | 18  | -6 | 21.5531 | 1.61068 | 6  |
| -3 | 18  | -6 | 26.0289 | 2.08502 | 9  |
| -3 | 18  | -6 | 20.6729 | 3.59181 | 12 |
| -4 | -18 | -6 | 9.21493 | 2.66916 | 10 |
| -4 | 18  | -6 | 8.36341 | 2.83811 | 12 |
| 4  | 18  | 6  | 9.09317 | 3.25355 | 10 |
| -5 | -18 | -6 | 8.05057 | 2.25172 | 10 |
| -5 | 18  | -6 | 12.6230 | 2.68654 | 12 |
| 7  | 19  | -6 | 2.36530 | 2.12529 | 10 |
| 6  | 19  | -6 | 17.2879 | 4.01934 | 10 |
| -5 | -19 | 6  | 54.3020 | 5.70896 | 13 |
| 5  | 19  | -6 | 58.2504 | 6.67535 | 10 |
| -4 | -19 | 6  | 54.5496 | 6.11477 | 13 |
| -4 | 19  | 6  | 53.2075 | 3.50464 | 11 |

|    |     |    |         |         |    |
|----|-----|----|---------|---------|----|
| -4 | 19  | 6  | 53.9502 | 3.51451 | 11 |
| 4  | 19  | -6 | 47.7096 | 6.51612 | 10 |
| -3 | -19 | 6  | 43.2269 | 5.31639 | 13 |
| 3  | -19 | -6 | 43.2294 | 4.85017 | 13 |
| -3 | 19  | 6  | 31.9485 | 3.37770 | 11 |
| 3  | 19  | -6 | 42.3164 | 5.27930 | 10 |
| 2  | -19 | -6 | 18.6063 | 3.52722 | 13 |
| -2 | -19 | 6  | 25.4662 | 4.44334 | 13 |
| -2 | 19  | 6  | 15.8722 | 3.01745 | 10 |
| 2  | 19  | -6 | 24.3615 | 3.90478 | 10 |
| 1  | -19 | -6 | 53.1876 | 5.78183 | 13 |
| -1 | -19 | 6  | 60.2587 | 5.91370 | 13 |
| -1 | 19  | 6  | 53.0549 | 6.03601 | 10 |
| 1  | 19  | -6 | 66.0085 | 5.17654 | 11 |
| 0  | -19 | -6 | 16.1196 | 3.47215 | 13 |
| 0  | 19  | 6  | 11.8297 | 3.50365 | 10 |
| 0  | 19  | -6 | 13.7729 | 1.69280 | 11 |
| 0  | 19  | -6 | 12.1513 | 3.07016 | 14 |
| 0  | 19  | -6 | 13.7218 | 1.70329 | 11 |
| -1 | -19 | -6 | 52.5873 | 6.44566 | 13 |
| -1 | 19  | -6 | 68.3203 | 4.49866 | 9  |
| 1  | 19  | 6  | 47.4568 | 6.98405 | 10 |
| -1 | 19  | -6 | 65.8616 | 6.40276 | 14 |
| -2 | -19 | -6 | 52.6873 | 6.51573 | 13 |
| -2 | 19  | -6 | 67.8854 | 4.16553 | 6  |
| -2 | 19  | -6 | 66.8895 | 4.64366 | 9  |
| 2  | 19  | 6  | 59.0090 | 7.68006 | 10 |
| -2 | 19  | -6 | 73.5427 | 7.02268 | 14 |
| -3 | 19  | -6 | 28.4044 | 1.87950 | 6  |
| 3  | 19  | 6  | 21.2556 | 4.98635 | 10 |
| -3 | 19  | -6 | 29.2234 | 1.86806 | 6  |
| -4 | 19  | -6 | -0.2002 | 2.51158 | 12 |
| 4  | 19  | 6  | 4.98398 | 2.78718 | 10 |
| -5 | -19 | -6 | 5.48806 | 2.34041 | 10 |
| -6 | 20  | 6  | 19.3822 | 1.92670 | 9  |
| 6  | 20  | -6 | 31.3331 | 4.82895 | 10 |
| -5 | -20 | 6  | 10.5308 | 3.24559 | 13 |
| 5  | 20  | -6 | 7.37763 | 3.50921 | 10 |
| -4 | -20 | 6  | -0.3950 | 2.59229 | 13 |
| 4  | 20  | -6 | -1.1190 | 2.87225 | 10 |
| 3  | -20 | -6 | 79.2549 | 7.56949 | 13 |
| -3 | -20 | 6  | 83.4006 | 7.58027 | 13 |
| 3  | 20  | -6 | 78.6037 | 7.43228 | 10 |
| -3 | 20  | 6  | 84.6685 | 5.80941 | 11 |
| 2  | -20 | -6 | 66.9089 | 6.35505 | 13 |
| -2 | -20 | 6  | 66.8899 | 7.15870 | 13 |
| 2  | 20  | -6 | 64.3448 | 5.95092 | 10 |
| -2 | 20  | 6  | 68.1716 | 5.87226 | 10 |
| -1 | -20 | 6  | 47.9239 | 6.15214 | 13 |
| 1  | -20 | -6 | 63.6811 | 5.92572 | 13 |

|    |     |    |         |         |    |
|----|-----|----|---------|---------|----|
| -1 | 20  | 6  | 63.6168 | 6.03484 | 10 |
| 1  | 20  | -6 | 54.2040 | 4.83391 | 11 |
| 0  | -20 | -6 | 11.7531 | 2.94576 | 13 |
| 0  | 20  | 6  | 18.4266 | 3.83611 | 10 |
| -1 | -20 | -6 | 25.6845 | 4.58426 | 13 |
| -1 | 20  | -6 | 20.2343 | 2.47122 | 9  |
| 1  | 20  | 6  | 29.3845 | 4.90620 | 10 |
| -2 | 20  | -6 | 36.5684 | 2.92278 | 9  |
| -2 | 20  | -6 | 31.0751 | 2.24750 | 6  |
| -3 | 20  | -6 | 13.7254 | 2.96297 | 12 |
| -3 | 20  | -6 | 13.1372 | 1.30791 | 9  |
| 3  | 20  | 6  | 9.82348 | 3.35556 | 10 |
| 4  | 20  | 6  | 11.2464 | 3.66827 | 10 |
| 6  | 21  | -6 | 13.9791 | 3.30425 | 10 |
| -5 | -21 | 6  | 2.17452 | 2.56502 | 13 |
| 5  | 21  | -6 | 1.72675 | 2.03324 | 10 |
| -4 | -21 | 6  | 13.3342 | 3.05767 | 13 |
| 4  | -21 | -6 | 13.9713 | 3.17947 | 13 |
| 4  | 21  | -6 | 8.43154 | 3.13340 | 10 |
| -3 | -21 | 6  | -1.3504 | 2.56634 | 13 |
| 3  | -21 | -6 | 0.31534 | 2.28234 | 13 |
| -3 | 21  | 6  | 0.30351 | 0.89236 | 11 |
| -3 | 21  | 6  | 0.86209 | 0.89925 | 11 |
| -2 | -21 | 6  | 14.9659 | 3.10568 | 13 |
| 2  | -21 | -6 | 13.1001 | 2.82599 | 13 |
| -2 | 21  | 6  | 13.4600 | 2.00453 | 11 |
| 2  | 21  | -6 | 15.8742 | 2.79039 | 11 |
| 1  | -21 | -6 | 18.4927 | 3.27907 | 13 |
| -1 | -21 | 6  | 11.5391 | 3.33343 | 13 |
| -1 | 21  | 6  | 20.4766 | 3.63762 | 10 |
| 1  | 21  | -6 | 18.6127 | 2.37343 | 11 |
| 1  | 21  | -6 | 28.4764 | 2.96723 | 11 |
| 0  | -21 | -6 | 33.3302 | 4.84701 | 13 |
| 0  | 21  | 6  | 31.5393 | 5.03829 | 10 |
| -1 | -21 | -6 | 2.93607 | 2.60312 | 13 |
| 1  | 21  | 6  | -2.6511 | 2.93718 | 10 |
| -1 | 21  | -6 | 0.15022 | 1.15553 | 9  |
| 2  | 21  | 6  | 9.22493 | 2.86838 | 10 |
| -2 | 21  | -6 | 7.44642 | 1.14821 | 9  |
| -2 | 21  | -6 | 6.55663 | 0.74319 | 6  |
| 3  | 21  | 6  | 3.56765 | 3.33657 | 10 |
| 4  | 21  | 6  | 7.87601 | 2.51623 | 10 |
| 6  | 22  | -6 | 3.58801 | 2.34901 | 10 |
| -5 | -22 | 6  | 7.39408 | 2.45191 | 13 |
| 5  | 22  | -6 | 7.75114 | 2.76008 | 10 |
| -4 | -22 | 6  | 10.4292 | 2.60107 | 13 |
| 4  | -22 | -6 | 5.77185 | 2.27216 | 13 |
| 4  | 22  | -6 | 5.89774 | 2.61491 | 10 |
| -3 | -22 | 6  | 2.64010 | 2.60141 | 13 |
| 3  | -22 | -6 | 3.26150 | 2.11790 | 13 |



|    |     |    |         |         |    |
|----|-----|----|---------|---------|----|
| 2  | -22 | -6 | 1.80225 | 2.24640 | 13 |
| -2 | -22 | 6  | 1.79312 | 2.75931 | 13 |
| 2  | 22  | -6 | 0.39121 | 1.57890 | 11 |
| -2 | 22  | 6  | 2.08670 | 1.17179 | 11 |
| -1 | -22 | 6  | 134.373 | 9.47205 | 13 |
| 1  | -22 | -6 | 120.034 | 9.38291 | 13 |
| -1 | 22  | 6  | 105.719 | 9.01427 | 10 |
| 1  | 22  | -6 | 132.144 | 7.75081 | 11 |
| 1  | 22  | -6 | 129.603 | 7.74390 | 11 |
| 0  | -22 | -6 | 42.5924 | 4.97080 | 13 |
| 0  | 22  | 6  | 36.3715 | 4.87531 | 10 |
| -1 | -22 | -6 | 15.6401 | 2.93620 | 13 |
| -1 | 22  | -6 | 10.8955 | 1.66161 | 9  |
| 1  | 22  | 6  | 15.0789 | 3.49303 | 10 |
| -2 | 22  | -6 | 8.48009 | 0.80774 | 6  |
| -2 | 22  | -6 | 6.89365 | 1.17188 | 9  |
| 2  | 22  | 6  | 3.97938 | 3.21859 | 10 |
| 3  | 22  | 6  | 9.08646 | 2.71513 | 10 |
| 4  | 22  | 6  | 4.79770 | 2.05387 | 10 |
| 5  | 23  | -6 | 21.1278 | 3.22212 | 10 |
| -4 | -23 | 6  | 1.92461 | 1.97761 | 13 |
| 4  | -23 | -6 | 2.87150 | 2.20992 | 13 |
| 4  | 23  | -6 | 0.91396 | 2.20510 | 10 |
| 3  | -23 | -6 | -1.7053 | 1.87490 | 13 |
| -3 | -23 | 6  | 0.04516 | 2.08372 | 13 |
| 3  | 23  | -6 | -1.4032 | 1.58724 | 11 |
| -2 | -23 | 6  | 13.0707 | 2.92517 | 13 |
| 2  | -23 | -6 | 20.1126 | 3.33220 | 13 |
| 2  | 23  | -6 | 12.2054 | 1.82147 | 11 |
| -2 | 23  | 6  | 17.3544 | 1.93259 | 11 |
| -1 | -23 | 6  | 19.6575 | 3.32095 | 13 |
| 1  | -23 | -6 | 28.2447 | 4.47817 | 13 |
| -1 | 23  | 6  | 27.0382 | 3.16240 | 11 |
| 0  | -23 | -6 | 30.5029 | 4.68605 | 13 |
| 0  | 23  | 6  | 30.5297 | 4.03248 | 10 |
| -1 | -23 | -6 | 1.69475 | 2.10592 | 13 |
| -1 | 23  | -6 | 1.87978 | 0.61011 | 6  |
| 1  | 23  | 6  | 1.12650 | 1.79032 | 10 |
| -1 | 23  | -6 | 0.51446 | 1.06734 | 9  |
| -2 | 23  | -6 | 11.9821 | 1.28443 | 6  |
| -2 | 23  | -6 | 17.0275 | 1.60256 | 9  |
| -2 | 23  | -6 | 16.3711 | 1.16500 | 6  |
| 2  | 23  | 6  | 16.5515 | 3.12777 | 10 |
| 3  | 23  | 6  | 0.72948 | 2.46744 | 10 |
| -4 | -24 | 6  | 3.10892 | 1.77142 | 13 |
| 4  | -24 | -6 | 4.59554 | 1.67081 | 13 |
| 4  | 24  | -6 | 2.26500 | 1.70643 | 11 |
| -3 | -24 | 6  | 12.8120 | 2.50224 | 13 |
| 3  | -24 | -6 | 16.3453 | 3.00425 | 13 |
| 3  | 24  | -6 | 9.48298 | 1.52600 | 11 |

|    |     |    |         |         |    |
|----|-----|----|---------|---------|----|
| 2  | -24 | -6 | 5.44756 | 2.15955 | 13 |
| -1 | -24 | 6  | 20.1349 | 3.25515 | 13 |
| 1  | -24 | -6 | 18.8185 | 3.24507 | 13 |
| -1 | 24  | 6  | 19.5877 | 2.58757 | 11 |
| 0  | -24 | -6 | 8.58974 | 2.41375 | 13 |
| 0  | 24  | 6  | 9.94510 | 2.44564 | 10 |
| -1 | -24 | -6 | 5.67380 | 1.94823 | 13 |
| 1  | 24  | 6  | 5.00028 | 2.23703 | 10 |
| -1 | 24  | -6 | 3.42804 | 1.18717 | 9  |
| 2  | 24  | 6  | 29.2238 | 3.93136 | 10 |
| -2 | 24  | -6 | 28.9117 | 2.11905 | 9  |
| -3 | -25 | 6  | 7.63005 | 1.91726 | 13 |
| 3  | -25 | -6 | 5.40547 | 2.03921 | 13 |
| 2  | -25 | -6 | 28.1036 | 3.47074 | 13 |
| -2 | -25 | 6  | 27.7970 | 3.53288 | 13 |
| -1 | -25 | 6  | 2.87958 | 1.70569 | 13 |
| 1  | -25 | -6 | -0.7091 | 1.69065 | 13 |
| -1 | 25  | 6  | 0.18827 | 0.72745 | 11 |
| -1 | 25  | 6  | 0.39297 | 0.72591 | 11 |
| 0  | -25 | -6 | 2.74921 | 2.15832 | 13 |
| 0  | 25  | 6  | 4.27842 | 1.17089 | 11 |
| -1 | -25 | -6 | 6.91648 | 2.03585 | 13 |
| 1  | 25  | 6  | 6.46773 | 2.02017 | 10 |
| 2  | -26 | -6 | 5.55636 | 1.68450 | 13 |
| -2 | -26 | 6  | 1.70171 | 1.50363 | 13 |
| 1  | -26 | -6 | 10.6411 | 2.02274 | 13 |
| -1 | -26 | 6  | 13.1061 | 2.21127 | 13 |
| 0  | -26 | -6 | 2.25538 | 1.52420 | 13 |
| 0  | 26  | 6  | 2.15604 | 0.88308 | 11 |
| 10 | 0   | -7 | 3.13088 | 2.68363 | 13 |
| -9 | 0   | 7  | 49.9874 | 3.88686 | 11 |
| 9  | 0   | -7 | 55.4944 | 6.73677 | 13 |
| 9  | 0   | -7 | 38.8352 | 6.94082 | 13 |
| -8 | 0   | 7  | 59.7908 | 6.07785 | 10 |
| 8  | 0   | -7 | 79.3503 | 7.86687 | 13 |
| -7 | 0   | 7  | 10.3001 | 3.18203 | 10 |
| 7  | 0   | -7 | 5.53134 | 3.16686 | 13 |
| -6 | 0   | 7  | 54.9883 | 6.54232 | 10 |
| -6 | 0   | 7  | 48.1421 | 7.20811 | 1  |
| -5 | 0   | 7  | 29.0398 | 5.49751 | 1  |
| -4 | 0   | 7  | 96.4738 | 9.50320 | 5  |
| -4 | 0   | 7  | 99.8283 | 9.39424 | 1  |
| -3 | 0   | 7  | 77.6785 | 8.12847 | 1  |
| -3 | 0   | 7  | 83.5024 | 8.73233 | 5  |
| -2 | 0   | 7  | 132.315 | 11.4178 | 1  |
| 1  | 0   | -7 | 69.0150 | 6.67683 | 5  |
| 0  | 0   | -7 | 63.7976 | 5.90008 | 5  |
| -1 | 0   | -7 | 1.30423 | 1.03276 | 5  |
| -2 | 0   | -7 | 68.4611 | 6.30788 | 1  |
| -2 | 0   | -7 | 71.3325 | 5.70254 | 4  |

|    |    |    |         |         |    |
|----|----|----|---------|---------|----|
| -3 | 0  | -7 | 15.2298 | 2.16502 | 8  |
| -3 | 0  | -7 | 15.3161 | 2.53255 | 4  |
| -4 | 0  | -7 | 95.8203 | 6.92596 | 8  |
| -5 | 0  | -7 | 1.41840 | 1.57625 | 8  |
| -6 | 0  | -7 | 136.977 | 9.22483 | 8  |
| 7  | 0  | 7  | 0.55229 | 3.23352 | 13 |
| -7 | 0  | -7 | 3.09539 | 1.06866 | 8  |
| 8  | 0  | 7  | 2.87049 | 2.20073 | 13 |
| 10 | -1 | -7 | 30.4551 | 4.62033 | 13 |
| 10 | 1  | -7 | 24.0942 | 4.52822 | 13 |
| -9 | -1 | 7  | 28.8690 | 3.81121 | 10 |
| 9  | -1 | -7 | 40.5140 | 6.34244 | 13 |
| -9 | 1  | 7  | 29.8042 | 2.81809 | 11 |
| 9  | 1  | -7 | 32.9325 | 5.04838 | 13 |
| 9  | 1  | -7 | 27.1320 | 4.64888 | 13 |
| 8  | -1 | -7 | 149.516 | 11.6115 | 13 |
| -8 | -1 | 7  | 137.416 | 10.6327 | 10 |
| -8 | 1  | 7  | 151.154 | 10.6640 | 10 |
| 8  | 1  | -7 | 134.643 | 11.5677 | 13 |
| 7  | -1 | -7 | 118.308 | 10.7653 | 13 |
| -7 | -1 | 7  | 121.894 | 9.64447 | 10 |
| 7  | 1  | -7 | 130.662 | 10.6153 | 13 |
| -7 | 1  | 7  | 120.819 | 9.73546 | 10 |
| -6 | -1 | 7  | 72.7748 | 8.44326 | 1  |
| -6 | -1 | 7  | 76.8296 | 7.37387 | 10 |
| -5 | 1  | 7  | 46.7136 | 6.83788 | 1  |
| -4 | -1 | 7  | 114.773 | 10.7015 | 5  |
| -4 | -1 | 7  | 119.768 | 10.4833 | 1  |
| -4 | 1  | 7  | 110.437 | 10.3385 | 1  |
| -4 | 1  | 7  | 109.918 | 10.3241 | 5  |
| -3 | -1 | 7  | 114.314 | 11.0671 | 1  |
| -3 | 1  | 7  | 147.874 | 12.2848 | 5  |
| -3 | 1  | 7  | 143.206 | 11.6689 | 1  |
| -2 | -1 | 7  | 172.770 | 13.2781 | 1  |
| -2 | 1  | 7  | 160.735 | 13.0879 | 1  |
| 1  | -1 | -7 | 313.745 | 20.9749 | 5  |
| 1  | 1  | -7 | 300.621 | 20.7121 | 5  |
| 0  | -1 | -7 | 35.4385 | 4.24683 | 5  |
| 0  | 1  | -7 | 32.7772 | 3.80562 | 5  |
| -1 | -1 | -7 | 78.6076 | 5.85327 | 5  |
| -1 | 1  | -7 | 56.1464 | 5.50595 | 4  |
| -2 | -1 | -7 | 14.9310 | 3.15731 | 1  |
| -2 | 1  | -7 | 11.7460 | 2.42865 | 1  |
| -2 | 1  | -7 | 10.4098 | 2.12486 | 4  |
| -3 | -1 | -7 | 4.06943 | 2.12960 | 4  |
| -3 | -1 | -7 | 4.87371 | 2.17636 | 1  |
| -3 | -1 | -7 | 5.90358 | 1.70833 | 8  |
| -3 | 1  | -7 | 4.68237 | 1.63431 | 4  |
| -3 | 1  | -7 | 4.70916 | 1.50218 | 8  |
| -4 | 1  | -7 | 13.9550 | 2.27461 | 8  |

|    |    |    |         |         |    |
|----|----|----|---------|---------|----|
| -5 | -1 | -7 | 9.03857 | 1.85332 | 8  |
| -5 | 1  | -7 | 8.66485 | 1.80282 | 8  |
| -5 | 1  | -7 | 10.9104 | 2.99190 | 12 |
| 5  | 1  | 7  | 6.86726 | 4.83120 | 13 |
| -6 | -1 | -7 | 39.5455 | 3.82462 | 8  |
| -6 | -1 | -7 | 34.3762 | 2.99458 | 11 |
| -6 | 1  | -7 | 34.5042 | 3.34149 | 8  |
| -7 | -1 | -7 | 7.17097 | 1.43488 | 8  |
| 7  | 1  | 7  | 6.70235 | 2.96971 | 13 |
| 8  | 1  | 7  | -1.0117 | 2.23961 | 13 |
| 10 | -2 | -7 | 62.4841 | 6.21514 | 13 |
| 10 | 2  | -7 | 69.2149 | 6.24708 | 13 |
| 9  | 2  | -7 | 7.85903 | 3.74390 | 13 |
| -9 | 2  | 7  | 5.51376 | 1.39747 | 11 |
| -8 | -2 | 7  | 49.9175 | 5.58911 | 10 |
| 8  | -2 | -7 | 44.6618 | 6.46765 | 13 |
| 8  | 2  | -7 | 54.6139 | 7.45631 | 13 |
| -8 | 2  | 7  | 49.4632 | 4.89460 | 10 |
| 7  | -2 | -7 | 255.876 | 19.7882 | 13 |
| -7 | -2 | 7  | 315.974 | 21.6426 | 1  |
| -7 | -2 | 7  | 308.670 | 19.7892 | 10 |
| -7 | 2  | 7  | 261.030 | 19.2398 | 10 |
| 7  | 2  | -7 | 313.785 | 19.9494 | 13 |
| -6 | -2 | 7  | 35.2767 | 7.12058 | 1  |
| -6 | -2 | 7  | 35.4438 | 4.77630 | 10 |
| -6 | 2  | 7  | 41.5017 | 4.59355 | 10 |
| -5 | -2 | 7  | 229.727 | 17.6910 | 1  |
| -4 | -2 | 7  | 231.322 | 15.7528 | 1  |
| 4  | -2 | -7 | 180.046 | 14.3881 | 2  |
| -4 | 2  | 7  | 175.620 | 14.4758 | 5  |
| -3 | -2 | 7  | 31.9848 | 5.32817 | 1  |
| -3 | 2  | 7  | 36.6740 | 5.46470 | 5  |
| -2 | -2 | 7  | 6.96082 | 3.53756 | 1  |
| 1  | -2 | -7 | 208.519 | 14.6522 | 5  |
| 1  | 2  | -7 | 190.459 | 13.9570 | 5  |
| 0  | -2 | -7 | 51.6784 | 5.47568 | 5  |
| 0  | 2  | -7 | 40.5433 | 4.04680 | 5  |
| -1 | -2 | -7 | 23.8273 | 3.35971 | 5  |
| -1 | 2  | -7 | 20.5741 | 2.69216 | 4  |
| -2 | -2 | -7 | 40.2722 | 5.35528 | 1  |
| -2 | 2  | -7 | 42.9682 | 4.16648 | 1  |
| -2 | 2  | -7 | 44.9381 | 4.03733 | 4  |
| -3 | -2 | -7 | 0.28198 | 2.13772 | 1  |
| -3 | -2 | -7 | 0.89425 | 1.30004 | 8  |
| -3 | 2  | -7 | 1.53843 | 1.16565 | 4  |
| -3 | 2  | -7 | 1.27002 | 1.29434 | 8  |
| -4 | -2 | -7 | 36.3453 | 3.82491 | 8  |
| -4 | -2 | -7 | 48.9357 | 4.91435 | 10 |
| -4 | 2  | -7 | 42.9567 | 3.76709 | 8  |
| -5 | -2 | -7 | 62.2711 | 5.23374 | 8  |

|    |    |    |         |         |    |
|----|----|----|---------|---------|----|
| -5 | -2 | -7 | 62.2889 | 5.56330 | 10 |
| 5  | 2  | 7  | 57.7673 | 8.03842 | 13 |
| -5 | 2  | -7 | 69.1666 | 4.45372 | 11 |
| -5 | 2  | -7 | 72.7963 | 6.40997 | 12 |
| -5 | 2  | -7 | 69.2414 | 5.02363 | 8  |
| -6 | -2 | -7 | 17.6395 | 2.59925 | 8  |
| -6 | 2  | -7 | 18.3884 | 2.28517 | 8  |
| 6  | 2  | 7  | 11.3167 | 4.52345 | 13 |
| -7 | -2 | -7 | 78.9671 | 5.51834 | 8  |
| 7  | 2  | 7  | 78.8151 | 7.50794 | 13 |
| 8  | 2  | 7  | 2.25655 | 2.42687 | 13 |
| 10 | -3 | -7 | 29.6702 | 5.13839 | 13 |
| 10 | 3  | -7 | 28.8595 | 4.51713 | 13 |
| 9  | -3 | -7 | 35.4297 | 6.26825 | 13 |
| -9 | -3 | 7  | 39.6439 | 4.71320 | 10 |
| 9  | 3  | -7 | 49.6942 | 6.54348 | 13 |
| -9 | 3  | 7  | 40.1689 | 3.21861 | 11 |
| -8 | -3 | 7  | 7.96177 | 3.10848 | 10 |
| 8  | 3  | -7 | 18.2612 | 5.11525 | 13 |
| 7  | -3 | -7 | 85.6332 | 7.73038 | 13 |
| -7 | -3 | 7  | 62.0590 | 7.04671 | 10 |
| -7 | -3 | 7  | 66.8224 | 8.33924 | 1  |
| 7  | 3  | -7 | 63.2495 | 7.32864 | 13 |
| -7 | 3  | 7  | 81.9001 | 6.79237 | 10 |
| -6 | -3 | 7  | 139.635 | 12.0254 | 1  |
| -6 | -3 | 7  | 126.223 | 9.82037 | 10 |
| -6 | 3  | 7  | 109.822 | 9.53538 | 10 |
| 5  | -3 | -7 | 73.3462 | 7.99317 | 2  |
| -5 | -3 | 7  | 73.4897 | 8.94953 | 1  |
| 4  | -3 | -7 | 89.0731 | 8.35005 | 2  |
| -4 | -3 | 7  | 76.5995 | 8.68217 | 1  |
| -4 | 3  | 7  | 87.8578 | 7.71422 | 5  |
| 3  | -3 | -7 | 2.64543 | 1.97481 | 2  |
| -3 | -3 | 7  | 5.66220 | 2.99274 | 1  |
| -3 | 3  | 7  | 3.41804 | 2.52430 | 5  |
| 2  | -3 | -7 | 8.43009 | 2.59533 | 2  |
| -2 | 3  | 7  | 9.84244 | 3.46792 | 5  |
| 1  | 3  | -7 | 10.5007 | 2.58116 | 5  |
| 0  | -3 | -7 | 112.242 | 10.1226 | 5  |
| 0  | 3  | -7 | 136.985 | 9.05815 | 4  |
| 0  | 3  | -7 | 131.143 | 8.40419 | 5  |
| 0  | 3  | -7 | 131.842 | 8.55099 | 5  |
| -1 | -3 | -7 | 25.8251 | 3.74904 | 5  |
| -1 | 3  | -7 | 20.6318 | 2.83388 | 4  |
| -2 | -3 | -7 | 14.5224 | 2.36650 | 5  |
| -2 | -3 | -7 | 15.8853 | 3.43371 | 1  |
| -2 | 3  | -7 | 10.8035 | 1.96673 | 4  |
| -3 | -3 | -7 | 91.6195 | 6.41478 | 8  |
| -3 | -3 | -7 | 94.7148 | 8.06325 | 1  |
| -3 | 3  | -7 | 77.1646 | 5.97576 | 4  |

|    |    |    |         |         |    |
|----|----|----|---------|---------|----|
| -3 | 3  | -7 | 80.5642 | 5.98448 | 8  |
| -4 | -3 | -7 | 25.6280 | 4.03485 | 10 |
| -4 | -3 | -7 | 20.5251 | 2.79582 | 8  |
| -4 | 3  | -7 | 16.0625 | 2.48667 | 8  |
| -5 | -3 | -7 | 0.11770 | 1.96635 | 10 |
| -5 | -3 | -7 | 0.65243 | 1.97878 | 8  |
| -5 | 3  | -7 | -0.1124 | 2.60002 | 12 |
| -5 | 3  | -7 | 0.05001 | 1.16865 | 8  |
| 5  | 3  | 7  | -0.8581 | 3.28438 | 13 |
| -6 | -3 | -7 | 1.43939 | 1.61724 | 8  |
| -6 | 3  | -7 | 0.20965 | 1.07726 | 8  |
| 6  | 3  | 7  | 1.93503 | 3.30423 | 13 |
| 7  | 3  | 7  | 13.0351 | 3.44505 | 13 |
| 8  | 3  | 7  | -0.0412 | 2.40633 | 13 |
| 10 | -4 | -7 | 1.99417 | 2.37712 | 13 |
| 10 | 4  | -7 | 1.43907 | 2.44702 | 13 |
| 9  | -4 | -7 | 18.4863 | 3.81333 | 13 |
| -9 | -4 | 7  | 20.0648 | 3.38437 | 10 |
| -9 | 4  | 7  | 17.9981 | 1.72537 | 11 |
| -9 | 4  | 7  | 18.8068 | 3.06750 | 7  |
| 9  | 4  | -7 | 21.1064 | 4.19874 | 13 |
| -8 | -4 | 7  | 49.8654 | 5.71343 | 10 |
| 8  | -4 | -7 | 49.6563 | 7.34098 | 13 |
| -8 | 4  | 7  | 47.7705 | 4.19047 | 11 |
| 8  | 4  | -7 | 53.2205 | 7.42166 | 13 |
| 8  | 4  | -7 | 47.3986 | 6.85319 | 13 |
| -7 | -4 | 7  | 24.2715 | 4.35407 | 10 |
| -7 | -4 | 7  | 27.2198 | 6.15952 | 1  |
| 7  | 4  | -7 | 20.6447 | 4.24694 | 13 |
| -6 | -4 | 7  | 169.093 | 12.8519 | 10 |
| 6  | -4 | -7 | 165.070 | 14.5496 | 2  |
| -6 | -4 | 7  | 179.949 | 14.7401 | 1  |
| -6 | 4  | 7  | 157.815 | 12.0894 | 10 |
| -5 | -4 | 7  | 13.3374 | 4.98151 | 1  |
| 4  | -4 | -7 | 89.8039 | 8.57597 | 2  |
| -4 | 4  | 7  | 91.9780 | 7.59560 | 5  |
| 3  | -4 | -7 | 353.153 | 23.3419 | 2  |
| -3 | -4 | 7  | 327.762 | 24.1456 | 1  |
| -3 | 4  | 7  | 345.753 | 23.6165 | 5  |
| 2  | -4 | -7 | 17.5863 | 3.37458 | 2  |
| -2 | 4  | 7  | 17.0532 | 4.28332 | 5  |
| 1  | -4 | -7 | 122.402 | 9.45821 | 2  |
| 1  | 4  | -7 | 115.661 | 8.87945 | 5  |
| 0  | -4 | -7 | 42.0258 | 4.97071 | 5  |
| 0  | 4  | -7 | 30.4164 | 3.34604 | 4  |
| -1 | -4 | -7 | 103.959 | 8.81017 | 1  |
| -1 | -4 | -7 | 92.4224 | 7.76475 | 5  |
| -1 | 4  | -7 | 76.2243 | 6.43373 | 4  |
| -2 | -4 | -7 | 52.8198 | 6.47106 | 1  |
| -2 | -4 | -7 | 54.5758 | 5.07991 | 5  |

|    |    |    |         |         |    |
|----|----|----|---------|---------|----|
| -2 | 4  | -7 | 42.2370 | 4.12037 | 3  |
| -2 | 4  | -7 | 45.0184 | 3.96233 | 4  |
| -3 | -4 | -7 | 5.95833 | 1.93169 | 8  |
| -3 | -4 | -7 | 3.03636 | 2.67512 | 1  |
| -3 | 4  | -7 | 3.66369 | 0.86378 | 4  |
| -3 | 4  | -7 | 4.23436 | 0.97921 | 4  |
| -3 | 4  | -7 | 4.50693 | 1.57045 | 3  |
| -3 | 4  | -7 | 3.72691 | 1.30652 | 8  |
| -4 | -4 | -7 | 30.4885 | 3.19622 | 8  |
| -4 | -4 | -7 | 30.3023 | 3.88735 | 10 |
| -4 | -4 | -7 | 32.0012 | 4.40958 | 1  |
| -4 | 4  | -7 | 22.4055 | 2.32556 | 11 |
| -4 | 4  | -7 | 27.1303 | 3.94446 | 12 |
| -4 | 4  | -7 | 23.7902 | 2.66183 | 8  |
| -5 | -4 | -7 | 82.3038 | 6.54756 | 10 |
| -5 | -4 | -7 | 81.8410 | 6.25213 | 8  |
| -5 | 4  | -7 | 65.8333 | 6.37802 | 12 |
| -5 | 4  | -7 | 69.1415 | 5.28702 | 8  |
| 5  | 4  | 7  | 84.0827 | 8.16281 | 13 |
| -6 | -4 | -7 | 9.27720 | 2.12204 | 8  |
| -6 | 4  | -7 | 10.8889 | 1.36466 | 9  |
| -6 | 4  | -7 | 9.60569 | 3.05681 | 12 |
| 6  | 4  | 7  | 6.06322 | 3.78168 | 13 |
| -7 | -4 | -7 | 13.2190 | 2.16673 | 8  |
| 7  | 4  | 7  | 12.3465 | 3.44323 | 13 |
| -7 | 4  | -7 | 13.9603 | 1.60668 | 9  |
| -7 | 4  | -7 | 12.8975 | 1.17901 | 6  |
| 8  | 4  | 7  | 7.54054 | 2.23605 | 13 |
| 10 | -5 | -7 | 13.5509 | 2.68840 | 13 |
| 10 | 5  | -7 | 10.6293 | 3.11365 | 13 |
| -9 | -5 | 7  | 31.5869 | 3.96746 | 10 |
| 9  | -5 | -7 | 29.4158 | 5.29373 | 13 |
| -9 | 5  | 7  | 34.4065 | 3.63841 | 7  |
| 9  | 5  | -7 | 28.0144 | 5.42166 | 13 |
| 8  | -5 | -7 | 76.6523 | 7.89411 | 13 |
| -8 | -5 | 7  | 84.8697 | 7.48063 | 10 |
| -8 | 5  | 7  | 72.2467 | 5.60532 | 11 |
| 8  | 5  | -7 | 85.6437 | 8.39364 | 13 |
| -7 | -5 | 7  | 155.352 | 12.0569 | 10 |
| -7 | -5 | 7  | 170.241 | 14.7670 | 1  |
| 7  | -5 | -7 | 162.965 | 11.7861 | 13 |
| -7 | 5  | 7  | 162.864 | 11.3838 | 10 |
| 7  | 5  | -7 | 145.049 | 12.1979 | 13 |
| -6 | -5 | 7  | 146.080 | 13.5213 | 1  |
| 6  | -5 | -7 | 169.449 | 13.8902 | 2  |
| -6 | -5 | 7  | 130.204 | 11.1920 | 10 |
| -6 | 5  | 7  | 145.905 | 10.6011 | 10 |
| -5 | -5 | 7  | 185.931 | 14.9980 | 1  |
| 5  | -5 | -7 | 150.565 | 13.7356 | 2  |
| -4 | -5 | 7  | 156.955 | 13.3626 | 1  |

|    |    |    |         |         |    |
|----|----|----|---------|---------|----|
| 4  | -5 | -7 | 153.127 | 12.3854 | 2  |
| -4 | 5  | 7  | 145.002 | 10.2252 | 5  |
| 3  | -5 | -7 | 3.43397 | 2.71365 | 2  |
| -3 | 5  | 7  | 2.40156 | 2.41935 | 5  |
| 2  | -5 | -7 | 121.447 | 9.76800 | 2  |
| -2 | 5  | 7  | 121.919 | 10.6957 | 5  |
| 1  | -5 | -7 | 70.9236 | 6.79807 | 2  |
| 1  | 5  | -7 | 68.4923 | 5.61805 | 5  |
| 0  | -5 | -7 | 51.4249 | 5.59314 | 2  |
| 0  | -5 | -7 | 53.8028 | 5.84972 | 5  |
| 0  | 5  | -7 | 40.0428 | 4.06577 | 4  |
| -1 | -5 | -7 | 38.4228 | 5.38335 | 1  |
| -1 | -5 | -7 | 38.3286 | 5.01724 | 5  |
| -1 | 5  | -7 | 35.3342 | 3.40883 | 4  |
| -1 | 5  | -7 | 50.7034 | 5.45110 | 3  |
| -2 | -5 | -7 | 66.4803 | 7.04417 | 1  |
| -2 | -5 | -7 | 59.4730 | 6.10033 | 5  |
| -2 | 5  | -7 | 61.4490 | 4.50432 | 4  |
| -2 | 5  | -7 | 59.0906 | 4.51567 | 4  |
| -2 | 5  | -7 | 63.3767 | 5.05625 | 3  |
| -3 | -5 | -7 | 27.2964 | 3.17403 | 8  |
| -3 | -5 | -7 | 30.5356 | 5.26709 | 1  |
| -3 | 5  | -7 | 30.0610 | 3.04386 | 3  |
| -3 | 5  | -7 | 25.1138 | 2.65958 | 8  |
| -4 | -5 | -7 | 25.1554 | 3.06905 | 8  |
| -4 | -5 | -7 | 25.5591 | 4.79570 | 1  |
| -4 | -5 | -7 | 19.0755 | 3.81342 | 10 |
| 4  | 5  | 7  | 25.1440 | 5.48289 | 13 |
| -4 | 5  | -7 | 21.2593 | 2.33347 | 8  |
| -4 | 5  | -7 | 27.4714 | 4.11086 | 12 |
| -4 | 5  | -7 | 23.0008 | 1.58114 | 11 |
| -4 | 5  | -7 | 21.6162 | 2.01400 | 9  |
| -5 | -5 | -7 | 3.83781 | 2.09784 | 10 |
| -5 | -5 | -7 | 4.28647 | 1.88937 | 8  |
| -5 | 5  | -7 | 4.75398 | 2.35665 | 12 |
| 5  | 5  | 7  | 7.20723 | 3.61374 | 13 |
| -5 | 5  | -7 | 7.71731 | 1.23524 | 9  |
| -6 | -5 | -7 | 78.5999 | 5.77749 | 8  |
| -6 | -5 | -7 | 67.6746 | 5.54180 | 10 |
| -6 | 5  | -7 | 69.3429 | 4.51485 | 6  |
| -6 | 5  | -7 | 68.9703 | 6.49558 | 12 |
| -6 | 5  | -7 | 65.1050 | 4.82537 | 9  |
| 6  | 5  | 7  | 70.9724 | 7.93735 | 13 |
| -7 | -5 | -7 | 4.56849 | 1.50738 | 8  |
| -7 | 5  | -7 | 2.48533 | 0.81790 | 9  |
| 7  | 5  | 7  | 5.87564 | 3.20323 | 13 |
| -7 | 5  | -7 | 2.98667 | 0.51223 | 6  |
| 10 | -6 | -7 | 3.13894 | 2.57523 | 13 |
| 10 | -6 | -7 | 3.21329 | 1.91275 | 13 |
| 9  | -6 | -7 | 4.92889 | 2.82439 | 13 |



|    |    |    |         |         |    |
|----|----|----|---------|---------|----|
| -9 | -6 | 7  | 2.84725 | 2.22328 | 10 |
| 9  | 6  | -7 | 2.76216 | 3.10724 | 13 |
| -9 | 6  | 7  | 5.22323 | 1.51100 | 7  |
| 8  | -6 | -7 | 77.5303 | 7.81282 | 13 |
| -8 | -6 | 7  | 70.8163 | 7.12601 | 10 |
| 8  | 6  | -7 | 73.0820 | 8.19489 | 13 |
| -8 | 6  | 7  | 75.2258 | 6.22804 | 7  |
| -8 | 6  | 7  | 78.1922 | 5.24624 | 11 |
| -7 | -6 | 7  | 33.4882 | 5.10026 | 10 |
| -7 | -6 | 7  | 37.2634 | 7.03260 | 1  |
| 7  | -6 | -7 | 36.7417 | 5.66725 | 13 |
| 7  | 6  | -7 | 35.5838 | 6.80729 | 13 |
| -7 | 6  | 7  | 32.0301 | 3.73861 | 10 |
| 7  | 6  | -7 | 34.0515 | 6.31437 | 13 |
| -6 | -6 | 7  | 120.425 | 10.3625 | 10 |
| 6  | -6 | -7 | 150.624 | 13.1478 | 2  |
| -6 | -6 | 7  | 132.251 | 12.9601 | 1  |
| -6 | 6  | 7  | 128.048 | 9.72872 | 10 |
| -5 | -6 | 7  | 403.704 | 29.4724 | 1  |
| 5  | -6 | -7 | 408.024 | 28.6500 | 2  |
| 4  | -6 | -7 | 220.549 | 16.4505 | 2  |
| -4 | -6 | 7  | 209.415 | 17.5733 | 1  |
| 3  | -6 | -7 | 142.894 | 11.5899 | 2  |
| -3 | 6  | 7  | 131.811 | 10.4613 | 5  |
| 2  | -6 | -7 | 38.8485 | 5.49655 | 2  |
| -2 | 6  | 7  | 42.9841 | 5.91965 | 5  |
| 1  | -6 | -7 | 54.4258 | 5.90767 | 2  |
| -1 | 6  | 7  | 56.0394 | 6.73702 | 5  |
| 0  | -6 | -7 | 168.515 | 12.9947 | 2  |
| 0  | 6  | -7 | 174.809 | 11.5169 | 4  |
| -1 | -6 | -7 | 45.6969 | 5.62228 | 2  |
| -1 | -6 | -7 | 42.7467 | 5.59864 | 5  |
| -1 | -6 | -7 | 46.6750 | 6.37436 | 1  |
| -1 | 6  | -7 | 45.8143 | 3.98640 | 3  |
| -1 | 6  | -7 | 45.1254 | 3.70650 | 4  |
| -2 | -6 | -7 | 285.976 | 21.1233 | 2  |
| -2 | -6 | -7 | 302.326 | 20.8328 | 5  |
| -2 | -6 | -7 | 293.608 | 21.3919 | 1  |
| -2 | 6  | -7 | 304.455 | 18.5196 | 4  |
| -2 | 6  | -7 | 313.703 | 19.2485 | 3  |
| -2 | 6  | -7 | 283.161 | 18.4516 | 4  |
| -3 | -6 | -7 | 138.724 | 9.26514 | 8  |
| -3 | -6 | -7 | 145.546 | 11.5218 | 1  |
| -3 | 6  | -7 | 122.897 | 8.27092 | 9  |
| -3 | 6  | -7 | 126.826 | 9.14083 | 3  |
| -3 | 6  | -7 | 124.130 | 8.51329 | 8  |
| -4 | -6 | -7 | 77.9470 | 8.51774 | 1  |
| -4 | -6 | -7 | 71.6453 | 6.44772 | 8  |
| -4 | -6 | -7 | 82.8663 | 7.57335 | 10 |
| -4 | 6  | -7 | 88.1565 | 5.68189 | 9  |

|    |    |    |         |         |    |
|----|----|----|---------|---------|----|
| -4 | 6  | -7 | 90.4223 | 5.81258 | 8  |
| 4  | 6  | 7  | 68.9090 | 8.26680 | 13 |
| -4 | 6  | -7 | 98.4224 | 7.36515 | 12 |
| -4 | 6  | -7 | 94.3632 | 5.52003 | 6  |
| -5 | -6 | -7 | 17.2826 | 3.36683 | 10 |
| -5 | -6 | -7 | 17.5739 | 2.79811 | 8  |
| -5 | 6  | -7 | 21.2513 | 2.15362 | 9  |
| -5 | 6  | -7 | 26.5622 | 3.79477 | 12 |
| -5 | 6  | -7 | 22.7440 | 1.71616 | 6  |
| 5  | 6  | 7  | 19.8678 | 4.91142 | 13 |
| -6 | -6 | -7 | 55.1982 | 4.92338 | 8  |
| -6 | -6 | -7 | 54.1290 | 4.83057 | 10 |
| -6 | 6  | -7 | 54.1295 | 3.85861 | 9  |
| 6  | 6  | 7  | 51.8766 | 7.10331 | 13 |
| -6 | 6  | -7 | 54.2059 | 3.58356 | 6  |
| -7 | -6 | -7 | 12.7161 | 2.08509 | 8  |
| -7 | 6  | -7 | 19.4678 | 1.69149 | 9  |
| 7  | 6  | 7  | 15.1857 | 3.65674 | 13 |
| -7 | 6  | -7 | 17.5122 | 1.27018 | 6  |
| -9 | -7 | 7  | 6.26362 | 2.48330 | 10 |
| 9  | -7 | -7 | 5.11296 | 2.72902 | 13 |
| -9 | 7  | 7  | 4.91962 | 1.44572 | 7  |
| 9  | 7  | -7 | 5.52141 | 3.12440 | 13 |
| 8  | -7 | -7 | 48.0048 | 7.11075 | 13 |
| -8 | 7  | 7  | 47.1134 | 4.28707 | 7  |
| -8 | 7  | 7  | 49.8537 | 3.54123 | 11 |
| 7  | -7 | -7 | 2.09657 | 2.91738 | 13 |
| -7 | -7 | 7  | 3.39351 | 3.84219 | 1  |
| -7 | -7 | 7  | 0.68196 | 2.46895 | 10 |
| -7 | 7  | 7  | 1.87725 | 1.13194 | 11 |
| 7  | 7  | -7 | 3.73240 | 3.20309 | 13 |
| -6 | -7 | 7  | 88.2491 | 8.06516 | 10 |
| -6 | -7 | 7  | 101.255 | 10.8272 | 1  |
| 6  | 7  | -7 | 72.8628 | 8.43487 | 13 |
| 6  | 7  | -7 | 79.6042 | 8.19749 | 13 |
| -5 | -7 | 7  | 148.517 | 14.6270 | 1  |
| 5  | -7 | -7 | 183.988 | 14.8439 | 2  |
| 4  | -7 | -7 | 172.380 | 13.1344 | 2  |
| -4 | -7 | 7  | 130.112 | 13.5760 | 1  |
| 3  | -7 | -7 | 365.911 | 24.7445 | 2  |
| -3 | 7  | 7  | 345.468 | 23.2359 | 5  |
| 2  | -7 | -7 | 221.047 | 16.2797 | 2  |
| -2 | 7  | 7  | 224.725 | 16.3313 | 5  |
| 1  | -7 | -7 | 430.263 | 28.7782 | 2  |
| -1 | 7  | 7  | 430.406 | 29.4046 | 5  |
| 0  | -7 | -7 | 66.4758 | 7.01430 | 2  |
| 0  | 7  | -7 | 63.0867 | 5.02211 | 4  |
| -1 | -7 | -7 | 18.2780 | 4.42493 | 1  |
| -1 | -7 | -7 | 16.8677 | 3.74600 | 2  |
| -1 | -7 | -7 | 18.6772 | 3.77449 | 5  |

|    |    |    |         |         |    |
|----|----|----|---------|---------|----|
| -1 | 7  | -7 | 14.0252 | 2.05215 | 3  |
| -1 | 7  | -7 | 12.6657 | 1.81897 | 4  |
| -2 | -7 | -7 | 350.475 | 23.8149 | 5  |
| -2 | -7 | -7 | 324.877 | 22.7972 | 2  |
| -2 | -7 | -7 | 337.487 | 23.2120 | 1  |
| -2 | 7  | -7 | 290.642 | 19.5320 | 4  |
| -2 | 7  | -7 | 320.382 | 19.5824 | 4  |
| -2 | 7  | -7 | 306.475 | 20.4852 | 3  |
| -3 | -7 | -7 | 310.911 | 21.8318 | 1  |
| -3 | -7 | -7 | 299.501 | 19.0761 | 8  |
| -3 | 7  | -7 | 288.428 | 18.2069 | 9  |
| -3 | 7  | -7 | 293.427 | 18.0933 | 6  |
| -3 | 7  | -7 | 293.581 | 18.3894 | 8  |
| -3 | 7  | -7 | 289.080 | 19.0477 | 3  |
| -4 | -7 | -7 | 14.5491 | 4.46478 | 1  |
| -4 | -7 | -7 | 13.6570 | 3.38974 | 10 |
| -4 | -7 | -7 | 10.2136 | 2.33608 | 8  |
| -4 | 7  | -7 | 17.9989 | 1.48493 | 6  |
| -4 | 7  | -7 | 14.3673 | 1.73296 | 9  |
| 4  | 7  | 7  | 9.56315 | 4.49729 | 13 |
| -4 | 7  | -7 | 19.0971 | 3.18800 | 12 |
| -5 | -7 | -7 | 74.7939 | 6.71379 | 8  |
| -5 | -7 | -7 | 79.3534 | 6.95496 | 10 |
| 5  | 7  | 7  | 77.9472 | 8.51193 | 13 |
| -5 | 7  | -7 | 86.7666 | 6.98939 | 12 |
| -5 | 7  | -7 | 85.1349 | 5.22345 | 6  |
| -5 | 7  | -7 | 82.5904 | 5.40447 | 9  |
| -6 | 7  | -7 | 21.0561 | 1.91578 | 9  |
| -7 | -7 | -7 | 5.27907 | 1.63913 | 8  |
| -7 | 7  | -7 | 4.42723 | 0.49276 | 6  |
| 7  | 7  | 7  | 4.50530 | 2.99985 | 13 |
| -7 | 7  | -7 | 6.72926 | 0.91217 | 9  |
| -7 | 7  | -7 | 5.47960 | 0.53041 | 6  |
| 9  | -8 | -7 | 9.98980 | 2.77137 | 13 |
| -9 | -8 | 7  | 7.09974 | 2.00335 | 10 |
| 9  | 8  | -7 | 3.19798 | 3.41450 | 13 |
| -9 | 8  | 7  | 7.43873 | 1.63355 | 7  |
| -8 | 8  | 7  | 35.3582 | 2.34029 | 11 |
| -8 | 8  | 7  | 29.1217 | 3.82593 | 7  |
| -7 | -8 | 7  | 50.3540 | 7.91416 | 1  |
| 7  | -8 | -7 | 33.8279 | 4.64702 | 13 |
| 7  | 8  | -7 | 51.2848 | 7.36185 | 13 |
| -7 | 8  | 7  | 30.3380 | 2.89029 | 11 |
| -7 | 8  | 7  | 32.6176 | 3.91009 | 7  |
| -6 | -8 | 7  | 384.432 | 25.9083 | 10 |
| 6  | -8 | -7 | 377.216 | 25.1019 | 13 |
| -6 | -8 | 7  | 419.153 | 29.2017 | 1  |
| -6 | 8  | 7  | 406.851 | 24.9887 | 10 |
| 6  | 8  | -7 | 355.111 | 26.5671 | 13 |
| 5  | -8 | -7 | 0.45602 | 3.16847 | 2  |

|    |    |    |         |         |    |
|----|----|----|---------|---------|----|
| -5 | -8 | 7  | 5.30322 | 4.04225 | 1  |
| 4  | -8 | -7 | 23.0518 | 5.27093 | 2  |
| 3  | -8 | -7 | 85.4855 | 8.97719 | 2  |
| 2  | -8 | -7 | 97.5885 | 8.98867 | 2  |
| -2 | 8  | 7  | 97.8479 | 8.60695 | 5  |
| 1  | -8 | -7 | 716.863 | 46.2846 | 2  |
| 0  | -8 | -7 | 37.9019 | 5.77395 | 2  |
| 0  | 8  | -7 | 40.6539 | 3.58425 | 4  |
| -1 | -8 | -7 | 619.991 | 38.6471 | 2  |
| -1 | -8 | -7 | 628.351 | 39.1719 | 1  |
| -1 | 8  | -7 | 571.856 | 35.8718 | 4  |
| -1 | 8  | -7 | 543.104 | 35.8610 | 4  |
| -1 | 8  | -7 | 560.327 | 35.8756 | 4  |
| -2 | -8 | -7 | 55.4929 | 7.25921 | 1  |
| -2 | -8 | -7 | 54.5428 | 6.66665 | 2  |
| -3 | -8 | -7 | 9.09302 | 2.22419 | 8  |
| -3 | -8 | -7 | 13.0174 | 3.95184 | 1  |
| -3 | -8 | -7 | 11.3307 | 3.71184 | 2  |
| -3 | -8 | -7 | 12.6059 | 3.55081 | 10 |
| -4 | -8 | -7 | 120.892 | 8.81437 | 8  |
| -4 | -8 | -7 | 127.817 | 9.55895 | 10 |
| -4 | -8 | -7 | 123.498 | 11.3158 | 1  |
| -4 | 8  | -7 | 118.447 | 7.63431 | 6  |
| 4  | 8  | 7  | 122.054 | 11.0814 | 13 |
| -4 | 8  | -7 | 118.766 | 7.78445 | 9  |
| -4 | 8  | -7 | 122.201 | 9.26874 | 12 |
| -5 | -8 | -7 | 5.96104 | 2.59793 | 10 |
| -5 | -8 | -7 | 4.37919 | 2.17011 | 8  |
| -5 | 8  | -7 | 10.4941 | 1.34148 | 9  |
| -5 | 8  | -7 | 9.41164 | 0.94131 | 6  |
| 5  | 8  | 7  | 8.28082 | 3.88012 | 13 |
| -5 | 8  | -7 | 10.7323 | 2.82766 | 12 |
| -6 | -8 | -7 | 27.1468 | 3.73930 | 10 |
| -6 | -8 | -7 | 30.3648 | 3.85734 | 8  |
| 6  | 8  | 7  | 29.4374 | 5.00574 | 13 |
| -6 | 8  | -7 | 34.3865 | 2.16566 | 6  |
| -6 | 8  | -7 | 32.8508 | 4.32216 | 12 |
| -6 | 8  | -7 | 33.2838 | 2.46180 | 9  |
| -7 | -8 | -7 | 1.24080 | 1.45655 | 8  |
| -7 | 8  | -7 | 2.60837 | 0.52310 | 9  |
| -7 | 8  | -7 | 1.74422 | 0.58176 | 9  |
| 7  | 8  | 7  | 0.72641 | 2.72150 | 13 |
| -7 | 8  | -7 | 0.34160 | 1.77091 | 12 |
| 9  | -9 | -7 | 8.36799 | 2.88332 | 13 |
| -9 | -9 | 7  | 5.43595 | 2.38435 | 10 |
| -9 | 9  | 7  | 9.06363 | 1.91592 | 7  |
| 8  | -9 | -7 | 4.21177 | 2.73189 | 13 |
| -8 | -9 | 7  | 3.72945 | 2.69251 | 10 |
| -8 | 9  | 7  | 5.46764 | 1.98284 | 7  |
| 7  | -9 | -7 | 10.5506 | 3.32768 | 13 |

|    |    |    |         |         |    |
|----|----|----|---------|---------|----|
| -7 | -9 | 7  | 12.5278 | 5.03642 | 1  |
| -7 | -9 | 7  | 8.17391 | 3.30291 | 10 |
| -7 | 9  | 7  | 14.2792 | 2.49316 | 7  |
| -7 | 9  | 7  | 11.8829 | 1.43658 | 11 |
| -6 | -9 | 7  | 177.858 | 16.2961 | 1  |
| 6  | -9 | -7 | 162.583 | 12.3172 | 13 |
| -6 | -9 | 7  | 162.162 | 13.0933 | 10 |
| -6 | 9  | 7  | 177.154 | 11.8233 | 7  |
| -6 | 9  | 7  | 191.867 | 11.5526 | 11 |
| 5  | -9 | -7 | 316.003 | 23.7821 | 2  |
| -5 | -9 | 7  | 333.950 | 25.0002 | 1  |
| 5  | 9  | -7 | 324.415 | 22.0835 | 10 |
| -5 | 9  | 7  | 296.364 | 20.7080 | 10 |
| 4  | -9 | -7 | 6.27467 | 3.51243 | 2  |
| 3  | -9 | -7 | 17.2193 | 4.38198 | 2  |
| 2  | -9 | -7 | 126.918 | 11.0702 | 2  |
| -2 | 9  | 7  | 128.505 | 10.0024 | 5  |
| 1  | -9 | -7 | 25.3631 | 5.01542 | 2  |
| -1 | 9  | 7  | 21.2532 | 4.76963 | 5  |
| 0  | -9 | -7 | 1.65132 | 2.52436 | 2  |
| 0  | 9  | -7 | 2.46827 | 1.21167 | 4  |
| 0  | 9  | -7 | 1.74307 | 1.12664 | 4  |
| -1 | -9 | -7 | 33.5990 | 6.40370 | 1  |
| -1 | -9 | -7 | 33.8729 | 5.13673 | 2  |
| -1 | 9  | -7 | 21.0606 | 2.24244 | 4  |
| -1 | 9  | -7 | 21.5022 | 2.19408 | 4  |
| -2 | -9 | -7 | 30.2835 | 5.74571 | 2  |
| -2 | -9 | -7 | 27.3304 | 6.13640 | 1  |
| -2 | 9  | -7 | 42.1353 | 2.55948 | 6  |
| -3 | -9 | -7 | 322.035 | 24.1329 | 1  |
| -3 | -9 | -7 | 324.454 | 21.8286 | 10 |
| -3 | 9  | -7 | 319.634 | 20.1870 | 9  |
| -3 | 9  | -7 | 347.183 | 21.6127 | 12 |
| -3 | 9  | -7 | 328.174 | 20.0635 | 6  |
| -4 | -9 | -7 | 64.2216 | 6.50960 | 10 |
| -4 | -9 | -7 | 69.4824 | 5.88652 | 8  |
| -4 | -9 | -7 | 70.7834 | 8.43505 | 1  |
| 4  | 9  | 7  | 70.3906 | 7.65866 | 13 |
| -4 | 9  | -7 | 66.8889 | 4.56741 | 9  |
| -4 | 9  | -7 | 69.6919 | 4.43802 | 6  |
| -4 | 9  | -7 | 70.5469 | 6.31977 | 12 |
| -5 | 9  | -7 | 43.5197 | 5.28258 | 12 |
| -5 | 9  | -7 | 48.2348 | 3.25486 | 9  |
| -5 | 9  | -7 | 43.6879 | 3.01379 | 6  |
| -6 | -9 | -7 | 13.6152 | 2.50366 | 8  |
| -6 | -9 | -7 | 11.4609 | 2.50518 | 10 |
| -6 | 9  | -7 | 10.4958 | 2.69728 | 12 |
| -6 | 9  | -7 | 12.8393 | 1.46110 | 9  |
| 6  | 9  | 7  | 12.7697 | 3.83883 | 13 |
| -6 | 9  | -7 | 12.7362 | 0.97557 | 6  |

|    |     |    |         |         |    |
|----|-----|----|---------|---------|----|
| -6 | 9   | -7 | 12.9892 | 1.03547 | 6  |
| -7 | -9  | -7 | 6.86889 | 1.74133 | 8  |
| -7 | 9   | -7 | 6.69271 | 1.96170 | 12 |
| 7  | 9   | 7  | 8.98981 | 2.92637 | 13 |
| 9  | -10 | -7 | 17.3868 | 3.04433 | 13 |
| -9 | -10 | 7  | 14.2230 | 2.83888 | 10 |
| -9 | 10  | 7  | 15.8869 | 2.56269 | 7  |
| -8 | -10 | 7  | 15.2837 | 3.47144 | 10 |
| 8  | -10 | -7 | 15.2478 | 3.09412 | 13 |
| -8 | 10  | 7  | 13.7115 | 2.47962 | 7  |
| -7 | -10 | 7  | 3.11348 | 4.06956 | 1  |
| -7 | -10 | 7  | 0.13910 | 2.75189 | 10 |
| -7 | 10  | 7  | 0.61958 | 1.75702 | 7  |
| -7 | 10  | 7  | 3.25074 | 1.13144 | 11 |
| -6 | -10 | 7  | 14.3253 | 6.23745 | 1  |
| 6  | -10 | -7 | 2.88438 | 3.74249 | 13 |
| -6 | 10  | 7  | 2.59725 | 1.18129 | 11 |
| -6 | 10  | 7  | 3.85260 | 2.15298 | 7  |
| 5  | -10 | -7 | 77.0973 | 9.43280 | 2  |
| -5 | -10 | 7  | 83.1291 | 11.0275 | 1  |
| 5  | 10  | -7 | 77.6695 | 7.56191 | 10 |
| -5 | 10  | 7  | 64.6491 | 6.14760 | 10 |
| 4  | -10 | -7 | 19.0119 | 4.97700 | 2  |
| 3  | -10 | -7 | -0.1081 | 2.89137 | 2  |
| 2  | -10 | -7 | 48.2631 | 7.19880 | 2  |
| 1  | -10 | -7 | 20.7855 | 4.68370 | 2  |
| 1  | 10  | -7 | 31.8507 | 3.16296 | 4  |
| -1 | 10  | 7  | 29.7600 | 5.27558 | 5  |
| 0  | -10 | -7 | 21.1142 | 5.06348 | 2  |
| 0  | 10  | -7 | 33.3753 | 3.12717 | 4  |
| -1 | -10 | -7 | 133.513 | 12.1652 | 2  |
| -1 | -10 | -7 | 137.354 | 13.1069 | 1  |
| -1 | 10  | -7 | 152.578 | 9.15898 | 4  |
| -1 | 10  | -7 | 147.002 | 9.14744 | 4  |
| -2 | -10 | -7 | 36.9783 | 5.85322 | 2  |
| -2 | -10 | -7 | 36.9702 | 6.45228 | 1  |
| -2 | 10  | -7 | 28.4911 | 2.44515 | 9  |
| -2 | 10  | -7 | 26.7376 | 2.13100 | 6  |
| -3 | -10 | -7 | 292.137 | 19.1028 | 10 |
| -3 | -10 | -7 | 290.615 | 21.5032 | 2  |
| -3 | -10 | -7 | 296.107 | 21.5763 | 1  |
| -3 | 10  | -7 | 272.984 | 17.0949 | 6  |
| 3  | 10  | 7  | 280.108 | 19.4811 | 13 |
| -3 | 10  | -7 | 260.728 | 18.3754 | 12 |
| -3 | 10  | -7 | 268.620 | 17.2205 | 9  |
| -4 | -10 | -7 | 2.49151 | 2.60841 | 10 |
| -4 | -10 | -7 | 1.61479 | 4.10769 | 1  |
| -4 | 10  | -7 | 2.33193 | 2.38186 | 12 |
| -4 | 10  | -7 | 3.03989 | 0.86895 | 9  |
| 4  | 10  | 7  | 2.60381 | 3.84346 | 13 |

|    |     |    |         |         |    |
|----|-----|----|---------|---------|----|
| -4 | 10  | -7 | 3.11071 | 0.63508 | 6  |
| -5 | -10 | -7 | 2.40132 | 3.33066 | 1  |
| -5 | -10 | -7 | 2.81080 | 2.95868 | 10 |
| -5 | -10 | -7 | 2.99419 | 2.31599 | 8  |
| -5 | 10  | -7 | 5.54285 | 0.92851 | 9  |
| -5 | 10  | -7 | 9.15894 | 3.05670 | 12 |
| 5  | 10  | 7  | 7.72819 | 4.61415 | 13 |
| -5 | 10  | -7 | 2.91711 | 0.60581 | 6  |
| -5 | 10  | -7 | 3.79391 | 0.56937 | 6  |
| -6 | -10 | -7 | 8.88941 | 1.97626 | 8  |
| -6 | -10 | -7 | 7.50699 | 2.05107 | 10 |
| 6  | 10  | 7  | 10.0882 | 3.82298 | 13 |
| -6 | 10  | -7 | 10.8848 | 1.07588 | 9  |
| -6 | 10  | -7 | 6.16991 | 0.92088 | 9  |
| 7  | 10  | 7  | -0.5990 | 2.27582 | 13 |
| -7 | 10  | -7 | 3.04962 | 1.75267 | 12 |
| -9 | -11 | 7  | 1.83199 | 2.14181 | 10 |
| -8 | -11 | 7  | 10.0509 | 2.65095 | 10 |
| -8 | 11  | 7  | 3.73578 | 1.51586 | 7  |
| -7 | -11 | 7  | 11.7851 | 3.64285 | 10 |
| -7 | -11 | 7  | 11.8737 | 5.06880 | 1  |
| -7 | 11  | 7  | 10.2314 | 1.23187 | 11 |
| -7 | 11  | 7  | 9.31122 | 1.31276 | 11 |
| -7 | 11  | 7  | 10.5921 | 2.29149 | 7  |
| -6 | 11  | 7  | 90.0545 | 6.19124 | 11 |
| 5  | -11 | -7 | 6.00160 | 2.70588 | 13 |
| -5 | -11 | 7  | 11.2301 | 3.34413 | 13 |
| -5 | -11 | 7  | 13.4778 | 5.76717 | 1  |
| 5  | 11  | -7 | 9.41910 | 3.70787 | 10 |
| 4  | -11 | -7 | 62.3410 | 9.25513 | 2  |
| 4  | 11  | -7 | 74.7310 | 7.96091 | 10 |
| 3  | -11 | -7 | 1.05334 | 3.25879 | 2  |
| 2  | -11 | -7 | 10.6308 | 3.99197 | 2  |
| 1  | -11 | -7 | 121.134 | 10.8753 | 2  |
| 1  | 11  | -7 | 104.268 | 7.90469 | 4  |
| 0  | -11 | -7 | 229.951 | 17.0049 | 2  |
| 0  | 11  | -7 | 205.147 | 13.8987 | 4  |
| -1 | -11 | -7 | 29.5469 | 5.82807 | 2  |
| -1 | -11 | -7 | 30.4858 | 6.32367 | 1  |
| -2 | -11 | -7 | 79.8320 | 10.2030 | 1  |
| -2 | -11 | -7 | 77.9796 | 9.58301 | 2  |
| -2 | 11  | -7 | 113.154 | 6.55075 | 9  |
| -2 | 11  | -7 | 111.773 | 6.33253 | 6  |
| -3 | -11 | -7 | 242.018 | 16.0902 | 10 |
| -3 | -11 | -7 | 235.780 | 18.5700 | 1  |
| -3 | 11  | -7 | 218.776 | 15.3413 | 14 |
| 3  | 11  | 7  | 242.388 | 16.5352 | 13 |
| -3 | 11  | -7 | 203.358 | 13.9888 | 9  |
| -3 | 11  | -7 | 221.774 | 13.8911 | 6  |
| -3 | 11  | -7 | 227.707 | 15.3467 | 12 |

|    |     |    |         |         |    |
|----|-----|----|---------|---------|----|
| -4 | -11 | -7 | 1.38504 | 3.53940 | 1  |
| -4 | -11 | -7 | 1.13295 | 2.56499 | 10 |
| -4 | 11  | -7 | 1.28511 | 0.71650 | 9  |
| -4 | 11  | -7 | 1.29195 | 2.28643 | 14 |
| -4 | 11  | -7 | 1.35505 | 0.58339 | 6  |
| -4 | 11  | -7 | -1.2996 | 2.38217 | 12 |
| 4  | 11  | 7  | -0.1967 | 2.96125 | 13 |
| -5 | -11 | -7 | 168.409 | 11.4576 | 8  |
| -5 | -11 | -7 | 152.956 | 11.9127 | 10 |
| -5 | 11  | -7 | 158.768 | 9.94984 | 6  |
| -5 | 11  | -7 | 158.214 | 10.0904 | 9  |
| -5 | 11  | -7 | 165.710 | 9.97488 | 6  |
| 5  | 11  | 7  | 174.810 | 13.1583 | 13 |
| -5 | 11  | -7 | 166.597 | 11.8373 | 12 |
| -6 | -11 | -7 | -0.0305 | 1.34615 | 8  |
| -6 | -11 | -7 | 0.48483 | 2.07047 | 10 |
| -6 | 11  | -7 | 1.01642 | 1.63397 | 12 |
| 6  | 11  | 7  | 5.64974 | 3.12840 | 13 |
| -7 | 11  | -7 | 22.3885 | 2.89516 | 12 |
| 7  | 11  | 7  | 17.3043 | 3.18275 | 13 |
| -9 | -12 | 7  | 2.41059 | 1.53143 | 10 |
| -8 | -12 | 7  | 43.7373 | 5.32593 | 10 |
| -8 | 12  | 7  | 42.7423 | 4.07811 | 7  |
| -7 | -12 | 7  | 5.73364 | 3.06509 | 10 |
| -7 | 12  | 7  | 5.74754 | 1.94013 | 7  |
| -6 | 12  | 7  | 169.443 | 10.7686 | 11 |
| 5  | -12 | -7 | 34.6677 | 5.80934 | 13 |
| -5 | 12  | 7  | 32.6216 | 3.48048 | 11 |
| 4  | -12 | -7 | 18.3280 | 5.08848 | 2  |
| -4 | 12  | 7  | 14.7479 | 3.17670 | 10 |
| 4  | 12  | -7 | 15.6996 | 3.47866 | 10 |
| 3  | -12 | -7 | 10.1105 | 4.21590 | 2  |
| 2  | -12 | -7 | 8.51042 | 3.92590 | 2  |
| 1  | -12 | -7 | 1.50843 | 3.45096 | 2  |
| 1  | 12  | -7 | 2.15183 | 1.44913 | 4  |
| 0  | -12 | -7 | 140.986 | 12.6055 | 2  |
| -1 | -12 | -7 | 174.944 | 14.6508 | 2  |
| -1 | -12 | -7 | 169.002 | 15.0941 | 1  |
| -2 | -12 | -7 | 42.8777 | 7.40061 | 1  |
| -2 | -12 | -7 | 43.7196 | 6.84716 | 2  |
| -2 | -12 | -7 | 40.9779 | 5.53661 | 10 |
| -2 | 12  | -7 | 43.8979 | 3.28769 | 9  |
| -2 | 12  | -7 | 53.6202 | 4.99336 | 12 |
| -2 | 12  | -7 | 41.9279 | 2.97310 | 6  |
| -3 | -12 | -7 | -0.5647 | 2.55541 | 10 |
| -3 | -12 | -7 | 3.54420 | 3.85720 | 1  |
| -3 | 12  | -7 | 1.22462 | 0.77092 | 9  |
| -3 | 12  | -7 | 1.99061 | 0.55691 | 6  |
| 3  | 12  | 7  | 0.87563 | 3.46163 | 13 |
| -3 | 12  | -7 | 0.06576 | 2.27963 | 14 |



|    |     |    |         |         |    |
|----|-----|----|---------|---------|----|
| -3 | 12  | -7 | -0.2939 | 2.44152 | 12 |
| -4 | -12 | -7 | 5.38658 | 3.89898 | 1  |
| -4 | -12 | -7 | 3.68629 | 2.14409 | 10 |
| -4 | 12  | -7 | 10.7126 | 1.32415 | 9  |
| -4 | 12  | -7 | 7.23043 | 0.78231 | 6  |
| -4 | 12  | -7 | 7.81260 | 0.78474 | 6  |
| 4  | 12  | 7  | 2.80166 | 3.81010 | 13 |
| -4 | 12  | -7 | 8.15419 | 2.78287 | 12 |
| -4 | 12  | -7 | 6.85582 | 3.08896 | 14 |
| -5 | -12 | -7 | 122.744 | 9.17885 | 10 |
| -5 | 12  | -7 | 108.703 | 6.95977 | 9  |
| 5  | 12  | 7  | 114.485 | 10.0960 | 13 |
| -5 | 12  | -7 | 107.673 | 6.74805 | 6  |
| -5 | 12  | -7 | 105.646 | 8.84822 | 12 |
| -5 | 12  | -7 | 107.576 | 6.74945 | 6  |
| -5 | 12  | -7 | 113.348 | 6.92103 | 9  |
| -6 | -12 | -7 | 12.9463 | 2.44142 | 8  |
| -6 | -12 | -7 | 9.21210 | 2.08601 | 10 |
| -6 | 12  | -7 | 5.92549 | 2.48839 | 12 |
| 6  | 12  | 7  | 13.2366 | 3.56685 | 13 |
| -8 | -13 | 7  | 30.8365 | 4.07173 | 10 |
| -8 | 13  | 7  | 37.0797 | 3.54669 | 7  |
| -7 | -13 | 7  | 3.23797 | 3.00310 | 10 |
| -6 | 13  | 7  | 18.6996 | 2.03450 | 11 |
| -6 | 13  | 7  | 15.9166 | 2.18094 | 11 |
| 6  | 13  | -7 | 19.8938 | 4.44158 | 10 |
| 5  | -13 | -7 | 120.270 | 9.90557 | 13 |
| -5 | -13 | 7  | 94.5186 | 8.79333 | 13 |
| -5 | 13  | 7  | 117.280 | 7.50005 | 11 |
| 5  | 13  | -7 | 103.006 | 9.54528 | 10 |
| 4  | -13 | -7 | 48.0793 | 7.73517 | 2  |
| -4 | -13 | 7  | 32.1947 | 5.05515 | 13 |
| -4 | 13  | 7  | 37.2201 | 4.48156 | 10 |
| 4  | 13  | -7 | 37.0774 | 5.75974 | 10 |
| 2  | -13 | -7 | 14.9016 | 4.75519 | 2  |
| 1  | -13 | -7 | 10.5440 | 4.51497 | 2  |
| 0  | -13 | -7 | 31.2428 | 6.42495 | 2  |
| -1 | -13 | -7 | 296.221 | 20.6320 | 2  |
| -1 | 13  | -7 | 236.078 | 16.0059 | 11 |
| -2 | -13 | -7 | 120.728 | 12.0104 | 1  |
| -2 | 13  | -7 | 106.442 | 8.69430 | 12 |
| -2 | 13  | -7 | 110.763 | 7.37972 | 9  |
| -2 | 13  | -7 | 121.285 | 7.13064 | 6  |
| -2 | 13  | -7 | 107.201 | 9.26823 | 14 |
| -3 | 13  | -7 | 37.3973 | 5.61322 | 14 |
| -3 | 13  | -7 | 40.2935 | 5.56008 | 12 |
| -3 | 13  | -7 | 36.4899 | 2.78256 | 9  |
| -3 | 13  | -7 | 34.9194 | 2.48739 | 6  |
| -4 | -13 | -7 | 66.7355 | 6.53858 | 10 |
| -4 | -13 | -7 | 68.3950 | 8.81409 | 1  |

|    |     |    |         |         |    |
|----|-----|----|---------|---------|----|
| -4 | 13  | -7 | 61.0676 | 4.00149 | 9  |
| -4 | 13  | -7 | 55.9032 | 6.03616 | 12 |
| 4  | 13  | 7  | 59.4464 | 6.47336 | 13 |
| -4 | 13  | -7 | 52.1640 | 6.77702 | 14 |
| -4 | 13  | -7 | 55.7000 | 3.71755 | 6  |
| -4 | 13  | -7 | 57.2723 | 3.74407 | 6  |
| -5 | -13 | -7 | 14.2085 | 3.24167 | 10 |
| 5  | 13  | 7  | 15.9929 | 3.44171 | 13 |
| -5 | 13  | -7 | 10.4700 | 3.09899 | 12 |
| -5 | 13  | -7 | 11.0445 | 1.00534 | 9  |
| -6 | -13 | -7 | 0.88729 | 2.08553 | 10 |
| -6 | 13  | -7 | 2.73008 | 2.19553 | 12 |
| 6  | 13  | 7  | 1.05253 | 2.92284 | 13 |
| -8 | -14 | 7  | 19.9222 | 3.09708 | 10 |
| -7 | -14 | 7  | 0.89132 | 1.94374 | 10 |
| 7  | 14  | -7 | 2.01302 | 2.53874 | 10 |
| -6 | -14 | 7  | 14.3768 | 5.63334 | 1  |
| 6  | 14  | -7 | 15.1842 | 4.61998 | 10 |
| -6 | 14  | 7  | 17.9215 | 1.68734 | 11 |
| -6 | 14  | 7  | 17.7104 | 1.65907 | 11 |
| -5 | -14 | 7  | 57.3217 | 5.66654 | 13 |
| 5  | -14 | -7 | 43.2626 | 6.06330 | 13 |
| -5 | 14  | 7  | 46.0054 | 3.89698 | 11 |
| 5  | 14  | -7 | 59.7695 | 6.72370 | 10 |
| -4 | -14 | 7  | 22.5822 | 4.39567 | 13 |
| 4  | -14 | -7 | 29.6803 | 4.03084 | 13 |
| 4  | 14  | -7 | 26.2475 | 5.04312 | 10 |
| -4 | 14  | 7  | 29.0623 | 3.75516 | 10 |
| 3  | -14 | -7 | 12.0857 | 4.97505 | 2  |
| -3 | -14 | 7  | 16.6108 | 3.58194 | 13 |
| 3  | 14  | -7 | 15.8910 | 3.36003 | 10 |
| -3 | 14  | 7  | 13.8266 | 3.00672 | 10 |
| 2  | -14 | -7 | 13.3715 | 4.98166 | 2  |
| 2  | 14  | -7 | 11.9136 | 2.98988 | 10 |
| -2 | 14  | 7  | 12.7287 | 3.39405 | 10 |
| 1  | -14 | -7 | 0.69232 | 4.55558 | 2  |
| -1 | 14  | 7  | 1.13699 | 2.71689 | 10 |
| 0  | -14 | -7 | 18.2728 | 5.00907 | 2  |
| 0  | 14  | -7 | 10.3015 | 2.04124 | 11 |
| -1 | -14 | -7 | 21.3308 | 5.30729 | 2  |
| 1  | 14  | 7  | 25.9733 | 5.03569 | 10 |
| -1 | 14  | -7 | 21.5981 | 1.72127 | 11 |
| -1 | 14  | -7 | 12.3830 | 3.08653 | 14 |
| -2 | -14 | -7 | 1.14309 | 3.57263 | 1  |
| -2 | 14  | -7 | -1.5352 | 2.26253 | 14 |
| 2  | 14  | 7  | 1.88027 | 3.71307 | 10 |
| -2 | 14  | -7 | -0.0605 | 0.52198 | 6  |
| -2 | 14  | -7 | 0.77431 | 1.05257 | 9  |
| -2 | 14  | -7 | 0.40629 | 2.19429 | 12 |
| -3 | -14 | -7 | 16.1523 | 6.03119 | 1  |

|    |     |    |         |         |    |
|----|-----|----|---------|---------|----|
| -3 | -14 | -7 | 11.3549 | 3.48662 | 10 |
| -3 | 14  | -7 | 14.0277 | 3.04545 | 14 |
| -3 | 14  | -7 | 15.7169 | 3.10732 | 12 |
| -3 | 14  | -7 | 15.1322 | 1.28138 | 6  |
| -3 | 14  | -7 | 17.5177 | 1.86190 | 9  |
| -4 | -14 | -7 | 38.0686 | 5.60075 | 10 |
| -4 | -14 | -7 | 43.4808 | 8.40852 | 1  |
| -4 | 14  | -7 | 35.7509 | 2.44380 | 6  |
| -4 | 14  | -7 | 38.9353 | 2.80440 | 9  |
| -4 | 14  | -7 | 38.0693 | 2.46205 | 6  |
| -4 | 14  | -7 | 39.7909 | 2.80590 | 9  |
| -5 | -14 | -7 | 5.53733 | 2.89607 | 10 |
| -6 | -14 | -7 | 8.06714 | 2.28246 | 10 |
| -6 | 14  | -7 | 11.2655 | 2.50810 | 12 |
| -8 | -15 | 7  | 3.51436 | 1.80896 | 10 |
| 7  | 15  | -7 | 40.9422 | 5.23294 | 10 |
| 6  | 15  | -7 | 63.9481 | 7.62378 | 10 |
| -5 | -15 | 7  | 1.19746 | 2.77182 | 13 |
| 5  | -15 | -7 | 3.48587 | 2.79592 | 13 |
| 5  | 15  | -7 | 0.67613 | 3.09059 | 10 |
| -5 | 15  | 7  | 2.84106 | 1.10313 | 11 |
| 4  | -15 | -7 | -2.0156 | 2.01410 | 13 |
| -4 | -15 | 7  | -0.5005 | 2.36112 | 13 |
| 4  | 15  | -7 | 4.61201 | 3.72895 | 10 |
| -4 | 15  | 7  | -0.9874 | 2.02850 | 10 |
| -3 | -15 | 7  | 20.1511 | 3.67323 | 13 |
| 3  | -15 | -7 | 34.8790 | 4.89327 | 13 |
| 3  | 15  | -7 | 24.6462 | 4.58095 | 10 |
| 2  | -15 | -7 | -0.7266 | 2.18627 | 13 |
| -2 | -15 | 7  | 2.10865 | 2.40633 | 13 |
| 2  | -15 | -7 | 2.44213 | 5.16187 | 2  |
| 2  | 15  | -7 | 0.10746 | 2.26391 | 10 |
| -2 | 15  | 7  | 4.23470 | 2.52327 | 10 |
| 1  | -15 | -7 | 10.8328 | 3.06446 | 13 |
| 1  | -15 | -7 | 10.1285 | 5.58569 | 2  |
| 1  | 15  | -7 | 9.40180 | 2.67777 | 10 |
| -1 | 15  | 7  | 12.9938 | 3.46957 | 10 |
| 0  | -15 | -7 | 13.1049 | 4.80370 | 2  |
| 0  | 15  | -7 | 6.82301 | 2.88205 | 14 |
| -1 | -15 | -7 | 34.9445 | 4.94385 | 13 |
| 1  | 15  | 7  | 36.7880 | 5.78532 | 10 |
| -1 | 15  | -7 | 31.8612 | 4.98280 | 14 |
| -2 | 15  | -7 | 66.4310 | 6.26262 | 14 |
| -2 | 15  | -7 | 63.4636 | 6.05130 | 12 |
| -2 | 15  | -7 | 64.1749 | 4.60954 | 9  |
| -2 | 15  | -7 | 64.7551 | 4.17365 | 6  |
| -3 | -15 | -7 | 23.4703 | 4.39353 | 10 |
| -3 | -15 | -7 | 24.4747 | 6.31802 | 1  |
| -3 | 15  | -7 | 27.4904 | 2.34306 | 9  |
| -3 | 15  | -7 | 28.4615 | 1.91620 | 6  |

|    |     |    |         |         |    |
|----|-----|----|---------|---------|----|
| -3 | 15  | -7 | 24.3160 | 3.77483 | 12 |
| -3 | 15  | -7 | 28.8231 | 3.92860 | 14 |
| -4 | -15 | -7 | 32.9747 | 5.39782 | 10 |
| -4 | 15  | -7 | 30.5176 | 2.30882 | 9  |
| -4 | 15  | -7 | 33.7716 | 2.31555 | 9  |
| -4 | 15  | -7 | 34.4225 | 5.24899 | 14 |
| -4 | 15  | -7 | 29.6742 | 4.89089 | 12 |
| -5 | -15 | -7 | 15.8307 | 3.33436 | 10 |
| -5 | 15  | -7 | 19.1378 | 3.21329 | 12 |
| -6 | -15 | -7 | 2.75936 | 1.97085 | 10 |
| -6 | 15  | -7 | 1.18152 | 1.44135 | 12 |
| -8 | -16 | 7  | 5.65770 | 1.88851 | 10 |
| 7  | 16  | -7 | 43.3578 | 5.16264 | 10 |
| 6  | 16  | -7 | 32.1099 | 6.05397 | 10 |
| 5  | -16 | -7 | 7.60244 | 2.95264 | 13 |
| -5 | 16  | 7  | 6.19924 | 1.09591 | 11 |
| 5  | 16  | -7 | 15.2744 | 4.40194 | 10 |
| -5 | 16  | 7  | 7.35554 | 1.28782 | 11 |
| -4 | -16 | 7  | 9.25066 | 2.81187 | 13 |
| 4  | -16 | -7 | 6.64832 | 2.52251 | 13 |
| 4  | 16  | -7 | 12.8326 | 3.64474 | 10 |
| -4 | 16  | 7  | 8.80193 | 1.86929 | 11 |
| 3  | -16 | -7 | 29.2733 | 4.21862 | 13 |
| -3 | -16 | 7  | 39.3658 | 5.52121 | 13 |
| -3 | 16  | 7  | 25.6385 | 4.45017 | 10 |
| 2  | -16 | -7 | 4.77829 | 2.36150 | 13 |
| -2 | -16 | 7  | 8.43083 | 2.64005 | 13 |
| -2 | 16  | 7  | 5.17144 | 2.71072 | 10 |
| 1  | -16 | -7 | 1.76221 | 2.88969 | 13 |
| -1 | 16  | 7  | 8.01743 | 3.34529 | 10 |
| 1  | 16  | -7 | 2.18241 | 2.54753 | 14 |
| 1  | 16  | -7 | 5.13078 | 2.10069 | 11 |
| 0  | -16 | -7 | 52.8511 | 5.46401 | 13 |
| 0  | 16  | -7 | 58.4169 | 4.28251 | 11 |
| 0  | 16  | 7  | 54.5132 | 6.86631 | 10 |
| 0  | 16  | -7 | 59.7672 | 5.89752 | 14 |
| -1 | -16 | -7 | 16.7479 | 3.39036 | 13 |
| 1  | 16  | 7  | 19.0048 | 4.63857 | 10 |
| -1 | 16  | -7 | 18.7191 | 3.80902 | 14 |
| -2 | -16 | -7 | 5.55783 | 4.90378 | 1  |
| -2 | 16  | -7 | 5.18999 | 2.48560 | 12 |
| -2 | 16  | -7 | 4.64343 | 0.72872 | 6  |
| 2  | 16  | 7  | 1.71024 | 3.67311 | 10 |
| -2 | 16  | -7 | 5.78192 | 2.72278 | 14 |
| -2 | 16  | -7 | 4.18338 | 1.20672 | 9  |
| -3 | -16 | -7 | 34.3876 | 6.58945 | 10 |
| -3 | -16 | -7 | 40.5886 | 7.76189 | 1  |
| 3  | 16  | 7  | 42.9351 | 7.75534 | 10 |
| -3 | 16  | -7 | 37.5859 | 2.89898 | 9  |
| -3 | 16  | -7 | 40.3189 | 2.60418 | 6  |

|    |     |    |         |         |    |
|----|-----|----|---------|---------|----|
| -3 | 16  | -7 | 36.1058 | 5.73555 | 14 |
| -3 | 16  | -7 | 38.2466 | 2.55147 | 6  |
| -4 | -16 | -7 | 0.45186 | 2.90015 | 10 |
| -4 | 16  | -7 | 2.08026 | 0.50698 | 9  |
| -4 | 16  | -7 | -1.3247 | 3.25376 | 14 |
| -4 | 16  | -7 | 1.02906 | 0.46937 | 9  |
| -4 | 16  | -7 | 2.41163 | 2.68388 | 12 |
| -5 | -16 | -7 | 87.7086 | 6.99069 | 10 |
| -5 | 16  | -7 | 83.2965 | 7.09032 | 12 |
| -6 | -16 | -7 | 3.63726 | 1.90571 | 10 |
| -6 | 16  | -7 | 4.85577 | 1.94864 | 12 |
| 7  | 17  | -7 | 4.16885 | 3.28551 | 10 |
| 6  | 17  | -7 | 6.31221 | 3.82369 | 10 |
| -5 | -17 | 7  | 16.0224 | 3.27507 | 13 |
| -5 | 17  | 7  | 19.0853 | 1.61482 | 11 |
| 5  | 17  | -7 | 17.5625 | 4.37163 | 10 |
| -5 | 17  | 7  | 20.5654 | 1.64358 | 11 |
| -4 | -17 | 7  | 7.25328 | 2.81217 | 13 |
| -4 | 17  | 7  | 8.26924 | 1.50554 | 11 |
| 4  | 17  | -7 | 14.5848 | 3.81186 | 10 |
| 3  | -17 | -7 | 24.8165 | 4.02115 | 13 |
| -3 | -17 | 7  | 20.5331 | 3.52073 | 13 |
| 3  | 17  | -7 | 23.6592 | 4.03480 | 10 |
| -3 | 17  | 7  | 28.3035 | 4.16834 | 10 |
| 2  | -17 | -7 | 16.4947 | 3.29834 | 13 |
| -2 | -17 | 7  | 15.0994 | 3.16223 | 13 |
| -2 | 17  | 7  | 13.2486 | 3.17483 | 10 |
| 2  | 17  | -7 | 13.9286 | 3.44359 | 10 |
| -1 | -17 | 7  | 18.1016 | 3.53042 | 13 |
| 1  | -17 | -7 | 20.5134 | 3.24845 | 13 |
| 1  | 17  | -7 | 19.6941 | 3.35193 | 14 |
| -1 | 17  | 7  | 24.6231 | 4.30355 | 10 |
| 1  | 17  | -7 | 21.5783 | 3.16595 | 11 |
| 0  | 17  | -7 | 10.1450 | 1.51039 | 11 |
| 0  | 17  | -7 | 9.23241 | 3.48269 | 14 |
| 0  | 17  | -7 | 11.9391 | 1.60730 | 11 |
| -1 | -17 | -7 | 240.285 | 16.3363 | 13 |
| -1 | 17  | -7 | 235.767 | 16.5386 | 14 |
| 1  | 17  | 7  | 258.913 | 17.9419 | 10 |
| -2 | 17  | -7 | 34.5910 | 2.30543 | 6  |
| -2 | 17  | -7 | 32.4857 | 2.69110 | 9  |
| -2 | 17  | -7 | 35.3075 | 5.22680 | 14 |
| 2  | 17  | 7  | 29.1042 | 5.39006 | 10 |
| -3 | 17  | -7 | 3.63984 | 0.54460 | 6  |
| -3 | 17  | -7 | 4.97752 | 2.89106 | 14 |
| -3 | 17  | -7 | 2.95185 | 0.86442 | 9  |
| -3 | 17  | -7 | 4.37905 | 3.15321 | 12 |
| 3  | 17  | 7  | 0.63661 | 2.74026 | 10 |
| -3 | 17  | -7 | 2.79808 | 0.51272 | 6  |
| -4 | -17 | -7 | 16.7055 | 3.90182 | 10 |

|    |     |    |         |         |    |
|----|-----|----|---------|---------|----|
| -4 | 17  | -7 | 16.2651 | 2.80693 | 12 |
| -4 | 17  | -7 | 15.4596 | 3.44002 | 14 |
| -5 | -17 | -7 | 41.0154 | 4.77431 | 10 |
| -5 | 17  | -7 | 44.1927 | 4.66370 | 12 |
| 7  | 18  | -7 | 22.3227 | 3.58300 | 10 |
| 6  | 18  | -7 | 27.0689 | 4.22331 | 10 |
| -5 | -18 | 7  | 5.31273 | 2.69465 | 13 |
| 5  | 18  | -7 | 5.10355 | 3.60875 | 10 |
| -4 | -18 | 7  | 68.6411 | 6.82895 | 13 |
| 4  | -18 | -7 | 50.6361 | 6.22152 | 13 |
| 4  | 18  | -7 | 76.7066 | 7.22609 | 10 |
| -4 | 18  | 7  | 63.7551 | 4.72717 | 11 |
| 3  | -18 | -7 | 14.0203 | 2.88580 | 13 |
| -3 | -18 | 7  | 15.7442 | 3.64850 | 13 |
| 3  | 18  | -7 | 12.9238 | 3.20248 | 10 |
| -3 | 18  | 7  | 13.2141 | 2.55428 | 10 |
| -2 | -18 | 7  | 45.3772 | 6.15444 | 13 |
| 2  | -18 | -7 | 50.1102 | 5.86397 | 13 |
| -2 | 18  | 7  | 47.5736 | 5.35539 | 10 |
| 2  | 18  | -7 | 48.6595 | 5.47374 | 10 |
| 1  | -18 | -7 | 21.7679 | 3.33614 | 13 |
| -1 | -18 | 7  | 21.7020 | 3.72640 | 13 |
| -1 | 18  | 7  | 25.8833 | 4.17054 | 10 |
| 1  | 18  | -7 | 17.0518 | 3.37723 | 14 |
| 1  | 18  | -7 | 20.1016 | 2.58605 | 11 |
| 0  | -18 | -7 | 37.3989 | 5.03086 | 13 |
| 0  | 18  | 7  | 42.1869 | 6.09016 | 10 |
| 0  | 18  | -7 | 42.5510 | 3.09760 | 11 |
| 0  | 18  | -7 | 41.1780 | 5.26955 | 14 |
| 0  | 18  | -7 | 44.4811 | 3.07985 | 11 |
| -1 | -18 | -7 | 26.8575 | 4.39697 | 13 |
| -1 | 18  | -7 | 32.5389 | 3.94036 | 9  |
| 1  | 18  | 7  | 27.4708 | 4.69971 | 10 |
| -1 | 18  | -7 | 29.3161 | 4.03867 | 14 |
| -2 | 18  | -7 | 55.2214 | 3.71530 | 6  |
| -2 | 18  | -7 | 58.9199 | 4.23441 | 9  |
| 2  | 18  | 7  | 63.1880 | 7.59868 | 10 |
| -2 | 18  | -7 | 51.1008 | 6.57917 | 14 |
| -3 | 18  | -7 | 1.43647 | 0.41363 | 6  |
| -3 | 18  | -7 | 1.16804 | 0.39683 | 6  |
| -3 | 18  | -7 | -0.5116 | 2.69459 | 14 |
| 3  | 18  | 7  | 2.28411 | 3.64599 | 10 |
| -3 | 18  | -7 | 1.18668 | 2.41223 | 12 |
| -3 | 18  | -7 | 2.12386 | 0.85941 | 9  |
| -4 | -18 | -7 | 3.73203 | 2.13973 | 10 |
| -4 | 18  | -7 | 3.54692 | 2.44719 | 12 |
| -5 | -18 | -7 | 18.4212 | 3.26635 | 10 |
| -5 | 18  | -7 | 15.1019 | 2.61825 | 12 |
| 7  | 19  | -7 | 21.9729 | 3.34610 | 10 |
| 6  | 19  | -7 | 20.4401 | 3.73065 | 10 |

|    |     |    |         |         |    |
|----|-----|----|---------|---------|----|
| 5  | -19 | -7 | 5.66229 | 3.16238 | 13 |
| -5 | -19 | 7  | 2.98626 | 3.18011 | 13 |
| 5  | 19  | -7 | 7.36763 | 3.42714 | 10 |
| -4 | -19 | 7  | 38.1492 | 5.36493 | 13 |
| 4  | -19 | -7 | 42.8538 | 5.25766 | 13 |
| -4 | 19  | 7  | 44.3902 | 3.19507 | 11 |
| -4 | 19  | 7  | 42.7856 | 3.26798 | 11 |
| -3 | -19 | 7  | 15.7669 | 3.91928 | 13 |
| 3  | -19 | -7 | 11.0228 | 2.83777 | 13 |
| -3 | 19  | 7  | 11.2661 | 1.93147 | 11 |
| 3  | 19  | -7 | 14.0298 | 3.29019 | 10 |
| 2  | -19 | -7 | 13.3403 | 3.28394 | 13 |
| -2 | -19 | 7  | 8.33647 | 2.75704 | 13 |
| 2  | 19  | -7 | 11.1907 | 2.95025 | 10 |
| -2 | 19  | 7  | 10.8854 | 2.77768 | 10 |
| -1 | -19 | 7  | 6.12332 | 2.88117 | 13 |
| 1  | -19 | -7 | 1.82812 | 2.38577 | 13 |
| -1 | 19  | 7  | 2.73710 | 2.75077 | 10 |
| 1  | 19  | -7 | 3.74395 | 2.59437 | 14 |
| 1  | 19  | -7 | 2.12983 | 1.60587 | 11 |
| 0  | -19 | -7 | 14.8174 | 3.05195 | 13 |
| 0  | 19  | -7 | 14.0136 | 3.26028 | 14 |
| 0  | 19  | 7  | 12.4037 | 3.73516 | 10 |
| -1 | -19 | -7 | 10.8707 | 2.78668 | 13 |
| -1 | 19  | -7 | 7.17166 | 1.49745 | 9  |
| 1  | 19  | 7  | 10.2277 | 3.98848 | 10 |
| -1 | 19  | -7 | 7.88748 | 3.20017 | 14 |
| -2 | 19  | -7 | 3.68643 | 1.24056 | 9  |
| 2  | 19  | 7  | 5.19698 | 3.86438 | 10 |
| -2 | 19  | -7 | 14.5789 | 3.46472 | 14 |
| -2 | 19  | -7 | 3.85943 | 0.65908 | 6  |
| -3 | 19  | -7 | 28.7458 | 2.25746 | 9  |
| 3  | 19  | 7  | 25.6669 | 5.20718 | 10 |
| -3 | 19  | -7 | 28.4564 | 1.85064 | 6  |
| -3 | 19  | -7 | 31.6588 | 2.25052 | 9  |
| -4 | -19 | -7 | 26.5907 | 3.61872 | 10 |
| -4 | 19  | -7 | 22.9256 | 3.73470 | 12 |
| 4  | 19  | 7  | 29.5922 | 4.31174 | 10 |
| 6  | 20  | -7 | 20.1351 | 3.38405 | 10 |
| -5 | -20 | 7  | 4.59692 | 2.21503 | 13 |
| 5  | -20 | -7 | 1.68834 | 2.23242 | 13 |
| 5  | 20  | -7 | 4.03549 | 2.85950 | 10 |
| 4  | -20 | -7 | 13.2067 | 2.96829 | 13 |
| -4 | -20 | 7  | 5.81990 | 2.72781 | 13 |
| 4  | 20  | -7 | 6.20428 | 2.86115 | 10 |
| -3 | -20 | 7  | 74.7183 | 8.30722 | 13 |
| 3  | -20 | -7 | 76.6466 | 7.65610 | 13 |
| 3  | 20  | -7 | 86.3552 | 7.17374 | 10 |
| -3 | 20  | 7  | 87.4165 | 6.01605 | 11 |
| 2  | -20 | -7 | 22.5616 | 3.43426 | 13 |

|    |     |    |         |         |    |
|----|-----|----|---------|---------|----|
| -2 | -20 | 7  | 30.9913 | 4.72908 | 13 |
| 2  | 20  | -7 | 21.0090 | 2.82777 | 11 |
| -2 | 20  | 7  | 21.3736 | 3.72839 | 10 |
| -1 | -20 | 7  | 18.7723 | 3.69337 | 13 |
| 1  | -20 | -7 | 21.8460 | 3.95443 | 13 |
| 1  | 20  | -7 | 20.1160 | 2.50575 | 11 |
| -1 | 20  | 7  | 22.8619 | 4.39104 | 10 |
| 1  | 20  | -7 | 19.2761 | 2.26289 | 11 |
| 0  | -20 | -7 | 9.55792 | 2.82562 | 13 |
| 0  | 20  | 7  | 11.5760 | 3.47798 | 10 |
| -1 | -20 | -7 | 2.42942 | 2.92148 | 13 |
| 1  | 20  | 7  | 7.67789 | 2.95576 | 10 |
| -1 | 20  | -7 | 1.04902 | 1.48719 | 9  |
| -2 | 20  | -7 | 4.10163 | 0.60764 | 6  |
| 2  | 20  | 7  | 5.00213 | 3.41974 | 10 |
| -2 | 20  | -7 | 4.55094 | 1.01643 | 9  |
| -3 | 20  | -7 | 3.54553 | 2.30404 | 12 |
| 3  | 20  | 7  | 2.47311 | 3.39783 | 10 |
| -3 | 20  | -7 | 1.33750 | 0.49242 | 9  |
| -3 | 20  | -7 | 0.35590 | 0.50966 | 9  |
| 4  | 20  | 7  | 3.54586 | 2.96155 | 10 |
| 6  | 21  | -7 | 8.31824 | 2.68080 | 10 |
| -5 | -21 | 7  | -0.9524 | 2.12806 | 13 |
| 5  | -21 | -7 | 0.76734 | 1.83987 | 13 |
| 5  | 21  | -7 | 2.16525 | 2.44509 | 10 |
| -4 | -21 | 7  | 8.64990 | 3.11192 | 13 |
| 4  | -21 | -7 | 3.90484 | 2.92919 | 13 |
| 4  | 21  | -7 | 5.00772 | 2.60419 | 10 |
| -3 | -21 | 7  | 41.9305 | 5.26348 | 13 |
| 3  | -21 | -7 | 42.2499 | 4.95430 | 13 |
| -3 | 21  | 7  | 43.8341 | 3.41262 | 11 |
| 3  | 21  | -7 | 42.2693 | 4.53549 | 10 |
| -2 | -21 | 7  | 8.87427 | 2.62317 | 13 |
| -2 | 21  | 7  | 4.66030 | 1.89521 | 10 |
| -2 | 21  | 7  | 6.14979 | 1.78865 | 11 |
| 2  | 21  | -7 | 11.2538 | 2.21873 | 11 |
| 1  | -21 | -7 | 6.88324 | 2.66621 | 13 |
| -1 | -21 | 7  | 9.18441 | 3.03774 | 13 |
| -1 | 21  | 7  | 5.77490 | 2.61010 | 10 |
| 0  | 21  | 7  | 60.9923 | 5.90005 | 10 |
| -1 | -21 | -7 | 3.48971 | 2.29139 | 13 |
| -1 | 21  | -7 | 6.42546 | 0.86256 | 6  |
| 1  | 21  | 7  | 2.05805 | 3.02927 | 10 |
| -1 | 21  | -7 | 5.25340 | 1.49648 | 9  |
| -2 | 21  | -7 | 17.4274 | 1.83626 | 9  |
| -2 | 21  | -7 | 15.5081 | 1.23037 | 6  |
| 2  | 21  | 7  | 10.6441 | 3.06652 | 10 |
| 3  | 21  | 7  | 17.7774 | 3.36192 | 10 |
| 5  | -22 | -7 | 2.23465 | 1.65929 | 13 |
| -5 | -22 | 7  | 3.62623 | 1.66179 | 13 |



|    |     |    |         |         |    |
|----|-----|----|---------|---------|----|
| 5  | 22  | -7 | 3.86038 | 2.17144 | 10 |
| 4  | -22 | -7 | 13.8706 | 2.70205 | 13 |
| -4 | -22 | 7  | 17.0195 | 2.77591 | 13 |
| 4  | 22  | -7 | 14.7936 | 2.74239 | 10 |
| 3  | -22 | -7 | 45.3663 | 4.74316 | 13 |
| 3  | 22  | -7 | 45.6999 | 4.24908 | 11 |
| -3 | 22  | 7  | 39.1492 | 2.73851 | 11 |
| -3 | 22  | 7  | 37.2798 | 2.75890 | 11 |
| -2 | -22 | 7  | 12.1009 | 3.32001 | 13 |
| 2  | -22 | -7 | 15.7561 | 3.09621 | 13 |
| -2 | 22  | 7  | 13.5412 | 2.08495 | 11 |
| -1 | -22 | 7  | 32.7461 | 4.61837 | 13 |
| 1  | -22 | -7 | 32.6575 | 4.58249 | 13 |
| -1 | 22  | 7  | 31.8007 | 4.57454 | 10 |
| 0  | -22 | -7 | 27.7911 | 5.29638 | 13 |
| -1 | -22 | -7 | 2.59876 | 2.45699 | 13 |
| 1  | 22  | 7  | 0.74970 | 2.73821 | 10 |
| -1 | 22  | -7 | 0.32291 | 1.02846 | 9  |
| -1 | 22  | -7 | 2.10317 | 0.51821 | 6  |
| 2  | 22  | 7  | 11.5017 | 2.75014 | 10 |
| -2 | 22  | -7 | 9.22510 | 1.20603 | 9  |
| -2 | 22  | -7 | 10.6255 | 0.92325 | 6  |
| -2 | 22  | -7 | 10.4852 | 1.05686 | 6  |
| 3  | 22  | 7  | 21.3419 | 3.35136 | 10 |
| 4  | -23 | -7 | 17.0362 | 2.99752 | 13 |
| -4 | -23 | 7  | 18.7140 | 2.78186 | 13 |
| 4  | 23  | -7 | 12.4290 | 2.02314 | 11 |
| 4  | 23  | -7 | 14.3270 | 2.62810 | 10 |
| 3  | -23 | -7 | 8.59367 | 2.28229 | 13 |
| -3 | -23 | 7  | 6.29068 | 2.25857 | 13 |
| 3  | 23  | -7 | 3.90930 | 1.55937 | 11 |
| -2 | -23 | 7  | 2.04273 | 2.67392 | 13 |
| 2  | -23 | -7 | 4.87116 | 2.22648 | 13 |
| -2 | 23  | 7  | 4.75339 | 1.20312 | 11 |
| 1  | -23 | -7 | 15.3769 | 2.71267 | 13 |
| -1 | -23 | 7  | 15.2755 | 3.01253 | 13 |
| -1 | 23  | 7  | 20.0538 | 2.62302 | 11 |
| -1 | 23  | 7  | 13.9944 | 2.56723 | 10 |
| 0  | -23 | -7 | 2.63036 | 2.14385 | 13 |
| 0  | 23  | 7  | 4.08338 | 2.68626 | 10 |
| -1 | -23 | -7 | 2.96766 | 2.16641 | 13 |
| -1 | 23  | -7 | 2.80706 | 1.15943 | 9  |
| 1  | 23  | 7  | 2.63339 | 2.45904 | 10 |
| 2  | 23  | 7  | 21.6593 | 3.68430 | 10 |
| -2 | 23  | -7 | 12.8500 | 1.36264 | 9  |
| 4  | -24 | -7 | 4.28752 | 1.68718 | 13 |
| -4 | -24 | 7  | 2.99512 | 1.59084 | 13 |
| 3  | -24 | -7 | 9.38897 | 2.11704 | 13 |
| -3 | -24 | 7  | 10.9089 | 2.20387 | 13 |
| 3  | 24  | -7 | 9.54971 | 1.36848 | 11 |

|    |     |    |         |         |    |
|----|-----|----|---------|---------|----|
| 3  | 24  | -7 | 9.42930 | 1.33514 | 11 |
| 2  | -24 | -7 | 19.8459 | 3.29440 | 13 |
| -2 | -24 | 7  | 15.1805 | 2.58086 | 13 |
| -1 | -24 | 7  | 20.0101 | 3.36013 | 13 |
| 1  | -24 | -7 | 22.3059 | 4.06157 | 13 |
| -1 | 24  | 7  | 19.7149 | 2.27776 | 11 |
| 0  | -24 | -7 | 5.52494 | 1.96659 | 13 |
| 0  | 24  | 7  | 7.02700 | 2.16671 | 10 |
| 1  | 24  | 7  | 2.63298 | 1.94380 | 10 |
| 2  | 24  | 7  | 4.46950 | 2.26654 | 10 |
| -3 | -25 | 7  | 30.4173 | 3.36658 | 13 |
| 3  | -25 | -7 | 28.9877 | 3.61371 | 13 |
| 2  | -25 | -7 | 12.6626 | 2.26293 | 13 |
| -2 | -25 | 7  | 19.6129 | 2.82227 | 13 |
| -1 | -25 | 7  | 25.6185 | 3.42683 | 13 |
| 1  | -25 | -7 | 20.2853 | 3.14987 | 13 |
| -1 | 25  | 7  | 23.0015 | 1.79265 | 11 |
| -1 | 25  | 7  | 21.3901 | 1.86117 | 11 |
| 0  | -25 | -7 | 2.57157 | 1.59021 | 13 |
| 10 | 0   | -8 | -0.4968 | 2.31054 | 13 |
| 9  | 0   | -8 | 2.49271 | 3.26550 | 13 |
| -9 | 0   | 8  | 2.81513 | 1.98466 | 10 |
| 8  | 0   | -8 | 3.54701 | 3.62397 | 13 |
| -8 | 0   | 8  | 4.86598 | 2.50702 | 10 |
| 7  | 0   | -8 | 64.1035 | 7.94849 | 13 |
| -7 | 0   | 8  | 65.8751 | 6.84589 | 10 |
| -6 | 0   | 8  | 43.8391 | 5.25390 | 10 |
| -5 | 0   | 8  | 1.16818 | 2.98298 | 1  |
| -4 | 0   | 8  | 1062.09 | 65.9772 | 1  |
| -4 | 0   | 8  | 993.576 | 66.3704 | 5  |
| -3 | 0   | 8  | 40.0155 | 6.06643 | 1  |
| 1  | 0   | -8 | 63.5654 | 6.35063 | 5  |
| 0  | 0   | -8 | 18.0648 | 3.26098 | 5  |
| -2 | 0   | -8 | 0.30344 | 1.80310 | 1  |
| -3 | 0   | -8 | 0.40012 | 1.47937 | 8  |
| -4 | 0   | -8 | 75.7460 | 6.81855 | 12 |
| -4 | 0   | -8 | 74.0013 | 5.79586 | 8  |
| -5 | 0   | -8 | 0.14515 | 1.98604 | 12 |
| -5 | 0   | -8 | -0.1853 | 1.30410 | 8  |
| 5  | 0   | 8  | 1.66186 | 5.26586 | 13 |
| 6  | 0   | 8  | 33.0853 | 5.11612 | 13 |
| -6 | 0   | -8 | 28.3782 | 2.82054 | 8  |
| 7  | 0   | 8  | -0.2193 | 2.58173 | 13 |
| 10 | -1  | -8 | -1.6323 | 2.27624 | 13 |
| 10 | 1   | -8 | 3.76179 | 2.44947 | 13 |
| 9  | -1  | -8 | -3.9342 | 3.00843 | 13 |
| -9 | -1  | 8  | 3.64225 | 1.90797 | 10 |
| -9 | 1   | 8  | 1.43293 | 1.12642 | 11 |
| 9  | 1   | -8 | 4.98884 | 3.08662 | 13 |
| 9  | 1   | -8 | 2.75876 | 3.39486 | 13 |

|    |    |    |         |         |    |
|----|----|----|---------|---------|----|
| -8 | -1 | 8  | 46.9393 | 5.41682 | 10 |
| 8  | -1 | -8 | 47.7864 | 6.96997 | 13 |
| 8  | 1  | -8 | 44.9941 | 7.12698 | 13 |
| -8 | 1  | 8  | 51.7878 | 5.25382 | 10 |
| 7  | -1 | -8 | 56.2749 | 7.28680 | 13 |
| -7 | 1  | 8  | 62.0004 | 6.77131 | 10 |
| 7  | 1  | -8 | 87.6075 | 7.61094 | 13 |
| -6 | -1 | 8  | 13.7910 | 4.29342 | 1  |
| -6 | -1 | 8  | 13.6777 | 3.09624 | 10 |
| -6 | 1  | 8  | 12.5921 | 3.09788 | 10 |
| 6  | 1  | -8 | 15.8917 | 4.46086 | 13 |
| -5 | -1 | 8  | 47.6513 | 7.16847 | 1  |
| -4 | -1 | 8  | 59.0559 | 7.61507 | 1  |
| -4 | -1 | 8  | 58.7542 | 7.80570 | 5  |
| -3 | -1 | 8  | 39.3728 | 6.17356 | 1  |
| 1  | -1 | -8 | 449.285 | 32.6706 | 5  |
| 1  | 1  | -8 | 550.140 | 32.7920 | 5  |
| 0  | -1 | -8 | 690.178 | 45.7536 | 5  |
| 0  | 1  | -8 | 751.475 | 45.1806 | 5  |
| -1 | -1 | -8 | 110.723 | 7.86664 | 5  |
| -2 | -1 | -8 | 86.4118 | 7.69109 | 1  |
| -2 | 1  | -8 | 81.6932 | 6.68271 | 4  |
| -2 | 1  | -8 | 80.9657 | 6.97144 | 1  |
| -3 | -1 | -8 | 23.0100 | 2.77979 | 8  |
| -3 | 1  | -8 | 23.8022 | 2.96003 | 8  |
| -4 | -1 | -8 | 3.51458 | 2.19194 | 10 |
| -4 | -1 | -8 | 2.82772 | 1.57727 | 8  |
| -4 | 1  | -8 | 5.92222 | 2.39519 | 12 |
| -4 | 1  | -8 | 1.50215 | 1.38063 | 8  |
| 4  | 1  | 8  | -3.7277 | 3.67259 | 13 |
| -5 | -1 | -8 | 35.7423 | 3.56828 | 8  |
| -5 | 1  | -8 | 39.3768 | 3.08629 | 11 |
| 5  | 1  | 8  | 30.8566 | 5.62557 | 13 |
| -5 | 1  | -8 | 36.7848 | 4.89106 | 12 |
| -5 | 1  | -8 | 34.4414 | 3.31340 | 8  |
| -6 | -1 | -8 | 21.3036 | 2.55283 | 8  |
| 6  | 1  | 8  | 21.5651 | 4.40019 | 13 |
| -6 | 1  | -8 | 22.5414 | 2.50110 | 8  |
| -7 | -1 | -8 | 2.64467 | 1.02183 | 8  |
| 7  | 1  | 8  | 4.24572 | 2.42253 | 13 |
| 10 | -2 | -8 | 4.91949 | 2.51644 | 13 |
| 10 | 2  | -8 | 7.11517 | 2.53243 | 13 |
| -9 | -2 | 8  | 7.33363 | 2.20982 | 10 |
| 9  | -2 | -8 | 4.33571 | 3.29460 | 13 |
| 9  | 2  | -8 | 7.03434 | 3.31808 | 13 |
| -9 | 2  | 8  | 4.91633 | 1.16292 | 11 |
| -8 | -2 | 8  | 88.0453 | 8.28007 | 10 |
| 8  | -2 | -8 | 114.055 | 9.21817 | 13 |
| -8 | 2  | 8  | 114.247 | 8.05699 | 10 |
| 8  | 2  | -8 | 78.0741 | 9.35737 | 13 |

|    |    |    |         |         |    |
|----|----|----|---------|---------|----|
| -7 | -2 | 8  | 119.509 | 9.47550 | 10 |
| 7  | -2 | -8 | 107.208 | 9.64853 | 13 |
| -7 | 2  | 8  | 112.115 | 9.27262 | 10 |
| 7  | 2  | -8 | 119.435 | 10.4307 | 13 |
| -6 | -2 | 8  | 29.6884 | 4.62870 | 10 |
| -6 | -2 | 8  | 32.4054 | 6.50369 | 1  |
| 6  | -2 | -8 | 21.1522 | 3.88679 | 13 |
| -6 | 2  | 8  | 28.7913 | 4.30590 | 10 |
| 6  | 2  | -8 | 25.1592 | 5.39732 | 13 |
| -5 | -2 | 8  | 20.8762 | 5.31151 | 1  |
| -4 | 2  | 8  | 35.0173 | 5.82835 | 5  |
| -3 | -2 | 8  | 28.6561 | 5.60031 | 1  |
| -3 | 2  | 8  | 15.9111 | 4.76912 | 5  |
| 1  | 2  | -8 | 613.672 | 39.2327 | 5  |
| 0  | -2 | -8 | 460.567 | 31.4554 | 5  |
| 0  | 2  | -8 | 498.098 | 29.9741 | 5  |
| -1 | -2 | -8 | 56.7956 | 5.09696 | 5  |
| -1 | -2 | -8 | 54.6017 | 6.40821 | 1  |
| -1 | 2  | -8 | 44.0994 | 5.15030 | 1  |
| -2 | -2 | -8 | 4.19293 | 2.70993 | 1  |
| -2 | 2  | -8 | 7.36076 | 1.95056 | 8  |
| -2 | 2  | -8 | 7.25262 | 1.96333 | 4  |
| -3 | -2 | -8 | 5.36454 | 2.33368 | 1  |
| -3 | -2 | -8 | 3.55259 | 1.55804 | 8  |
| -3 | 2  | -8 | 5.57177 | 1.65626 | 8  |
| -4 | -2 | -8 | 2.64917 | 1.61222 | 8  |
| -4 | -2 | -8 | 3.93468 | 2.28423 | 10 |
| 4  | 2  | 8  | -3.1252 | 3.78587 | 13 |
| -4 | 2  | -8 | 2.83821 | 1.64117 | 8  |
| -5 | -2 | -8 | 22.0570 | 2.96610 | 8  |
| -5 | 2  | -8 | 21.3815 | 1.74812 | 11 |
| -5 | 2  | -8 | 29.6675 | 4.43935 | 12 |
| -5 | 2  | -8 | 23.7424 | 2.57012 | 8  |
| 5  | 2  | 8  | 20.0884 | 4.09358 | 13 |
| -6 | -2 | -8 | 2.89498 | 1.04410 | 11 |
| -6 | -2 | -8 | 3.29485 | 1.49660 | 8  |
| -6 | 2  | -8 | 6.37243 | 1.20019 | 8  |
| -7 | -2 | -8 | 6.01714 | 1.33470 | 8  |
| 7  | 2  | 8  | 7.81750 | 3.13784 | 13 |
| 10 | -3 | -8 | 12.9192 | 2.78279 | 13 |
| 10 | 3  | -8 | 5.88919 | 2.51124 | 13 |
| -9 | -3 | 8  | 20.5349 | 3.28367 | 10 |
| 9  | -3 | -8 | 16.0784 | 3.63832 | 13 |
| -9 | 3  | 8  | 13.2954 | 2.27354 | 7  |
| -9 | 3  | 8  | 12.8392 | 1.58116 | 11 |
| -8 | -3 | 8  | 117.591 | 8.76521 | 10 |
| 8  | -3 | -8 | 93.7704 | 8.90357 | 13 |
| 8  | 3  | -8 | 113.276 | 10.4143 | 13 |
| -8 | 3  | 8  | 88.9642 | 7.69057 | 10 |
| -7 | -3 | 8  | 305.053 | 23.4714 | 1  |

|    |    |    |         |         |    |
|----|----|----|---------|---------|----|
| -7 | -3 | 8  | 294.492 | 21.3401 | 10 |
| 7  | -3 | -8 | 342.245 | 21.3572 | 13 |
| 7  | 3  | -8 | 290.129 | 21.4809 | 13 |
| -7 | 3  | 8  | 348.149 | 21.1699 | 10 |
| -6 | -3 | 8  | 16.0029 | 4.83547 | 1  |
| 6  | -3 | -8 | 22.2994 | 3.53897 | 13 |
| -6 | -3 | 8  | 18.4223 | 3.60695 | 10 |
| -6 | 3  | 8  | 22.3402 | 3.84869 | 10 |
| 6  | 3  | -8 | 17.8122 | 4.13426 | 13 |
| -5 | -3 | 8  | 36.7282 | 7.54517 | 1  |
| -4 | 3  | 8  | 22.1146 | 4.81163 | 5  |
| -3 | -3 | 8  | 0.68831 | 2.74400 | 1  |
| -3 | 3  | 8  | 8.06229 | 3.68875 | 5  |
| 1  | 3  | -8 | 55.9540 | 5.38237 | 5  |
| 0  | -3 | -8 | 1169.31 | 73.3964 | 5  |
| -1 | -3 | -8 | 4.56705 | 2.17702 | 5  |
| -1 | -3 | -8 | 5.28124 | 3.04481 | 1  |
| -1 | 3  | -8 | 4.27085 | 2.05169 | 1  |
| -1 | 3  | -8 | 3.51400 | 1.44275 | 4  |
| -2 | -3 | -8 | 135.790 | 11.8480 | 1  |
| -2 | 3  | -8 | 157.936 | 10.3467 | 4  |
| -2 | 3  | -8 | 154.678 | 9.92134 | 8  |
| -3 | -3 | -8 | 31.3883 | 4.67678 | 10 |
| -3 | -3 | -8 | 34.7803 | 5.07670 | 1  |
| -3 | -3 | -8 | 39.0368 | 3.76263 | 8  |
| -3 | 3  | -8 | 46.3104 | 3.68640 | 8  |
| -4 | -3 | -8 | 10.0739 | 2.72987 | 10 |
| -4 | -3 | -8 | 11.9506 | 2.43606 | 8  |
| -4 | 3  | -8 | 16.5707 | 2.46488 | 8  |
| 4  | 3  | 8  | 9.81785 | 3.68898 | 13 |
| -4 | 3  | -8 | 18.4137 | 3.47313 | 12 |
| -5 | -3 | -8 | 45.8154 | 4.52063 | 8  |
| -5 | -3 | -8 | 43.6928 | 4.56517 | 10 |
| 5  | 3  | 8  | 49.9011 | 7.31126 | 13 |
| -5 | 3  | -8 | 43.2978 | 3.75546 | 8  |
| -5 | 3  | -8 | 46.7612 | 5.39114 | 12 |
| -6 | -3 | -8 | 20.4814 | 3.00804 | 8  |
| -6 | 3  | -8 | 17.2148 | 2.81223 | 12 |
| 6  | 3  | 8  | 21.2330 | 4.47588 | 13 |
| -7 | -3 | -8 | 1.02766 | 1.14833 | 8  |
| 7  | 3  | 8  | -0.0395 | 2.39422 | 13 |
| -7 | 3  | -8 | 0.44122 | 0.81674 | 9  |
| 10 | -4 | -8 | 5.60696 | 2.32665 | 13 |
| 10 | 4  | -8 | 0.31535 | 2.66158 | 13 |
| -9 | -4 | 8  | 24.5246 | 3.54894 | 10 |
| 9  | -4 | -8 | 16.7128 | 3.75798 | 13 |
| 9  | 4  | -8 | 25.7155 | 4.09636 | 13 |
| -9 | 4  | 8  | 17.9584 | 2.95438 | 7  |
| -9 | 4  | 8  | 17.9083 | 1.90617 | 11 |
| -8 | -4 | 8  | 5.73504 | 2.83181 | 10 |

|    |    |    |         |         |    |
|----|----|----|---------|---------|----|
| 8  | -4 | -8 | 12.3773 | 4.19512 | 13 |
| -8 | 4  | 8  | 11.2575 | 2.24636 | 10 |
| 8  | 4  | -8 | 4.93346 | 3.29308 | 13 |
| 8  | 4  | -8 | 7.99053 | 3.70494 | 13 |
| 7  | -4 | -8 | 48.7426 | 6.53277 | 13 |
| -7 | -4 | 8  | 34.1433 | 5.19251 | 10 |
| -7 | -4 | 8  | 39.9854 | 8.02652 | 1  |
| 7  | 4  | -8 | 34.3349 | 5.59911 | 13 |
| -7 | 4  | 8  | 50.3633 | 5.28155 | 10 |
| -6 | -4 | 8  | 46.9398 | 7.70778 | 1  |
| -6 | -4 | 8  | 39.0210 | 5.63559 | 10 |
| 6  | 4  | -8 | 54.5378 | 6.41187 | 13 |
| 5  | -4 | -8 | 153.151 | 12.8788 | 2  |
| -5 | -4 | 8  | 132.024 | 12.9504 | 1  |
| -4 | -4 | 8  | 98.5506 | 10.6267 | 1  |
| -3 | 4  | 8  | 26.6163 | 4.86916 | 5  |
| 1  | 4  | -8 | 195.576 | 13.3927 | 5  |
| 0  | -4 | -8 | 72.0388 | 7.21563 | 5  |
| -1 | -4 | -8 | 2.26190 | 2.94607 | 1  |
| -1 | 4  | -8 | 9.31040 | 1.91469 | 4  |
| -1 | 4  | -8 | 7.41365 | 2.09408 | 1  |
| -2 | -4 | -8 | 11.2413 | 2.04436 | 8  |
| -2 | 4  | -8 | 5.57682 | 1.55601 | 4  |
| -2 | 4  | -8 | 5.29762 | 1.53000 | 8  |
| -3 | -4 | -8 | 47.6102 | 4.46088 | 8  |
| -3 | -4 | -8 | 53.4732 | 6.37778 | 1  |
| -3 | -4 | -8 | 55.4600 | 5.28228 | 10 |
| -3 | 4  | -8 | 43.1512 | 4.01625 | 8  |
| -4 | -4 | -8 | 263.286 | 16.8263 | 8  |
| -4 | -4 | -8 | 272.014 | 17.2487 | 10 |
| -4 | 4  | -8 | 241.717 | 17.0898 | 12 |
| 4  | 4  | 8  | 273.143 | 18.4802 | 13 |
| -4 | 4  | -8 | 249.311 | 15.8713 | 11 |
| -4 | 4  | -8 | 248.222 | 16.2949 | 8  |
| -5 | -4 | -8 | 51.1596 | 4.88843 | 10 |
| -5 | -4 | -8 | 50.1436 | 4.74989 | 8  |
| 5  | 4  | 8  | 57.1501 | 7.06421 | 13 |
| -5 | 4  | -8 | 55.8601 | 4.14350 | 8  |
| -5 | 4  | -8 | 57.6014 | 5.79810 | 12 |
| -6 | -4 | -8 | 11.1487 | 1.98566 | 8  |
| 6  | 4  | 8  | 7.84929 | 3.40490 | 13 |
| -6 | 4  | -8 | 10.1307 | 2.45613 | 12 |
| -7 | -4 | -8 | 107.204 | 7.00979 | 8  |
| -7 | 4  | -8 | 102.813 | 6.73966 | 9  |
| 7  | 4  | 8  | 104.010 | 8.33335 | 13 |
| -9 | -5 | 8  | 0.66832 | 2.06712 | 10 |
| 9  | -5 | -8 | 1.73812 | 2.83094 | 13 |
| -9 | 5  | 8  | 1.91527 | 1.68575 | 7  |
| 9  | 5  | -8 | -0.9637 | 3.57968 | 13 |
| -8 | -5 | 8  | 43.8701 | 5.54791 | 10 |

|    |    |    |         |         |    |
|----|----|----|---------|---------|----|
| 8  | -5 | -8 | 45.6975 | 6.17635 | 13 |
| -8 | 5  | 8  | 45.1072 | 3.71296 | 11 |
| 8  | 5  | -8 | 45.3442 | 6.74238 | 13 |
| 7  | -5 | -8 | 43.6877 | 5.84841 | 13 |
| -7 | -5 | 8  | 65.0271 | 8.58611 | 1  |
| -7 | -5 | 8  | 59.9842 | 6.18563 | 10 |
| -7 | 5  | 8  | 47.6552 | 5.35920 | 10 |
| 6  | -5 | -8 | 365.903 | 24.6574 | 13 |
| -6 | -5 | 8  | 411.302 | 28.0063 | 1  |
| -6 | -5 | 8  | 380.526 | 25.2693 | 10 |
| -6 | 5  | 8  | 349.189 | 24.5184 | 10 |
| 6  | 5  | -8 | 386.335 | 25.1508 | 13 |
| -5 | -5 | 8  | 140.393 | 12.9213 | 1  |
| 5  | -5 | -8 | 122.059 | 12.1449 | 2  |
| -4 | -5 | 8  | 41.7328 | 6.80844 | 1  |
| 4  | -5 | -8 | 32.6045 | 5.96915 | 2  |
| 3  | -5 | -8 | 483.980 | 32.3019 | 2  |
| -3 | 5  | 8  | 486.927 | 32.6480 | 5  |
| -2 | 5  | 8  | 13.1566 | 3.76351 | 5  |
| 1  | 5  | -8 | 291.603 | 18.6592 | 5  |
| 0  | -5 | -8 | 33.9151 | 5.05422 | 5  |
| -1 | -5 | -8 | 4.83840 | 2.12292 | 5  |
| -1 | -5 | -8 | 5.58473 | 3.05121 | 1  |
| -1 | 5  | -8 | 4.99775 | 1.54264 | 4  |
| -2 | -5 | -8 | 37.7379 | 6.06724 | 1  |
| -2 | -5 | -8 | 33.0923 | 3.46888 | 8  |
| -2 | 5  | -8 | 27.6380 | 2.91582 | 8  |
| -2 | 5  | -8 | 22.5838 | 2.61283 | 4  |
| -3 | -5 | -8 | 34.5061 | 3.72898 | 8  |
| -3 | -5 | -8 | 35.5193 | 4.50017 | 10 |
| -3 | -5 | -8 | 34.2473 | 5.25314 | 1  |
| -3 | 5  | -8 | 26.2955 | 3.01327 | 8  |
| -4 | -5 | -8 | 11.6634 | 2.33334 | 8  |
| -4 | -5 | -8 | 15.4433 | 2.94326 | 10 |
| -4 | 5  | -8 | 13.6143 | 2.02210 | 8  |
| 4  | 5  | 8  | 13.1509 | 4.47985 | 13 |
| -4 | 5  | -8 | 14.5366 | 2.95614 | 12 |
| -5 | -5 | -8 | 21.8007 | 3.84805 | 10 |
| -5 | -5 | -8 | 24.4516 | 3.85101 | 8  |
| -5 | 5  | -8 | 21.8215 | 3.10811 | 9  |
| -5 | 5  | -8 | 26.7828 | 4.03297 | 12 |
| 5  | 5  | 8  | 22.3428 | 4.47374 | 13 |
| -6 | -5 | -8 | 2.50627 | 1.65968 | 8  |
| -6 | 5  | -8 | 1.62266 | 0.92969 | 9  |
| 6  | 5  | 8  | 4.47935 | 3.34350 | 13 |
| -6 | 5  | -8 | 2.20909 | 2.10193 | 12 |
| -6 | 5  | -8 | 1.70105 | 0.69348 | 6  |
| -7 | -5 | -8 | 5.58257 | 1.46656 | 8  |
| 7  | 5  | 8  | 5.45397 | 2.63200 | 13 |
| 9  | -6 | -8 | 8.42092 | 3.07148 | 13 |

|    |    |    |         |         |    |
|----|----|----|---------|---------|----|
| 9  | 6  | -8 | 17.2268 | 3.91024 | 13 |
| -9 | 6  | 8  | 9.53135 | 2.08887 | 7  |
| -8 | -6 | 8  | 127.027 | 10.3421 | 10 |
| 8  | -6 | -8 | 136.781 | 10.7596 | 13 |
| -8 | 6  | 8  | 128.607 | 9.35477 | 7  |
| -8 | 6  | 8  | 122.958 | 8.51958 | 11 |
| 8  | 6  | -8 | 145.676 | 11.0552 | 13 |
| -7 | -6 | 8  | 132.466 | 12.1529 | 1  |
| -7 | -6 | 8  | 122.553 | 9.52369 | 10 |
| 7  | -6 | -8 | 91.0466 | 9.20197 | 13 |
| 7  | 6  | -8 | 118.213 | 9.51582 | 13 |
| -7 | 6  | 8  | 89.1265 | 8.05913 | 10 |
| 7  | 6  | -8 | 114.867 | 9.21905 | 13 |
| -6 | -6 | 8  | 191.157 | 16.8792 | 1  |
| 6  | -6 | -8 | 226.381 | 13.5537 | 13 |
| -6 | -6 | 8  | 170.082 | 13.9241 | 10 |
| 6  | 6  | -8 | 165.260 | 13.9889 | 13 |
| 5  | -6 | -8 | 288.459 | 21.1085 | 2  |
| -5 | -6 | 8  | 267.580 | 21.5952 | 1  |
| -5 | 6  | 8  | 274.948 | 18.9413 | 10 |
| -4 | -6 | 8  | 21.5419 | 5.41298 | 1  |
| 4  | -6 | -8 | 17.8836 | 4.31628 | 2  |
| 3  | -6 | -8 | 169.936 | 13.6406 | 2  |
| -3 | 6  | 8  | 167.431 | 13.1198 | 5  |
| 2  | -6 | -8 | 289.501 | 19.9050 | 2  |
| 2  | 6  | -8 | 261.105 | 18.8934 | 5  |
| -2 | 6  | 8  | 292.423 | 20.7980 | 5  |
| 0  | 6  | -8 | 104.583 | 7.60327 | 4  |
| -1 | -6 | -8 | 37.0199 | 5.51180 | 5  |
| -1 | -6 | -8 | 33.8833 | 6.19425 | 1  |
| -2 | -6 | -8 | 63.3961 | 5.07068 | 8  |
| -2 | -6 | -8 | 67.6392 | 7.90048 | 1  |
| -2 | 6  | -8 | 57.6694 | 4.53884 | 8  |
| -2 | 6  | -8 | 54.8228 | 4.19968 | 4  |
| -3 | -6 | -8 | 68.0040 | 7.43675 | 1  |
| -3 | -6 | -8 | 70.9258 | 5.67898 | 8  |
| -3 | -6 | -8 | 68.3581 | 6.13807 | 10 |
| -3 | 6  | -8 | 58.1171 | 4.37816 | 11 |
| -3 | 6  | -8 | 59.7905 | 4.69994 | 8  |
| -3 | 6  | -8 | 60.5526 | 5.86471 | 12 |
| -4 | -6 | -8 | 4.79714 | 2.93092 | 1  |
| -4 | -6 | -8 | 4.43052 | 1.99198 | 8  |
| -4 | -6 | -8 | 5.17147 | 2.37214 | 10 |
| -4 | 6  | -8 | 6.24375 | 1.38111 | 8  |
| 4  | 6  | 8  | 0.76525 | 4.05854 | 13 |
| -4 | 6  | -8 | 6.53014 | 1.31794 | 9  |
| -4 | 6  | -8 | 5.51490 | 3.00171 | 12 |
| -5 | -6 | -8 | 60.1331 | 5.54143 | 8  |
| -5 | -6 | -8 | 63.3023 | 6.18685 | 10 |
| -5 | 6  | -8 | 64.5732 | 6.10292 | 12 |



|    |    |    |         |         |    |
|----|----|----|---------|---------|----|
| 5  | 6  | 8  | 64.7468 | 7.73494 | 13 |
| -5 | 6  | -8 | 71.2704 | 4.32348 | 6  |
| -5 | 6  | -8 | 63.5759 | 4.63618 | 9  |
| -6 | -6 | -8 | 0.97753 | 1.69317 | 8  |
| -6 | -6 | -8 | 1.65284 | 1.72906 | 10 |
| -6 | 6  | -8 | 3.63837 | 2.17694 | 12 |
| -6 | 6  | -8 | 3.28238 | 1.08940 | 9  |
| -6 | 6  | -8 | 4.29273 | 0.61406 | 6  |
| 6  | 6  | 8  | 1.51642 | 3.26820 | 13 |
| -7 | 6  | -8 | 7.51887 | 0.91010 | 9  |
| 7  | 6  | 8  | 5.97948 | 2.57653 | 13 |
| 9  | -7 | -8 | 54.1657 | 6.27211 | 13 |
| -9 | -7 | 8  | 59.0561 | 4.98253 | 10 |
| 9  | 7  | -8 | 56.6871 | 5.65908 | 13 |
| -9 | 7  | 8  | 50.1056 | 4.58253 | 7  |
| -8 | -7 | 8  | 47.7057 | 5.69145 | 10 |
| 8  | -7 | -8 | 42.1717 | 6.42700 | 13 |
| 8  | 7  | -8 | 62.3022 | 7.26993 | 13 |
| -8 | 7  | 8  | 47.2293 | 4.63350 | 7  |
| -8 | 7  | 8  | 51.7899 | 3.72720 | 11 |
| 7  | -7 | -8 | 169.714 | 11.6308 | 13 |
| -7 | -7 | 8  | 135.855 | 13.6220 | 1  |
| -7 | -7 | 8  | 139.210 | 11.4475 | 10 |
| 7  | 7  | -8 | 134.272 | 11.9445 | 13 |
| 6  | -7 | -8 | 33.6422 | 5.32182 | 13 |
| -6 | 7  | 8  | 31.8636 | 4.09768 | 10 |
| -5 | -7 | 8  | 2.10248 | 3.69022 | 1  |
| 5  | -7 | -8 | 2.86794 | 3.34382 | 2  |
| 4  | -7 | -8 | 37.1405 | 6.12208 | 2  |
| 3  | -7 | -8 | 88.5831 | 9.42134 | 2  |
| -3 | 7  | 8  | 103.555 | 9.37112 | 5  |
| 2  | -7 | -8 | 49.6433 | 6.57982 | 2  |
| 2  | 7  | -8 | 45.1877 | 4.92715 | 5  |
| -2 | 7  | 8  | 62.9980 | 7.31252 | 5  |
| 1  | -7 | -8 | 330.160 | 23.0924 | 2  |
| 0  | 7  | -8 | 24.4277 | 2.88192 | 4  |
| -1 | -7 | -8 | 27.5464 | 4.60106 | 5  |
| -1 | -7 | -8 | 28.2148 | 5.40694 | 1  |
| -1 | 7  | -8 | 23.2207 | 3.01140 | 8  |
| -1 | 7  | -8 | 19.0022 | 2.49275 | 4  |
| -2 | -7 | -8 | 24.6383 | 5.38400 | 1  |
| -2 | 7  | -8 | 21.8861 | 2.54406 | 8  |
| -3 | -7 | -8 | 11.6030 | 2.29254 | 8  |
| -3 | -7 | -8 | 14.9275 | 4.07757 | 1  |
| -3 | -7 | -8 | 12.1763 | 2.90035 | 10 |
| -3 | 7  | -8 | 6.88575 | 1.38322 | 8  |
| -3 | 7  | -8 | 5.20089 | 0.78173 | 11 |
| -3 | 7  | -8 | 8.97965 | 1.16878 | 11 |
| 3  | 7  | 8  | 15.4060 | 3.57767 | 13 |
| -4 | -7 | -8 | 11.0454 | 2.40662 | 8  |

|    |    |    |         |         |    |
|----|----|----|---------|---------|----|
| -4 | -7 | -8 | 10.2017 | 3.75145 | 1  |
| -4 | -7 | -8 | 13.3288 | 3.01328 | 10 |
| 4  | 7  | 8  | 11.1754 | 3.73006 | 13 |
| -5 | -7 | -8 | 10.6874 | 2.61531 | 10 |
| -5 | -7 | -8 | 11.2606 | 2.49673 | 8  |
| 5  | 7  | 8  | 10.8327 | 4.74654 | 13 |
| -5 | 7  | -8 | 15.3662 | 1.30797 | 6  |
| -5 | 7  | -8 | 15.0228 | 3.00354 | 12 |
| -5 | 7  | -8 | 14.0735 | 1.68751 | 9  |
| -6 | -7 | -8 | 88.1479 | 6.61170 | 8  |
| -6 | -7 | -8 | 87.9843 | 6.67382 | 10 |
| 6  | 7  | 8  | 97.5226 | 8.58783 | 13 |
| -6 | 7  | -8 | 87.6560 | 6.98156 | 12 |
| -6 | 7  | -8 | 83.3080 | 5.42097 | 6  |
| -6 | 7  | -8 | 80.2596 | 5.62283 | 9  |
| -7 | 7  | -8 | 7.40526 | 0.85666 | 9  |
| 7  | 7  | 8  | 6.24901 | 2.51475 | 13 |
| -9 | -8 | 8  | 30.3234 | 4.02553 | 10 |
| 9  | -8 | -8 | 32.3933 | 4.56463 | 13 |
| -9 | 8  | 8  | 34.8858 | 3.42552 | 7  |
| 8  | -8 | -8 | 20.7996 | 3.73524 | 13 |
| -8 | 8  | 8  | 22.4892 | 3.22145 | 7  |
| -8 | 8  | 8  | 22.0647 | 2.08468 | 11 |
| 7  | -8 | -8 | 51.5817 | 6.69839 | 13 |
| -7 | 8  | 8  | 50.4053 | 4.05264 | 11 |
| -7 | 8  | 8  | 52.0937 | 4.75811 | 7  |
| 6  | -8 | -8 | 28.8603 | 5.37375 | 13 |
| -6 | 8  | 8  | 37.3845 | 4.44587 | 10 |
| 5  | -8 | -8 | 54.7416 | 8.53301 | 2  |
| -5 | -8 | 8  | 61.8455 | 8.96754 | 1  |
| -5 | 8  | 8  | 52.1723 | 5.96158 | 10 |
| 5  | 8  | -8 | 49.6642 | 6.24488 | 10 |
| 4  | -8 | -8 | 5.22229 | 3.41175 | 2  |
| 3  | -8 | -8 | 2.78291 | 3.40975 | 2  |
| 2  | -8 | -8 | 12.9805 | 4.10828 | 2  |
| -2 | 8  | 8  | 13.1635 | 4.10109 | 5  |
| 2  | 8  | -8 | 16.4538 | 2.45775 | 5  |
| 1  | -8 | -8 | 22.5175 | 4.41997 | 2  |
| -1 | 8  | 8  | 20.4682 | 4.96689 | 5  |
| 0  | -8 | -8 | 3.83925 | 3.07642 | 2  |
| 0  | 8  | -8 | 1.95400 | 1.34330 | 4  |
| -1 | -8 | -8 | 59.3333 | 8.31269 | 1  |
| -1 | 8  | -8 | 76.8671 | 5.52623 | 4  |
| -1 | 8  | -8 | 84.3436 | 5.54459 | 4  |
| -1 | 8  | -8 | 81.3148 | 5.64678 | 8  |
| -2 | -8 | -8 | 3.62494 | 3.92368 | 1  |
| -2 | 8  | -8 | 9.04030 | 1.53713 | 8  |
| -3 | -8 | -8 | 46.7834 | 5.65556 | 10 |
| -3 | -8 | -8 | 38.9862 | 4.70154 | 8  |
| -3 | -8 | -8 | 35.1798 | 7.35760 | 1  |

|    |    |    |         |         |    |
|----|----|----|---------|---------|----|
| 3  | 8  | 8  | 52.8585 | 7.48493 | 13 |
| -3 | 8  | -8 | 58.6911 | 5.67162 | 12 |
| -3 | 8  | -8 | 56.7501 | 3.75371 | 9  |
| -3 | 8  | -8 | 50.4322 | 3.89504 | 8  |
| -3 | 8  | -8 | 66.7614 | 6.35056 | 14 |
| -4 | -8 | -8 | 283.531 | 19.4555 | 8  |
| -4 | -8 | -8 | 293.949 | 20.0448 | 10 |
| -4 | -8 | -8 | 290.092 | 21.8119 | 1  |
| 4  | 8  | 8  | 288.756 | 20.5596 | 13 |
| -4 | 8  | -8 | 303.370 | 18.5681 | 9  |
| -4 | 8  | -8 | 321.292 | 19.8656 | 12 |
| -4 | 8  | -8 | 317.462 | 18.4377 | 6  |
| -5 | -8 | -8 | 19.0682 | 3.63280 | 10 |
| -5 | -8 | -8 | 16.4278 | 2.75914 | 8  |
| -5 | 8  | -8 | 15.1416 | 1.71373 | 9  |
| 5  | 8  | 8  | 15.2687 | 4.28673 | 13 |
| -5 | 8  | -8 | 13.9827 | 1.31417 | 6  |
| -5 | 8  | -8 | 14.1007 | 3.07119 | 12 |
| -6 | -8 | -8 | 4.63710 | 1.80533 | 10 |
| -6 | -8 | -8 | 6.03461 | 1.94057 | 8  |
| -6 | 8  | -8 | 2.32562 | 0.44293 | 6  |
| -6 | 8  | -8 | 1.05921 | 2.07413 | 12 |
| 6  | 8  | 8  | 4.89967 | 3.26137 | 13 |
| -6 | 8  | -8 | 3.05741 | 0.87433 | 9  |
| -6 | 8  | -8 | 2.17939 | 0.52201 | 6  |
| 7  | 8  | 8  | 30.5391 | 4.18074 | 13 |
| 9  | -9 | -8 | 7.68191 | 2.40479 | 13 |
| -9 | -9 | 8  | 3.04546 | 2.18122 | 10 |
| 8  | -9 | -8 | 52.4639 | 6.45365 | 13 |
| -8 | -9 | 8  | 59.1120 | 6.38105 | 10 |
| -8 | 9  | 8  | 63.8095 | 5.14196 | 7  |
| 7  | -9 | -8 | 63.3438 | 7.23592 | 13 |
| -7 | -9 | 8  | 84.2820 | 7.90947 | 10 |
| -7 | -9 | 8  | 82.4570 | 9.95947 | 1  |
| -7 | 9  | 8  | 77.7801 | 6.13521 | 7  |
| -7 | 9  | 8  | 77.9595 | 5.40035 | 11 |
| -6 | -9 | 8  | 112.738 | 11.8904 | 1  |
| 6  | -9 | -8 | 76.7838 | 8.10313 | 13 |
| -6 | -9 | 8  | 99.2200 | 8.49782 | 10 |
| -6 | 9  | 8  | 78.6498 | 6.86069 | 10 |
| 5  | -9 | -8 | 1.31072 | 3.56600 | 2  |
| -5 | -9 | 8  | 7.94397 | 4.51005 | 1  |
| 4  | -9 | -8 | 34.4003 | 6.51837 | 2  |
| 3  | -9 | -8 | 77.0422 | 8.46160 | 2  |
| 2  | -9 | -8 | 8.55908 | 3.43532 | 2  |
| 1  | -9 | -8 | 93.0991 | 9.36595 | 2  |
| -1 | 9  | 8  | 95.1907 | 9.72302 | 5  |
| 0  | -9 | -8 | 101.936 | 10.8614 | 1  |
| 0  | -9 | -8 | 106.183 | 10.4919 | 2  |
| 0  | 9  | -8 | 117.848 | 8.07928 | 4  |

|    |     |    |         |         |    |
|----|-----|----|---------|---------|----|
| 0  | 9   | -8 | 126.286 | 8.13333 | 4  |
| -1 | -9  | -8 | 68.5425 | 8.44351 | 1  |
| -1 | -9  | -8 | 72.9540 | 8.06463 | 2  |
| -1 | 9   | -8 | 61.1921 | 5.40093 | 4  |
| -2 | -9  | -8 | 47.2830 | 7.49757 | 1  |
| -2 | -9  | -8 | 58.1479 | 6.26353 | 10 |
| -2 | 9   | -8 | 58.9193 | 3.92471 | 11 |
| -3 | -9  | -8 | 10.5601 | 3.20836 | 10 |
| -3 | -9  | -8 | 9.84623 | 4.09012 | 1  |
| -3 | 9   | -8 | 17.4826 | 1.54252 | 6  |
| -3 | 9   | -8 | 21.9533 | 3.70908 | 12 |
| -3 | 9   | -8 | 19.2141 | 3.09690 | 14 |
| -3 | 9   | -8 | 18.3518 | 1.89889 | 9  |
| 3  | 9   | 8  | 9.85254 | 4.15866 | 13 |
| -4 | 9   | -8 | 11.7993 | 2.83148 | 12 |
| 4  | 9   | 8  | 20.9749 | 4.08813 | 13 |
| -4 | 9   | -8 | 14.9775 | 1.82044 | 9  |
| -4 | 9   | -8 | 12.4335 | 1.39724 | 6  |
| -5 | -9  | -8 | 19.0468 | 2.91313 | 8  |
| -5 | -9  | -8 | 16.3796 | 3.10609 | 10 |
| 5  | 9   | 8  | 14.2573 | 4.76108 | 13 |
| -5 | 9   | -8 | 21.5546 | 1.79163 | 9  |
| -5 | 9   | -8 | 20.2300 | 3.32550 | 12 |
| -5 | 9   | -8 | 18.9864 | 1.51876 | 6  |
| -6 | -9  | -8 | -0.3712 | 1.67786 | 8  |
| -6 | -9  | -8 | 0.71625 | 1.62817 | 10 |
| -6 | 9   | -8 | 0.18013 | 2.05670 | 12 |
| -6 | 9   | -8 | 1.25362 | 0.34728 | 6  |
| -6 | 9   | -8 | 1.13071 | 0.32501 | 6  |
| 6  | 9   | 8  | 3.62499 | 2.92108 | 13 |
| -6 | 9   | -8 | 1.00811 | 0.69419 | 9  |
| 7  | 9   | 8  | 35.2570 | 4.16041 | 13 |
| -9 | -10 | 8  | 36.5090 | 4.09528 | 10 |
| 8  | -10 | -8 | 21.0661 | 3.63980 | 13 |
| -8 | 10  | 8  | 22.8204 | 2.66293 | 7  |
| -7 | -10 | 8  | 51.8720 | 9.93994 | 1  |
| -7 | -10 | 8  | 43.9298 | 6.28719 | 10 |
| -7 | 10  | 8  | 63.4162 | 4.17764 | 11 |
| 6  | -10 | -8 | 173.825 | 12.0873 | 13 |
| -6 | -10 | 8  | 132.535 | 15.0772 | 1  |
| -6 | 10  | 8  | 176.847 | 11.4536 | 10 |
| 5  | -10 | -8 | 4.48210 | 3.16778 | 13 |
| -5 | -10 | 8  | 4.92440 | 4.68878 | 1  |
| 5  | 10  | -8 | 0.83457 | 2.99291 | 10 |
| -5 | 10  | 8  | 2.13220 | 2.16332 | 10 |
| 4  | -10 | -8 | 22.4412 | 5.26383 | 2  |
| -4 | 10  | 8  | 23.7897 | 4.29510 | 10 |
| 3  | -10 | -8 | 100.263 | 10.5989 | 2  |
| 2  | -10 | -8 | 21.6587 | 4.87130 | 2  |
| 1  | -10 | -8 | 197.429 | 15.8286 | 2  |

|    |     |    |         |         |    |
|----|-----|----|---------|---------|----|
| 0  | -10 | -8 | 320.579 | 22.2943 | 2  |
| 0  | -10 | -8 | 316.131 | 22.9422 | 1  |
| 0  | 10  | -8 | 278.732 | 19.6619 | 4  |
| -1 | -10 | -8 | 45.7604 | 7.28779 | 1  |
| -1 | -10 | -8 | 42.4883 | 6.34022 | 2  |
| -2 | -10 | -8 | 69.1700 | 8.88467 | 2  |
| -2 | -10 | -8 | 70.5791 | 9.10856 | 1  |
| -2 | -10 | -8 | 63.6355 | 7.03635 | 10 |
| -2 | 10  | -8 | 79.7694 | 4.74623 | 11 |
| -2 | 10  | -8 | 80.9673 | 6.55267 | 12 |
| -2 | 10  | -8 | 81.3468 | 5.15236 | 9  |
| -3 | -10 | -8 | 34.6361 | 5.16620 | 10 |
| -3 | -10 | -8 | 42.1683 | 7.08732 | 1  |
| -3 | 10  | -8 | 38.4111 | 4.84812 | 14 |
| -3 | 10  | -8 | 38.0405 | 4.68793 | 12 |
| -3 | 10  | -8 | 37.5436 | 2.70124 | 6  |
| -3 | 10  | -8 | 39.6907 | 3.03498 | 9  |
| 3  | 10  | 8  | 35.0994 | 5.84086 | 13 |
| -4 | -10 | -8 | 9.96313 | 2.99210 | 10 |
| -4 | -10 | -8 | 15.9732 | 4.93757 | 1  |
| -4 | -10 | -8 | 11.1869 | 3.04924 | 8  |
| -4 | 10  | -8 | 7.53678 | 3.14207 | 14 |
| -4 | 10  | -8 | 9.38734 | 1.00692 | 6  |
| -4 | 10  | -8 | 8.44577 | 1.25366 | 9  |
| 4  | 10  | 8  | 11.9601 | 3.66368 | 13 |
| -4 | 10  | -8 | 6.78093 | 2.66827 | 12 |
| -5 | -10 | -8 | 9.77095 | 2.45703 | 8  |
| -5 | 10  | -8 | 4.79944 | 2.67623 | 12 |
| -5 | 10  | -8 | 6.75187 | 0.68137 | 6  |
| -5 | 10  | -8 | 6.53511 | 0.74043 | 6  |
| 5  | 10  | 8  | 4.41337 | 3.55860 | 13 |
| -5 | 10  | -8 | 8.38429 | 1.06447 | 9  |
| -6 | -10 | -8 | 12.6155 | 2.31240 | 8  |
| -6 | -10 | -8 | 13.1818 | 2.40130 | 10 |
| -6 | 10  | -8 | 11.3240 | 1.12775 | 9  |
| 6  | 10  | 8  | 10.9799 | 3.33826 | 13 |
| -6 | 10  | -8 | 11.6765 | 2.64336 | 12 |
| -6 | 10  | -8 | 13.1522 | 1.19908 | 9  |
| -9 | -11 | 8  | 50.0236 | 4.44854 | 10 |
| 9  | -11 | -8 | 36.3604 | 4.21916 | 13 |
| 8  | -11 | -8 | 2.16510 | 2.84910 | 13 |
| -8 | -11 | 8  | 2.52483 | 1.98617 | 10 |
| -8 | 11  | 8  | 0.28653 | 1.34192 | 7  |
| -7 | -11 | 8  | 36.4279 | 5.17141 | 10 |
| 7  | -11 | -8 | 25.8494 | 4.13628 | 13 |
| -7 | 11  | 8  | 22.2033 | 2.32955 | 11 |
| -7 | 11  | 8  | 24.4059 | 2.56379 | 11 |
| 6  | -11 | -8 | 78.2186 | 7.77636 | 13 |
| -6 | 11  | 8  | 77.8912 | 5.58417 | 11 |
| 5  | -11 | -8 | 57.3160 | 7.15819 | 13 |

|    |     |    |         |         |    |
|----|-----|----|---------|---------|----|
| -5 | -11 | 8  | 80.2272 | 7.09641 | 13 |
| -5 | 11  | 8  | 70.1175 | 6.56679 | 10 |
| 5  | 11  | -8 | 80.4366 | 7.58779 | 10 |
| 4  | -11 | -8 | 17.6625 | 5.56761 | 2  |
| -4 | -11 | 8  | 16.1815 | 4.26461 | 13 |
| -4 | 11  | 8  | 10.2624 | 2.88391 | 10 |
| 4  | 11  | -8 | 12.0107 | 3.39626 | 10 |
| 3  | -11 | -8 | 9.94491 | 4.88673 | 2  |
| 3  | 11  | -8 | 2.62833 | 2.78176 | 10 |
| -3 | 11  | 8  | 8.22473 | 2.72694 | 10 |
| 2  | -11 | -8 | 28.6723 | 6.11780 | 2  |
| 1  | -11 | -8 | 53.7393 | 7.53448 | 2  |
| 0  | -11 | -8 | 23.8210 | 5.53540 | 2  |
| -1 | -11 | -8 | 301.881 | 23.0644 | 2  |
| -1 | -11 | -8 | 313.595 | 23.9481 | 1  |
| -1 | 11  | -8 | 326.494 | 19.5580 | 11 |
| -2 | -11 | -8 | 72.5693 | 9.79064 | 2  |
| -2 | -11 | -8 | 60.3979 | 6.78795 | 10 |
| -2 | -11 | -8 | 69.2628 | 8.88410 | 1  |
| 2  | 11  | 8  | 65.4541 | 7.77583 | 13 |
| -3 | -11 | -8 | 23.4382 | 5.43843 | 1  |
| -3 | -11 | -8 | 19.3663 | 3.66414 | 10 |
| -3 | 11  | -8 | 22.9350 | 3.43091 | 14 |
| -3 | 11  | -8 | 20.1898 | 3.43788 | 12 |
| -3 | 11  | -8 | 22.2484 | 2.18552 | 9  |
| 3  | 11  | 8  | 19.9676 | 4.02292 | 13 |
| -3 | 11  | -8 | 22.3523 | 1.69737 | 6  |
| -4 | -11 | -8 | 4.56650 | 3.49775 | 1  |
| -4 | -11 | -8 | 9.14768 | 3.13046 | 10 |
| 4  | 11  | 8  | 7.75407 | 3.36273 | 13 |
| -4 | 11  | -8 | 2.50406 | 2.61357 | 14 |
| -4 | 11  | -8 | 4.17888 | 2.72577 | 12 |
| -4 | 11  | -8 | 4.96927 | 0.76791 | 6  |
| -4 | 11  | -8 | 6.76038 | 1.08036 | 9  |
| -5 | -11 | -8 | 0.21347 | 2.19226 | 10 |
| -5 | -11 | -8 | 0.31273 | 1.92568 | 8  |
| -5 | 11  | -8 | 0.17498 | 0.33176 | 6  |
| -5 | 11  | -8 | 1.18890 | 1.67733 | 12 |
| -5 | 11  | -8 | -0.1101 | 0.71357 | 9  |
| 5  | 11  | 8  | 0.64829 | 3.68368 | 13 |
| -5 | 11  | -8 | 0.04948 | 0.38407 | 6  |
| -6 | -11 | -8 | 5.05161 | 1.89079 | 10 |
| -6 | -11 | -8 | 4.74406 | 1.86373 | 8  |
| -6 | 11  | -8 | 4.19989 | 2.08164 | 12 |
| 6  | 11  | 8  | 4.55940 | 2.58145 | 13 |
| 8  | -12 | -8 | 41.8418 | 5.08027 | 13 |
| -8 | -12 | 8  | 49.1863 | 5.45273 | 10 |
| 7  | -12 | -8 | 32.1053 | 5.09128 | 13 |
| 6  | -12 | -8 | 7.63442 | 3.33622 | 13 |
| -6 | -12 | 8  | 19.6649 | 6.25869 | 1  |

|    |     |    |         |         |    |
|----|-----|----|---------|---------|----|
| -6 | 12  | 8  | 6.06491 | 1.47979 | 11 |
| 5  | -12 | -8 | 38.8247 | 5.22055 | 13 |
| -5 | -12 | 8  | 30.1057 | 5.40598 | 13 |
| 5  | 12  | -8 | 40.1669 | 5.82510 | 10 |
| -5 | 12  | 8  | 42.4469 | 4.82817 | 10 |
| -4 | -12 | 8  | 19.1239 | 3.49239 | 13 |
| 4  | -12 | -8 | 21.4423 | 3.83182 | 13 |
| -4 | 12  | 8  | 20.5733 | 3.78419 | 10 |
| 4  | 12  | -8 | 24.1829 | 4.21033 | 10 |
| 3  | -12 | -8 | 22.0566 | 5.46872 | 2  |
| -3 | 12  | 8  | 17.8245 | 3.43545 | 10 |
| 2  | -12 | -8 | 38.2233 | 6.89073 | 2  |
| -2 | 12  | 8  | 28.1929 | 4.84690 | 10 |
| 2  | 12  | -8 | 25.8521 | 4.09202 | 10 |
| 1  | -12 | -8 | 119.390 | 11.7253 | 2  |
| 0  | -12 | -8 | 20.8085 | 4.96991 | 2  |
| 0  | 12  | -8 | 14.0628 | 2.48219 | 11 |
| -1 | -12 | -8 | 22.9022 | 5.05642 | 2  |
| -1 | -12 | -8 | 24.4283 | 5.76310 | 1  |
| -1 | 12  | -8 | 14.6510 | 3.08416 | 14 |
| -1 | 12  | -8 | 20.0842 | 2.16649 | 11 |
| 1  | 12  | 8  | 28.2789 | 4.91814 | 10 |
| -2 | -12 | -8 | 30.9715 | 6.22055 | 1  |
| -2 | 12  | -8 | 14.6156 | 3.29407 | 12 |
| -2 | 12  | -8 | 19.3759 | 1.51774 | 6  |
| -2 | 12  | -8 | 13.3076 | 1.84690 | 9  |
| -2 | 12  | -8 | 18.8651 | 3.67382 | 14 |
| -3 | -12 | -8 | 1.90599 | 4.51682 | 1  |
| -3 | -12 | -8 | 2.13590 | 2.74474 | 10 |
| -3 | 12  | -8 | 1.39727 | 0.96191 | 9  |
| 3  | 12  | 8  | 0.51438 | 2.83911 | 13 |
| -3 | 12  | -8 | 0.21146 | 2.24781 | 14 |
| -3 | 12  | -8 | 0.92191 | 2.46177 | 12 |
| -3 | 12  | -8 | 1.49874 | 0.61406 | 6  |
| -4 | -12 | -8 | 66.0319 | 8.23560 | 1  |
| -4 | -12 | -8 | 65.8454 | 6.47409 | 10 |
| -4 | 12  | -8 | 57.9565 | 3.79639 | 6  |
| -4 | 12  | -8 | 51.8226 | 7.04172 | 14 |
| 4  | 12  | 8  | 55.4685 | 6.95708 | 13 |
| -4 | 12  | -8 | 55.6625 | 4.00797 | 9  |
| -4 | 12  | -8 | 61.5865 | 6.19250 | 12 |
| -5 | -12 | -8 | 7.69837 | 2.81605 | 10 |
| -5 | 12  | -8 | 13.1611 | 1.35525 | 9  |
| -5 | 12  | -8 | 13.8251 | 1.46425 | 9  |
| -5 | 12  | -8 | 11.1762 | 2.38143 | 12 |
| 5  | 12  | 8  | 4.62566 | 3.32305 | 13 |
| -6 | -12 | -8 | 0.13649 | 1.62833 | 10 |
| 6  | 12  | 8  | 0.77774 | 2.07130 | 13 |
| -6 | 12  | -8 | 0.92950 | 1.96930 | 12 |
| 8  | -13 | -8 | 0.98006 | 2.35602 | 13 |

|    |     |    |         |         |    |
|----|-----|----|---------|---------|----|
| -8 | -13 | 8  | 3.17573 | 2.50476 | 10 |
| 7  | -13 | -8 | 21.6329 | 3.96311 | 13 |
| -7 | -13 | 8  | 22.8565 | 4.57880 | 10 |
| 7  | 13  | -8 | 23.0805 | 4.57046 | 10 |
| 6  | 13  | -8 | 37.1491 | 6.32771 | 10 |
| -6 | 13  | 8  | 32.0881 | 2.81175 | 11 |
| 5  | -13 | -8 | 44.9597 | 5.63063 | 13 |
| -5 | -13 | 8  | 61.8390 | 5.76637 | 13 |
| 5  | 13  | -8 | 61.1986 | 6.70987 | 10 |
| -5 | 13  | 8  | 41.7908 | 4.68006 | 10 |
| -4 | -13 | 8  | 11.6275 | 3.43326 | 13 |
| 4  | -13 | -8 | 11.0690 | 3.23915 | 13 |
| -4 | 13  | 8  | 10.6677 | 2.68460 | 10 |
| 4  | 13  | -8 | 6.77447 | 3.08127 | 10 |
| -3 | -13 | 8  | 12.8325 | 3.34042 | 13 |
| 3  | -13 | -8 | 13.5178 | 5.04449 | 2  |
| 3  | 13  | -8 | 24.1196 | 4.41702 | 10 |
| -3 | 13  | 8  | 21.5259 | 3.76357 | 10 |
| 2  | -13 | -8 | 2.59947 | 3.93847 | 2  |
| 2  | 13  | -8 | 1.83858 | 2.22382 | 10 |
| -2 | 13  | 8  | 3.14221 | 2.72718 | 10 |
| 1  | -13 | -8 | 80.3121 | 9.47291 | 2  |
| -1 | 13  | 8  | 80.9369 | 7.67996 | 10 |
| 1  | 13  | -8 | 65.4112 | 6.17105 | 10 |
| 0  | 13  | -8 | 147.684 | 12.0375 | 14 |
| 0  | 13  | -8 | 155.476 | 10.2941 | 11 |
| 0  | 13  | 8  | 166.324 | 12.6511 | 10 |
| -1 | -13 | -8 | 4.34186 | 4.51721 | 1  |
| 1  | 13  | 8  | -0.3981 | 3.38289 | 10 |
| -1 | 13  | -8 | 0.57254 | 2.49043 | 14 |
| -1 | 13  | -8 | 3.05669 | 1.02658 | 11 |
| -1 | 13  | -8 | 2.98021 | 0.91146 | 11 |
| -2 | -13 | -8 | 0.05359 | 3.59556 | 1  |
| -2 | -13 | -8 | 1.68726 | 2.82034 | 10 |
| -2 | 13  | -8 | 3.40989 | 2.91181 | 12 |
| -2 | 13  | -8 | 2.74066 | 0.60667 | 6  |
| -2 | 13  | -8 | 1.21006 | 2.47747 | 14 |
| -2 | 13  | -8 | 2.37284 | 1.07353 | 9  |
| -3 | -13 | -8 | 11.0118 | 4.72739 | 1  |
| -3 | -13 | -8 | 10.9140 | 3.45818 | 10 |
| -3 | 13  | -8 | 8.68255 | 2.81697 | 12 |
| -3 | 13  | -8 | 8.64263 | 0.95182 | 6  |
| -3 | 13  | -8 | 10.0908 | 3.35610 | 14 |
| -3 | 13  | -8 | 8.07711 | 1.31344 | 9  |
| -4 | -13 | -8 | 17.3886 | 3.71534 | 10 |
| -4 | 13  | -8 | 16.2747 | 1.35704 | 6  |
| -4 | 13  | -8 | 21.0704 | 1.80346 | 9  |
| -4 | 13  | -8 | 21.0887 | 3.41550 | 14 |
| -4 | 13  | -8 | 18.3938 | 3.31567 | 12 |
| -4 | 13  | -8 | 15.0789 | 1.28210 | 6  |



|    |     |    |         |         |    |
|----|-----|----|---------|---------|----|
| -5 | -13 | -8 | 2.34691 | 1.76764 | 10 |
| -5 | 13  | -8 | -0.8151 | 1.75667 | 12 |
| -6 | -13 | -8 | 1.93572 | 1.65498 | 10 |
| -6 | 13  | -8 | 2.57400 | 1.39292 | 12 |
| 8  | -14 | -8 | 1.55112 | 1.72311 | 13 |
| -8 | -14 | 8  | 1.11195 | 2.20099 | 10 |
| 7  | -14 | -8 | 12.0729 | 3.03185 | 13 |
| 7  | 14  | -8 | 0.36191 | 3.50168 | 10 |
| 6  | -14 | -8 | 107.580 | 9.54339 | 13 |
| 6  | 14  | -8 | 97.7846 | 9.67001 | 10 |
| -6 | 14  | 8  | 115.588 | 7.24193 | 11 |
| -6 | 14  | 8  | 115.288 | 7.16481 | 11 |
| -5 | -14 | 8  | 41.9716 | 5.62226 | 13 |
| 5  | -14 | -8 | 30.3930 | 5.81074 | 13 |
| 5  | 14  | -8 | 41.2942 | 5.79098 | 10 |
| -5 | 14  | 8  | 27.9154 | 3.43030 | 11 |
| -4 | -14 | 8  | 8.86827 | 3.39721 | 13 |
| 4  | -14 | -8 | 11.8071 | 2.86118 | 13 |
| -4 | 14  | 8  | 12.1363 | 2.72344 | 10 |
| 4  | 14  | -8 | 9.51138 | 3.22581 | 10 |
| 3  | -14 | -8 | 5.31368 | 2.97749 | 13 |
| -3 | -14 | 8  | 7.28475 | 3.24960 | 13 |
| -3 | 14  | 8  | 6.06835 | 2.63223 | 10 |
| 3  | 14  | -8 | 7.43499 | 3.28561 | 10 |
| -2 | -14 | 8  | 23.0931 | 4.16996 | 13 |
| 2  | -14 | -8 | 18.5033 | 3.63120 | 13 |
| 2  | 14  | -8 | 23.0277 | 3.84990 | 10 |
| -2 | 14  | 8  | 19.3468 | 3.87154 | 10 |
| -1 | -14 | 8  | 16.5353 | 3.49290 | 13 |
| 1  | 14  | -8 | 18.7893 | 3.80765 | 14 |
| 1  | 14  | -8 | 19.9804 | 3.39438 | 10 |
| 0  | -14 | -8 | 12.2997 | 3.20410 | 13 |
| 0  | 14  | -8 | 12.1147 | 1.89504 | 11 |
| 0  | 14  | 8  | 19.0482 | 4.41883 | 10 |
| 0  | 14  | -8 | 12.3013 | 2.89063 | 14 |
| -1 | -14 | -8 | 150.446 | 16.0941 | 1  |
| 1  | 14  | 8  | 149.739 | 12.5248 | 10 |
| -1 | 14  | -8 | 160.306 | 11.5061 | 14 |
| -2 | -14 | -8 | 36.2740 | 7.49135 | 1  |
| -2 | 14  | -8 | 38.8755 | 2.70467 | 6  |
| -2 | 14  | -8 | 39.4837 | 3.29887 | 9  |
| -2 | 14  | -8 | 36.8268 | 5.08681 | 14 |
| -2 | 14  | -8 | 38.5845 | 5.11155 | 12 |
| -3 | -14 | -8 | 26.7799 | 6.43962 | 1  |
| -3 | -14 | -8 | 28.6875 | 5.31465 | 10 |
| -3 | 14  | -8 | 34.1752 | 4.63221 | 12 |
| -3 | 14  | -8 | 31.4319 | 2.22345 | 6  |
| -3 | 14  | -8 | 32.5556 | 2.76359 | 9  |
| -4 | -14 | -8 | -0.4108 | 1.95355 | 10 |
| -4 | 14  | -8 | 0.72208 | 0.37078 | 6  |

|    |     |    |         |         |    |
|----|-----|----|---------|---------|----|
| -4 | 14  | -8 | 1.45387 | 0.77063 | 9  |
| -4 | 14  | -8 | 1.84090 | 0.42454 | 6  |
| -4 | 14  | -8 | -0.1257 | 2.56926 | 12 |
| -4 | 14  | -8 | -1.4677 | 2.58079 | 14 |
| -5 | -14 | -8 | 18.8822 | 3.73271 | 10 |
| -5 | 14  | -8 | 14.4355 | 2.96007 | 12 |
| -6 | -14 | -8 | 18.7046 | 2.62186 | 10 |
| -6 | 14  | -8 | 20.0377 | 3.08967 | 12 |
| 8  | -15 | -8 | 1.62570 | 1.61705 | 13 |
| -8 | -15 | 8  | 2.53367 | 2.19500 | 10 |
| 7  | -15 | -8 | 21.9763 | 3.52723 | 13 |
| 7  | 15  | -8 | 20.4655 | 4.24364 | 10 |
| 6  | -15 | -8 | 47.4747 | 5.91541 | 13 |
| 6  | 15  | -8 | 49.9217 | 5.80716 | 10 |
| -5 | -15 | 8  | 137.985 | 11.7954 | 13 |
| 5  | -15 | -8 | 183.734 | 12.7115 | 13 |
| -5 | 15  | 8  | 193.367 | 10.7867 | 11 |
| 5  | 15  | -8 | 143.981 | 12.7461 | 10 |
| 4  | -15 | -8 | 18.8300 | 3.71054 | 13 |
| -4 | -15 | 8  | 32.4727 | 5.19744 | 13 |
| -4 | 15  | 8  | 20.9452 | 3.54328 | 10 |
| 3  | -15 | -8 | -0.2087 | 2.79005 | 13 |
| -3 | -15 | 8  | 1.07188 | 2.43612 | 13 |
| 3  | 15  | -8 | 7.00919 | 2.81994 | 10 |
| -3 | 15  | 8  | -0.6160 | 2.20575 | 10 |
| -2 | -15 | 8  | 23.2937 | 3.60521 | 13 |
| -2 | 15  | 8  | 16.3750 | 4.03557 | 10 |
| 2  | 15  | -8 | 19.7077 | 3.66787 | 10 |
| -1 | -15 | 8  | 3.04845 | 2.80762 | 13 |
| 1  | -15 | -8 | 3.07004 | 2.75800 | 13 |
| -1 | 15  | 8  | 5.57658 | 3.16096 | 10 |
| 1  | 15  | -8 | 6.79740 | 2.99937 | 14 |
| 1  | 15  | -8 | 3.38333 | 2.45245 | 10 |
| 0  | -15 | -8 | 6.78049 | 2.37917 | 13 |
| 0  | 15  | 8  | 6.13032 | 3.58993 | 10 |
| -1 | 15  | -8 | 18.7478 | 3.34482 | 14 |
| -2 | -15 | -8 | 49.2531 | 8.48180 | 1  |
| -2 | 15  | -8 | 58.7465 | 5.53516 | 12 |
| -2 | 15  | -8 | 54.7587 | 3.95430 | 9  |
| 2  | 15  | 8  | 41.2635 | 7.13154 | 10 |
| -2 | 15  | -8 | 60.3082 | 6.09365 | 14 |
| -2 | 15  | -8 | 54.7144 | 3.59723 | 6  |
| -3 | -15 | -8 | 14.1899 | 3.81803 | 10 |
| -3 | 15  | -8 | 16.8780 | 2.04759 | 9  |
| -3 | 15  | -8 | 19.6746 | 3.57960 | 14 |
| -3 | 15  | -8 | 19.8188 | 1.46272 | 6  |
| -3 | 15  | -8 | 18.2416 | 3.41550 | 12 |
| -4 | -15 | -8 | 23.8204 | 3.85960 | 10 |
| -4 | 15  | -8 | 30.5237 | 2.07450 | 9  |
| -4 | 15  | -8 | 29.2010 | 2.17166 | 9  |

|    |     |    |         |         |    |
|----|-----|----|---------|---------|----|
| -4 | 15  | -8 | 30.3722 | 4.82860 | 14 |
| -5 | -15 | -8 | 6.18569 | 2.48038 | 10 |
| -5 | 15  | -8 | 5.39354 | 2.26221 | 12 |
| 7  | -16 | -8 | 6.32536 | 2.40743 | 13 |
| 7  | 16  | -8 | 7.69665 | 3.21361 | 10 |
| 6  | 16  | -8 | 17.1440 | 4.19232 | 10 |
| -5 | -16 | 8  | 8.33228 | 2.65588 | 13 |
| 5  | -16 | -8 | 3.32462 | 3.41075 | 13 |
| -5 | 16  | 8  | 6.74433 | 1.34704 | 11 |
| 5  | 16  | -8 | 7.10719 | 3.65737 | 10 |
| -4 | -16 | 8  | 24.1670 | 4.20305 | 13 |
| 4  | -16 | -8 | 28.5323 | 4.65830 | 13 |
| 4  | 16  | -8 | 20.9056 | 4.09317 | 10 |
| -4 | 16  | 8  | 27.2483 | 4.06881 | 10 |
| 3  | -16 | -8 | 33.0401 | 5.27221 | 13 |
| -3 | -16 | 8  | 41.4590 | 5.78670 | 13 |
| 3  | 16  | -8 | 40.4946 | 5.13226 | 10 |
| -3 | 16  | 8  | 35.7808 | 4.70931 | 10 |
| 2  | -16 | -8 | 39.4466 | 5.01038 | 13 |
| -2 | -16 | 8  | 37.9721 | 5.25654 | 13 |
| -2 | 16  | 8  | 48.7228 | 6.20656 | 10 |
| 2  | 16  | -8 | 45.2788 | 5.27639 | 10 |
| -1 | -16 | 8  | 33.6423 | 5.36876 | 13 |
| 1  | -16 | -8 | 38.3548 | 5.18307 | 13 |
| 1  | 16  | -8 | 33.3407 | 3.63897 | 11 |
| 1  | 16  | -8 | 36.1307 | 4.51937 | 14 |
| -1 | 16  | 8  | 26.5821 | 5.38433 | 10 |
| 0  | 16  | -8 | 29.9195 | 4.60891 | 14 |
| 0  | 16  | -8 | 22.0449 | 2.50263 | 11 |
| 0  | 16  | -8 | 21.9089 | 2.59497 | 11 |
| -1 | 16  | -8 | 24.2236 | 3.65578 | 14 |
| 1  | 16  | 8  | 19.4334 | 4.50450 | 10 |
| -2 | -16 | -8 | 36.6592 | 7.69403 | 1  |
| -2 | 16  | -8 | 36.1005 | 3.17591 | 9  |
| -2 | 16  | -8 | 35.2216 | 2.44288 | 6  |
| -2 | 16  | -8 | 31.1994 | 4.65151 | 12 |
| -2 | 16  | -8 | 46.3648 | 5.73677 | 14 |
| 2  | 16  | 8  | 28.9800 | 5.53590 | 10 |
| -3 | -16 | -8 | 58.0784 | 6.88658 | 10 |
| -3 | 16  | -8 | 66.9739 | 4.09824 | 6  |
| -4 | -16 | -8 | 36.2286 | 4.35099 | 10 |
| -4 | 16  | -8 | 34.8878 | 4.69613 | 12 |
| -4 | 16  | -8 | 44.1158 | 5.06138 | 14 |
| -5 | -16 | -8 | 1.00437 | 1.59705 | 10 |
| -5 | 16  | -8 | 2.60813 | 2.02202 | 12 |
| 7  | -17 | -8 | 3.30628 | 2.07487 | 13 |
| 7  | 17  | -8 | 0.22454 | 2.03917 | 10 |
| 6  | -17 | -8 | 1.15096 | 2.37764 | 13 |
| 6  | 17  | -8 | 2.48670 | 2.46664 | 10 |
| -5 | -17 | 8  | 7.07753 | 2.73472 | 13 |

|    |     |    |         |         |    |
|----|-----|----|---------|---------|----|
| 5  | -17 | -8 | 6.51473 | 2.89083 | 13 |
| 5  | 17  | -8 | 7.52055 | 3.66796 | 10 |
| -4 | -17 | 8  | 4.57622 | 2.89412 | 13 |
| 4  | -17 | -8 | 11.7836 | 3.01464 | 13 |
| -4 | 17  | 8  | 9.75390 | 1.71424 | 11 |
| 3  | -17 | -8 | 72.4180 | 6.47040 | 13 |
| -3 | -17 | 8  | 61.4377 | 6.60778 | 13 |
| -3 | 17  | 8  | 70.6576 | 6.26585 | 10 |
| 3  | 17  | -8 | 63.9009 | 7.05065 | 10 |
| -2 | -17 | 8  | 16.1606 | 3.72737 | 13 |
| 2  | -17 | -8 | 25.8321 | 4.82286 | 13 |
| -2 | 17  | 8  | 24.7779 | 4.54519 | 10 |
| 2  | 17  | -8 | 18.4738 | 3.68428 | 10 |
| -1 | -17 | 8  | 0.00027 | 2.14888 | 13 |
| 1  | -17 | -8 | 2.94794 | 2.31596 | 13 |
| -1 | 17  | 8  | 3.69138 | 2.94295 | 10 |
| 1  | 17  | -8 | -1.0003 | 2.99122 | 14 |
| 1  | 17  | -8 | -0.5806 | 1.70284 | 11 |
| 0  | -17 | -8 | 47.3380 | 5.59950 | 13 |
| 0  | 17  | 8  | 51.3322 | 6.48744 | 10 |
| 0  | 17  | -8 | 41.0524 | 3.15945 | 11 |
| 0  | 17  | -8 | 40.5288 | 3.05164 | 11 |
| 0  | 17  | -8 | 35.3353 | 5.96634 | 14 |
| -1 | 17  | -8 | 37.1952 | 4.90879 | 14 |
| -2 | 17  | -8 | 18.1129 | 2.24981 | 9  |
| -2 | 17  | -8 | 26.5935 | 3.95056 | 14 |
| 2  | 17  | 8  | 18.7346 | 3.96231 | 10 |
| -2 | 17  | -8 | 21.1655 | 1.60524 | 6  |
| -3 | -17 | -8 | 1.61460 | 2.07783 | 10 |
| -3 | 17  | -8 | 1.70756 | 2.30137 | 12 |
| -3 | 17  | -8 | 1.92765 | 0.48331 | 6  |
| -3 | 17  | -8 | 1.38909 | 0.43122 | 6  |
| -3 | 17  | -8 | 3.50470 | 2.79187 | 14 |
| -3 | 17  | -8 | 2.04332 | 0.91476 | 9  |
| 3  | 17  | 8  | 3.68679 | 2.62465 | 10 |
| -4 | -17 | -8 | 8.47294 | 3.01777 | 10 |
| -4 | 17  | -8 | 6.70728 | 2.50360 | 12 |
| -5 | -17 | -8 | 12.3248 | 2.27480 | 10 |
| -5 | 17  | -8 | 11.4266 | 2.23340 | 12 |
| 7  | -18 | -8 | 3.62978 | 1.84620 | 13 |
| 7  | 18  | -8 | 6.87882 | 2.21215 | 10 |
| 6  | -18 | -8 | 10.3406 | 2.90432 | 13 |
| 6  | 18  | -8 | 6.48009 | 2.60774 | 10 |
| -5 | -18 | 8  | 40.9289 | 4.91226 | 13 |
| 5  | -18 | -8 | 39.8182 | 5.30940 | 13 |
| 5  | 18  | -8 | 39.4884 | 5.59996 | 10 |
| -4 | -18 | 8  | 8.47494 | 2.95262 | 13 |
| 4  | -18 | -8 | 5.36359 | 2.74168 | 13 |
| 4  | 18  | -8 | 6.86652 | 3.22488 | 10 |
| -4 | 18  | 8  | 2.81098 | 1.23730 | 11 |

|    |     |    |         |         |    |
|----|-----|----|---------|---------|----|
| -3 | -18 | 8  | 6.43094 | 2.85506 | 13 |
| 3  | -18 | -8 | 7.00313 | 3.28107 | 13 |
| -3 | 18  | 8  | 9.20449 | 2.85018 | 10 |
| 3  | 18  | -8 | 9.81919 | 3.49398 | 10 |
| 2  | -18 | -8 | 21.3137 | 3.85459 | 13 |
| -2 | -18 | 8  | 30.3969 | 5.00403 | 13 |
| -2 | 18  | 8  | 21.6749 | 4.38761 | 10 |
| 2  | 18  | -8 | 26.7729 | 4.27832 | 10 |
| 1  | -18 | -8 | 6.30228 | 2.99468 | 13 |
| -1 | -18 | 8  | 3.69704 | 2.43982 | 13 |
| 1  | 18  | -8 | 5.18773 | 3.41709 | 14 |
| 1  | 18  | -8 | 5.41288 | 1.70725 | 11 |
| -1 | 18  | 8  | 4.20348 | 3.01497 | 10 |
| 0  | -18 | -8 | -2.0790 | 3.02488 | 13 |
| 0  | 18  | 8  | -4.3283 | 3.27027 | 10 |
| -1 | -18 | -8 | 58.5429 | 5.98022 | 13 |
| -1 | 18  | -8 | 66.8589 | 6.77537 | 14 |
| 1  | 18  | 8  | 62.2880 | 7.49465 | 10 |
| -2 | 18  | -8 | 22.1015 | 2.36158 | 9  |
| -2 | 18  | -8 | 19.3716 | 1.58794 | 6  |
| 2  | 18  | 8  | 26.0205 | 4.86311 | 10 |
| -3 | 18  | -8 | 11.4310 | 1.33060 | 9  |
| -3 | 18  | -8 | 9.85088 | 2.67425 | 12 |
| 3  | 18  | 8  | 5.64083 | 3.70723 | 10 |
| -3 | 18  | -8 | 11.2437 | 3.07236 | 14 |
| -3 | 18  | -8 | 9.51076 | 0.86094 | 6  |
| -4 | -18 | -8 | 1.27253 | 2.32402 | 10 |
| -4 | 18  | -8 | 1.77920 | 2.07741 | 12 |
| 6  | -19 | -8 | 10.7079 | 2.29792 | 13 |
| 6  | 19  | -8 | 12.3180 | 2.70109 | 10 |
| -5 | -19 | 8  | 19.8589 | 3.74877 | 13 |
| 5  | -19 | -8 | 22.2372 | 4.20810 | 13 |
| 5  | 19  | -8 | 18.3468 | 3.48123 | 10 |
| -4 | -19 | 8  | 27.6310 | 4.60281 | 13 |
| 4  | -19 | -8 | 17.6765 | 3.47266 | 13 |
| -4 | 19  | 8  | 19.0556 | 2.27019 | 11 |
| 4  | 19  | -8 | 27.7419 | 4.47903 | 10 |
| -3 | -19 | 8  | 2.21515 | 2.68496 | 13 |
| 3  | -19 | -8 | 0.71164 | 2.99584 | 13 |
| 3  | 19  | -8 | 3.41163 | 2.49428 | 10 |
| -3 | 19  | 8  | 0.11250 | 2.04063 | 10 |
| -3 | 19  | 8  | -0.8718 | 1.53227 | 11 |
| 2  | -19 | -8 | 5.20495 | 2.58846 | 13 |
| -2 | 19  | 8  | 6.66907 | 2.79554 | 10 |
| 1  | -19 | -8 | 34.2221 | 4.81614 | 13 |
| -1 | -19 | 8  | 31.4314 | 5.02168 | 13 |
| 1  | 19  | -8 | 32.3764 | 3.39260 | 11 |
| -1 | 19  | 8  | 33.9318 | 5.35543 | 10 |
| 1  | 19  | -8 | 37.6594 | 5.01025 | 14 |
| 1  | 19  | -8 | 33.9834 | 3.59253 | 11 |

|    |     |    |         |         |    |
|----|-----|----|---------|---------|----|
| 0  | -19 | -8 | 3.14339 | 2.88279 | 13 |
| 0  | 19  | -8 | 13.6766 | 3.25306 | 14 |
| 0  | 19  | 8  | 4.81718 | 3.27347 | 10 |
| -1 | -19 | -8 | 33.0507 | 5.38910 | 13 |
| 1  | 19  | 8  | 27.8613 | 4.85347 | 10 |
| -1 | 19  | -8 | 42.1420 | 3.46652 | 9  |
| -1 | 19  | -8 | 49.0323 | 5.60953 | 14 |
| -2 | 19  | -8 | 15.4379 | 1.39723 | 6  |
| -2 | 19  | -8 | 17.4706 | 3.53128 | 14 |
| 2  | 19  | 8  | 18.1820 | 4.55231 | 10 |
| -2 | 19  | -8 | 20.2309 | 1.89269 | 9  |
| -3 | 19  | -8 | 1.51630 | 0.61827 | 9  |
| -3 | 19  | -8 | 2.03948 | 0.62313 | 9  |
| 3  | 19  | 8  | 2.98874 | 3.41720 | 10 |
| -3 | 19  | -8 | 0.82698 | 1.98856 | 12 |
| -4 | -19 | -8 | 4.02918 | 2.17997 | 10 |
| -4 | 19  | -8 | 2.60305 | 1.81326 | 12 |
| 6  | -20 | -8 | 16.2959 | 2.74077 | 13 |
| 6  | 20  | -8 | 12.6561 | 2.87720 | 10 |
| 5  | -20 | -8 | 6.97173 | 2.77214 | 13 |
| -5 | -20 | 8  | 6.72367 | 2.58599 | 13 |
| 5  | 20  | -8 | 4.89419 | 2.01419 | 10 |
| 4  | -20 | -8 | 18.3992 | 3.42833 | 13 |
| -4 | -20 | 8  | 22.7345 | 3.42312 | 13 |
| -4 | 20  | 8  | 20.0805 | 1.77962 | 11 |
| -4 | 20  | 8  | 18.7424 | 1.75844 | 11 |
| 4  | 20  | -8 | 23.8567 | 3.95617 | 10 |
| -3 | -20 | 8  | 17.5367 | 3.22864 | 13 |
| 3  | -20 | -8 | 17.7933 | 3.18170 | 13 |
| 3  | 20  | -8 | 17.5115 | 3.35192 | 10 |
| -3 | 20  | 8  | 17.5202 | 2.47508 | 11 |
| 2  | -20 | -8 | 56.9154 | 5.62163 | 13 |
| -2 | -20 | 8  | 53.0686 | 5.80559 | 13 |
| -2 | 20  | 8  | 54.1956 | 5.30232 | 10 |
| 2  | 20  | -8 | 45.8814 | 4.83187 | 11 |
| 1  | -20 | -8 | 30.2308 | 4.96349 | 13 |
| -1 | 20  | 8  | 42.9762 | 5.19746 | 10 |
| 0  | -20 | -8 | 4.58846 | 2.37663 | 13 |
| 0  | 20  | 8  | 3.88445 | 2.25108 | 10 |
| 1  | 20  | 8  | 14.6015 | 3.31036 | 10 |
| -1 | 20  | -8 | 17.7791 | 1.86703 | 9  |
| -1 | 20  | -8 | 13.5345 | 3.30095 | 14 |
| -2 | 20  | -8 | 183.536 | 11.4185 | 9  |
| -2 | 20  | -8 | 182.046 | 11.1867 | 6  |
| 2  | 20  | 8  | 181.627 | 13.5923 | 10 |
| 3  | 20  | 8  | 19.1517 | 3.87340 | 10 |
| -5 | -21 | 8  | 1.27255 | 1.57242 | 13 |
| 5  | -21 | -8 | 0.71694 | 1.73346 | 13 |
| 5  | 21  | -8 | 1.40701 | 2.09261 | 10 |
| 4  | -21 | -8 | -0.5373 | 2.09981 | 13 |

|    |     |    |         |         |    |
|----|-----|----|---------|---------|----|
| -4 | -21 | 8  | -0.2404 | 2.27809 | 13 |
| 4  | 21  | -8 | 1.25265 | 2.02932 | 10 |
| 3  | -21 | -8 | 3.16804 | 2.75522 | 13 |
| -3 | -21 | 8  | 3.55852 | 2.42024 | 13 |
| 3  | 21  | -8 | 0.04069 | 1.89083 | 11 |
| -3 | 21  | 8  | 0.98011 | 1.20001 | 11 |
| -2 | -21 | 8  | 15.9207 | 3.48444 | 13 |
| 2  | -21 | -8 | 13.4393 | 3.02760 | 13 |
| 2  | 21  | -8 | 20.9543 | 2.79454 | 11 |
| -2 | 21  | 8  | 9.60103 | 2.45555 | 10 |
| -1 | -21 | 8  | 9.36475 | 3.07881 | 13 |
| -1 | 21  | 8  | 18.0418 | 3.41998 | 10 |
| 0  | -21 | -8 | 59.6450 | 5.75827 | 13 |
| 0  | 21  | 8  | 53.8857 | 6.10661 | 10 |
| 1  | 21  | 8  | 19.3405 | 3.83075 | 10 |
| -1 | 21  | -8 | 14.9261 | 2.01531 | 9  |
| -1 | 21  | -8 | 16.0238 | 1.42925 | 6  |
| -2 | 21  | -8 | 4.74475 | 0.91898 | 9  |
| -2 | 21  | -8 | 5.93226 | 0.61356 | 6  |
| 2  | 21  | 8  | 8.11388 | 3.24345 | 10 |
| 3  | 21  | 8  | 4.69625 | 2.11229 | 10 |
| 5  | -22 | -8 | 3.86801 | 2.00652 | 13 |
| 5  | 22  | -8 | 9.51478 | 3.59646 | 10 |
| -4 | -22 | 8  | 11.9847 | 2.38924 | 13 |
| 4  | -22 | -8 | 9.81839 | 2.71915 | 13 |
| 4  | 22  | -8 | 11.2457 | 2.09640 | 11 |
| 4  | 22  | -8 | 9.90166 | 1.95195 | 10 |
| -3 | -22 | 8  | 5.96218 | 2.32007 | 13 |
| 3  | -22 | -8 | 2.90033 | 2.22030 | 13 |
| 3  | 22  | -8 | 3.19665 | 1.78434 | 11 |
| -3 | 22  | 8  | 3.41755 | 0.81806 | 11 |
| -3 | 22  | 8  | 4.37695 | 0.86596 | 11 |
| 2  | -22 | -8 | 10.4046 | 2.60612 | 13 |
| -2 | -22 | 8  | 10.8647 | 2.93336 | 13 |
| -2 | 22  | 8  | 9.91324 | 1.67579 | 11 |
| 2  | 22  | -8 | 10.6797 | 1.15850 | 11 |
| 2  | 22  | -8 | 9.08963 | 1.11039 | 11 |
| -1 | -22 | 8  | 5.10440 | 2.16026 | 13 |
| 1  | -22 | -8 | 14.1954 | 2.70246 | 13 |
| -1 | 22  | 8  | 9.74563 | 2.56049 | 10 |
| 0  | -22 | -8 | 9.55661 | 2.42823 | 13 |
| 0  | 22  | 8  | 4.94224 | 2.63739 | 10 |
| -1 | 22  | -8 | 0.25599 | 0.88485 | 9  |
| 1  | 22  | 8  | 0.91603 | 2.50234 | 10 |
| 2  | 22  | 8  | 0.31334 | 2.46612 | 10 |
| -2 | 22  | -8 | -0.1379 | 0.55804 | 9  |
| 4  | -23 | -8 | 12.9244 | 2.25634 | 13 |
| -4 | -23 | 8  | 13.3428 | 2.11971 | 13 |
| 4  | 23  | -8 | 12.0724 | 1.67134 | 11 |
| -3 | -23 | 8  | 34.3810 | 4.22263 | 13 |

|    |     |    |         |         |    |
|----|-----|----|---------|---------|----|
| 3  | -23 | -8 | 41.9837 | 4.27336 | 13 |
| 2  | -23 | -8 | 3.15533 | 2.04254 | 13 |
| -2 | -23 | 8  | 1.28493 | 1.92647 | 13 |
| -2 | 23  | 8  | 1.11695 | 1.04635 | 11 |
| 1  | -23 | -8 | 27.1909 | 3.88506 | 13 |
| -1 | -23 | 8  | 32.9617 | 3.75778 | 13 |
| -1 | 23  | 8  | 27.0359 | 3.39452 | 10 |
| 0  | -23 | -8 | 4.38879 | 2.33002 | 13 |
| 0  | 23  | 8  | 3.93274 | 2.10824 | 10 |
| 1  | 23  | 8  | 21.3124 | 3.48739 | 10 |
| -3 | -24 | 8  | 9.33821 | 2.21275 | 13 |
| 3  | -24 | -8 | 9.13642 | 2.37914 | 13 |
| -2 | -24 | 8  | 18.3377 | 3.51894 | 13 |
| 2  | -24 | -8 | 24.1081 | 3.35854 | 13 |
| -1 | -24 | 8  | 8.45458 | 1.89847 | 13 |
| 1  | -24 | -8 | 8.09900 | 2.37874 | 13 |
| -1 | 24  | 8  | 7.29865 | 1.40040 | 11 |
| 0  | -24 | -8 | 1.34516 | 1.56385 | 13 |
| 9  | 0   | -9 | 36.2821 | 5.78374 | 13 |
| 9  | 0   | -9 | 39.6272 | 5.52289 | 13 |
| -9 | 0   | 9  | 34.8986 | 4.03252 | 10 |
| 8  | 0   | -9 | 24.1595 | 4.50380 | 13 |
| -8 | 0   | 9  | 20.0107 | 4.01256 | 10 |
| -7 | 0   | 9  | 6.53032 | 2.79795 | 10 |
| 7  | 0   | -9 | 6.56104 | 3.21382 | 13 |
| 6  | 0   | -9 | -5.5969 | 3.25118 | 13 |
| -6 | 0   | 9  | 1.37475 | 2.53104 | 10 |
| -5 | 0   | 9  | 13.6492 | 3.41498 | 10 |
| 2  | 0   | -9 | 68.9198 | 7.35344 | 5  |
| 1  | 0   | -9 | 30.2043 | 4.67136 | 5  |
| 0  | 0   | -9 | 0.73113 | 1.57212 | 5  |
| -1 | 0   | -9 | 44.1752 | 4.16491 | 8  |
| -1 | 0   | -9 | 42.6031 | 5.61544 | 1  |
| -2 | 0   | -9 | 3.29201 | 1.81944 | 8  |
| -2 | 0   | -9 | 2.80638 | 2.10389 | 1  |
| 4  | 0   | 9  | 222.127 | 16.4114 | 13 |
| -4 | 0   | -9 | 235.261 | 15.7275 | 12 |
| -4 | 0   | -9 | 234.751 | 15.0232 | 8  |
| 6  | 0   | 9  | 4.55209 | 3.18340 | 13 |
| -6 | 0   | -9 | 6.16995 | 1.35925 | 8  |
| 7  | 0   | 9  | 7.24412 | 2.10566 | 13 |
| 9  | -1  | -9 | 7.12649 | 3.38976 | 13 |
| -9 | -1  | 9  | 12.6285 | 2.76106 | 10 |
| -9 | 1   | 9  | 8.61440 | 2.14789 | 10 |
| 9  | 1   | -9 | 11.5737 | 3.53159 | 13 |
| -9 | 1   | 9  | 10.4796 | 1.55894 | 11 |
| 9  | 1   | -9 | 9.27501 | 3.27821 | 13 |
| 8  | -1  | -9 | 34.6815 | 6.35762 | 13 |
| -8 | 1   | 9  | 40.1415 | 4.69306 | 10 |
| -7 | -1  | 9  | 60.0751 | 6.54252 | 10 |



|    |    |    |         |         |    |
|----|----|----|---------|---------|----|
| 7  | -1 | -9 | 72.3409 | 8.22341 | 13 |
| -7 | 1  | 9  | 71.7791 | 6.64875 | 10 |
| 7  | 1  | -9 | 62.1970 | 7.08575 | 13 |
| -6 | -1 | 9  | 27.6353 | 4.69720 | 10 |
| 6  | -1 | -9 | 22.8568 | 4.44639 | 13 |
| -6 | 1  | 9  | 29.0239 | 4.61502 | 10 |
| 6  | 1  | -9 | 31.6247 | 5.32476 | 13 |
| -5 | -1 | 9  | 32.5491 | 6.57509 | 1  |
| -5 | -1 | 9  | 25.9217 | 4.69720 | 10 |
| -5 | 1  | 9  | 29.4280 | 4.60520 | 10 |
| -4 | -1 | 9  | 84.6850 | 9.52989 | 1  |
| -3 | -1 | 9  | 58.2547 | 7.78212 | 1  |
| 1  | -1 | -9 | 237.410 | 15.8535 | 5  |
| 1  | 1  | -9 | 182.120 | 14.7958 | 5  |
| 0  | 1  | -9 | 14.2348 | 2.11725 | 5  |
| -1 | -1 | -9 | 43.9506 | 5.78859 | 1  |
| -1 | -1 | -9 | 32.7243 | 3.83904 | 8  |
| -1 | 1  | -9 | 37.2508 | 5.02620 | 1  |
| -2 | -1 | -9 | 4.36922 | 2.57790 | 1  |
| -2 | -1 | -9 | 3.12793 | 1.57058 | 8  |
| -2 | 1  | -9 | 5.87413 | 1.64941 | 8  |
| 3  | -1 | 9  | 16.9594 | 3.72462 | 13 |
| 3  | 1  | 9  | 25.7311 | 4.83316 | 13 |
| -3 | 1  | -9 | 14.0000 | 2.85951 | 10 |
| -3 | 1  | -9 | 16.1649 | 2.45236 | 8  |
| -4 | -1 | -9 | 7.63381 | 2.22864 | 10 |
| 4  | -1 | 9  | 17.9096 | 5.38638 | 13 |
| -4 | -1 | -9 | 5.98424 | 2.16285 | 8  |
| -4 | -1 | -9 | 8.87920 | 2.87840 | 12 |
| 4  | 1  | 9  | 6.32142 | 3.14551 | 13 |
| -4 | 1  | -9 | 7.15119 | 2.81646 | 12 |
| -4 | 1  | -9 | 8.27431 | 1.80690 | 8  |
| 5  | -1 | 9  | 6.48467 | 3.58168 | 13 |
| -5 | -1 | -9 | 6.24378 | 2.12629 | 8  |
| -5 | -1 | -9 | 4.17636 | 2.40390 | 12 |
| 5  | 1  | 9  | 4.20394 | 3.15209 | 13 |
| -5 | 1  | -9 | 9.59447 | 1.89978 | 8  |
| -5 | 1  | -9 | 9.50750 | 1.29910 | 11 |
| -6 | -1 | -9 | 6.86084 | 1.56691 | 8  |
| 6  | -1 | 9  | 4.61356 | 3.02140 | 13 |
| 6  | 1  | 9  | 6.59331 | 2.77275 | 13 |
| -6 | 1  | -9 | 5.52104 | 1.29179 | 8  |
| 7  | -1 | 9  | 18.1687 | 2.85656 | 13 |
| 7  | 1  | 9  | 17.5829 | 3.36060 | 13 |
| -9 | -2 | 9  | 0.24251 | 1.92395 | 10 |
| 9  | -2 | -9 | -2.6243 | 3.02055 | 13 |
| -9 | 2  | 9  | -0.2942 | 0.97557 | 11 |
| 9  | 2  | -9 | 4.04277 | 3.06075 | 13 |
| 8  | -2 | -9 | 46.7109 | 6.77812 | 13 |
| -8 | -2 | 9  | 52.7055 | 5.85467 | 10 |

|    |    |    |         |         |    |
|----|----|----|---------|---------|----|
| 8  | 2  | -9 | 54.3320 | 7.24538 | 13 |
| -8 | 2  | 9  | 53.5729 | 5.28352 | 10 |
| -7 | -2 | 9  | 257.133 | 17.7033 | 10 |
| 7  | -2 | -9 | 249.295 | 17.8592 | 13 |
| 7  | 2  | -9 | 258.015 | 17.6077 | 13 |
| -7 | 2  | 9  | 244.528 | 17.3270 | 10 |
| 6  | -2 | -9 | 71.5768 | 7.96962 | 13 |
| -6 | -2 | 9  | 93.0049 | 7.91460 | 10 |
| -6 | 2  | 9  | 71.9728 | 7.30214 | 10 |
| 6  | 2  | -9 | 97.4446 | 7.91142 | 13 |
| -5 | -2 | 9  | 38.2235 | 5.42200 | 10 |
| -5 | -2 | 9  | 43.6533 | 8.25203 | 1  |
| -5 | 2  | 9  | 55.5754 | 5.72798 | 10 |
| -4 | -2 | 9  | 46.3554 | 7.42602 | 1  |
| -3 | -2 | 9  | 153.882 | 13.6403 | 1  |
| 2  | 2  | -9 | 174.587 | 13.5916 | 5  |
| 1  | -2 | -9 | 68.1184 | 6.97648 | 5  |
| 1  | 2  | -9 | 59.7867 | 6.02383 | 5  |
| 0  | -2 | -9 | 173.544 | 13.0996 | 5  |
| -1 | -2 | -9 | 151.439 | 11.8341 | 1  |
| -1 | -2 | -9 | 123.720 | 9.95478 | 8  |
| -1 | 2  | -9 | 144.002 | 9.53631 | 8  |
| -1 | 2  | -9 | 147.437 | 11.0365 | 1  |
| -2 | -2 | -9 | 32.4220 | 3.51804 | 8  |
| -2 | -2 | -9 | 35.1212 | 5.34628 | 1  |
| -2 | 2  | -9 | 34.1529 | 3.33548 | 8  |
| -3 | -2 | -9 | 8.14884 | 2.04293 | 8  |
| -3 | 2  | -9 | 8.32327 | 2.12270 | 8  |
| -4 | -2 | -9 | 15.4463 | 2.70646 | 8  |
| -4 | -2 | -9 | 15.3716 | 2.93134 | 10 |
| -4 | 2  | -9 | 21.1285 | 2.88360 | 8  |
| 4  | 2  | 9  | 14.2800 | 3.68244 | 13 |
| -4 | 2  | -9 | 20.1702 | 3.07284 | 12 |
| -5 | -2 | -9 | 63.9251 | 5.14207 | 8  |
| 5  | 2  | 9  | 52.9620 | 6.83304 | 13 |
| -5 | 2  | -9 | 65.3134 | 4.84149 | 8  |
| -5 | 2  | -9 | 67.0965 | 5.86951 | 12 |
| -6 | -2 | -9 | 12.1660 | 1.94815 | 8  |
| 6  | 2  | 9  | 9.78480 | 3.56858 | 13 |
| 7  | 2  | 9  | 51.0044 | 5.34460 | 13 |
| 9  | -3 | -9 | 6.00415 | 3.05778 | 13 |
| -9 | 3  | 9  | 3.77343 | 1.85270 | 7  |
| -9 | 3  | 9  | 5.84085 | 1.21590 | 11 |
| 9  | 3  | -9 | 10.4372 | 3.83369 | 13 |
| -8 | -3 | 9  | 0.08521 | 2.57897 | 10 |
| 8  | -3 | -9 | 2.49052 | 3.15402 | 13 |
| -8 | 3  | 9  | 0.95579 | 1.95103 | 10 |
| 7  | -3 | -9 | 54.3065 | 6.59308 | 13 |
| -7 | -3 | 9  | 49.0962 | 6.09018 | 10 |
| -7 | 3  | 9  | 53.6093 | 5.66115 | 10 |

|    |    |    |         |         |    |
|----|----|----|---------|---------|----|
| 7  | 3  | -9 | 55.1688 | 7.37822 | 13 |
| -6 | -3 | 9  | 122.047 | 12.1459 | 1  |
| -6 | -3 | 9  | 108.316 | 10.0394 | 10 |
| 6  | -3 | -9 | 128.866 | 9.50454 | 13 |
| -6 | 3  | 9  | 131.366 | 9.83605 | 10 |
| 6  | 3  | -9 | 99.0383 | 9.92233 | 13 |
| -5 | -3 | 9  | 5.37267 | 2.89951 | 10 |
| -5 | -3 | 9  | 5.37237 | 4.19516 | 1  |
| -4 | -3 | 9  | 39.9787 | 7.09747 | 1  |
| -3 | 3  | 9  | 234.673 | 18.4715 | 5  |
| 2  | 3  | -9 | 89.6293 | 8.03133 | 5  |
| 1  | -3 | -9 | 40.9749 | 5.77676 | 5  |
| 1  | 3  | -9 | 52.9684 | 4.82660 | 5  |
| 0  | -3 | -9 | 109.616 | 9.67175 | 5  |
| -1 | -3 | -9 | 17.8560 | 4.56107 | 1  |
| -1 | -3 | -9 | 18.9742 | 2.88998 | 8  |
| -1 | 3  | -9 | 23.8458 | 3.79352 | 1  |
| -1 | 3  | -9 | 25.6263 | 2.99890 | 8  |
| -2 | -3 | -9 | 47.5572 | 5.98756 | 1  |
| -2 | -3 | -9 | 45.0727 | 4.23134 | 8  |
| -2 | -3 | -9 | 55.8530 | 5.87637 | 10 |
| -2 | 3  | -9 | 38.4695 | 4.02283 | 8  |
| -3 | -3 | -9 | 0.01375 | 2.02106 | 10 |
| -3 | -3 | -9 | 2.90817 | 2.66430 | 1  |
| -3 | -3 | -9 | 2.33631 | 1.62235 | 8  |
| -3 | 3  | -9 | 6.28074 | 2.90514 | 14 |
| 3  | 3  | 9  | 1.72785 | 3.63719 | 13 |
| -3 | 3  | -9 | 3.92928 | 1.65602 | 8  |
| -3 | 3  | -9 | 0.90026 | 2.27995 | 12 |
| -4 | -3 | -9 | 94.6585 | 7.13515 | 8  |
| -4 | -3 | -9 | 93.9616 | 7.69134 | 10 |
| 4  | 3  | 9  | 97.8192 | 8.78521 | 13 |
| -4 | 3  | -9 | 99.0044 | 6.87424 | 8  |
| -4 | 3  | -9 | 96.3151 | 7.78601 | 12 |
| -4 | 3  | -9 | 97.8334 | 6.43179 | 11 |
| -5 | -3 | -9 | 2.74557 | 2.07856 | 8  |
| 5  | 3  | 9  | 3.85545 | 3.03418 | 13 |
| -5 | 3  | -9 | 3.41721 | 2.25796 | 12 |
| -5 | 3  | -9 | 5.41262 | 1.37302 | 8  |
| -6 | -3 | -9 | -0.7786 | 1.52115 | 8  |
| -6 | 3  | -9 | 2.41571 | 1.84333 | 12 |
| 6  | 3  | 9  | -3.8013 | 3.14534 | 13 |
| 7  | 3  | 9  | 27.9985 | 4.45494 | 13 |
| 9  | -4 | -9 | -1.8987 | 2.79830 | 13 |
| -9 | -4 | 9  | 2.14508 | 2.05781 | 10 |
| -9 | 4  | 9  | 1.72876 | 1.58715 | 7  |
| 9  | 4  | -9 | 1.40255 | 2.75034 | 13 |
| -9 | 4  | 9  | 1.86973 | 0.81890 | 11 |
| -8 | -4 | 9  | 29.3953 | 4.75419 | 10 |
| 8  | -4 | -9 | 35.7526 | 5.79990 | 13 |

|    |    |    |         |         |    |
|----|----|----|---------|---------|----|
| 8  | 4  | -9 | 30.3674 | 4.52984 | 13 |
| 8  | 4  | -9 | 29.0941 | 4.66404 | 13 |
| -8 | 4  | 9  | 31.9232 | 4.14111 | 10 |
| -7 | -4 | 9  | 85.9444 | 7.66076 | 10 |
| -7 | -4 | 9  | 88.5253 | 10.4346 | 1  |
| 7  | -4 | -9 | 53.4709 | 7.20628 | 13 |
| 7  | 4  | -9 | 85.5607 | 8.87699 | 13 |
| -6 | -4 | 9  | 7.84243 | 4.55522 | 1  |
| -6 | -4 | 9  | 8.18860 | 3.09912 | 10 |
| 6  | 4  | -9 | 10.3824 | 3.63916 | 13 |
| -5 | -4 | 9  | 4.66821 | 4.18641 | 1  |
| -5 | -4 | 9  | 8.58692 | 3.04287 | 10 |
| -4 | -4 | 9  | 22.6234 | 5.51610 | 1  |
| -3 | 4  | 9  | 11.6278 | 3.73403 | 5  |
| 2  | 4  | -9 | 6.24112 | 2.49345 | 5  |
| 1  | 4  | -9 | 386.978 | 24.5089 | 5  |
| 0  | -4 | -9 | 375.077 | 25.8276 | 5  |
| -1 | -4 | -9 | 162.980 | 10.5565 | 8  |
| -1 | -4 | -9 | 169.579 | 13.2048 | 1  |
| -1 | 4  | -9 | 130.213 | 10.4180 | 4  |
| -1 | 4  | -9 | 144.703 | 10.1356 | 8  |
| -2 | -4 | -9 | 3.81015 | 2.30365 | 10 |
| -2 | -4 | -9 | 2.88831 | 2.73512 | 1  |
| -2 | 4  | -9 | 4.43385 | 1.59508 | 8  |
| -3 | -4 | -9 | 85.2603 | 6.60602 | 8  |
| -3 | -4 | -9 | 83.1317 | 7.03119 | 10 |
| -3 | -4 | -9 | 84.6363 | 8.17525 | 1  |
| -3 | 4  | -9 | 79.2590 | 6.96685 | 12 |
| -3 | 4  | -9 | 82.2473 | 7.33908 | 14 |
| -3 | 4  | -9 | 79.7582 | 6.01664 | 8  |
| 3  | 4  | 9  | 79.2978 | 7.93509 | 13 |
| -4 | -4 | -9 | 54.2072 | 5.02964 | 8  |
| -4 | -4 | -9 | 54.4811 | 5.45402 | 10 |
| -4 | 4  | -9 | 59.9545 | 3.78832 | 11 |
| -4 | 4  | -9 | 61.8742 | 6.26705 | 12 |
| 4  | 4  | 9  | 54.3758 | 7.60674 | 13 |
| -4 | 4  | -9 | 62.1179 | 4.56527 | 8  |
| -5 | -4 | -9 | 38.7511 | 4.04121 | 10 |
| -5 | -4 | -9 | 36.1802 | 3.83887 | 8  |
| -5 | 4  | -9 | 31.4593 | 2.96397 | 8  |
| -5 | 4  | -9 | 33.8938 | 4.39289 | 12 |
| 5  | 4  | 9  | 38.8896 | 5.97210 | 13 |
| -6 | -4 | -9 | 43.4413 | 3.83021 | 8  |
| -6 | -4 | -9 | 46.8251 | 3.38921 | 11 |
| -6 | 4  | -9 | 43.4448 | 4.80610 | 12 |
| 6  | 4  | 9  | 43.9102 | 5.68308 | 13 |
| 7  | 4  | 9  | 48.4286 | 4.74849 | 13 |
| 9  | -5 | -9 | 12.5344 | 3.17405 | 13 |
| -9 | 5  | 9  | 12.2991 | 2.12181 | 7  |
| -9 | 5  | 9  | 13.4113 | 1.28300 | 11 |

|    |    |    |         |         |    |
|----|----|----|---------|---------|----|
| 8  | -5 | -9 | 32.1529 | 5.72664 | 13 |
| -8 | -5 | 9  | 46.9916 | 5.29131 | 10 |
| -8 | 5  | 9  | 34.7537 | 3.23189 | 11 |
| -8 | 5  | 9  | 32.1490 | 3.96609 | 10 |
| 8  | 5  | -9 | 40.9546 | 6.16682 | 13 |
| 7  | -5 | -9 | 63.0197 | 8.26110 | 13 |
| -7 | -5 | 9  | 94.6969 | 10.3915 | 1  |
| -7 | -5 | 9  | 95.1499 | 8.15559 | 10 |
| 7  | 5  | -9 | 87.0445 | 8.10920 | 13 |
| 7  | 5  | -9 | 88.1649 | 7.87038 | 13 |
| 6  | -5 | -9 | 27.4960 | 4.41654 | 13 |
| -6 | -5 | 9  | 34.8564 | 7.35991 | 1  |
| -6 | -5 | 9  | 39.1234 | 5.15843 | 10 |
| 6  | 5  | -9 | 37.1411 | 5.11995 | 13 |
| -6 | 5  | 9  | 24.1641 | 4.69928 | 10 |
| -5 | -5 | 9  | 79.8563 | 9.95992 | 1  |
| -5 | -5 | 9  | 69.4015 | 7.15104 | 10 |
| -5 | 5  | 9  | 74.9551 | 7.51213 | 10 |
| -4 | -5 | 9  | 42.6353 | 7.37672 | 1  |
| 0  | -5 | -9 | 41.8018 | 5.61102 | 5  |
| -1 | -5 | -9 | 237.256 | 19.0446 | 1  |
| -1 | 5  | -9 | 251.830 | 16.5958 | 4  |
| -1 | 5  | -9 | 265.633 | 16.2065 | 8  |
| -2 | -5 | -9 | 13.7235 | 2.54273 | 8  |
| -2 | -5 | -9 | 11.4043 | 3.02195 | 10 |
| -2 | -5 | -9 | 14.0849 | 3.94532 | 1  |
| -2 | 5  | -9 | 14.8835 | 2.22356 | 8  |
| -3 | -5 | -9 | 1.96550 | 2.15769 | 10 |
| -3 | -5 | -9 | 2.96030 | 3.10968 | 1  |
| -3 | -5 | -9 | 3.13331 | 1.84424 | 8  |
| 3  | 5  | 9  | 1.67189 | 3.67662 | 13 |
| -3 | 5  | -9 | 0.18109 | 1.36300 | 8  |
| -3 | 5  | -9 | -0.8587 | 2.08572 | 12 |
| -3 | 5  | -9 | -0.2247 | 2.06769 | 14 |
| -4 | -5 | -9 | 26.2745 | 4.45606 | 10 |
| -4 | -5 | -9 | 27.9467 | 3.64836 | 8  |
| -4 | 5  | -9 | 30.3589 | 4.37039 | 12 |
| 4  | 5  | 9  | 24.9064 | 4.39750 | 13 |
| -4 | 5  | -9 | 31.9107 | 2.88642 | 8  |
| -5 | -5 | -9 | 30.1451 | 3.98834 | 10 |
| -5 | -5 | -9 | 27.9042 | 3.61914 | 8  |
| 5  | 5  | 9  | 26.6099 | 4.50967 | 13 |
| -5 | 5  | -9 | 31.4561 | 4.31134 | 12 |
| -6 | -5 | -9 | 35.7061 | 3.23069 | 8  |
| -6 | 5  | -9 | 29.2610 | 2.54390 | 9  |
| -6 | 5  | -9 | 29.9224 | 3.79703 | 12 |
| -6 | 5  | -9 | 29.5580 | 2.16835 | 6  |
| 6  | 5  | 9  | 33.2016 | 5.44350 | 13 |
| 7  | 5  | 9  | 6.30480 | 2.06075 | 13 |
| -9 | -6 | 9  | 9.47810 | 2.56366 | 10 |

|    |    |    |         |         |    |
|----|----|----|---------|---------|----|
| -9 | 6  | 9  | 8.51963 | 1.86544 | 7  |
| 8  | -6 | -9 | 25.8344 | 4.54369 | 13 |
| -8 | -6 | 9  | 26.0223 | 3.81540 | 10 |
| -8 | 6  | 9  | 26.2141 | 3.30077 | 7  |
| 8  | 6  | -9 | 26.0609 | 4.28550 | 13 |
| -8 | 6  | 9  | 20.4987 | 2.49836 | 11 |
| -7 | -6 | 9  | 159.242 | 11.9996 | 10 |
| -7 | -6 | 9  | 162.163 | 14.3160 | 1  |
| 7  | -6 | -9 | 147.997 | 12.0261 | 13 |
| -7 | 6  | 9  | 139.768 | 10.9364 | 10 |
| 7  | 6  | -9 | 162.663 | 12.2693 | 13 |
| 7  | 6  | -9 | 149.275 | 12.5027 | 13 |
| 6  | -6 | -9 | 66.6212 | 6.70048 | 13 |
| -6 | 6  | 9  | 67.7347 | 6.37070 | 10 |
| 5  | -6 | -9 | 13.5887 | 3.36949 | 13 |
| -5 | -6 | 9  | 16.0473 | 5.31542 | 1  |
| -5 | 6  | 9  | 15.2531 | 3.80340 | 10 |
| -2 | 6  | 9  | 31.1314 | 6.36641 | 5  |
| 0  | 6  | -9 | 68.5650 | 5.22506 | 8  |
| -1 | -6 | -9 | 151.297 | 13.8553 | 1  |
| -1 | 6  | -9 | 180.405 | 11.1682 | 8  |
| -2 | -6 | -9 | 29.5728 | 5.75503 | 1  |
| -2 | -6 | -9 | 29.2051 | 3.55613 | 8  |
| -2 | -6 | -9 | 26.6356 | 4.40274 | 10 |
| -2 | 6  | -9 | 33.2244 | 4.22334 | 12 |
| -2 | 6  | -9 | 29.2987 | 3.12437 | 8  |
| -3 | -6 | -9 | 91.5949 | 6.48526 | 8  |
| -3 | -6 | -9 | 94.0592 | 9.20325 | 1  |
| -3 | -6 | -9 | 86.1903 | 7.13891 | 10 |
| -3 | 6  | -9 | 77.8929 | 5.33484 | 11 |
| -3 | 6  | -9 | 73.8627 | 5.24110 | 11 |
| -3 | 6  | -9 | 75.9383 | 6.86140 | 12 |
| -3 | 6  | -9 | 72.5667 | 6.70029 | 14 |
| 3  | 6  | 9  | 87.2674 | 8.44546 | 13 |
| -3 | 6  | -9 | 78.3031 | 5.77118 | 8  |
| -4 | -6 | -9 | 149.281 | 10.1133 | 10 |
| -4 | -6 | -9 | 138.488 | 9.54794 | 8  |
| 4  | 6  | 9  | 132.792 | 10.9015 | 13 |
| -4 | 6  | -9 | 127.644 | 9.94760 | 12 |
| -4 | 6  | -9 | 122.254 | 8.74140 | 8  |
| -5 | -6 | -9 | 3.83781 | 2.14782 | 10 |
| -5 | -6 | -9 | 4.35508 | 2.02421 | 8  |
| -5 | 6  | -9 | 6.65433 | 2.45926 | 12 |
| 5  | 6  | 9  | -0.9840 | 3.46269 | 13 |
| -5 | 6  | -9 | 5.92280 | 1.22472 | 9  |
| -6 | -6 | -9 | 2.40108 | 1.56509 | 8  |
| -6 | 6  | -9 | 5.56538 | 0.70410 | 6  |
| -6 | 6  | -9 | 6.11534 | 1.20050 | 9  |
| -6 | 6  | -9 | 4.14862 | 2.12127 | 12 |
| 6  | 6  | 9  | 4.59629 | 3.02886 | 13 |

|    |    |    |         |         |    |
|----|----|----|---------|---------|----|
| 9  | -7 | -9 | 22.3243 | 4.16646 | 13 |
| -9 | -7 | 9  | 17.7410 | 3.35300 | 10 |
| -8 | -7 | 9  | 48.7275 | 5.56212 | 10 |
| 8  | -7 | -9 | 48.6772 | 6.19706 | 13 |
| -8 | 7  | 9  | 42.9328 | 3.56578 | 11 |
| -8 | 7  | 9  | 41.2509 | 4.21353 | 7  |
| -7 | -7 | 9  | 37.3092 | 5.67736 | 10 |
| 7  | -7 | -9 | 39.3521 | 5.38493 | 13 |
| -7 | 7  | 9  | 38.1167 | 4.39250 | 10 |
| -6 | -7 | 9  | 235.456 | 17.5466 | 10 |
| -6 | -7 | 9  | 249.210 | 20.4429 | 1  |
| 6  | -7 | -9 | 250.770 | 17.0912 | 13 |
| -6 | 7  | 9  | 253.851 | 17.0518 | 10 |
| 5  | -7 | -9 | 31.1995 | 4.81500 | 13 |
| -5 | -7 | 9  | 29.1446 | 6.36010 | 1  |
| -5 | 7  | 9  | 23.7250 | 4.51138 | 10 |
| 5  | 7  | -9 | 24.8557 | 4.72007 | 10 |
| 4  | 7  | -9 | 41.0118 | 6.31817 | 10 |
| -4 | 7  | 9  | 41.6821 | 5.32833 | 10 |
| 0  | 7  | -9 | 60.5659 | 5.15073 | 4  |
| -1 | -7 | -9 | 118.814 | 11.5305 | 1  |
| -1 | 7  | -9 | 122.964 | 8.33663 | 8  |
| -2 | -7 | -9 | 11.2259 | 2.93033 | 10 |
| -2 | -7 | -9 | 16.1401 | 4.91642 | 1  |
| -2 | 7  | -9 | 12.1614 | 1.54912 | 11 |
| -2 | 7  | -9 | 11.3891 | 3.07986 | 12 |
| -2 | 7  | -9 | 13.2432 | 3.60086 | 14 |
| -2 | 7  | -9 | 12.5867 | 1.81827 | 8  |
| 2  | 7  | 9  | 12.1688 | 3.87329 | 13 |
| -3 | -7 | -9 | 4.72358 | 3.79088 | 1  |
| -3 | -7 | -9 | 2.08030 | 2.34739 | 10 |
| -3 | -7 | -9 | 3.68190 | 2.01180 | 8  |
| -3 | 7  | -9 | 1.85134 | 2.30347 | 12 |
| 3  | 7  | 9  | 3.71760 | 3.07832 | 13 |
| -3 | 7  | -9 | 2.23783 | 2.18362 | 14 |
| -3 | 7  | -9 | 2.72405 | 1.26400 | 8  |
| -4 | -7 | -9 | 58.8496 | 5.69353 | 10 |
| -4 | -7 | -9 | 55.2172 | 5.20193 | 8  |
| 4  | 7  | 9  | 59.6476 | 7.77566 | 13 |
| -4 | 7  | -9 | 57.2077 | 5.63630 | 12 |
| -4 | 7  | -9 | 55.0423 | 4.29404 | 9  |
| -5 | -7 | -9 | 21.4235 | 3.87280 | 10 |
| -5 | -7 | -9 | 19.6656 | 3.34555 | 8  |
| -5 | 7  | -9 | 21.0686 | 3.32620 | 12 |
| -5 | 7  | -9 | 25.4705 | 1.89718 | 6  |
| 5  | 7  | 9  | 20.6095 | 4.79554 | 13 |
| -5 | 7  | -9 | 25.8437 | 2.21499 | 9  |
| -6 | -7 | -9 | 0.66546 | 1.47246 | 8  |
| 6  | 7  | 9  | 0.31371 | 2.76342 | 13 |
| -6 | 7  | -9 | 0.98354 | 1.81711 | 12 |

|    |    |    |         |         |    |
|----|----|----|---------|---------|----|
| -6 | 7  | -9 | 2.02956 | 0.51367 | 6  |
| -6 | 7  | -9 | 2.20563 | 0.83974 | 9  |
| 9  | -8 | -9 | 14.8385 | 2.86334 | 13 |
| -9 | -8 | 9  | 16.9645 | 2.60927 | 10 |
| 8  | -8 | -9 | 1.14011 | 3.81814 | 13 |
| -8 | 8  | 9  | 11.9944 | 1.63036 | 11 |
| -8 | 8  | 9  | 6.74949 | 1.97480 | 7  |
| -7 | -8 | 9  | 89.2591 | 8.14604 | 10 |
| 7  | -8 | -9 | 74.6398 | 7.73324 | 13 |
| -6 | -8 | 9  | 88.0546 | 10.4134 | 1  |
| -6 | -8 | 9  | 74.2162 | 7.54558 | 10 |
| 6  | -8 | -9 | 69.1148 | 7.33034 | 13 |
| -6 | 8  | 9  | 66.6009 | 6.62993 | 10 |
| -5 | -8 | 9  | 29.3662 | 6.79814 | 1  |
| 5  | -8 | -9 | 36.4703 | 5.04904 | 13 |
| -5 | 8  | 9  | 29.2817 | 4.71433 | 10 |
| 5  | 8  | -9 | 33.6304 | 5.45895 | 10 |
| 4  | -8 | -9 | 0.42345 | 3.73345 | 2  |
| 3  | -8 | -9 | 31.8406 | 6.95440 | 2  |
| 0  | -8 | -9 | 35.5469 | 6.88013 | 1  |
| -1 | -8 | -9 | 69.6459 | 6.73987 | 10 |
| -1 | -8 | -9 | 66.9345 | 8.59215 | 1  |
| -2 | -8 | -9 | 76.7182 | 6.94904 | 10 |
| -2 | -8 | -9 | 85.4058 | 9.62393 | 1  |
| -2 | 8  | -9 | 64.3337 | 6.34453 | 12 |
| -2 | 8  | -9 | 68.9157 | 6.51762 | 14 |
| 2  | 8  | 9  | 74.1308 | 7.97345 | 13 |
| -2 | 8  | -9 | 62.2172 | 4.79536 | 11 |
| -3 | -8 | -9 | 208.788 | 16.2313 | 1  |
| -3 | -8 | -9 | 202.513 | 14.0806 | 10 |
| -3 | -8 | -9 | 203.785 | 13.4579 | 8  |
| -3 | 8  | -9 | 184.666 | 13.6423 | 12 |
| 3  | 8  | 9  | 209.391 | 14.9328 | 13 |
| -3 | 8  | -9 | 180.620 | 13.8243 | 14 |
| -4 | -8 | -9 | 31.4937 | 4.62668 | 10 |
| -4 | -8 | -9 | 34.0492 | 5.54173 | 1  |
| -4 | -8 | -9 | 27.6912 | 4.14107 | 8  |
| -4 | 8  | -9 | 30.1809 | 2.92059 | 9  |
| -4 | 8  | -9 | 33.0454 | 2.41723 | 6  |
| 4  | 8  | 9  | 31.2297 | 4.90820 | 13 |
| -4 | 8  | -9 | 44.1026 | 4.84120 | 12 |
| -5 | -8 | -9 | 31.3707 | 3.55584 | 8  |
| -5 | -8 | -9 | 26.6087 | 3.57495 | 10 |
| -5 | 8  | -9 | 17.7679 | 1.69045 | 6  |
| -5 | 8  | -9 | 23.8951 | 3.29839 | 12 |
| 5  | 8  | 9  | 23.6842 | 4.25473 | 13 |
| -5 | 8  | -9 | 21.9225 | 2.22444 | 9  |
| -6 | -8 | -9 | 50.3478 | 4.50919 | 8  |
| -6 | 8  | -9 | 60.9811 | 4.98777 | 12 |
| 6  | 8  | 9  | 57.5193 | 5.85958 | 13 |



|    |    |    |         |         |    |
|----|----|----|---------|---------|----|
| -6 | 8  | -9 | 54.1124 | 3.64936 | 9  |
| 9  | -9 | -9 | 12.7852 | 2.50116 | 13 |
| -9 | -9 | 9  | 6.27971 | 1.84863 | 10 |
| 8  | -9 | -9 | 2.86408 | 2.76156 | 13 |
| -8 | -9 | 9  | 3.53693 | 2.13268 | 10 |
| -8 | 9  | 9  | 3.49524 | 0.75247 | 11 |
| -8 | 9  | 9  | 3.35453 | 0.74603 | 11 |
| 7  | -9 | -9 | 105.521 | 9.01763 | 13 |
| -7 | -9 | 9  | 114.485 | 9.48545 | 10 |
| -7 | 9  | 9  | 108.532 | 7.39397 | 11 |
| 6  | -9 | -9 | 40.3991 | 5.39467 | 13 |
| -6 | 9  | 9  | 37.5129 | 4.41944 | 10 |
| 5  | -9 | -9 | 14.9568 | 3.15881 | 13 |
| -5 | 9  | 9  | 13.8998 | 3.15952 | 10 |
| -4 | -9 | 9  | 100.006 | 9.00845 | 13 |
| 4  | -9 | -9 | 92.7918 | 8.74618 | 13 |
| 4  | -9 | -9 | 92.1294 | 10.5489 | 2  |
| 4  | 9  | -9 | 95.9614 | 8.46694 | 10 |
| -4 | 9  | 9  | 96.3741 | 8.28503 | 10 |
| 3  | -9 | -9 | 71.4472 | 8.31579 | 2  |
| -3 | 9  | 9  | 68.1726 | 6.64312 | 10 |
| 3  | 9  | -9 | 58.9351 | 6.41091 | 10 |
| 2  | -9 | -9 | 3.86585 | 3.27141 | 2  |
| 0  | -9 | -9 | 20.9236 | 5.19287 | 1  |
| -1 | -9 | -9 | 21.1429 | 3.85047 | 10 |
| -1 | -9 | -9 | 26.6123 | 5.98098 | 1  |
| -1 | 9  | -9 | 19.1156 | 2.56446 | 11 |
| -2 | -9 | -9 | 81.0033 | 9.20299 | 1  |
| -2 | -9 | -9 | 73.4681 | 6.83888 | 10 |
| 2  | 9  | 9  | 74.0952 | 7.86159 | 13 |
| -2 | 9  | -9 | 67.2343 | 6.78390 | 14 |
| -2 | 9  | -9 | 60.9874 | 4.46619 | 11 |
| -2 | 9  | -9 | 61.2730 | 6.05997 | 12 |
| -2 | 9  | -9 | 65.4574 | 4.62950 | 11 |
| -3 | -9 | -9 | 50.2126 | 5.68594 | 10 |
| -3 | -9 | -9 | 50.0849 | 8.07227 | 1  |
| -3 | 9  | -9 | 50.7887 | 5.54431 | 14 |
| -3 | 9  | -9 | 49.4759 | 3.83638 | 9  |
| -3 | 9  | -9 | 47.6615 | 5.21729 | 12 |
| 3  | 9  | 9  | 61.3215 | 7.71008 | 13 |
| -4 | -9 | -9 | 100.188 | 8.50872 | 10 |
| -4 | -9 | -9 | 105.998 | 10.7900 | 1  |
| -4 | -9 | -9 | 100.129 | 7.93830 | 8  |
| -4 | 9  | -9 | 101.158 | 6.78958 | 9  |
| -4 | 9  | -9 | 103.401 | 6.61522 | 6  |
| -4 | 9  | -9 | 113.398 | 8.42019 | 12 |
| 4  | 9  | 9  | 97.5125 | 9.57016 | 13 |
| -4 | 9  | -9 | 121.189 | 9.75125 | 14 |
| -5 | -9 | -9 | 3.82388 | 1.62607 | 8  |
| -5 | -9 | -9 | 4.26962 | 2.29689 | 10 |

|    |     |    |         |         |    |
|----|-----|----|---------|---------|----|
| -5 | 9   | -9 | 2.91919 | 1.05012 | 9  |
| -5 | 9   | -9 | 5.18559 | 0.68250 | 6  |
| -5 | 9   | -9 | 2.99192 | 2.52437 | 12 |
| -6 | -9  | -9 | 2.31749 | 1.58212 | 8  |
| -6 | -9  | -9 | 2.78745 | 1.49447 | 10 |
| -6 | 9   | -9 | 1.95251 | 1.87237 | 12 |
| -6 | 9   | -9 | 0.84048 | 0.65847 | 9  |
| -6 | 9   | -9 | 2.30424 | 0.58422 | 9  |
| 6  | 9   | 9  | 2.73017 | 2.37876 | 13 |
| -9 | -10 | 9  | 3.55329 | 2.00116 | 10 |
| 9  | -10 | -9 | 4.19197 | 2.44501 | 13 |
| -8 | -10 | 9  | 38.4516 | 4.95545 | 10 |
| 8  | -10 | -9 | 33.0758 | 4.61272 | 13 |
| 7  | -10 | -9 | 53.3566 | 6.28793 | 13 |
| -7 | -10 | 9  | 42.2198 | 6.07782 | 10 |
| -7 | 10  | 9  | 57.7266 | 4.03183 | 11 |
| 6  | -10 | -9 | 3.99287 | 2.78619 | 13 |
| -6 | 10  | 9  | 6.90789 | 2.13798 | 10 |
| 5  | -10 | -9 | 29.1210 | 4.96598 | 13 |
| 5  | 10  | -9 | 28.2526 | 5.43557 | 10 |
| -5 | 10  | 9  | 38.9345 | 4.81564 | 10 |
| 4  | -10 | -9 | 45.2187 | 6.02543 | 13 |
| 4  | -10 | -9 | 53.4414 | 9.40407 | 2  |
| -4 | -10 | 9  | 62.7782 | 6.69879 | 13 |
| -4 | 10  | 9  | 51.6934 | 6.04081 | 10 |
| 4  | 10  | -9 | 57.9608 | 6.36915 | 10 |
| 3  | -10 | -9 | 97.5705 | 10.2026 | 2  |
| 3  | 10  | -9 | 92.1285 | 8.00202 | 10 |
| -3 | 10  | 9  | 90.9519 | 8.18465 | 10 |
| 2  | -10 | -9 | 69.6177 | 8.32580 | 2  |
| 2  | 10  | -9 | 64.8012 | 6.55014 | 10 |
| -2 | 10  | 9  | 65.5337 | 7.02213 | 10 |
| 1  | -10 | -9 | 4.53741 | 3.40296 | 2  |
| 0  | -10 | -9 | 290.651 | 22.1108 | 1  |
| 0  | 10  | -9 | 287.413 | 18.9518 | 10 |
| 0  | 10  | 9  | 273.529 | 20.0540 | 10 |
| -1 | -10 | -9 | 111.182 | 12.0807 | 1  |
| -1 | -10 | -9 | 107.275 | 9.63585 | 10 |
| -1 | 10  | -9 | 128.138 | 7.95031 | 11 |
| -1 | 10  | -9 | 125.036 | 8.94345 | 12 |
| -1 | 10  | -9 | 125.119 | 9.53443 | 14 |
| -2 | -10 | -9 | 2.31208 | 2.62105 | 10 |
| -2 | -10 | -9 | 4.08510 | 3.81918 | 1  |
| -2 | 10  | -9 | 8.72330 | 2.89641 | 12 |
| 2  | 10  | 9  | 5.99335 | 3.65903 | 13 |
| -2 | 10  | -9 | 5.06385 | 2.41773 | 14 |
| -3 | -10 | -9 | 40.0450 | 5.51479 | 10 |
| -3 | -10 | -9 | 42.2041 | 8.08323 | 1  |
| -3 | 10  | -9 | 53.3845 | 5.23842 | 12 |
| -3 | 10  | -9 | 50.9341 | 3.36697 | 6  |

|    |     |    |         |         |    |
|----|-----|----|---------|---------|----|
| -3 | 10  | -9 | 51.8382 | 3.57477 | 9  |
| 3  | 10  | 9  | 39.4122 | 6.09628 | 13 |
| -3 | 10  | -9 | 53.3965 | 5.69443 | 14 |
| -4 | -10 | -9 | 21.9353 | 3.24389 | 8  |
| -4 | -10 | -9 | 23.5432 | 4.21186 | 10 |
| 4  | 10  | 9  | 24.4410 | 4.96392 | 13 |
| -4 | 10  | -9 | 24.8034 | 2.33715 | 9  |
| -4 | 10  | -9 | 22.1204 | 1.96515 | 6  |
| -4 | 10  | -9 | 34.1724 | 4.85862 | 14 |
| -4 | 10  | -9 | 37.0202 | 4.62314 | 12 |
| -5 | -10 | -9 | 11.8786 | 2.38330 | 8  |
| -5 | -10 | -9 | 13.3343 | 2.66401 | 10 |
| -5 | 10  | -9 | 10.3692 | 1.21691 | 9  |
| -5 | 10  | -9 | 8.77310 | 2.68695 | 12 |
| -5 | 10  | -9 | 11.0119 | 0.97958 | 6  |
| 5  | 10  | 9  | 10.1165 | 3.99582 | 13 |
| -5 | 10  | -9 | 10.1233 | 0.91695 | 6  |
| -6 | -10 | -9 | 6.55541 | 1.70814 | 10 |
| -6 | 10  | -9 | 5.71675 | 1.97514 | 12 |
| 6  | 10  | 9  | 9.80650 | 2.52855 | 13 |
| -8 | -11 | 9  | 12.4436 | 2.67527 | 10 |
| 8  | -11 | -9 | 9.56143 | 2.66647 | 13 |
| 7  | -11 | -9 | 8.31289 | 2.85377 | 13 |
| -7 | 11  | 9  | 8.12887 | 1.29286 | 11 |
| -6 | 11  | 9  | 27.9273 | 3.52996 | 10 |
| 5  | -11 | -9 | 1.52647 | 2.51854 | 13 |
| -5 | -11 | 9  | -0.7220 | 2.16725 | 13 |
| -5 | 11  | 9  | 1.81859 | 2.21841 | 10 |
| 5  | 11  | -9 | 1.59022 | 2.92297 | 10 |
| -4 | -11 | 9  | 7.91348 | 2.82345 | 13 |
| 4  | -11 | -9 | 14.3857 | 3.50635 | 13 |
| -4 | 11  | 9  | 4.65184 | 2.70477 | 10 |
| 4  | 11  | -9 | 7.97351 | 3.10265 | 10 |
| 3  | -11 | -9 | 9.40446 | 4.40282 | 2  |
| 3  | -11 | -9 | 9.58427 | 2.79266 | 13 |
| -3 | -11 | 9  | 10.9181 | 3.68181 | 13 |
| -3 | 11  | 9  | 14.2584 | 3.73610 | 10 |
| 3  | 11  | -9 | 14.2292 | 3.22917 | 10 |
| 2  | -11 | -9 | 12.9562 | 4.72739 | 2  |
| 2  | 11  | -9 | 16.0355 | 3.04385 | 10 |
| -2 | 11  | 9  | 12.8333 | 3.60341 | 10 |
| 1  | -11 | -9 | 49.5919 | 7.41246 | 2  |
| 1  | 11  | -9 | 49.2625 | 5.26099 | 10 |
| -1 | 11  | 9  | 59.4569 | 6.76217 | 10 |
| 0  | -11 | -9 | 105.799 | 11.0327 | 1  |
| 0  | 11  | 9  | 95.5973 | 9.12176 | 10 |
| 0  | 11  | -9 | 86.7034 | 6.56583 | 11 |
| 0  | 11  | -9 | 85.9507 | 7.39519 | 14 |
| -1 | -11 | -9 | 242.831 | 18.8008 | 1  |
| -1 | -11 | -9 | 234.668 | 15.6150 | 10 |

|    |     |    |         |         |    |
|----|-----|----|---------|---------|----|
| -1 | 11  | -9 | 192.962 | 14.6853 | 14 |
| -1 | 11  | -9 | 204.001 | 13.5507 | 11 |
| -2 | -11 | -9 | 56.8622 | 6.32420 | 10 |
| -2 | -11 | -9 | 60.8480 | 8.47304 | 1  |
| -3 | -11 | -9 | 29.5347 | 6.88735 | 1  |
| -3 | 11  | -9 | 47.4436 | 3.33849 | 9  |
| 3  | 11  | 9  | 30.3331 | 5.25905 | 13 |
| -3 | 11  | -9 | 43.5795 | 5.38171 | 14 |
| -3 | 11  | -9 | 45.9333 | 2.95109 | 6  |
| -3 | 11  | -9 | 50.2456 | 5.05631 | 12 |
| -4 | -11 | -9 | 13.0124 | 3.28185 | 10 |
| -4 | 11  | -9 | 11.6231 | 1.17911 | 6  |
| -4 | 11  | -9 | 7.72918 | 3.06623 | 14 |
| 4  | 11  | 9  | 9.99556 | 3.49583 | 13 |
| -4 | 11  | -9 | 6.90349 | 2.88029 | 12 |
| -4 | 11  | -9 | 9.25680 | 1.38630 | 9  |
| -5 | -11 | -9 | 14.6237 | 2.52524 | 8  |
| -5 | -11 | -9 | 13.5797 | 2.57678 | 10 |
| -5 | 11  | -9 | 12.4361 | 2.74510 | 12 |
| -5 | 11  | -9 | 13.0596 | 1.01386 | 6  |
| 5  | 11  | 9  | 14.0151 | 3.70267 | 13 |
| -5 | 11  | -9 | 13.9026 | 1.51385 | 9  |
| -5 | 11  | -9 | 13.8012 | 1.04365 | 6  |
| -6 | -11 | -9 | 20.8279 | 3.05114 | 10 |
| 6  | 11  | 9  | 25.1371 | 4.03339 | 13 |
| -6 | 11  | -9 | 30.3138 | 3.29656 | 12 |
| 8  | -12 | -9 | 13.1517 | 2.71852 | 13 |
| -8 | -12 | 9  | 16.9142 | 3.23062 | 10 |
| 7  | -12 | -9 | 14.3391 | 3.21307 | 13 |
| -7 | 12  | 9  | 19.8298 | 1.78083 | 11 |
| -6 | 12  | 9  | 18.8963 | 2.54093 | 11 |
| 6  | 12  | -9 | 23.9329 | 4.51440 | 10 |
| -5 | -12 | 9  | 78.0322 | 6.97786 | 13 |
| 5  | -12 | -9 | 78.0947 | 7.92098 | 13 |
| -5 | 12  | 9  | 73.7832 | 6.79035 | 10 |
| 5  | 12  | -9 | 80.9456 | 7.80749 | 10 |
| 4  | -12 | -9 | 17.9272 | 3.41541 | 13 |
| -4 | -12 | 9  | 16.4025 | 3.88372 | 13 |
| -4 | 12  | 9  | 17.5021 | 3.89120 | 10 |
| 4  | 12  | -9 | 18.3064 | 4.18677 | 10 |
| 3  | -12 | -9 | 127.393 | 10.4007 | 13 |
| -3 | -12 | 9  | 123.143 | 10.5544 | 13 |
| 3  | 12  | -9 | 142.036 | 10.4294 | 10 |
| -3 | 12  | 9  | 140.430 | 11.0473 | 10 |
| -2 | -12 | 9  | 8.22660 | 3.12851 | 13 |
| 2  | -12 | -9 | 13.9258 | 3.55023 | 13 |
| 2  | -12 | -9 | 12.9458 | 4.93576 | 2  |
| -2 | 12  | 9  | 19.3306 | 4.62631 | 10 |
| 1  | -12 | -9 | 19.2303 | 3.75500 | 13 |
| 1  | 12  | -9 | 28.8456 | 4.44964 | 14 |

|    |     |    |         |         |    |
|----|-----|----|---------|---------|----|
| 0  | -12 | -9 | 18.4815 | 3.53978 | 13 |
| 0  | 12  | -9 | 15.0943 | 3.02725 | 14 |
| 0  | 12  | -9 | 17.4046 | 2.35457 | 11 |
| 0  | 12  | 9  | 26.1862 | 4.89253 | 10 |
| -1 | -12 | -9 | 188.345 | 15.6132 | 1  |
| -1 | 12  | -9 | 155.210 | 10.0294 | 11 |
| -1 | 12  | -9 | 150.200 | 11.3346 | 14 |
| -1 | 12  | -9 | 149.190 | 9.90380 | 11 |
| -2 | -12 | -9 | 215.035 | 17.6323 | 1  |
| -2 | -12 | -9 | 208.576 | 14.4135 | 10 |
| -2 | 12  | -9 | 173.941 | 13.3376 | 12 |
| -2 | 12  | -9 | 193.478 | 13.7108 | 14 |
| -3 | -12 | -9 | 89.6820 | 10.2022 | 1  |
| -3 | -12 | -9 | 78.3045 | 8.15649 | 10 |
| -3 | 12  | -9 | 95.2763 | 6.21302 | 9  |
| -3 | 12  | -9 | 98.5998 | 8.15469 | 14 |
| -3 | 12  | -9 | 97.2889 | 5.90919 | 6  |
| -4 | -12 | -9 | 1.87823 | 2.53759 | 10 |
| -4 | 12  | -9 | 2.02294 | 0.99055 | 9  |
| -4 | 12  | -9 | 2.55770 | 2.49635 | 12 |
| -4 | 12  | -9 | 3.04732 | 3.10089 | 14 |
| -4 | 12  | -9 | 3.00219 | 0.58383 | 6  |
| 4  | 12  | 9  | 2.61373 | 2.89786 | 13 |
| -5 | -12 | -9 | 89.8113 | 6.98696 | 10 |
| -5 | 12  | -9 | 86.5688 | 7.00588 | 12 |
| 5  | 12  | 9  | 84.6816 | 7.23424 | 13 |
| -6 | 12  | -9 | 62.5947 | 5.02302 | 12 |
| -8 | -13 | 9  | 2.44918 | 2.25380 | 10 |
| 8  | -13 | -9 | 7.31285 | 2.14624 | 13 |
| 7  | -13 | -9 | 8.79229 | 2.70634 | 13 |
| 7  | 13  | -9 | 12.7146 | 3.81315 | 10 |
| 6  | -13 | -9 | 32.7604 | 6.26949 | 13 |
| 6  | 13  | -9 | 34.3124 | 5.85489 | 10 |
| -6 | 13  | 9  | 33.2295 | 2.94216 | 11 |
| -5 | -13 | 9  | 151.146 | 11.2322 | 13 |
| 5  | -13 | -9 | 156.837 | 11.5663 | 13 |
| 5  | 13  | -9 | 153.461 | 11.6758 | 10 |
| -5 | 13  | 9  | 153.679 | 11.0735 | 10 |
| 4  | -13 | -9 | 9.13361 | 3.40168 | 13 |
| -4 | -13 | 9  | 5.32094 | 2.79929 | 13 |
| -4 | 13  | 9  | 7.76050 | 2.70626 | 10 |
| -3 | -13 | 9  | 15.7061 | 3.33855 | 13 |
| 3  | -13 | -9 | 16.3938 | 3.24053 | 13 |
| 3  | 13  | -9 | 19.4027 | 3.49896 | 10 |
| -3 | 13  | 9  | 17.2742 | 3.62455 | 10 |
| -2 | -13 | 9  | 18.3811 | 3.87054 | 13 |
| 2  | -13 | -9 | 9.38731 | 3.17651 | 13 |
| -2 | 13  | 9  | 9.68358 | 3.42069 | 10 |
| -1 | -13 | 9  | 8.69343 | 3.44246 | 13 |
| 1  | -13 | -9 | 11.1567 | 3.28347 | 13 |

|    |     |    |         |         |    |
|----|-----|----|---------|---------|----|
| -1 | 13  | 9  | 11.6684 | 3.86451 | 10 |
| 1  | 13  | -9 | 16.7548 | 3.04517 | 14 |
| 1  | 13  | -9 | 12.1759 | 2.76868 | 10 |
| 0  | -13 | -9 | 11.8502 | 3.06518 | 13 |
| 0  | 13  | 9  | 11.2632 | 4.18805 | 10 |
| 0  | 13  | -9 | 20.7544 | 2.82307 | 11 |
| -1 | -13 | -9 | 1.93019 | 3.92425 | 1  |
| 1  | 13  | 9  | 4.20287 | 3.59340 | 10 |
| -2 | -13 | -9 | 147.328 | 11.0594 | 10 |
| -2 | -13 | -9 | 151.882 | 14.1697 | 1  |
| -2 | 13  | -9 | 125.727 | 9.92836 | 12 |
| -2 | 13  | -9 | 134.563 | 8.94858 | 9  |
| -2 | 13  | -9 | 130.895 | 10.6728 | 14 |
| -3 | -13 | -9 | 25.9341 | 4.17752 | 10 |
| -3 | 13  | -9 | 33.0696 | 5.21804 | 14 |
| -3 | 13  | -9 | 30.0062 | 2.17126 | 6  |
| -3 | 13  | -9 | 33.3922 | 2.83777 | 9  |
| -3 | 13  | -9 | 30.2826 | 4.52004 | 12 |
| -4 | -13 | -9 | 21.9583 | 3.57341 | 10 |
| -4 | 13  | -9 | 24.6528 | 1.68529 | 6  |
| -4 | 13  | -9 | 22.0729 | 1.65585 | 6  |
| -4 | 13  | -9 | 22.6679 | 3.59782 | 12 |
| -4 | 13  | -9 | 24.4664 | 2.16603 | 9  |
| -4 | 13  | -9 | 26.5135 | 3.63688 | 14 |
| -5 | -13 | -9 | 42.9806 | 4.44979 | 10 |
| -5 | 13  | -9 | 42.3248 | 4.55675 | 12 |
| 8  | -14 | -9 | 24.6947 | 3.97466 | 13 |
| -8 | -14 | 9  | 25.2757 | 3.79678 | 10 |
| 7  | -14 | -9 | 34.1354 | 4.62897 | 13 |
| 7  | 14  | -9 | 43.6979 | 5.04549 | 10 |
| 6  | -14 | -9 | 1.77604 | 2.70092 | 13 |
| -6 | 14  | 9  | 2.28526 | 1.09501 | 11 |
| 6  | 14  | -9 | 3.65589 | 3.44920 | 10 |
| -5 | -14 | 9  | 28.2221 | 4.69023 | 13 |
| -5 | 14  | 9  | 26.6170 | 3.62970 | 10 |
| 4  | -14 | -9 | 16.4041 | 3.29473 | 13 |
| -4 | -14 | 9  | 15.3492 | 3.25397 | 13 |
| 4  | 14  | -9 | 17.0641 | 3.62344 | 10 |
| -4 | 14  | 9  | 14.7455 | 3.10822 | 10 |
| 3  | -14 | -9 | 76.7839 | 7.01064 | 13 |
| -3 | -14 | 9  | 74.6232 | 7.18249 | 13 |
| 3  | 14  | -9 | 82.0468 | 7.26478 | 10 |
| -3 | 14  | 9  | 81.9262 | 7.45919 | 10 |
| 2  | -14 | -9 | 109.347 | 8.34348 | 13 |
| -2 | -14 | 9  | 98.3775 | 9.05288 | 13 |
| 2  | 14  | -9 | 93.8560 | 8.30383 | 10 |
| -2 | 14  | 9  | 112.265 | 9.30611 | 10 |
| 1  | -14 | -9 | 18.8637 | 3.34822 | 13 |
| -1 | -14 | 9  | 22.7622 | 4.27044 | 13 |
| 1  | 14  | -9 | 24.8169 | 3.27830 | 10 |

|    |     |    |         |         |    |
|----|-----|----|---------|---------|----|
| 1  | 14  | -9 | 28.1003 | 4.47759 | 14 |
| -1 | 14  | 9  | 24.5028 | 4.44595 | 10 |
| 0  | -14 | -9 | 193.889 | 13.0575 | 13 |
| 0  | 14  | -9 | 176.883 | 13.1281 | 14 |
| 0  | 14  | -9 | 190.162 | 12.0485 | 11 |
| 0  | 14  | 9  | 188.515 | 14.5001 | 10 |
| -1 | -14 | -9 | 95.8028 | 11.9298 | 1  |
| -1 | 14  | -9 | 107.170 | 8.37920 | 14 |
| 1  | 14  | 9  | 75.8843 | 8.99831 | 10 |
| -2 | -14 | -9 | 2.50530 | 3.09863 | 10 |
| -2 | -14 | -9 | 0.72236 | 4.48993 | 1  |
| -2 | 14  | -9 | 5.30313 | 1.27821 | 9  |
| -2 | 14  | -9 | 8.95885 | 2.86372 | 14 |
| -2 | 14  | -9 | 5.11700 | 0.82457 | 6  |
| -2 | 14  | -9 | 4.55729 | 2.44872 | 12 |
| -3 | -14 | -9 | 63.7205 | 7.16326 | 10 |
| -3 | 14  | -9 | 82.4782 | 7.19112 | 14 |
| -3 | 14  | -9 | 77.3619 | 6.57444 | 12 |
| -4 | -14 | -9 | 8.87807 | 2.87103 | 10 |
| -4 | 14  | -9 | 4.79719 | 2.65775 | 14 |
| -4 | 14  | -9 | 9.26666 | 0.77615 | 6  |
| -4 | 14  | -9 | 5.64696 | 2.62341 | 12 |
| -4 | 14  | -9 | 7.12182 | 1.01657 | 9  |
| -4 | 14  | -9 | 7.25292 | 0.68298 | 6  |
| -5 | -14 | -9 | 37.4861 | 4.09368 | 10 |
| -5 | 14  | -9 | 38.8802 | 3.64865 | 12 |
| 7  | -15 | -9 | 26.0620 | 3.94038 | 13 |
| 7  | 15  | -9 | 36.4172 | 5.07722 | 10 |
| -6 | 15  | 9  | 18.6247 | 1.92721 | 11 |
| 6  | 15  | -9 | 19.6627 | 3.69509 | 10 |
| -5 | -15 | 9  | 38.7750 | 5.61905 | 13 |
| 5  | -15 | -9 | 29.6513 | 4.20527 | 13 |
| 5  | 15  | -9 | 36.4141 | 5.51989 | 10 |
| -5 | 15  | 9  | 23.8342 | 2.88974 | 11 |
| 4  | -15 | -9 | 52.9536 | 7.10271 | 13 |
| -4 | -15 | 9  | 65.3763 | 6.60660 | 13 |
| -4 | 15  | 9  | 61.1503 | 6.32207 | 10 |
| 4  | 15  | -9 | 64.9163 | 6.57748 | 10 |
| 3  | -15 | -9 | 74.5254 | 7.04555 | 13 |
| -3 | -15 | 9  | 82.2491 | 7.75160 | 13 |
| 3  | 15  | -9 | 79.7381 | 7.51401 | 10 |
| -3 | 15  | 9  | 78.1240 | 7.35670 | 10 |
| 2  | -15 | -9 | 28.4143 | 5.00597 | 13 |
| -2 | -15 | 9  | 15.4010 | 3.78708 | 13 |
| 2  | 15  | -9 | 16.5332 | 3.04141 | 10 |
| -2 | 15  | 9  | 28.5326 | 4.98664 | 10 |
| -1 | -15 | 9  | 21.8858 | 3.81462 | 13 |
| 1  | -15 | -9 | 13.9785 | 3.42067 | 13 |
| -1 | 15  | 9  | 11.4522 | 3.78447 | 10 |
| 1  | 15  | -9 | 20.5225 | 3.29689 | 14 |

|    |     |    |         |         |    |
|----|-----|----|---------|---------|----|
| 1  | 15  | -9 | 26.2010 | 3.69235 | 11 |
| 0  | -15 | -9 | 75.8733 | 6.74286 | 13 |
| 0  | 15  | -9 | 73.9192 | 5.47875 | 11 |
| 0  | 15  | -9 | 71.1813 | 5.23730 | 11 |
| 0  | 15  | 9  | 76.7389 | 8.12890 | 10 |
| 0  | 15  | -9 | 76.1239 | 7.38895 | 14 |
| -1 | -15 | -9 | 110.252 | 12.1414 | 1  |
| 1  | 15  | 9  | 102.340 | 9.49205 | 10 |
| -1 | 15  | -9 | 116.184 | 8.94794 | 14 |
| -2 | -15 | -9 | 4.14311 | 3.35191 | 10 |
| -2 | 15  | -9 | 5.75012 | 1.29768 | 9  |
| -2 | 15  | -9 | 4.49447 | 2.98390 | 14 |
| 2  | 15  | 9  | 5.74344 | 4.02632 | 10 |
| -2 | 15  | -9 | 8.70712 | 0.93684 | 6  |
| -3 | -15 | -9 | 5.93880 | 3.06648 | 10 |
| -3 | 15  | -9 | 3.37056 | 1.02155 | 9  |
| -3 | 15  | -9 | 4.05147 | 2.44463 | 12 |
| -3 | 15  | -9 | 4.01948 | 0.64812 | 6  |
| -3 | 15  | -9 | 4.71505 | 2.71354 | 14 |
| -4 | -15 | -9 | -0.3077 | 2.46515 | 10 |
| -4 | 15  | -9 | 2.27359 | 2.31393 | 12 |
| -4 | 15  | -9 | 3.20109 | 2.47328 | 14 |
| -4 | 15  | -9 | 0.88920 | 0.56320 | 9  |
| -4 | 15  | -9 | 1.92732 | 0.60865 | 9  |
| -5 | -15 | -9 | 53.3473 | 4.74111 | 10 |
| -5 | 15  | -9 | 51.5415 | 4.68359 | 12 |
| 7  | -16 | -9 | 18.3843 | 3.19639 | 13 |
| 7  | 16  | -9 | 17.3292 | 3.32921 | 10 |
| 6  | -16 | -9 | 5.64826 | 3.12917 | 13 |
| 6  | 16  | -9 | 0.45356 | 3.13792 | 10 |
| -5 | -16 | 9  | 135.665 | 10.1998 | 13 |
| 5  | -16 | -9 | 148.153 | 10.8392 | 13 |
| 5  | 16  | -9 | 124.626 | 10.1820 | 10 |
| -5 | 16  | 9  | 126.392 | 8.64082 | 11 |
| 4  | -16 | -9 | 108.756 | 9.22352 | 13 |
| -4 | -16 | 9  | 105.794 | 9.02923 | 13 |
| 4  | 16  | -9 | 114.419 | 9.30861 | 10 |
| -4 | 16  | 9  | 107.983 | 8.74158 | 10 |
| 3  | -16 | -9 | 70.5574 | 6.52607 | 13 |
| -3 | -16 | 9  | 59.9630 | 6.51549 | 13 |
| -3 | 16  | 9  | 69.7096 | 6.49805 | 10 |
| 3  | 16  | -9 | 56.0799 | 6.19436 | 10 |
| 2  | -16 | -9 | 12.3409 | 3.30543 | 13 |
| -2 | -16 | 9  | 5.87517 | 3.18267 | 13 |
| 2  | 16  | -9 | 4.04048 | 2.63696 | 10 |
| -2 | 16  | 9  | 9.53138 | 3.36146 | 10 |
| 1  | -16 | -9 | 75.9324 | 7.07052 | 13 |
| -1 | -16 | 9  | 60.0775 | 6.49620 | 13 |
| 1  | 16  | -9 | 69.7666 | 6.70042 | 14 |
| 1  | 16  | -9 | 67.1891 | 5.37502 | 11 |



|    |     |    |         |         |    |
|----|-----|----|---------|---------|----|
| -1 | 16  | 9  | 81.0604 | 7.73117 | 10 |
| 0  | -16 | -9 | 91.2971 | 7.81006 | 13 |
| 0  | 16  | -9 | 90.4108 | 8.05996 | 14 |
| 0  | 16  | -9 | 100.086 | 6.24564 | 11 |
| 0  | 16  | 9  | 104.240 | 9.30393 | 10 |
| 0  | 16  | -9 | 90.7493 | 6.13184 | 11 |
| -1 | 16  | -9 | 134.435 | 11.0972 | 14 |
| 1  | 16  | 9  | 160.059 | 11.9299 | 10 |
| 2  | 16  | 9  | 46.1424 | 6.96210 | 10 |
| -2 | 16  | -9 | 44.8501 | 3.06360 | 6  |
| -3 | -16 | -9 | 0.87894 | 3.10905 | 10 |
| -3 | 16  | -9 | 3.72470 | 3.03355 | 14 |
| -3 | 16  | -9 | 0.85688 | 0.53123 | 6  |
| -3 | 16  | -9 | 1.77669 | 0.86699 | 9  |
| -3 | 16  | -9 | 0.57050 | 2.40258 | 12 |
| -3 | 16  | -9 | 1.35546 | 0.43788 | 6  |
| -4 | -16 | -9 | 13.8749 | 2.75576 | 10 |
| -4 | 16  | -9 | 14.6548 | 2.58253 | 12 |
| -4 | 16  | -9 | 15.2221 | 2.70738 | 14 |
| -5 | 16  | -9 | 2.27903 | 1.75442 | 12 |
| 7  | -17 | -9 | 4.44579 | 2.06483 | 13 |
| 7  | 17  | -9 | 0.12019 | 2.55209 | 10 |
| 6  | -17 | -9 | 2.32697 | 2.31841 | 13 |
| 6  | 17  | -9 | -0.3649 | 3.02899 | 10 |
| -5 | -17 | 9  | 56.9763 | 6.41417 | 13 |
| 5  | -17 | -9 | 84.8283 | 7.05543 | 13 |
| 5  | 17  | -9 | 65.4342 | 7.28886 | 10 |
| -5 | 17  | 9  | 81.0783 | 5.08910 | 11 |
| 4  | -17 | -9 | 16.5068 | 3.49890 | 13 |
| -4 | -17 | 9  | 15.3815 | 3.45406 | 13 |
| 4  | 17  | -9 | 18.4313 | 3.94690 | 10 |
| -4 | 17  | 9  | 14.9324 | 2.72862 | 10 |
| -3 | -17 | 9  | 7.83757 | 2.98611 | 13 |
| 3  | -17 | -9 | 1.71182 | 3.22520 | 13 |
| 3  | 17  | -9 | 1.31830 | 2.60697 | 10 |
| -3 | 17  | 9  | 0.83777 | 2.96771 | 10 |
| -2 | -17 | 9  | 46.4272 | 6.77416 | 13 |
| 2  | 17  | -9 | 57.8944 | 5.70057 | 10 |
| -2 | 17  | 9  | 50.0011 | 6.45194 | 10 |
| -1 | -17 | 9  | 31.2590 | 5.16781 | 13 |
| 1  | -17 | -9 | 37.7277 | 5.20319 | 13 |
| -1 | 17  | 9  | 35.8465 | 6.02039 | 10 |
| 1  | 17  | -9 | 35.3774 | 5.40207 | 14 |
| 1  | 17  | -9 | 39.3414 | 3.82987 | 11 |
| 0  | -17 | -9 | 6.80034 | 3.23106 | 13 |
| 0  | 17  | -9 | 5.31763 | 3.04843 | 14 |
| 0  | 17  | 9  | 1.30315 | 3.58415 | 10 |
| 1  | 17  | 9  | 50.0580 | 7.30307 | 10 |
| -1 | 17  | -9 | 71.6260 | 6.66923 | 14 |
| -2 | 17  | -9 | 6.51618 | 0.85247 | 6  |

|    |     |    |         |         |    |
|----|-----|----|---------|---------|----|
| -2 | 17  | -9 | 5.38327 | 1.30801 | 9  |
| -2 | 17  | -9 | 8.34997 | 2.98854 | 14 |
| 2  | 17  | 9  | 8.37033 | 3.96587 | 10 |
| -3 | -17 | -9 | 2.48000 | 1.95771 | 10 |
| -3 | 17  | -9 | 2.44300 | 2.11224 | 12 |
| -3 | 17  | -9 | 2.36248 | 0.40719 | 6  |
| -3 | 17  | -9 | 3.17380 | 0.88218 | 9  |
| -3 | 17  | -9 | 1.88638 | 2.64741 | 14 |
| -3 | 17  | -9 | 2.80008 | 0.43816 | 6  |
| -4 | -17 | -9 | -0.9470 | 2.01549 | 10 |
| -4 | 17  | -9 | 0.29179 | 1.77678 | 12 |
| 6  | -18 | -9 | 8.34743 | 2.57964 | 13 |
| 6  | 18  | -9 | 6.21429 | 2.86669 | 10 |
| 5  | -18 | -9 | 1.54525 | 2.38468 | 13 |
| -5 | -18 | 9  | 0.33831 | 2.09888 | 13 |
| -5 | 18  | 9  | 0.26906 | 0.60126 | 11 |
| -5 | 18  | 9  | -0.0408 | 0.59107 | 11 |
| 5  | 18  | -9 | 0.06749 | 2.83283 | 10 |
| -4 | -18 | 9  | 16.9309 | 3.16477 | 13 |
| 4  | 18  | -9 | 10.3688 | 3.14239 | 10 |
| 3  | -18 | -9 | 2.07972 | 2.83302 | 13 |
| -3 | -18 | 9  | -0.0435 | 2.54908 | 13 |
| -3 | 18  | 9  | 0.26251 | 2.18300 | 10 |
| 3  | 18  | -9 | -2.5665 | 2.39532 | 10 |
| 2  | -18 | -9 | 16.4766 | 3.12843 | 13 |
| -2 | -18 | 9  | 12.2953 | 3.01089 | 13 |
| -2 | 18  | 9  | 10.7322 | 3.38618 | 10 |
| 2  | 18  | -9 | 11.6286 | 2.47991 | 11 |
| -1 | -18 | 9  | 108.117 | 9.21521 | 13 |
| 1  | -18 | -9 | 113.168 | 8.78645 | 13 |
| -1 | 18  | 9  | 110.788 | 9.49276 | 10 |
| 1  | 18  | -9 | 105.019 | 7.53630 | 11 |
| 1  | 18  | -9 | 111.525 | 8.81111 | 14 |
| 1  | 18  | -9 | 113.383 | 7.41166 | 11 |
| 0  | -18 | -9 | 34.3580 | 4.96158 | 13 |
| 0  | 18  | 9  | 36.7461 | 5.60163 | 10 |
| 0  | 18  | -9 | 38.4488 | 5.50312 | 14 |
| 1  | 18  | 9  | 9.62647 | 3.87066 | 10 |
| -1 | 18  | -9 | 11.8233 | 3.23520 | 14 |
| -2 | 18  | -9 | 77.5508 | 6.44865 | 14 |
| 2  | 18  | 9  | 73.8983 | 7.90978 | 10 |
| -2 | 18  | -9 | 77.0427 | 5.22749 | 9  |
| -2 | 18  | -9 | 75.5124 | 4.85628 | 6  |
| -3 | -18 | -9 | 18.2252 | 2.94380 | 10 |
| -3 | 18  | -9 | 12.4665 | 1.28742 | 9  |
| -3 | 18  | -9 | 13.7372 | 2.82052 | 14 |
| 3  | 18  | 9  | 13.8667 | 3.05789 | 10 |
| -3 | 18  | -9 | 11.2741 | 2.70717 | 12 |
| -3 | 18  | -9 | 11.5672 | 1.33749 | 9  |
| -4 | 18  | -9 | 31.6736 | 3.76011 | 12 |

|    |     |    |         |         |    |
|----|-----|----|---------|---------|----|
| 6  | -19 | -9 | 10.1067 | 2.09092 | 13 |
| 6  | 19  | -9 | 13.6612 | 2.92293 | 10 |
| -5 | -19 | 9  | 24.4953 | 3.59919 | 13 |
| 5  | 19  | -9 | 20.7068 | 4.00249 | 10 |
| 4  | -19 | -9 | 8.21522 | 3.04622 | 13 |
| -4 | 19  | 9  | 11.0872 | 1.39954 | 11 |
| 3  | -19 | -9 | 12.9801 | 3.18774 | 13 |
| -3 | -19 | 9  | 14.7705 | 3.07269 | 13 |
| 3  | 19  | -9 | 15.6226 | 3.09038 | 10 |
| -3 | 19  | 9  | 16.1098 | 2.99680 | 10 |
| 2  | -19 | -9 | 9.81613 | 2.77040 | 13 |
| -2 | -19 | 9  | 4.65210 | 3.05374 | 13 |
| -2 | 19  | 9  | 9.99287 | 2.90079 | 10 |
| 2  | 19  | -9 | 6.62601 | 1.73932 | 11 |
| 1  | -19 | -9 | 20.7347 | 3.42102 | 13 |
| -1 | -19 | 9  | 20.8462 | 3.76372 | 13 |
| 1  | 19  | -9 | 23.4674 | 1.83298 | 11 |
| 1  | 19  | -9 | 23.0407 | 3.51404 | 14 |
| -1 | 19  | 9  | 22.3451 | 4.11008 | 10 |
| 1  | 19  | -9 | 21.7013 | 1.80474 | 11 |
| 0  | -19 | -9 | 6.95842 | 2.55278 | 13 |
| 0  | 19  | -9 | 7.22256 | 2.91105 | 14 |
| 0  | 19  | 9  | 8.25551 | 3.40758 | 10 |
| -1 | 19  | -9 | 15.6025 | 1.96669 | 9  |
| -1 | 19  | -9 | 14.3068 | 3.42415 | 14 |
| -2 | 19  | -9 | 44.3885 | 2.93480 | 6  |
| -2 | 19  | -9 | 41.1349 | 4.52023 | 14 |
| -2 | 19  | -9 | 44.8390 | 3.27863 | 9  |
| 2  | 19  | 9  | 50.2150 | 5.35070 | 10 |
| 3  | 19  | 9  | 6.81099 | 2.40876 | 10 |
| 6  | -20 | -9 | 1.31926 | 1.77428 | 13 |
| 5  | -20 | -9 | 6.10819 | 2.18377 | 13 |
| -5 | -20 | 9  | 7.13876 | 2.20321 | 13 |
| 5  | 20  | -9 | 8.52842 | 2.40448 | 10 |
| 4  | -20 | -9 | 27.4850 | 4.52672 | 13 |
| -4 | -20 | 9  | 20.2158 | 3.33055 | 13 |
| -4 | 20  | 9  | 27.1841 | 2.10369 | 11 |
| 4  | 20  | -9 | 20.4177 | 3.51995 | 10 |
| -4 | 20  | 9  | 28.1740 | 2.07534 | 11 |
| 3  | -20 | -9 | 18.1486 | 3.70614 | 13 |
| -3 | -20 | 9  | 24.0657 | 4.29670 | 13 |
| 3  | 20  | -9 | 16.1211 | 2.49684 | 11 |
| -3 | 20  | 9  | 21.4563 | 2.62916 | 11 |
| -2 | -20 | 9  | 0.66421 | 2.43752 | 13 |
| 2  | -20 | -9 | 1.03881 | 2.58235 | 13 |
| -2 | 20  | 9  | 2.72081 | 2.42560 | 10 |
| 2  | 20  | -9 | 2.33526 | 1.44535 | 11 |
| 1  | -20 | -9 | 2.78874 | 2.64144 | 13 |
| -1 | 20  | 9  | 3.65095 | 3.07249 | 10 |
| 0  | -20 | -9 | 9.87319 | 2.63511 | 13 |

|    |     |    |         |         |    |
|----|-----|----|---------|---------|----|
| 0  | 20  | 9  | 6.92021 | 2.53804 | 10 |
| -1 | 20  | -9 | 27.8459 | 1.94778 | 6  |
| -1 | 20  | -9 | 28.7016 | 4.54039 | 14 |
| -1 | 20  | -9 | 23.9171 | 2.42546 | 9  |
| 1  | 20  | 9  | 27.9613 | 4.86862 | 10 |
| 2  | 20  | 9  | 8.84401 | 2.67307 | 10 |
| -2 | 20  | -9 | 13.7854 | 1.45830 | 9  |
| 5  | -21 | -9 | 10.2878 | 2.06147 | 13 |
| 5  | 21  | -9 | 5.20504 | 2.20074 | 10 |
| 4  | -21 | -9 | 0.97793 | 2.04859 | 13 |
| -4 | -21 | 9  | 1.96349 | 1.91225 | 13 |
| 4  | 21  | -9 | 0.30375 | 1.68385 | 11 |
| 4  | 21  | -9 | 1.91516 | 1.53482 | 10 |
| 3  | -21 | -9 | 13.2044 | 2.79089 | 13 |
| -3 | -21 | 9  | 11.1936 | 2.58962 | 13 |
| -3 | 21  | 9  | 13.8029 | 1.68469 | 11 |
| 3  | 21  | -9 | 11.4032 | 2.03966 | 11 |
| 2  | -21 | -9 | 13.6802 | 2.85296 | 13 |
| -2 | -21 | 9  | 11.7924 | 2.59994 | 13 |
| -2 | 21  | 9  | 11.7354 | 2.38090 | 10 |
| 1  | -21 | -9 | 11.2518 | 2.66143 | 13 |
| -1 | -21 | 9  | 14.3761 | 2.59548 | 13 |
| -1 | 21  | 9  | 11.4322 | 2.89995 | 10 |
| 0  | -21 | -9 | 4.98659 | 2.26184 | 13 |
| 0  | 21  | 9  | 4.30721 | 2.83161 | 10 |
| -1 | 21  | -9 | 10.9021 | 1.32570 | 9  |
| 1  | 21  | 9  | 9.20111 | 2.52799 | 10 |
| 2  | 21  | 9  | 5.94835 | 2.13294 | 10 |
| 4  | -22 | -9 | 13.8672 | 2.35179 | 13 |
| -4 | -22 | 9  | 14.7361 | 2.79216 | 13 |
| 4  | 22  | -9 | 12.7576 | 1.71838 | 11 |
| -3 | -22 | 9  | 1.91119 | 1.90926 | 13 |
| 3  | -22 | -9 | 2.47926 | 2.53545 | 13 |
| -3 | 22  | 9  | 2.25766 | 0.71516 | 11 |
| -3 | 22  | 9  | 2.44556 | 0.66985 | 11 |
| 2  | -22 | -9 | 4.83797 | 2.21121 | 13 |
| -2 | -22 | 9  | 3.80333 | 2.04709 | 13 |
| -2 | 22  | 9  | 3.00282 | 1.26198 | 11 |
| 1  | -22 | -9 | 5.96340 | 2.22416 | 13 |
| -1 | -22 | 9  | 5.80970 | 1.99178 | 13 |
| -1 | 22  | 9  | 5.94674 | 2.03397 | 10 |
| 0  | 22  | 9  | 2.69775 | 2.26221 | 10 |
| 1  | 22  | 9  | 8.35966 | 2.58671 | 10 |
| -3 | -23 | 9  | 15.3269 | 2.35536 | 13 |
| 3  | -23 | -9 | 17.5424 | 3.13162 | 13 |
| 2  | -23 | -9 | 4.54201 | 2.01763 | 13 |
| -2 | -23 | 9  | 3.53100 | 1.81241 | 13 |
| -2 | 23  | 9  | 4.77123 | 1.00909 | 11 |
| -1 | -23 | 9  | -0.2062 | 1.44541 | 13 |
| 1  | -23 | -9 | 2.34825 | 1.75962 | 13 |

|    |    |     |         |         |    |
|----|----|-----|---------|---------|----|
| -1 | 23 | 9   | 2.11086 | 2.11456 | 10 |
| 0  | 23 | 9   | 3.88074 | 1.75277 | 10 |
| -9 | 0  | 10  | 18.1355 | 2.76242 | 10 |
| 9  | 0  | -10 | 16.6929 | 3.34874 | 13 |
| 9  | 0  | -10 | 19.9557 | 3.49277 | 13 |
| -8 | 0  | 10  | 24.7507 | 4.06813 | 10 |
| 8  | 0  | -10 | 25.6693 | 4.38144 | 13 |
| 7  | 0  | -10 | 33.9154 | 5.71618 | 13 |
| -7 | 0  | 10  | 28.4821 | 4.82831 | 10 |
| 6  | 0  | -10 | 7.59852 | 3.04761 | 13 |
| -6 | 0  | 10  | 8.84127 | 3.03162 | 10 |
| -5 | 0  | 10  | 34.1345 | 5.21449 | 10 |
| 5  | 0  | -10 | 31.4036 | 5.70713 | 13 |
| 0  | 0  | -10 | 1107.35 | 67.9296 | 8  |
| -1 | 0  | -10 | 7.64316 | 1.90816 | 8  |
| -1 | 0  | -10 | 7.05646 | 2.48319 | 10 |
| -1 | 0  | -10 | 6.79757 | 3.10081 | 1  |
| 2  | 0  | 10  | 29.1243 | 4.88008 | 13 |
| -2 | 0  | -10 | 32.0865 | 3.87131 | 8  |
| -2 | 0  | -10 | 25.2214 | 4.54826 | 10 |
| 3  | 0  | 10  | 3.62055 | 2.76012 | 13 |
| -3 | 0  | -10 | 4.26770 | 1.75588 | 8  |
| -3 | 0  | -10 | 5.19957 | 2.25864 | 10 |
| -4 | 0  | -10 | 45.1347 | 5.28101 | 12 |
| -4 | 0  | -10 | 54.9705 | 4.83881 | 8  |
| 4  | 0  | 10  | 51.3243 | 6.24035 | 13 |
| 5  | 0  | 10  | 1.37168 | 3.17659 | 13 |
| -5 | 0  | -10 | 2.30459 | 2.04821 | 12 |
| -5 | 0  | -10 | 1.23262 | 1.24114 | 8  |
| 6  | 0  | 10  | 66.1342 | 6.12327 | 13 |
| 9  | -1 | -10 | 25.4050 | 4.29344 | 13 |
| -9 | -1 | 10  | 24.5769 | 3.25752 | 10 |
| 9  | 1  | -10 | 27.2906 | 4.67168 | 13 |
| 9  | 1  | -10 | 24.6001 | 4.42281 | 13 |
| -9 | 1  | 10  | 23.8980 | 3.09308 | 10 |
| -8 | -1 | 10  | 1.45201 | 2.38581 | 10 |
| 8  | -1 | -10 | -1.1258 | 2.98344 | 13 |
| -8 | 1  | 10  | 0.67261 | 2.11554 | 10 |
| 8  | 1  | -10 | -0.3279 | 3.13259 | 13 |
| -7 | -1 | 10  | 57.2643 | 6.01152 | 10 |
| 7  | -1 | -10 | 44.7148 | 6.51310 | 13 |
| -7 | 1  | 10  | 39.3163 | 5.52995 | 10 |
| -6 | -1 | 10  | 28.3718 | 4.77269 | 10 |
| 6  | -1 | -10 | 23.5465 | 4.34267 | 13 |
| -6 | 1  | 10  | 24.2181 | 4.40483 | 10 |
| 6  | 1  | -10 | 22.8895 | 3.83090 | 13 |
| -5 | -1 | 10  | 2.71667 | 2.65780 | 10 |
| -5 | 1  | 10  | 0.52604 | 2.58351 | 10 |
| 5  | 1  | -10 | 0.60567 | 3.19861 | 13 |
| 1  | 1  | -10 | 1096.46 | 67.3285 | 8  |

|    |    |     |         |         |    |
|----|----|-----|---------|---------|----|
| 0  | -1 | -10 | 150.467 | 9.22530 | 8  |
| 0  | 1  | -10 | 110.564 | 8.94153 | 8  |
| -1 | -1 | -10 | 143.543 | 12.1134 | 1  |
| -1 | -1 | -10 | 141.647 | 10.3834 | 8  |
| -1 | -1 | -10 | 146.077 | 10.9201 | 10 |
| -1 | 1  | -10 | 157.035 | 11.1047 | 10 |
| -1 | 1  | -10 | 160.559 | 11.9200 | 1  |
| -1 | 1  | -10 | 150.742 | 10.2099 | 8  |
| -2 | -1 | -10 | 116.348 | 7.74294 | 8  |
| -2 | -1 | -10 | 109.615 | 9.02915 | 1  |
| -2 | -1 | -10 | 110.915 | 8.35700 | 10 |
| 2  | -1 | 10  | 105.646 | 9.47367 | 13 |
| -2 | 1  | -10 | 97.6713 | 7.47259 | 8  |
| -2 | 1  | -10 | 89.3389 | 8.12480 | 10 |
| 2  | 1  | 10  | 96.1078 | 9.40983 | 13 |
| 3  | -1 | 10  | 16.6199 | 3.44755 | 13 |
| -3 | -1 | -10 | 16.3108 | 2.54005 | 8  |
| -3 | -1 | -10 | 15.9251 | 2.78929 | 10 |
| 3  | 1  | 10  | 15.2665 | 4.00006 | 13 |
| -3 | 1  | -10 | 19.5613 | 2.75075 | 8  |
| -3 | 1  | -10 | 18.7252 | 3.11999 | 10 |
| -4 | -1 | -10 | 111.532 | 8.85246 | 8  |
| 4  | -1 | 10  | 127.829 | 10.1152 | 13 |
| -4 | -1 | -10 | 107.077 | 9.29819 | 12 |
| -4 | 1  | -10 | 143.728 | 9.60703 | 12 |
| -4 | 1  | -10 | 145.448 | 8.96789 | 8  |
| -5 | -1 | -10 | 9.22911 | 1.28814 | 11 |
| -5 | -1 | -10 | 9.08361 | 2.31892 | 12 |
| -5 | -1 | -10 | 10.0999 | 1.75946 | 8  |
| 5  | -1 | 10  | 9.57830 | 2.84281 | 13 |
| -5 | 1  | -10 | 9.27710 | 1.71857 | 8  |
| -5 | 1  | -10 | 8.08419 | 2.36773 | 12 |
| 5  | 1  | 10  | 7.72640 | 2.98800 | 13 |
| 6  | -1 | 10  | 2.20641 | 2.69878 | 13 |
| -6 | -1 | -10 | 6.96012 | 1.57163 | 8  |
| 6  | 1  | 10  | 8.47494 | 3.07942 | 13 |
| -9 | -2 | 10  | 17.3110 | 3.15636 | 10 |
| 9  | -2 | -10 | 25.2047 | 3.75729 | 13 |
| -9 | 2  | 10  | 22.8636 | 2.84730 | 7  |
| 9  | 2  | -10 | 16.5962 | 3.71422 | 13 |
| -9 | 2  | 10  | 23.6695 | 2.36045 | 11 |
| 8  | -2 | -10 | 37.4967 | 5.85520 | 13 |
| 8  | 2  | -10 | 32.1058 | 5.79793 | 13 |
| -8 | 2  | 10  | 38.0900 | 4.33904 | 10 |
| 7  | -2 | -10 | 68.0154 | 8.09849 | 13 |
| -7 | -2 | 10  | 89.2216 | 7.96730 | 10 |
| -7 | 2  | 10  | 81.9545 | 7.53526 | 10 |
| 7  | 2  | -10 | 90.5915 | 8.26400 | 13 |
| 6  | -2 | -10 | 8.80576 | 3.01514 | 13 |
| -6 | -2 | 10  | 5.20419 | 2.68765 | 10 |

|    |    |     |         |         |    |
|----|----|-----|---------|---------|----|
| 6  | 2  | -10 | 6.11181 | 2.81291 | 13 |
| -6 | 2  | 10  | 5.55741 | 2.54641 | 10 |
| -5 | -2 | 10  | 34.1777 | 7.33964 | 1  |
| -4 | -2 | 10  | 6.76901 | 4.18685 | 1  |
| -4 | 2  | 10  | 1.07666 | 2.91609 | 10 |
| 1  | 2  | -10 | 8.68086 | 2.53128 | 8  |
| 0  | -2 | -10 | 25.2232 | 3.32292 | 8  |
| -1 | 2  | -10 | 37.7321 | 3.98806 | 8  |
| -1 | 2  | -10 | 40.1248 | 5.20082 | 1  |
| -1 | 2  | -10 | 52.0928 | 5.11786 | 10 |
| -2 | -2 | -10 | 25.5275 | 4.31743 | 10 |
| 2  | -2 | 10  | 33.5684 | 5.42318 | 13 |
| -2 | -2 | -10 | 31.0549 | 4.10809 | 8  |
| -2 | -2 | -10 | 23.2590 | 5.23385 | 1  |
| -2 | 2  | -10 | 34.9169 | 3.87450 | 10 |
| -2 | 2  | -10 | 39.8028 | 3.55246 | 8  |
| -3 | -2 | -10 | 13.8231 | 2.92167 | 10 |
| 3  | -2 | 10  | 17.8467 | 3.84410 | 13 |
| -3 | -2 | -10 | 12.1159 | 2.33240 | 8  |
| -3 | 2  | -10 | 12.7913 | 2.77382 | 14 |
| -3 | 2  | -10 | 11.2744 | 2.03838 | 8  |
| -3 | 2  | -10 | 9.67347 | 2.71986 | 12 |
| 3  | 2  | 10  | 11.9654 | 3.37653 | 13 |
| 4  | -2 | 10  | 29.6769 | 4.66717 | 13 |
| -4 | -2 | -10 | 26.4078 | 3.59017 | 8  |
| -4 | -2 | -10 | 21.4430 | 3.48662 | 12 |
| -4 | -2 | -10 | 22.5774 | 3.71150 | 10 |
| 4  | 2  | 10  | 36.2082 | 5.90867 | 13 |
| -5 | -2 | -10 | 30.5832 | 4.01625 | 12 |
| -5 | -2 | -10 | 29.7224 | 3.33325 | 8  |
| 5  | -2 | 10  | 31.4847 | 4.90809 | 13 |
| -5 | 2  | -10 | 37.9952 | 3.05086 | 8  |
| -5 | 2  | -10 | 34.8826 | 4.18640 | 12 |
| 5  | 2  | 10  | 32.1381 | 6.16254 | 13 |
| 6  | -2 | 10  | 8.41333 | 2.72482 | 13 |
| -6 | -2 | -10 | 5.52316 | 1.28422 | 8  |
| 6  | 2  | 10  | 5.90582 | 2.54665 | 13 |
| 9  | -3 | -10 | 1.20944 | 2.71896 | 13 |
| -9 | -3 | 10  | 0.18491 | 1.87003 | 10 |
| -9 | 3  | 10  | 2.37527 | 1.03575 | 11 |
| 9  | 3  | -10 | -2.0789 | 2.30019 | 13 |
| -9 | 3  | 10  | 0.18759 | 1.41742 | 7  |
| -8 | -3 | 10  | 12.7355 | 2.67913 | 10 |
| 8  | 3  | -10 | 11.1141 | 3.46411 | 13 |
| -8 | 3  | 10  | 13.3417 | 2.66264 | 10 |
| 8  | 3  | -10 | 12.7450 | 3.33529 | 13 |
| -7 | -3 | 10  | 43.6336 | 5.80632 | 10 |
| 7  | 3  | -10 | 34.8521 | 5.28922 | 13 |
| 6  | -3 | -10 | 21.4690 | 3.75124 | 13 |
| -6 | -3 | 10  | 19.4094 | 3.81524 | 10 |

|    |    |     |         |         |    |
|----|----|-----|---------|---------|----|
| -6 | -3 | 10  | 24.8576 | 6.69442 | 1  |
| 6  | 3  | -10 | 17.9921 | 3.54359 | 13 |
| -6 | 3  | 10  | 25.1221 | 4.21383 | 10 |
| -5 | -3 | 10  | 7.92246 | 3.01884 | 10 |
| -5 | -3 | 10  | 10.1552 | 4.65472 | 1  |
| -4 | -3 | 10  | 13.0800 | 4.86717 | 1  |
| -4 | 3  | 10  | 20.6683 | 4.05109 | 10 |
| 0  | 3  | -10 | 322.497 | 20.5320 | 8  |
| -1 | -3 | -10 | 12.2007 | 3.60239 | 10 |
| -1 | 3  | -10 | 15.3010 | 2.41309 | 8  |
| -1 | 3  | -10 | 19.4910 | 3.43277 | 10 |
| 2  | -3 | 10  | 1.61631 | 3.35338 | 13 |
| -2 | -3 | -10 | 7.49963 | 2.50165 | 10 |
| -2 | -3 | -10 | 9.15399 | 3.50323 | 1  |
| -2 | -3 | -10 | 7.70871 | 2.10823 | 8  |
| -2 | 3  | -10 | 3.73750 | 1.63763 | 10 |
| 2  | 3  | 10  | 8.04531 | 3.60812 | 13 |
| -3 | -3 | -10 | 3.21950 | 2.60038 | 10 |
| -3 | -3 | -10 | 1.15001 | 2.12994 | 8  |
| -3 | 3  | -10 | 1.11893 | 1.68853 | 8  |
| -3 | 3  | -10 | 0.84835 | 2.19664 | 14 |
| -3 | 3  | -10 | 1.61809 | 2.71213 | 12 |
| 3  | 3  | 10  | -0.3837 | 2.76521 | 13 |
| -4 | -3 | -10 | 198.287 | 12.7227 | 8  |
| -4 | -3 | -10 | 187.001 | 13.0033 | 12 |
| -4 | -3 | -10 | 185.253 | 12.8309 | 10 |
| 4  | 3  | 10  | 223.147 | 14.2048 | 13 |
| -4 | 3  | -10 | 173.404 | 12.1898 | 8  |
| -4 | 3  | -10 | 186.622 | 13.1675 | 12 |
| -4 | 3  | -10 | 174.044 | 11.6143 | 11 |
| -5 | 3  | -10 | 5.13181 | 2.24018 | 12 |
| -5 | 3  | -10 | 2.90678 | 1.25681 | 8  |
| 5  | 3  | 10  | 4.70866 | 3.76023 | 13 |
| -6 | -3 | -10 | 8.76571 | 1.55168 | 8  |
| 6  | 3  | 10  | 9.79723 | 2.71612 | 13 |
| -6 | 3  | -10 | 11.9621 | 2.01325 | 12 |
| -9 | -4 | 10  | 19.2701 | 3.13728 | 10 |
| 9  | -4 | -10 | 14.1983 | 3.23388 | 13 |
| -9 | 4  | 10  | 16.1538 | 1.65937 | 11 |
| 9  | 4  | -10 | 19.2790 | 4.14881 | 13 |
| 8  | -4 | -10 | -1.2226 | 2.93140 | 13 |
| 8  | 4  | -10 | 8.42842 | 3.34882 | 13 |
| -8 | 4  | 10  | 0.22048 | 1.87858 | 10 |
| 7  | -4 | -10 | 38.8346 | 5.68426 | 13 |
| -7 | -4 | 10  | 40.6597 | 5.78280 | 10 |
| -7 | 4  | 10  | 39.1988 | 4.94763 | 10 |
| -6 | -4 | 10  | 6.36687 | 4.22983 | 1  |
| 6  | -4 | -10 | 3.41460 | 2.76963 | 13 |
| -6 | -4 | 10  | 3.19118 | 2.69818 | 10 |
| -6 | 4  | 10  | 4.36041 | 2.46757 | 10 |



|    |    |     |         |         |    |
|----|----|-----|---------|---------|----|
| -5 | -4 | 10  | 3.63003 | 2.85941 | 10 |
| 5  | -4 | -10 | 2.93079 | 3.19485 | 13 |
| -5 | -4 | 10  | 3.97092 | 4.19986 | 1  |
| -5 | 4  | 10  | 5.83010 | 2.90688 | 10 |
| -4 | -4 | 10  | 57.2730 | 8.37450 | 1  |
| 4  | 4  | -10 | 38.5064 | 5.73666 | 10 |
| -4 | 4  | 10  | 45.2057 | 6.67931 | 10 |
| 1  | 4  | -10 | 154.945 | 10.5361 | 8  |
| 0  | 4  | -10 | 406.131 | 25.5717 | 8  |
| -1 | -4 | -10 | 102.104 | 8.49965 | 8  |
| -1 | -4 | -10 | 119.565 | 9.43661 | 10 |
| -1 | -4 | -10 | 112.849 | 10.9568 | 1  |
| -1 | 4  | -10 | 122.803 | 8.65770 | 10 |
| -1 | 4  | -10 | 133.789 | 8.53364 | 8  |
| -2 | -4 | -10 | 44.9291 | 5.13679 | 10 |
| -2 | -4 | -10 | 37.7156 | 4.29334 | 8  |
| -2 | -4 | -10 | 43.5129 | 6.64571 | 1  |
| 2  | 4  | 10  | 54.6938 | 6.58099 | 13 |
| -2 | 4  | -10 | 37.0642 | 3.77316 | 8  |
| -2 | 4  | -10 | 41.6581 | 5.69832 | 14 |
| -2 | 4  | -10 | 40.5151 | 4.83192 | 12 |
| -3 | -4 | -10 | 12.1502 | 2.40781 | 8  |
| -3 | -4 | -10 | 11.7319 | 2.73595 | 10 |
| 3  | 4  | 10  | 13.8856 | 3.98276 | 13 |
| -3 | 4  | -10 | 10.6885 | 1.85032 | 8  |
| -3 | 4  | -10 | 8.44279 | 2.54937 | 14 |
| -3 | 4  | -10 | 9.04283 | 2.59414 | 12 |
| -4 | -4 | -10 | 0.76140 | 1.84736 | 8  |
| -4 | -4 | -10 | 0.62345 | 1.91416 | 10 |
| -4 | -4 | -10 | -2.7897 | 2.07427 | 12 |
| 4  | 4  | 10  | 0.83833 | 3.21982 | 13 |
| -4 | 4  | -10 | 1.22141 | 3.01860 | 12 |
| -4 | 4  | -10 | 2.16643 | 1.18784 | 8  |
| -5 | -4 | -10 | -1.1487 | 1.68060 | 8  |
| 5  | 4  | 10  | -4.5925 | 3.15335 | 13 |
| -5 | 4  | -10 | 2.31081 | 2.28563 | 12 |
| -6 | -4 | -10 | 11.9023 | 2.07292 | 8  |
| -6 | 4  | -10 | 12.4240 | 2.31952 | 12 |
| 6  | 4  | 10  | 9.47466 | 2.72893 | 13 |
| 9  | -5 | -10 | 10.5849 | 3.36940 | 13 |
| -9 | -5 | 10  | 7.52298 | 2.31522 | 10 |
| -9 | 5  | 10  | 9.93971 | 1.08162 | 11 |
| 8  | -5 | -10 | 38.3025 | 5.76145 | 13 |
| -8 | 5  | 10  | 27.8791 | 3.47396 | 7  |
| -8 | 5  | 10  | 26.1639 | 3.76940 | 10 |
| -7 | -5 | 10  | 51.2713 | 6.37518 | 10 |
| 7  | -5 | -10 | 54.7481 | 6.75288 | 13 |
| -7 | -5 | 10  | 51.7646 | 9.34630 | 1  |
| -7 | 5  | 10  | 59.5545 | 5.76468 | 10 |
| -6 | -5 | 10  | 78.8425 | 9.83575 | 1  |

|    |    |     |         |         |    |
|----|----|-----|---------|---------|----|
| -6 | -5 | 10  | 71.8512 | 6.95686 | 10 |
| 6  | -5 | -10 | 56.3133 | 7.25706 | 13 |
| -6 | 5  | 10  | 54.9722 | 6.18631 | 10 |
| -5 | -5 | 10  | 5.59126 | 4.47825 | 1  |
| 5  | -5 | -10 | 11.7668 | 3.47551 | 13 |
| -5 | 5  | 10  | 7.18471 | 2.93964 | 10 |
| -4 | -5 | 10  | 73.4851 | 10.9782 | 1  |
| 4  | 5  | -10 | 54.3463 | 6.34449 | 10 |
| -4 | 5  | 10  | 58.5053 | 6.64329 | 10 |
| 0  | 5  | -10 | 17.2651 | 2.70552 | 8  |
| -1 | -5 | -10 | 40.9136 | 6.31650 | 1  |
| -1 | 5  | -10 | 25.9347 | 3.41636 | 10 |
| -1 | 5  | -10 | 26.2809 | 3.44828 | 8  |
| -2 | -5 | -10 | 47.9950 | 5.49271 | 10 |
| -2 | -5 | -10 | 48.5914 | 4.81440 | 8  |
| -2 | -5 | -10 | 45.1862 | 7.31097 | 1  |
| 2  | 5  | 10  | 46.3582 | 6.05482 | 13 |
| -2 | 5  | -10 | 56.6060 | 4.50432 | 8  |
| -2 | 5  | -10 | 55.2550 | 5.35029 | 12 |
| -3 | -5 | -10 | 5.76266 | 2.92430 | 1  |
| -3 | -5 | -10 | 6.54399 | 2.12137 | 8  |
| -3 | -5 | -10 | 4.65797 | 2.40536 | 10 |
| -3 | 5  | -10 | 0.44381 | 2.18171 | 12 |
| -3 | 5  | -10 | 1.04999 | 0.85014 | 11 |
| -3 | 5  | -10 | 0.38505 | 1.00469 | 11 |
| -3 | 5  | -10 | 0.96599 | 2.18648 | 14 |
| 3  | 5  | 10  | 2.71332 | 3.00925 | 13 |
| -3 | 5  | -10 | 0.54514 | 1.45243 | 8  |
| -4 | -5 | -10 | 123.854 | 8.86194 | 8  |
| -4 | -5 | -10 | 122.727 | 9.40349 | 10 |
| -4 | 5  | -10 | 119.372 | 8.16749 | 8  |
| 4  | 5  | 10  | 121.813 | 10.4748 | 13 |
| -4 | 5  | -10 | 126.573 | 9.38998 | 12 |
| -5 | -5 | -10 | 3.37073 | 1.85885 | 8  |
| -5 | 5  | -10 | 8.04631 | 1.93052 | 12 |
| 5  | 5  | 10  | 6.48148 | 3.44992 | 13 |
| 6  | 5  | 10  | 2.47135 | 2.36768 | 13 |
| -6 | 5  | -10 | 5.18138 | 1.72565 | 12 |
| 9  | -6 | -10 | 14.3229 | 3.00355 | 13 |
| -9 | -6 | 10  | 17.0738 | 3.07968 | 10 |
| -8 | -6 | 10  | 105.771 | 9.15350 | 10 |
| 8  | -6 | -10 | 127.535 | 9.80777 | 13 |
| -8 | 6  | 10  | 130.683 | 8.06365 | 11 |
| -7 | -6 | 10  | 69.2895 | 7.73312 | 10 |
| 7  | -6 | -10 | 89.5587 | 8.19662 | 13 |
| -7 | 6  | 10  | 94.6328 | 7.27572 | 10 |
| 6  | -6 | -10 | 26.1733 | 3.97409 | 13 |
| -6 | -6 | 10  | 22.5949 | 4.24387 | 10 |
| -6 | -6 | 10  | 22.0773 | 6.18463 | 1  |
| -6 | 6  | 10  | 22.6682 | 4.17118 | 10 |

|    |    |     |         |         |    |
|----|----|-----|---------|---------|----|
| -5 | -6 | 10  | -0.8895 | 3.76631 | 1  |
| 5  | -6 | -10 | 0.93186 | 2.38982 | 13 |
| 5  | 6  | -10 | 1.65159 | 2.87473 | 10 |
| -5 | 6  | 10  | 1.03826 | 2.46193 | 10 |
| 4  | -6 | -10 | 15.7841 | 3.24256 | 13 |
| 4  | 6  | -10 | 18.9166 | 3.70912 | 10 |
| -4 | 6  | 10  | 16.1810 | 3.79350 | 10 |
| 3  | 6  | -10 | 110.398 | 8.71423 | 10 |
| -3 | 6  | 10  | 93.7148 | 9.05226 | 10 |
| 0  | -6 | -10 | 97.5566 | 9.41180 | 10 |
| 0  | 6  | -10 | 132.456 | 9.12064 | 10 |
| 0  | 6  | -10 | 126.808 | 8.55070 | 8  |
| -1 | -6 | -10 | 81.5886 | 8.67085 | 1  |
| -1 | -6 | -10 | 80.0110 | 6.82179 | 10 |
| -1 | 6  | -10 | 62.7521 | 6.59042 | 14 |
| -1 | 6  | -10 | 58.7953 | 5.31693 | 10 |
| -1 | 6  | -10 | 59.9213 | 5.10687 | 8  |
| -1 | 6  | -10 | 57.1706 | 6.18660 | 12 |
| 1  | 6  | 10  | 72.8331 | 6.95260 | 13 |
| -2 | -6 | -10 | 18.7531 | 4.60342 | 1  |
| -2 | -6 | -10 | 17.1284 | 2.86539 | 8  |
| -2 | -6 | -10 | 20.4381 | 3.60660 | 10 |
| -2 | 6  | -10 | 21.0722 | 2.36843 | 11 |
| -2 | 6  | -10 | 24.9960 | 2.70043 | 8  |
| -2 | 6  | -10 | 19.7231 | 3.20437 | 14 |
| 2  | 6  | 10  | 20.9026 | 3.85576 | 13 |
| -2 | 6  | -10 | 19.7514 | 3.14247 | 12 |
| 3  | 6  | 10  | 56.8353 | 6.33804 | 13 |
| -3 | 6  | -10 | 42.0796 | 2.95497 | 11 |
| -3 | 6  | -10 | 39.9301 | 3.57089 | 8  |
| -3 | 6  | -10 | 42.6668 | 2.97526 | 11 |
| -3 | 6  | -10 | 41.8671 | 5.05408 | 12 |
| -3 | 6  | -10 | 41.1040 | 5.16751 | 14 |
| -4 | -6 | -10 | 18.5779 | 3.58857 | 10 |
| -4 | -6 | -10 | 16.8819 | 2.79534 | 8  |
| -4 | 6  | -10 | 24.0626 | 3.75974 | 12 |
| 4  | 6  | 10  | 20.3827 | 4.20897 | 13 |
| -5 | -6 | -10 | 7.98501 | 1.67988 | 8  |
| -5 | -6 | -10 | 5.73765 | 1.73574 | 10 |
| 5  | 6  | 10  | 5.84241 | 3.27868 | 13 |
| -5 | 6  | -10 | 2.52449 | 2.27798 | 12 |
| -5 | 6  | -10 | 4.99500 | 1.67913 | 9  |
| 6  | 6  | 10  | 3.53505 | 2.30514 | 13 |
| -6 | 6  | -10 | 3.41541 | 1.66343 | 12 |
| -9 | -7 | 10  | 47.6313 | 4.57206 | 10 |
| 9  | -7 | -10 | 45.2923 | 5.06040 | 13 |
| 8  | -7 | -10 | 61.1678 | 6.28756 | 13 |
| -8 | -7 | 10  | 46.1436 | 5.15986 | 10 |
| -8 | 7  | 10  | 57.8334 | 4.14516 | 11 |
| 7  | -7 | -10 | 20.5909 | 3.82890 | 13 |

|    |    |     |         |         |    |
|----|----|-----|---------|---------|----|
| -7 | 7  | 10  | 20.2326 | 3.44636 | 10 |
| -6 | -7 | 10  | 4.58176 | 4.43174 | 1  |
| 6  | -7 | -10 | 7.98139 | 3.04581 | 13 |
| -6 | -7 | 10  | 4.01376 | 3.04587 | 10 |
| -6 | 7  | 10  | 8.32854 | 2.71591 | 10 |
| -5 | -7 | 10  | 65.1434 | 9.64397 | 1  |
| 5  | -7 | -10 | 52.6324 | 6.57006 | 13 |
| 5  | 7  | -10 | 68.2425 | 6.94174 | 10 |
| -5 | 7  | 10  | 50.1744 | 6.17449 | 10 |
| -4 | -7 | 10  | 35.3055 | 5.40382 | 13 |
| 4  | -7 | -10 | 29.2287 | 4.88856 | 13 |
| 4  | 7  | -10 | 45.2727 | 5.85785 | 10 |
| -3 | 7  | 10  | 30.0340 | 4.71068 | 10 |
| 3  | 7  | -10 | 22.2326 | 3.84656 | 10 |
| -2 | 7  | 10  | 11.8031 | 5.55254 | 10 |
| 2  | 7  | -10 | 7.82655 | 2.55252 | 10 |
| 1  | 7  | -10 | 45.3771 | 4.82479 | 10 |
| 0  | -7 | -10 | 276.011 | 18.6532 | 10 |
| 0  | -7 | -10 | 274.384 | 21.2771 | 1  |
| 0  | 7  | -10 | 264.369 | 17.8644 | 10 |
| -1 | -7 | -10 | 200.027 | 16.0017 | 1  |
| -1 | -7 | -10 | 197.004 | 13.6435 | 10 |
| -1 | 7  | -10 | 194.602 | 12.1727 | 11 |
| 1  | 7  | 10  | 177.304 | 13.5330 | 13 |
| -1 | 7  | -10 | 174.075 | 12.8384 | 14 |
| -1 | 7  | -10 | 179.653 | 12.2558 | 8  |
| -1 | 7  | -10 | 176.771 | 12.7317 | 12 |
| -2 | -7 | -10 | 33.8510 | 6.67067 | 1  |
| -2 | 7  | -10 | 44.2225 | 3.42487 | 11 |
| -2 | 7  | -10 | 50.8214 | 5.15640 | 14 |
| -2 | 7  | -10 | 40.9324 | 3.90553 | 8  |
| -2 | 7  | -10 | 46.8368 | 5.45040 | 12 |
| -3 | -7 | -10 | 3.31997 | 3.48168 | 1  |
| -3 | -7 | -10 | 2.91141 | 2.47694 | 10 |
| -3 | -7 | -10 | 5.09924 | 2.12088 | 8  |
| -3 | 7  | -10 | 3.84191 | 2.46737 | 14 |
| 3  | 7  | 10  | 3.06121 | 3.13501 | 13 |
| -3 | 7  | -10 | 3.45611 | 2.45900 | 12 |
| -4 | -7 | -10 | 2.71661 | 2.07554 | 8  |
| -4 | -7 | -10 | 0.90928 | 2.19718 | 10 |
| -4 | 7  | -10 | 1.23154 | 2.35710 | 12 |
| 4  | 7  | 10  | 1.61019 | 3.35775 | 13 |
| -5 | -7 | -10 | -1.1164 | 1.52735 | 10 |
| -5 | -7 | -10 | 0.53487 | 1.71309 | 8  |
| -5 | 7  | -10 | 1.49163 | 0.93256 | 9  |
| -5 | 7  | -10 | 0.68574 | 0.52332 | 6  |
| -5 | 7  | -10 | -1.4382 | 2.11449 | 12 |
| 5  | 7  | 10  | 1.84226 | 2.92463 | 13 |
| -6 | 7  | -10 | 20.2785 | 3.30436 | 12 |
| 6  | 7  | 10  | 24.6253 | 4.46256 | 13 |

|    |    |     |         |         |    |
|----|----|-----|---------|---------|----|
| -9 | -8 | 10  | 35.9768 | 3.83259 | 10 |
| 9  | -8 | -10 | 31.9543 | 4.30189 | 13 |
| 8  | -8 | -10 | 3.43292 | 2.76097 | 13 |
| -8 | -8 | 10  | 5.75932 | 2.12734 | 10 |
| -8 | 8  | 10  | 4.23959 | 1.08271 | 11 |
| 7  | -8 | -10 | 34.7570 | 6.48135 | 13 |
| -7 | -8 | 10  | 24.9682 | 4.28841 | 10 |
| -7 | 8  | 10  | 25.1861 | 3.63297 | 10 |
| -6 | -8 | 10  | 13.7916 | 5.45638 | 1  |
| -6 | -8 | 10  | 10.7025 | 3.76730 | 10 |
| 6  | -8 | -10 | 8.49367 | 3.08422 | 13 |
| -6 | 8  | 10  | 7.87229 | 2.59053 | 10 |
| 5  | -8 | -10 | 31.8063 | 5.59180 | 13 |
| -5 | -8 | 10  | 18.5507 | 5.90499 | 1  |
| 5  | 8  | -10 | 19.1548 | 4.01088 | 10 |
| 4  | -8 | -10 | 34.1000 | 5.88661 | 13 |
| -4 | -8 | 10  | 21.5373 | 3.78467 | 13 |
| -4 | 8  | 10  | 27.2062 | 4.98673 | 10 |
| 4  | 8  | -10 | 21.9075 | 4.13343 | 10 |
| 3  | -8 | -10 | 20.0458 | 3.41904 | 13 |
| -3 | -8 | 10  | 20.3648 | 4.14410 | 13 |
| -3 | 8  | 10  | 19.9442 | 4.14243 | 10 |
| 3  | 8  | -10 | 19.4177 | 3.57711 | 10 |
| 2  | 8  | -10 | 27.9390 | 4.39287 | 10 |
| -2 | 8  | 10  | 29.3846 | 5.70481 | 10 |
| -1 | 8  | 10  | 5.13404 | 3.68657 | 10 |
| 1  | 8  | -10 | 2.78317 | 2.50697 | 10 |
| 0  | -8 | -10 | 79.9704 | 9.89149 | 1  |
| 0  | -8 | -10 | 68.0757 | 7.03458 | 10 |
| 0  | 8  | -10 | 69.7622 | 6.06478 | 10 |
| 0  | 8  | -10 | 67.3437 | 6.53879 | 14 |
| -1 | -8 | -10 | 100.339 | 11.1413 | 1  |
| -1 | -8 | -10 | 88.5460 | 8.83590 | 10 |
| -1 | 8  | -10 | 118.752 | 8.35133 | 12 |
| -1 | 8  | -10 | 124.556 | 8.90140 | 14 |
| 1  | 8  | 10  | 84.9598 | 9.64431 | 13 |
| -1 | 8  | -10 | 124.276 | 7.42651 | 11 |
| -2 | -8 | -10 | 216.063 | 17.7832 | 1  |
| -2 | -8 | -10 | 206.772 | 15.0593 | 10 |
| -2 | 8  | -10 | 211.116 | 14.8474 | 14 |
| -2 | 8  | -10 | 211.946 | 14.5988 | 12 |
| -2 | 8  | -10 | 218.112 | 13.4482 | 11 |
| -2 | 8  | -10 | 219.108 | 13.3560 | 11 |
| 2  | 8  | 10  | 213.596 | 15.2960 | 13 |
| -3 | -8 | -10 | 35.4921 | 4.23689 | 8  |
| -3 | -8 | -10 | 35.1613 | 5.96110 | 1  |
| -3 | -8 | -10 | 32.9376 | 4.70919 | 10 |
| 3  | 8  | 10  | 35.9352 | 5.43103 | 13 |
| -3 | 8  | -10 | 32.9477 | 4.44224 | 12 |
| -3 | 8  | -10 | 33.3691 | 4.99055 | 14 |

|    |    |     |         |         |    |
|----|----|-----|---------|---------|----|
| -4 | -8 | -10 | 0.94907 | 2.29489 | 10 |
| -4 | -8 | -10 | 3.39757 | 2.03202 | 8  |
| -4 | 8  | -10 | -0.9984 | 1.21475 | 9  |
| -4 | 8  | -10 | 5.98918 | 2.45957 | 12 |
| 4  | 8  | 10  | 0.27091 | 3.16553 | 13 |
| -5 | -8 | -10 | 1.17694 | 2.07087 | 10 |
| -5 | -8 | -10 | 3.23559 | 1.88760 | 8  |
| 5  | 8  | 10  | 5.20962 | 3.01923 | 13 |
| -5 | 8  | -10 | 3.69408 | 0.59057 | 6  |
| -5 | 8  | -10 | 8.47711 | 2.36918 | 12 |
| -5 | 8  | -10 | 4.47394 | 0.95507 | 9  |
| -6 | 8  | -10 | -1.1857 | 1.48311 | 12 |
| 6  | 8  | 10  | 0.40063 | 2.34681 | 13 |
| -9 | -9 | 10  | 0.86933 | 2.33249 | 10 |
| 9  | -9 | -10 | 3.25470 | 2.03459 | 13 |
| -8 | -9 | 10  | 9.27479 | 2.48504 | 10 |
| 8  | -9 | -10 | 5.85537 | 2.75702 | 13 |
| -8 | 9  | 10  | 4.31958 | 0.85070 | 11 |
| -8 | 9  | 10  | 3.73546 | 0.85163 | 11 |
| 7  | -9 | -10 | 28.7601 | 5.09160 | 13 |
| -7 | 9  | 10  | 29.2934 | 2.95544 | 11 |
| -7 | 9  | 10  | 28.8395 | 3.62419 | 10 |
| 6  | -9 | -10 | 38.6785 | 5.22928 | 13 |
| -6 | -9 | 10  | 35.3596 | 7.46193 | 1  |
| -6 | 9  | 10  | 32.6256 | 4.44935 | 10 |
| 6  | 9  | -10 | 42.0840 | 6.13956 | 10 |
| 5  | -9 | -10 | 10.1918 | 3.50489 | 13 |
| 5  | 9  | -10 | 4.31371 | 3.05308 | 10 |
| -5 | 9  | 10  | 9.51842 | 3.07699 | 10 |
| -4 | -9 | 10  | 19.6230 | 3.56073 | 13 |
| 4  | -9 | -10 | 20.0667 | 3.94349 | 13 |
| 4  | 9  | -10 | 20.7497 | 3.90967 | 10 |
| -4 | 9  | 10  | 17.4896 | 3.79713 | 10 |
| -3 | -9 | 10  | 27.3088 | 4.33622 | 13 |
| 3  | 9  | -10 | 34.7364 | 5.14886 | 10 |
| -2 | -9 | 10  | 23.5152 | 4.39300 | 13 |
| -2 | 9  | 10  | 16.6783 | 4.25153 | 10 |
| 2  | 9  | -10 | 24.5089 | 4.53907 | 10 |
| -1 | -9 | 10  | 32.1328 | 5.39821 | 13 |
| 1  | 9  | -10 | 39.0155 | 5.05750 | 14 |
| 1  | 9  | -10 | 44.2767 | 4.49699 | 10 |
| 0  | -9 | 10  | 151.397 | 10.7963 | 13 |
| 0  | -9 | -10 | 130.595 | 11.0037 | 10 |
| 0  | -9 | -10 | 123.114 | 12.9777 | 1  |
| 0  | 9  | -10 | 143.057 | 10.2505 | 14 |
| 0  | 9  | -10 | 140.909 | 9.93176 | 10 |
| -1 | -9 | -10 | 250.365 | 19.1692 | 1  |
| -1 | -9 | -10 | 222.914 | 15.6378 | 10 |
| -1 | 9  | -10 | 207.367 | 14.8963 | 14 |
| -1 | 9  | -10 | 212.734 | 13.9227 | 11 |

|    |     |     |         |         |    |
|----|-----|-----|---------|---------|----|
| 1  | 9   | 10  | 233.777 | 15.8950 | 13 |
| -1 | 9   | -10 | 202.857 | 14.7071 | 12 |
| -2 | -9  | -10 | 29.2512 | 4.81129 | 10 |
| -2 | -9  | -10 | 30.0784 | 6.13868 | 1  |
| -2 | 9   | -10 | 33.2063 | 4.66679 | 14 |
| -2 | 9   | -10 | 33.7753 | 2.36475 | 11 |
| 2  | 9   | 10  | 25.5912 | 4.37236 | 13 |
| -2 | 9   | -10 | 33.2906 | 4.32175 | 12 |
| -2 | 9   | -10 | 35.0376 | 2.39043 | 11 |
| -3 | -9  | -10 | 9.73014 | 3.18390 | 10 |
| -3 | -9  | -10 | 10.1780 | 3.80974 | 1  |
| -3 | 9   | -10 | 7.67419 | 2.97086 | 14 |
| 3  | 9   | 10  | 8.20082 | 4.31805 | 13 |
| -3 | 9   | -10 | 4.91228 | 2.66830 | 12 |
| -4 | -9  | -10 | 2.44081 | 2.04685 | 8  |
| -4 | -9  | -10 | 2.96190 | 2.38528 | 10 |
| -4 | 9   | -10 | 6.05695 | 2.45574 | 12 |
| 4  | 9   | 10  | 1.33659 | 3.10464 | 13 |
| -4 | 9   | -10 | 3.21004 | 2.47974 | 14 |
| -4 | 9   | -10 | 3.93313 | 0.81211 | 6  |
| -4 | 9   | -10 | 3.85198 | 1.06061 | 9  |
| -5 | -9  | -10 | 0.84561 | 1.74499 | 8  |
| -5 | -9  | -10 | -0.7890 | 1.69712 | 10 |
| -5 | 9   | -10 | 1.27892 | 0.50808 | 6  |
| -5 | 9   | -10 | 0.74997 | 0.71554 | 9  |
| 5  | 9   | 10  | 0.13731 | 3.21697 | 13 |
| -5 | 9   | -10 | 1.57711 | 2.17455 | 12 |
| -8 | -10 | 10  | 14.5222 | 3.19237 | 10 |
| 8  | -10 | -10 | 15.4294 | 3.01160 | 13 |
| -7 | -10 | 10  | 1.76891 | 1.97125 | 10 |
| 7  | -10 | -10 | 5.33438 | 2.91707 | 13 |
| -7 | 10  | 10  | 7.22251 | 1.31900 | 11 |
| 6  | 10  | -10 | 30.0035 | 5.70499 | 10 |
| -6 | 10  | 10  | 28.0777 | 3.91220 | 10 |
| 5  | -10 | -10 | 65.0065 | 6.75373 | 13 |
| 5  | 10  | -10 | 65.6684 | 7.08051 | 10 |
| -5 | 10  | 10  | 68.1777 | 6.68952 | 10 |
| -4 | -10 | 10  | 9.53170 | 3.05592 | 13 |
| 4  | -10 | -10 | 7.51796 | 3.44184 | 13 |
| -4 | 10  | 10  | 3.75502 | 2.93986 | 10 |
| 4  | 10  | -10 | 9.42729 | 3.22979 | 10 |
| 3  | -10 | -10 | 16.7389 | 3.55595 | 13 |
| -3 | -10 | 10  | 13.2598 | 4.01767 | 13 |
| 3  | 10  | -10 | 23.0314 | 3.77585 | 10 |
| -3 | 10  | 10  | 14.5499 | 3.84087 | 10 |
| -2 | -10 | 10  | 5.27356 | 3.69670 | 13 |
| 2  | 10  | -10 | 9.91510 | 2.73731 | 10 |
| -2 | 10  | 10  | 10.8905 | 3.65492 | 10 |
| 1  | -10 | -10 | 107.264 | 9.51110 | 13 |
| -1 | -10 | 10  | 128.954 | 10.0660 | 13 |

|    |     |     |         |         |    |
|----|-----|-----|---------|---------|----|
| -1 | 10  | 10  | 110.819 | 10.4986 | 10 |
| 1  | 10  | -10 | 124.173 | 8.98491 | 10 |
| 1  | 10  | -10 | 121.860 | 9.02535 | 14 |
| 0  | -10 | 10  | 55.7058 | 7.19700 | 13 |
| 0  | 10  | -10 | 43.8805 | 5.23565 | 14 |
| -1 | -10 | -10 | 162.747 | 14.5179 | 1  |
| -1 | -10 | -10 | 165.111 | 11.7855 | 10 |
| -1 | 10  | -10 | 146.574 | 9.72692 | 11 |
| -1 | 10  | -10 | 145.646 | 10.9205 | 14 |
| -1 | 10  | -10 | 138.424 | 10.6314 | 12 |
| -2 | -10 | -10 | 49.0996 | 7.40558 | 1  |
| -2 | -10 | -10 | 49.2863 | 5.57562 | 10 |
| -2 | 10  | -10 | 33.9348 | 4.50487 | 12 |
| -2 | 10  | -10 | 34.7393 | 4.98592 | 14 |
| 2  | 10  | 10  | 45.4209 | 5.99576 | 13 |
| -3 | 10  | -10 | 18.8040 | 3.80183 | 14 |
| 3  | 10  | 10  | 15.8030 | 3.83457 | 13 |
| -3 | 10  | -10 | 10.6785 | 2.91594 | 12 |
| -3 | 10  | -10 | 21.6022 | 2.19443 | 9  |
| -4 | -10 | -10 | 41.8007 | 4.13927 | 8  |
| -4 | -10 | -10 | 35.4923 | 4.33953 | 10 |
| 4  | 10  | 10  | 39.2741 | 5.92559 | 13 |
| -4 | 10  | -10 | 58.5991 | 5.50801 | 14 |
| -4 | 10  | -10 | 46.2720 | 3.30488 | 9  |
| -4 | 10  | -10 | 47.8024 | 3.08058 | 6  |
| -4 | 10  | -10 | 52.0369 | 5.26250 | 12 |
| -5 | -10 | -10 | 6.22500 | 1.56975 | 8  |
| -5 | -10 | -10 | 5.07964 | 1.92895 | 10 |
| -5 | 10  | -10 | 3.48314 | 0.78447 | 9  |
| -5 | 10  | -10 | 3.44651 | 2.10992 | 12 |
| 5  | 10  | 10  | 2.89984 | 2.53457 | 13 |
| -5 | 10  | -10 | 3.26866 | 0.55005 | 6  |
| -8 | -11 | 10  | 16.7069 | 3.20736 | 10 |
| 8  | -11 | -10 | 25.7705 | 4.72518 | 13 |
| 7  | -11 | -10 | -0.1364 | 2.84610 | 13 |
| -7 | -11 | 10  | 1.51989 | 2.06189 | 10 |
| -7 | 11  | 10  | 3.96837 | 1.19563 | 11 |
| 7  | 11  | -10 | 2.61700 | 2.44972 | 10 |
| 6  | -11 | -10 | 19.0411 | 3.66307 | 13 |
| 6  | 11  | -10 | 15.5944 | 4.01788 | 10 |
| -6 | 11  | 10  | 18.7857 | 3.08001 | 10 |
| 5  | -11 | -10 | 10.7963 | 3.33345 | 13 |
| -5 | -11 | 10  | 15.8716 | 3.08038 | 13 |
| -5 | 11  | 10  | 15.2473 | 3.26879 | 10 |
| 5  | 11  | -10 | 19.5036 | 3.93801 | 10 |
| 4  | -11 | -10 | 24.9527 | 3.78577 | 13 |
| -4 | -11 | 10  | 18.3971 | 3.93813 | 13 |
| 4  | 11  | -10 | 15.4092 | 3.67965 | 10 |
| -4 | 11  | 10  | 23.8790 | 4.60321 | 10 |
| -3 | -11 | 10  | 38.2870 | 6.08198 | 13 |



|    |     |     |         |         |    |
|----|-----|-----|---------|---------|----|
| 3  | -11 | -10 | 33.8370 | 5.88543 | 13 |
| -3 | 11  | 10  | 33.4156 | 5.27952 | 10 |
| 3  | 11  | -10 | 40.5061 | 4.98287 | 10 |
| -2 | -11 | 10  | 12.5311 | 3.35159 | 13 |
| 2  | -11 | -10 | 28.1258 | 4.63837 | 13 |
| 2  | 11  | -10 | 18.8753 | 3.31541 | 10 |
| -2 | 11  | 10  | 29.4948 | 5.41695 | 10 |
| -1 | -11 | 10  | 43.1410 | 6.15124 | 13 |
| 1  | -11 | -10 | 38.8827 | 5.25206 | 13 |
| -1 | 11  | 10  | 45.7073 | 6.53438 | 10 |
| 1  | 11  | -10 | 45.4243 | 5.13975 | 14 |
| 1  | 11  | -10 | 49.5412 | 5.02955 | 10 |
| 0  | -11 | -10 | 30.6548 | 6.45077 | 1  |
| 0  | 11  | -10 | 17.1428 | 3.20074 | 14 |
| 0  | 11  | -10 | 19.5159 | 2.46423 | 11 |
| 0  | 11  | 10  | 25.3670 | 4.83765 | 10 |
| -1 | 11  | -10 | 47.8090 | 5.29537 | 14 |
| -1 | 11  | -10 | 47.8006 | 3.53853 | 11 |
| -1 | 11  | -10 | 46.4735 | 3.80552 | 11 |
| -2 | -11 | -10 | 13.2160 | 3.48089 | 10 |
| -2 | -11 | -10 | 16.6373 | 5.50546 | 1  |
| -2 | 11  | -10 | 16.8718 | 3.64045 | 14 |
| -2 | 11  | -10 | 16.6602 | 3.36515 | 12 |
| -3 | -11 | -10 | 23.1598 | 4.32556 | 10 |
| -3 | 11  | -10 | 18.0103 | 1.89887 | 6  |
| -3 | 11  | -10 | 18.7490 | 3.32957 | 12 |
| -3 | 11  | -10 | 18.3380 | 3.41843 | 14 |
| 3  | 11  | 10  | 21.0837 | 4.28151 | 13 |
| -3 | 11  | -10 | 16.5990 | 2.06720 | 9  |
| -4 | -11 | -10 | 4.17952 | 1.95228 | 10 |
| -4 | 11  | -10 | 4.69093 | 1.15092 | 9  |
| -4 | 11  | -10 | 5.03976 | 0.71708 | 6  |
| 4  | 11  | 10  | 3.20655 | 2.85999 | 13 |
| -5 | -11 | -10 | 0.67198 | 1.75326 | 10 |
| -5 | 11  | -10 | 0.72352 | 0.60546 | 9  |
| 5  | 11  | 10  | 0.32343 | 2.54214 | 13 |
| -5 | 11  | -10 | 1.05090 | 1.94694 | 12 |
| -5 | 11  | -10 | 1.77176 | 0.71650 | 9  |
| -8 | -12 | 10  | 7.18896 | 2.05210 | 10 |
| 7  | -12 | -10 | 17.5621 | 3.26979 | 13 |
| 7  | 12  | -10 | 9.99245 | 3.64468 | 10 |
| -7 | 12  | 10  | 18.3472 | 1.81521 | 11 |
| -7 | 12  | 10  | 18.7599 | 2.00592 | 11 |
| 6  | -12 | -10 | 12.3004 | 3.57727 | 13 |
| -6 | 12  | 10  | 9.51549 | 2.14350 | 10 |
| -6 | 12  | 10  | 11.1411 | 1.99020 | 11 |
| 5  | -12 | -10 | 0.47681 | 3.00790 | 13 |
| -5 | -12 | 10  | 1.00494 | 2.66165 | 13 |
| 5  | 12  | -10 | -2.4995 | 3.10833 | 10 |
| -5 | 12  | 10  | -0.4577 | 2.84030 | 10 |

|    |     |     |         |         |    |
|----|-----|-----|---------|---------|----|
| 4  | -12 | -10 | 26.2256 | 3.96461 | 13 |
| -4 | -12 | 10  | 25.8375 | 4.75189 | 13 |
| -4 | 12  | 10  | 24.9930 | 4.64750 | 10 |
| 4  | 12  | -10 | 21.2997 | 3.93825 | 10 |
| 3  | -12 | -10 | 16.7508 | 3.83564 | 13 |
| -3 | -12 | 10  | 13.0701 | 3.69971 | 13 |
| -3 | 12  | 10  | 14.4841 | 3.62654 | 10 |
| 3  | 12  | -10 | 8.09641 | 2.85586 | 10 |
| -2 | -12 | 10  | 3.78078 | 3.24926 | 13 |
| 2  | -12 | -10 | -0.6840 | 2.43856 | 13 |
| 2  | 12  | -10 | 6.10298 | 2.75440 | 10 |
| -2 | 12  | 10  | 0.33342 | 3.06354 | 10 |
| -1 | -12 | 10  | 17.1964 | 3.36168 | 13 |
| 1  | -12 | -10 | 11.2581 | 2.96488 | 13 |
| 1  | 12  | -10 | 15.9099 | 2.91297 | 10 |
| 1  | 12  | -10 | 16.2330 | 3.01546 | 14 |
| -1 | 12  | 10  | 9.60355 | 3.93723 | 10 |
| 0  | -12 | -10 | 48.6857 | 9.26557 | 1  |
| 0  | 12  | 10  | 46.5316 | 6.44487 | 10 |
| 0  | 12  | -10 | 32.1847 | 3.65444 | 11 |
| 0  | 12  | -10 | 31.8418 | 5.43498 | 14 |
| -1 | -12 | -10 | 12.6929 | 4.86003 | 1  |
| -1 | -12 | -10 | 11.0230 | 3.39825 | 10 |
| -1 | 12  | -10 | 7.85058 | 1.07296 | 11 |
| -1 | 12  | -10 | 8.01125 | 1.03913 | 11 |
| -1 | 12  | -10 | 5.13202 | 2.59127 | 14 |
| -2 | -12 | -10 | 4.10443 | 3.17025 | 10 |
| -2 | -12 | -10 | 0.11086 | 3.39261 | 1  |
| -2 | 12  | -10 | -1.9964 | 2.74408 | 12 |
| -3 | -12 | -10 | 27.7278 | 4.52932 | 10 |
| -3 | 12  | -10 | 23.3108 | 2.52674 | 9  |
| -3 | 12  | -10 | 28.6116 | 2.13774 | 6  |
| -4 | 12  | -10 | 7.97406 | 2.43635 | 12 |
| -4 | 12  | -10 | 5.90619 | 0.69661 | 6  |
| -4 | 12  | -10 | 7.02038 | 1.13845 | 9  |
| -4 | 12  | -10 | 9.08160 | 2.66179 | 14 |
| -5 | -12 | -10 | 3.83578 | 1.78057 | 10 |
| -5 | 12  | -10 | 6.95422 | 2.05969 | 12 |
| 8  | -13 | -10 | 3.63800 | 1.95103 | 13 |
| 7  | -13 | -10 | -0.7789 | 2.34700 | 13 |
| 7  | 13  | -10 | 2.27516 | 3.16119 | 10 |
| 6  | -13 | -10 | 57.5633 | 6.44893 | 13 |
| 6  | 13  | -10 | 68.2220 | 6.25573 | 10 |
| -6 | 13  | 10  | 57.1628 | 4.49542 | 11 |
| -5 | -13 | 10  | 12.6953 | 3.52993 | 13 |
| 5  | -13 | -10 | 16.5478 | 3.82241 | 13 |
| -5 | 13  | 10  | 18.0818 | 3.14612 | 10 |
| 5  | 13  | -10 | 8.01045 | 3.52439 | 10 |
| -4 | -13 | 10  | 14.4285 | 3.84745 | 13 |
| 4  | -13 | -10 | 19.7447 | 4.11537 | 13 |

|    |     |     |         |         |    |
|----|-----|-----|---------|---------|----|
| 4  | 13  | -10 | 12.8094 | 3.41846 | 10 |
| -4 | 13  | 10  | 16.6205 | 3.51009 | 10 |
| 3  | -13 | -10 | 19.0480 | 3.92024 | 13 |
| -3 | -13 | 10  | 12.2954 | 3.69302 | 13 |
| 3  | 13  | -10 | 14.5343 | 3.62939 | 10 |
| -3 | 13  | 10  | 19.2119 | 3.90498 | 10 |
| 2  | -13 | -10 | 6.16207 | 2.66363 | 13 |
| -2 | -13 | 10  | 10.9790 | 2.98429 | 13 |
| 2  | 13  | -10 | 11.8243 | 2.97645 | 10 |
| -2 | 13  | 10  | 5.94963 | 3.39982 | 10 |
| -1 | -13 | 10  | 6.87512 | 3.16147 | 13 |
| 1  | -13 | -10 | 1.77249 | 2.32263 | 13 |
| 1  | 13  | -10 | 8.39149 | 2.32507 | 10 |
| 1  | 13  | -10 | 6.22470 | 2.53377 | 14 |
| -1 | 13  | 10  | 3.28431 | 3.39655 | 10 |
| 0  | -13 | -10 | 20.7667 | 6.16030 | 1  |
| 0  | 13  | -10 | 35.3896 | 3.21766 | 11 |
| 0  | 13  | 10  | 23.6728 | 4.83425 | 10 |
| 0  | 13  | -10 | 33.0232 | 4.83149 | 14 |
| -1 | -13 | -10 | 37.2562 | 7.68986 | 1  |
| 1  | 13  | 10  | 31.0306 | 7.45058 | 10 |
| -2 | -13 | -10 | 24.2779 | 4.28890 | 10 |
| -2 | 13  | -10 | 23.8464 | 3.79034 | 14 |
| -2 | 13  | -10 | 25.4580 | 3.93019 | 12 |
| -3 | -13 | -10 | 12.4324 | 3.12586 | 10 |
| -3 | 13  | -10 | 6.99392 | 1.24194 | 9  |
| -3 | 13  | -10 | 6.59042 | 2.89955 | 14 |
| -3 | 13  | -10 | 7.59327 | 0.95553 | 6  |
| -3 | 13  | -10 | 8.18228 | 2.53269 | 12 |
| -4 | -13 | -10 | 1.21178 | 2.38812 | 10 |
| -4 | 13  | -10 | 1.51804 | 2.26518 | 14 |
| -4 | 13  | -10 | 1.62333 | 0.77905 | 9  |
| -4 | 13  | -10 | 4.31531 | 2.25571 | 12 |
| -4 | 13  | -10 | 2.28445 | 0.43438 | 6  |
| -4 | 13  | -10 | 2.29434 | 0.42526 | 6  |
| -5 | -13 | -10 | 3.38140 | 1.71971 | 10 |
| -5 | 13  | -10 | 4.62420 | 1.83683 | 12 |
| 7  | -14 | -10 | 2.92555 | 2.63430 | 13 |
| 7  | 14  | -10 | 11.5275 | 2.63167 | 10 |
| 6  | 14  | -10 | 8.79257 | 3.71304 | 10 |
| -6 | 14  | 10  | 16.3932 | 1.96074 | 11 |
| 5  | -14 | -10 | 9.46485 | 3.55959 | 13 |
| 5  | 14  | -10 | 16.8255 | 3.99244 | 10 |
| -5 | 14  | 10  | 12.3316 | 2.95900 | 10 |
| 4  | -14 | -10 | 11.0386 | 3.45423 | 13 |
| -4 | -14 | 10  | 6.42716 | 3.71151 | 13 |
| 4  | 14  | -10 | 8.91619 | 3.23853 | 10 |
| 3  | -14 | -10 | 49.2249 | 5.92430 | 13 |
| -3 | -14 | 10  | 46.5895 | 5.80251 | 13 |
| -3 | 14  | 10  | 44.5082 | 5.93557 | 10 |

|    |     |     |         |         |    |
|----|-----|-----|---------|---------|----|
| 3  | 14  | -10 | 49.2204 | 5.50948 | 10 |
| -2 | -14 | 10  | 3.23905 | 3.19466 | 13 |
| 2  | -14 | -10 | 0.90672 | 2.94157 | 13 |
| 2  | 14  | -10 | 1.72491 | 2.07859 | 10 |
| -2 | 14  | 10  | 1.42477 | 3.20730 | 10 |
| -1 | -14 | 10  | 6.35643 | 3.08885 | 13 |
| 1  | -14 | -10 | 4.42641 | 3.01649 | 13 |
| -1 | 14  | 10  | 4.16625 | 3.49849 | 10 |
| 1  | 14  | -10 | 1.56053 | 2.45862 | 14 |
| 1  | 14  | -10 | 7.86655 | 2.20879 | 11 |
| 0  | 14  | -10 | 62.1967 | 6.58373 | 14 |
| 0  | 14  | -10 | 70.1930 | 5.36009 | 11 |
| 0  | 14  | -10 | 70.3756 | 5.00670 | 11 |
| -1 | -14 | -10 | 46.5271 | 8.18604 | 1  |
| 1  | 14  | 10  | 45.6659 | 5.99959 | 10 |
| -2 | 14  | -10 | 4.87429 | 2.86972 | 14 |
| -2 | 14  | -10 | 4.68070 | 2.78021 | 12 |
| -2 | 14  | -10 | 0.85400 | 1.23784 | 9  |
| -3 | 14  | -10 | 2.08249 | 0.60578 | 6  |
| -3 | 14  | -10 | 0.97488 | 2.60250 | 14 |
| -3 | 14  | -10 | 1.68460 | 0.88770 | 9  |
| -3 | 14  | -10 | 1.23722 | 1.68095 | 12 |
| -4 | 14  | -10 | 1.74696 | 0.62928 | 9  |
| -4 | 14  | -10 | 5.32597 | 2.24598 | 14 |
| -4 | 14  | -10 | 2.25879 | 2.09075 | 12 |
| -4 | 14  | -10 | 2.77350 | 0.61283 | 9  |
| 7  | -15 | -10 | 10.7977 | 2.36064 | 13 |
| 7  | 15  | -10 | 11.2842 | 3.13858 | 10 |
| 6  | -15 | -10 | 13.0072 | 3.06400 | 13 |
| -6 | 15  | 10  | 12.9970 | 1.59217 | 11 |
| -6 | 15  | 10  | 13.2278 | 1.68491 | 11 |
| 5  | -15 | -10 | 3.19304 | 2.89959 | 13 |
| -5 | -15 | 10  | 5.79332 | 2.43890 | 13 |
| -5 | 15  | 10  | 4.16880 | 1.40988 | 11 |
| -5 | 15  | 10  | 4.99414 | 2.10002 | 10 |
| 5  | 15  | -10 | 4.71133 | 3.09536 | 10 |
| -4 | -15 | 10  | 25.9969 | 3.86546 | 13 |
| 4  | 15  | -10 | 25.2679 | 4.65092 | 10 |
| -3 | -15 | 10  | 27.5435 | 4.67354 | 13 |
| 3  | -15 | -10 | 23.5708 | 4.12279 | 13 |
| 3  | 15  | -10 | 34.1846 | 4.59612 | 10 |
| -3 | 15  | 10  | 23.9249 | 4.45022 | 10 |
| 2  | -15 | -10 | 39.5758 | 5.40495 | 13 |
| -2 | -15 | 10  | 46.0325 | 6.12042 | 13 |
| -2 | 15  | 10  | 42.3407 | 6.17740 | 10 |
| 2  | 15  | -10 | 47.5223 | 5.08638 | 10 |
| -1 | -15 | 10  | 5.96846 | 2.59582 | 13 |
| 1  | -15 | -10 | 3.25460 | 2.51266 | 13 |
| 1  | 15  | -10 | 5.28934 | 2.77153 | 14 |
| 1  | 15  | -10 | 5.93933 | 1.80062 | 11 |

|    |     |     |         |         |    |
|----|-----|-----|---------|---------|----|
| -1 | 15  | 10  | 4.24259 | 3.57548 | 10 |
| 0  | 15  | -10 | 130.170 | 10.5723 | 14 |
| 0  | 15  | 10  | 161.045 | 11.9879 | 10 |
| 0  | 15  | -10 | 137.666 | 8.86072 | 11 |
| 0  | 15  | -10 | 133.458 | 8.76323 | 11 |
| 1  | 15  | 10  | 37.6497 | 6.29030 | 10 |
| -1 | 15  | -10 | 32.9483 | 5.37199 | 14 |
| -2 | -15 | -10 | 7.69730 | 3.06903 | 10 |
| -2 | 15  | -10 | 8.11772 | 2.84418 | 14 |
| -2 | 15  | -10 | 7.11680 | 1.26754 | 9  |
| -2 | 15  | -10 | 6.15778 | 3.76760 | 12 |
| -2 | 15  | -10 | 7.88310 | 0.91279 | 6  |
| -3 | -15 | -10 | 0.01288 | 1.75118 | 10 |
| -3 | 15  | -10 | 0.88940 | 2.56161 | 12 |
| -3 | 15  | -10 | 0.91521 | 0.48518 | 6  |
| -3 | 15  | -10 | -1.0288 | 0.86657 | 9  |
| -3 | 15  | -10 | -1.5075 | 2.38159 | 14 |
| -4 | -15 | -10 | 1.77352 | 1.58973 | 10 |
| -4 | 15  | -10 | 3.43698 | 1.98306 | 14 |
| -4 | 15  | -10 | 4.23287 | 1.93851 | 12 |
| 7  | -16 | -10 | 4.24799 | 1.88342 | 13 |
| 7  | 16  | -10 | 2.33159 | 1.83335 | 10 |
| 6  | -16 | -10 | 2.44725 | 2.24594 | 13 |
| 6  | 16  | -10 | 4.35140 | 2.99596 | 10 |
| -5 | -16 | 10  | -1.9753 | 2.28693 | 13 |
| 5  | -16 | -10 | 0.15527 | 2.96642 | 13 |
| -5 | 16  | 10  | -1.7920 | 1.05923 | 11 |
| 5  | 16  | -10 | -0.1507 | 3.04805 | 10 |
| -4 | -16 | 10  | 13.0036 | 3.08325 | 13 |
| 4  | -16 | -10 | 10.2101 | 3.31389 | 13 |
| 4  | 16  | -10 | 15.0370 | 3.40338 | 10 |
| -4 | 16  | 10  | 12.8262 | 2.85822 | 10 |
| 3  | -16 | -10 | 7.13659 | 3.08864 | 13 |
| -3 | -16 | 10  | 5.17827 | 2.77236 | 13 |
| -3 | 16  | 10  | 9.96637 | 3.13822 | 10 |
| 3  | 16  | -10 | 5.97293 | 2.57452 | 10 |
| -2 | -16 | 10  | 10.4365 | 3.58231 | 13 |
| 2  | -16 | -10 | 12.1696 | 3.68135 | 13 |
| 2  | 16  | -10 | 12.5750 | 2.63259 | 10 |
| 1  | -16 | -10 | 82.6860 | 7.27561 | 13 |
| -1 | -16 | 10  | 75.0134 | 7.74593 | 13 |
| -1 | 16  | 10  | 86.6789 | 8.25332 | 10 |
| 1  | 16  | -10 | 71.0630 | 7.13091 | 14 |
| 1  | 16  | -10 | 71.0060 | 5.78093 | 11 |
| 0  | 16  | -10 | 13.5885 | 3.29682 | 14 |
| 0  | 16  | 10  | 14.8373 | 4.15441 | 10 |
| 1  | 16  | 10  | 0.80661 | 3.44781 | 10 |
| -1 | 16  | -10 | 1.27497 | 2.57447 | 14 |
| -2 | -16 | -10 | 20.5202 | 4.09086 | 10 |
| 2  | 16  | 10  | 21.4682 | 4.73820 | 10 |

|    |     |     |         |         |    |
|----|-----|-----|---------|---------|----|
| -2 | 16  | -10 | 22.7605 | 2.26952 | 9  |
| -2 | 16  | -10 | 25.5874 | 1.87278 | 6  |
| -3 | -16 | -10 | 0.96624 | 2.40269 | 10 |
| -3 | 16  | -10 | 5.15680 | 2.43260 | 14 |
| -3 | 16  | -10 | 3.52242 | 1.95039 | 12 |
| -3 | 16  | -10 | 1.81292 | 0.48219 | 6  |
| -3 | 16  | -10 | 1.69731 | 0.75719 | 9  |
| -3 | 16  | -10 | 1.62686 | 0.45047 | 6  |
| -4 | -16 | -10 | 3.77084 | 2.10069 | 10 |
| -4 | 16  | -10 | 7.20528 | 1.88140 | 12 |
| 6  | -17 | -10 | 20.6200 | 3.68764 | 13 |
| 6  | 17  | -10 | 29.4450 | 4.38440 | 10 |
| -5 | -17 | 10  | 3.33564 | 2.55121 | 13 |
| 5  | -17 | -10 | 5.63920 | 2.80974 | 13 |
| -5 | 17  | 10  | 7.46517 | 1.23204 | 11 |
| 5  | 17  | -10 | 5.26605 | 2.95899 | 10 |
| 4  | -17 | -10 | 20.6287 | 3.70263 | 13 |
| -4 | 17  | 10  | 17.2405 | 3.17293 | 10 |
| 4  | 17  | -10 | 26.0578 | 4.34610 | 10 |
| -3 | -17 | 10  | 3.29587 | 2.64670 | 13 |
| 3  | -17 | -10 | 7.00320 | 3.14808 | 13 |
| -3 | 17  | 10  | 9.27352 | 2.83431 | 10 |
| 3  | 17  | -10 | 6.10422 | 2.53441 | 10 |
| -2 | -17 | 10  | 3.83127 | 2.83669 | 13 |
| 2  | -17 | -10 | 6.81111 | 2.95154 | 13 |
| 2  | 17  | -10 | 1.84118 | 1.91904 | 11 |
| 1  | -17 | -10 | 57.7750 | 7.00848 | 13 |
| -1 | -17 | 10  | 60.3981 | 6.42480 | 13 |
| -1 | 17  | 10  | 66.6996 | 7.35145 | 10 |
| 1  | 17  | -10 | 63.0884 | 4.74841 | 11 |
| 1  | 17  | -10 | 67.1702 | 4.67234 | 11 |
| 1  | 17  | -10 | 59.8190 | 6.46399 | 14 |
| 0  | 17  | -10 | 10.7164 | 3.09096 | 14 |
| 0  | 17  | 10  | 9.10415 | 3.79784 | 10 |
| 1  | 17  | 10  | -0.7114 | 2.46049 | 10 |
| -1 | 17  | -10 | 3.05323 | 2.73461 | 14 |
| 2  | 17  | 10  | 3.33090 | 2.56756 | 10 |
| -2 | 17  | -10 | 9.06844 | 2.76948 | 14 |
| -2 | 17  | -10 | 3.97792 | 0.61396 | 6  |
| -2 | 17  | -10 | 4.47323 | 1.01866 | 9  |
| -3 | -17 | -10 | 2.12979 | 1.66787 | 10 |
| -3 | 17  | -10 | 2.00209 | 0.64641 | 9  |
| -3 | 17  | -10 | 2.39424 | 2.23451 | 14 |
| -3 | 17  | -10 | 2.30220 | 0.64007 | 9  |
| -3 | 17  | -10 | 2.72228 | 1.76034 | 12 |
| 6  | -18 | -10 | 18.3527 | 3.10111 | 13 |
| 6  | 18  | -10 | 15.8229 | 3.01440 | 10 |
| 5  | -18 | -10 | 1.60869 | 2.27750 | 13 |
| -5 | -18 | 10  | 0.46665 | 2.18230 | 13 |
| -5 | 18  | 10  | 0.40510 | 0.63456 | 11 |

|    |     |     |         |         |    |
|----|-----|-----|---------|---------|----|
| 5  | 18  | -10 | -1.1738 | 2.22738 | 10 |
| -5 | 18  | 10  | 0.27194 | 0.56767 | 11 |
| 4  | -18 | -10 | 24.1487 | 3.67720 | 13 |
| -4 | -18 | 10  | 22.5320 | 3.34920 | 13 |
| -4 | 18  | 10  | 24.6863 | 2.99637 | 11 |
| 4  | 18  | -10 | 21.6806 | 3.77001 | 10 |
| 3  | -18 | -10 | 9.13624 | 3.14231 | 13 |
| -3 | -18 | 10  | 6.90090 | 2.86428 | 13 |
| 3  | 18  | -10 | 11.6285 | 2.79447 | 10 |
| 2  | -18 | -10 | 13.6442 | 3.74975 | 13 |
| -2 | -18 | 10  | 22.7969 | 3.43976 | 13 |
| 2  | 18  | -10 | 23.2464 | 3.16299 | 11 |
| -2 | 18  | 10  | 13.8248 | 3.52194 | 10 |
| 1  | -18 | -10 | 6.16380 | 2.71493 | 13 |
| -1 | -18 | 10  | 3.97626 | 2.37576 | 13 |
| -1 | 18  | 10  | 5.75848 | 3.35745 | 10 |
| 1  | 18  | -10 | 6.06471 | 2.72191 | 14 |
| 0  | 18  | 10  | 9.94784 | 3.20849 | 10 |
| 1  | 18  | 10  | 71.2555 | 7.39651 | 10 |
| -1 | 18  | -10 | 72.5696 | 6.70268 | 14 |
| -2 | 18  | -10 | 5.69806 | 0.69281 | 6  |
| 2  | 18  | 10  | 11.4266 | 3.45278 | 10 |
| -2 | 18  | -10 | 5.97369 | 1.09269 | 9  |
| -2 | 18  | -10 | 6.68348 | 2.52752 | 14 |
| -3 | -18 | -10 | 5.83203 | 1.82262 | 10 |
| -5 | -19 | 10  | 0.20900 | 1.90935 | 13 |
| 5  | -19 | -10 | 2.99245 | 2.04171 | 13 |
| 5  | 19  | -10 | 1.26182 | 2.02155 | 10 |
| 4  | -19 | -10 | 7.32338 | 2.75557 | 13 |
| -4 | -19 | 10  | 5.21490 | 2.36306 | 13 |
| -4 | 19  | 10  | 7.75650 | 1.34212 | 11 |
| 4  | 19  | -10 | 7.84869 | 2.20645 | 10 |
| 3  | -19 | -10 | 2.80926 | 2.68145 | 13 |
| -3 | -19 | 10  | 2.98114 | 2.33026 | 13 |
| -3 | 19  | 10  | 2.62160 | 1.90589 | 10 |
| 3  | 19  | -10 | 0.83244 | 1.75054 | 11 |
| -2 | -19 | 10  | 23.5009 | 3.50862 | 13 |
| 2  | 19  | -10 | 20.8412 | 2.90408 | 11 |
| -2 | 19  | 10  | 28.9247 | 3.58764 | 10 |
| 2  | 19  | -10 | 16.4521 | 2.96699 | 11 |
| -1 | -19 | 10  | 1.96161 | 2.23198 | 13 |
| 1  | -19 | -10 | 0.74831 | 2.94594 | 13 |
| -1 | 19  | 10  | 2.37880 | 3.03998 | 10 |
| 1  | 19  | -10 | 2.11975 | 2.40345 | 14 |
| 0  | 19  | -10 | 19.6012 | 3.26754 | 14 |
| 0  | 19  | 10  | 21.4903 | 3.69885 | 10 |
| -1 | 19  | -10 | 10.1264 | 1.41392 | 9  |
| -1 | 19  | -10 | 11.0339 | 2.84680 | 14 |
| 1  | 19  | 10  | 11.4630 | 2.88761 | 10 |
| -2 | 19  | -10 | 7.85677 | 2.33358 | 14 |

|    |     |     |         |         |    |
|----|-----|-----|---------|---------|----|
| -2 | 19  | -10 | 7.71648 | 1.00463 | 9  |
| 2  | 19  | 10  | 9.29313 | 3.17304 | 10 |
| 5  | -20 | -10 | 11.0114 | 2.24431 | 13 |
| 5  | 20  | -10 | 13.1864 | 3.87184 | 10 |
| -4 | -20 | 10  | 1.30127 | 1.87175 | 13 |
| 4  | -20 | -10 | 1.83256 | 2.10435 | 13 |
| 4  | 20  | -10 | 1.68117 | 1.76284 | 11 |
| 4  | 20  | -10 | 0.94652 | 1.73464 | 10 |
| -4 | 20  | 10  | 1.52814 | 0.75048 | 11 |
| -4 | 20  | 10  | 1.67562 | 0.70716 | 11 |
| -3 | -20 | 10  | -0.3919 | 1.94581 | 13 |
| 3  | -20 | -10 | 1.60897 | 2.25676 | 13 |
| 3  | 20  | -10 | 0.43822 | 1.25471 | 11 |
| -3 | 20  | 10  | 1.36075 | 1.21039 | 11 |
| -2 | -20 | 10  | 11.4812 | 2.67193 | 13 |
| 2  | -20 | -10 | 17.8695 | 3.14466 | 13 |
| -2 | 20  | 10  | 11.9727 | 3.14835 | 10 |
| 1  | -20 | -10 | -2.0483 | 2.21429 | 13 |
| -1 | -20 | 10  | 0.35134 | 2.32709 | 13 |
| -1 | 20  | 10  | -1.8196 | 2.32726 | 10 |
| 0  | 20  | 10  | 1.45661 | 2.64939 | 10 |
| 1  | 20  | 10  | 0.36464 | 2.65387 | 10 |
| -1 | 20  | -10 | 1.53720 | 0.94130 | 9  |
| 2  | 20  | 10  | 46.6970 | 4.67589 | 10 |
| -4 | -21 | 10  | 1.28810 | 1.99088 | 13 |
| 4  | -21 | -10 | 1.34359 | 1.87886 | 13 |
| 4  | 21  | -10 | 2.00266 | 1.16120 | 11 |
| -3 | -21 | 10  | 15.0621 | 2.72978 | 13 |
| 3  | -21 | -10 | 11.8822 | 2.50345 | 13 |
| 3  | 21  | -10 | 14.0347 | 1.76964 | 11 |
| -3 | 21  | 10  | 11.3862 | 1.50269 | 11 |
| 3  | 21  | -10 | 15.4447 | 1.79807 | 11 |
| 2  | -21 | -10 | 53.5684 | 5.18074 | 13 |
| -2 | -21 | 10  | 58.3960 | 5.12568 | 13 |
| -2 | 21  | 10  | 51.2888 | 4.83234 | 10 |
| -1 | -21 | 10  | 3.97390 | 2.14049 | 13 |
| 1  | -21 | -10 | 4.80826 | 2.36186 | 13 |
| -1 | 21  | 10  | 3.08460 | 2.08403 | 10 |
| 0  | 21  | 10  | 3.43834 | 1.85354 | 10 |
| 1  | 21  | 10  | 1.22275 | 2.23300 | 10 |
| 3  | -22 | -10 | 18.4605 | 2.67004 | 13 |
| -3 | -22 | 10  | 22.2992 | 3.16641 | 13 |
| 2  | -22 | -10 | 37.4568 | 4.09806 | 13 |
| -2 | -22 | 10  | 50.8087 | 4.49469 | 13 |
| -2 | 22  | 10  | 40.9213 | 3.60020 | 11 |
| 1  | -22 | -10 | 17.7800 | 3.06240 | 13 |
| -1 | -22 | 10  | 14.4009 | 2.46445 | 13 |
| -1 | 22  | 10  | 16.3231 | 2.94181 | 10 |
| 0  | 22  | 10  | 6.71069 | 2.08686 | 10 |
| -9 | 0   | 11  | 1.31366 | 1.75434 | 10 |



|    |    |     |         |         |    |
|----|----|-----|---------|---------|----|
| 9  | 0  | -11 | 3.39072 | 2.72118 | 13 |
| -8 | 0  | 11  | 18.3517 | 3.25140 | 10 |
| 8  | 0  | -11 | 14.3493 | 3.71569 | 13 |
| -7 | 0  | 11  | 7.29611 | 2.98267 | 10 |
| 7  | 0  | -11 | 8.42185 | 3.82702 | 13 |
| 6  | 0  | -11 | -0.2805 | 2.59613 | 13 |
| -6 | 0  | 11  | -0.1296 | 2.50358 | 10 |
| -5 | 0  | 11  | 15.4730 | 3.62139 | 10 |
| 5  | 0  | -11 | 11.5924 | 3.01424 | 13 |
| -4 | 0  | 11  | 12.9957 | 3.89752 | 10 |
| 3  | 0  | -11 | 1.97656 | 2.64454 | 10 |
| 1  | 0  | -11 | 42.0784 | 5.92230 | 10 |
| 0  | 0  | -11 | 353.620 | 23.0963 | 10 |
| 0  | 0  | 11  | 349.630 | 23.4509 | 13 |
| -1 | 0  | -11 | 0.43362 | 2.58828 | 1  |
| -1 | 0  | -11 | -1.7017 | 1.69961 | 8  |
| -1 | 0  | -11 | -3.4123 | 2.09867 | 10 |
| 1  | 0  | 11  | -5.1553 | 3.33047 | 13 |
| 2  | 0  | 11  | 5.80282 | 3.58832 | 13 |
| -2 | 0  | -11 | 6.91272 | 2.26782 | 10 |
| -2 | 0  | -11 | 6.73422 | 2.30862 | 8  |
| -3 | 0  | -11 | 6.93366 | 1.93405 | 8  |
| -3 | 0  | -11 | 5.83067 | 2.14517 | 10 |
| -3 | 0  | -11 | 8.51394 | 2.72504 | 12 |
| -4 | 0  | -11 | 11.6315 | 2.02156 | 8  |
| 4  | 0  | 11  | 13.1548 | 3.90321 | 13 |
| -4 | 0  | -11 | 10.5598 | 2.63431 | 12 |
| -5 | 0  | -11 | 4.41113 | 1.43594 | 8  |
| -5 | 0  | -11 | 3.74679 | 1.94834 | 12 |
| 5  | 0  | 11  | 2.12637 | 2.66738 | 13 |
| 6  | 0  | 11  | 21.7927 | 3.41236 | 13 |
| -9 | -1 | 11  | 4.68498 | 2.07986 | 10 |
| 9  | -1 | -11 | 7.83217 | 2.46286 | 13 |
| 9  | -1 | -11 | 6.03972 | 2.36920 | 13 |
| -9 | 1  | 11  | 7.91722 | 1.40875 | 11 |
| -9 | 1  | 11  | 7.28787 | 1.77057 | 10 |
| 9  | 1  | -11 | 4.28404 | 2.71652 | 13 |
| 8  | -1 | -11 | 17.7410 | 3.68439 | 13 |
| -8 | -1 | 11  | 10.5693 | 2.52769 | 10 |
| 8  | 1  | -11 | 16.6290 | 3.58724 | 13 |
| -8 | 1  | 11  | 15.0665 | 2.96168 | 10 |
| -7 | -1 | 11  | 7.64340 | 2.44898 | 10 |
| 7  | 1  | -11 | 5.70592 | 3.18248 | 13 |
| 6  | -1 | -11 | 7.27712 | 3.54153 | 13 |
| -6 | -1 | 11  | 2.30157 | 2.69146 | 10 |
| 6  | 1  | -11 | 3.77020 | 3.38130 | 13 |
| -6 | 1  | 11  | 5.93174 | 2.92707 | 10 |
| 5  | -1 | -11 | 3.06449 | 3.18446 | 13 |
| -5 | -1 | 11  | 1.11734 | 1.83068 | 10 |
| -5 | 1  | 11  | 5.17291 | 3.04934 | 10 |

|    |    |     |         |         |    |
|----|----|-----|---------|---------|----|
| -4 | 1  | 11  | 44.2713 | 6.23851 | 10 |
| 3  | 1  | -11 | 41.6145 | 5.36207 | 10 |
| 2  | -1 | -11 | 44.5374 | 5.65592 | 10 |
| 1  | -1 | -11 | 25.4356 | 4.67058 | 10 |
| 1  | 1  | -11 | 34.0304 | 4.72508 | 10 |
| 1  | 1  | -11 | 28.0328 | 3.83296 | 8  |
| 0  | -1 | -11 | 40.3243 | 5.02596 | 10 |
| 0  | -1 | 11  | 44.7463 | 6.16059 | 13 |
| 0  | 1  | 11  | 37.3800 | 5.45069 | 13 |
| 0  | 1  | -11 | 34.8353 | 4.21518 | 8  |
| 0  | 1  | -11 | 31.3830 | 4.61199 | 10 |
| -1 | -1 | -11 | 24.1885 | 4.19719 | 10 |
| -1 | -1 | -11 | 20.9835 | 3.24194 | 8  |
| -1 | -1 | -11 | 18.3490 | 4.38873 | 1  |
| 1  | -1 | 11  | 25.3410 | 4.64128 | 13 |
| -1 | 1  | -11 | 25.3317 | 3.85100 | 10 |
| -1 | 1  | -11 | 24.3156 | 3.30785 | 8  |
| -1 | 1  | -11 | 26.1779 | 4.67485 | 1  |
| 2  | -1 | 11  | -1.0664 | 3.27405 | 13 |
| -2 | -1 | -11 | 3.67987 | 1.83659 | 8  |
| -2 | -1 | -11 | 4.56945 | 2.18640 | 10 |
| -2 | 1  | -11 | -0.2847 | 1.60837 | 8  |
| -2 | 1  | -11 | 0.04419 | 2.03617 | 10 |
| 2  | 1  | 11  | 2.20098 | 2.83570 | 13 |
| 3  | -1 | 11  | 1.12659 | 2.79949 | 13 |
| -3 | -1 | -11 | 2.98069 | 1.84106 | 8  |
| -3 | -1 | -11 | 3.47554 | 2.13923 | 10 |
| -3 | 1  | -11 | -0.8090 | 2.34107 | 12 |
| -3 | 1  | -11 | 0.94035 | 1.63022 | 8  |
| -3 | 1  | -11 | -2.4177 | 2.38568 | 14 |
| 3  | 1  | 11  | 1.26529 | 2.97478 | 13 |
| -4 | -1 | -11 | 7.94367 | 2.45589 | 12 |
| -4 | -1 | -11 | 9.64741 | 2.03658 | 8  |
| 4  | -1 | 11  | 13.2087 | 3.81752 | 13 |
| -4 | 1  | -11 | 13.8983 | 1.52051 | 11 |
| -4 | 1  | -11 | 13.7413 | 2.72808 | 12 |
| -4 | 1  | -11 | 15.2693 | 2.28511 | 8  |
| 4  | 1  | 11  | 8.52005 | 3.35944 | 13 |
| 5  | -1 | 11  | -0.4085 | 2.40528 | 13 |
| -5 | -1 | -11 | 0.80184 | 1.42890 | 8  |
| -5 | -1 | -11 | -0.6387 | 1.79388 | 12 |
| -5 | 1  | -11 | 0.89128 | 1.86182 | 12 |
| -5 | 1  | -11 | 1.02617 | 1.12774 | 8  |
| 5  | 1  | 11  | 2.38260 | 2.66714 | 13 |
| 6  | 1  | 11  | 10.1868 | 2.25310 | 13 |
| -9 | -2 | 11  | 1.47126 | 1.70183 | 10 |
| 9  | -2 | -11 | 3.02695 | 2.26766 | 13 |
| 9  | -2 | -11 | 1.79703 | 2.32587 | 13 |
| -9 | 2  | 11  | 0.60597 | 0.86175 | 11 |
| 8  | -2 | -11 | 17.2356 | 3.61596 | 13 |

|    |    |     |         |         |    |
|----|----|-----|---------|---------|----|
| -8 | -2 | 11  | 21.4981 | 3.91996 | 10 |
| -8 | 2  | 11  | 17.2669 | 3.46446 | 10 |
| 8  | 2  | -11 | 21.4823 | 4.09433 | 13 |
| 8  | 2  | -11 | 21.6962 | 3.93723 | 13 |
| -7 | -2 | 11  | 35.7730 | 5.11487 | 10 |
| 7  | -2 | -11 | 31.6300 | 5.66279 | 13 |
| 7  | 2  | -11 | 38.3559 | 5.30798 | 13 |
| -7 | 2  | 11  | 24.5619 | 4.63671 | 10 |
| -6 | -2 | 11  | 16.4794 | 3.57398 | 10 |
| 6  | -2 | -11 | 9.26781 | 3.23679 | 13 |
| -6 | 2  | 11  | 12.8763 | 3.25038 | 10 |
| 5  | -2 | -11 | 20.5457 | 4.13640 | 13 |
| -5 | -2 | 11  | 28.5996 | 4.69084 | 10 |
| -5 | 2  | 11  | 15.3191 | 3.71218 | 10 |
| 4  | -2 | -11 | 28.3973 | 4.68653 | 13 |
| -4 | 2  | 11  | 34.1138 | 5.58438 | 10 |
| 4  | 2  | -11 | 39.2073 | 5.30714 | 10 |
| 3  | 2  | -11 | 9.76222 | 3.17207 | 10 |
| 2  | -2 | -11 | 29.8940 | 5.06322 | 10 |
| 1  | -2 | -11 | 18.2249 | 4.03065 | 10 |
| 1  | 2  | -11 | 17.1705 | 3.05218 | 8  |
| 1  | 2  | -11 | 18.0166 | 3.63340 | 10 |
| 0  | -2 | -11 | 29.4472 | 4.68841 | 10 |
| 0  | -2 | -11 | 29.4135 | 4.12306 | 8  |
| 0  | 2  | 11  | 27.2094 | 4.71892 | 13 |
| -1 | -2 | -11 | 39.2746 | 5.44568 | 10 |
| 1  | -2 | 11  | 46.4217 | 5.71426 | 13 |
| -1 | -2 | -11 | 36.1329 | 4.06222 | 8  |
| -1 | -2 | -11 | 37.5876 | 5.80208 | 1  |
| 1  | 2  | 11  | 33.5578 | 6.35465 | 13 |
| -1 | 2  | -11 | 37.0135 | 4.82805 | 10 |
| -1 | 2  | -11 | 35.6720 | 3.83425 | 8  |
| 2  | -2 | 11  | 9.25882 | 3.14139 | 13 |
| -2 | -2 | -11 | 9.63479 | 2.57376 | 8  |
| -2 | 2  | -11 | 10.1127 | 2.15038 | 8  |
| 2  | 2  | 11  | 7.95635 | 3.76982 | 13 |
| -2 | 2  | -11 | 8.97859 | 2.09730 | 10 |
| -3 | -2 | -11 | 16.6295 | 3.26566 | 10 |
| 3  | -2 | 11  | 12.5306 | 3.39093 | 13 |
| -3 | -2 | -11 | 13.1419 | 2.46329 | 8  |
| -3 | 2  | -11 | 18.8472 | 2.97595 | 8  |
| -3 | 2  | -11 | 21.8739 | 3.33208 | 12 |
| 3  | 2  | 11  | 9.44950 | 3.65361 | 13 |
| 4  | -2 | 11  | 5.39955 | 2.89901 | 13 |
| -4 | -2 | -11 | 5.46448 | 1.83562 | 8  |
| -4 | -2 | -11 | 2.26530 | 2.14911 | 12 |
| 4  | 2  | 11  | 4.73971 | 3.21655 | 13 |
| -4 | 2  | -11 | 8.43316 | 1.02504 | 11 |
| -4 | 2  | -11 | 6.80336 | 2.49657 | 12 |
| -4 | 2  | -11 | 6.73819 | 1.56034 | 8  |

|    |    |     |         |         |    |
|----|----|-----|---------|---------|----|
| 5  | -2 | 11  | 7.24390 | 3.11067 | 13 |
| -5 | -2 | -11 | 4.33561 | 1.91249 | 12 |
| -5 | -2 | -11 | 5.82294 | 1.47609 | 8  |
| 5  | 2  | 11  | 9.48346 | 2.90994 | 13 |
| -5 | 2  | -11 | 6.71168 | 1.25948 | 8  |
| -5 | 2  | -11 | 7.37528 | 2.14105 | 12 |
| 9  | -3 | -11 | 10.3806 | 2.69251 | 13 |
| -9 | -3 | 11  | 15.3493 | 2.66720 | 10 |
| -9 | 3  | 11  | 8.93230 | 1.35434 | 11 |
| -8 | -3 | 11  | 1.49832 | 2.37995 | 10 |
| 8  | -3 | -11 | 5.11341 | 3.06197 | 13 |
| -7 | -3 | 11  | 12.7536 | 3.54777 | 10 |
| 7  | -3 | -11 | 13.7247 | 4.22074 | 13 |
| -7 | 3  | 11  | 7.99791 | 2.97324 | 10 |
| -6 | -3 | 11  | 31.0689 | 5.28164 | 10 |
| 6  | -3 | -11 | 44.8961 | 5.88305 | 13 |
| -6 | 3  | 11  | 44.9337 | 5.31229 | 10 |
| 5  | -3 | -11 | 71.4444 | 7.68213 | 13 |
| -5 | -3 | 11  | 77.6603 | 7.63096 | 10 |
| -5 | 3  | 11  | 82.6939 | 7.65472 | 10 |
| 4  | -3 | -11 | 1.20974 | 2.97339 | 13 |
| -4 | 3  | 11  | 1.42660 | 2.93136 | 10 |
| 4  | 3  | -11 | 4.89453 | 2.94467 | 10 |
| -3 | 3  | 11  | 15.6402 | 4.04764 | 10 |
| 3  | 3  | -11 | 8.10770 | 3.10820 | 10 |
| 2  | -3 | -11 | 112.443 | 9.24013 | 10 |
| 2  | 3  | -11 | 114.002 | 9.12769 | 10 |
| 1  | -3 | -11 | 68.1068 | 7.11929 | 10 |
| 1  | 3  | -11 | 85.6202 | 6.97332 | 10 |
| 1  | 3  | -11 | 81.3634 | 6.30139 | 8  |
| 0  | -3 | 11  | 14.5294 | 4.02140 | 13 |
| 0  | 3  | -11 | 12.4319 | 2.69314 | 10 |
| 0  | 3  | -11 | 14.8155 | 2.58809 | 8  |
| -1 | -3 | -11 | 5.46650 | 3.27721 | 1  |
| -1 | -3 | -11 | 4.03867 | 2.49917 | 10 |
| -1 | -3 | -11 | 3.18657 | 1.92233 | 8  |
| 1  | -3 | 11  | 3.61002 | 3.44091 | 13 |
| -1 | 3  | -11 | 3.72756 | 1.72415 | 8  |
| 1  | 3  | 11  | 4.04287 | 3.03943 | 13 |
| -1 | 3  | -11 | 3.92595 | 1.93354 | 10 |
| -2 | -3 | -11 | 96.0341 | 7.96242 | 10 |
| -2 | -3 | -11 | 90.4238 | 8.67152 | 1  |
| -2 | -3 | -11 | 87.4970 | 7.31487 | 8  |
| 2  | -3 | 11  | 104.466 | 8.96095 | 13 |
| -2 | 3  | -11 | 98.1764 | 7.89839 | 14 |
| -2 | 3  | -11 | 105.483 | 7.88575 | 12 |
| -2 | 3  | -11 | 95.6130 | 7.14524 | 10 |
| 2  | 3  | 11  | 89.6211 | 9.09369 | 13 |
| -2 | 3  | -11 | 104.773 | 7.17135 | 8  |
| -3 | -3 | -11 | 54.2331 | 5.43274 | 10 |

|    |    |     |         |         |    |
|----|----|-----|---------|---------|----|
| 3  | -3 | 11  | 59.7377 | 6.39939 | 13 |
| -3 | -3 | -11 | 50.9117 | 4.98608 | 8  |
| -3 | 3  | -11 | 50.6015 | 5.59715 | 12 |
| -3 | 3  | -11 | 54.9133 | 4.86474 | 8  |
| -3 | 3  | -11 | 56.9767 | 5.85986 | 14 |
| -4 | -3 | -11 | 11.1713 | 2.20560 | 8  |
| -4 | -3 | -11 | 12.2847 | 2.39424 | 10 |
| 4  | -3 | 11  | 12.2995 | 3.11265 | 13 |
| -4 | -3 | -11 | 13.1003 | 2.57274 | 12 |
| -4 | 3  | -11 | 9.40850 | 2.67549 | 12 |
| 4  | 3  | 11  | 14.0010 | 3.69352 | 13 |
| -4 | 3  | -11 | 9.89857 | 1.82698 | 8  |
| 5  | -3 | 11  | 2.23021 | 2.20595 | 13 |
| -5 | 3  | -11 | 4.59804 | 1.95056 | 12 |
| -9 | -4 | 11  | 0.25323 | 1.22563 | 10 |
| 9  | -4 | -11 | 1.89815 | 2.32840 | 13 |
| -9 | 4  | 11  | 1.19768 | 0.77439 | 11 |
| 8  | -4 | -11 | 9.65343 | 3.19846 | 13 |
| -8 | 4  | 11  | 9.06818 | 2.27469 | 10 |
| -7 | -4 | 11  | 44.6051 | 5.04690 | 10 |
| 7  | -4 | -11 | 33.4075 | 5.94247 | 13 |
| -7 | 4  | 11  | 39.7719 | 5.09114 | 10 |
| -6 | -4 | 11  | 13.2580 | 3.50074 | 10 |
| 6  | -4 | -11 | 13.1886 | 3.30902 | 13 |
| -6 | 4  | 11  | 7.60241 | 2.79654 | 10 |
| 5  | -4 | -11 | 77.6283 | 7.17531 | 13 |
| -5 | -4 | 11  | 75.5394 | 10.5202 | 1  |
| -5 | 4  | 11  | 78.1533 | 7.59402 | 10 |
| -4 | -4 | 11  | 19.8282 | 6.90009 | 1  |
| -4 | 4  | 11  | 7.72198 | 3.51665 | 10 |
| 4  | 4  | -11 | 16.1197 | 3.81799 | 10 |
| -3 | -4 | 11  | 7.63041 | 3.58557 | 13 |
| 3  | 4  | -11 | 6.58363 | 2.79359 | 10 |
| 2  | -4 | -11 | 42.2680 | 5.32406 | 10 |
| 2  | 4  | -11 | 30.1825 | 4.70881 | 10 |
| -1 | -4 | 11  | 99.9184 | 8.75340 | 13 |
| 1  | -4 | -11 | 80.3978 | 8.52806 | 10 |
| 1  | 4  | -11 | 96.9393 | 8.14694 | 10 |
| 1  | 4  | -11 | 95.4820 | 7.13232 | 8  |
| 0  | -4 | -11 | 2.84815 | 3.29270 | 1  |
| 0  | -4 | -11 | 9.44822 | 3.39628 | 10 |
| 0  | 4  | -11 | 10.1341 | 3.10685 | 1  |
| -1 | -4 | -11 | 46.4222 | 5.30060 | 10 |
| 1  | -4 | 11  | 41.4441 | 6.70344 | 13 |
| -1 | -4 | -11 | 52.1144 | 5.14773 | 8  |
| -1 | -4 | -11 | 47.1358 | 7.41744 | 1  |
| -1 | 4  | -11 | 39.8995 | 4.11225 | 8  |
| 1  | 4  | 11  | 49.8622 | 6.92583 | 13 |
| -1 | 4  | -11 | 38.7843 | 4.59817 | 10 |
| 2  | -4 | 11  | 103.162 | 9.53271 | 13 |

|    |    |     |         |         |    |
|----|----|-----|---------|---------|----|
| -2 | -4 | -11 | 119.950 | 8.33297 | 8  |
| -2 | -4 | -11 | 111.328 | 10.0558 | 1  |
| -2 | -4 | -11 | 120.350 | 8.96858 | 10 |
| 2  | 4  | 11  | 108.022 | 9.95420 | 13 |
| -2 | 4  | -11 | 100.756 | 8.56901 | 14 |
| -2 | 4  | -11 | 109.551 | 8.00807 | 8  |
| -2 | 4  | -11 | 107.037 | 8.84112 | 12 |
| 3  | -4 | 11  | 62.0808 | 6.34613 | 13 |
| -3 | -4 | -11 | 45.5529 | 5.28926 | 10 |
| -3 | -4 | -11 | 53.5036 | 5.01810 | 8  |
| -3 | 4  | -11 | 58.0594 | 5.93014 | 14 |
| -3 | 4  | -11 | 38.6067 | 5.53573 | 12 |
| -3 | 4  | -11 | 54.1022 | 3.88897 | 11 |
| 3  | 4  | 11  | 60.2412 | 7.24579 | 13 |
| -3 | 4  | -11 | 48.3400 | 4.58367 | 8  |
| 4  | -4 | 11  | 8.63556 | 2.76641 | 13 |
| -4 | -4 | -11 | 8.47079 | 2.30326 | 12 |
| -4 | -4 | -11 | 9.32995 | 2.17492 | 8  |
| -4 | -4 | -11 | 8.72843 | 2.08660 | 10 |
| 4  | 4  | 11  | 10.4468 | 4.31718 | 13 |
| -4 | 4  | -11 | 10.7024 | 2.62753 | 12 |
| -4 | 4  | -11 | 7.78168 | 1.53775 | 8  |
| -5 | -4 | -11 | 3.87539 | 1.45699 | 8  |
| 5  | 4  | 11  | 3.22950 | 2.66770 | 13 |
| -9 | -5 | 11  | 6.17313 | 1.97763 | 10 |
| 9  | -5 | -11 | 4.81691 | 2.85972 | 13 |
| -9 | 5  | 11  | 4.03888 | 0.59362 | 11 |
| 8  | -5 | -11 | 21.6045 | 3.57870 | 13 |
| -8 | -5 | 11  | 13.5347 | 3.30923 | 10 |
| -8 | 5  | 11  | 19.1331 | 3.16507 | 10 |
| -7 | -5 | 11  | 70.5197 | 6.26422 | 10 |
| 7  | -5 | -11 | 54.9407 | 6.82452 | 13 |
| -7 | 5  | 11  | 58.0873 | 5.96791 | 10 |
| -6 | -5 | 11  | 4.04979 | 2.85616 | 10 |
| -6 | -5 | 11  | 3.09380 | 4.22493 | 1  |
| 6  | -5 | -11 | 8.86836 | 3.17074 | 13 |
| -6 | 5  | 11  | 7.99424 | 2.89873 | 10 |
| 5  | -5 | -11 | 37.6291 | 5.89643 | 13 |
| -5 | -5 | 11  | 39.1721 | 8.26681 | 1  |
| -5 | 5  | 11  | 41.0765 | 5.57365 | 10 |
| 5  | 5  | -11 | 40.4919 | 5.88620 | 10 |
| -4 | -5 | 11  | 14.5249 | 3.90072 | 13 |
| 4  | -5 | -11 | 18.8088 | 3.60872 | 13 |
| 4  | 5  | -11 | 15.4666 | 3.56283 | 10 |
| -4 | 5  | 11  | 19.7392 | 4.02788 | 10 |
| 3  | -5 | -11 | 100.566 | 7.40960 | 13 |
| -3 | -5 | 11  | 68.9472 | 7.86577 | 13 |
| 3  | 5  | -11 | 77.6805 | 7.73914 | 10 |
| -3 | 5  | 11  | 96.3305 | 8.76562 | 10 |
| -2 | -5 | 11  | 5.42242 | 3.53928 | 13 |

|    |    |     |         |         |    |
|----|----|-----|---------|---------|----|
| 2  | 5  | -11 | 5.98642 | 2.54565 | 10 |
| 1  | -5 | -11 | 80.3225 | 7.99304 | 10 |
| -1 | -5 | 11  | 100.617 | 8.21631 | 13 |
| 1  | 5  | -11 | 90.3613 | 7.82429 | 10 |
| 0  | -5 | 11  | 30.4118 | 4.87016 | 13 |
| 0  | 5  | -11 | 29.4836 | 3.48122 | 8  |
| 0  | 5  | -11 | 30.3822 | 4.04877 | 10 |
| 1  | -5 | 11  | 21.0687 | 3.80660 | 13 |
| -1 | 5  | -11 | 22.2893 | 3.09818 | 8  |
| -1 | 5  | -11 | 22.1460 | 3.55242 | 10 |
| -1 | 5  | -11 | 23.3810 | 3.72873 | 12 |
| 1  | 5  | 11  | 35.0840 | 5.58341 | 13 |
| -1 | 5  | -11 | 24.5939 | 3.91004 | 14 |
| 2  | -5 | 11  | 17.5494 | 3.56245 | 13 |
| -2 | -5 | -11 | 24.5675 | 3.64275 | 8  |
| -2 | -5 | -11 | 25.7388 | 4.26158 | 10 |
| -2 | -5 | -11 | 26.2243 | 5.51072 | 1  |
| -2 | 5  | -11 | 18.3471 | 3.18201 | 14 |
| -2 | 5  | -11 | 18.5802 | 3.15881 | 8  |
| -2 | 5  | -11 | 21.9268 | 3.64273 | 12 |
| 2  | 5  | 11  | 20.9310 | 4.00701 | 13 |
| -2 | 5  | -11 | 20.5868 | 2.93278 | 11 |
| -3 | -5 | -11 | 18.4971 | 2.82213 | 8  |
| -3 | -5 | -11 | 15.6627 | 3.05787 | 10 |
| -3 | 5  | -11 | 14.6941 | 2.37531 | 8  |
| -3 | 5  | -11 | 11.8842 | 1.72562 | 11 |
| -3 | 5  | -11 | 17.2560 | 3.32508 | 14 |
| -3 | 5  | -11 | 14.6573 | 1.84365 | 11 |
| 3  | 5  | 11  | 28.8754 | 5.22025 | 13 |
| -3 | 5  | -11 | 18.3987 | 3.34941 | 12 |
| -4 | -5 | -11 | 3.61030 | 2.06262 | 12 |
| -4 | -5 | -11 | 6.54559 | 1.65173 | 8  |
| -4 | -5 | -11 | 3.53687 | 1.90037 | 10 |
| -4 | 5  | -11 | 2.93010 | 2.31639 | 12 |
| 4  | 5  | 11  | 7.45813 | 3.56012 | 13 |
| -5 | -5 | -11 | 43.4718 | 3.75893 | 8  |
| -5 | 5  | -11 | 40.5818 | 4.40506 | 12 |
| 5  | 5  | 11  | 46.3514 | 5.39658 | 13 |
| -9 | -6 | 11  | 20.6144 | 3.04687 | 10 |
| 9  | -6 | -11 | 20.1475 | 3.79460 | 13 |
| -8 | -6 | 11  | 3.29682 | 2.60454 | 10 |
| -8 | 6  | 11  | 4.64776 | 2.10414 | 10 |
| -8 | 6  | 11  | 0.49123 | 1.16554 | 11 |
| -7 | -6 | 11  | 10.5834 | 3.34213 | 10 |
| 7  | -6 | -11 | 13.8640 | 3.55192 | 13 |
| -7 | 6  | 11  | 15.0815 | 2.97456 | 10 |
| -6 | -6 | 11  | 53.8056 | 8.65699 | 1  |
| -6 | -6 | 11  | 40.9128 | 6.03661 | 10 |
| -6 | 6  | 11  | 42.3145 | 5.49376 | 10 |
| 5  | -6 | -11 | 0.96642 | 2.50862 | 13 |

|    |    |     |         |         |    |
|----|----|-----|---------|---------|----|
| -5 | -6 | 11  | 4.18344 | 4.19072 | 1  |
| -5 | 6  | 11  | 2.27530 | 2.70254 | 10 |
| 5  | 6  | -11 | 3.80054 | 3.02589 | 10 |
| 4  | -6 | -11 | 11.1870 | 2.82801 | 13 |
| -4 | -6 | 11  | 13.6622 | 3.27737 | 13 |
| 4  | 6  | -11 | 10.2704 | 3.23023 | 10 |
| -4 | 6  | 11  | 15.5188 | 3.85941 | 10 |
| -3 | -6 | 11  | 41.2052 | 6.43283 | 13 |
| 3  | -6 | -11 | 34.7917 | 4.76326 | 13 |
| 3  | 6  | -11 | 28.2992 | 5.10068 | 10 |
| -3 | 6  | 11  | 36.6539 | 5.86729 | 10 |
| -2 | -6 | 11  | 47.7448 | 6.81153 | 13 |
| -2 | 6  | 11  | 33.1270 | 6.16015 | 10 |
| 1  | -6 | -11 | 103.770 | 8.93691 | 10 |
| -1 | -6 | 11  | 101.089 | 8.96344 | 13 |
| 1  | 6  | -11 | 96.5438 | 8.06209 | 10 |
| 1  | 6  | -11 | 101.047 | 7.98129 | 14 |
| 0  | -6 | -11 | 29.6581 | 4.99371 | 10 |
| 0  | -6 | -11 | 33.5336 | 6.61592 | 1  |
| 0  | -6 | 11  | 25.4787 | 4.12372 | 13 |
| 0  | 6  | -11 | 23.6484 | 4.16292 | 10 |
| 0  | 6  | -11 | 20.3520 | 3.50179 | 14 |
| 0  | 6  | 11  | 34.1232 | 6.32177 | 13 |
| -1 | -6 | -11 | 29.9390 | 5.91611 | 1  |
| -1 | -6 | -11 | 29.7636 | 4.82460 | 10 |
| -1 | 6  | -11 | 30.1493 | 3.67074 | 10 |
| 1  | 6  | 11  | 27.9768 | 4.50135 | 13 |
| -1 | 6  | -11 | 29.2996 | 3.33310 | 8  |
| -1 | 6  | -11 | 21.3244 | 3.53455 | 14 |
| -1 | 6  | -11 | 23.7488 | 4.00808 | 12 |
| -2 | -6 | -11 | 145.908 | 12.6296 | 1  |
| -2 | -6 | -11 | 143.643 | 10.9498 | 10 |
| 2  | -6 | 11  | 149.147 | 12.0792 | 13 |
| -2 | -6 | -11 | 144.105 | 10.2792 | 8  |
| -2 | 6  | -11 | 141.636 | 10.4629 | 14 |
| 2  | 6  | 11  | 141.622 | 11.3341 | 13 |
| -2 | 6  | -11 | 138.919 | 9.67963 | 8  |
| -2 | 6  | -11 | 148.071 | 10.7688 | 12 |
| -2 | 6  | -11 | 141.977 | 9.33990 | 11 |
| -3 | -6 | -11 | 11.4157 | 2.58387 | 8  |
| -3 | -6 | -11 | 11.8578 | 2.96077 | 10 |
| 3  | 6  | 11  | 11.3775 | 3.85628 | 13 |
| -3 | 6  | -11 | 15.0006 | 3.62414 | 14 |
| -3 | 6  | -11 | 14.7460 | 2.98452 | 12 |
| -4 | -6 | -11 | 16.5176 | 2.88956 | 12 |
| -4 | -6 | -11 | 21.6103 | 2.95266 | 8  |
| -4 | -6 | -11 | 17.5692 | 3.39591 | 10 |
| -4 | 6  | -11 | 24.4107 | 4.01776 | 12 |
| -5 | -6 | -11 | 11.9768 | 1.88601 | 8  |
| -5 | 6  | -11 | 6.28497 | 2.19057 | 12 |



|    |    |     |         |         |    |
|----|----|-----|---------|---------|----|
| 5  | 6  | 11  | 9.24015 | 2.88440 | 13 |
| -5 | 6  | -11 | 10.3133 | 1.95014 | 9  |
| 8  | -7 | -11 | 25.3466 | 3.71442 | 13 |
| -8 | -7 | 11  | 21.0975 | 4.06662 | 10 |
| -8 | 7  | 11  | 22.1186 | 2.21603 | 11 |
| 7  | -7 | -11 | 10.2655 | 3.37016 | 13 |
| -7 | -7 | 11  | 8.79219 | 3.18504 | 10 |
| -7 | 7  | 11  | 14.1611 | 2.72181 | 10 |
| 6  | -7 | -11 | 7.59552 | 3.88443 | 13 |
| -6 | -7 | 11  | 16.0594 | 6.92869 | 1  |
| -6 | 7  | 11  | 5.33303 | 2.81713 | 10 |
| 5  | -7 | -11 | 4.88141 | 3.23254 | 13 |
| -5 | -7 | 11  | 7.24046 | 4.67258 | 1  |
| -5 | 7  | 11  | 6.06843 | 3.00164 | 10 |
| 5  | 7  | -11 | 2.99190 | 3.05376 | 10 |
| -4 | -7 | 11  | 7.02506 | 3.44195 | 13 |
| 4  | -7 | -11 | -0.4555 | 3.00763 | 13 |
| -4 | 7  | 11  | -1.7807 | 2.77076 | 10 |
| 4  | 7  | -11 | 7.26857 | 3.19607 | 10 |
| 3  | -7 | -11 | 48.9068 | 6.23756 | 13 |
| -3 | -7 | 11  | 33.7717 | 6.47681 | 13 |
| -3 | 7  | 11  | 48.5226 | 6.29843 | 10 |
| -2 | -7 | 11  | 70.1811 | 6.95986 | 13 |
| 2  | 7  | -11 | 68.3056 | 6.46873 | 10 |
| -2 | 7  | 11  | 68.5738 | 7.74761 | 10 |
| -1 | -7 | 11  | 118.077 | 9.61425 | 13 |
| 1  | 7  | -11 | 109.588 | 8.44694 | 10 |
| 1  | 7  | -11 | 97.9812 | 8.37532 | 14 |
| 0  | -7 | -11 | 115.440 | 11.8679 | 1  |
| 0  | -7 | -11 | 109.878 | 9.50147 | 10 |
| 0  | -7 | 11  | 109.841 | 9.55124 | 13 |
| 0  | 7  | -11 | 121.340 | 8.77234 | 10 |
| 0  | 7  | 11  | 116.487 | 9.99449 | 13 |
| 0  | 7  | -11 | 119.076 | 8.84635 | 14 |
| -1 | -7 | -11 | 94.2389 | 8.30509 | 10 |
| -1 | -7 | -11 | 86.1113 | 10.1489 | 1  |
| 1  | -7 | 11  | 93.9449 | 8.75949 | 13 |
| -1 | 7  | -11 | 98.8077 | 6.82370 | 11 |
| -1 | 7  | -11 | 100.356 | 7.72885 | 14 |
| -1 | 7  | -11 | 102.129 | 7.84468 | 12 |
| 1  | 7  | 11  | 84.0818 | 8.53607 | 13 |
| -2 | -7 | -11 | 160.217 | 11.5637 | 10 |
| -2 | -7 | -11 | 155.703 | 13.1139 | 1  |
| -2 | 7  | -11 | 158.174 | 9.95479 | 11 |
| -2 | 7  | -11 | 152.135 | 10.9855 | 12 |
| 2  | 7  | 11  | 148.830 | 11.8070 | 13 |
| -2 | 7  | -11 | 147.225 | 9.69077 | 11 |
| -2 | 7  | -11 | 143.065 | 10.9686 | 14 |
| -3 | -7 | -11 | -1.4113 | 2.31222 | 10 |
| -3 | -7 | -11 | 1.98620 | 2.06417 | 8  |

|    |    |     |         |         |    |
|----|----|-----|---------|---------|----|
| 3  | 7  | 11  | -1.4790 | 3.77483 | 13 |
| -3 | 7  | -11 | 0.99768 | 2.23381 | 12 |
| -3 | 7  | -11 | 3.03122 | 2.57859 | 14 |
| -4 | -7 | -11 | 8.98805 | 3.76459 | 12 |
| 4  | 7  | 11  | 7.06966 | 3.36983 | 13 |
| -4 | 7  | -11 | 3.97302 | 2.33721 | 12 |
| -5 | -7 | -11 | 2.82092 | 1.52131 | 8  |
| -5 | 7  | -11 | 1.72910 | 1.63835 | 9  |
| 5  | 7  | 11  | -0.1307 | 2.37086 | 13 |
| -5 | 7  | -11 | 2.69746 | 1.87691 | 12 |
| 8  | -8 | -11 | 25.0907 | 4.67647 | 13 |
| -8 | -8 | 11  | 36.0999 | 3.90509 | 10 |
| -8 | 8  | 11  | 28.7710 | 2.37932 | 11 |
| 7  | -8 | -11 | 81.9770 | 7.84942 | 13 |
| -7 | -8 | 11  | 80.8384 | 7.22788 | 10 |
| -7 | 8  | 11  | 81.0461 | 6.86431 | 10 |
| 6  | -8 | -11 | 5.07227 | 3.73677 | 13 |
| 6  | 8  | -11 | 2.99536 | 3.05940 | 10 |
| -6 | 8  | 11  | 1.22434 | 2.37463 | 10 |
| 5  | -8 | -11 | 4.85283 | 3.33049 | 13 |
| -5 | 8  | 11  | 1.36161 | 2.83764 | 10 |
| 5  | 8  | -11 | 3.44249 | 2.97321 | 10 |
| -4 | -8 | 11  | 9.03876 | 3.02790 | 13 |
| 4  | -8 | -11 | 8.93106 | 3.42322 | 13 |
| 4  | 8  | -11 | 11.2737 | 2.80755 | 10 |
| -4 | 8  | 11  | 9.68684 | 3.35617 | 10 |
| -3 | -8 | 11  | 42.7481 | 6.32077 | 13 |
| 3  | -8 | -11 | 31.5459 | 4.88011 | 13 |
| -3 | 8  | 11  | 31.4500 | 5.51834 | 10 |
| 3  | 8  | -11 | 19.7424 | 3.86952 | 10 |
| -2 | -8 | 11  | 24.0139 | 4.43310 | 13 |
| 2  | 8  | -11 | 22.9179 | 3.90697 | 10 |
| -1 | -8 | 11  | 263.133 | 18.4468 | 13 |
| 1  | 8  | -11 | 270.260 | 17.7785 | 14 |
| 1  | 8  | -11 | 274.183 | 17.9454 | 10 |
| 0  | -8 | -11 | 44.2393 | 7.51054 | 1  |
| 0  | -8 | 11  | 28.5546 | 5.19392 | 13 |
| 0  | 8  | -11 | 28.8452 | 4.23629 | 14 |
| 0  | 8  | -11 | 25.1726 | 3.87788 | 10 |
| 1  | -8 | 11  | 121.682 | 10.1884 | 13 |
| -1 | -8 | -11 | 157.613 | 13.7869 | 1  |
| -1 | -8 | -11 | 148.490 | 10.7181 | 10 |
| -1 | 8  | -11 | 126.226 | 9.66877 | 12 |
| -1 | 8  | -11 | 124.137 | 10.1358 | 14 |
| -1 | 8  | -11 | 124.907 | 8.78007 | 11 |
| 1  | 8  | 11  | 138.993 | 10.6781 | 13 |
| -2 | -8 | -11 | 28.8535 | 5.89993 | 1  |
| -2 | -8 | -11 | 23.6306 | 4.65407 | 10 |
| -2 | 8  | -11 | 28.8179 | 2.28464 | 11 |
| -2 | 8  | -11 | 27.7535 | 2.28008 | 11 |

|    |    |     |         |         |    |
|----|----|-----|---------|---------|----|
| -2 | 8  | -11 | 26.6275 | 4.18748 | 12 |
| 2  | 8  | 11  | 24.0444 | 4.36070 | 13 |
| -2 | 8  | -11 | 33.1105 | 4.29102 | 14 |
| -3 | -8 | -11 | 13.9701 | 2.80120 | 8  |
| -3 | -8 | -11 | 12.0652 | 3.27407 | 10 |
| -3 | 8  | -11 | 17.9273 | 3.39903 | 14 |
| -3 | 8  | -11 | 17.7938 | 3.04597 | 12 |
| 3  | 8  | 11  | 12.2731 | 3.80841 | 13 |
| -4 | -8 | -11 | 48.5535 | 4.47175 | 8  |
| -4 | -8 | -11 | 44.9706 | 4.49692 | 10 |
| 4  | 8  | 11  | 41.2599 | 5.83496 | 13 |
| -4 | 8  | -11 | 37.2258 | 4.13806 | 12 |
| 5  | 8  | 11  | 8.10050 | 2.46143 | 13 |
| -5 | 8  | -11 | 7.00444 | 2.01339 | 12 |
| 8  | -9 | -11 | 29.5154 | 4.44532 | 13 |
| -8 | 9  | 11  | 27.0133 | 2.07608 | 11 |
| -8 | 9  | 11  | 28.6982 | 2.11582 | 11 |
| 7  | -9 | -11 | 55.8504 | 6.45805 | 13 |
| -7 | -9 | 11  | 55.6316 | 6.19989 | 10 |
| -7 | 9  | 11  | 58.2835 | 4.90626 | 10 |
| 6  | -9 | -11 | 10.2889 | 3.23104 | 13 |
| 6  | 9  | -11 | 3.14200 | 2.24070 | 10 |
| -6 | 9  | 11  | 6.71531 | 2.55584 | 10 |
| -5 | 9  | 11  | 30.0982 | 4.91022 | 10 |
| 5  | 9  | -11 | 20.1548 | 4.03803 | 10 |
| 4  | -9 | -11 | 24.7195 | 4.20289 | 13 |
| -4 | -9 | 11  | 14.2800 | 3.34198 | 13 |
| -4 | 9  | 11  | 22.7795 | 4.25280 | 10 |
| 4  | 9  | -11 | 13.4853 | 3.58350 | 10 |
| 3  | -9 | -11 | 42.5773 | 5.70775 | 13 |
| -3 | -9 | 11  | 49.3136 | 6.00406 | 13 |
| -3 | 9  | 11  | 40.5436 | 6.16521 | 10 |
| 3  | 9  | -11 | 49.3388 | 5.64050 | 10 |
| -2 | -9 | 11  | 46.8277 | 5.79866 | 13 |
| 2  | -9 | -11 | 29.8304 | 4.57206 | 13 |
| -2 | 9  | 11  | 32.2318 | 5.85905 | 10 |
| 1  | -9 | -11 | 3.27334 | 4.04053 | 1  |
| -1 | -9 | 11  | 2.08089 | 3.30782 | 13 |
| 1  | 9  | -11 | 8.21084 | 2.94816 | 14 |
| 1  | 9  | -11 | 2.71358 | 2.51340 | 10 |
| -1 | 9  | 11  | 3.77091 | 3.83099 | 10 |
| 0  | -9 | 11  | 42.7911 | 6.42924 | 13 |
| 0  | 9  | -11 | 35.4990 | 4.75513 | 14 |
| 0  | 9  | -11 | 39.1061 | 4.35004 | 10 |
| -1 | 9  | -11 | 8.66462 | 1.56131 | 11 |
| -1 | 9  | -11 | 6.90092 | 2.37508 | 12 |
| -1 | 9  | -11 | 7.90769 | 2.60339 | 14 |
| -2 | -9 | -11 | 31.5007 | 6.27815 | 1  |
| -2 | -9 | -11 | 41.8032 | 5.34498 | 10 |
| 2  | 9  | 11  | 28.9289 | 5.28782 | 13 |

|    |     |     |         |         |    |
|----|-----|-----|---------|---------|----|
| -2 | 9   | -11 | 29.5487 | 4.05794 | 12 |
| -2 | 9   | -11 | 32.7532 | 5.17215 | 14 |
| -3 | -9  | -11 | 31.9186 | 3.96462 | 10 |
| 3  | 9   | 11  | 30.8741 | 5.52210 | 13 |
| -3 | 9   | -11 | 38.4180 | 5.13250 | 14 |
| -3 | 9   | -11 | 28.7898 | 4.31502 | 12 |
| -4 | -9  | -11 | 10.5501 | 1.91689 | 8  |
| -4 | -9  | -11 | 9.82756 | 2.46102 | 10 |
| 4  | 9   | 11  | 12.8186 | 3.07632 | 13 |
| -4 | 9   | -11 | 8.35973 | 2.98804 | 14 |
| -4 | 9   | -11 | 8.64465 | 2.05590 | 12 |
| -4 | 9   | -11 | 7.81268 | 0.92223 | 6  |
| -4 | 9   | -11 | 8.57184 | 1.27811 | 9  |
| 5  | 9   | 11  | 0.98591 | 2.00190 | 13 |
| -5 | 9   | -11 | 2.65921 | 1.75204 | 12 |
| 8  | -10 | -11 | 2.87201 | 2.28745 | 13 |
| 7  | -10 | -11 | 17.8888 | 3.51356 | 13 |
| -7 | 10  | 11  | 20.7447 | 2.33554 | 11 |
| 6  | 10  | -11 | 10.6482 | 3.46941 | 10 |
| 5  | -10 | -11 | -2.8557 | 3.61853 | 13 |
| 5  | 10  | -11 | 0.53469 | 3.16710 | 10 |
| -5 | 10  | 11  | 0.94167 | 2.63844 | 10 |
| 4  | -10 | -11 | 10.9309 | 3.26684 | 13 |
| -4 | -10 | 11  | 11.2443 | 3.63965 | 13 |
| -4 | 10  | 11  | 14.8283 | 3.71820 | 10 |
| 4  | 10  | -11 | 9.87062 | 3.23549 | 10 |
| 3  | -10 | -11 | 39.1795 | 6.31877 | 13 |
| -3 | -10 | 11  | 37.2040 | 6.44977 | 13 |
| 3  | 10  | -11 | 40.0257 | 5.22472 | 10 |
| -3 | 10  | 11  | 43.9208 | 6.11806 | 10 |
| -2 | -10 | 11  | 145.675 | 10.7810 | 13 |
| 2  | -10 | -11 | 129.969 | 10.4408 | 13 |
| 2  | 10  | -11 | 141.167 | 10.4325 | 10 |
| -2 | 10  | 11  | 138.416 | 11.5534 | 10 |
| 1  | -10 | -11 | 205.739 | 18.0043 | 1  |
| -1 | -10 | 11  | 206.951 | 14.7874 | 13 |
| 1  | 10  | -11 | 217.205 | 14.3267 | 10 |
| 1  | 10  | -11 | 214.796 | 14.5759 | 14 |
| -1 | 10  | 11  | 204.050 | 15.8303 | 10 |
| 0  | -10 | 11  | 46.1706 | 5.81071 | 13 |
| 0  | 10  | -11 | 50.3050 | 6.02995 | 14 |
| 0  | 10  | -11 | 52.6989 | 4.28885 | 11 |
| -1 | -10 | -11 | 36.5693 | 5.72229 | 10 |
| -1 | -10 | -11 | 36.6347 | 7.28715 | 1  |
| -1 | 10  | -11 | 53.6427 | 5.59283 | 14 |
| -1 | 10  | -11 | 54.5531 | 4.26771 | 11 |
| -1 | 10  | -11 | 49.7573 | 3.77546 | 11 |
| -1 | 10  | -11 | 51.5887 | 4.90050 | 12 |
| -2 | -10 | -11 | 188.023 | 13.0403 | 10 |
| -2 | 10  | -11 | 176.310 | 12.6090 | 14 |

|    |     |     |         |         |    |
|----|-----|-----|---------|---------|----|
| -2 | 10  | -11 | 164.684 | 12.2367 | 12 |
| -3 | -10 | -11 | 10.5904 | 3.04600 | 10 |
| -3 | 10  | -11 | 8.35182 | 2.16034 | 12 |
| -3 | 10  | -11 | 11.1055 | 2.98473 | 14 |
| 3  | 10  | 11  | 10.4132 | 3.83078 | 13 |
| -4 | -10 | -11 | 3.04324 | 1.89629 | 8  |
| -4 | -10 | -11 | 2.23432 | 2.08349 | 10 |
| -4 | 10  | -11 | 6.41157 | 2.33360 | 14 |
| -4 | 10  | -11 | 4.97609 | 1.76653 | 12 |
| -4 | 10  | -11 | 3.66569 | 0.97525 | 9  |
| -4 | 10  | -11 | 5.23516 | 0.63695 | 6  |
| 4  | 10  | 11  | 0.10766 | 3.06571 | 13 |
| -5 | 10  | -11 | 12.4435 | 2.16201 | 12 |
| -8 | -11 | 11  | 35.7413 | 4.50912 | 10 |
| 8  | -11 | -11 | 37.9419 | 4.31902 | 13 |
| 7  | -11 | -11 | 32.2619 | 4.95580 | 13 |
| 7  | 11  | -11 | 31.3758 | 4.33642 | 10 |
| -7 | 11  | 11  | 32.0539 | 2.83781 | 11 |
| 6  | -11 | -11 | 8.99585 | 3.30991 | 13 |
| -6 | 11  | 11  | 8.88101 | 2.62318 | 10 |
| 6  | 11  | -11 | 15.4100 | 3.71690 | 10 |
| 5  | -11 | -11 | 13.4367 | 3.59109 | 13 |
| 5  | 11  | -11 | 11.1901 | 2.85895 | 10 |
| -5 | 11  | 11  | 10.6058 | 3.12722 | 10 |
| 4  | -11 | -11 | 16.8609 | 4.02952 | 13 |
| -4 | -11 | 11  | 8.54697 | 3.02893 | 13 |
| 4  | 11  | -11 | 7.00234 | 3.11653 | 10 |
| -4 | 11  | 11  | 13.6862 | 3.63690 | 10 |
| -3 | -11 | 11  | 29.1131 | 5.39455 | 13 |
| 3  | -11 | -11 | 37.5785 | 5.41639 | 13 |
| 3  | 11  | -11 | 30.7740 | 4.76917 | 10 |
| -3 | 11  | 11  | 33.6192 | 5.70292 | 10 |
| 2  | -11 | -11 | 37.2035 | 6.01399 | 13 |
| -2 | -11 | 11  | 40.9575 | 5.57875 | 13 |
| 2  | 11  | -11 | 45.2754 | 4.85463 | 10 |
| -2 | 11  | 11  | 34.9310 | 6.07126 | 10 |
| -1 | -11 | 11  | 194.523 | 14.0876 | 13 |
| 1  | -11 | -11 | 185.448 | 18.4254 | 1  |
| -1 | 11  | 11  | 166.380 | 14.5919 | 10 |
| 1  | 11  | -11 | 206.099 | 13.2977 | 10 |
| 1  | 11  | -11 | 203.270 | 13.4546 | 14 |
| 0  | -11 | 11  | 218.034 | 15.9881 | 13 |
| 0  | 11  | -11 | 227.179 | 15.7952 | 14 |
| 0  | 11  | -11 | 252.609 | 14.9361 | 11 |
| -1 | -11 | -11 | 81.9351 | 10.6310 | 1  |
| -1 | 11  | -11 | 89.1032 | 8.16547 | 14 |
| -1 | 11  | -11 | 103.906 | 6.30842 | 11 |
| -1 | 11  | -11 | 100.853 | 6.27185 | 11 |
| -2 | 11  | -11 | 15.0424 | 2.91205 | 12 |
| -2 | 11  | -11 | 13.3673 | 3.16873 | 14 |

|    |     |     |         |         |    |
|----|-----|-----|---------|---------|----|
| -3 | 11  | -11 | 20.0261 | 3.35977 | 12 |
| -3 | 11  | -11 | 23.3811 | 3.67940 | 14 |
| -3 | 11  | -11 | 24.2898 | 2.49115 | 9  |
| -4 | -11 | -11 | 3.27315 | 1.61304 | 10 |
| -4 | 11  | -11 | 1.14973 | 2.03355 | 14 |
| -4 | 11  | -11 | 1.33140 | 1.95517 | 12 |
| -4 | 11  | -11 | 1.27485 | 0.96622 | 9  |
| 8  | -12 | -11 | 9.25484 | 2.23113 | 13 |
| 7  | -12 | -11 | 48.7005 | 5.24221 | 13 |
| 7  | 12  | -11 | 47.1121 | 4.98832 | 10 |
| -7 | 12  | 11  | 47.5325 | 3.34199 | 11 |
| -7 | 12  | 11  | 49.9386 | 3.40408 | 11 |
| 6  | -12 | -11 | 8.98228 | 3.31819 | 13 |
| -6 | 12  | 11  | 5.42904 | 2.22948 | 10 |
| 5  | -12 | -11 | 33.0019 | 5.71841 | 13 |
| -5 | 12  | 11  | 35.1386 | 4.79042 | 10 |
| -4 | -12 | 11  | 4.14640 | 2.97825 | 13 |
| 4  | -12 | -11 | 2.20344 | 3.79725 | 13 |
| 4  | 12  | -11 | 3.34649 | 2.79251 | 10 |
| -4 | 12  | 11  | 2.31264 | 2.94568 | 10 |
| -3 | -12 | 11  | 14.3575 | 3.42575 | 13 |
| 3  | -12 | -11 | 14.4197 | 3.27465 | 13 |
| 3  | 12  | -11 | 7.78134 | 2.86182 | 10 |
| -3 | 12  | 11  | 10.5284 | 3.78970 | 10 |
| 2  | -12 | -11 | 18.5621 | 3.50198 | 13 |
| -2 | 12  | 11  | 24.7831 | 4.64342 | 10 |
| -1 | -12 | 11  | 79.6059 | 7.38103 | 13 |
| 1  | 12  | -11 | 79.8582 | 7.22413 | 14 |
| 1  | 12  | -11 | 75.6948 | 6.40545 | 10 |
| 0  | -12 | 11  | 34.2363 | 5.07204 | 13 |
| 0  | 12  | -11 | 36.0828 | 3.64316 | 11 |
| 0  | 12  | 11  | 53.7636 | 6.82498 | 10 |
| 0  | 12  | -11 | 48.4698 | 5.58772 | 14 |
| -1 | -12 | -11 | 113.662 | 8.87593 | 10 |
| -1 | 12  | -11 | 98.5760 | 8.74486 | 14 |
| -2 | -12 | -11 | 4.95721 | 2.92099 | 10 |
| -2 | 12  | -11 | 4.46097 | 2.74564 | 12 |
| -2 | 12  | -11 | 2.95134 | 2.54818 | 14 |
| -3 | -12 | -11 | 11.8090 | 3.00675 | 10 |
| -3 | 12  | -11 | 12.0004 | 1.13883 | 6  |
| -3 | 12  | -11 | 15.2467 | 3.04493 | 14 |
| -3 | 12  | -11 | 11.0439 | 1.45936 | 9  |
| -3 | 12  | -11 | 12.8147 | 2.70516 | 12 |
| -4 | -12 | -11 | 7.56825 | 2.26215 | 10 |
| -4 | 12  | -11 | 13.5821 | 2.58903 | 14 |
| -4 | 12  | -11 | 8.82200 | 2.19412 | 12 |
| -4 | 12  | -11 | 6.81840 | 0.94858 | 9  |
| 7  | -13 | -11 | 10.3605 | 2.52038 | 13 |
| 7  | 13  | -11 | 4.72937 | 2.18951 | 10 |
| 6  | -13 | -11 | 27.4860 | 4.79160 | 13 |

|    |     |     |         |         |    |
|----|-----|-----|---------|---------|----|
| -6 | 13  | 11  | 26.1746 | 2.71134 | 11 |
| 5  | -13 | -11 | 106.791 | 8.21990 | 13 |
| -5 | -13 | 11  | 73.2087 | 7.22880 | 13 |
| -5 | 13  | 11  | 105.927 | 7.58891 | 10 |
| 5  | 13  | -11 | 74.4654 | 7.27688 | 10 |
| -4 | -13 | 11  | 26.8880 | 4.95330 | 13 |
| 4  | -13 | -11 | 31.4005 | 5.45033 | 13 |
| -4 | 13  | 11  | 26.5223 | 4.75640 | 10 |
| 4  | 13  | -11 | 23.2059 | 4.02660 | 10 |
| -3 | -13 | 11  | 11.3584 | 3.51597 | 13 |
| 3  | 13  | -11 | 11.9338 | 3.10402 | 10 |
| 2  | -13 | -11 | 17.6852 | 3.49170 | 13 |
| -2 | -13 | 11  | 28.4930 | 4.91800 | 13 |
| -2 | 13  | 11  | 16.1400 | 4.36800 | 10 |
| -1 | -13 | 11  | 14.3237 | 3.27066 | 13 |
| 1  | 13  | -11 | 16.2070 | 3.30315 | 14 |
| 1  | 13  | -11 | 16.2951 | 2.39307 | 11 |
| -1 | 13  | 11  | 12.7726 | 4.36296 | 10 |
| 0  | -13 | -11 | 40.9176 | 8.29827 | 1  |
| 0  | -13 | 11  | 45.5824 | 6.56462 | 13 |
| 0  | 13  | -11 | 64.3776 | 7.05831 | 14 |
| 0  | 13  | -11 | 54.8198 | 4.57934 | 11 |
| 0  | 13  | -11 | 53.5296 | 4.17413 | 11 |
| 0  | 13  | 11  | 49.7044 | 7.35860 | 10 |
| -1 | -13 | -11 | 57.0245 | 6.72237 | 10 |
| -1 | 13  | -11 | 74.3481 | 6.66466 | 14 |
| -2 | -13 | -11 | 0.58266 | 2.72468 | 10 |
| -3 | -13 | -11 | 9.50521 | 2.86397 | 10 |
| -3 | 13  | -11 | 3.92042 | 2.55043 | 14 |
| -3 | 13  | -11 | 5.52778 | 2.25043 | 12 |
| -3 | 13  | -11 | 4.10949 | 0.74969 | 6  |
| -3 | 13  | -11 | 4.70585 | 1.04472 | 9  |
| -4 | -13 | -11 | 12.4161 | 2.39997 | 10 |
| -4 | 13  | -11 | 12.8771 | 2.25322 | 12 |
| -4 | 13  | -11 | 10.8433 | 2.12998 | 14 |
| 7  | -14 | -11 | 9.17677 | 2.31381 | 13 |
| 7  | 14  | -11 | 7.03401 | 2.76073 | 10 |
| 6  | -14 | -11 | 17.0177 | 3.31826 | 13 |
| -6 | 14  | 11  | 18.2307 | 2.06421 | 11 |
| 6  | 14  | -11 | 21.4170 | 3.66379 | 10 |
| -5 | -14 | 11  | 4.96164 | 2.91178 | 13 |
| 5  | -14 | -11 | 1.02122 | 3.75192 | 13 |
| -5 | 14  | 11  | 2.27089 | 2.03608 | 10 |
| 5  | 14  | -11 | 10.7548 | 3.20015 | 10 |
| 4  | -14 | -11 | 40.6665 | 5.51464 | 13 |
| -4 | 14  | 11  | 39.9104 | 5.25807 | 10 |
| 4  | 14  | -11 | 38.9329 | 5.21427 | 10 |
| 3  | -14 | -11 | 1.17375 | 3.59086 | 13 |
| -3 | -14 | 11  | 2.87238 | 3.41276 | 13 |
| 3  | 14  | -11 | -0.0226 | 2.33748 | 10 |

|    |     |     |         |         |    |
|----|-----|-----|---------|---------|----|
| -3 | 14  | 11  | 2.48473 | 2.97163 | 10 |
| -2 | -14 | 11  | 28.1588 | 5.31558 | 13 |
| 2  | -14 | -11 | 23.8038 | 3.92063 | 13 |
| 2  | 14  | -11 | 25.0924 | 3.71239 | 10 |
| -2 | 14  | 11  | 17.9848 | 4.47123 | 10 |
| -1 | -14 | 11  | 48.5545 | 5.71895 | 13 |
| 1  | 14  | -11 | 48.3842 | 4.37074 | 11 |
| 1  | 14  | -11 | 48.2051 | 5.79316 | 14 |
| 0  | -14 | 11  | 53.5155 | 5.74763 | 13 |
| 0  | 14  | -11 | 54.5160 | 3.77019 | 11 |
| 0  | 14  | -11 | 56.0124 | 3.84730 | 11 |
| 0  | 14  | -11 | 55.1693 | 6.03067 | 14 |
| -1 | -14 | -11 | 14.7797 | 3.07293 | 10 |
| 1  | 14  | 11  | 11.9519 | 3.33824 | 10 |
| -1 | 14  | -11 | 9.04867 | 2.96384 | 14 |
| -2 | 14  | -11 | 18.9533 | 2.97397 | 12 |
| -2 | 14  | -11 | 20.2966 | 3.35483 | 14 |
| -3 | -14 | -11 | 0.06769 | 2.30179 | 10 |
| -3 | 14  | -11 | 3.72371 | 1.88836 | 12 |
| -3 | 14  | -11 | 2.17024 | 0.94366 | 9  |
| -3 | 14  | -11 | 2.36180 | 0.63071 | 6  |
| -3 | 14  | -11 | 3.97755 | 2.25614 | 14 |
| -4 | -14 | -11 | 8.37841 | 2.11999 | 10 |
| -4 | 14  | -11 | 8.69495 | 1.97164 | 12 |
| 7  | -15 | -11 | 2.98693 | 1.91398 | 13 |
| 7  | 15  | -11 | 1.86836 | 2.74808 | 10 |
| 6  | -15 | -11 | 1.39868 | 2.18922 | 13 |
| -6 | 15  | 11  | 0.74991 | 0.71534 | 11 |
| -6 | 15  | 11  | 0.08557 | 0.78974 | 11 |
| 6  | 15  | -11 | 0.35804 | 2.65546 | 10 |
| -5 | -15 | 11  | 20.2375 | 3.44729 | 13 |
| 5  | -15 | -11 | 24.6910 | 4.30671 | 13 |
| 5  | 15  | -11 | 19.7374 | 3.47236 | 10 |
| -5 | 15  | 11  | 17.4506 | 3.16152 | 10 |
| -4 | -15 | 11  | 6.63218 | 2.71937 | 13 |
| 4  | -15 | -11 | 13.0333 | 3.42989 | 13 |
| 4  | 15  | -11 | 5.29560 | 2.70945 | 10 |
| -4 | 15  | 11  | 11.5549 | 2.94649 | 10 |
| 3  | -15 | -11 | 2.05469 | 3.10871 | 13 |
| -3 | -15 | 11  | 2.73809 | 2.93177 | 13 |
| -3 | 15  | 11  | 3.95092 | 2.94055 | 10 |
| 3  | 15  | -11 | -0.2477 | 2.33786 | 10 |
| 2  | -15 | -11 | 16.0352 | 3.95592 | 13 |
| -2 | -15 | 11  | 4.66501 | 3.44996 | 13 |
| 2  | 15  | -11 | 6.80380 | 2.10137 | 10 |
| -2 | 15  | 11  | 14.2860 | 3.77048 | 10 |
| -1 | -15 | 11  | 116.415 | 9.63746 | 13 |
| -1 | 15  | 11  | 113.308 | 10.2682 | 10 |
| 0  | -15 | 11  | 19.7309 | 3.32725 | 13 |
| 0  | 15  | -11 | 31.2900 | 4.91287 | 14 |



|    |     |     |         |         |    |
|----|-----|-----|---------|---------|----|
| 0  | 15  | 11  | 25.6384 | 4.88640 | 10 |
| -1 | 15  | -11 | 44.3490 | 5.61835 | 14 |
| -2 | -15 | -11 | 0.67741 | 1.91257 | 10 |
| -2 | 15  | -11 | 1.00124 | 0.54919 | 6  |
| -2 | 15  | -11 | 1.53750 | 0.98836 | 9  |
| -2 | 15  | -11 | 0.70016 | 2.43948 | 14 |
| -3 | -15 | -11 | 12.4512 | 2.75826 | 10 |
| -3 | 15  | -11 | 10.9505 | 2.43610 | 12 |
| -3 | 15  | -11 | 11.4446 | 1.32385 | 9  |
| -3 | 15  | -11 | 12.1342 | 2.54914 | 14 |
| 6  | -16 | -11 | 0.85876 | 2.40808 | 13 |
| 6  | 16  | -11 | -0.3045 | 2.38046 | 10 |
| 5  | -16 | -11 | 9.68908 | 3.02524 | 13 |
| -5 | -16 | 11  | 18.0953 | 3.38739 | 13 |
| 5  | 16  | -11 | 20.7518 | 3.55922 | 10 |
| -5 | 16  | 11  | 14.0584 | 2.13075 | 11 |
| -4 | -16 | 11  | -1.6626 | 2.36735 | 13 |
| 4  | -16 | -11 | -1.2281 | 2.78377 | 13 |
| 4  | 16  | -11 | 0.78701 | 2.45569 | 10 |
| -4 | 16  | 11  | 0.04897 | 2.15994 | 10 |
| -3 | -16 | 11  | 11.6751 | 3.16607 | 13 |
| 3  | -16 | -11 | 12.5557 | 3.67047 | 13 |
| 3  | 16  | -11 | 14.3634 | 2.73351 | 10 |
| -3 | 16  | 11  | 10.8119 | 3.09990 | 10 |
| 2  | -16 | -11 | 8.28664 | 2.92787 | 13 |
| -2 | -16 | 11  | 2.71300 | 2.57478 | 13 |
| 2  | 16  | -11 | 6.20755 | 1.87705 | 11 |
| -2 | 16  | 11  | 9.64692 | 3.41215 | 10 |
| -1 | -16 | 11  | -1.8939 | 2.24325 | 13 |
| -1 | 16  | 11  | 2.19808 | 3.44469 | 10 |
| 1  | 16  | -11 | 0.59087 | 1.16053 | 11 |
| 1  | 16  | -11 | 1.00578 | 1.19394 | 11 |
| 1  | 16  | -11 | 3.61265 | 2.68204 | 14 |
| 0  | -16 | 11  | 16.6351 | 3.01465 | 13 |
| 0  | 16  | -11 | 12.8866 | 3.28196 | 14 |
| 1  | 16  | 11  | 70.6141 | 7.32558 | 10 |
| -1 | 16  | -11 | 60.3597 | 6.21647 | 14 |
| -2 | -16 | -11 | 1.43380 | 1.83548 | 10 |
| -2 | 16  | -11 | 0.21296 | 2.30590 | 14 |
| -2 | 16  | -11 | -0.0534 | 0.82368 | 9  |
| -3 | -16 | -11 | 8.65676 | 2.38255 | 10 |
| -3 | 16  | -11 | 3.36999 | 1.57696 | 12 |
| -3 | 16  | -11 | 4.57298 | 2.04601 | 14 |
| 6  | -17 | -11 | 0.17000 | 1.76509 | 13 |
| 6  | 17  | -11 | 1.69089 | 2.17453 | 10 |
| 5  | -17 | -11 | 19.3787 | 3.18821 | 13 |
| -5 | -17 | 11  | 25.3900 | 3.91220 | 13 |
| 5  | 17  | -11 | 22.2389 | 3.08079 | 10 |
| -5 | 17  | 11  | 20.1785 | 2.12379 | 11 |
| -4 | -17 | 11  | 2.93712 | 2.31212 | 13 |

|    |     |     |         |         |    |
|----|-----|-----|---------|---------|----|
| 4  | -17 | -11 | 4.84743 | 2.77238 | 13 |
| -4 | 17  | 11  | 6.17654 | 2.37479 | 10 |
| 4  | 17  | -11 | 3.41979 | 2.32328 | 10 |
| -3 | -17 | 11  | 18.8694 | 3.23670 | 13 |
| 3  | -17 | -11 | 15.7919 | 3.26967 | 13 |
| -3 | 17  | 11  | 14.9085 | 3.20829 | 10 |
| 3  | 17  | -11 | 17.9663 | 3.04960 | 10 |
| -2 | -17 | 11  | 7.89541 | 3.05657 | 13 |
| 2  | -17 | -11 | 14.6059 | 3.30793 | 13 |
| 2  | 17  | -11 | 15.3329 | 2.05082 | 11 |
| -2 | 17  | 11  | 17.2216 | 3.84135 | 10 |
| -1 | -17 | 11  | -0.3884 | 2.34276 | 13 |
| -1 | 17  | 11  | -2.0945 | 2.22577 | 10 |
| 0  | -17 | 11  | 6.00570 | 2.71856 | 13 |
| 0  | 17  | -11 | 7.00975 | 2.84116 | 14 |
| 0  | 17  | 11  | 7.64013 | 2.73795 | 10 |
| 1  | 17  | 11  | 14.7022 | 3.14558 | 10 |
| -1 | 17  | -11 | 13.8832 | 3.04919 | 14 |
| -2 | -17 | -11 | 2.91208 | 1.69927 | 10 |
| -2 | 17  | -11 | 1.68515 | 0.92448 | 9  |
| -2 | 17  | -11 | 1.22312 | 2.11747 | 14 |
| 2  | 17  | 11  | 5.11085 | 2.97097 | 10 |
| -3 | 17  | -11 | 2.58391 | 2.15173 | 14 |
| 5  | -18 | -11 | 13.2512 | 2.43219 | 13 |
| 5  | 18  | -11 | 11.0953 | 2.34590 | 10 |
| -5 | 18  | 11  | 9.07879 | 0.74540 | 11 |
| -5 | 18  | 11  | 9.32339 | 0.72345 | 11 |
| -4 | -18 | 11  | 8.99896 | 2.37589 | 13 |
| 4  | -18 | -11 | 8.83569 | 2.72404 | 13 |
| 4  | 18  | -11 | 8.67953 | 2.47306 | 10 |
| -4 | 18  | 11  | 12.6554 | 1.58836 | 11 |
| -3 | -18 | 11  | 10.0917 | 2.63971 | 13 |
| 3  | -18 | -11 | 9.91886 | 2.88266 | 13 |
| 3  | 18  | -11 | 7.67227 | 1.86084 | 11 |
| -2 | -18 | 11  | 10.0728 | 2.71712 | 13 |
| 2  | 18  | -11 | 10.0759 | 1.51407 | 11 |
| -2 | 18  | 11  | 9.71883 | 2.58306 | 10 |
| 2  | 18  | -11 | 9.49567 | 1.61174 | 11 |
| -1 | -18 | 11  | 2.01589 | 2.11064 | 13 |
| 1  | 18  | -11 | 3.29196 | 2.33043 | 14 |
| -1 | 18  | 11  | 1.55951 | 2.11116 | 10 |
| 0  | -18 | 11  | 4.29917 | 2.12922 | 13 |
| 0  | 18  | 11  | 14.0710 | 3.75668 | 10 |
| 0  | 18  | -11 | 6.77346 | 2.64087 | 14 |
| -1 | 18  | -11 | 28.2047 | 4.15281 | 14 |
| 1  | 18  | 11  | 28.2785 | 4.78957 | 10 |
| -2 | 18  | -11 | 3.52575 | 2.04818 | 14 |
| 5  | -19 | -11 | 7.08404 | 2.32792 | 13 |
| -4 | -19 | 11  | 0.09676 | 2.05556 | 13 |
| 4  | -19 | -11 | 0.22481 | 1.90240 | 13 |

|    |     |     |         |         |    |
|----|-----|-----|---------|---------|----|
| 4  | 19  | -11 | -0.3423 | 1.49252 | 11 |
| -4 | 19  | 11  | 0.79287 | 0.91745 | 11 |
| -3 | -19 | 11  | 2.97015 | 2.08298 | 13 |
| 3  | -19 | -11 | 1.26416 | 2.18771 | 13 |
| 3  | 19  | -11 | 1.98716 | 1.45581 | 11 |
| -3 | 19  | 11  | 1.67608 | 1.74109 | 10 |
| 2  | -19 | -11 | 2.60299 | 2.54677 | 13 |
| -2 | -19 | 11  | -0.1302 | 1.95827 | 13 |
| -2 | 19  | 11  | 1.29713 | 2.15496 | 10 |
| -1 | -19 | 11  | 12.7136 | 2.43465 | 13 |
| -1 | 19  | 11  | 10.0963 | 2.47522 | 10 |
| 0  | -19 | 11  | -0.8342 | 1.62965 | 13 |
| 0  | 19  | -11 | 0.83006 | 2.00835 | 14 |
| 0  | 19  | 11  | 0.80004 | 2.67911 | 10 |
| 1  | 19  | 11  | 7.04164 | 2.91022 | 10 |
| -1 | 19  | -11 | 12.8239 | 2.38297 | 14 |
| -4 | -20 | 11  | 5.30955 | 2.06041 | 13 |
| 4  | -20 | -11 | 4.18063 | 1.89910 | 13 |
| -3 | -20 | 11  | 23.4498 | 3.40607 | 13 |
| 3  | -20 | -11 | 14.4528 | 2.56413 | 13 |
| -3 | 20  | 11  | 16.1465 | 2.05273 | 11 |
| 2  | -20 | -11 | 9.97143 | 2.56122 | 13 |
| -2 | -20 | 11  | 13.1938 | 2.35207 | 13 |
| -2 | 20  | 11  | 10.9491 | 2.62689 | 10 |
| -1 | -20 | 11  | 3.92362 | 1.78221 | 13 |
| -1 | 20  | 11  | 3.60253 | 2.24577 | 10 |
| 0  | -20 | 11  | 0.92068 | 1.76301 | 13 |
| 0  | 20  | 11  | 1.36454 | 2.12788 | 10 |
| 3  | -21 | -11 | 4.15690 | 2.05920 | 13 |
| -3 | -21 | 11  | 2.33964 | 2.01780 | 13 |
| -2 | -21 | 11  | 41.0911 | 4.06878 | 13 |
| -1 | -21 | 11  | 6.12887 | 1.73319 | 13 |
| -8 | 0   | 12  | 36.3069 | 4.26360 | 10 |
| 8  | 0   | -12 | 30.6170 | 5.24569 | 13 |
| 7  | 0   | -12 | 0.05595 | 2.82413 | 13 |
| -7 | 0   | 12  | 0.36199 | 1.82660 | 10 |
| -6 | 0   | 12  | 4.94081 | 3.13422 | 10 |
| -5 | 0   | 12  | 48.5917 | 6.10010 | 10 |
| 3  | 0   | -12 | 0.53094 | 2.64013 | 10 |
| -2 | 0   | 12  | 80.4282 | 8.28926 | 13 |
| 2  | 0   | -12 | 78.5137 | 7.30984 | 10 |
| 1  | 0   | -12 | 93.7999 | 7.89532 | 10 |
| 1  | 0   | -12 | 92.4939 | 9.31828 | 8  |
| -1 | 0   | 12  | 87.9730 | 8.34149 | 13 |
| 0  | 0   | 12  | 635.778 | 41.3552 | 13 |
| 0  | 0   | -12 | 664.547 | 41.2744 | 10 |
| 0  | 0   | -12 | 651.041 | 42.8137 | 1  |
| 0  | 0   | -12 | 654.320 | 40.6657 | 8  |
| -1 | 0   | -12 | 5.93413 | 2.08851 | 8  |
| -1 | 0   | -12 | 5.33245 | 2.39001 | 10 |

|    |    |     |         |         |    |
|----|----|-----|---------|---------|----|
| 1  | 0  | 12  | 3.50818 | 3.08255 | 13 |
| -2 | 0  | -12 | -1.8049 | 1.90556 | 8  |
| 2  | 0  | 12  | -1.3591 | 3.72137 | 13 |
| -2 | 0  | -12 | -0.8686 | 2.32692 | 10 |
| -3 | 0  | -12 | 31.1995 | 4.60283 | 14 |
| -3 | 0  | -12 | 22.2475 | 3.49187 | 12 |
| 3  | 0  | 12  | 22.2291 | 4.01984 | 13 |
| -3 | 0  | -12 | 25.5802 | 3.33667 | 8  |
| 4  | 0  | 12  | 7.20232 | 2.85137 | 13 |
| -4 | 0  | -12 | 2.19078 | 1.33597 | 8  |
| -4 | 0  | -12 | 4.73706 | 2.14837 | 12 |
| -5 | 0  | -12 | 1.99337 | 1.47830 | 12 |
| 5  | 0  | 12  | 1.98830 | 2.02682 | 13 |
| 8  | -1 | -12 | 24.1556 | 4.40402 | 13 |
| -8 | -1 | 12  | 14.2997 | 3.06077 | 10 |
| -8 | 1  | 12  | 22.8987 | 3.45893 | 10 |
| 7  | -1 | -12 | 26.0923 | 4.09264 | 13 |
| -7 | 1  | 12  | 24.8612 | 3.69084 | 10 |
| -6 | -1 | 12  | 19.6979 | 4.01061 | 10 |
| 6  | -1 | -12 | 14.3624 | 4.06460 | 13 |
| -6 | 1  | 12  | 19.6551 | 3.61825 | 10 |
| -5 | -1 | 12  | 50.7011 | 6.20654 | 10 |
| -5 | 1  | 12  | 50.1567 | 6.26356 | 10 |
| -4 | 1  | 12  | 11.9211 | 3.50504 | 10 |
| 4  | 1  | -12 | 7.10842 | 3.15452 | 10 |
| -3 | -1 | 12  | 67.8274 | 6.80731 | 13 |
| 3  | -1 | -12 | 65.5508 | 6.95541 | 10 |
| 3  | 1  | -12 | 75.4507 | 7.08350 | 10 |
| -2 | -1 | 12  | 113.761 | 10.2433 | 13 |
| 2  | -1 | -12 | 138.446 | 10.1337 | 10 |
| 2  | 1  | -12 | 114.635 | 9.83895 | 10 |
| -2 | 1  | 12  | 138.589 | 10.6319 | 13 |
| -1 | -1 | 12  | 202.772 | 15.2931 | 13 |
| 1  | -1 | -12 | 228.797 | 15.0315 | 10 |
| 1  | 1  | -12 | 199.736 | 14.0915 | 8  |
| 1  | 1  | -12 | 193.295 | 14.5309 | 10 |
| -1 | 1  | 12  | 224.880 | 15.3726 | 13 |
| 0  | -1 | -12 | 157.753 | 12.6515 | 1  |
| 0  | -1 | 12  | 120.264 | 10.8209 | 13 |
| 0  | -1 | -12 | 143.917 | 10.5318 | 10 |
| 0  | -1 | -12 | 148.912 | 9.92809 | 8  |
| 0  | 1  | 12  | 146.277 | 11.2147 | 13 |
| 0  | 1  | -12 | 125.720 | 11.2533 | 1  |
| 0  | 1  | -12 | 124.605 | 10.2117 | 10 |
| 0  | 1  | -12 | 133.341 | 9.80903 | 8  |
| -1 | -1 | -12 | 36.1524 | 4.15017 | 8  |
| -1 | -1 | -12 | 38.4747 | 5.39429 | 1  |
| 1  | -1 | 12  | 38.6358 | 6.83854 | 13 |
| -1 | -1 | -12 | 33.4860 | 4.51131 | 10 |
| 1  | 1  | 12  | 33.0173 | 5.70775 | 13 |

|    |    |     |         |         |    |
|----|----|-----|---------|---------|----|
| -1 | 1  | -12 | 28.6687 | 4.23655 | 8  |
| -1 | 1  | -12 | 29.7581 | 4.09254 | 10 |
| -2 | -1 | -12 | 9.93374 | 2.45869 | 8  |
| -2 | 1  | -12 | 9.86020 | 2.44575 | 8  |
| -2 | 1  | -12 | 13.9688 | 2.82362 | 10 |
| 2  | 1  | 12  | 17.6115 | 3.98336 | 13 |
| -3 | -1 | -12 | 8.56395 | 2.59511 | 12 |
| 3  | -1 | 12  | 5.09229 | 3.03001 | 13 |
| -3 | -1 | -12 | 6.38713 | 2.00359 | 8  |
| -3 | -1 | -12 | 9.37049 | 2.76781 | 14 |
| -3 | -1 | -12 | 6.09510 | 1.76109 | 10 |
| 3  | 1  | 12  | 8.29887 | 3.24900 | 13 |
| -3 | 1  | -12 | 2.64080 | 2.47766 | 14 |
| -3 | 1  | -12 | 4.06100 | 1.70556 | 8  |
| -3 | 1  | -12 | 1.07025 | 2.35740 | 12 |
| -4 | -1 | -12 | 30.5289 | 4.05425 | 12 |
| -4 | -1 | -12 | 31.6102 | 2.73174 | 11 |
| 4  | -1 | 12  | 40.7995 | 5.25183 | 13 |
| -4 | -1 | -12 | 31.3419 | 3.21396 | 8  |
| -4 | 1  | -12 | 33.0655 | 3.05301 | 8  |
| -4 | 1  | -12 | 33.7848 | 4.21995 | 12 |
| 4  | 1  | 12  | 33.0108 | 5.19922 | 13 |
| -5 | -1 | -12 | 0.75714 | 1.40835 | 12 |
| 5  | -1 | 12  | 4.29593 | 2.05645 | 13 |
| 5  | 1  | 12  | 1.16362 | 2.04096 | 13 |
| -5 | 1  | -12 | 3.27963 | 1.51273 | 12 |
| 8  | -2 | -12 | 12.2762 | 3.41642 | 13 |
| -8 | -2 | 12  | 4.88110 | 2.51756 | 10 |
| -8 | 2  | 12  | 10.3730 | 2.45566 | 10 |
| -7 | -2 | 12  | 32.4530 | 4.22135 | 10 |
| 7  | -2 | -12 | 27.9151 | 5.38045 | 13 |
| -7 | 2  | 12  | 35.5801 | 4.15203 | 10 |
| -6 | -2 | 12  | 2.40212 | 2.17968 | 10 |
| 6  | -2 | -12 | 0.94915 | 2.91174 | 13 |
| -6 | 2  | 12  | 0.91365 | 2.77350 | 10 |
| -5 | -2 | 12  | 4.07310 | 2.89745 | 10 |
| -5 | 2  | 12  | -0.7281 | 2.67240 | 10 |
| -4 | 2  | 12  | 34.2053 | 5.59688 | 10 |
| 4  | 2  | -12 | 30.8902 | 5.08625 | 10 |
| -3 | -2 | 12  | 39.5813 | 6.41795 | 13 |
| 3  | -2 | -12 | 55.8485 | 6.00793 | 10 |
| 3  | 2  | -12 | 44.1418 | 5.74707 | 10 |
| -2 | -2 | 12  | 29.7084 | 5.16224 | 13 |
| 2  | 2  | -12 | 31.7262 | 4.81179 | 10 |
| 1  | -2 | -12 | 62.7461 | 6.66853 | 10 |
| -1 | -2 | 12  | 71.3252 | 7.83180 | 13 |
| 1  | 2  | -12 | 71.5949 | 6.54230 | 10 |
| -1 | 2  | 12  | 64.7634 | 7.11166 | 13 |
| 1  | 2  | -12 | 71.8448 | 5.99329 | 8  |
| 0  | -2 | -12 | 10.3396 | 2.44600 | 8  |

|    |    |     |         |         |    |
|----|----|-----|---------|---------|----|
| 0  | -2 | -12 | 12.4677 | 3.18942 | 10 |
| 0  | -2 | -12 | 12.5111 | 4.56729 | 1  |
| 0  | -2 | 12  | 6.13847 | 3.26358 | 13 |
| 0  | 2  | 12  | 8.91172 | 3.50036 | 13 |
| 0  | 2  | -12 | 10.9757 | 3.36859 | 1  |
| 0  | 2  | -12 | 7.95531 | 2.63904 | 10 |
| 0  | 2  | -12 | 9.24710 | 2.39121 | 8  |
| -1 | -2 | -12 | 5.69193 | 3.26303 | 1  |
| -1 | -2 | -12 | 6.78499 | 2.69443 | 10 |
| -1 | -2 | -12 | 8.48810 | 2.31054 | 8  |
| 1  | -2 | 12  | 2.52001 | 3.02849 | 13 |
| 1  | 2  | 12  | 9.37519 | 4.05181 | 13 |
| -1 | 2  | -12 | 3.04051 | 1.96330 | 8  |
| -1 | 2  | -12 | 2.47299 | 1.97414 | 10 |
| 2  | -2 | 12  | 6.37950 | 3.29134 | 13 |
| -2 | -2 | -12 | 5.41437 | 2.42567 | 10 |
| -2 | -2 | -12 | 1.67712 | 2.07411 | 8  |
| 2  | 2  | 12  | 9.75345 | 4.20254 | 13 |
| -2 | 2  | -12 | 6.62149 | 2.07582 | 8  |
| -2 | 2  | -12 | 0.12640 | 2.84802 | 14 |
| -2 | 2  | -12 | 6.67048 | 2.74664 | 12 |
| -2 | 2  | -12 | 8.86316 | 2.10831 | 10 |
| -3 | -2 | -12 | 0.32193 | 1.74066 | 8  |
| -3 | -2 | -12 | -1.3426 | 1.55809 | 10 |
| 3  | -2 | 12  | 0.13866 | 2.60525 | 13 |
| -3 | -2 | -12 | 1.51716 | 2.21292 | 12 |
| -3 | 2  | -12 | -0.8263 | 2.30069 | 14 |
| 3  | 2  | 12  | -0.1698 | 3.66426 | 13 |
| -3 | 2  | -12 | -0.1144 | 1.44478 | 8  |
| -3 | 2  | -12 | 0.43723 | 2.23950 | 12 |
| -4 | -2 | -12 | 6.14990 | 2.12614 | 12 |
| 4  | -2 | 12  | 0.89974 | 2.36437 | 13 |
| -4 | -2 | -12 | 4.16124 | 1.61834 | 8  |
| 4  | 2  | 12  | 4.46237 | 2.88095 | 13 |
| -4 | 2  | -12 | 2.17687 | 1.12443 | 8  |
| -4 | 2  | -12 | 5.72626 | 2.16457 | 12 |
| 5  | -2 | 12  | 19.1630 | 3.48369 | 13 |
| 5  | 2  | 12  | 14.9673 | 3.00280 | 13 |
| -5 | 2  | -12 | 17.5560 | 2.65673 | 12 |
| 8  | -3 | -12 | 2.98440 | 2.60771 | 13 |
| -8 | -3 | 12  | 6.84523 | 2.06588 | 10 |
| -8 | 3  | 12  | 6.24004 | 2.09045 | 10 |
| 7  | -3 | -12 | 37.1963 | 5.77074 | 13 |
| -7 | -3 | 12  | 45.0812 | 5.62332 | 10 |
| -7 | 3  | 12  | 45.9989 | 5.27887 | 10 |
| 6  | -3 | -12 | 7.73488 | 3.09348 | 13 |
| -6 | 3  | 12  | 4.84868 | 2.88309 | 10 |
| 5  | -3 | -12 | 23.8772 | 3.83353 | 13 |
| -5 | 3  | 12  | 26.5343 | 4.94802 | 10 |
| -4 | 3  | 12  | 15.7419 | 4.07496 | 10 |

|    |    |     |         |         |    |
|----|----|-----|---------|---------|----|
| 4  | 3  | -12 | 22.2848 | 3.94432 | 10 |
| -3 | -3 | 12  | 2.81757 | 3.46200 | 13 |
| 3  | 3  | -12 | 0.40147 | 2.62202 | 10 |
| -2 | -3 | 12  | 42.1367 | 6.47116 | 13 |
| 2  | 3  | -12 | 48.2755 | 5.49719 | 10 |
| 1  | -3 | -12 | 60.5255 | 6.08411 | 10 |
| -1 | -3 | 12  | 38.2550 | 5.87288 | 13 |
| 1  | 3  | -12 | 45.1813 | 5.35361 | 10 |
| -1 | 3  | 12  | 57.9090 | 6.93629 | 13 |
| 0  | -3 | -12 | 169.438 | 14.8921 | 1  |
| 0  | -3 | -12 | 161.826 | 13.3842 | 10 |
| 0  | -3 | 12  | 190.937 | 13.9110 | 13 |
| 0  | 3  | 12  | 156.801 | 13.2697 | 13 |
| 0  | 3  | -12 | 206.377 | 12.4870 | 8  |
| 0  | 3  | -12 | 198.221 | 12.8989 | 10 |
| 1  | -3 | 12  | 69.0056 | 8.00997 | 13 |
| -1 | -3 | -12 | 76.7440 | 6.90726 | 10 |
| -1 | -3 | -12 | 77.3303 | 7.91326 | 1  |
| 1  | 3  | 12  | 72.2145 | 8.39935 | 13 |
| -1 | 3  | -12 | 65.5731 | 5.90048 | 10 |
| -1 | 3  | -12 | 66.6729 | 5.78543 | 8  |
| -2 | -3 | -12 | 16.8115 | 3.10068 | 10 |
| 2  | -3 | 12  | 13.0378 | 4.09504 | 13 |
| -2 | -3 | -12 | 13.4797 | 2.59311 | 8  |
| -2 | 3  | -12 | 6.59076 | 2.90321 | 14 |
| -2 | 3  | -12 | 9.24976 | 2.22136 | 8  |
| 2  | 3  | 12  | 17.6965 | 4.63570 | 13 |
| -2 | 3  | -12 | 9.91604 | 2.96456 | 12 |
| -3 | -3 | -12 | 9.80885 | 2.21070 | 10 |
| 3  | -3 | 12  | 7.78393 | 2.94712 | 13 |
| -3 | -3 | -12 | 10.7954 | 2.25749 | 8  |
| 3  | 3  | 12  | 8.30458 | 4.09183 | 13 |
| -3 | 3  | -12 | 7.19504 | 1.35433 | 11 |
| -3 | 3  | -12 | 8.65929 | 1.19246 | 11 |
| -3 | 3  | -12 | 9.01267 | 2.04711 | 8  |
| -3 | 3  | -12 | 7.50803 | 2.61539 | 12 |
| -3 | 3  | -12 | 8.15880 | 2.74186 | 14 |
| 4  | -3 | 12  | 5.41401 | 2.58810 | 13 |
| -4 | -3 | -12 | 3.95699 | 1.73473 | 8  |
| -4 | -3 | -12 | 2.48446 | 2.00368 | 12 |
| -4 | 3  | -12 | 7.11868 | 1.37641 | 8  |
| -4 | 3  | -12 | 7.66045 | 2.35202 | 12 |
| 4  | 3  | 12  | 7.17659 | 3.04968 | 13 |
| 5  | -3 | 12  | 1.29828 | 1.78459 | 13 |
| -5 | 3  | -12 | 2.99466 | 1.63324 | 12 |
| 5  | 3  | 12  | 1.98956 | 2.05419 | 13 |
| -8 | -4 | 12  | 11.4256 | 2.81969 | 10 |
| 8  | -4 | -12 | 7.62581 | 3.25348 | 13 |
| -8 | 4  | 12  | 8.38961 | 2.09053 | 10 |
| 7  | -4 | -12 | 12.1809 | 3.48276 | 13 |

|    |    |     |         |         |    |
|----|----|-----|---------|---------|----|
| -7 | 4  | 12  | 5.41816 | 2.77462 | 10 |
| 6  | -4 | -12 | 2.43675 | 2.79975 | 13 |
| -6 | -4 | 12  | 3.81007 | 2.93136 | 10 |
| -6 | 4  | 12  | -0.0332 | 2.39410 | 10 |
| 5  | -4 | -12 | 8.36660 | 3.07171 | 13 |
| 5  | 4  | -12 | 0.68988 | 2.19006 | 10 |
| -5 | 4  | 12  | 5.22963 | 3.10307 | 10 |
| -4 | 4  | 12  | 31.9795 | 5.69562 | 10 |
| 4  | 4  | -12 | 42.4733 | 5.56844 | 10 |
| -3 | -4 | 12  | 40.1676 | 6.50444 | 13 |
| -3 | 4  | 12  | 29.9728 | 5.88540 | 10 |
| 3  | 4  | -12 | 40.4930 | 5.27618 | 10 |
| -2 | -4 | 12  | 215.804 | 14.7090 | 13 |
| 2  | -4 | -12 | 174.212 | 14.5245 | 10 |
| 2  | 4  | -12 | 222.945 | 14.6222 | 10 |
| 1  | -4 | -12 | 52.8595 | 6.45747 | 10 |
| -1 | -4 | 12  | 74.2500 | 7.85143 | 13 |
| -1 | 4  | 12  | 47.6565 | 7.10117 | 13 |
| 1  | 4  | -12 | 73.2131 | 6.24934 | 10 |
| 0  | -4 | 12  | 393.735 | 26.4521 | 13 |
| 0  | -4 | -12 | 416.469 | 26.6179 | 10 |
| 0  | -4 | -12 | 409.693 | 28.7273 | 1  |
| 0  | 4  | 12  | 391.884 | 26.6766 | 13 |
| 0  | 4  | -12 | 405.135 | 26.0653 | 10 |
| 0  | 4  | -12 | 399.842 | 25.5586 | 8  |
| 1  | -4 | 12  | 19.9017 | 4.33384 | 13 |
| -1 | 4  | -12 | 16.1314 | 3.09579 | 12 |
| -1 | 4  | -12 | 15.6188 | 2.98811 | 10 |
| -1 | 4  | -12 | 18.5458 | 2.68333 | 8  |
| -1 | 4  | -12 | 21.0184 | 3.37576 | 14 |
| 2  | -4 | 12  | 12.8522 | 4.00994 | 13 |
| -2 | -4 | -12 | 8.61227 | 2.44341 | 8  |
| -2 | -4 | -12 | 8.71801 | 2.99893 | 10 |
| -2 | 4  | -12 | 13.7838 | 2.96286 | 12 |
| 2  | 4  | 12  | 14.2665 | 3.96920 | 13 |
| -2 | 4  | -12 | 16.0786 | 2.22531 | 11 |
| -2 | 4  | -12 | 15.8218 | 2.62663 | 8  |
| -2 | 4  | -12 | 15.0251 | 3.20058 | 14 |
| -3 | -4 | -12 | 14.6053 | 2.65066 | 10 |
| -3 | -4 | -12 | 16.5050 | 2.51521 | 8  |
| 3  | -4 | 12  | 11.7289 | 3.09373 | 13 |
| -3 | 4  | -12 | 13.8816 | 2.97534 | 14 |
| 3  | 4  | 12  | 18.9762 | 3.88716 | 13 |
| -3 | 4  | -12 | 13.8145 | 2.15183 | 8  |
| -3 | 4  | -12 | 9.71309 | 2.80596 | 12 |
| -4 | -4 | -12 | 8.43816 | 2.14100 | 12 |
| -4 | -4 | -12 | 9.31804 | 1.98767 | 8  |
| -4 | 4  | -12 | 13.4897 | 2.57289 | 12 |
| 4  | 4  | 12  | 6.04031 | 3.06430 | 13 |
| 5  | -4 | 12  | 1.83234 | 1.73525 | 13 |



|    |    |     |         |         |    |
|----|----|-----|---------|---------|----|
| 5  | 4  | 12  | 2.51602 | 2.02110 | 13 |
| -5 | 4  | -12 | 2.94951 | 1.61697 | 12 |
| -8 | -5 | 12  | 13.7792 | 3.07983 | 10 |
| 8  | -5 | -12 | 19.5421 | 3.17105 | 13 |
| -8 | 5  | 12  | 18.7598 | 2.60044 | 10 |
| -7 | -5 | 12  | 17.1982 | 3.63837 | 10 |
| 7  | -5 | -12 | 12.4099 | 3.52742 | 13 |
| -7 | 5  | 12  | 19.7368 | 3.75969 | 10 |
| 6  | -5 | -12 | 0.95617 | 2.79218 | 13 |
| -6 | -5 | 12  | 0.95923 | 2.69051 | 10 |
| -6 | 5  | 12  | 1.65885 | 2.51026 | 10 |
| 5  | -5 | -12 | 28.2722 | 5.15597 | 13 |
| -5 | 5  | 12  | 23.6339 | 4.37514 | 10 |
| 5  | 5  | -12 | 26.2633 | 5.17369 | 10 |
| 4  | -5 | -12 | 60.3303 | 7.26692 | 13 |
| -4 | -5 | 12  | 74.5347 | 7.43608 | 13 |
| -4 | 5  | 12  | 73.5138 | 7.85190 | 10 |
| 4  | 5  | -12 | 90.9735 | 7.63515 | 10 |
| -3 | -5 | 12  | 30.3958 | 5.30988 | 13 |
| 3  | 5  | -12 | 28.7470 | 4.84289 | 10 |
| -3 | 5  | 12  | 33.7364 | 5.91044 | 10 |
| -2 | -5 | 12  | 115.356 | 10.4132 | 13 |
| 2  | -5 | -12 | 130.321 | 10.0997 | 10 |
| 2  | 5  | -12 | 120.679 | 9.54875 | 10 |
| 2  | 5  | -12 | 117.619 | 9.01606 | 14 |
| 1  | -5 | -12 | 188.562 | 12.6810 | 10 |
| -1 | -5 | 12  | 158.344 | 12.8526 | 13 |
| 1  | 5  | -12 | 159.606 | 11.8496 | 10 |
| 1  | 5  | -12 | 149.883 | 11.8269 | 14 |
| 0  | -5 | 12  | 20.7031 | 3.99174 | 13 |
| 0  | 5  | -12 | 21.4381 | 3.39358 | 14 |
| 0  | 5  | -12 | 21.5237 | 3.45028 | 12 |
| 0  | 5  | -12 | 19.4324 | 3.46936 | 10 |
| -1 | -5 | -12 | 22.6241 | 4.30858 | 10 |
| 1  | -5 | 12  | 10.5574 | 3.88225 | 13 |
| -1 | 5  | -12 | 11.2460 | 2.25982 | 10 |
| -1 | 5  | -12 | 12.7041 | 2.99134 | 14 |
| -1 | 5  | -12 | 12.3770 | 2.69782 | 12 |
| -1 | 5  | -12 | 11.0319 | 2.59822 | 8  |
| -2 | -5 | -12 | 18.7044 | 3.71925 | 10 |
| -2 | -5 | -12 | 16.8255 | 2.96616 | 8  |
| 2  | -5 | 12  | 21.9324 | 3.90351 | 13 |
| -2 | 5  | -12 | 25.8297 | 3.46803 | 8  |
| -2 | 5  | -12 | 25.1715 | 4.16115 | 12 |
| -2 | 5  | -12 | 24.2169 | 2.89232 | 11 |
| -2 | 5  | -12 | 25.9982 | 3.65957 | 14 |
| 2  | 5  | 12  | 23.8570 | 4.44122 | 13 |
| -3 | -5 | -12 | 25.1923 | 3.72306 | 10 |
| -3 | -5 | -12 | 26.1296 | 3.58141 | 8  |
| 3  | -5 | 12  | 26.5250 | 4.21694 | 13 |

|    |    |     |         |         |    |
|----|----|-----|---------|---------|----|
| -3 | 5  | -12 | 26.2633 | 4.08408 | 12 |
| 3  | 5  | 12  | 26.3654 | 4.27941 | 13 |
| -3 | 5  | -12 | 27.2662 | 4.57144 | 14 |
| -4 | -5 | -12 | 10.6007 | 2.16868 | 12 |
| 4  | -5 | 12  | 10.4722 | 2.63749 | 13 |
| -4 | -5 | -12 | 10.0337 | 3.10412 | 10 |
| -4 | -5 | -12 | 12.1248 | 1.77180 | 8  |
| -4 | 5  | -12 | 11.4922 | 2.51699 | 12 |
| 4  | 5  | 12  | 8.93773 | 3.02215 | 13 |
| -5 | 5  | -12 | 4.31887 | 1.62405 | 12 |
| 5  | 5  | 12  | 2.36164 | 2.42580 | 13 |
| -8 | -6 | 12  | 14.0443 | 2.70788 | 10 |
| 8  | -6 | -12 | 13.5860 | 2.90937 | 13 |
| -8 | 6  | 12  | 13.1311 | 1.89636 | 11 |
| 7  | -6 | -12 | 17.2107 | 3.53403 | 13 |
| -7 | -6 | 12  | 15.2562 | 3.49191 | 10 |
| -7 | 6  | 12  | 18.2794 | 3.49512 | 10 |
| -6 | -6 | 12  | 8.86051 | 2.87817 | 10 |
| 6  | 6  | -12 | 6.95572 | 2.95479 | 10 |
| 5  | -6 | -12 | 37.8212 | 6.65403 | 13 |
| 5  | 6  | -12 | 27.8750 | 4.53318 | 10 |
| -5 | 6  | 12  | 40.5031 | 5.71693 | 10 |
| -4 | -6 | 12  | 77.2341 | 7.97383 | 13 |
| 4  | -6 | -12 | 82.9309 | 7.71506 | 13 |
| 4  | 6  | -12 | 75.6529 | 7.06079 | 10 |
| -4 | 6  | 12  | 84.1621 | 8.20331 | 10 |
| -3 | -6 | 12  | 20.5670 | 4.40884 | 13 |
| 3  | 6  | -12 | 21.5403 | 3.87752 | 10 |
| -3 | 6  | 12  | 21.6797 | 4.46222 | 10 |
| -2 | -6 | 12  | 33.2293 | 6.31934 | 13 |
| 2  | 6  | -12 | 29.8225 | 4.55481 | 10 |
| 2  | 6  | -12 | 28.0146 | 4.88805 | 14 |
| -1 | -6 | 12  | 42.1368 | 5.82938 | 13 |
| 1  | 6  | -12 | 51.8229 | 5.02068 | 14 |
| 1  | 6  | -12 | 35.9959 | 4.71783 | 10 |
| 0  | -6 | -12 | 13.9260 | 4.66596 | 1  |
| 0  | -6 | -12 | 11.2578 | 3.40233 | 10 |
| 0  | 6  | 12  | 12.1539 | 3.42919 | 13 |
| 1  | -6 | 12  | 14.6851 | 3.51459 | 13 |
| -1 | -6 | -12 | 26.6821 | 5.29147 | 1  |
| -1 | -6 | -12 | 24.4763 | 4.51323 | 10 |
| 1  | 6  | 12  | 21.6494 | 4.75218 | 13 |
| -1 | 6  | -12 | 16.4409 | 2.88386 | 12 |
| -1 | 6  | -12 | 14.0616 | 3.00523 | 14 |
| -1 | 6  | -12 | 17.0138 | 2.28575 | 11 |
| -2 | -6 | -12 | 4.01197 | 2.06347 | 8  |
| -2 | -6 | -12 | 2.78546 | 2.58362 | 10 |
| 2  | -6 | 12  | 5.30738 | 2.79846 | 13 |
| -2 | 6  | -12 | 3.96115 | 1.15572 | 11 |
| -2 | 6  | -12 | 3.37378 | 2.37598 | 12 |

|    |    |     |         |         |    |
|----|----|-----|---------|---------|----|
| 2  | 6  | 12  | 2.80802 | 3.28391 | 13 |
| -2 | 6  | -12 | 1.98948 | 2.47885 | 14 |
| 3  | -6 | 12  | -2.3753 | 2.85669 | 13 |
| -3 | -6 | -12 | 3.62937 | 2.23056 | 10 |
| -3 | -6 | -12 | 1.31096 | 1.43700 | 8  |
| 3  | 6  | 12  | 0.27667 | 3.06841 | 13 |
| -3 | 6  | -12 | 3.52220 | 2.55595 | 14 |
| -3 | 6  | -12 | 0.10081 | 2.22850 | 12 |
| -4 | -6 | -12 | 5.05845 | 1.69895 | 12 |
| -4 | -6 | -12 | 5.87665 | 1.75239 | 10 |
| -4 | -6 | -12 | 6.15967 | 1.78468 | 8  |
| 4  | 6  | 12  | 5.69811 | 2.73811 | 13 |
| -4 | 6  | -12 | 2.46896 | 2.00014 | 12 |
| 8  | -7 | -12 | 8.57594 | 2.99148 | 13 |
| -8 | -7 | 12  | 11.5448 | 2.73663 | 10 |
| -8 | 7  | 12  | 9.38566 | 1.37105 | 11 |
| 7  | -7 | -12 | 11.0492 | 3.25611 | 13 |
| -7 | 7  | 12  | 11.7393 | 2.63206 | 10 |
| 6  | -7 | -12 | 15.6091 | 4.15738 | 13 |
| -6 | 7  | 12  | 10.3680 | 2.95051 | 10 |
| 6  | 7  | -12 | 11.4134 | 3.54617 | 10 |
| 5  | -7 | -12 | 37.9676 | 6.49383 | 13 |
| -5 | 7  | 12  | 24.6338 | 4.46353 | 10 |
| 5  | 7  | -12 | 23.2007 | 4.36470 | 10 |
| -4 | -7 | 12  | 23.8822 | 4.22975 | 13 |
| 4  | 7  | -12 | 21.2022 | 3.85681 | 10 |
| -3 | -7 | 12  | 76.1343 | 8.03972 | 13 |
| 3  | 7  | -12 | 73.2842 | 7.00480 | 10 |
| -3 | 7  | 12  | 68.4137 | 7.86686 | 10 |
| -2 | -7 | 12  | 17.4687 | 4.39864 | 13 |
| 2  | 7  | -12 | 17.6159 | 3.37985 | 10 |
| 1  | -7 | -12 | 15.6914 | 5.77897 | 1  |
| -1 | -7 | 12  | 5.65643 | 3.12813 | 13 |
| 1  | -7 | -12 | 11.8004 | 3.53480 | 10 |
| 1  | 7  | -12 | 8.27691 | 2.51113 | 10 |
| 1  | 7  | -12 | 10.1788 | 3.08631 | 14 |
| 0  | -7 | -12 | 36.5955 | 5.54307 | 10 |
| 0  | -7 | 12  | 43.9624 | 5.99811 | 13 |
| 0  | -7 | -12 | 47.4058 | 7.55821 | 1  |
| 0  | 7  | -12 | 44.1202 | 4.32025 | 10 |
| 0  | 7  | -12 | 37.0720 | 4.84228 | 14 |
| -1 | -7 | -12 | 81.4591 | 9.20866 | 1  |
| 1  | -7 | 12  | 66.9025 | 7.39501 | 13 |
| -1 | 7  | -12 | 81.0035 | 7.08267 | 12 |
| -1 | 7  | -12 | 73.4404 | 6.91623 | 14 |
| -1 | 7  | -12 | 77.2441 | 5.73031 | 11 |
| 2  | -7 | 12  | -1.1612 | 2.45637 | 13 |
| -2 | -7 | -12 | 5.13946 | 2.89307 | 10 |
| -2 | 7  | -12 | 0.20843 | 0.82246 | 11 |
| -2 | 7  | -12 | 0.26953 | 0.78564 | 11 |

|    |    |     |         |         |    |
|----|----|-----|---------|---------|----|
| -2 | 7  | -12 | -0.2891 | 2.35503 | 14 |
| -2 | 7  | -12 | -2.2069 | 2.17013 | 12 |
| -3 | -7 | -12 | 8.13871 | 2.69890 | 10 |
| -3 | -7 | -12 | 10.5349 | 2.46139 | 8  |
| 3  | 7  | 12  | 8.21499 | 4.11585 | 13 |
| -3 | 7  | -12 | 14.7294 | 2.91936 | 12 |
| -3 | 7  | -12 | 15.9920 | 3.14190 | 14 |
| -4 | -7 | -12 | 0.81751 | 1.60187 | 8  |
| -4 | -7 | -12 | 0.44896 | 1.69757 | 10 |
| -4 | -7 | -12 | -0.6901 | 1.60504 | 12 |
| 4  | 7  | 12  | 2.23253 | 2.51975 | 13 |
| -4 | 7  | -12 | 0.27061 | 1.95600 | 12 |
| 8  | -8 | -12 | 14.2577 | 3.04268 | 13 |
| -8 | -8 | 12  | 8.37269 | 2.55273 | 10 |
| -8 | 8  | 12  | 13.2852 | 1.41266 | 11 |
| -7 | -8 | 12  | 9.02384 | 3.02509 | 10 |
| -7 | 8  | 12  | 8.63375 | 2.19566 | 10 |
| 6  | -8 | -12 | 15.1273 | 3.42595 | 13 |
| -6 | 8  | 12  | 13.0460 | 3.02489 | 10 |
| 6  | 8  | -12 | 14.3333 | 3.07151 | 10 |
| 5  | -8 | -12 | 8.82026 | 3.74751 | 13 |
| -5 | 8  | 12  | 2.83188 | 2.98227 | 10 |
| 5  | 8  | -12 | 0.26280 | 2.84205 | 10 |
| -4 | -8 | 12  | 39.5803 | 5.96200 | 13 |
| 4  | -8 | -12 | 25.5477 | 4.80306 | 13 |
| 4  | 8  | -12 | 33.3354 | 5.21574 | 10 |
| -4 | 8  | 12  | 29.5260 | 5.54314 | 10 |
| -3 | -8 | 12  | 4.67516 | 3.53495 | 13 |
| -3 | 8  | 12  | 8.19423 | 3.64133 | 10 |
| 3  | 8  | -12 | 5.27104 | 2.79260 | 10 |
| -2 | -8 | 12  | 18.4503 | 3.86493 | 13 |
| -2 | 8  | 12  | 16.7914 | 4.33515 | 10 |
| 2  | 8  | -12 | 20.2110 | 3.92007 | 10 |
| -1 | -8 | 12  | 7.43758 | 3.10379 | 13 |
| 1  | -8 | -12 | 6.54424 | 3.33796 | 10 |
| 1  | -8 | -12 | 6.34777 | 4.87205 | 1  |
| 1  | 8  | -12 | 7.52828 | 2.35314 | 10 |
| 1  | 8  | -12 | 9.31919 | 2.55559 | 14 |
| 0  | -8 | -12 | 0.79956 | 3.63443 | 1  |
| 0  | -8 | 12  | 3.24792 | 2.84181 | 13 |
| 0  | -8 | -12 | 2.51736 | 2.86887 | 10 |
| 0  | 8  | -12 | 1.99904 | 2.30849 | 14 |
| 0  | 8  | -12 | 3.20180 | 2.16442 | 10 |
| 1  | -8 | 12  | 11.9593 | 3.29373 | 13 |
| -1 | -8 | -12 | 8.75318 | 4.15237 | 1  |
| -1 | -8 | -12 | 12.0569 | 3.44923 | 10 |
| 1  | 8  | 12  | 12.2181 | 4.07610 | 13 |
| -1 | 8  | -12 | 16.3100 | 2.90778 | 12 |
| -1 | 8  | -12 | 10.3363 | 2.87990 | 14 |
| -1 | 8  | -12 | 12.3282 | 1.92726 | 11 |

|    |    |     |         |         |    |
|----|----|-----|---------|---------|----|
| -2 | -8 | -12 | 4.07810 | 2.87495 | 10 |
| 2  | -8 | 12  | 8.76094 | 2.96314 | 13 |
| 2  | 8  | 12  | 5.18299 | 3.29878 | 13 |
| -3 | -8 | -12 | 10.9755 | 2.77569 | 10 |
| -3 | -8 | -12 | 12.1638 | 2.44986 | 8  |
| -3 | 8  | -12 | 10.6355 | 2.87121 | 14 |
| 3  | 8  | 12  | 10.8384 | 3.28210 | 13 |
| -3 | 8  | -12 | 8.27894 | 2.50022 | 12 |
| -4 | -8 | -12 | 8.53394 | 1.81385 | 10 |
| -4 | 8  | -12 | 9.36952 | 2.23235 | 12 |
| 4  | 8  | 12  | 8.96148 | 2.61328 | 13 |
| 8  | -9 | -12 | 3.97599 | 2.15076 | 13 |
| -7 | -9 | 12  | 49.6804 | 4.77113 | 10 |
| 7  | -9 | -12 | 40.3739 | 5.31788 | 13 |
| -7 | 9  | 12  | 37.2803 | 3.90624 | 10 |
| 7  | 9  | -12 | 46.1970 | 4.76369 | 10 |
| 6  | -9 | -12 | 19.6659 | 3.55998 | 13 |
| 6  | 9  | -12 | 16.8096 | 3.69572 | 10 |
| -6 | 9  | 12  | 14.6349 | 2.96487 | 10 |
| 5  | -9 | -12 | 22.9158 | 3.86358 | 13 |
| -5 | 9  | 12  | 24.0126 | 4.27437 | 10 |
| 5  | 9  | -12 | 26.3175 | 5.03031 | 10 |
| 4  | -9 | -12 | 17.1638 | 3.94180 | 13 |
| -4 | 9  | 12  | 19.2927 | 4.44070 | 10 |
| 3  | -9 | -12 | 18.7593 | 3.29618 | 13 |
| -3 | -9 | 12  | 9.87249 | 3.34931 | 13 |
| 3  | 9  | -12 | 10.4656 | 3.26081 | 10 |
| -2 | -9 | 12  | 87.9172 | 8.21975 | 13 |
| -2 | 9  | 12  | 68.9610 | 7.95332 | 10 |
| 2  | 9  | -12 | 68.9904 | 6.63674 | 10 |
| -1 | -9 | 12  | 11.9175 | 3.41639 | 13 |
| 1  | -9 | -12 | 10.4519 | 4.78424 | 1  |
| 1  | 9  | -12 | 15.9698 | 2.99088 | 14 |
| 1  | 9  | -12 | 12.6254 | 3.07740 | 10 |
| 0  | -9 | -12 | 36.4328 | 5.36954 | 10 |
| 0  | -9 | -12 | 35.5024 | 7.20989 | 1  |
| 0  | 9  | -12 | 24.3040 | 3.66291 | 14 |
| 0  | 9  | -12 | 22.7647 | 3.25031 | 11 |
| -1 | -9 | -12 | 28.0207 | 4.73365 | 10 |
| 1  | -9 | 12  | 17.8018 | 3.49076 | 13 |
| -1 | 9  | -12 | 11.6568 | 2.76789 | 12 |
| -1 | 9  | -12 | 17.6514 | 2.30995 | 11 |
| -1 | 9  | -12 | 18.8548 | 3.37095 | 14 |
| -1 | 9  | -12 | 22.0209 | 2.86126 | 11 |
| -2 | -9 | -12 | 29.5655 | 4.62976 | 10 |
| 2  | 9  | 12  | 34.1717 | 5.13347 | 13 |
| -2 | 9  | -12 | 31.5703 | 4.01381 | 14 |
| -2 | 9  | -12 | 27.5177 | 4.12528 | 12 |
| -3 | -9 | -12 | 11.0898 | 2.78203 | 10 |
| -3 | -9 | -12 | 9.30189 | 2.70456 | 8  |

|    |     |     |         |         |    |
|----|-----|-----|---------|---------|----|
| -3 | 9   | -12 | 16.9557 | 2.97051 | 14 |
| 3  | 9   | 12  | 9.72402 | 3.40731 | 13 |
| -3 | 9   | -12 | 14.4984 | 2.68269 | 12 |
| -4 | -9  | -12 | 1.79208 | 1.52107 | 10 |
| 4  | 9   | 12  | 2.29055 | 2.50708 | 13 |
| -4 | 9   | -12 | 1.17495 | 1.80705 | 12 |
| 7  | -10 | -12 | 2.13794 | 2.46655 | 13 |
| -7 | 10  | 12  | 1.63796 | 1.04418 | 11 |
| 6  | -10 | -12 | 35.2786 | 5.11368 | 13 |
| 6  | 10  | -12 | 17.0230 | 3.88794 | 10 |
| -6 | 10  | 12  | 26.6171 | 3.69642 | 10 |
| 5  | -10 | -12 | 66.6645 | 7.41785 | 13 |
| 5  | 10  | -12 | 68.3415 | 6.81573 | 10 |
| -5 | 10  | 12  | 54.8878 | 6.32243 | 10 |
| 4  | -10 | -12 | 4.11947 | 2.93560 | 13 |
| -4 | -10 | 12  | -1.8702 | 3.21053 | 13 |
| 4  | 10  | -12 | 0.03024 | 2.06223 | 10 |
| -4 | 10  | 12  | 6.78705 | 3.53519 | 10 |
| 3  | -10 | -12 | 7.73071 | 2.91445 | 13 |
| -3 | -10 | 12  | 9.69343 | 3.37815 | 13 |
| -3 | 10  | 12  | 8.92567 | 3.66823 | 10 |
| -2 | -10 | 12  | 97.2392 | 9.28025 | 13 |
| -2 | 10  | 12  | 111.424 | 9.59871 | 10 |
| 2  | 10  | -12 | 92.6529 | 8.31972 | 10 |
| -1 | -10 | 12  | 102.052 | 8.89641 | 13 |
| 1  | -10 | -12 | 94.4310 | 11.3965 | 1  |
| -1 | 10  | 12  | 93.9662 | 9.63492 | 10 |
| 1  | 10  | -12 | 106.285 | 7.93169 | 10 |
| 1  | 10  | -12 | 115.567 | 8.55792 | 14 |
| 0  | -10 | -12 | 32.0762 | 5.21444 | 10 |
| 0  | -10 | 12  | 23.3278 | 3.99085 | 13 |
| 0  | -10 | -12 | 28.0578 | 6.11776 | 1  |
| 0  | 10  | -12 | 27.5970 | 3.91891 | 14 |
| 0  | 10  | -12 | 24.9503 | 3.05096 | 11 |
| 1  | -10 | 12  | -0.9601 | 2.95753 | 13 |
| -1 | -10 | -12 | 2.64779 | 3.03347 | 10 |
| -1 | 10  | -12 | -2.2350 | 2.32800 | 14 |
| -1 | 10  | -12 | -0.4897 | 0.73412 | 11 |
| -2 | -10 | -12 | 9.03894 | 2.39092 | 10 |
| -2 | 10  | -12 | 3.67017 | 2.21508 | 12 |
| -2 | 10  | -12 | -1.3655 | 2.58254 | 14 |
| -3 | -10 | -12 | 5.64535 | 2.00821 | 10 |
| -3 | 10  | -12 | 4.42758 | 2.30512 | 12 |
| -3 | 10  | -12 | 6.81684 | 2.55078 | 14 |
| -4 | -10 | -12 | 0.22777 | 1.48401 | 10 |
| -4 | 10  | -12 | 2.33987 | 1.75151 | 12 |
| 7  | -11 | -12 | 27.4027 | 4.16975 | 13 |
| -7 | 11  | 12  | 21.8757 | 2.04913 | 11 |
| 6  | -11 | -12 | 3.44775 | 2.73022 | 13 |
| -6 | 11  | 12  | 4.05963 | 1.99786 | 10 |

|    |     |     |         |         |    |
|----|-----|-----|---------|---------|----|
| 6  | 11  | -12 | 10.2428 | 3.19108 | 10 |
| 5  | -11 | -12 | 58.0579 | 6.92721 | 13 |
| -5 | 11  | 12  | 54.9613 | 5.86582 | 10 |
| -4 | -11 | 12  | 5.66588 | 2.80804 | 13 |
| 4  | -11 | -12 | 6.20110 | 3.36302 | 13 |
| -4 | 11  | 12  | 6.18594 | 3.32831 | 10 |
| 4  | 11  | -12 | 6.28416 | 2.94759 | 10 |
| -3 | -11 | 12  | 16.0584 | 3.85870 | 13 |
| 3  | -11 | -12 | 28.0580 | 4.88515 | 13 |
| -3 | 11  | 12  | 26.1289 | 4.67367 | 10 |
| 3  | 11  | -12 | 18.0708 | 3.62634 | 10 |
| -2 | -11 | 12  | 2.50925 | 3.69984 | 13 |
| -2 | 11  | 12  | 19.7055 | 4.47744 | 10 |
| -1 | -11 | 12  | 164.200 | 12.4243 | 13 |
| 1  | 11  | -12 | 166.158 | 12.1531 | 14 |
| -1 | 11  | 12  | 183.743 | 13.6191 | 10 |
| 1  | 11  | -12 | 157.766 | 11.3598 | 10 |
| 0  | -11 | 12  | 7.04183 | 3.51769 | 13 |
| 0  | -11 | -12 | 11.3291 | 2.79189 | 10 |
| 0  | 11  | -12 | 6.10019 | 2.86412 | 14 |
| 0  | 11  | -12 | 9.87117 | 1.58970 | 11 |
| 1  | -11 | 12  | 13.5610 | 3.12789 | 13 |
| -1 | -11 | -12 | 18.3148 | 3.44212 | 10 |
| -1 | 11  | -12 | 11.3294 | 3.06602 | 14 |
| -2 | -11 | -12 | 11.1352 | 2.61801 | 10 |
| -2 | 11  | -12 | 11.7808 | 2.90138 | 14 |
| -2 | 11  | -12 | 12.6323 | 2.63784 | 12 |
| -3 | -11 | -12 | 4.03284 | 1.77844 | 10 |
| -3 | 11  | -12 | 1.94664 | 2.22709 | 14 |
| -3 | 11  | -12 | 1.60125 | 1.10605 | 9  |
| -3 | 11  | -12 | 0.08797 | 1.88667 | 12 |
| -4 | -11 | -12 | 1.50895 | 1.92793 | 10 |
| -4 | 11  | -12 | 4.92506 | 1.70948 | 12 |
| 7  | -12 | -12 | 17.5290 | 2.82128 | 13 |
| -7 | 12  | 12  | 15.3896 | 1.59439 | 11 |
| 7  | 12  | -12 | 12.2149 | 2.53809 | 10 |
| -7 | 12  | 12  | 18.4298 | 1.60234 | 11 |
| 6  | -12 | -12 | 26.4370 | 4.59379 | 13 |
| -6 | 12  | 12  | 22.9705 | 3.07454 | 10 |
| -5 | 12  | 12  | 23.2469 | 4.14671 | 10 |
| -4 | -12 | 12  | 6.59880 | 3.35270 | 13 |
| 4  | -12 | -12 | 6.17216 | 2.99404 | 13 |
| -4 | 12  | 12  | 6.21265 | 3.26233 | 10 |
| 4  | 12  | -12 | 5.28709 | 2.75746 | 10 |
| -3 | -12 | 12  | 50.4149 | 6.13759 | 13 |
| 3  | -12 | -12 | 50.3893 | 5.68833 | 13 |
| -3 | 12  | 12  | 43.4109 | 6.13277 | 10 |
| 3  | 12  | -12 | 39.6442 | 5.03072 | 10 |
| -2 | -12 | 12  | 52.7449 | 5.98834 | 13 |
| -2 | 12  | 12  | 33.9000 | 6.39115 | 10 |

|    |     |     |         |         |    |
|----|-----|-----|---------|---------|----|
| 2  | 12  | -12 | 51.3469 | 4.90028 | 10 |
| -1 | -12 | 12  | 2.64735 | 2.75417 | 13 |
| 1  | 12  | -12 | 4.32074 | 2.21728 | 11 |
| 1  | 12  | -12 | 4.00801 | 2.71320 | 14 |
| 0  | -12 | -12 | 41.4684 | 5.63800 | 10 |
| 0  | -12 | 12  | 38.9423 | 6.25261 | 13 |
| 0  | 12  | -12 | 38.1467 | 3.13978 | 11 |
| 0  | 12  | -12 | 36.9666 | 3.21218 | 11 |
| 0  | 12  | 12  | 27.8467 | 5.50468 | 10 |
| 1  | -12 | 12  | 40.9529 | 5.02479 | 13 |
| -1 | -12 | -12 | 31.1207 | 5.04418 | 10 |
| -2 | -12 | -12 | 27.8210 | 3.72470 | 10 |
| -2 | 12  | -12 | 29.9651 | 4.61647 | 14 |
| -2 | 12  | -12 | 31.0470 | 3.82609 | 12 |
| -3 | -12 | -12 | 0.04961 | 1.48596 | 10 |
| -3 | 12  | -12 | 0.78181 | 0.82529 | 9  |
| -3 | 12  | -12 | -0.3409 | 1.63920 | 12 |
| -3 | 12  | -12 | 1.44678 | 2.11141 | 14 |
| 7  | -13 | -12 | 5.17265 | 2.10849 | 13 |
| 6  | -13 | -12 | 30.4683 | 4.82826 | 13 |
| 6  | 13  | -12 | 19.1877 | 3.59085 | 10 |
| -6 | 13  | 12  | 20.4617 | 2.30110 | 11 |
| 5  | -13 | -12 | 11.6091 | 3.11863 | 13 |
| 5  | 13  | -12 | 14.4164 | 3.29012 | 10 |
| -5 | 13  | 12  | 12.1413 | 3.13469 | 10 |
| 4  | -13 | -12 | 11.7273 | 3.13036 | 13 |
| -4 | -13 | 12  | 15.4494 | 3.21607 | 13 |
| 4  | 13  | -12 | 13.4511 | 3.13217 | 10 |
| -4 | 13  | 12  | 10.5342 | 2.75298 | 10 |
| -3 | -13 | 12  | 24.3517 | 3.82396 | 13 |
| 3  | -13 | -12 | 18.8635 | 3.62459 | 13 |
| 3  | 13  | -12 | 27.9448 | 4.09478 | 10 |
| -3 | 13  | 12  | 17.7165 | 4.13964 | 10 |
| -2 | -13 | 12  | 95.1281 | 8.59518 | 13 |
| 2  | 13  | -12 | 92.1294 | 7.26526 | 10 |
| 1  | 13  | -12 | 36.9797 | 5.08349 | 14 |
| 1  | 13  | -12 | 25.6560 | 3.33791 | 11 |
| 0  | -13 | 12  | 51.1464 | 5.72020 | 13 |
| 0  | 13  | -12 | 50.8463 | 5.76486 | 14 |
| 0  | 13  | 12  | 53.1724 | 6.85302 | 10 |
| -1 | -13 | -12 | 64.2437 | 6.69331 | 10 |
| 1  | -13 | 12  | 68.3636 | 7.25164 | 13 |
| -1 | 13  | -12 | 69.7408 | 6.58479 | 14 |
| -2 | -13 | -12 | 1.64280 | 2.65517 | 10 |
| -2 | 13  | -12 | 4.36684 | 2.50720 | 14 |
| -3 | -13 | -12 | 2.78487 | 2.07834 | 10 |
| -3 | 13  | -12 | 4.20494 | 2.01125 | 14 |
| -3 | 13  | -12 | 1.65845 | 1.62054 | 12 |
| 6  | -14 | -12 | 4.97574 | 2.27506 | 13 |
| 6  | 14  | -12 | 5.77563 | 2.09309 | 10 |



|    |     |     |         |         |    |
|----|-----|-----|---------|---------|----|
| -6 | 14  | 12  | 4.42270 | 1.07703 | 11 |
| 5  | -14 | -12 | 29.8776 | 4.70631 | 13 |
| -5 | 14  | 12  | 29.3107 | 4.04891 | 10 |
| 5  | 14  | -12 | 38.8733 | 4.77789 | 10 |
| 4  | -14 | -12 | 23.0062 | 3.68224 | 13 |
| -4 | -14 | 12  | 23.1769 | 3.89989 | 13 |
| -4 | 14  | 12  | 20.8432 | 3.50945 | 10 |
| 4  | 14  | -12 | 22.8661 | 3.93054 | 10 |
| 3  | -14 | -12 | 26.8620 | 4.83725 | 13 |
| -3 | -14 | 12  | 35.1515 | 5.16652 | 13 |
| -3 | 14  | 12  | 32.1321 | 5.07865 | 10 |
| 3  | 14  | -12 | 37.8062 | 4.70481 | 10 |
| -2 | -14 | 12  | 50.9294 | 6.24622 | 13 |
| 2  | 14  | -12 | 47.0741 | 4.65020 | 10 |
| 2  | 14  | -12 | 49.3538 | 4.56011 | 11 |
| -1 | -14 | 12  | 6.66555 | 2.75851 | 13 |
| 1  | 14  | -12 | 5.22737 | 2.65371 | 14 |
| 1  | 14  | -12 | 7.83947 | 1.63040 | 11 |
| -1 | 14  | 12  | 3.94961 | 3.33970 | 10 |
| 0  | -14 | 12  | 3.89155 | 2.96450 | 13 |
| 0  | 14  | -12 | 6.53675 | 2.93989 | 14 |
| -1 | -14 | -12 | 55.0658 | 5.29727 | 10 |
| -1 | 14  | -12 | 50.1126 | 5.62690 | 14 |
| -2 | 14  | -12 | 18.5337 | 2.59975 | 14 |
| -2 | 14  | -12 | 21.9319 | 2.65216 | 9  |
| -3 | -14 | -12 | 24.4700 | 3.34736 | 10 |
| -3 | 14  | -12 | 20.0785 | 3.39994 | 14 |
| 6  | -15 | -12 | 7.79098 | 2.20215 | 13 |
| -6 | 15  | 12  | 7.91653 | 1.19253 | 11 |
| 6  | 15  | -12 | 12.5564 | 2.72155 | 10 |
| -6 | 15  | 12  | 7.61924 | 1.07433 | 11 |
| 5  | -15 | -12 | 15.1579 | 2.79418 | 13 |
| -5 | 15  | 12  | 15.2079 | 2.69777 | 10 |
| 5  | 15  | -12 | 9.46979 | 2.81589 | 10 |
| -4 | -15 | 12  | 10.4642 | 2.69209 | 13 |
| 4  | -15 | -12 | 17.5924 | 3.07919 | 13 |
| -4 | 15  | 12  | 18.5229 | 3.60122 | 10 |
| 4  | 15  | -12 | 11.8060 | 2.38924 | 10 |
| -3 | -15 | 12  | 34.5118 | 4.91723 | 13 |
| 3  | 15  | -12 | 22.5806 | 3.60578 | 10 |
| -3 | 15  | 12  | 25.3473 | 4.66168 | 10 |
| -2 | -15 | 12  | 8.93043 | 3.11372 | 13 |
| 2  | 15  | -12 | 16.9862 | 2.30196 | 11 |
| -2 | 15  | 12  | 12.8172 | 4.09618 | 10 |
| -1 | -15 | 12  | 9.58499 | 3.01245 | 13 |
| 1  | 15  | -12 | 9.77193 | 2.97325 | 14 |
| 1  | 15  | -12 | 6.62667 | 1.21038 | 11 |
| 1  | 15  | -12 | 4.41786 | 1.24637 | 11 |
| -1 | 15  | 12  | 0.81931 | 2.35541 | 10 |
| 0  | -15 | 12  | 5.12040 | 2.38666 | 13 |

|    |     |     |         |         |    |
|----|-----|-----|---------|---------|----|
| 0  | 15  | -12 | 4.69390 | 2.68144 | 14 |
| 0  | 15  | 12  | 4.29131 | 3.54657 | 10 |
| -1 | -15 | -12 | 19.8202 | 3.24732 | 10 |
| 1  | 15  | 12  | 19.3125 | 3.80368 | 10 |
| -1 | 15  | -12 | 19.6562 | 3.10432 | 14 |
| -2 | -15 | -12 | 43.7210 | 4.33153 | 10 |
| -2 | 15  | -12 | 47.1507 | 4.68564 | 14 |
| 6  | -16 | -12 | 8.20830 | 2.07520 | 13 |
| 5  | -16 | -12 | 3.90317 | 2.06390 | 13 |
| -5 | 16  | 12  | 3.34656 | 1.02974 | 11 |
| 5  | 16  | -12 | 3.65608 | 2.20465 | 10 |
| -4 | -16 | 12  | 8.10811 | 2.37793 | 13 |
| 4  | -16 | -12 | 3.98968 | 2.36419 | 13 |
| -4 | 16  | 12  | 5.11514 | 2.59138 | 10 |
| 4  | 16  | -12 | 8.41478 | 2.29355 | 10 |
| -3 | -16 | 12  | 18.1781 | 3.22076 | 13 |
| 3  | -16 | -12 | 26.7968 | 4.11582 | 13 |
| 3  | 16  | -12 | 14.4059 | 2.77764 | 11 |
| 3  | 16  | -12 | 19.2671 | 3.21097 | 10 |
| -2 | -16 | 12  | 2.94041 | 2.36725 | 13 |
| -2 | 16  | 12  | 1.24441 | 2.92128 | 10 |
| -1 | -16 | 12  | -1.0172 | 2.13613 | 13 |
| -1 | 16  | 12  | -0.4539 | 2.07056 | 10 |
| 1  | 16  | -12 | 0.14125 | 2.30441 | 14 |
| 0  | -16 | 12  | 6.64741 | 2.75494 | 13 |
| 0  | 16  | 12  | 6.54384 | 3.42223 | 10 |
| 0  | 16  | -12 | 9.49368 | 2.73771 | 14 |
| -1 | 16  | -12 | 14.0434 | 2.68461 | 14 |
| 1  | 16  | 12  | 8.97321 | 2.69413 | 10 |
| -2 | 16  | -12 | 21.9388 | 3.42054 | 14 |
| 5  | -17 | -12 | 2.47117 | 1.83558 | 13 |
| 5  | 17  | -12 | 3.33556 | 2.13112 | 10 |
| -5 | 17  | 12  | 3.77614 | 0.78318 | 11 |
| 4  | -17 | -12 | 23.9394 | 3.64560 | 13 |
| -4 | 17  | 12  | 26.0091 | 3.31852 | 10 |
| -3 | -17 | 12  | 16.8051 | 2.74662 | 13 |
| 3  | -17 | -12 | 8.05245 | 2.38225 | 13 |
| -3 | 17  | 12  | 12.9051 | 2.81085 | 10 |
| 3  | 17  | -12 | 14.7100 | 1.92394 | 11 |
| -2 | -17 | 12  | 15.8690 | 2.89326 | 13 |
| 2  | 17  | -12 | 15.6429 | 1.86667 | 11 |
| -2 | 17  | 12  | 11.3296 | 2.61735 | 10 |
| 2  | 17  | -12 | 16.2998 | 2.00488 | 11 |
| -1 | -17 | 12  | 7.62831 | 2.37108 | 13 |
| -1 | 17  | 12  | 6.48137 | 2.94751 | 10 |
| 1  | 17  | -12 | 8.96420 | 2.75846 | 14 |
| 0  | -17 | 12  | 12.5898 | 2.50931 | 13 |
| 0  | 17  | -12 | 13.0051 | 2.71476 | 14 |
| 0  | 17  | 12  | 17.4673 | 3.31405 | 10 |
| 1  | 17  | 12  | 35.3206 | 4.73151 | 10 |

|    |     |     |         |         |    |
|----|-----|-----|---------|---------|----|
| -1 | 17  | -12 | 35.2135 | 4.09437 | 14 |
| -4 | -18 | 12  | 54.8228 | 5.05757 | 13 |
| 4  | -18 | -12 | 57.4191 | 5.11536 | 13 |
| -4 | 18  | 12  | 55.8519 | 3.89876 | 11 |
| 4  | 18  | -12 | 49.3759 | 4.22060 | 11 |
| -3 | -18 | 12  | 44.8696 | 4.41115 | 13 |
| 3  | -18 | -12 | 31.4583 | 3.93235 | 13 |
| -3 | 18  | 12  | 33.7404 | 4.00209 | 10 |
| 3  | 18  | -12 | 43.7507 | 3.30417 | 11 |
| -2 | -18 | 12  | 15.7944 | 2.65349 | 13 |
| -2 | 18  | 12  | 13.1843 | 2.89673 | 10 |
| -1 | -18 | 12  | -0.0637 | 2.23787 | 13 |
| -1 | 18  | 12  | -0.2926 | 2.42438 | 10 |
| 0  | -18 | 12  | 9.29491 | 2.34406 | 13 |
| 0  | 18  | -12 | 9.04723 | 2.15879 | 14 |
| 0  | 18  | 12  | 11.0700 | 2.42082 | 10 |
| -1 | 18  | -12 | 20.3963 | 3.18274 | 14 |
| 3  | -19 | -12 | 76.8946 | 5.54462 | 13 |
| -3 | -19 | 12  | 67.6016 | 5.68508 | 13 |
| -2 | -19 | 12  | 33.9580 | 3.78479 | 13 |
| -2 | 19  | 12  | 30.2274 | 3.72565 | 10 |
| -1 | -19 | 12  | 6.71780 | 1.82439 | 13 |
| -1 | 19  | 12  | 3.85520 | 1.73302 | 10 |
| 0  | 19  | 12  | 4.54097 | 2.52731 | 10 |
| -8 | 0   | 13  | 0.42166 | 1.32475 | 10 |
| -7 | 0   | 13  | 34.4828 | 4.68541 | 10 |
| -6 | 0   | 13  | 24.4993 | 3.93323 | 10 |
| -5 | 0   | 13  | 3.20973 | 2.93708 | 10 |
| 4  | 0   | -13 | 8.12457 | 3.27590 | 10 |
| 3  | 0   | -13 | 2.55682 | 2.84019 | 10 |
| -2 | 0   | 13  | 12.3013 | 3.42147 | 13 |
| 2  | 0   | -13 | 14.4436 | 3.41156 | 10 |
| -1 | 0   | 13  | 43.5019 | 6.33691 | 13 |
| 1  | 0   | -13 | 48.3844 | 5.58360 | 10 |
| 1  | 0   | -13 | 46.9126 | 5.57311 | 8  |
| 0  | 0   | 13  | -2.1934 | 3.76188 | 13 |
| 0  | 0   | -13 | 0.56865 | 2.68919 | 1  |
| 0  | 0   | -13 | -0.5091 | 2.23788 | 10 |
| 0  | 0   | -13 | 1.04394 | 2.04433 | 8  |
| -1 | 0   | -13 | 3.51669 | 2.15827 | 8  |
| -1 | 0   | -13 | 3.74658 | 2.30161 | 10 |
| 1  | 0   | 13  | -1.0280 | 3.42348 | 13 |
| -2 | 0   | -13 | 9.35410 | 2.22498 | 8  |
| -2 | 0   | -13 | 8.62994 | 2.31535 | 10 |
| -2 | 0   | -13 | 10.6477 | 2.86474 | 14 |
| -2 | 0   | -13 | 11.5622 | 2.67132 | 12 |
| 2  | 0   | 13  | 7.18138 | 3.44548 | 13 |
| -3 | 0   | -13 | 0.32690 | 1.99854 | 12 |
| 3  | 0   | 13  | 0.49813 | 2.70315 | 13 |
| -3 | 0   | -13 | 0.27314 | 1.48614 | 8  |

|    |    |     |         |         |    |
|----|----|-----|---------|---------|----|
| -3 | 0  | -13 | -2.3430 | 1.98089 | 14 |
| 4  | 0  | 13  | 3.70503 | 2.24065 | 13 |
| -4 | 0  | -13 | 4.43492 | 1.80013 | 12 |
| -8 | -1 | 13  | 7.55618 | 2.31724 | 10 |
| -8 | 1  | 13  | 6.77797 | 2.12574 | 10 |
| -7 | -1 | 13  | 11.9392 | 3.20983 | 10 |
| -6 | -1 | 13  | 28.0846 | 4.76813 | 10 |
| -6 | 1  | 13  | 18.2502 | 3.83637 | 10 |
| -5 | -1 | 13  | 28.0058 | 4.90813 | 10 |
| -5 | 1  | 13  | 16.6543 | 3.86578 | 10 |
| -4 | 1  | 13  | 75.9982 | 9.01654 | 10 |
| 4  | 1  | -13 | 100.270 | 8.40642 | 10 |
| 3  | -1 | -13 | 12.7597 | 3.54190 | 10 |
| 3  | 1  | -13 | 17.2815 | 3.68427 | 10 |
| -2 | -1 | 13  | 29.7336 | 4.86980 | 13 |
| 2  | -1 | -13 | 29.0769 | 4.73815 | 10 |
| -2 | 1  | 13  | 25.4467 | 4.06685 | 13 |
| 2  | 1  | -13 | 28.1706 | 4.79161 | 10 |
| -1 | -1 | 13  | 54.1898 | 7.65758 | 13 |
| 1  | -1 | -13 | 69.8065 | 6.47708 | 10 |
| 1  | 1  | -13 | 59.7444 | 6.29884 | 10 |
| -1 | 1  | 13  | 78.4413 | 8.08455 | 13 |
| 1  | 1  | -13 | 54.0833 | 5.61956 | 8  |
| 0  | -1 | -13 | 101.622 | 8.34073 | 10 |
| 0  | -1 | -13 | 103.326 | 9.76780 | 1  |
| 0  | -1 | 13  | 99.1248 | 10.0345 | 13 |
| 0  | -1 | -13 | 103.006 | 7.88911 | 8  |
| 0  | 1  | 13  | 107.376 | 9.24698 | 13 |
| 0  | 1  | -13 | 102.094 | 7.79057 | 8  |
| 0  | 1  | -13 | 94.3517 | 8.11942 | 10 |
| -1 | -1 | -13 | 25.6011 | 4.08899 | 10 |
| -1 | -1 | -13 | 24.0111 | 3.79048 | 8  |
| 1  | -1 | 13  | 21.1502 | 4.37100 | 13 |
| -1 | 1  | -13 | 21.4318 | 4.14370 | 10 |
| 1  | 1  | 13  | 26.1312 | 4.58453 | 13 |
| -1 | 1  | -13 | 22.7626 | 3.60008 | 8  |
| -2 | -1 | -13 | 1.41371 | 1.81645 | 8  |
| -2 | -1 | -13 | 0.71170 | 1.67282 | 10 |
| 2  | -1 | 13  | 0.74593 | 3.02803 | 13 |
| -2 | 1  | -13 | -0.6271 | 2.40324 | 14 |
| -2 | 1  | -13 | 0.91806 | 1.57146 | 12 |
| -2 | 1  | -13 | -1.8726 | 1.70904 | 10 |
| 2  | 1  | 13  | 2.67717 | 3.20021 | 13 |
| -2 | 1  | -13 | -0.4698 | 1.61497 | 8  |
| -3 | -1 | -13 | 4.66206 | 1.71869 | 8  |
| -3 | -1 | -13 | 3.90281 | 2.08237 | 12 |
| -3 | 1  | -13 | 5.31244 | 2.27069 | 12 |
| -3 | 1  | -13 | 4.31968 | 1.02187 | 11 |
| 3  | 1  | 13  | 12.0516 | 3.25608 | 13 |
| -3 | 1  | -13 | 8.89545 | 2.35880 | 14 |

|    |    |     |         |         |    |
|----|----|-----|---------|---------|----|
| -3 | 1  | -13 | 5.13807 | 1.06328 | 11 |
| -3 | 1  | -13 | 5.10903 | 1.58273 | 8  |
| 4  | -1 | 13  | 5.74021 | 2.24134 | 13 |
| -4 | -1 | -13 | 4.77877 | 1.73155 | 12 |
| 4  | 1  | 13  | 0.78665 | 2.18200 | 13 |
| -4 | 1  | -13 | 4.36120 | 1.79424 | 12 |
| -8 | -2 | 13  | 16.2286 | 2.60891 | 10 |
| -8 | 2  | 13  | 16.4135 | 2.84138 | 10 |
| -7 | -2 | 13  | 7.87228 | 2.97345 | 10 |
| -7 | 2  | 13  | 4.31298 | 2.70137 | 10 |
| -6 | 2  | 13  | 19.5159 | 3.82106 | 10 |
| -5 | -2 | 13  | 14.7706 | 3.72526 | 10 |
| -5 | 2  | 13  | 14.6861 | 3.26401 | 10 |
| 5  | 2  | -13 | 18.4659 | 4.29459 | 10 |
| -4 | 2  | 13  | 136.857 | 10.7759 | 10 |
| 4  | 2  | -13 | 127.557 | 10.6353 | 10 |
| -3 | -2 | 13  | 10.7469 | 3.43118 | 13 |
| 3  | -2 | -13 | 15.2615 | 3.64788 | 10 |
| 3  | 2  | -13 | 18.9148 | 3.76708 | 10 |
| -2 | -2 | 13  | 15.6752 | 3.65683 | 13 |
| 2  | -2 | -13 | 9.62314 | 3.15218 | 10 |
| 2  | 2  | -13 | 15.9362 | 3.41952 | 10 |
| 1  | -2 | -13 | 16.7324 | 3.59025 | 10 |
| -1 | -2 | 13  | 16.4164 | 4.45306 | 13 |
| 1  | 2  | -13 | 18.4587 | 3.48236 | 10 |
| -1 | 2  | 13  | 20.4512 | 4.38485 | 13 |
| 0  | -2 | -13 | 11.2478 | 3.20729 | 10 |
| 0  | -2 | 13  | 22.6980 | 4.78914 | 13 |
| 0  | -2 | -13 | 16.6545 | 4.52612 | 1  |
| 0  | -2 | -13 | 14.2674 | 2.85754 | 8  |
| 0  | 2  | -13 | 19.6227 | 3.75337 | 10 |
| 0  | 2  | -13 | 17.2185 | 2.86215 | 8  |
| 1  | -2 | 13  | 16.5850 | 3.95957 | 13 |
| -1 | 2  | -13 | 8.80322 | 3.03211 | 14 |
| -1 | 2  | -13 | 18.0120 | 2.69685 | 8  |
| -1 | 2  | -13 | 13.5498 | 2.85189 | 12 |
| -1 | 2  | -13 | 12.1543 | 2.57395 | 10 |
| -2 | -2 | -13 | 3.24232 | 1.49840 | 8  |
| -2 | -2 | -13 | 4.49526 | 2.03881 | 10 |
| 2  | -2 | 13  | 4.13377 | 3.11303 | 13 |
| 2  | 2  | 13  | 1.11876 | 3.14831 | 13 |
| -2 | 2  | -13 | 2.54215 | 1.86223 | 14 |
| -2 | 2  | -13 | 2.81509 | 1.74083 | 8  |
| -2 | 2  | -13 | 2.03989 | 2.26967 | 12 |
| 3  | -2 | 13  | 5.69220 | 2.87649 | 13 |
| -3 | -2 | -13 | 2.82688 | 2.09911 | 12 |
| -3 | -2 | -13 | 2.89106 | 1.66865 | 8  |
| -3 | 2  | -13 | 2.86030 | 2.23993 | 12 |
| -3 | 2  | -13 | 3.17232 | 1.41395 | 8  |
| 3  | 2  | 13  | 2.28842 | 2.91197 | 13 |

|    |    |     |         |         |    |
|----|----|-----|---------|---------|----|
| -3 | 2  | -13 | 3.05274 | 0.61061 | 11 |
| -3 | 2  | -13 | 3.16639 | 2.17684 | 14 |
| -3 | 2  | -13 | 4.53413 | 0.60161 | 11 |
| 4  | -2 | 13  | 2.06369 | 2.11772 | 13 |
| -4 | -2 | -13 | 0.48216 | 1.45614 | 12 |
| 4  | 2  | 13  | -0.8435 | 2.56374 | 13 |
| -4 | 2  | -13 | 0.40361 | 1.17152 | 12 |
| -8 | -3 | 13  | 24.7045 | 3.62495 | 10 |
| -8 | 3  | 13  | 25.1543 | 3.40062 | 10 |
| -7 | -3 | 13  | 28.6064 | 3.77399 | 10 |
| -7 | 3  | 13  | 21.8692 | 3.99886 | 10 |
| -6 | -3 | 13  | 10.7544 | 3.33921 | 10 |
| -6 | 3  | 13  | 15.7992 | 3.47178 | 10 |
| 5  | 3  | -13 | 57.0439 | 6.39254 | 10 |
| -5 | 3  | 13  | 49.6872 | 6.32369 | 10 |
| -4 | 3  | 13  | 57.8484 | 6.92590 | 10 |
| 4  | 3  | -13 | 51.0875 | 5.75402 | 10 |
| -3 | -3 | 13  | 6.26403 | 3.68045 | 13 |
| 3  | -3 | -13 | 0.95648 | 2.81651 | 10 |
| 3  | 3  | -13 | 2.57623 | 2.76768 | 10 |
| 2  | -3 | -13 | 7.78038 | 3.16324 | 10 |
| -2 | -3 | 13  | 9.73711 | 3.40787 | 13 |
| 2  | 3  | -13 | 10.3826 | 3.11496 | 10 |
| 1  | -3 | -13 | 13.9765 | 4.63891 | 1  |
| -1 | -3 | 13  | 22.6388 | 4.55272 | 13 |
| 1  | -3 | -13 | 14.4054 | 3.59700 | 10 |
| -1 | 3  | 13  | 11.9361 | 4.07932 | 13 |
| 0  | -3 | 13  | 45.2971 | 6.81056 | 13 |
| 0  | -3 | -13 | 47.8159 | 5.69712 | 10 |
| 0  | -3 | -13 | 42.2680 | 7.19797 | 1  |
| 0  | 3  | -13 | 48.7575 | 5.16617 | 10 |
| -1 | -3 | -13 | 4.64622 | 2.62320 | 10 |
| -1 | -3 | -13 | 5.60568 | 2.26608 | 8  |
| 1  | -3 | 13  | 9.41729 | 3.35364 | 13 |
| -1 | 3  | -13 | 10.9506 | 2.29267 | 8  |
| -1 | 3  | -13 | 7.41811 | 2.41357 | 10 |
| -1 | 3  | -13 | 12.1679 | 2.68998 | 12 |
| -1 | 3  | -13 | 11.0074 | 2.97939 | 14 |
| 1  | 3  | 13  | 2.45864 | 4.17857 | 13 |
| -2 | -3 | -13 | 17.7680 | 3.30755 | 10 |
| -2 | -3 | -13 | 14.1934 | 2.56545 | 8  |
| 2  | -3 | 13  | 19.0514 | 3.66491 | 13 |
| -2 | 3  | -13 | 14.3987 | 2.83222 | 12 |
| -2 | 3  | -13 | 15.5346 | 2.91667 | 14 |
| -2 | 3  | -13 | 16.0593 | 2.08398 | 11 |
| 2  | 3  | 13  | 12.4400 | 3.76945 | 13 |
| -2 | 3  | -13 | 16.6136 | 2.72633 | 8  |
| -3 | -3 | -13 | 10.8392 | 2.02586 | 10 |
| -3 | -3 | -13 | 10.4583 | 2.09616 | 8  |
| 3  | -3 | 13  | 7.34097 | 2.91365 | 13 |

|    |    |     |         |         |    |
|----|----|-----|---------|---------|----|
| -3 | -3 | -13 | 12.7762 | 2.54033 | 12 |
| -3 | 3  | -13 | 10.0567 | 2.55632 | 12 |
| -3 | 3  | -13 | 13.3506 | 2.71756 | 14 |
| 3  | 3  | 13  | 12.7103 | 3.36120 | 13 |
| -4 | -3 | -13 | 0.06672 | 1.40228 | 12 |
| 4  | -3 | 13  | 1.58811 | 1.96986 | 13 |
| -4 | 3  | -13 | 1.30021 | 1.74518 | 12 |
| 4  | 3  | 13  | 0.83209 | 2.57251 | 13 |
| -8 | -4 | 13  | 6.59888 | 1.90204 | 10 |
| 8  | -4 | -13 | 9.78295 | 2.24827 | 13 |
| -8 | 4  | 13  | 8.52500 | 1.80935 | 10 |
| 7  | -4 | -13 | 69.5251 | 6.44063 | 13 |
| -7 | -4 | 13  | 48.8277 | 5.26793 | 10 |
| -7 | 4  | 13  | 58.3362 | 5.25674 | 10 |
| -6 | -4 | 13  | 1.99206 | 2.69751 | 10 |
| -6 | 4  | 13  | 5.73109 | 2.79936 | 10 |
| 5  | 4  | -13 | 28.5739 | 5.18463 | 10 |
| -5 | 4  | 13  | 31.3072 | 5.14512 | 10 |
| -4 | 4  | 13  | 0.84163 | 2.53730 | 10 |
| -3 | -4 | 13  | 27.8358 | 4.73274 | 13 |
| 3  | 4  | -13 | 23.6782 | 4.69384 | 10 |
| -3 | 4  | 13  | 20.6499 | 5.29998 | 10 |
| 2  | -4 | -13 | 6.35271 | 2.95889 | 10 |
| -2 | -4 | 13  | 1.15943 | 3.85972 | 13 |
| 2  | 4  | -13 | 2.52947 | 2.61142 | 10 |
| 2  | 4  | -13 | 5.23403 | 2.49376 | 14 |
| 1  | -4 | -13 | 136.437 | 11.4449 | 10 |
| -1 | -4 | 13  | 161.182 | 11.8551 | 13 |
| 1  | -4 | -13 | 144.872 | 13.5390 | 1  |
| -1 | 4  | 13  | 134.270 | 11.3249 | 13 |
| 1  | 4  | -13 | 164.889 | 11.0759 | 14 |
| 1  | 4  | -13 | 162.415 | 11.2607 | 10 |
| 0  | -4 | 13  | 83.6391 | 9.25144 | 13 |
| 0  | -4 | -13 | 97.4303 | 9.54720 | 1  |
| 0  | -4 | -13 | 78.1722 | 7.80514 | 10 |
| 0  | 4  | 13  | 92.8551 | 8.90414 | 13 |
| 0  | 4  | -13 | 86.7604 | 7.14980 | 10 |
| 0  | 4  | -13 | 82.9019 | 7.13021 | 12 |
| 0  | 4  | -13 | 78.6897 | 7.58944 | 14 |
| 1  | -4 | 13  | 9.34248 | 3.46428 | 13 |
| -1 | -4 | -13 | 19.4196 | 3.38816 | 10 |
| -1 | -4 | -13 | 12.2308 | 2.58151 | 8  |
| -1 | 4  | -13 | 10.9462 | 2.48063 | 10 |
| -1 | 4  | -13 | 15.3530 | 2.91413 | 12 |
| -1 | 4  | -13 | 13.5527 | 3.53342 | 14 |
| 1  | 4  | 13  | 14.6953 | 3.84350 | 13 |
| 2  | -4 | 13  | 11.1162 | 3.17944 | 13 |
| -2 | -4 | -13 | 9.70010 | 2.37248 | 8  |
| -2 | -4 | -13 | 10.6680 | 2.57068 | 10 |
| -2 | 4  | -13 | 10.8553 | 2.75556 | 14 |

|    |    |     |         |         |    |
|----|----|-----|---------|---------|----|
| -2 | 4  | -13 | 8.67588 | 1.50813 | 11 |
| 2  | 4  | 13  | 7.38343 | 3.47405 | 13 |
| -2 | 4  | -13 | 8.85662 | 2.59496 | 12 |
| -3 | -4 | -13 | -1.3198 | 1.37436 | 10 |
| -3 | -4 | -13 | 0.92616 | 1.96200 | 12 |
| -3 | -4 | -13 | 1.61517 | 1.68407 | 8  |
| 3  | -4 | 13  | 3.96143 | 2.58380 | 13 |
| 3  | 4  | 13  | 1.96901 | 2.90516 | 13 |
| -3 | 4  | -13 | 6.72540 | 2.43383 | 14 |
| -4 | -4 | -13 | 0.40985 | 1.38392 | 12 |
| 4  | -4 | 13  | 1.01703 | 1.85969 | 13 |
| -4 | -4 | -13 | 1.95612 | 0.78956 | 11 |
| -4 | 4  | -13 | -0.0144 | 1.59633 | 12 |
| 4  | 4  | 13  | 0.13516 | 2.03947 | 13 |
| -8 | -5 | 13  | 5.67815 | 2.24232 | 10 |
| 8  | -5 | -13 | 8.14116 | 2.21972 | 13 |
| -7 | -5 | 13  | 8.99713 | 2.43472 | 10 |
| 7  | -5 | -13 | 14.4718 | 2.89569 | 13 |
| -7 | 5  | 13  | 16.5697 | 2.73261 | 10 |
| -6 | -5 | 13  | 11.7620 | 2.82125 | 10 |
| 6  | -5 | -13 | -1.4098 | 2.77750 | 13 |
| 6  | 5  | -13 | 8.63578 | 2.78332 | 10 |
| -6 | 5  | 13  | 1.06875 | 2.60952 | 10 |
| -5 | 5  | 13  | 22.1322 | 4.05205 | 10 |
| 5  | 5  | -13 | 12.9564 | 3.05137 | 10 |
| 4  | 5  | -13 | 25.9122 | 5.12819 | 10 |
| -4 | 5  | 13  | 26.9759 | 4.99487 | 10 |
| -3 | -5 | 13  | 52.3855 | 6.36921 | 13 |
| 3  | 5  | -13 | 50.7878 | 6.05857 | 10 |
| -2 | -5 | 13  | 20.8585 | 4.08355 | 13 |
| 2  | -5 | -13 | 12.4054 | 3.00486 | 10 |
| 2  | 5  | -13 | 15.1714 | 3.40555 | 10 |
| 2  | 5  | -13 | 21.4572 | 3.55394 | 14 |
| -1 | -5 | 13  | 109.211 | 9.63744 | 13 |
| 1  | 5  | -13 | 113.606 | 8.77657 | 14 |
| 1  | 5  | -13 | 113.331 | 8.86152 | 10 |
| 0  | -5 | 13  | 81.7400 | 9.03050 | 13 |
| 0  | 5  | -13 | 85.9340 | 6.90718 | 10 |
| 0  | 5  | -13 | 86.1262 | 7.49467 | 14 |
| 0  | 5  | -13 | 82.8896 | 7.00545 | 12 |
| 1  | -5 | 13  | 27.6851 | 4.31689 | 13 |
| -1 | -5 | -13 | 23.7168 | 4.55712 | 10 |
| -1 | -5 | -13 | 23.4426 | 3.82047 | 8  |
| -1 | 5  | -13 | 31.6857 | 4.43649 | 14 |
| -1 | 5  | -13 | 29.8585 | 4.15906 | 12 |
| 1  | 5  | 13  | 27.7607 | 4.97442 | 13 |
| 2  | -5 | 13  | 11.4434 | 3.19545 | 13 |
| -2 | -5 | -13 | 15.4152 | 2.66704 | 8  |
| 2  | 5  | 13  | 17.9722 | 3.70850 | 13 |
| -2 | 5  | -13 | 8.19859 | 1.27761 | 11 |



|    |    |     |         |         |    |
|----|----|-----|---------|---------|----|
| -2 | 5  | -13 | 6.34048 | 2.66673 | 12 |
| -2 | 5  | -13 | 8.66244 | 1.37675 | 11 |
| -2 | 5  | -13 | 9.15535 | 2.77032 | 14 |
| -3 | -5 | -13 | 6.13381 | 2.13287 | 10 |
| -3 | -5 | -13 | 6.49128 | 2.12257 | 12 |
| -3 | -5 | -13 | 6.85782 | 1.95444 | 8  |
| 3  | -5 | 13  | 7.53249 | 2.63754 | 13 |
| -3 | 5  | -13 | 8.31493 | 2.32705 | 12 |
| -3 | 5  | -13 | 14.3434 | 2.74948 | 14 |
| 3  | 5  | 13  | 7.91057 | 2.94217 | 13 |
| 4  | -5 | 13  | 1.39637 | 2.17031 | 13 |
| 4  | 5  | 13  | 0.10829 | 2.00905 | 13 |
| -4 | 5  | -13 | 0.46586 | 1.60554 | 12 |
| 8  | -6 | -13 | 14.6540 | 4.65793 | 13 |
| 7  | -6 | -13 | 26.3622 | 4.33224 | 13 |
| -7 | -6 | 13  | 33.0416 | 3.88782 | 10 |
| -7 | 6  | 13  | 27.8496 | 3.75630 | 10 |
| 6  | -6 | -13 | 8.10187 | 2.99966 | 13 |
| 6  | 6  | -13 | 15.3573 | 3.48336 | 10 |
| -6 | 6  | 13  | 8.22055 | 2.88569 | 10 |
| -5 | 6  | 13  | 25.1314 | 4.45911 | 10 |
| -4 | -6 | 13  | 78.4328 | 7.58078 | 13 |
| -4 | 6  | 13  | 94.5183 | 8.77373 | 10 |
| 4  | 6  | -13 | 81.4752 | 7.35313 | 10 |
| -3 | -6 | 13  | 38.2137 | 5.88562 | 13 |
| 3  | 6  | -13 | 37.2598 | 5.28722 | 10 |
| -3 | 6  | 13  | 29.8884 | 5.52377 | 10 |
| -2 | -6 | 13  | 83.4408 | 8.14175 | 13 |
| 2  | -6 | -13 | 76.5762 | 7.73475 | 10 |
| 2  | 6  | -13 | 83.7560 | 7.01720 | 14 |
| 2  | 6  | -13 | 85.3677 | 7.38559 | 10 |
| 1  | -6 | -13 | 16.0322 | 3.83314 | 10 |
| 1  | -6 | -13 | 18.5193 | 4.96029 | 1  |
| -1 | -6 | 13  | 7.05131 | 3.73192 | 13 |
| 1  | 6  | -13 | 9.14010 | 2.98793 | 14 |
| 1  | 6  | -13 | 13.2486 | 3.11714 | 10 |
| 0  | -6 | 13  | 32.6089 | 5.91553 | 13 |
| 0  | 6  | -13 | 36.5163 | 4.06227 | 10 |
| 0  | 6  | -13 | 33.1891 | 4.89641 | 14 |
| 1  | -6 | 13  | 5.51230 | 3.20575 | 13 |
| -1 | 6  | -13 | 1.48461 | 1.84402 | 11 |
| -1 | 6  | -13 | 8.03895 | 2.80122 | 14 |
| 1  | 6  | 13  | 2.87825 | 3.83597 | 13 |
| -1 | 6  | -13 | 1.06784 | 2.27923 | 12 |
| -2 | -6 | -13 | 4.98802 | 2.59506 | 10 |
| -2 | -6 | -13 | 7.51626 | 2.46121 | 8  |
| 2  | -6 | 13  | 9.22608 | 3.18369 | 13 |
| -2 | 6  | -13 | 7.46122 | 2.03584 | 12 |
| 2  | 6  | 13  | 3.94192 | 3.19609 | 13 |
| -2 | 6  | -13 | 7.24984 | 2.84053 | 14 |

|    |    |     |         |         |    |
|----|----|-----|---------|---------|----|
| -3 | -6 | -13 | 9.12071 | 2.09770 | 8  |
| -3 | -6 | -13 | 12.1923 | 2.27718 | 12 |
| 3  | -6 | 13  | 9.67831 | 2.62311 | 13 |
| -3 | -6 | -13 | 12.2947 | 2.38736 | 10 |
| 3  | 6  | 13  | 9.38677 | 2.91458 | 13 |
| -3 | 6  | -13 | 12.9678 | 2.60495 | 14 |
| -3 | 6  | -13 | 11.3198 | 1.99715 | 12 |
| -4 | 6  | -13 | 12.3217 | 2.09640 | 12 |
| 4  | 6  | 13  | 7.65900 | 2.28288 | 13 |
| 7  | -7 | -13 | 22.6170 | 3.61692 | 13 |
| -7 | -7 | 13  | 19.7135 | 3.96011 | 10 |
| -7 | 7  | 13  | 20.6425 | 3.17085 | 10 |
| 6  | -7 | -13 | 12.0161 | 3.02205 | 13 |
| -6 | 7  | 13  | 10.0546 | 2.46318 | 10 |
| 6  | 7  | -13 | 11.2135 | 2.71693 | 10 |
| 5  | -7 | -13 | 37.7803 | 5.89306 | 13 |
| 5  | 7  | -13 | 27.3044 | 4.94937 | 10 |
| -5 | 7  | 13  | 25.4906 | 4.96850 | 10 |
| -4 | -7 | 13  | 74.8621 | 7.33488 | 13 |
| 4  | 7  | -13 | 79.2487 | 6.91376 | 10 |
| -4 | 7  | 13  | 80.1382 | 7.51463 | 10 |
| -3 | -7 | 13  | 46.5093 | 6.10684 | 13 |
| 3  | 7  | -13 | 42.5732 | 5.64080 | 10 |
| -3 | 7  | 13  | 51.4020 | 6.95391 | 10 |
| 2  | -7 | -13 | 50.9907 | 8.12458 | 10 |
| 2  | 7  | -13 | 57.3917 | 5.85322 | 10 |
| -2 | 7  | 13  | 51.0906 | 6.57151 | 10 |
| 2  | 7  | -13 | 60.6661 | 8.67648 | 14 |
| -1 | -7 | 13  | 108.505 | 9.73527 | 13 |
| 1  | 7  | -13 | 109.126 | 8.49785 | 10 |
| 1  | 7  | -13 | 114.564 | 9.23209 | 14 |
| 0  | -7 | 13  | 174.537 | 12.6591 | 13 |
| 0  | -7 | -13 | 147.691 | 12.3805 | 10 |
| 0  | 7  | -13 | 180.139 | 12.0700 | 14 |
| 0  | 7  | -13 | 173.963 | 11.5329 | 10 |
| 1  | -7 | 13  | 2.45062 | 2.76535 | 13 |
| -1 | -7 | -13 | -0.8207 | 2.49913 | 10 |
| -1 | 7  | -13 | 3.31828 | 1.19363 | 11 |
| -1 | 7  | -13 | 2.82474 | 2.07448 | 12 |
| 1  | 7  | 13  | 2.14603 | 2.70877 | 13 |
| -1 | 7  | -13 | 1.25519 | 2.29574 | 14 |
| -2 | -7 | -13 | 37.9685 | 4.23707 | 8  |
| 2  | -7 | 13  | 33.5621 | 4.97469 | 13 |
| -2 | -7 | -13 | 39.8428 | 4.58969 | 10 |
| -2 | 7  | -13 | 32.3457 | 4.92765 | 14 |
| 2  | 7  | 13  | 46.0447 | 6.05003 | 13 |
| -2 | 7  | -13 | 35.7097 | 4.27806 | 12 |
| -3 | -7 | -13 | 27.0842 | 3.38517 | 8  |
| 3  | -7 | 13  | 25.1871 | 4.10830 | 13 |
| -3 | -7 | -13 | 28.7434 | 3.41343 | 12 |

|    |    |     |         |         |    |
|----|----|-----|---------|---------|----|
| -3 | -7 | -13 | 27.0531 | 3.27261 | 10 |
| 3  | 7  | 13  | 28.4372 | 5.04085 | 13 |
| -3 | 7  | -13 | 30.7045 | 3.74955 | 12 |
| -3 | 7  | -13 | 31.9657 | 4.14549 | 14 |
| -7 | -8 | 13  | 15.1482 | 2.87281 | 10 |
| 7  | 8  | -13 | 14.8568 | 2.86840 | 10 |
| 6  | -8 | -13 | 6.32957 | 2.68650 | 13 |
| 6  | 8  | -13 | 12.4317 | 3.17414 | 10 |
| -6 | 8  | 13  | 4.44156 | 2.37126 | 10 |
| 5  | -8 | -13 | 19.8341 | 4.13569 | 13 |
| -5 | 8  | 13  | 16.3108 | 3.21535 | 10 |
| -4 | -8 | 13  | 14.8723 | 3.35138 | 13 |
| -4 | 8  | 13  | 5.86968 | 3.59242 | 10 |
| 4  | 8  | -13 | 15.5553 | 3.71629 | 10 |
| -3 | -8 | 13  | 36.0126 | 5.80500 | 13 |
| -3 | 8  | 13  | 41.2107 | 6.30374 | 10 |
| 3  | 8  | -13 | 38.5150 | 5.15698 | 10 |
| -2 | -8 | 13  | -2.0317 | 3.10595 | 13 |
| -2 | 8  | 13  | 8.63219 | 3.85362 | 10 |
| 2  | 8  | -13 | 1.46257 | 2.46882 | 10 |
| 1  | -8 | -13 | 154.358 | 11.8241 | 10 |
| -1 | -8 | 13  | 150.836 | 11.9864 | 13 |
| 1  | 8  | -13 | 152.786 | 10.9836 | 10 |
| 1  | 8  | -13 | 160.148 | 11.1921 | 14 |
| 0  | -8 | 13  | 34.4552 | 5.81078 | 13 |
| 0  | 8  | -13 | 37.9353 | 5.06420 | 14 |
| 0  | 8  | -13 | 35.7985 | 3.68597 | 11 |
| -1 | -8 | -13 | 4.17926 | 2.81165 | 10 |
| 1  | -8 | 13  | 2.67895 | 2.62657 | 13 |
| -1 | 8  | -13 | 0.35759 | 2.02217 | 12 |
| -1 | 8  | -13 | 0.96402 | 1.07633 | 11 |
| -1 | 8  | -13 | 0.41577 | 1.05090 | 11 |
| -1 | 8  | -13 | -1.5149 | 2.38790 | 14 |
| -2 | -8 | -13 | 6.55321 | 2.53603 | 10 |
| 2  | -8 | 13  | 2.23913 | 2.44904 | 13 |
| 2  | 8  | 13  | 1.88841 | 3.12966 | 13 |
| -2 | 8  | -13 | 2.09110 | 2.09041 | 12 |
| -2 | 8  | -13 | 4.02118 | 2.50008 | 14 |
| -3 | -8 | -13 | 12.8942 | 2.56331 | 10 |
| 3  | -8 | 13  | 12.0869 | 2.47685 | 13 |
| -3 | -8 | -13 | 10.6865 | 2.01173 | 12 |
| 3  | 8  | 13  | 12.7908 | 3.08573 | 13 |
| -3 | 8  | -13 | 13.5234 | 2.41279 | 12 |
| -3 | 8  | -13 | 16.5904 | 2.57114 | 14 |
| 7  | -9 | -13 | 9.11734 | 2.41790 | 13 |
| 7  | 9  | -13 | 6.08835 | 2.55258 | 10 |
| -7 | 9  | 13  | 7.70138 | 1.83328 | 10 |
| 6  | -9 | -13 | 9.02481 | 2.89419 | 13 |
| 6  | 9  | -13 | 12.0090 | 2.72876 | 10 |
| -6 | 9  | 13  | 8.76111 | 2.57276 | 10 |

|    |     |     |         |         |    |
|----|-----|-----|---------|---------|----|
| 5  | -9  | -13 | 50.8999 | 5.91831 | 13 |
| 5  | 9   | -13 | 40.8810 | 5.64217 | 10 |
| -5 | 9   | 13  | 44.2882 | 5.09122 | 10 |
| -4 | -9  | 13  | 74.1244 | 6.73648 | 13 |
| 4  | 9   | -13 | 72.9488 | 6.85652 | 10 |
| -4 | 9   | 13  | 64.9204 | 7.43887 | 10 |
| -3 | -9  | 13  | 49.9322 | 6.34794 | 13 |
| -3 | 9   | 13  | 63.1699 | 7.13182 | 10 |
| 3  | 9   | -13 | 46.1175 | 5.68556 | 10 |
| -2 | -9  | 13  | 11.5430 | 3.57832 | 13 |
| 2  | 9   | -13 | 14.0064 | 3.03271 | 10 |
| -2 | 9   | 13  | 19.5384 | 4.24477 | 10 |
| -1 | -9  | 13  | 18.2734 | 4.06996 | 13 |
| 1  | 9   | -13 | 18.2202 | 3.20950 | 10 |
| 0  | -9  | 13  | 1.40125 | 3.00153 | 13 |
| 0  | -9  | -13 | 2.33744 | 2.89154 | 10 |
| 0  | 9   | -13 | 1.15359 | 2.55046 | 14 |
| 0  | 9   | -13 | 3.18439 | 1.45855 | 11 |
| 1  | -9  | 13  | 0.72147 | 2.65126 | 13 |
| -1 | -9  | -13 | -0.5870 | 2.01218 | 10 |
| -1 | 9   | -13 | 0.01592 | 2.60825 | 14 |
| 2  | -9  | 13  | 0.03994 | 2.30191 | 13 |
| -2 | -9  | -13 | 0.30011 | 2.38120 | 10 |
| -2 | 9   | -13 | 2.07651 | 2.39954 | 14 |
| -2 | 9   | -13 | 0.54868 | 2.01135 | 12 |
| -3 | -9  | -13 | 1.59961 | 1.71167 | 10 |
| -3 | -9  | -13 | 2.54308 | 1.46600 | 12 |
| -3 | 9   | -13 | 3.18510 | 1.76391 | 12 |
| -3 | 9   | -13 | 5.16837 | 1.98915 | 14 |
| 7  | -10 | -13 | 16.1655 | 3.04362 | 13 |
| -7 | 10  | 13  | 17.4291 | 1.87914 | 11 |
| 7  | 10  | -13 | 26.4321 | 4.13693 | 10 |
| 6  | -10 | -13 | 34.4980 | 4.41217 | 13 |
| 6  | 10  | -13 | 22.0341 | 3.60973 | 10 |
| -6 | 10  | 13  | 32.0068 | 3.71973 | 10 |
| 5  | -10 | -13 | 41.4632 | 5.12891 | 13 |
| -5 | 10  | 13  | 39.6518 | 5.11018 | 10 |
| -4 | -10 | 13  | 37.5777 | 5.16020 | 13 |
| 4  | -10 | -13 | 37.5265 | 4.94186 | 13 |
| 4  | 10  | -13 | 35.7477 | 4.98323 | 10 |
| -4 | 10  | 13  | 40.8274 | 4.95707 | 10 |
| -3 | -10 | 13  | 45.8585 | 6.09441 | 13 |
| -3 | 10  | 13  | 35.5703 | 6.17562 | 10 |
| 3  | 10  | -13 | 47.0483 | 5.12856 | 10 |
| -2 | -10 | 13  | 5.79672 | 3.88478 | 13 |
| -2 | 10  | 13  | 19.9124 | 4.38446 | 10 |
| 2  | 10  | -13 | 9.35915 | 2.68175 | 10 |
| 1  | -10 | -13 | 13.6713 | 3.00343 | 10 |
| -1 | 10  | 13  | 14.3767 | 3.49364 | 10 |
| 0  | -10 | 13  | 73.9696 | 7.83427 | 13 |

|    |     |     |         |         |    |
|----|-----|-----|---------|---------|----|
| 0  | -10 | -13 | 77.3887 | 6.73004 | 10 |
| 0  | 10  | -13 | 75.1908 | 5.37201 | 11 |
| 0  | 10  | -13 | 70.6335 | 6.81096 | 14 |
| -1 | -10 | -13 | 9.07348 | 3.08803 | 10 |
| 1  | -10 | 13  | 17.8164 | 3.27874 | 13 |
| -1 | 10  | -13 | 14.8533 | 3.04673 | 14 |
| 2  | -10 | 13  | 7.20384 | 2.41915 | 13 |
| -2 | -10 | -13 | 1.93527 | 2.38735 | 10 |
| -2 | 10  | -13 | 9.38043 | 2.46787 | 14 |
| -2 | 10  | -13 | 8.15568 | 2.09846 | 12 |
| -3 | -10 | -13 | 7.77409 | 2.15546 | 12 |
| -3 | -10 | -13 | 5.94695 | 1.52752 | 10 |
| -3 | 10  | -13 | 8.21733 | 2.11987 | 14 |
| -3 | 10  | -13 | 7.73305 | 1.85904 | 12 |
| 7  | -11 | -13 | 39.1326 | 4.21624 | 13 |
| 6  | -11 | -13 | 7.97023 | 2.54473 | 13 |
| -6 | 11  | 13  | 8.72593 | 2.11120 | 10 |
| 6  | 11  | -13 | 6.64081 | 2.69083 | 10 |
| 5  | -11 | -13 | 12.7912 | 3.00328 | 13 |
| -5 | 11  | 13  | 10.8531 | 2.89264 | 10 |
| 4  | -11 | -13 | 11.9088 | 3.14212 | 13 |
| -4 | -11 | 13  | 12.4564 | 3.59593 | 13 |
| -4 | 11  | 13  | 11.0158 | 3.68941 | 10 |
| 4  | 11  | -13 | 11.7437 | 2.77250 | 10 |
| -3 | -11 | 13  | 47.7398 | 6.48532 | 13 |
| -3 | 11  | 13  | 29.0278 | 4.68734 | 10 |
| 3  | 11  | -13 | 40.0815 | 4.63326 | 10 |
| -2 | -11 | 13  | 30.9595 | 4.70210 | 13 |
| -2 | 11  | 13  | 24.6773 | 4.46947 | 10 |
| 2  | 11  | -13 | 31.4296 | 3.80648 | 10 |
| -1 | -11 | 13  | 41.0661 | 5.73142 | 13 |
| 1  | 11  | -13 | 42.5991 | 4.21486 | 11 |
| 1  | 11  | -13 | 45.6207 | 5.57807 | 14 |
| -1 | 11  | 13  | 57.1893 | 5.85722 | 10 |
| 0  | -11 | 13  | 60.8386 | 6.59021 | 13 |
| 0  | -11 | -13 | 59.5726 | 5.84696 | 10 |
| 0  | 11  | -13 | 50.6707 | 6.24159 | 14 |
| 0  | 11  | -13 | 57.7397 | 4.16755 | 11 |
| 0  | 11  | -13 | 54.9395 | 4.17271 | 11 |
| -1 | -11 | -13 | 40.3420 | 5.15344 | 10 |
| 1  | -11 | 13  | 52.6045 | 5.49136 | 13 |
| -1 | 11  | -13 | 39.5735 | 4.93495 | 14 |
| -2 | -11 | -13 | 3.15105 | 2.34945 | 10 |
| 2  | -11 | 13  | 5.64534 | 2.63362 | 13 |
| -2 | 11  | -13 | 4.59950 | 2.25425 | 14 |
| -2 | 11  | -13 | 5.33546 | 1.87718 | 12 |
| -3 | -11 | -13 | 4.05405 | 1.69159 | 10 |
| -3 | 11  | -13 | 2.66120 | 2.00756 | 12 |
| -3 | 11  | -13 | 2.11965 | 1.73188 | 14 |
| 6  | -12 | -13 | 8.60859 | 2.36556 | 13 |

|    |     |     |         |         |    |
|----|-----|-----|---------|---------|----|
| -6 | 12  | 13  | 6.44206 | 1.85617 | 10 |
| 6  | 12  | -13 | 9.74949 | 2.19774 | 10 |
| 5  | -12 | -13 | 22.6884 | 4.24273 | 13 |
| -5 | 12  | 13  | 27.8114 | 3.88041 | 10 |
| 4  | -12 | -13 | 3.36811 | 2.44704 | 13 |
| -4 | 12  | 13  | 6.31650 | 2.37201 | 10 |
| -3 | 12  | 13  | 25.9266 | 4.33116 | 10 |
| 3  | 12  | -13 | 22.8154 | 3.92848 | 10 |
| -2 | -12 | 13  | 14.6725 | 3.53499 | 13 |
| -2 | 12  | 13  | 22.4344 | 4.50996 | 10 |
| 2  | 12  | -13 | 22.2406 | 3.46809 | 10 |
| 1  | 12  | -13 | 98.4626 | 7.01604 | 11 |
| 1  | 12  | -13 | 96.6249 | 8.05516 | 14 |
| 0  | -12 | -13 | 28.8692 | 3.94637 | 10 |
| 0  | -12 | 13  | 24.7973 | 4.70384 | 13 |
| 0  | 12  | -13 | 24.5322 | 3.49138 | 14 |
| -1 | -12 | -13 | 18.0216 | 3.17959 | 10 |
| 1  | -12 | 13  | 19.9317 | 3.54060 | 13 |
| -1 | 12  | -13 | 15.9671 | 2.94176 | 14 |
| -2 | -12 | -13 | 12.8767 | 2.69020 | 10 |
| -2 | 12  | -13 | 10.2171 | 2.43251 | 14 |
| 6  | -13 | -13 | 14.4534 | 2.50833 | 13 |
| -6 | 13  | 13  | 14.3579 | 1.68297 | 11 |
| 6  | 13  | -13 | 8.51995 | 2.59940 | 10 |
| 5  | -13 | -13 | 22.8324 | 3.80107 | 13 |
| -5 | 13  | 13  | 22.5691 | 3.25916 | 10 |
| 5  | 13  | -13 | 16.4273 | 3.15496 | 10 |
| 4  | -13 | -13 | 24.2714 | 3.70046 | 13 |
| -4 | -13 | 13  | 27.3934 | 4.27817 | 13 |
| 4  | 13  | -13 | 23.9911 | 3.92183 | 10 |
| -4 | 13  | 13  | 27.3895 | 4.44341 | 10 |
| -3 | -13 | 13  | 11.6322 | 2.95388 | 13 |
| 3  | 13  | -13 | 10.6990 | 2.54189 | 10 |
| -2 | -13 | 13  | 28.8157 | 5.18212 | 13 |
| -2 | 13  | 13  | 29.6060 | 5.03152 | 10 |
| 2  | 13  | -13 | 19.7240 | 2.70004 | 11 |
| -1 | -13 | 13  | 7.56375 | 2.84891 | 13 |
| 1  | 13  | -13 | 9.99967 | 2.70394 | 14 |
| -1 | 13  | 13  | 12.3379 | 3.71496 | 10 |
| 1  | 13  | -13 | 9.93160 | 1.49959 | 11 |
| 0  | -13 | 13  | 30.3748 | 4.53951 | 13 |
| -1 | -13 | -13 | 3.55626 | 1.96580 | 10 |
| 1  | -13 | 13  | 2.95123 | 2.54933 | 13 |
| -1 | 13  | -13 | 4.00741 | 1.70641 | 14 |
| -2 | -13 | -13 | 5.24233 | 1.78219 | 10 |
| -2 | 13  | -13 | 7.32096 | 2.11316 | 14 |
| 6  | -14 | -13 | 2.74679 | 2.33207 | 13 |
| 5  | -14 | -13 | 18.7007 | 3.35060 | 13 |
| 5  | 14  | -13 | 14.1196 | 2.62627 | 10 |
| -5 | 14  | 13  | 19.8890 | 2.95548 | 10 |

|    |     |     |         |         |    |
|----|-----|-----|---------|---------|----|
| 4  | -14 | -13 | 11.4379 | 2.73516 | 13 |
| -4 | -14 | 13  | 7.47437 | 2.28297 | 13 |
| 4  | 14  | -13 | 8.06886 | 2.34172 | 10 |
| -4 | 14  | 13  | 10.2180 | 2.75323 | 10 |
| -3 | -14 | 13  | 5.11517 | 2.50461 | 13 |
| -3 | 14  | 13  | 3.20463 | 2.89486 | 10 |
| -2 | -14 | 13  | 1.84756 | 2.47608 | 13 |
| 2  | 14  | -13 | -0.2076 | 1.72923 | 11 |
| -2 | 14  | 13  | 1.65234 | 2.89259 | 10 |
| -1 | -14 | 13  | 12.4495 | 2.95768 | 13 |
| -1 | 14  | 13  | 13.9925 | 3.24500 | 10 |
| 1  | 14  | -13 | 11.2120 | 2.67337 | 14 |
| 0  | -14 | 13  | 9.12402 | 2.51143 | 13 |
| 0  | 14  | -13 | 10.6630 | 2.51629 | 14 |
| 0  | 14  | 13  | 6.48777 | 2.47688 | 10 |
| 1  | -14 | 13  | 24.3928 | 4.08865 | 13 |
| -1 | -14 | -13 | 18.6354 | 3.03233 | 10 |
| -1 | 14  | -13 | 22.1056 | 3.68598 | 14 |
| -2 | 14  | -13 | 0.88700 | 1.31566 | 14 |
| 5  | -15 | -13 | 16.7839 | 2.47751 | 13 |
| 5  | 15  | -13 | 16.0293 | 2.93576 | 10 |
| 4  | -15 | -13 | 1.64790 | 1.78092 | 13 |
| -4 | -15 | 13  | -0.0458 | 1.73361 | 13 |
| -4 | 15  | 13  | 0.66256 | 1.82298 | 10 |
| 4  | 15  | -13 | 3.24889 | 2.10494 | 10 |
| -3 | -15 | 13  | 21.7893 | 3.12151 | 13 |
| 3  | 15  | -13 | 18.7478 | 2.33270 | 11 |
| -3 | 15  | 13  | 15.8568 | 3.11484 | 10 |
| -2 | -15 | 13  | 20.6406 | 3.17024 | 13 |
| -2 | 15  | 13  | 14.0694 | 3.47905 | 10 |
| 2  | 15  | -13 | 22.0976 | 2.38456 | 11 |
| -1 | -15 | 13  | 1.71677 | 2.16676 | 13 |
| 1  | 15  | -13 | 1.95793 | 2.03914 | 14 |
| -1 | 15  | 13  | -0.3847 | 1.96676 | 10 |
| 0  | -15 | 13  | 12.2659 | 2.47161 | 13 |
| 0  | 15  | -13 | 15.2914 | 2.57547 | 14 |
| 0  | 15  | 13  | 11.4036 | 2.67133 | 10 |
| 1  | -15 | 13  | 19.5224 | 3.56512 | 13 |
| -1 | 15  | -13 | 17.4515 | 2.57881 | 14 |
| 4  | -16 | -13 | 1.84425 | 1.59257 | 13 |
| -4 | -16 | 13  | 1.97353 | 2.01414 | 13 |
| -4 | 16  | 13  | 0.68131 | 1.53285 | 10 |
| -3 | -16 | 13  | 7.67507 | 2.21824 | 13 |
| -3 | 16  | 13  | 11.4311 | 2.73117 | 10 |
| 3  | 16  | -13 | 7.16787 | 1.65087 | 11 |
| -2 | -16 | 13  | 3.49942 | 2.11029 | 13 |
| -2 | 16  | 13  | 7.15196 | 2.19845 | 10 |
| -1 | -16 | 13  | 9.37922 | 2.36689 | 13 |
| -1 | 16  | 13  | 12.7071 | 2.66913 | 10 |
| 1  | 16  | -13 | 10.7071 | 2.22774 | 14 |

|    |     |     |         |         |    |
|----|-----|-----|---------|---------|----|
| 0  | -16 | 13  | 4.35915 | 1.90578 | 13 |
| 0  | 16  | 13  | 3.46332 | 2.67594 | 10 |
| 0  | 16  | -13 | 5.29510 | 1.89926 | 14 |
| -4 | -17 | 13  | 2.01525 | 1.59155 | 13 |
| -3 | -17 | 13  | 7.77118 | 2.00723 | 13 |
| 3  | 17  | -13 | 8.98400 | 1.15317 | 11 |
| 3  | 17  | -13 | 9.95874 | 1.44182 | 11 |
| -3 | 17  | 13  | 7.88289 | 2.16629 | 10 |
| -2 | -17 | 13  | 4.22044 | 1.92224 | 13 |
| -2 | 17  | 13  | 3.08327 | 2.33635 | 10 |
| -1 | -17 | 13  | 6.06767 | 2.28952 | 13 |
| -1 | 17  | 13  | 2.23096 | 1.72153 | 10 |
| 0  | -17 | 13  | 10.4680 | 2.36614 | 13 |
| 0  | 17  | -13 | 10.8473 | 2.03787 | 14 |
| -7 | 0   | 14  | 18.3602 | 3.66420 | 10 |
| -6 | 0   | 14  | 2.89366 | 2.76500 | 10 |
| -5 | 0   | 14  | 3.05097 | 2.13399 | 10 |
| 4  | 0   | -14 | 15.1702 | 3.83951 | 10 |
| 3  | 0   | -14 | 4.69948 | 3.09927 | 10 |
| 2  | 0   | -14 | 5.95082 | 2.31282 | 10 |
| -2 | 0   | 14  | 3.45190 | 3.04254 | 13 |
| 1  | 0   | -14 | 59.1619 | 6.24449 | 10 |
| -1 | 0   | 14  | 59.9062 | 7.67601 | 13 |
| 0  | 0   | -14 | 203.948 | 14.1869 | 10 |
| 0  | 0   | -14 | 207.340 | 13.8060 | 8  |
| 0  | 0   | 14  | 203.114 | 14.6908 | 13 |
| -1 | 0   | -14 | 1.75822 | 2.76010 | 14 |
| -1 | 0   | -14 | 4.83353 | 2.42943 | 12 |
| 1  | 0   | 14  | -3.6765 | 3.20900 | 13 |
| -1 | 0   | -14 | 0.71510 | 2.07342 | 10 |
| -1 | 0   | -14 | 0.01775 | 2.01637 | 8  |
| 2  | 0   | 14  | -0.3526 | 2.86567 | 13 |
| -2 | 0   | -14 | -2.3059 | 2.16506 | 14 |
| -2 | 0   | -14 | -2.0780 | 1.42332 | 12 |
| -2 | 0   | -14 | 0.76528 | 1.32720 | 11 |
| -2 | 0   | -14 | 1.31211 | 1.22197 | 8  |
| 3  | 0   | 14  | 0.13217 | 2.13452 | 13 |
| -3 | 0   | -14 | 0.82270 | 1.69141 | 12 |
| -7 | 1   | 14  | 15.4989 | 3.00068 | 10 |
| -6 | -1  | 14  | 0.14288 | 1.88789 | 10 |
| -6 | 1   | 14  | -0.2305 | 1.86120 | 10 |
| -5 | -1  | 14  | 16.3900 | 3.23787 | 10 |
| 5  | 1   | -14 | 14.5863 | 2.97771 | 10 |
| 4  | -1  | -14 | 4.51187 | 3.41423 | 10 |
| 4  | 1   | -14 | 4.38922 | 3.17890 | 10 |
| 3  | -1  | -14 | 30.4703 | 5.20085 | 10 |
| 3  | 1   | -14 | 35.2013 | 5.17087 | 10 |
| -2 | -1  | 14  | 78.1951 | 7.43676 | 13 |
| 2  | -1  | -14 | 61.3810 | 6.92905 | 10 |
| 2  | 1   | -14 | 78.9173 | 7.16368 | 10 |



|    |    |     |         |         |    |
|----|----|-----|---------|---------|----|
| 1  | -1 | -14 | 166.591 | 12.0731 | 10 |
| -1 | -1 | 14  | 170.524 | 12.7280 | 13 |
| 1  | 1  | -14 | 169.882 | 12.3122 | 10 |
| -1 | 1  | 14  | 169.342 | 12.5143 | 13 |
| 0  | -1 | -14 | 128.969 | 9.27479 | 8  |
| 0  | -1 | 14  | 131.047 | 10.3898 | 13 |
| 0  | -1 | -14 | 128.463 | 9.68054 | 10 |
| 0  | 1  | -14 | 121.635 | 9.52909 | 10 |
| -1 | -1 | -14 | 27.9427 | 3.86218 | 8  |
| -1 | -1 | -14 | 21.5396 | 3.79115 | 10 |
| 1  | -1 | 14  | 31.2338 | 4.63056 | 13 |
| -1 | 1  | -14 | 30.0208 | 3.71077 | 10 |
| -1 | 1  | -14 | 33.1380 | 3.83494 | 8  |
| -1 | 1  | -14 | 30.9536 | 4.01378 | 14 |
| -1 | 1  | -14 | 32.0483 | 4.30844 | 12 |
| 1  | 1  | 14  | 26.9019 | 4.49664 | 13 |
| -2 | -1 | -14 | -0.3565 | 1.61727 | 10 |
| -2 | -1 | -14 | 0.86063 | 1.22442 | 8  |
| -2 | -1 | -14 | -0.6482 | 1.94599 | 12 |
| -2 | -1 | -14 | -0.8443 | 2.20164 | 14 |
| 2  | -1 | 14  | -1.0384 | 2.73790 | 13 |
| -2 | 1  | -14 | 0.05644 | 1.49222 | 12 |
| -2 | 1  | -14 | -1.1980 | 1.48760 | 8  |
| -2 | 1  | -14 | 5.66757 | 2.27480 | 14 |
| -2 | 1  | -14 | -1.8099 | 1.10358 | 11 |
| 2  | 1  | 14  | -1.7432 | 2.77433 | 13 |
| 3  | -1 | 14  | 14.0882 | 2.68401 | 13 |
| -3 | -1 | -14 | 13.5700 | 1.05196 | 11 |
| -3 | -1 | -14 | 11.6217 | 1.03250 | 11 |
| -3 | -1 | -14 | 18.1245 | 2.90393 | 12 |
| 3  | 1  | 14  | 14.4199 | 3.09258 | 13 |
| -7 | -2 | 14  | 66.3610 | 5.93535 | 10 |
| -7 | 2  | 14  | 59.0099 | 5.65292 | 10 |
| -6 | -2 | 14  | 17.2065 | 3.35169 | 10 |
| -6 | 2  | 14  | 19.8086 | 3.44019 | 10 |
| 5  | 2  | -14 | 12.3943 | 3.41755 | 10 |
| -5 | 2  | 14  | 18.9443 | 3.37823 | 10 |
| 4  | 2  | -14 | 33.3890 | 5.39860 | 10 |
| -4 | 2  | 14  | 42.5975 | 5.80206 | 10 |
| 3  | -2 | -14 | 13.0752 | 3.60523 | 10 |
| 3  | 2  | -14 | 12.4814 | 3.35265 | 10 |
| 2  | -2 | -14 | 19.4190 | 3.32869 | 10 |
| -2 | -2 | 14  | 19.0964 | 3.85669 | 13 |
| 2  | 2  | -14 | 17.9046 | 3.69401 | 10 |
| 1  | -2 | -14 | 32.2595 | 4.63344 | 10 |
| -1 | -2 | 14  | 32.2853 | 5.87114 | 13 |
| -1 | 2  | 14  | 26.2953 | 4.16332 | 13 |
| 1  | 2  | -14 | 22.4878 | 4.34688 | 10 |
| 0  | -2 | -14 | 39.9496 | 4.35279 | 8  |
| 0  | -2 | 14  | 38.0607 | 5.90276 | 13 |

|    |    |     |         |         |    |
|----|----|-----|---------|---------|----|
| 0  | -2 | -14 | 41.5345 | 4.76698 | 10 |
| 0  | 2  | -14 | 32.3622 | 4.93664 | 14 |
| 0  | 2  | -14 | 38.5318 | 4.38028 | 12 |
| 0  | 2  | -14 | 31.2685 | 4.32360 | 10 |
| 0  | 2  | 14  | 36.3841 | 5.65637 | 13 |
| -1 | -2 | -14 | 23.9417 | 3.72878 | 8  |
| -1 | -2 | -14 | 24.6963 | 3.15613 | 10 |
| 1  | -2 | 14  | 13.7072 | 4.01293 | 13 |
| -2 | -2 | -14 | 4.80534 | 2.18839 | 12 |
| -2 | -2 | -14 | 6.46667 | 1.93393 | 8  |
| -2 | -2 | -14 | 6.03106 | 2.48899 | 14 |
| 2  | -2 | 14  | 7.56344 | 3.05536 | 13 |
| -2 | -2 | -14 | 3.92753 | 1.64279 | 10 |
| -2 | 2  | -14 | 7.60587 | 2.27996 | 12 |
| 2  | 2  | 14  | 0.59571 | 2.80358 | 13 |
| -2 | 2  | -14 | 5.70400 | 1.34593 | 11 |
| -2 | 2  | -14 | 6.18517 | 2.37268 | 14 |
| -3 | -2 | -14 | 11.3201 | 2.10780 | 12 |
| 3  | -2 | 14  | 10.0897 | 2.85808 | 13 |
| -3 | -2 | -14 | 10.5024 | 1.20400 | 11 |
| -3 | -2 | -14 | 11.8642 | 1.49972 | 11 |
| 3  | 2  | 14  | 7.74467 | 2.41540 | 13 |
| -3 | 2  | -14 | 8.48854 | 2.06456 | 12 |
| -3 | 2  | -14 | 10.6976 | 2.07032 | 14 |
| -7 | -3 | 14  | 15.7354 | 2.79675 | 10 |
| -6 | -3 | 14  | 16.6539 | 3.08256 | 10 |
| -6 | 3  | 14  | 17.7935 | 3.09249 | 10 |
| 5  | 3  | -14 | 1.44467 | 3.04335 | 10 |
| -5 | 3  | 14  | 5.52031 | 3.17812 | 10 |
| -4 | 3  | 14  | 3.28843 | 3.31906 | 10 |
| 4  | 3  | -14 | 1.36277 | 2.77669 | 10 |
| 3  | -3 | -14 | 1.23532 | 2.14330 | 10 |
| -3 | -3 | 14  | -0.5328 | 3.46900 | 13 |
| 3  | 3  | -14 | -1.9246 | 2.69818 | 10 |
| 2  | -3 | -14 | 40.4955 | 5.17357 | 10 |
| -2 | -3 | 14  | 29.7951 | 5.55273 | 13 |
| 2  | 3  | -14 | 28.2161 | 4.63269 | 10 |
| 2  | 3  | -14 | 28.0945 | 3.79401 | 14 |
| -1 | -3 | 14  | 61.5718 | 7.22164 | 13 |
| 1  | -3 | -14 | 74.9345 | 6.09100 | 10 |
| -1 | 3  | 14  | 73.5913 | 6.88832 | 13 |
| 1  | 3  | -14 | 51.1624 | 5.96582 | 10 |
| 1  | 3  | -14 | 51.2470 | 6.31103 | 14 |
| 0  | -3 | 14  | 22.9709 | 4.15874 | 13 |
| 0  | 3  | -14 | 25.0897 | 3.63414 | 10 |
| 0  | 3  | -14 | 26.8938 | 3.78928 | 12 |
| 0  | 3  | -14 | 23.0147 | 3.45432 | 14 |
| -1 | -3 | -14 | 6.21932 | 1.80948 | 8  |
| -1 | -3 | -14 | 5.58915 | 2.55376 | 10 |
| 1  | -3 | 14  | 11.9522 | 3.56842 | 13 |

|    |    |     |         |         |    |
|----|----|-----|---------|---------|----|
| -1 | 3  | -14 | 14.9227 | 2.64904 | 12 |
| -1 | 3  | -14 | 11.0906 | 2.02260 | 11 |
| -1 | 3  | -14 | 10.2085 | 2.51086 | 10 |
| -1 | 3  | -14 | 10.9949 | 2.90297 | 14 |
| -2 | -3 | -14 | 5.70411 | 1.93315 | 8  |
| -2 | -3 | -14 | 6.77116 | 1.72029 | 12 |
| -2 | -3 | -14 | 6.09545 | 1.75551 | 10 |
| 2  | -3 | 14  | 3.34824 | 2.66531 | 13 |
| -2 | 3  | -14 | 5.54445 | 2.29166 | 14 |
| 2  | 3  | 14  | 6.51392 | 2.84724 | 13 |
| -2 | 3  | -14 | 3.54604 | 2.19157 | 12 |
| -2 | 3  | -14 | 4.59103 | 0.97226 | 11 |
| -2 | 3  | -14 | 5.00242 | 0.99877 | 11 |
| -3 | -3 | -14 | 4.05169 | 1.70813 | 12 |
| 3  | -3 | 14  | 3.49420 | 2.13284 | 13 |
| -3 | 3  | -14 | 1.95679 | 1.76801 | 14 |
| 3  | 3  | 14  | 3.01716 | 2.16159 | 13 |
| -3 | 3  | -14 | 3.92268 | 1.79412 | 12 |
| -7 | -4 | 14  | 1.04434 | 1.57756 | 10 |
| -7 | 4  | 14  | 0.36526 | 1.97896 | 10 |
| -6 | -4 | 14  | 6.29296 | 2.37504 | 10 |
| -6 | 4  | 14  | 1.49560 | 1.99024 | 10 |
| 6  | 4  | -14 | 3.85088 | 2.22783 | 10 |
| -5 | 4  | 14  | 7.53318 | 3.33304 | 10 |
| 5  | 4  | -14 | 12.0597 | 2.97005 | 10 |
| -4 | 4  | 14  | 2.68427 | 3.27062 | 10 |
| 4  | 4  | -14 | 11.5474 | 3.29274 | 10 |
| 3  | -4 | -14 | 60.8208 | 6.74011 | 10 |
| 2  | -4 | -14 | 7.13723 | 3.12170 | 10 |
| -2 | -4 | 14  | 5.71962 | 3.42987 | 13 |
| 2  | 4  | -14 | 4.68459 | 2.83798 | 10 |
| 2  | 4  | -14 | 6.48190 | 2.67728 | 14 |
| -1 | -4 | 14  | 33.6158 | 6.38107 | 13 |
| 1  | 4  | -14 | 38.8902 | 4.85162 | 10 |
| 1  | 4  | -14 | 47.6449 | 5.43126 | 14 |
| 0  | -4 | 14  | 195.638 | 13.7146 | 13 |
| 0  | -4 | -14 | 149.397 | 12.5742 | 10 |
| 0  | 4  | 14  | 154.135 | 12.7161 | 13 |
| 0  | 4  | -14 | 197.204 | 12.3436 | 10 |
| 0  | 4  | -14 | 197.979 | 12.2905 | 12 |
| 0  | 4  | -14 | 184.026 | 12.2490 | 14 |
| 1  | -4 | 14  | 6.28413 | 3.16031 | 13 |
| -1 | 4  | -14 | 5.27341 | 2.45220 | 14 |
| -1 | 4  | -14 | 4.54592 | 1.56960 | 11 |
| -1 | 4  | -14 | 4.73889 | 1.77755 | 12 |
| 1  | 4  | 14  | 11.9563 | 3.22883 | 13 |
| -2 | -4 | -14 | 15.0897 | 2.44278 | 8  |
| 2  | -4 | 14  | 15.6486 | 3.11864 | 13 |
| -2 | -4 | -14 | 14.3355 | 2.62287 | 10 |
| -2 | -4 | -14 | 21.3349 | 3.26243 | 12 |

|    |    |     |         |         |    |
|----|----|-----|---------|---------|----|
| -2 | 4  | -14 | 25.1326 | 3.89862 | 14 |
| 2  | 4  | 14  | 15.4270 | 3.13128 | 13 |
| -2 | 4  | -14 | 19.1931 | 2.79504 | 12 |
| 3  | -4 | 14  | 1.55160 | 2.40278 | 13 |
| -3 | -4 | -14 | 1.50535 | 1.55133 | 12 |
| 3  | 4  | 14  | 0.30427 | 1.99515 | 13 |
| -3 | 4  | -14 | 4.96268 | 1.76934 | 14 |
| -3 | 4  | -14 | 4.13705 | 1.74925 | 12 |
| -7 | -5 | 14  | 5.56733 | 1.90059 | 10 |
| -7 | 5  | 14  | 3.77688 | 1.98277 | 10 |
| -6 | 5  | 14  | 8.56238 | 2.89195 | 10 |
| 6  | 5  | -14 | 10.9260 | 2.51019 | 10 |
| -5 | 5  | 14  | 39.0501 | 5.41921 | 10 |
| 4  | 5  | -14 | 24.9026 | 3.82556 | 10 |
| -4 | 5  | 14  | 21.2721 | 4.19427 | 10 |
| -2 | -5 | 14  | 7.46435 | 4.04267 | 13 |
| 2  | -5 | -14 | 0.44074 | 2.84883 | 10 |
| 2  | 5  | -14 | 4.71294 | 2.27239 | 10 |
| 2  | 5  | -14 | 10.5060 | 3.11791 | 14 |
| 1  | -5 | -14 | 77.3341 | 6.13704 | 10 |
| -1 | -5 | 14  | 49.6150 | 7.07155 | 13 |
| 1  | 5  | -14 | 61.4817 | 5.83052 | 10 |
| 1  | 5  | -14 | 58.6890 | 6.04239 | 14 |
| 0  | -5 | 14  | 91.1147 | 8.20538 | 13 |
| 0  | -5 | -14 | 79.2428 | 6.88302 | 10 |
| 0  | 5  | -14 | 85.3630 | 6.68385 | 10 |
| 0  | 5  | 14  | 76.5917 | 8.54469 | 13 |
| 0  | 5  | -14 | 89.3134 | 7.02354 | 14 |
| -1 | -5 | -14 | 2.17800 | 1.69761 | 10 |
| 1  | -5 | 14  | 1.89431 | 2.76078 | 13 |
| -1 | -5 | -14 | 2.75256 | 2.09324 | 8  |
| -1 | 5  | -14 | 5.78201 | 1.54795 | 11 |
| -1 | 5  | -14 | 2.23905 | 2.28686 | 14 |
| -1 | 5  | -14 | 7.73118 | 2.22700 | 12 |
| 1  | 5  | 14  | 2.13118 | 2.71550 | 13 |
| -2 | -5 | -14 | 25.2427 | 3.06119 | 10 |
| -2 | -5 | -14 | 24.5592 | 3.25235 | 8  |
| 2  | -5 | 14  | 25.9956 | 4.48897 | 13 |
| 2  | 5  | 14  | 23.5094 | 3.83674 | 13 |
| -2 | 5  | -14 | 21.2294 | 2.96151 | 12 |
| -2 | 5  | -14 | 20.4622 | 3.08274 | 14 |
| -3 | -5 | -14 | 4.90126 | 1.64811 | 12 |
| 3  | -5 | 14  | 8.18676 | 2.17017 | 13 |
| -3 | 5  | -14 | 9.74075 | 1.93640 | 12 |
| -3 | 5  | -14 | 8.95277 | 1.92326 | 14 |
| 3  | 5  | 14  | 3.97026 | 2.07505 | 13 |
| -7 | 6  | 14  | 9.78731 | 2.15554 | 10 |
| 6  | 6  | -14 | 12.0785 | 3.07163 | 10 |
| -6 | 6  | 14  | 15.8943 | 2.90375 | 10 |
| 5  | 6  | -14 | 89.3764 | 8.05297 | 10 |

|    |    |     |         |         |    |
|----|----|-----|---------|---------|----|
| -5 | 6  | 14  | 120.978 | 8.62371 | 10 |
| -4 | 6  | 14  | 4.23419 | 3.12850 | 10 |
| 4  | 6  | -14 | 2.85748 | 2.78995 | 10 |
| -3 | -6 | 14  | 62.7458 | 6.62149 | 13 |
| -3 | 6  | 14  | 65.9711 | 7.25675 | 10 |
| 3  | 6  | -14 | 57.9047 | 5.64634 | 10 |
| 2  | -6 | -14 | 18.6762 | 3.63795 | 10 |
| -2 | -6 | 14  | 21.0725 | 3.95487 | 13 |
| 2  | 6  | -14 | 20.1957 | 3.15694 | 14 |
| 2  | 6  | -14 | 16.6634 | 3.24087 | 10 |
| 1  | -6 | -14 | 16.5967 | 3.41308 | 10 |
| -1 | -6 | 14  | 23.4436 | 4.41748 | 13 |
| 1  | 6  | -14 | 23.8253 | 3.54883 | 10 |
| 1  | 6  | -14 | 23.4554 | 3.33138 | 14 |
| 0  | 6  | -14 | 6.14147 | 2.54420 | 14 |
| 0  | 6  | -14 | 5.79109 | 2.18737 | 10 |
| 1  | -6 | 14  | 2.63913 | 2.76907 | 13 |
| -1 | -6 | -14 | 6.04452 | 2.54037 | 10 |
| -1 | 6  | -14 | 5.69314 | 2.09043 | 12 |
| -1 | 6  | -14 | 5.45380 | 1.84724 | 14 |
| 1  | 6  | 14  | 4.91262 | 3.06827 | 13 |
| -1 | 6  | -14 | 5.08831 | 1.18785 | 11 |
| -1 | 6  | -14 | 6.64772 | 1.33567 | 11 |
| -2 | -6 | -14 | -0.8503 | 1.59539 | 10 |
| 2  | -6 | 14  | -0.4974 | 2.79721 | 13 |
| -2 | 6  | -14 | 2.74321 | 2.13130 | 14 |
| -2 | 6  | -14 | 0.72924 | 1.82891 | 12 |
| 2  | 6  | 14  | -0.7210 | 2.23973 | 13 |
| 3  | -6 | 14  | 9.04643 | 2.24673 | 13 |
| -3 | -6 | -14 | 12.3150 | 1.94480 | 12 |
| -3 | 6  | -14 | 13.5751 | 2.25896 | 14 |
| -3 | 6  | -14 | 12.4765 | 2.05037 | 12 |
| -7 | 7  | 14  | 2.24717 | 3.05189 | 10 |
| 6  | 7  | -14 | 3.58453 | 1.91473 | 10 |
| -6 | 7  | 14  | 6.31327 | 1.96738 | 10 |
| 5  | 7  | -14 | 19.3306 | 3.57357 | 10 |
| -4 | 7  | 14  | 0.18786 | 3.29679 | 10 |
| 4  | 7  | -14 | 1.43527 | 2.23275 | 10 |
| -3 | -7 | 14  | 10.1019 | 3.15828 | 13 |
| 3  | 7  | -14 | 10.4685 | 3.00630 | 10 |
| -2 | -7 | 14  | 58.1466 | 6.66524 | 13 |
| 2  | -7 | -14 | 60.8888 | 6.28609 | 10 |
| 2  | 7  | -14 | 58.7427 | 5.72534 | 10 |
| 1  | -7 | -14 | 17.8822 | 3.33074 | 10 |
| -1 | -7 | 14  | 22.3104 | 4.28448 | 13 |
| 1  | 7  | -14 | 14.2290 | 2.93024 | 14 |
| 1  | 7  | -14 | 11.3321 | 2.56465 | 10 |
| 0  | -7 | 14  | 10.2553 | 3.76769 | 13 |
| 0  | 7  | -14 | 17.7303 | 2.76364 | 14 |
| 0  | 7  | -14 | 24.7558 | 2.63098 | 11 |

|    |    |     |         |         |    |
|----|----|-----|---------|---------|----|
| -1 | -7 | -14 | 19.9745 | 3.64314 | 10 |
| 1  | -7 | 14  | 18.7066 | 3.63395 | 13 |
| -1 | 7  | -14 | 18.3365 | 2.67749 | 14 |
| -1 | 7  | -14 | 18.7141 | 3.17772 | 12 |
| 2  | -7 | 14  | 3.67204 | 2.75319 | 13 |
| -2 | -7 | -14 | 0.38177 | 1.72343 | 10 |
| -2 | 7  | -14 | 2.06902 | 2.02600 | 14 |
| -2 | 7  | -14 | 2.96411 | 1.72286 | 12 |
| 6  | 8  | -14 | 4.53083 | 1.88362 | 10 |
| -6 | 8  | 14  | 4.38922 | 2.20701 | 10 |
| 5  | 8  | -14 | -0.5287 | 2.63597 | 10 |
| -5 | 8  | 14  | 4.87597 | 2.72325 | 10 |
| -4 | -8 | 14  | 18.5314 | 5.24273 | 13 |
| 4  | 8  | -14 | 17.2057 | 3.20591 | 10 |
| -4 | 8  | 14  | 15.8879 | 3.88148 | 10 |
| -3 | -8 | 14  | 2.96853 | 2.86337 | 13 |
| -3 | 8  | 14  | 1.64399 | 2.36052 | 10 |
| 3  | 8  | -14 | 7.18426 | 2.12221 | 10 |
| 2  | -8 | -14 | 4.87983 | 2.97161 | 10 |
| -2 | -8 | 14  | 1.77216 | 3.03182 | 13 |
| 2  | 8  | -14 | 1.07506 | 2.23749 | 10 |
| -2 | 8  | 14  | 5.25979 | 2.68750 | 10 |
| -1 | -8 | 14  | -2.0374 | 3.38404 | 13 |
| 1  | -8 | -14 | 2.57955 | 2.96410 | 10 |
| 1  | 8  | -14 | -4.3749 | 2.55656 | 14 |
| 1  | 8  | -14 | -2.1374 | 2.20607 | 10 |
| 0  | -8 | 14  | 50.6624 | 6.21602 | 13 |
| 0  | 8  | -14 | 52.9152 | 4.31861 | 11 |
| 0  | 8  | -14 | 56.0136 | 5.61222 | 14 |
| -1 | -8 | -14 | 3.62562 | 2.37487 | 10 |
| 1  | -8 | 14  | 4.87570 | 2.76584 | 13 |
| -1 | 8  | -14 | 4.14995 | 1.74330 | 14 |
| -2 | -8 | -14 | 9.61562 | 1.84377 | 10 |
| 2  | -8 | 14  | 10.9234 | 2.56300 | 13 |
| -2 | 8  | -14 | 13.1606 | 2.15319 | 12 |
| -2 | 8  | -14 | 14.1543 | 2.43172 | 14 |
| -6 | 9  | 14  | 11.6276 | 2.39549 | 10 |
| 6  | 9  | -14 | 8.66836 | 2.63306 | 10 |
| -5 | 9  | 14  | 6.64486 | 2.66774 | 10 |
| -4 | -9 | 14  | 2.42461 | 2.74986 | 13 |
| 4  | 9  | -14 | 4.47528 | 2.55026 | 10 |
| -4 | 9  | 14  | 6.16633 | 2.49279 | 10 |
| -3 | -9 | 14  | 45.6323 | 5.47364 | 13 |
| -3 | 9  | 14  | 24.8929 | 4.88766 | 10 |
| 3  | 9  | -14 | 35.8504 | 4.54561 | 10 |
| 2  | 9  | -14 | 31.1355 | 4.00533 | 10 |
| -2 | 9  | 14  | 34.7658 | 5.80286 | 10 |
| 1  | -9 | -14 | 3.38064 | 2.03453 | 10 |
| -1 | -9 | 14  | 3.33680 | 2.94504 | 13 |
| 1  | 9  | -14 | -0.5357 | 1.69271 | 11 |

|    |     |     |         |         |    |
|----|-----|-----|---------|---------|----|
| 1  | 9   | -14 | 3.70865 | 2.56869 | 14 |
| 0  | -9  | 14  | 11.0236 | 3.17940 | 13 |
| 0  | -9  | -14 | 6.91051 | 2.70589 | 10 |
| 0  | 9   | -14 | 6.59724 | 2.54604 | 14 |
| -1 | -9  | -14 | 1.62672 | 1.63346 | 10 |
| 1  | -9  | 14  | 1.89773 | 2.44811 | 13 |
| -1 | 9   | -14 | -0.0004 | 2.09992 | 14 |
| -2 | -9  | -14 | 1.81678 | 1.76061 | 10 |
| 2  | -9  | 14  | 1.15871 | 1.93148 | 13 |
| -2 | 9   | -14 | 0.95304 | 1.44424 | 12 |
| -2 | 9   | -14 | 1.27454 | 1.78912 | 14 |
| 6  | 10  | -14 | 5.49785 | 1.79559 | 10 |
| -6 | 10  | 14  | 1.74899 | 1.64526 | 10 |
| -5 | 10  | 14  | 24.0848 | 3.28250 | 10 |
| 5  | 10  | -14 | 29.0992 | 4.13158 | 10 |
| -4 | -10 | 14  | 5.25855 | 2.33185 | 13 |
| -4 | 10  | 14  | 4.55671 | 3.10650 | 10 |
| 4  | 10  | -14 | 4.22725 | 2.44654 | 10 |
| -3 | -10 | 14  | 83.2083 | 7.68088 | 13 |
| 3  | 10  | -14 | 70.9341 | 6.40568 | 10 |
| -3 | 10  | 14  | 82.1298 | 7.73931 | 10 |
| -2 | -10 | 14  | 45.4007 | 5.71643 | 13 |
| 2  | 10  | -14 | 45.0230 | 4.30550 | 10 |
| -1 | -10 | 14  | 13.7484 | 3.27052 | 13 |
| 1  | -10 | -14 | 5.74762 | 2.84552 | 10 |
| 1  | 10  | -14 | 11.3685 | 2.77762 | 14 |
| 1  | 10  | -14 | 13.1802 | 2.11681 | 11 |
| 0  | -10 | 14  | 70.5341 | 7.11291 | 13 |
| 0  | -10 | -14 | 83.3314 | 6.91349 | 10 |
| 0  | 10  | -14 | 81.7850 | 6.82315 | 14 |
| 1  | -10 | 14  | 8.56574 | 2.57272 | 13 |
| -1 | -10 | -14 | 3.91606 | 1.72708 | 10 |
| -1 | 10  | -14 | 4.99789 | 2.19862 | 14 |
| -2 | -10 | -14 | 3.97664 | 1.46040 | 10 |
| 2  | -10 | 14  | 7.12308 | 2.05553 | 13 |
| -2 | 10  | -14 | 9.99670 | 2.08997 | 14 |
| 6  | 11  | -14 | 0.43831 | 2.22579 | 10 |
| 5  | 11  | -14 | 13.2393 | 2.36850 | 10 |
| -4 | -11 | 14  | 1.95414 | 2.02523 | 13 |
| 4  | 11  | -14 | 2.47973 | 2.20509 | 10 |
| -4 | 11  | 14  | 1.90419 | 2.58656 | 10 |
| -3 | -11 | 14  | 1.12063 | 2.50389 | 13 |
| 3  | 11  | -14 | 2.06124 | 2.02807 | 10 |
| -3 | 11  | 14  | 8.76122 | 3.44662 | 10 |
| -2 | -11 | 14  | 18.6654 | 3.42731 | 13 |
| 2  | 11  | -14 | 15.6821 | 2.93830 | 10 |
| -2 | 11  | 14  | 26.6502 | 5.03369 | 10 |
| 1  | -11 | -14 | 44.6126 | 4.58504 | 10 |
| -1 | -11 | 14  | 44.3166 | 5.41979 | 13 |
| 1  | 11  | -14 | 40.3820 | 3.70836 | 11 |

|    |     |     |         |         |    |
|----|-----|-----|---------|---------|----|
| -1 | 11  | 14  | 46.4931 | 5.18499 | 10 |
| 1  | 11  | -14 | 40.2993 | 5.39093 | 14 |
| 0  | -11 | 14  | 31.0244 | 4.79263 | 13 |
| 0  | -11 | -14 | 41.0343 | 4.52718 | 10 |
| 0  | 11  | -14 | 33.5514 | 4.36504 | 14 |
| 1  | -11 | 14  | 24.7298 | 3.88384 | 13 |
| -1 | -11 | -14 | 29.6683 | 3.14141 | 10 |
| -1 | 11  | -14 | 19.4778 | 2.91656 | 14 |
| 5  | 12  | -14 | 12.1505 | 2.18631 | 10 |
| -5 | 12  | 14  | 13.9595 | 2.69221 | 10 |
| -4 | -12 | 14  | 9.74453 | 2.24962 | 13 |
| 4  | 12  | -14 | 8.75814 | 2.37282 | 10 |
| -4 | 12  | 14  | 6.13925 | 2.62350 | 10 |
| -3 | -12 | 14  | 5.46068 | 2.37903 | 13 |
| 3  | 12  | -14 | 4.57527 | 2.25517 | 10 |
| -2 | -12 | 14  | 12.2949 | 3.02296 | 13 |
| 2  | 12  | -14 | 14.7609 | 1.94773 | 11 |
| -2 | 12  | 14  | 7.70556 | 3.38808 | 10 |
| -1 | -12 | 14  | 9.46846 | 2.65743 | 13 |
| 1  | 12  | -14 | 7.98821 | 1.12999 | 11 |
| -1 | 12  | 14  | 10.1963 | 2.73931 | 10 |
| 1  | 12  | -14 | 7.57407 | 1.10531 | 11 |
| 1  | 12  | -14 | 9.98995 | 2.30581 | 14 |
| 0  | -12 | -14 | 4.30030 | 2.33734 | 10 |
| 0  | -12 | 14  | 5.44306 | 2.24986 | 13 |
| 0  | 12  | -14 | 4.12044 | 2.06337 | 14 |
| 1  | -12 | 14  | 4.99377 | 2.29329 | 13 |
| -1 | -12 | -14 | 4.52308 | 2.04201 | 10 |
| -1 | 12  | -14 | 7.23048 | 2.09977 | 14 |
| -5 | 13  | 14  | -0.4967 | 2.34847 | 10 |
| 5  | 13  | -14 | -0.1918 | 1.74180 | 10 |
| -4 | -13 | 14  | 8.02448 | 1.99674 | 13 |
| 4  | 13  | -14 | 7.47492 | 2.26500 | 10 |
| -4 | 13  | 14  | 10.6402 | 2.56693 | 10 |
| -3 | -13 | 14  | 5.46943 | 2.64512 | 13 |
| 3  | 13  | -14 | 4.02434 | 1.77359 | 10 |
| -2 | -13 | 14  | 14.0077 | 2.78976 | 13 |
| -2 | 13  | 14  | 9.47992 | 2.63647 | 10 |
| 2  | 13  | -14 | 10.4791 | 1.50824 | 11 |
| -1 | -13 | 14  | 0.78133 | 2.14414 | 13 |
| 1  | 13  | -14 | 0.94648 | 2.27438 | 14 |
| -1 | 13  | 14  | 1.24849 | 2.77272 | 10 |
| 0  | -13 | 14  | 9.17037 | 2.35099 | 13 |
| 0  | 13  | -14 | 9.28319 | 2.24097 | 14 |
| -1 | 13  | -14 | 10.2626 | 2.08897 | 14 |
| -4 | -14 | 14  | 20.9735 | 3.32658 | 13 |
| -4 | 14  | 14  | 15.7156 | 2.94002 | 10 |
| -3 | -14 | 14  | 20.7271 | 3.43152 | 13 |
| -3 | 14  | 14  | 15.5653 | 2.92676 | 10 |
| 3  | 14  | -14 | 19.2533 | 2.50029 | 11 |



|    |     |     |         |         |    |
|----|-----|-----|---------|---------|----|
| -2 | -14 | 14  | 9.70008 | 2.29428 | 13 |
| -2 | 14  | 14  | 6.77161 | 2.23050 | 10 |
| 2  | 14  | -14 | 5.23569 | 0.94127 | 11 |
| 2  | 14  | -14 | 4.90017 | 0.88763 | 11 |
| -1 | -14 | 14  | 6.34757 | 2.22699 | 13 |
| -1 | 14  | 14  | 3.13171 | 2.59641 | 10 |
| 1  | 14  | -14 | 6.23875 | 1.84927 | 14 |
| 0  | -14 | 14  | 5.42896 | 1.94729 | 13 |
| 0  | 14  | -14 | 6.20995 | 1.88846 | 14 |
| -3 | -15 | 14  | 34.9779 | 3.77122 | 13 |
| -3 | 15  | 14  | 30.4404 | 3.93438 | 10 |
| 3  | 15  | -14 | 32.8935 | 2.71547 | 11 |
| -2 | -15 | 14  | 8.25214 | 2.13355 | 13 |
| -1 | -15 | 14  | 10.9431 | 2.17881 | 13 |
| -1 | 15  | 14  | 2.44418 | 2.73701 | 10 |
| -6 | 0   | 15  | -0.1436 | 1.61340 | 10 |
| -5 | 0   | 15  | 11.7136 | 3.25333 | 10 |
| 5  | 0   | -15 | 13.5012 | 3.25708 | 10 |
| 4  | 0   | -15 | -0.6137 | 2.63221 | 10 |
| 3  | 0   | -15 | 7.42979 | 3.19772 | 10 |
| 2  | 0   | -15 | 9.43026 | 2.59789 | 10 |
| -1 | 0   | 15  | -1.6054 | 2.71458 | 13 |
| 1  | 0   | -15 | 1.15910 | 1.70402 | 10 |
| 0  | 0   | 15  | 2.54271 | 2.87499 | 13 |
| 0  | 0   | -15 | 6.18559 | 2.19285 | 10 |
| 0  | 0   | -15 | 2.79324 | 2.32831 | 14 |
| 0  | 0   | -15 | 3.22533 | 2.04163 | 12 |
| 1  | 0   | 15  | 12.4878 | 3.33477 | 13 |
| -1 | 0   | -15 | 12.7281 | 2.34623 | 12 |
| -1 | 0   | -15 | 11.6778 | 2.09141 | 10 |
| -2 | 0   | -15 | 19.9747 | 1.76317 | 11 |
| -2 | 0   | -15 | 20.8010 | 2.92748 | 12 |
| 2  | 0   | 15  | 22.8293 | 3.67988 | 13 |
| -2 | 0   | -15 | 21.5477 | 1.72590 | 11 |
| -6 | -1  | 15  | 28.6512 | 4.10587 | 10 |
| -6 | 1   | 15  | 23.1111 | 4.01677 | 10 |
| 5  | 1   | -15 | 7.94146 | 2.87664 | 10 |
| -5 | 1   | 15  | 1.29107 | 2.00814 | 10 |
| 4  | -1  | -15 | 0.60486 | 2.62217 | 10 |
| 4  | 1   | -15 | 5.21235 | 2.78035 | 10 |
| 3  | -1  | -15 | 27.5301 | 4.84874 | 10 |
| -2 | -1  | 15  | 50.1222 | 6.51655 | 13 |
| 2  | 1   | -15 | 40.6694 | 5.12691 | 14 |
| 2  | 1   | -15 | 44.2555 | 5.34409 | 10 |
| 1  | -1  | -15 | 19.3587 | 3.83440 | 10 |
| -1 | -1  | 15  | 15.0426 | 3.97101 | 13 |
| 1  | 1   | -15 | 11.9778 | 2.93312 | 10 |
| -1 | 1   | 15  | 21.8306 | 3.52093 | 13 |
| 1  | 1   | -15 | 12.5003 | 2.94229 | 14 |
| 0  | -1  | -15 | 24.4858 | 3.62403 | 10 |

|    |    |     |         |         |    |
|----|----|-----|---------|---------|----|
| 0  | -1 | 15  | 23.1481 | 3.84312 | 13 |
| 0  | -1 | -15 | 24.5765 | 3.40219 | 14 |
| 0  | 1  | -15 | 25.2380 | 3.38960 | 10 |
| 0  | 1  | -15 | 26.1549 | 3.49972 | 12 |
| 0  | 1  | 15  | 19.4422 | 3.59414 | 13 |
| 0  | 1  | -15 | 26.8912 | 4.22128 | 14 |
| -1 | -1 | -15 | 22.0283 | 2.85882 | 10 |
| 1  | -1 | 15  | 27.8935 | 4.43746 | 13 |
| -1 | -1 | -15 | 25.1558 | 3.41028 | 12 |
| -1 | 1  | -15 | 27.2026 | 3.75051 | 14 |
| -1 | 1  | -15 | 22.3669 | 2.81999 | 11 |
| 1  | 1  | 15  | 30.0330 | 4.37081 | 13 |
| -1 | 1  | -15 | 27.1542 | 3.35166 | 12 |
| 2  | -1 | 15  | 10.5332 | 2.40130 | 13 |
| -2 | -1 | -15 | 12.1775 | 1.65387 | 11 |
| -2 | -1 | -15 | 11.8625 | 2.09830 | 12 |
| -2 | 1  | -15 | 12.8646 | 2.15409 | 14 |
| -2 | 1  | -15 | 14.0206 | 2.16614 | 12 |
| 2  | 1  | 15  | 12.5453 | 2.50993 | 13 |
| -6 | -2 | 15  | 55.6046 | 5.28178 | 10 |
| -6 | 2  | 15  | 62.5831 | 5.78803 | 10 |
| 5  | 2  | -15 | 14.0504 | 2.71433 | 10 |
| -5 | 2  | 15  | 14.2490 | 3.34260 | 10 |
| 4  | -2 | -15 | 7.83064 | 2.33112 | 10 |
| 4  | 2  | -15 | 3.82839 | 2.78459 | 10 |
| 3  | -2 | -15 | 25.3383 | 3.74529 | 10 |
| 3  | 2  | -15 | 18.4156 | 3.39075 | 10 |
| 2  | -2 | -15 | 36.6645 | 4.29543 | 10 |
| -2 | -2 | 15  | 30.5020 | 5.22199 | 13 |
| 2  | 2  | -15 | 36.8111 | 4.68346 | 14 |
| -1 | -2 | 15  | 19.6957 | 3.87540 | 13 |
| 1  | 2  | -15 | 26.4334 | 3.88338 | 10 |
| 1  | 2  | -15 | 29.6975 | 4.33843 | 14 |
| 0  | -2 | -15 | 12.3871 | 2.75435 | 10 |
| 0  | -2 | 15  | 7.40892 | 3.21594 | 13 |
| 0  | 2  | -15 | 11.5930 | 2.24974 | 12 |
| 0  | 2  | -15 | 10.3187 | 2.54671 | 10 |
| 0  | 2  | 15  | 7.83001 | 2.91781 | 13 |
| 0  | 2  | -15 | 11.4241 | 2.66084 | 14 |
| 1  | -2 | 15  | 7.66148 | 2.81767 | 13 |
| -1 | -2 | -15 | 3.98069 | 1.53157 | 12 |
| -1 | -2 | -15 | 4.33060 | 1.77549 | 10 |
| -1 | -2 | -15 | 4.66671 | 2.22446 | 14 |
| -1 | 2  | -15 | 9.81835 | 2.09950 | 12 |
| 1  | 2  | 15  | 3.08600 | 2.43101 | 13 |
| -2 | -2 | -15 | 7.99179 | 1.28805 | 11 |
| -2 | -2 | -15 | 7.75659 | 1.88607 | 12 |
| 2  | -2 | 15  | 6.68962 | 2.23415 | 13 |
| -2 | 2  | -15 | 5.95646 | 1.79632 | 12 |
| 2  | 2  | 15  | 7.76011 | 2.24060 | 13 |

|    |    |     |         |         |    |
|----|----|-----|---------|---------|----|
| -2 | 2  | -15 | 9.20389 | 1.99360 | 14 |
| -6 | -3 | 15  | 14.0267 | 2.80948 | 10 |
| 6  | 3  | -15 | 13.5157 | 2.88345 | 10 |
| -6 | 3  | 15  | 20.3515 | 3.60523 | 10 |
| 5  | 3  | -15 | 24.0374 | 3.51450 | 10 |
| -5 | 3  | 15  | 25.7540 | 4.34228 | 10 |
| 4  | -3 | -15 | 1.45151 | 1.98961 | 10 |
| -4 | 3  | 15  | 1.19763 | 2.02986 | 10 |
| 4  | 3  | -15 | 4.23088 | 2.75849 | 10 |
| 3  | -3 | -15 | 27.6115 | 4.72437 | 10 |
| 3  | 3  | -15 | 27.3029 | 4.44243 | 10 |
| 2  | -3 | -15 | 9.19892 | 3.09146 | 10 |
| -2 | -3 | 15  | 4.76213 | 3.52738 | 13 |
| 2  | 3  | -15 | 6.14438 | 2.43927 | 14 |
| 2  | 3  | -15 | 4.05186 | 2.65442 | 10 |
| -1 | -3 | 15  | 4.28650 | 3.13506 | 13 |
| 1  | -3 | -15 | 1.85421 | 1.77992 | 10 |
| 1  | 3  | -15 | 5.50512 | 2.33347 | 10 |
| 1  | 3  | -15 | 4.11261 | 2.34760 | 14 |
| 0  | -3 | 15  | 12.3415 | 3.43774 | 13 |
| 0  | -3 | -15 | 15.4534 | 2.96234 | 10 |
| 0  | 3  | -15 | 14.0894 | 2.69698 | 14 |
| 0  | 3  | 15  | 12.0476 | 3.48003 | 13 |
| 0  | 3  | -15 | 14.8005 | 2.45488 | 12 |
| 0  | 3  | -15 | 13.2804 | 2.53148 | 10 |
| -1 | -3 | -15 | 7.45507 | 1.71664 | 8  |
| -1 | -3 | -15 | 10.1795 | 2.10656 | 10 |
| -1 | -3 | -15 | 10.0075 | 2.11161 | 12 |
| 1  | -3 | 15  | 10.6766 | 2.93495 | 13 |
| -1 | 3  | -15 | 11.3870 | 2.15842 | 12 |
| -1 | 3  | -15 | 11.3012 | 1.49826 | 11 |
| 1  | 3  | 15  | 7.61730 | 2.93995 | 13 |
| -1 | 3  | -15 | 9.63673 | 2.28305 | 14 |
| 2  | -3 | 15  | 1.52179 | 1.99174 | 13 |
| -2 | -3 | -15 | 0.41486 | 1.47498 | 12 |
| -2 | 3  | -15 | 1.19993 | 1.71365 | 14 |
| 2  | 3  | 15  | 0.05353 | 1.93013 | 13 |
| -2 | 3  | -15 | 0.07098 | 1.52633 | 12 |
| -6 | 4  | 15  | 5.12950 | 2.39828 | 10 |
| 6  | 4  | -15 | 10.4782 | 2.63043 | 10 |
| -5 | 4  | 15  | 0.44057 | 2.48102 | 10 |
| 5  | 4  | -15 | -0.3046 | 2.38931 | 10 |
| 4  | 4  | -15 | 1.59038 | 1.85960 | 10 |
| -4 | 4  | 15  | 0.54677 | 2.75094 | 10 |
| 3  | -4 | -15 | 0.64401 | 1.98383 | 10 |
| 3  | 4  | -15 | 10.2161 | 2.33544 | 10 |
| -2 | -4 | 15  | -1.5278 | 3.33615 | 13 |
| 2  | 4  | -15 | 1.31058 | 2.16957 | 14 |
| 2  | 4  | -15 | 1.93674 | 2.31585 | 10 |
| 1  | -4 | -15 | 1.80973 | 2.50927 | 10 |

|    |    |     |         |         |    |
|----|----|-----|---------|---------|----|
| -1 | -4 | 15  | 3.96500 | 3.70341 | 13 |
| 1  | 4  | -15 | 3.12777 | 2.27525 | 14 |
| 1  | 4  | -15 | 4.46413 | 2.07881 | 10 |
| 0  | -4 | 15  | 19.5313 | 3.84296 | 13 |
| 0  | 4  | -15 | 24.6179 | 3.83543 | 14 |
| 0  | 4  | -15 | 25.0446 | 3.14288 | 11 |
| 0  | 4  | -15 | 20.7441 | 2.90559 | 10 |
| 1  | -4 | 15  | 11.6385 | 2.88621 | 13 |
| -1 | -4 | -15 | 9.25536 | 2.09413 | 10 |
| 1  | 4  | 15  | 7.44379 | 2.75409 | 13 |
| -1 | 4  | -15 | 11.4029 | 2.40463 | 12 |
| -1 | 4  | -15 | 11.3411 | 2.39170 | 14 |
| -1 | 4  | -15 | 10.3147 | 1.29571 | 11 |
| -1 | 4  | -15 | 10.4641 | 1.21289 | 11 |
| -2 | -4 | -15 | 2.51734 | 1.55763 | 12 |
| 2  | -4 | 15  | 4.55747 | 2.08951 | 13 |
| -2 | 4  | -15 | 4.90654 | 1.70065 | 12 |
| -2 | 4  | -15 | 7.63039 | 1.85518 | 14 |
| 6  | 5  | -15 | 19.4378 | 3.47683 | 10 |
| 5  | 5  | -15 | 4.42064 | 1.95645 | 10 |
| -5 | 5  | 15  | 0.61635 | 2.49576 | 10 |
| 4  | 5  | -15 | 17.8614 | 3.43930 | 10 |
| 3  | -5 | -15 | 54.1055 | 5.42297 | 10 |
| -3 | -5 | 15  | 56.3962 | 5.83856 | 13 |
| 3  | 5  | -15 | 59.1069 | 5.30695 | 10 |
| -2 | -5 | 15  | 28.5521 | 4.97114 | 13 |
| 2  | 5  | -15 | 30.1414 | 4.02848 | 10 |
| 2  | 5  | -15 | 23.6883 | 4.04437 | 14 |
| -1 | -5 | 15  | 0.94152 | 3.08959 | 13 |
| 1  | -5 | -15 | 4.73229 | 1.96006 | 10 |
| 1  | 5  | -15 | 0.75620 | 1.79567 | 10 |
| 1  | 5  | -15 | 4.97640 | 2.26947 | 14 |
| 0  | -5 | -15 | 6.72421 | 1.87431 | 10 |
| 0  | -5 | 15  | 1.76948 | 2.84122 | 13 |
| 0  | 5  | -15 | 2.66263 | 2.14869 | 14 |
| 0  | 5  | -15 | 3.35044 | 1.71351 | 11 |
| -1 | -5 | -15 | 14.4937 | 2.64149 | 10 |
| 1  | -5 | 15  | 11.7761 | 2.86172 | 13 |
| -1 | 5  | -15 | 12.9792 | 2.42032 | 14 |
| -1 | 5  | -15 | 13.8257 | 2.40664 | 12 |
| 2  | -5 | 15  | 6.26209 | 2.05995 | 13 |
| -2 | 5  | -15 | 6.46965 | 1.94812 | 14 |
| 6  | 6  | -15 | 34.7938 | 3.52508 | 10 |
| -6 | 6  | 15  | 29.1689 | 3.35292 | 10 |
| -5 | 6  | 15  | 15.7461 | 2.93324 | 10 |
| 5  | 6  | -15 | 12.9507 | 2.91262 | 10 |
| 4  | 6  | -15 | 5.44149 | 2.69426 | 10 |
| -4 | 6  | 15  | 11.3782 | 2.66606 | 10 |
| -3 | -6 | 15  | 24.8787 | 3.97089 | 13 |
| 3  | -6 | -15 | 33.8760 | 4.74717 | 10 |

|    |    |     |         |         |    |
|----|----|-----|---------|---------|----|
| 3  | 6  | -15 | 22.5680 | 4.10252 | 10 |
| -3 | 6  | 15  | 35.1579 | 5.24441 | 10 |
| -2 | -6 | 15  | 26.9835 | 4.77197 | 13 |
| 2  | -6 | -15 | 31.5167 | 3.85957 | 10 |
| 2  | 6  | -15 | 29.7209 | 4.59866 | 14 |
| 2  | 6  | -15 | 29.2411 | 3.87763 | 10 |
| -1 | -6 | 15  | 8.53254 | 3.11646 | 13 |
| 1  | 6  | -15 | 8.68592 | 2.45292 | 10 |
| 1  | 6  | -15 | 16.9462 | 2.80388 | 14 |
| 0  | -6 | 15  | 12.2063 | 3.16795 | 13 |
| 0  | -6 | -15 | 19.0549 | 3.28537 | 10 |
| 0  | 6  | -15 | 11.6944 | 1.59550 | 11 |
| 0  | 6  | -15 | 11.5227 | 2.52927 | 14 |
| -1 | -6 | -15 | 7.91036 | 2.02310 | 10 |
| 1  | -6 | 15  | 8.53108 | 2.53673 | 13 |
| -1 | 6  | -15 | 7.17695 | 2.12730 | 14 |
| -1 | 6  | -15 | 8.76162 | 1.81722 | 12 |
| -6 | 7  | 15  | 3.73843 | 1.93620 | 10 |
| -5 | 7  | 15  | 21.6750 | 3.75151 | 10 |
| 5  | 7  | -15 | 23.1183 | 3.70891 | 10 |
| -4 | 7  | 15  | 3.60664 | 2.84838 | 10 |
| 4  | 7  | -15 | 10.2504 | 2.66478 | 10 |
| -3 | -7 | 15  | 4.73575 | 2.55010 | 13 |
| -3 | 7  | 15  | 10.0879 | 3.42413 | 10 |
| 3  | 7  | -15 | 5.53773 | 2.55695 | 10 |
| 2  | -7 | -15 | 26.6280 | 3.75145 | 10 |
| -2 | -7 | 15  | 34.2084 | 5.45659 | 13 |
| 2  | 7  | -15 | 23.6592 | 4.01961 | 10 |
| -1 | -7 | 15  | 1.78611 | 2.62509 | 13 |
| 1  | -7 | -15 | 1.91813 | 1.71472 | 10 |
| 1  | 7  | -15 | 4.38207 | 2.26164 | 14 |
| 1  | 7  | -15 | 1.13148 | 1.48005 | 10 |
| 1  | 7  | -15 | 1.61402 | 1.51981 | 11 |
| 0  | -7 | 15  | 0.25726 | 2.58661 | 13 |
| 0  | -7 | -15 | 4.59404 | 2.20005 | 10 |
| 0  | 7  | -15 | 2.52113 | 1.09734 | 11 |
| 0  | 7  | -15 | 1.08593 | 1.04081 | 11 |
| 0  | 7  | -15 | 1.12204 | 2.09184 | 14 |
| 1  | -7 | 15  | 3.32442 | 2.62997 | 13 |
| -1 | -7 | -15 | 3.05831 | 1.77255 | 10 |
| -1 | 7  | -15 | 4.25736 | 1.94480 | 14 |
| 5  | 8  | -15 | 6.49810 | 2.38142 | 10 |
| -5 | 8  | 15  | 9.91875 | 2.53058 | 10 |
| -4 | 8  | 15  | 15.6799 | 3.09699 | 10 |
| 4  | 8  | -15 | 9.93248 | 2.68474 | 10 |
| -3 | -8 | 15  | 4.40461 | 2.32093 | 13 |
| -3 | 8  | 15  | 3.77375 | 2.24999 | 10 |
| 3  | 8  | -15 | 3.17738 | 2.07994 | 10 |
| -2 | -8 | 15  | 9.10859 | 2.71472 | 13 |
| 2  | -8 | -15 | 5.09920 | 2.58823 | 10 |

|    |     |     |         |         |    |
|----|-----|-----|---------|---------|----|
| 2  | 8   | -15 | 5.43731 | 1.85574 | 10 |
| -1 | -8  | 15  | 14.4915 | 3.13088 | 13 |
| 1  | 8   | -15 | 16.5988 | 1.98668 | 11 |
| 1  | 8   | -15 | 17.0841 | 2.75176 | 14 |
| 0  | -8  | 15  | 2.13021 | 2.81510 | 13 |
| 0  | -8  | -15 | 1.51322 | 1.47122 | 10 |
| 0  | 8   | -15 | 1.40499 | 1.45521 | 14 |
| -1 | -8  | -15 | 9.74883 | 1.73678 | 10 |
| 1  | -8  | 15  | 6.69986 | 2.70682 | 13 |
| -1 | 8   | -15 | 8.17662 | 2.02359 | 14 |
| -5 | 9   | 15  | 6.83739 | 1.83214 | 10 |
| 4  | 9   | -15 | 14.4216 | 2.41084 | 10 |
| -3 | -9  | 15  | 44.8242 | 4.79141 | 13 |
| 3  | 9   | -15 | 43.3958 | 4.19493 | 10 |
| -3 | 9   | 15  | 40.3347 | 4.73440 | 10 |
| -2 | -9  | 15  | 17.4143 | 3.11736 | 13 |
| 2  | -9  | -15 | 13.9216 | 2.97659 | 10 |
| 2  | 9   | -15 | 17.3073 | 2.72674 | 10 |
| -2 | 9   | 15  | 16.0049 | 3.61943 | 10 |
| -1 | -9  | 15  | 7.32130 | 2.53143 | 13 |
| 1  | -9  | -15 | 3.61680 | 1.76208 | 10 |
| 1  | 9   | -15 | 8.49817 | 1.37896 | 11 |
| 1  | 9   | -15 | 7.88641 | 2.15909 | 14 |
| 0  | -9  | 15  | 5.40262 | 2.80458 | 13 |
| 0  | -9  | -15 | 4.17544 | 2.08762 | 10 |
| 0  | 9   | -15 | 4.94650 | 1.94752 | 14 |
| 1  | -9  | 15  | 29.5155 | 3.89809 | 13 |
| -1 | 9   | -15 | 33.1493 | 3.47852 | 14 |
| -5 | 10  | 15  | 4.86246 | 1.99778 | 10 |
| 5  | 10  | -15 | 3.77668 | 2.00499 | 10 |
| -4 | 10  | 15  | 7.38294 | 2.50595 | 10 |
| 4  | 10  | -15 | 4.62323 | 1.96965 | 10 |
| -3 | -10 | 15  | 27.1835 | 3.88672 | 13 |
| 3  | 10  | -15 | 29.5841 | 3.46071 | 10 |
| -3 | 10  | 15  | 29.4649 | 3.86823 | 10 |
| -2 | -10 | 15  | 7.10046 | 2.49025 | 13 |
| -2 | 10  | 15  | 5.64451 | 2.96349 | 10 |
| 2  | 10  | -15 | 9.29549 | 1.57316 | 11 |
| -1 | -10 | 15  | 8.03401 | 2.49133 | 13 |
| 1  | -10 | -15 | 9.62860 | 2.03954 | 10 |
| 1  | 10  | -15 | 8.61027 | 1.13080 | 11 |
| 1  | 10  | -15 | 9.68317 | 2.04504 | 14 |
| 1  | 10  | -15 | 8.84923 | 1.08235 | 11 |
| 0  | -10 | -15 | 6.83284 | 2.09588 | 10 |
| 0  | -10 | 15  | 5.34476 | 2.14191 | 13 |
| 0  | 10  | -15 | 7.66324 | 1.95834 | 14 |
| -4 | 11  | 15  | 5.95176 | 1.79031 | 10 |
| 4  | 11  | -15 | 4.77606 | 1.76584 | 10 |
| -3 | -11 | 15  | 11.1499 | 2.62953 | 13 |
| -3 | 11  | 15  | 10.0312 | 2.89647 | 10 |

|    |     |     |         |         |    |
|----|-----|-----|---------|---------|----|
| 3  | 11  | -15 | 10.6507 | 1.92986 | 10 |
| -2 | -11 | 15  | 8.33968 | 2.37429 | 13 |
| -2 | 11  | 15  | 12.7046 | 3.06950 | 10 |
| 2  | 11  | -15 | 8.11999 | 1.48547 | 11 |
| 1  | -11 | -15 | 2.27033 | 3.20946 | 10 |
| -1 | -11 | 15  | 2.95384 | 2.07830 | 13 |
| 1  | 11  | -15 | 3.52591 | 2.06713 | 14 |
| 0  | -11 | 15  | 12.4390 | 2.35097 | 13 |
| 0  | 11  | -15 | 17.5499 | 2.86868 | 14 |
| -3 | -12 | 15  | 32.7069 | 3.78677 | 13 |
| -3 | 12  | 15  | 35.1143 | 3.78456 | 10 |
| -2 | -12 | 15  | 10.2800 | 2.53281 | 13 |
| 2  | 12  | -15 | 5.96807 | 0.94297 | 11 |
| -2 | 12  | 15  | 9.50987 | 2.34340 | 10 |
| 2  | 12  | -15 | 7.28747 | 0.95801 | 11 |
| -1 | -12 | 15  | 9.29404 | 2.58496 | 13 |
| 5  | 0   | -16 | 1.59328 | 2.19921 | 10 |
| 4  | 0   | -16 | 6.54049 | 1.95827 | 10 |
| 3  | 0   | -16 | 5.58416 | 2.49814 | 10 |
| 2  | 0   | -16 | 1.47596 | 2.24477 | 14 |
| 2  | 0   | -16 | 1.14735 | 1.57147 | 10 |
| 1  | 0   | -16 | 18.7637 | 2.94170 | 10 |
| 1  | 0   | -16 | 16.4430 | 2.54265 | 14 |
| 0  | 0   | -16 | 63.6963 | 5.05793 | 14 |
| 0  | 0   | -16 | 59.9963 | 4.74583 | 10 |
| 0  | 0   | -16 | 58.6146 | 4.74423 | 12 |
| 0  | 0   | 16  | 62.4552 | 5.65741 | 13 |
| 5  | 1   | -16 | 0.76407 | 1.42232 | 10 |
| 4  | -1  | -16 | 6.19704 | 2.45613 | 10 |
| 4  | 1   | -16 | 7.05241 | 2.03328 | 10 |
| 3  | -1  | -16 | 3.03458 | 1.75092 | 10 |
| 3  | 1   | -16 | 6.15430 | 1.89559 | 10 |
| 2  | -1  | -16 | 6.20164 | 2.05681 | 14 |
| 2  | -1  | -16 | 5.41200 | 1.94403 | 10 |
| 2  | 1   | -16 | 5.75337 | 2.39423 | 10 |
| 2  | 1   | -16 | 12.2693 | 2.18291 | 14 |
| 1  | -1  | -16 | 5.75202 | 2.05394 | 14 |
| 1  | -1  | -16 | 7.19991 | 2.19981 | 10 |
| -1 | -1  | 16  | 9.75601 | 2.77036 | 13 |
| 1  | 1   | -16 | 7.20243 | 2.04879 | 14 |
| 1  | 1   | -16 | 5.83033 | 1.97171 | 10 |
| 0  | -1  | -16 | 30.1876 | 3.08461 | 10 |
| 0  | -1  | 16  | 27.3391 | 4.41015 | 13 |
| 0  | -1  | -16 | 39.2602 | 3.68456 | 14 |
| 0  | -1  | -16 | 35.3872 | 3.23269 | 12 |
| 0  | 1   | -16 | 25.4367 | 3.55838 | 14 |
| 0  | 1   | 16  | 35.5325 | 4.21410 | 13 |
| 0  | 1   | -16 | 29.1477 | 3.86615 | 12 |
| 5  | 2   | -16 | 1.64198 | 2.10328 | 10 |
| 4  | -2  | -16 | 8.47301 | 2.10480 | 10 |

|    |    |     |         |         |    |
|----|----|-----|---------|---------|----|
| 4  | 2  | -16 | 7.59323 | 2.05220 | 10 |
| 3  | -2 | -16 | 3.51381 | 2.34012 | 10 |
| 3  | 2  | -16 | 2.11966 | 1.62490 | 10 |
| 2  | -2 | -16 | 34.8249 | 3.78275 | 14 |
| 2  | -2 | -16 | 32.1571 | 3.53378 | 10 |
| 2  | 2  | -16 | 30.0085 | 4.04583 | 14 |
| 2  | 2  | -16 | 24.2192 | 3.15454 | 10 |
| 1  | -2 | -16 | 60.6107 | 4.93182 | 14 |
| 1  | -2 | -16 | 54.6236 | 4.95472 | 10 |
| 1  | -2 | -16 | 55.6999 | 4.47158 | 12 |
| -1 | -2 | 16  | 56.1022 | 5.23192 | 13 |
| 1  | 2  | -16 | 51.7850 | 4.58154 | 10 |
| 1  | 2  | -16 | 52.1929 | 4.86231 | 14 |
| 0  | -2 | -16 | 11.1325 | 1.71386 | 14 |
| 0  | -2 | -16 | 9.98370 | 2.15115 | 10 |
| 0  | -2 | 16  | 6.16972 | 2.24394 | 13 |
| 0  | -2 | -16 | 11.5169 | 1.87435 | 12 |
| 0  | 2  | -16 | 6.60487 | 1.42095 | 11 |
| 0  | 2  | -16 | 5.22504 | 1.86708 | 14 |
| 5  | 3  | -16 | 2.04668 | 2.11366 | 10 |
| 4  | -3 | -16 | 4.61826 | 1.74821 | 10 |
| 4  | 3  | -16 | 1.09521 | 2.22872 | 10 |
| 3  | -3 | -16 | 1.42648 | 1.67736 | 10 |
| 3  | 3  | -16 | 0.15025 | 2.11591 | 10 |
| 2  | -3 | -16 | 8.04782 | 2.45639 | 10 |
| 2  | 3  | -16 | 7.28093 | 1.79251 | 10 |
| 2  | 3  | -16 | 8.04205 | 2.28209 | 14 |
| -1 | -3 | 16  | 44.0143 | 4.70431 | 13 |
| 1  | -3 | -16 | 42.3272 | 3.97119 | 10 |
| 1  | 3  | -16 | 42.6418 | 4.04135 | 10 |
| 1  | 3  | -16 | 44.1574 | 4.27923 | 14 |
| 0  | -3 | -16 | 3.27054 | 1.68155 | 10 |
| 0  | -3 | 16  | 6.22322 | 2.58630 | 13 |
| 0  | -3 | -16 | 2.66330 | 1.51390 | 12 |
| 0  | 3  | -16 | 7.61066 | 1.17475 | 11 |
| 0  | 3  | -16 | 7.31858 | 1.91798 | 14 |
| 5  | 4  | -16 | 2.20471 | 1.58690 | 10 |
| 4  | -4 | -16 | 21.3584 | 2.94223 | 10 |
| -4 | 4  | 16  | 20.1139 | 3.06461 | 10 |
| 4  | 4  | -16 | 19.5162 | 2.85226 | 10 |
| 3  | -4 | -16 | -1.0327 | 2.15211 | 10 |
| 3  | 4  | -16 | 0.16652 | 2.00102 | 10 |
| -2 | -4 | 16  | 2.99747 | 2.06370 | 13 |
| 2  | -4 | -16 | 2.84441 | 1.72489 | 10 |
| 2  | 4  | -16 | 5.44902 | 1.95016 | 10 |
| 2  | 4  | -16 | 3.07398 | 2.41964 | 14 |
| -1 | -4 | 16  | 7.77637 | 2.37585 | 13 |
| 1  | -4 | -16 | 12.8366 | 2.46896 | 10 |
| 1  | 4  | -16 | 7.66520 | 2.05625 | 14 |
| 1  | 4  | -16 | 7.18545 | 1.84104 | 10 |



|    |    |     |         |         |    |
|----|----|-----|---------|---------|----|
| 0  | -4 | -16 | 20.0104 | 2.74450 | 12 |
| 0  | -4 | 16  | 26.4205 | 3.72708 | 13 |
| 0  | -4 | -16 | 16.1529 | 2.77840 | 10 |
| 0  | 4  | -16 | 26.6107 | 3.28568 | 14 |
| 0  | 4  | -16 | 25.6881 | 2.21536 | 11 |
| -4 | 5  | 16  | 4.12444 | 1.81034 | 10 |
| 4  | 5  | -16 | 3.56024 | 2.09011 | 10 |
| 3  | -5 | -16 | 2.45209 | 1.67560 | 10 |
| 3  | 5  | -16 | 6.13062 | 2.14965 | 10 |
| 2  | -5 | -16 | 2.27309 | 1.56891 | 10 |
| -2 | -5 | 16  | 2.38887 | 2.06400 | 13 |
| 2  | 5  | -16 | 2.38330 | 1.62060 | 10 |
| -1 | -5 | 16  | 3.38129 | 2.09451 | 13 |
| 1  | -5 | -16 | 3.38295 | 1.54781 | 10 |
| 1  | 5  | -16 | 2.09058 | 1.77445 | 14 |
| 1  | 5  | -16 | 4.18948 | 1.35844 | 11 |
| 0  | -5 | 16  | 24.0638 | 4.11976 | 13 |
| 0  | -5 | -16 | 18.2703 | 2.73247 | 10 |
| 0  | -5 | -16 | 18.0129 | 2.52331 | 12 |
| 0  | 5  | -16 | 19.7712 | 3.00018 | 14 |
| 4  | 6  | -16 | 5.11529 | 1.62382 | 10 |
| 3  | -6 | -16 | 4.91632 | 1.73442 | 10 |
| 3  | 6  | -16 | 2.63773 | 1.80148 | 10 |
| -2 | -6 | 16  | 7.49295 | 2.17364 | 13 |
| 2  | -6 | -16 | 5.39803 | 1.82978 | 10 |
| 2  | 6  | -16 | 5.38764 | 1.59856 | 10 |
| -1 | -6 | 16  | 16.2277 | 2.91006 | 13 |
| 1  | -6 | -16 | 11.3951 | 2.31886 | 10 |
| 1  | 6  | -16 | 15.2399 | 1.78093 | 11 |
| 1  | 6  | -16 | 14.9005 | 2.24940 | 14 |
| 4  | 7  | -16 | -0.5349 | 1.69594 | 10 |
| 3  | 7  | -16 | 6.43781 | 1.80158 | 10 |
| -2 | -7 | 16  | 25.2581 | 3.57043 | 13 |
| 2  | -7 | -16 | 22.2691 | 3.52906 | 10 |
| 1  | -7 | -16 | 11.4403 | 2.46872 | 10 |
| -1 | -7 | 16  | 14.3759 | 2.49799 | 13 |
| 1  | 7  | -16 | 16.0540 | 1.78565 | 11 |
| 1  | 7  | -16 | 14.6313 | 2.17427 | 14 |
| -2 | -8 | 16  | 19.8997 | 3.28882 | 13 |
| -1 | -8 | 16  | 5.05938 | 2.63573 | 13 |
| 0  | 0  | 0   | 0.00    | 0.00    | 0  |

;

\_shelx\_hkl\_checksum 12380

\_shelx\_SHELXL\_version\_number '2014/7'

\_olex2\_submission\_special\_instructions 'No special instructions were received'
